# Supplementary material for: The Arabidopsis Root Tip (Phospho)Proteomes at Growth-Promoting versus Growth-Repressing Conditions Reveal Novel Root Growth Regulators
Source: Cells. 2021 Jul 2;10(7):1665. doi: 10.3390/cells10071665 (PMC8303113; doi:10.3390/cells10071665)
Supplement: Supplementary file 1 [file cells-10-01665-s001.zip]

Archive with 10 entries (10 files):
- Nikonorova_SupplementaryInformation.pdf
- Nikonorova_Table S1.xlsx
- Nikonorova_Table S2.xlsx
- Nikonorova_Table S3.xlsx
- Nikonorova_Table S4.xlsx
- Nikonorova_Table S5.xlsx
- Nikonorova_Table S6.xlsx
- Nikonorova_Table S7.xlsx
- Nikonorova_Table S8.xlsx
- Nikonorova_Table S9.xlsx
