# Supplementary material for: The Arabidopsis Root Tip (Phospho)Proteomes at Growth-Promoting versus Growth-Repressing Conditions Reveal Novel Root Growth Regulators
Source: Cells. 2021 Jul 2;10(7):1665. doi: 10.3390/cells10071665 (PMC8303113; doi:10.3390/cells10071665)
Supplement: Supplementary file 1 [file cells-10-01665-s001.zip › Nikonorova_Table S1.xlsx]

## Sheet: All identifications
Table S1. Proteome analysis of control and auxin-treated seedlings.
Majority protein IDs	Fasta headers	Score	Peptide counts (all)	Peptide counts (unique)	LFQ intensity 08_2p3_EXT-888_PSB_NP_10-1	LFQ intensity 12_2p3_EXT-888_PSB_NP_100-1	LFQ intensity 14_2p3_EXT-888_PSB_NP_0-1	LFQ intensity 16_2p3_EXT-888_PSB_NP_01-1	LFQ intensity 18_2p3_EXT-888_PSB_NP_01-2	LFQ intensity 22_2p3_EXT-888_PSB_NP_10-2_170502120950	LFQ intensity 24_2p3_EXT-888_PSB_NP_0-2	LFQ intensity 26_2p3_EXT-888_PSB_NP_10-3	LFQ intensity 28_2p3_EXT-888_PSB_NP_100-3	LFQ intensity 32_2p3_EXT-888_PSB_NP_100-2	LFQ intensity 34_2p3_EXT-888_PSB_NP_01-3	LFQ intensity 36_2p3_EXT-888_PSB_NP_0-3	LFQ intensity 38_2p3_EXT-888_PSB_NP_10-4	LFQ intensity 40_2p3_EXT-888_PSB_NP_0-4	LFQ intensity 42_2p3_EXT-888_PSB_NP_01-4	LFQ intensity 46_2p3_EXT-888_PSB_NP_100-4	LFQ intensity 48_2p3_EXT-888_PSB_NP_10-5	LFQ intensity 50_2p3_EXT-888_PSB_NP_0-5	LFQ intensity 52_2p3_EXT-888_PSB_NP_100-5	LFQ intensity 56_2p3_EXT-888_PSB_NP_01-5
AT1G01050.1	pyrophosphorylase 1	114.25	5	2	480970000	633920000	607060000	579940000	602660000	521200000	747740000	493120000	845330000	717180000	553610000	562380000	574150000	793540000	562460000	928900000	673890000	633500000	519780000	355600000
AT1G01090.1	pyruvate dehydrogenase E1 alpha	151.62	9	9	1239200000	652940000	994890000	1035600000	1242600000	1038800000	1511200000	861660000	995530000	711890000	886520000	908260000	756550000	1145700000	1127100000	937630000	779550000	1047500000	783560000	409050000
AT1G01100.4;AT1G01100.2;AT1G01100.1;AT1G01100.3	60S acidic ribosomal protein family ; 60S acidic ribosomal protein family ; 60S acidic ribosomal protein family ; 60S acidic ribosomal protein family	192.51	3;3;3;2	2;2;2;1	841830000	733560000	609670000	827660000	688790000	503980000	893700000	482110000	796640000	601800000	702640000	597500000	438620000	779510000	551040000	388560000	277960000	397950000	242600000	362380000
AT1G01220.1	L-fucokinase/GDP-L-fucose pyrophosphorylase	13.078	1	1	0	0	0	0	0	0	0	0	0	0	0	0	0	0	0	0	0	0	0	4580700
AT1G01300.1	Eukaryotic aspartyl protease family protein	4.3009	2	2	0	0	0	0	0	0	0	0	0	0	0	0	0	0	0	56645000	0	0	0	0
AT1G01470.1	Late embryogenesis abundant protein	41.366	2	2	0	0	0	50403000	0	0	0	0	66789000	65361000	49467000	0	0	0	50449000	0	0	0	35460000	29032000
AT1G01510.1	NAD(P)-binding Rossmann-fold superfamily protein	6.0322	1	1	0	0	0	0	0	0	0	0	0	0	0	0	0	0	0	0	0	0	0	2590300
AT1G01560.2;AT4G01370.1;AT1G01560.1	MAP kinase 11 ; MAP kinase 4 ; MAP kinase 11	20.482	3;3;2	2;2;1	0	0	0	0	0	0	0	0	0	0	0	0	0	0	0	0	0	0	53904000	0
AT1G01620.1;AT1G01620.2	plasma membrane intrinsic protein 1C ; plasma membrane intrinsic protein 1C	18.793	5;3	2;1	113100000	79849000	75183000	132410000	140540000	125160000	88726000	108010000	80593000	81075000	92408000	100790000	99480000	202130000	0	113910000	128960000	121720000	71679000	120240000
AT1G01750.1	actin depolymerizing factor 11	39.946	3	2	19047000	348270000	0	0	0	8518900	4467300	0	0	0	0	16779000	0	0	0	0	0	0	0	0
AT1G01800.2;AT1G01800.1	NAD(P)-binding Rossmann-fold superfamily protein ; NAD(P)-binding Rossmann-fold superfamily protein	11.18	2;2	2;2	106600000	128640000	91310000	0	209420000	0	0	0	0	100470000	110430000	137310000	0	54752000	0	196700000	0	171320000	0	0
AT1G01910.4;AT1G01910.2;AT1G01910.1;AT1G01910.5;AT1G01910.3	P-loop containing nucleoside triphosphate hydrolases superfamily protein ; P-loop containing nucleoside triphosphate hydrolases superfamily protein ; P-loop containing nucleoside triphosphate hydrolases superfamily protein ; P-loop containing nucleoside t	52.935	2;2;2;1;1	2;2;2;1;1	114770000	91462000	123490000	127830000	104500000	60101000	138070000	77147000	79379000	97845000	114330000	103340000	120180000	127250000	87800000	94675000	125200000	61673000	77711000	109650000
AT1G01960.1	SEC7-like guanine nucleotide exchange family protein	34.998	6	6	79304000	62604000	57683000	84588000	58274000	43011000	0	47268000	83006000	96208000	70743000	62594000	86941000	86951000	56609000	76540000	0	110100000	0	72566000
AT1G02080.2;AT1G02080.1	transcription regulators ; transcription regulators	97.674	7;7	7;7	85635000	53255000	72502000	80234000	61067000	48704000	78626000	56779000	85323000	95994000	65997000	74515000	90774000	88075000	56923000	73606000	43200000	90514000	27576000	76233000
AT1G02090.2;AT1G02090.3;AT1G02090.1	Proteasome component (PCI) domain protein ; Proteasome component (PCI) domain protein ; Proteasome component (PCI) domain protein	9.2619	1;1;1	1;1;1	0	0	0	11360000	0	0	0	0	0	0	0	0	0	0	0	7862200	0	26579000	0	0
AT1G02140.1	mago nashi family protein	77.861	2	2	0	0	0	184810000	358200000	0	0	0	0	0	0	0	0	0	204800000	0	204220000	277330000	133250000	0
AT1G02305.1	Cysteine proteinases superfamily protein	15.481	3	3	244920000	413100000	211960000	25451000	23538000	92897000	6225100	325620000	469550000	238590000	112680000	276160000	198550000	8078700	71106000	33719000	112880000	39058000	397520000	165430000
AT1G02370.1	Tetratricopeptide repeat (TPR)-like superfamily protein	2.4974	1	1	0	0	0	0	0	0	0	0	0	0	0	0	0	0	0	0	0	23657000	0	0
AT1G02500.2;AT1G02500.1	S-adenosylmethionine synthetase 1 ; S-adenosylmethionine synthetase 1	32.208	16;16	4;4	417990000	479390000	352880000	555010000	508180000	214540000	626710000	244460000	362100000	381460000	371670000	309030000	268330000	493030000	467300000	343390000	0	367490000	361500000	275100000
AT1G02690.1;AT1G02690.2	importin alpha isoform 6 ; importin alpha isoform 6	14.105	5;5	3;3	0	137870000	194760000	140250000	220130000	151090000	119660000	120420000	0	0	0	139760000	147580000	159280000	145540000	97518000	151250000	160560000	70315000	0
AT1G02780.1	Ribosomal protein L19e family protein	118.99	4	2	1448500000	1332800000	1314000000	1986100000	2992700000	3970000000	2077800000	2180300000	1349400000	1561500000	1282000000	2513900000	1650500000	3452500000	2460700000	3069100000	4007300000	2553100000	1234700000	1862400000
AT1G02840.2;AT1G02840.3;AT1G02840.1	RNA-binding (RRM/RBD/RNP motifs) family protein ; RNA-binding (RRM/RBD/RNP motifs) family protein ; RNA-binding (RRM/RBD/RNP motifs) family protein	13.636	4;4;4	3;3;3	161210000	127070000	119690000	193960000	147790000	134470000	212110000	154950000	90171000	57015000	0	144030000	214960000	240930000	123280000	207560000	172920000	77252000	122340000	85024000
AT1G02920.1	glutathione S-transferase 7	75.746	1	1	0	0	0	0	0	0	70535000	39020000	0	0	119180000	21583000	0	0	51358000	0	0	0	0	13093000
AT1G02930.2;AT1G02930.1	glutathione S-transferase 6 ; glutathione S-transferase 6	52.032	2;2	2;2	0	18106000	210880000	0	40374000	0	53765000	137280000	0	0	285880000	53835000	43657000	44344000	75243000	0	17372000	29083000	0	41614000
AT1G03110.1	Transducin/WD40 repeat-like superfamily protein	2.18	1	1	0	0	0	0	0	0	0	0	0	0	0	0	0	0	0	0	0	0	0	58938000
AT1G03220.1	Eukaryotic aspartyl protease family protein	241.88	11	9	1506300000	2081300000	1059600000	1395700000	1365100000	1116700000	1234900000	902400000	1558900000	2455700000	1306500000	1386800000	1228800000	1878600000	1071000000	1407900000	1523200000	1402600000	1559500000	1152300000
AT1G03230.1	Eukaryotic aspartyl protease family protein	125.08	10	8	630680000	650250000	496900000	597210000	542590000	433220000	573850000	372840000	585710000	598920000	352740000	498200000	468500000	919000000	238980000	586540000	581260000	465430000	429330000	414520000
AT1G03250.1;AT1G03250.2	unknown protein; Has 89 Blast hits to 89 proteins in 31 species: Archae - 0; Bacteria - 0; Metazoa - 31; Fungi - 0; Plants - 48; Viruses - 0; Other Eukaryotes - 10 (source: NCBI BLink). ; unknown protein; FUNCTIONS IN: molecular_function unknown; INVOLVED	2.2333	1;1	1;1	0	0	0	0	0	0	0	0	0	0	0	0	0	0	0	0	0	0	0	3025400
AT1G03350.1	BSD domain-containing protein	6.003	1	1	0	0	0	0	0	0	0	0	0	0	0	0	0	0	0	0	0	0	35476000	0
AT1G03475.1	Coproporphyrinogen III oxidase	7.5906	2	2	0	0	0	0	0	0	0	0	0	0	0	0	0	0	0	0	0	53073000	0	0
AT1G03630.2;AT1G03630.1	protochlorophyllide oxidoreductase C ; protochlorophyllide oxidoreductase C	-2	1;1	1;1	0	0	0	0	0	0	0	0	0	0	0	0	0	0	0	0	0	0	0	95091000
AT1G03680.1	thioredoxin M-type 1	1.9029	1	1	0	0	0	0	0	0	0	0	0	0	0	0	0	0	0	0	0	0	19759000	0
AT1G03860.3;AT1G03860.1;AT1G03860.2	prohibitin 2 ; prohibitin 2 ; prohibitin 2	67.255	7;7;6	5;5;4	515100000	415440000	524950000	476810000	921880000	877490000	996280000	726170000	440510000	334630000	567990000	591980000	437400000	318910000	561160000	617720000	533540000	676230000	476970000	0
AT1G03870.1	FASCICLIN-like arabinoogalactan 9	136.41	3	2	1039700000	757010000	952480000	659750000	1149000000	830470000	1599100000	1007300000	783590000	813840000	650540000	857410000	803880000	816720000	954840000	906140000	854640000	763180000	718840000	939180000
AT1G03900.1	non-intrinsic ABC protein 4	8.6568	3	3	0	0	0	0	0	0	0	0	0	0	0	0	0	0	44640000	0	0	0	0	0
AT1G04040.1	HAD superfamily, subfamily IIIB acid phosphatase	22.947	2	2	0	0	0	0	24614000	0	0	0	0	0	0	0	0	0	0	0	0	0	0	0
AT1G04080.1;AT1G04080.3;AT1G04080.2	Tetratricopeptide repeat (TPR)-like superfamily protein ; Tetratricopeptide repeat (TPR)-like superfamily protein ; Tetratricopeptide repeat (TPR)-like superfamily protein	32.586	9;9;8	9;9;8	98585000	107740000	145320000	155460000	120680000	131110000	115850000	91792000	126810000	119410000	89780000	88504000	95725000	176400000	88832000	111440000	88259000	152140000	115040000	0
AT1G04120.2;AT1G04120.1	multidrug resistance-associated protein 5 ; multidrug resistance-associated protein 5	2.0996	1;1	1;1	0	0	0	0	0	0	0	0	0	0	0	0	0	0	0	0	0	0	0	1944600
AT1G04170.1	eukaryotic translation initiation factor 2 gamma subunit	132.97	9;2;2	9;2;2	339710000	309940000	351660000	395420000	801070000	765280000	675480000	602010000	374020000	296650000	436850000	392880000	378840000	793150000	694290000	595830000	672990000	573090000	289090000	500600000
AT1G04190.1	Tetratricopeptide repeat (TPR)-like superfamily protein	7.2602	2	2	95340000	73480000	108470000	118220000	87389000	73782000	245710000	89602000	87226000	0	92389000	64270000	88451000	49339000	0	54065000	96134000	0	96580000	0
AT1G04200.1	FUNCTIONS IN: molecular_function unknown; INVOLVED IN: N-terminal protein myristoylation; LOCATED IN: cellular_component unknown; EXPRESSED IN: 22 plant structures; EXPRESSED DURING: 13 growth stages; CONTAINS InterPro DOMAIN/s: Dymeclin (InterPro:IPR0191	3.4876	2	2	0	0	0	0	0	0	0	0	0	0	0	0	4624800	0	0	0	0	0	0	0
AT1G04260.1	CAMV movement protein interacting protein 7	7.759	1	1	0	0	0	0	0	0	0	0	0	0	0	0	0	0	0	0	0	0	0	12862000
AT1G04270.2;AT1G04270.1	cytosolic ribosomal protein S15 ; cytosolic ribosomal protein S15	138.98	7;7;3	2;2;0	1063100000	1044300000	979700000	979220000	885690000	1122400000	1501400000	1473400000	976920000	869230000	2645900000	755030000	1006300000	1203300000	1542500000	640200000	1751500000	866960000	1414300000	960540000
AT1G04410.1	Lactate/malate dehydrogenase family protein	323.31	14;6;1	14;6;1	6316500000	6750200000	6803700000	5436600000	7159000000	4998500000	11165000000	5485200000	8124900000	5369500000	6609500000	4560600000	4364100000	7202100000	5175500000	6449400000	7376300000	5639000000	6150100000	4884800000
AT1G04430.2;AT1G04430.1	S-adenosyl-L-methionine-dependent methyltransferases superfamily protein ; S-adenosyl-L-methionine-dependent methyltransferases superfamily protein	21.385	4;4	4;4	121730000	118250000	108630000	139630000	91012000	146170000	140490000	0	0	108420000	0	113710000	127480000	95901000	158730000	142730000	122710000	179780000	105860000	159150000
AT1G04510.2;AT1G04510.1	MOS4-associated complex 3A ; MOS4-associated complex 3A	21.228	3;3	1;1	0	0	0	0	0	0	0	0	0	0	0	0	0	0	0	0	0	18167000	0	0
AT1G04630.1	GRIM-19 protein	-2	4	1	0	0	0	0	0	0	0	0	0	0	0	0	0	0	0	0	0	0	0	24474000
AT1G04690.1	potassium channel beta subunit 1	171.15	7	7	652120000	539870000	716770000	667470000	440790000	474290000	632590000	423390000	546860000	736570000	588000000	590060000	662110000	837060000	454910000	474400000	434140000	846460000	397230000	591350000
AT1G04750.2;AT1G04750.1;AT2G33120.1;AT2G33120.2	vesicle-associated membrane protein 721 ; vesicle-associated membrane protein 721 ; synaptobrevin-related protein 1 ; synaptobrevin-related protein 1	3.06	1;1;1;1	1;1;1;1	0	0	0	0	0	0	0	0	0	0	0	0	0	0	0	0	0	0	0	26993000
AT1G04810.1	26S proteasome regulatory complex, non-ATPase subcomplex, Rpn2/Psmd1 subunit	6.3499	10	2	0	0	0	0	0	0	0	0	0	0	0	0	0	0	0	0	0	18359000	0	0
AT1G50010.1;AT1G04820.1	tubulin alpha-2 chain ; tubulin alpha-4 chain	8.2406	21;21	1;1	537210000	598250000	535150000	489420000	1304500000	842970000	683090000	678270000	0	139580000	543730000	673690000	503810000	434750000	677990000	1457700000	783300000	637200000	0	0
AT1G04850.1	ubiquitin-associated (UBA)/TS-N domain-containing protein	28.085	2	2	128580000	144600000	157240000	113000000	75511000	99720000	62264000	105290000	140060000	107710000	139920000	105260000	112170000	58167000	77590000	86954000	88286000	93152000	135650000	139340000
AT1G04870.2;AT1G04870.1	protein arginine methyltransferase 10 ; protein arginine methyltransferase 10	77.632	5;4	5;4	164180000	143970000	130740000	158180000	151050000	153650000	105170000	124230000	123450000	188720000	130500000	110250000	143650000	212740000	99528000	91228000	160410000	212760000	118280000	112620000
AT1G04980.1	PDI-like 2-2	48	4	4	168410000	89996000	116550000	163170000	112550000	104980000	16069000	79117000	70187000	62898000	79994000	133560000	111880000	113370000	67140000	45990000	0	114270000	46582000	83782000
AT1G05010.1	ethylene-forming enzyme	8.434	1	1	0	0	0	0	0	0	0	0	0	0	0	0	0	0	0	0	0	0	0	8563600
AT1G05180.1	NAD(P)-binding Rossmann-fold superfamily protein	7.0811	2	2	0	0	0	0	0	0	0	0	0	0	0	0	34788000	0	0	0	0	0	0	0
AT1G05250.1;AT1G05240.1	Peroxidase superfamily protein ; Peroxidase superfamily protein	53.45	6;6	6;6	0	188730000	0	0	22659000	0	0	0	177630000	212410000	0	0	0	0	0	98097000	0	0	170300000	0
AT1G05260.1	Peroxidase superfamily protein	54.801	6	6	218370000	175430000	253130000	247650000	242470000	187380000	240670000	178200000	186130000	215300000	170080000	217480000	190950000	318910000	139930000	228910000	189020000	0	227000000	155990000
AT1G05350.1	NAD(P)-binding Rossmann-fold superfamily protein	31.987	3	3	51507000	0	58397000	87714000	84495000	76503000	110020000	81284000	76738000	0	0	63190000	63385000	66919000	79951000	65999000	0	75584000	88194000	75887000
AT1G05500.1	Calcium-dependent lipid-binding (CaLB domain) family protein	20.517	2	2	43487000	34230000	34869000	41772000	29272000	26762000	39960000	24780000	31752000	63327000	33536000	36582000	40896000	47629000	25473000	41625000	0	51700000	0	43073000
AT1G05520.1	Sec23/Sec24 protein transport family protein	102.54	10	7	160920000	198190000	166810000	154440000	134140000	92510000	156500000	80577000	150420000	208060000	134080000	132010000	151350000	182330000	106790000	128940000	86112000	169830000	132850000	116800000
AT1G05560.1	UDP-glucosyltransferase 75B1	17.189	4;1	4;1	47616000	0	104040000	0	0	0	26929000	72471000	50059000	0	164380000	33781000	63975000	62211000	105740000	0	0	0	0	71177000
AT1G05600.2;AT1G05600.1	Tetratricopeptide repeat (TPR)-like superfamily protein ; Tetratricopeptide repeat (TPR)-like superfamily protein	-2	1;1	1;1	0	0	0	0	0	0	0	0	0	0	0	0	0	0	0	0	0	0	0	189560000
AT1G05620.2;AT1G05620.1	uridine-ribohydrolase 2 ; uridine-ribohydrolase 2	52.416	5;5	5;5	132150000	150900000	112380000	120200000	0	49130000	109760000	77001000	148390000	138830000	129990000	134150000	86278000	53415000	86598000	147250000	74424000	151630000	140280000	149410000
AT1G05675.1;AT1G05680.1	UDP-Glycosyltransferase superfamily protein ; Uridine diphosphate glycosyltransferase 74E2	2.754	2;1	2;1	0	0	0	0	0	0	0	0	0	0	0	0	0	0	0	0	0	0	89559000	0
AT1G05720.1	selenoprotein family protein	6.5305	2	2	0	0	0	0	0	0	0	0	0	0	0	0	0	0	0	0	0	38944000	0	0
AT1G05850.1	Chitinase family protein	19.155	3	3	0	0	0	0	0	95670000	0	86555000	0	0	0	0	0	63243000	86275000	0	58075000	54505000	0	0
AT1G05940.1	cationic amino acid transporter 9	3.6589	1	1	0	0	0	0	0	0	0	0	0	0	0	0	0	0	0	0	0	0	0	1350500
AT1G06000.1	UDP-Glycosyltransferase superfamily protein	140.66	6	6	143370000	159240000	149790000	146500000	128470000	80689000	123000000	104580000	197220000	244560000	176860000	126300000	147910000	134900000	126200000	180980000	110690000	204040000	114380000	160080000
AT1G06060.1	LisH and RanBPM domains containing protein	2.4235	1	1	0	0	0	0	0	0	0	0	0	0	0	0	0	0	0	0	0	0	9215100	0
AT1G06210.1	ENTH/VHS/GAT family protein	47.455	3	3	42907000	0	42749000	70812000	12509000	73096000	0	0	101400000	166890000	65210000	92657000	0	12724000	32118000	43779000	0	58365000	0	0
AT1G06220.2;AT1G06220.1;AT5G25230.1	Ribosomal protein S5/Elongation factor G/III/V family protein ; Ribosomal protein S5/Elongation factor G/III/V family protein ; Ribosomal protein S5/Elongation factor G/III/V family protein	15.625	6;6;5	6;6;5	79281000	131150000	97128000	90701000	131950000	103420000	132330000	90639000	77590000	103970000	100220000	84571000	77258000	170840000	0	82730000	98488000	87352000	81810000	99124000
AT1G06290.1;AT3G06690.1	acyl-CoA oxidase 3 ; acyl-CoA oxidases;oxidoreductases, acting on the CH-CH group of donors;FAD binding;oxidoreductases;acyl-CoA oxidases	28.118	6;3;2	6;3;2	228590000	204540000	145020000	190400000	204340000	198820000	248730000	200110000	173790000	194560000	165830000	204160000	253260000	248180000	214140000	312910000	225740000	156520000	138720000	221980000
AT1G06430.1;AT2G30950.1	FTSH protease 8 ; FtsH extracellular protease family	29.703	1;1	1;1	0	0	0	0	0	0	0	0	0	0	0	0	0	0	0	0	0	0	0	14927000
AT1G06530.1	Tropomyosin-related	28.166	4	4	0	0	84524000	0	0	0	58131000	0	0	0	76036000	0	64847000	0	0	103930000	0	0	51085000	0
AT1G06550.1	ATP-dependent caseinolytic (Clp) protease/crotonase family protein	30.322	1	1	0	0	0	0	0	0	0	0	0	0	0	0	0	0	0	0	0	0	64034000	0
AT1G06640.1	2-oxoglutarate (2OG) and Fe(II)-dependent oxygenase superfamily protein	7.7649	1	1	0	0	0	0	0	0	0	0	0	0	0	0	0	0	0	0	0	0	1667200	0
AT1G06680.2;AT1G06680.1	photosystem II subunit P-1 ; photosystem II subunit P-1	11.214	1;1	1;1	0	0	0	0	0	0	0	0	0	0	0	9014800	0	0	0	0	0	0	0	0
AT1G06890.3;AT1G06890.2;AT1G06890.1	nodulin MtN21 /EamA-like transporter family protein ; nodulin MtN21 /EamA-like transporter family protein ; nodulin MtN21 /EamA-like transporter family protein	15.862	2;2;2	2;2;2	0	42240000	36346000	0	0	0	12614000	53166000	0	48903000	43097000	0	0	0	0	0	26864000	0	0	0
AT1G06900.1	Insulinase (Peptidase family M16) family protein	208.06	10	10	413660000	338560000	429140000	425980000	383840000	268840000	488950000	274100000	431610000	446240000	378600000	334360000	411280000	444050000	341150000	319960000	369350000	327340000	254770000	453320000
AT1G06950.1	translocon at the inner envelope membrane of chloroplasts 110	12.607	7	7	130560000	0	0	128120000	162880000	0	155620000	114150000	0	0	106980000	0	69929000	171600000	92507000	0	0	0	0	0
AT1G07000.1	exocyst subunit exo70 family protein B2	4.6758	1	1	0	0	0	0	0	0	0	0	0	0	0	0	0	0	0	4409100	0	0	0	0
AT1G07080.1	Thioredoxin superfamily protein	2.3707	2	2	0	0	0	0	0	0	0	0	0	0	0	0	0	0	0	0	0	28064000	0	0
AT1G07140.1	Pleckstrin homology (PH) domain superfamily protein	138.61	6	4	516960000	515890000	352000000	408320000	829910000	978820000	865750000	884190000	484590000	536820000	685850000	600660000	383020000	292300000	608000000	706140000	462760000	796230000	1162700000	638490000
AT2G30000.1;AT1G07170.3;AT1G07170.2;AT1G07170.1	PHF5-like protein ; PHF5-like protein ; PHF5-like protein ; PHF5-like protein	6.8949	1;1;1;1	1;1;1;1	0	0	0	0	0	0	0	0	0	0	0	0	0	0	0	0	0	38857000	0	0
AT1G07210.1	Ribosomal protein S18	3.6779	2	2	0	0	0	0	0	0	0	0	0	0	0	0	0	0	0	0	0	49239000	0	0
AT1G07230.1	non-specific phospholipase C1	6.5318	1	1	0	0	0	0	0	0	0	0	0	0	0	0	0	0	0	0	0	0	0	6223200
AT1G07360.1;AT2G29580.1	CCCH-type zinc fingerfamily protein with RNA-binding domain ; CCCH-type zinc fingerfamily protein with RNA-binding domain	9.3834	1;1	1;1	0	0	0	0	0	0	0	0	0	0	0	0	0	0	0	0	0	32328000	0	0
AT1G07410.1	RAB GTPase homolog A2B	1.9521	4	1	0	0	0	0	0	0	0	0	0	0	0	0	0	0	0	0	1985400	0	0	0
AT5G59970.1;AT5G59690.1;AT3G53730.1;AT3G46320.1;AT3G45930.1;AT2G28740.1;AT1G07820.2;AT1G07820.1;AT1G07660.1;AT1G07660.2	Histone superfamily protein ; Histone superfamily protein ; Histone superfamily protein ; Histone superfamily protein ; Histone superfamily protein ; histone H4 ; Histone superfamily protein ; Histone superfamily protein ; Histone superfamily protein ; Hi	20.459	5;5;5;5;5;5;5;5;5;4	5;5;5;5;5;5;5;5;5;4	609010000	754630000	414370000	636770000	500530000	422400000	272510000	1957200000	1324200000	763000000	1405000000	496950000	379300000	507930000	1100200000	432430000	1410000000	717620000	1687000000	782570000
AT1G07670.1	endomembrane-type CA-ATPase 4	110.43	10	2	310950000	271700000	355210000	307470000	304590000	452860000	422970000	429060000	317580000	245890000	443050000	333040000	310640000	134890000	318820000	273690000	371360000	323970000	390270000	439910000
AT1G07750.1	RmlC-like cupins superfamily protein	18.67	3;1	3;1	85135000	44484000	97194000	87977000	123990000	74432000	138950000	0	107730000	23819000	91616000	73169000	56734000	81328000	99159000	73771000	100420000	0	68986000	0
AT5G59850.1;AT1G07770.2;AT1G07770.1;AT3G46040.1	Ribosomal protein S8 family protein ; ribosomal protein S15A ; ribosomal protein S15A ; ribosomal protein S15A D	53.419	3;3;3;2;1	3;3;3;2;1	98391000	63375000	427780000	116990000	2978200000	462040000	509760000	0	0	1121500000	436050000	0	1101700000	2006900000	497380000	2582300000	1865900000	0	270120000	413530000
AT1G07810.1	ER-type Ca2+-ATPase 1	11.434	9	1	0	0	0	0	0	0	0	0	0	0	0	0	0	0	0	0	0	0	0	30412000
AT1G07830.1	ribosomal protein L29 family protein	47.668	3	3	93597000	70920000	72729000	0	0	0	0	0	0	0	0	0	0	0	0	0	0	0	0	0
AT1G07890.8;AT1G07890.7;AT1G07890.5;AT1G07890.4;AT1G07890.3;AT1G07890.2;AT1G07890.1;AT1G07890.6	ascorbate peroxidase 1 ; ascorbate peroxidase 1 ; ascorbate peroxidase 1 ; ascorbate peroxidase 1 ; ascorbate peroxidase 1 ; ascorbate peroxidase 1 ; ascorbate peroxidase 1 ; ascorbate peroxidase 1	323.31	14;14;14;14;14;14;14;13	13;13;13;13;13;13;13;12	4271500000	5193200000	4945000000	4944800000	7399600000	4944000000	6614300000	5266500000	5537600000	5860900000	5688800000	4969100000	5430200000	6361600000	5508300000	6669500000	5883600000	5811100000	6924200000	4747700000
AT5G60390.3;AT5G60390.1;AT1G07940.2;AT1G07940.1;AT1G07930.1;AT1G07920.1;AT5G60390.2;AT1G07930.2	GTP binding Elongation factor Tu family protein ; GTP binding Elongation factor Tu family protein ; GTP binding Elongation factor Tu family protein ; GTP binding Elongation factor Tu family protein ; GTP binding Elongation factor Tu family protein ; GTP b	323.31	18;18;18;18;18;18;15;14	18;18;18;18;18;18;15;14	31666000000	32953000000	32777000000	25276000000	42241000000	27472000000	47973000000	28296000000	37684000000	30386000000	27178000000	26436000000	27846000000	67256000000	35016000000	26058000000	36702000000	34512000000	31792000000	17715000000
AT1G07990.1	SIT4 phosphatase-associated family protein	4.5517	1	1	0	0	0	0	0	0	0	0	0	0	0	0	0	0	0	0	0	5270200	0	0
AT1G08110.3;AT1G08110.2;AT1G08110.1;AT1G08110.4	lactoylglutathione lyase family protein / glyoxalase I family protein ; lactoylglutathione lyase family protein / glyoxalase I family protein ; lactoylglutathione lyase family protein / glyoxalase I family protein ; lactoylglutathione lyase family protein	3.4308	1;1;1;1	1;1;1;1	0	0	0	0	0	0	0	0	0	0	0	0	0	0	0	0	0	0	0	41156000
AT1G08200.1	UDP-D-apiose/UDP-D-xylose synthase 2	290.54	19	6	662280000	624610000	639970000	549510000	535810000	507450000	459120000	362020000	586730000	802550000	542850000	525300000	595650000	874340000	558830000	633370000	508590000	731780000	438080000	739410000
AT1G08360.1	Ribosomal protein L1p/L10e family	76.573	6	2	306180000	181710000	278930000	372560000	669660000	591410000	369080000	361260000	0	245300000	77495000	231040000	178150000	655640000	309290000	326340000	250560000	214630000	0	0
AT1G08370.1	decapping 1	78.918	2	2	43171000	29257000	0	34815000	0	18953000	55267000	41935000	0	20949000	0	0	0	28298000	37621000	0	0	36598000	0	30011000
AT1G08420.2;AT1G08420.1;AT2G27210.2;AT2G27210.1	BRI1 suppressor 1 (BSU1)-like 2 ; BRI1 suppressor 1 (BSU1)-like 2 ; BRI1 suppressor 1 (BSU1)-like 3 ; BRI1 suppressor 1 (BSU1)-like 3	4.5682	3;3;2;2	3;3;2;2	0	0	0	0	0	0	44351000	0	0	0	0	0	0	0	0	0	0	0	0	0
AT1G08480.1	unknown protein; FUNCTIONS IN: molecular_function unknown; INVOLVED IN: biological_process unknown; LOCATED IN: mitochondrion, plasma membrane, plastid, vacuole; EXPRESSED IN: 27 plant structures; EXPRESSED DURING: 15 growth stages; Has 39 Blast hits to 3	53.141	3	3	207140000	71954000	291460000	429000000	98432000	57742000	227420000	131040000	176150000	244900000	152310000	132650000	126910000	432210000	135900000	126800000	360630000	57188000	181480000	113040000
AT1G54690.1;AT1G08880.1	gamma histone variant H2AX ; Histone superfamily protein	59.788	3;3	2;2	0	0	0	0	0	0	0	0	0	0	0	604530000	0	0	0	0	0	0	0	0
AT1G54830.3;AT1G54830.2;AT1G54830.1;AT1G08970.4;AT1G08970.3;AT1G08970.2;AT1G08970.1;AT3G48590.1;AT5G63470.2;AT5G63470.1	nuclear factor Y, subunit C3 ; nuclear factor Y, subunit C3 ; nuclear factor Y, subunit C3 ; nuclear factor Y, subunit C9 ; nuclear factor Y, subunit C9 ; nuclear factor Y, subunit C9 ; nuclear factor Y, subunit C9 ; nuclear factor Y, subunit C1 ; nuclear	3.7879	1;1;1;1;1;1;1;1;1;1	1;1;1;1;1;1;1;1;1;1	0	0	0	0	0	0	0	0	0	0	0	0	0	0	0	0	0	0	0	24552000
AT1G09020.1	homolog of yeast sucrose nonfermenting 4	10.245	3	3	0	0	0	0	0	49503000	0	0	0	0	0	0	0	0	0	0	0	0	0	0
AT1G09150.1	pseudouridine synthase and archaeosine transglycosylase (PUA) domain-containing protein	9.9845	1	1	0	0	0	0	0	0	0	0	0	0	0	0	0	0	0	0	0	33486000	0	0
AT1G09160.2;AT1G09160.1	Protein phosphatase 2C family protein ; Protein phosphatase 2C family protein	15.592	2;2	2;2	0	0	76552000	0	0	0	0	0	0	87542000	0	59912000	0	0	0	0	56395000	0	0	0
AT1G09180.1	secretion-associated RAS super family 1	-2	4	1	0	0	0	0	0	0	0	0	0	0	0	0	0	0	0	0	0	20621000	0	0
AT5G65360.1;AT5G10400.1;AT5G10390.1;AT3G27360.1;AT1G09200.1;AT5G65350.1	Histone superfamily protein ; Histone superfamily protein ; Histone superfamily protein ; Histone superfamily protein ; Histone superfamily protein ; histone 3 11	89.443	3;3;3;3;3;2	1;1;1;1;1;1	1186400000	818250000	941840000	1267500000	984230000	688990000	1036600000	660880000	1081000000	2011200000	1076900000	1128800000	1100000000	1548500000	706100000	1020800000	501090000	1720700000	743230000	1209500000
AT1G09210.1	calreticulin 1b	323.31	15	11	3005500000	2532000000	3251700000	2768300000	2656400000	2413100000	3669200000	2461700000	2305800000	2739500000	3274900000	2928600000	2757500000	4319700000	2526000000	2722800000	3176900000	2505300000	2509200000	3284900000
AT1G09270.3;AT1G09270.2;AT1G09270.1	importin alpha isoform 4 ; importin alpha isoform 4 ; importin alpha isoform 4	126.84	9;9;9	8;8;8	298790000	334390000	309130000	301550000	318300000	234520000	291580000	175330000	269170000	336650000	230170000	239330000	162750000	484170000	195800000	151790000	239030000	205100000	107870000	241290000
AT1G09320.1	agenet domain-containing protein	2.2174	1	1	5023700000	4483400000	4922300000	6039700000	12052000000	6982200000	14062000000	6074100000	4576900000	4067500000	8609100000	3637800000	3872000000	2725500000	11213000000	6813600000	10894000000	5266800000	11844000000	5758900000
AT1G09330.1	unknown protein; FUNCTIONS IN: molecular_function unknown; INVOLVED IN: biological_process unknown; LOCATED IN: integral to membrane; EXPRESSED IN: 24 plant structures; EXPRESSED DURING: 15 growth stages; CONTAINS InterPro DOMAIN/s: Protein of unknown fun	1.9207	1	1	0	0	0	0	0	0	0	0	0	0	0	0	4591800	0	0	0	0	0	0	0
AT1G09430.1	ATP-citrate lyase A-3	66.007	4	2	57437000	185640000	58946000	0	0	57686000	30180000	0	62266000	67502000	0	0	0	0	0	0	51954000	0	88513000	37481000
AT1G09560.1;AT3G62020.2;AT1G02335.1;AT3G62020.1	germin-like protein 5 ; germin-like protein 10 ; germin-like protein subfamily 2 member 2 precursor ; germin-like protein 10	39.927	2;1;1;1	2;1;1;1	284810000	291200000	151310000	204080000	252840000	250540000	391290000	215470000	175160000	220920000	202050000	188430000	245310000	71594000	220140000	330900000	255110000	215630000	0	244530000
AT1G57860.1;AT1G57660.1;AT1G09690.1;AT1G09590.1	Translation protein SH3-like family protein ; Translation protein SH3-like family protein ; Translation protein SH3-like family protein ; Translation protein SH3-like family protein	97.401	4;4;4;4	4;4;4;4	1406900000	2218800000	2307800000	1533900000	1454600000	2039500000	2667100000	1555800000	1893400000	1149500000	1714000000	1401600000	1698000000	3291200000	1807700000	740250000	1227200000	3190400000	1205100000	1341000000
AT1G09620.1	ATP binding;leucine-tRNA ligases;aminoacyl-tRNA ligases;nucleotide binding;ATP binding;aminoacyl-tRNA ligases	323.31	25	25	921670000	785370000	964930000	1080500000	981610000	814360000	1079900000	795910000	887320000	1033500000	996520000	857950000	1038900000	1312800000	831640000	861690000	898800000	1043400000	582920000	992810000
AT1G09630.1	RAB GTPase 11C	29.928	7	4	190010000	194900000	218570000	332630000	150460000	343580000	64874000	243550000	220500000	115040000	134570000	244500000	211920000	124570000	177340000	137690000	129620000	288800000	221620000	268120000
AT1G09640.1;AT1G09640.2	Translation elongation factor EF1B, gamma chain ; Translation elongation factor EF1B, gamma chain	195.17	16;8	9;5	1878800000	1607600000	1702100000	1489700000	774850000	1106300000	2193300000	1358400000	1533300000	1414200000	1498700000	1184200000	1512400000	1610700000	1820900000	1248500000	1910300000	1063500000	1258300000	1380900000
AT1G09740.1	Adenine nucleotide alpha hydrolases-like superfamily protein	4.0903	1	1	0	0	0	0	0	0	0	0	0	0	0	0	0	0	0	0	0	0	68777000	0
AT1G09750.1	Eukaryotic aspartyl protease family protein	15.167	2	2	0	0	0	0	0	0	0	0	0	0	0	0	0	79622000	0	0	0	0	0	0
AT1G09760.1	U2 small nuclear ribonucleoprotein A	33.89	5	5	211550000	213580000	167500000	139990000	209190000	181520000	208160000	154490000	191260000	181750000	221620000	230520000	305540000	279620000	180480000	229250000	199340000	211650000	176050000	318080000
AT1G09770.1	cell division cycle 5	2.9862	3	3	0	0	0	0	0	0	0	74702000	0	0	0	0	0	0	0	0	0	0	0	0
AT1G09780.1	Phosphoglycerate mutase, 2,3-bisphosphoglycerate-independent	323.31	27	19	3846700000	3612800000	3650000000	3255000000	4115700000	3372500000	5581000000	3688400000	4165000000	4174700000	4497400000	3275000000	3724900000	4685200000	3260600000	4273600000	4627000000	3438300000	3929900000	3590500000
AT1G09795.1	ATP phosphoribosyl transferase 2	10.095	1	1	0	0	0	0	0	0	0	0	0	0	0	0	0	0	0	0	0	9649600	0	0
AT1G09830.1	Glycinamide ribonucleotide (GAR) synthetase	7.756	3	3	0	0	0	0	0	0	0	0	0	0	0	0	0	0	0	24270000	0	0	0	0
AT1G09870.1	histidine acid phosphatase family protein	14.438	3	3	0	43853000	0	0	0	0	47695000	30114000	0	41828000	40268000	0	0	0	0	0	0	0	0	39514000
AT1G10130.1	endoplasmic reticulum-type calcium-transporting ATPase 3	2.8442	3	3	0	0	0	0	0	0	0	0	0	0	0	0	3984600000	0	0	0	0	0	0	0
AT1G10200.1	GATA type zinc finger transcription factor family protein	53.235	2	2	93899000	104610000	0	0	0	118450000	0	175060000	0	0	0	0	0	0	0	0	0	0	306870000	0
AT1G10230.1	SKP1-like 18	3.5167	1	1	0	0	0	0	0	0	0	0	0	0	0	0	0	0	0	0	0	0	0	3746000
AT1G10290.1	dynamin-like protein 6	137.11	18	7	593500000	631660000	629670000	790350000	769850000	951950000	1068800000	819190000	570460000	560430000	617210000	559680000	610270000	699530000	911690000	786140000	827160000	789980000	519250000	768190000
AT1G59830.2;AT1G59830.1;AT1G10430.1	protein phosphatase 2A-2 ; protein phosphatase 2A-2 ; protein phosphatase 2A-2	33.078	3;3;3	2;2;2	46671000	42862000	34372000	41122000	49201000	28514000	46877000	25978000	35496000	39601000	0	48120000	39985000	72398000	43598000	51528000	24518000	56137000	31594000	0
AT1G10490.1	Domain of unknown function (DUF1726) ;Putative ATPase (DUF699)	33.187	6;1;1	6;1;1	45316000	18231000	24893000	47158000	26404000	26330000	0	22045000	23477000	0	27220000	34408000	28825000	44821000	25467000	20200000	0	0	0	0
AT1G10510.1	RNI-like superfamily protein	1.7536	1	1	0	0	0	0	24294000	0	0	0	0	0	0	0	0	0	0	0	0	0	0	0
AT1G10522.2;AT1G10522.1	unknown protein; FUNCTIONS IN: molecular_function unknown; INVOLVED IN: biological_process unknown; LOCATED IN: chloroplast; EXPRESSED IN: 23 plant structures; EXPRESSED DURING: 13 growth stages; Has 24 Blast hits to 24 proteins in 8 species: Archae - 0;	2.7941	1;1	1;1	0	0	0	0	0	0	0	0	0	0	0	0	0	2920700	0	0	0	0	0	0
AT1G10590.2;AT1G10590.1;AT1G10590.3	Nucleic acid-binding, OB-fold-like protein ; Nucleic acid-binding, OB-fold-like protein ; Nucleic acid-binding, OB-fold-like protein	11.023	2;2;2	2;2;2	0	0	0	0	0	0	0	0	0	0	0	0	0	0	0	0	0	0	0	242750000
AT2G47170.1;AT1G10630.1;AT5G14670.1	Ras-related small GTP-binding family protein ; ADP-ribosylation factor A1F ; ADP-ribosylation factor A1B	81.793	8;8;7	1;1;0	0	0	0	0	0	0	0	0	0	0	0	0	0	0	0	0	0	0	201990000	0
AT1G10670.4;AT1G10670.2;AT1G10670.1;AT1G10670.3	ATP-citrate lyase A-1 ; ATP-citrate lyase A-1 ; ATP-citrate lyase A-1 ; ATP-citrate lyase A-1	182.52	10;10;10;10	6;6;6;6	774130000	780450000	833770000	961700000	898740000	695310000	978050000	605940000	878320000	922450000	763870000	767100000	763860000	954260000	659720000	744250000	666380000	920980000	664320000	691330000
AT1G10700.1	phosphoribosyl pyrophosphate (PRPP) synthase 3	7.0522	1	1	0	0	0	0	0	0	0	0	0	0	0	0	0	0	0	0	0	0	4887100	0
AT1G10760.1	Pyruvate phosphate dikinase, PEP/pyruvate binding domain	2.9739	1	1	0	0	0	0	16998000	0	0	0	0	0	0	0	0	0	0	0	0	0	0	0
AT1G10840.1;AT1G10840.2	translation initiation factor 3 subunit H1 ; translation initiation factor 3 subunit H1	59.012	6;5	6;5	253760000	239900000	363220000	244330000	275140000	246300000	257920000	203690000	210690000	213110000	221470000	250240000	287190000	393020000	257090000	239290000	317840000	299340000	169770000	358010000
AT1G10870.1	ARF-GAP domain 4	2.7826	1	1	0	0	0	0	0	0	0	0	0	0	0	0	0	0	0	0	0	0	0	4607800
AT1G10940.1;AT1G10940.2;AT1G60940.2;AT1G60940.1	Protein kinase superfamily protein ; Protein kinase superfamily protein ; SNF1-related protein kinase 2.10 ; SNF1-related protein kinase 2.10	10.05	3;3;2;2;1;1;1;1;1;1	2;2;1;1;1;1;1;1;1;1	0	0	0	0	0	0	0	0	0	0	0	0	0	0	0	112230000	0	0	0	0
AT1G10950.1	transmembrane nine 1	37.012	4	4	253100000	182690000	169740000	325380000	323590000	401970000	357110000	329010000	222920000	138870000	276670000	280720000	244490000	241040000	183440000	245110000	212660000	304720000	192360000	226770000
AT1G11430.1	plastid developmental protein DAG, putative	4.6613	1	1	0	0	0	0	0	0	0	0	0	0	0	0	0	0	0	0	0	0	0	11967000
AT1G11475.1	RNA polymerases N / 8 kDa subunit	17.556	1	1	0	0	0	0	0	0	0	0	0	0	0	0	0	0	0	10561000	0	0	0	0
AT1G11480.2;AT1G11480.1	eukaryotic translation initiation factor-related ; eukaryotic translation initiation factor-related	2.1027	2;2	2;2	0	0	0	0	0	0	0	0	0	0	0	0	0	0	0	0	0	0	0	9999400
AT1G11545.1	xyloglucan endotransglucosylase/hydrolase 8	3.6189	1	1	0	0	0	0	0	0	0	0	0	0	0	0	0	0	0	0	0	0	0	25077000
AT1G11580.1	methylesterase PCR A	143.91	9	9	1019600000	1373400000	947020000	1054200000	481180000	1337700000	995100000	946450000	1450000000	1713600000	1047900000	944050000	864190000	472660000	1202200000	939590000	965980000	1010600000	1674200000	1342200000
AT1G11650.1;AT1G11650.2	RNA-binding (RRM/RBD/RNP motifs) family protein ; RNA-binding (RRM/RBD/RNP motifs) family protein	158.49	5;5	5;5	289790000	285320000	344020000	301560000	279460000	270500000	342290000	237820000	292540000	270940000	268400000	254510000	259310000	268760000	222690000	216010000	261410000	298070000	286740000	113860000
AT1G11660.1	heat shock protein 70 (Hsp 70) family protein	2.3984	1	1	0	0	0	0	0	0	0	0	0	0	0	0	0	0	0	0	0	0	0	0
AT1G11680.1	CYTOCHROME P450 51G1	17.671	7	7	0	0	0	0	0	0	0	0	122920000	0	124340000	0	0	0	128150000	0	126870000	0	0	170470000
AT1G11750.1;AT1G11750.2	CLP protease proteolytic subunit 6 ; CLP protease proteolytic subunit 6	3.9335	1;1	1;1	0	0	0	0	0	0	0	0	0	0	0	0	0	0	0	0	22248000	0	0	0
AT1G11790.2;AT3G07630.2;AT3G07630.1;AT1G11790.1	arogenate dehydratase 1 ; arogenate dehydratase 2 ; arogenate dehydratase 2 ; arogenate dehydratase 1	4.0663	1;1;1;1	1;1;1;1	0	0	0	0	0	0	0	0	0	0	0	0	0	0	0	0	5033000	0	0	0
AT1G11840.5;AT1G11840.4;AT1G11840.3;AT1G11840.2;AT1G11840.1;AT1G11840.6	glyoxalase I homolog ; glyoxalase I homolog ; glyoxalase I homolog ; glyoxalase I homolog ; glyoxalase I homolog ; glyoxalase I homolog	27.703	2;2;2;2;2;2	2;2;2;2;2;2	238070000	280760000	0	0	0	118840000	0	188870000	278630000	104810000	236940000	140610000	0	312570000	258260000	207410000	218620000	0	75338000	165910000
AT1G11860.3;AT1G11860.2;AT1G11860.1	Glycine cleavage T-protein family ; Glycine cleavage T-protein family ; Glycine cleavage T-protein family	36.29	6;6;6	6;6;6	308430000	239690000	267220000	231920000	314200000	250700000	424970000	220690000	304570000	310350000	271040000	209230000	320870000	437350000	288370000	262170000	359960000	230910000	228080000	248130000
AT1G11910.1	aspartic proteinase A1	323.31	11;1;1	11;1;1	732600000	792890000	875440000	727020000	629000000	595780000	1037900000	556890000	667500000	950710000	846200000	701920000	759030000	1089700000	644330000	831610000	860760000	588270000	540490000	716420000
AT1G12000.1	Phosphofructokinase family protein	323.31	19;4	19;4	2777800000	2126000000	2656800000	2654100000	3088100000	2086000000	3828500000	1973100000	1873400000	2206800000	2170400000	2328400000	2424100000	3568000000	2540200000	2742100000	2367500000	2639700000	2113400000	2552300000
AT1G12050.1	fumarylacetoacetase, putative	22.635	2	2	42464000	36512000	47337000	45534000	33311000	31940000	48320000	32863000	45134000	50688000	48960000	38173000	46763000	53861000	34655000	40344000	30553000	43758000	0	63066000
AT1G12080.2;AT1G12080.1	Vacuolar calcium-binding protein-related ; Vacuolar calcium-binding protein-related	323.31	7;4	6;3	1608700000	1398400000	920160000	1171000000	1891000000	1179400000	2074000000	961720000	1523600000	1615200000	1188900000	1147100000	1486000000	1914000000	1429700000	1670500000	1972700000	1514500000	2080400000	1794000000
AT1G12230.1;AT1G12230.2	Aldolase superfamily protein ; Aldolase superfamily protein	44.375	6;6	6;6	216010000	237030000	241120000	184220000	309160000	190070000	210220000	142770000	276450000	253250000	195690000	180470000	197460000	214010000	165210000	150450000	106790000	264010000	212520000	248390000
AT1G12240.1	Glycosyl hydrolases family 32 protein	119.15	11	9	382420000	589200000	327070000	339990000	457640000	244760000	600850000	295960000	588740000	679630000	380710000	287070000	403190000	575440000	337150000	600290000	546130000	305790000	426940000	211030000
AT1G12270.1	stress-inducible protein, putative	123.56	11;1;1	11;1;1	781850000	513990000	533480000	611810000	574780000	991250000	371930000	555780000	552130000	597460000	461680000	569140000	710280000	489840000	399730000	476860000	311930000	730730000	484470000	776170000
AT1G12310.1	Calcium-binding EF-hand family protein	167.69	7	4	794820000	1019800000	784780000	777890000	242890000	957090000	1048700000	657120000	960440000	771800000	740340000	712300000	744960000	423880000	504710000	714590000	600220000	844230000	607170000	513570000
AT1G12350.1	4-phospho-panto-thenoylcysteine synthetase	4.614	1	1	0	0	0	0	0	0	0	0	0	0	0	0	0	0	0	0	0	0	4483700	0
AT1G12360.1	Sec1/munc18-like (SM) proteins superfamily	1.7248	1	1	0	0	0	0	0	0	0	0	0	0	0	0	0	0	0	0	4769800	0	0	0
AT1G12470.1	zinc ion binding	8.9669	3	3	36350000	37742000	37273000	41441000	32310000	29166000	34673000	0	0	37877000	0	34022000	44404000	35661000	34517000	32196000	0	39474000	0	0
AT1G12660.1	Predicted to encode a PR (pathogenesis-related) protein. Belongs to the plant thionin (PR-13) family with the following members: At1g66100, At5g36910, At1g72260, At2g15010, At1g12663, At1g12660.	-2	1	1	0	0	0	0	0	0	0	0	0	0	0	0	0	0	0	0	0	0	0	66437000
AT1G12840.1	vacuolar ATP synthase subunit C (VATC) / V-ATPase C subunit / vacuolar proton pump C subunit (DET3)	290.07	13	13	1269200000	1390300000	1378000000	1365300000	1369300000	1310700000	1309100000	1028200000	1390400000	1428500000	1392400000	1004400000	1120800000	813670000	1137100000	1150100000	1135400000	1459000000	1312300000	1354400000
AT1G12920.1;AT3G26618.1	eukaryotic release factor 1-2 ; eukaryotic release factor 1-3	25.167	6;6	5;5	276750000	281220000	235900000	299160000	511960000	495920000	571960000	398130000	177870000	190120000	265270000	316780000	142390000	426370000	513660000	376360000	286930000	312820000	271480000	399970000
AT1G12930.1	ARM repeat superfamily protein	8.4851	2	2	9112100	8685200	6850200	13023000	9192700	0	0	6269300	8653000	9707200	6433100	8196400	7386900	7870900	6441900	0	0	7427700	0	7236100
AT1G13020.1	eukaryotic initiation factor 4B2	3.7116	2	2	0	0	0	0	0	0	0	0	0	0	0	0	0	0	0	92925000	0	0	0	0
AT1G13060.1;AT1G13060.2;AT3G26340.1	20S proteasome beta subunit E1 ; 20S proteasome beta subunit E1 ; N-terminal nucleophile aminohydrolases (Ntn hydrolases) superfamily protein	170.59	8;7;5	8;7;5	477060000	468770000	438640000	370290000	294640000	621180000	440210000	439430000	214830000	420800000	594190000	413910000	286450000	528940000	406430000	287430000	539300000	245490000	361220000	280870000
AT1G13280.1	allene oxide cyclase 4	9.8522	2	2	0	0	0	0	0	0	0	0	0	0	0	0	0	0	0	78952000	0	0	0	0
AT1G13320.2;AT1G13320.3;AT1G13320.1	protein phosphatase 2A subunit A3 ; protein phosphatase 2A subunit A3 ; protein phosphatase 2A subunit A3	25.76	11;11;11	6;6;6	178200000	155840000	153600000	207670000	175240000	116420000	182030000	111470000	206760000	193090000	158470000	157510000	158520000	164280000	138850000	169480000	103750000	166360000	92995000	149340000
AT1G13370.1;AT1G19890.1	Histone superfamily protein ; male-gamete-specific histone H3	48.76	2;2	0;0	317490000	598650000	535660000	499690000	333870000	194540000	298200000	219920000	401000000	345790000	369260000	358590000	464860000	359250000	339560000	229570000	484470000	341300000	176460000	673660000
AT1G13440.1;AT1G13440.2	glyceraldehyde-3-phosphate dehydrogenase C2 ; glyceraldehyde-3-phosphate dehydrogenase C2	32.915	14;11	1;1	68464000	64644000	123350000	0	0	34185000	136220000	30957000	106500000	72050000	0	45150000	46270000	57283000	53644000	32797000	49351000	51474000	52382000	57012000
AT1G13560.1;AT3G25585.4;AT3G25585.2;AT3G25585.1	aminoalcoholphosphotransferase 1 ; aminoalcoholphosphotransferase ; aminoalcoholphosphotransferase ; aminoalcoholphosphotransferase	7.3697	3;2;2;2;1;1	3;2;2;2;1;1	0	0	0	0	0	0	137910000	171830000	0	0	139520000	0	0	0	0	0	0	132100000	0	0
AT1G13690.1	ATPase E1	35.102	2	2	0	0	0	0	0	0	0	43644000	122600000	0	0	0	0	0	0	15406000	0	0	46613000	49720000
AT1G13730.1	Nuclear transport factor 2 (NTF2) family protein with RNA binding (RRM-RBD-RNP motifs) domain	20.485	3	3	0	0	0	0	0	0	0	0	0	0	0	0	0	0	0	0	0	0	35839000	0
AT1G13950.1	eukaryotic elongation factor 5A-1	19.133	4	1	0	0	0	0	0	0	0	0	0	0	0	121870000	104350000	29525000	0	0	0	0	0	0
AT1G13980.2;AT1G13980.1	sec7 domain-containing protein ; sec7 domain-containing protein	75.015	6;6	6;6	45200000	38223000	37409000	46975000	35750000	28919000	40234000	28632000	43590000	49542000	32963000	31465000	48228000	43628000	26269000	29627000	0	40072000	0	31442000
AT1G14000.1	VH1-interacting kinase	10.735	2	2	0	0	0	0	0	0	0	0	0	0	0	0	0	0	0	0	0	0	0	45985000
AT1G14170.2;AT1G14170.1;AT1G14170.3	RNA-binding KH domain-containing protein ; RNA-binding KH domain-containing protein ; RNA-binding KH domain-containing protein	2.1971	1;1;1	1;1;1	0	0	0	0	0	0	0	0	0	0	0	0	0	0	0	0	0	18902000	0	0
AT1G14300.1;AT1G14300.2	ARM repeat superfamily protein ; ARM repeat superfamily protein	13.032	2;1	2;1	0	0	0	0	0	0	0	0	0	0	0	0	0	0	0	0	0	0	0	4332000
AT1G14320.1;AT1G14320.2	Ribosomal protein L16p/L10e family protein ; Ribosomal protein L16p/L10e family protein	31.227	9;7	2;2	683400000	1092800000	762030000	451040000	700730000	926060000	709370000	3472600000	3001400000	1074100000	2780100000	487710000	573380000	180560000	1459100000	388810000	619830000	1006500000	3838700000	0
AT1G14360.1	UDP-galactose transporter 3	60.637	1	1	0	0	0	0	0	0	0	0	0	0	0	0	0	0	0	0	0	0	0	34198000
AT1G14570.4;AT1G14570.3;AT1G14570.2;AT1G14570.1	UBX domain-containing protein ; UBX domain-containing protein ; UBX domain-containing protein ; UBX domain-containing protein	10.633	2;2;2;2	2;2;2;2	0	0	0	0	0	0	0	0	0	0	0	0	0	0	0	0	0	0	48445000	0
AT1G14610.1	valyl-tRNA synthetase / valine--tRNA ligase (VALRS)	220.87	18	18	991360000	869220000	1043200000	1062700000	939700000	1047100000	1277800000	764100000	765140000	1011500000	837390000	868580000	1048800000	1483800000	844800000	938040000	1029500000	1163100000	752480000	899820000
AT1G14620.1	decoy	19.04	1	1	0	0	0	0	0	0	0	0	0	0	0	0	0	0	0	0	0	0	0	32438000
AT1G14650.2;AT1G14650.1	SWAP (Suppressor-of-White-APricot)/surp domain-containing protein / ubiquitin family protein ; SWAP (Suppressor-of-White-APricot)/surp domain-containing protein / ubiquitin family protein	3.9251	1;1	1;1	0	0	0	0	0	0	0	0	0	0	0	0	0	0	7569300	0	0	0	0	0
AT1G14670.1	Endomembrane protein 70 protein family	62.739	10;2	4;0	445740000	276410000	412450000	319450000	711240000	652570000	703090000	643350000	369480000	368860000	465200000	416510000	459390000	408200000	560470000	688690000	502250000	608250000	405320000	434830000
AT1G14710.2;AT1G14710.1	hydroxyproline-rich glycoprotein family protein ; hydroxyproline-rich glycoprotein family protein	23.567	2;2	2;2	28767000	0	0	0	0	32190000	0	28112000	38102000	39953000	0	30271000	31620000	21141000	33285000	0	26837000	0	0	43872000
AT1G14810.1	semialdehyde dehydrogenase family protein	156.59	9	9	291940000	357900000	249520000	378080000	603400000	389350000	357600000	346470000	126640000	226510000	227900000	404340000	300000000	501520000	504370000	664010000	559450000	318820000	268740000	382930000
AT1G14830.1	DYNAMIN-like 1C	68.487	15;1;1;1;1	14;1;1;1;1	393570000	391620000	373490000	517800000	605860000	599910000	516740000	461500000	353450000	313580000	382730000	544240000	371210000	440820000	583190000	575080000	539160000	483570000	466100000	511290000
AT1G14840.2;AT1G14840.1;AT1G68060.1;AT1G24764.1;AT2G01750.1;AT2G01750.2	microtubule-associated proteins 70-4 ; microtubule-associated proteins 70-4 ; microtubule-associated proteins 70-1 ; microtubule-associated proteins 70-2 ; microtubule-associated proteins 70-3 ; microtubule-associated proteins 70-3	3.2933	2;2;2;2;1;1	2;2;2;2;1;1	0	0	0	0	0	0	0	0	0	0	0	0	0	0	0	0	0	0	10145000	0
AT1G14850.1	nucleoporin 155	15.76	6	6	156790000	113240000	144200000	166700000	291070000	154110000	178190000	131230000	89024000	105910000	110540000	148660000	146260000	188380000	163640000	137080000	138180000	229780000	0	0
AT1G14980.1	chaperonin 10	59.185	4	4	1511700000	780980000	842980000	934820000	1396800000	674810000	1549300000	799700000	1079500000	497980000	686820000	917660000	843890000	2039200000	850930000	1204100000	873230000	993590000	800710000	1331400000
AT1G15130.1	Endosomal targeting BRO1-like domain-containing protein	2.4519	1	1	0	0	0	0	0	0	0	0	0	0	0	0	0	0	0	0	0	0	44788000	0
AT1G15210.1	pleiotropic drug resistance 7	48.148	10	6	148070000	117330000	86386000	148430000	250570000	198540000	357420000	320890000	146210000	143270000	197790000	155820000	138110000	155670000	158000000	126150000	155830000	195530000	91591000	91039000
AT3G16080.1;AT1G52300.1;AT1G15250.1	Zinc-binding ribosomal protein family protein ; Zinc-binding ribosomal protein family protein ; Zinc-binding ribosomal protein family protein	10.605	3;3;3	3;3;3	0	0	0	0	0	0	0	0	472730000	217480000	613370000	303980000	0	0	2207800000	0	0	0	969180000	243090000
AT1G15270.1	Translation machinery associated TMA7	8.2518	1	1	0	0	0	0	0	0	0	0	0	0	0	0	0	0	0	0	0	0	0	194210000
AT1G15390.1	peptide deformylase 1A	3.4092	2	2	0	0	0	0	0	0	0	0	0	0	0	0	0	0	0	0	0	0	0	25823000
AT1G15420.1	CONTAINS InterPro DOMAIN/s: Small-subunit processome, Utp12 (InterPro:IPR007148); Has 764 Blast hits to 656 proteins in 193 species: Archae - 0; Bacteria - 42; Metazoa - 237; Fungi - 154; Plants - 85; Viruses - 23; Other Eukaryotes - 223 (source: NCBI BLi	8.3608	1	1	0	0	0	0	0	0	0	0	0	0	0	0	0	0	0	0	0	18906000	0	0
AT1G15500.1;AT1G80300.1	TLC ATP/ADP transporter ; nucleotide transporter 1	91.437	3;2	3;2	101790000	65042000	79964000	130620000	166550000	175790000	169090000	130290000	72862000	76075000	77040000	129520000	124660000	191020000	119730000	133740000	128290000	158070000	76215000	168390000
AT1G15690.1;AT1G15690.2	Inorganic H pyrophosphatase family protein ; Inorganic H pyrophosphatase family protein	151.64	10;5	10;5	1439500000	1114000000	1150200000	1277000000	1640300000	2310500000	1824000000	2220200000	1885200000	996570000	1504700000	1905800000	1845500000	785270000	1074000000	2053900000	1383500000	1578300000	1332600000	2238700000
AT1G15750.4;AT1G15750.3;AT1G15750.2;AT1G15750.1;AT1G80490.1;AT1G80490.2	Transducin family protein / WD-40 repeat family protein ; Transducin family protein / WD-40 repeat family protein ; Transducin family protein / WD-40 repeat family protein ; Transducin family protein / WD-40 repeat family protein ; TOPLESS-related 1 ; TOP	87.943	6;6;6;6;4;4;2;1;1;1	6;6;6;6;4;4;2;1;1;1	200680000	157560000	169260000	177010000	143120000	93123000	203830000	133800000	192170000	279030000	120310000	175760000	184040000	257100000	130920000	169090000	66683000	240860000	95661000	195530000
AT1G15780.1	unknown protein; BEST Arabidopsis thaliana protein match is: unknown protein (TAIR:AT2G10440.1); Has 103701 Blast hits to 43153 proteins in 1828 species: Archae - 30; Bacteria - 7385; Metazoa - 38639; Fungi - 11531; Plants - 7727; Viruses - 307; Other Euk	1.5782	1	1	0	0	0	0	0	0	0	0	0	0	0	0	0	0	0	0	0	34264000	0	0
AT1G15860.2;AT1G15860.1;AT1G15860.3	Domain of unknown function (DUF298) ; Domain of unknown function (DUF298) ; Domain of unknown function (DUF298)	4.4603	1;1;1	1;1;1	0	0	0	0	0	0	0	0	0	0	0	0	0	0	0	1554900	0	0	0	0
AT1G15930.2;AT1G15930.1	Ribosomal protein L7Ae/L30e/S12e/Gadd45 family protein ; Ribosomal protein L7Ae/L30e/S12e/Gadd45 family protein	167.36	7;7	5;5	2583000000	3019900000	1778500000	2614600000	3634400000	2230200000	3007100000	1507500000	1736300000	1593200000	1245200000	2648400000	2498800000	4454900000	2166100000	2367900000	2655100000	2071800000	2049600000	1870200000
AT1G15950.2;AT1G15950.1	cinnamoyl coa reductase 1 ; cinnamoyl coa reductase 1	3.7898	2;2	2;2	0	0	0	0	0	0	0	0	0	0	0	0	0	0	0	0	0	0	0	50786000
AT1G16030.1	heat shock protein 70B	1.7642	4	1	0	0	0	0	0	0	0	0	0	0	0	0	0	0	0	0	0	0	0	0
AT1G16190.1	Rad23 UV excision repair protein family	9.075	1	1	0	0	0	0	0	0	0	0	0	0	0	0	0	0	0	0	0	0	7630000	0
AT1G16300.1	glyceraldehyde-3-phosphate dehydrogenase of plastid 2	33.908	7	2	102590000	0	106260000	0	107950000	0	93071000	0	0	0	0	99652000	78937000	121330000	0	0	0	0	0	0
AT1G16340.3;AT1G16340.2;AT1G16340.1;AT1G16340.4;AT1G79500.5	Aldolase superfamily protein ; Aldolase superfamily protein ; Aldolase superfamily protein ; Aldolase superfamily protein ; Aldolase-type TIM barrel family protein	6.6656	4;4;4;4;2	2;2;2;2;0	174030000	0	0	327790000	0	321790000	0	0	0	0	0	0	0	70970000	0	301920000	132270000	223070000	120260000	0
AT1G16350.1	Aldolase-type TIM barrel family protein	23.533	5;1	5;1	294280000	262080000	295230000	264390000	409570000	460980000	387380000	306920000	294010000	221350000	306120000	341840000	248650000	401450000	373600000	367660000	398160000	312530000	205560000	314240000
AT1G16470.2;AT1G16470.1	proteasome subunit PAB1 ; proteasome subunit PAB1	97.034	12;12	1;1	526270000	527520000	714280000	538790000	597270000	507800000	798710000	506220000	647850000	662120000	630440000	516690000	372350000	926150000	663960000	434180000	667710000	518450000	557050000	402660000
AT1G16560.3;AT1G16560.2;AT1G16560.1	Per1-like family protein ; Per1-like family protein ; Per1-like family protein	1.6572	1;1;1	1;1;1	0	0	0	0	0	0	0	0	0	0	0	0	0	0	0	0	0	0	0	50706000
AT1G16820.2;AT1G16820.1	vacuolar ATP synthase catalytic subunit-related / V-ATPase-related / vacuolar proton pump-related ; vacuolar ATP synthase catalytic subunit-related / V-ATPase-related / vacuolar proton pump-related	38.526	1;1	1;1	0	575270000	683710000	0	0	0	0	0	0	748700000	447190000	607060000	0	1220000000	0	626610000	663340000	0	0	0
AT1G16870.1	mitochondrial 28S ribosomal protein S29-related	17.991	1	1	0	0	0	0	0	0	0	0	0	0	0	0	0	0	0	0	0	0	0	26224000
AT1G16890.2;AT1G16890.1;AT1G16890.3;AT1G78870.2	ubiquitin-conjugating enzyme 36 ; ubiquitin-conjugating enzyme 36 ; ubiquitin-conjugating enzyme 36 ; ubiquitin-conjugating enzyme 35	74.348	5;4;4;3;2;2	5;4;4;3;2;2	292780000	315580000	225690000	266920000	284740000	236900000	234180000	236800000	207240000	443760000	358190000	312120000	197290000	427730000	342060000	307740000	314010000	193340000	281410000	179340000
AT1G16920.1	RAB GTPase homolog A1B	36.733	10;2	6;1	355770000	334360000	381230000	361600000	848160000	527490000	696030000	463420000	327590000	357950000	424990000	425610000	357590000	474850000	310810000	345040000	0	452710000	546280000	465590000
AT1G17050.1	solanesyl diphosphate synthase 2	53.423	2	2	16419000	16269000	16058000	15255000	0	10473000	18988000	11388000	16485000	19628000	17838000	12933000	16735000	14780000	16297000	15133000	13392000	0	19650000	19466000
AT1G17070.1	GC-rich sequence DNA-binding factor-like protein with Tuftelin interacting domain	4.1102	2	2	16082000	0	9492100	13397000	9504300	0	0	0	0	0	0	6410700	7552500	0	0	7371500	0	15013000	0	0
AT1G17130.1;AT1G17130.2	Family of unknown function (DUF572) ; Family of unknown function (DUF572)	4.8569	1;1	1;1	0	0	0	0	0	0	0	0	0	0	0	0	0	0	0	0	0	8954400	0	0
AT1G17170.1	glutathione S-transferase TAU 24	18.834	6	5	58108000	78287000	95684000	95339000	71875000	62982000	257290000	202550000	155230000	77426000	201620000	139830000	0	79098000	207410000	86068000	0	146980000	0	66961000
AT1G17180.1	glutathione S-transferase TAU 25	43.931	7;1	6;1	786170000	475110000	917830000	729160000	988690000	559980000	1621800000	987530000	493880000	445240000	1157100000	810450000	571470000	1128300000	1535400000	792090000	1084300000	600640000	385210000	574600000
AT1G17190.1	glutathione S-transferase tau 26	99.621	4	4	0	171190000	0	129260000	138300000	137740000	223300000	85254000	137790000	199390000	142420000	131280000	0	128880000	134090000	183240000	112560000	134620000	154960000	141750000
AT1G17290.1	alanine aminotransferas	217.43	11;3;3;2	11;3;3;2	559980000	606200000	538320000	557380000	608730000	411600000	539290000	394630000	470020000	675670000	548820000	480720000	518970000	680600000	425790000	554880000	488330000	650070000	500840000	472160000
AT1G17370.2;AT1G17370.1;AT3G14100.1	oligouridylate binding protein 1B ; oligouridylate binding protein 1B ; RNA-binding (RRM/RBD/RNP motifs) family protein	5.047	3;3;2	2;2;1	84796000	0	0	0	0	0	224120000	0	0	0	0	0	142640000	0	0	0	0	168570000	0	0
AT1G17470.2;AT1G17470.1;AT1G72660.3;AT1G72660.2;AT1G72660.1	developmentally regulated G-protein 1 ; developmentally regulated G-protein 1 ; P-loop containing nucleoside triphosphate hydrolases superfamily protein ; P-loop containing nucleoside triphosphate hydrolases superfamily protein ; P-loop containing nucleos	12.96	4;4;2;2;2	4;4;2;2;2	27950000	0	0	0	0	0	87673000	65924000	68376000	0	0	124380000	100060000	78029000	0	132630000	0	0	0	0
AT1G17720.2;AT1G17720.1	Protein phosphatase 2A, regulatory subunit PR55 ; Protein phosphatase 2A, regulatory subunit PR55	6.4209	4;4	3;3	0	0	0	0	0	0	0	0	0	0	0	0	0	0	0	0	0	0	73586000	0
AT1G17745.1;AT1G17745.2	D-3-phosphoglycerate dehydrogenase ; D-3-phosphoglycerate dehydrogenase	92.562	10;10	9;9	169020000	242410000	264470000	213260000	170890000	205180000	339000000	219920000	239290000	292690000	374380000	236260000	175510000	317430000	287030000	190820000	209540000	202870000	236290000	337350000
AT1G17860.1	Kunitz family trypsin and protease inhibitor protein	77.679	2	2	92566000	237300000	99187000	139780000	127310000	122300000	121260000	50444000	141780000	303070000	104660000	119730000	115350000	133600000	78395000	88589000	141100000	106860000	225370000	0
AT1G17880.1	basic transcription factor 3	69.482	8	6	245640000	186540000	307960000	419760000	275820000	270810000	493740000	288290000	259630000	146860000	341020000	371320000	447050000	541170000	231640000	194570000	325370000	285160000	153740000	101130000
AT1G17890.3;AT1G17890.2;AT1G17890.1	NAD(P)-binding Rossmann-fold superfamily protein ; NAD(P)-binding Rossmann-fold superfamily protein ; NAD(P)-binding Rossmann-fold superfamily protein	116	6;6;6	5;5;5	315610000	421580000	441000000	324050000	420390000	391990000	460880000	331050000	435870000	402140000	516520000	367620000	430490000	659710000	376800000	420660000	384200000	303240000	371510000	264570000
AT1G73390.4;AT1G17940.1;AT1G73390.3;AT1G73390.2;AT1G73390.1	Endosomal targeting BRO1-like domain-containing protein ; Endosomal targeting BRO1-like domain-containing protein ; Endosomal targeting BRO1-like domain-containing protein ; Endosomal targeting BRO1-like domain-containing protein ; Endosomal targeting BRO	1.9879	1;1;1;1;1	1;1;1;1;1	0	0	0	0	0	0	0	0	0	0	0	0	0	0	0	0	0	50154000	0	0
AT1G18070.2;AT1G18070.1;AT1G18070.3	Translation elongation factor EF1A/initiation factor IF2gamma family protein ; Translation elongation factor EF1A/initiation factor IF2gamma family protein ; Translation elongation factor EF1A/initiation factor IF2gamma family protein	12.303	6;6;6	6;6;6	0	0	171030000	0	0	0	43799000	423890000	162390000	254380000	214220000	0	0	43801000	334710000	92138000	234350000	0	331530000	349800000
AT1G18080.1	Transducin/WD40 repeat-like superfamily protein	323.31	17	13	4875000000	4205100000	3920400000	4094600000	6891700000	5562400000	4723700000	4074000000	2176300000	4496200000	3474000000	4397100000	3545400000	8626200000	5076000000	4563000000	5119600000	4004800000	4226900000	5208000000
AT1G73670.1;AT1G18150.3;AT1G18150.2;AT1G18150.1	MAP kinase 15 ; Protein kinase superfamily protein ; Protein kinase superfamily protein ; Protein kinase superfamily protein	7.1176	1;1;1;1	1;1;1;1	0	0	0	0	0	0	0	0	0	0	0	0	0	3158900	0	0	0	0	0	0
AT1G18270.1;AT1G18270.2;AT1G18270.3	ketose-bisphosphate aldolase class-II family protein ; ketose-bisphosphate aldolase class-II family protein ; ketose-bisphosphate aldolase class-II family protein	47.341	9;9;8	9;9;8	0	0	62928000	0	56175000	49075000	0	0	0	73702000	0	0	55485000	0	0	63467000	0	91837000	0	0
AT1G18450.1	actin-related protein 4	20.736	2	2	0	0	34541000	0	48613000	0	0	0	51055000	50785000	0	34552000	0	0	40494000	0	0	0	0	0
AT1G18500.1	methylthioalkylmalate synthase-like 4	116.24	7	3	99986000	73354000	89882000	127350000	105150000	88422000	132980000	58167000	93359000	111570000	84309000	108290000	143830000	120470000	98671000	91901000	124630000	225440000	113510000	85342000
AT1G18540.1	Ribosomal protein L6 family protein	8.251	11	4	964740000	819100000	823190000	1117100000	1969900000	904900000	1875200000	756040000	659790000	587110000	722990000	910480000	879870000	1054200000	730890000	1289600000	1060900000	937040000	539680000	854750000
AT1G18630.1	glycine-rich RNA-binding protein 6	1.8521	2	2	0	0	0	0	0	0	0	0	0	0	0	0	0	0	47400000	0	0	0	0	0
AT1G18800.1	NAP1-related protein 2	42.168	7	4	105700000	92935000	99428000	116700000	114650000	49384000	96548000	85791000	81804000	143330000	98520000	109380000	143080000	262520000	82243000	78993000	0	104730000	64600000	92198000
AT1G18850.1	unknown protein; FUNCTIONS IN: molecular_function unknown; INVOLVED IN: biological_process unknown; LOCATED IN: nucleolus; EXPRESSED IN: 22 plant structures; EXPRESSED DURING: 13 growth stages; Has 40 Blast hits to 40 proteins in 13 species: Archae - 0; B	5.4184	1	1	0	0	0	0	0	0	0	0	0	0	0	0	0	0	0	0	0	0	0	20255000
AT1G19120.1	Small nuclear ribonucleoprotein family protein	19.078	1	1	0	0	0	0	0	0	0	0	0	0	0	0	0	0	0	0	0	0	0	10770000
AT1G19130.1	CONTAINS InterPro DOMAIN/s: Protein of unknown function DUF985 (InterPro:IPR009327), RmlC-like jelly roll fold (InterPro:IPR014710); Has 1465 Blast hits to 1465 proteins in 584 species: Archae - 10; Bacteria - 1038; Metazoa - 19; Fungi - 43; Plants - 51;	8.448	6	6	0	0	0	0	0	0	0	0	0	0	0	0	0	0	0	168860000	0	0	0	0
AT1G19140.1;AT1G19140.2	FUNCTIONS IN: molecular_function unknown; INVOLVED IN: ubiquinone biosynthetic process; LOCATED IN: mitochondrion; EXPRESSED IN: 24 plant structures; EXPRESSED DURING: 15 growth stages; CONTAINS InterPro DOMAIN/s: COQ9 (InterPro:IPR013718), Ubiquinone bio	110.82	3;3	3;3	0	0	0	0	23449000	0	0	0	0	0	0	0	0	0	0	0	0	51541000	0	0
AT1G19360.1	Nucleotide-diphospho-sugar transferase family protein	31.355	4	4	114040000	92485000	95707000	95057000	84543000	92968000	60898000	80768000	115220000	119350000	92924000	78382000	83355000	125740000	136980000	109320000	56566000	103100000	111890000	116400000
AT1G19520.1;AT1G19520.2	pentatricopeptide (PPR) repeat-containing protein ; pentatricopeptide (PPR) repeat-containing protein	48.41	4;3	4;3	42614000	38413000	38551000	35404000	34947000	27610000	36175000	28814000	29296000	54790000	27650000	36698000	48982000	51210000	24483000	30355000	25228000	55202000	19461000	44703000
AT1G19570.2;AT1G19570.1;AT1G19550.1	dehydroascorbate reductase ; dehydroascorbate reductase ; Glutathione S-transferase family protein	169.08	4;4;2	4;4;2	50644000	74349000	52351000	0	0	0	61442000	0	70575000	65224000	66998000	94515000	65028000	0	60694000	123100000	45510000	52283000	65091000	0
AT1G19580.1	gamma carbonic anhydrase 1	56.835	1	1	0	0	0	0	0	0	0	0	0	0	0	0	0	0	0	0	0	0	26960000	0
AT1G19870.1	IQ-domain 32	171.38	5	4	121650000	101480000	117030000	194880000	73694000	0	34589000	112980000	95979000	134730000	80544000	119430000	119900000	112850000	102650000	96078000	0	224900000	74107000	0
AT1G19880.1	Regulator of chromosome condensation (RCC1) family protein	42.506	1	1	0	0	0	0	0	0	0	44168000	27087000	0	124990000	0	0	0	18034000	0	0	10773000	0	0
AT4G38920.1;AT4G34720.1;AT2G16510.1;AT1G19910.1;AT1G75630.1;AT1G75630.2	vacuolar-type H(+)-ATPase C3 ; ATPase, F0/V0 complex, subunit C protein ; ATPase, F0/V0 complex, subunit C protein ; ATPase, F0/V0 complex, subunit C protein ; vacuolar H+-pumping ATPase 16 kDa proteolipid subunit 4 ; vacuolar H+-pumping ATPase 16 kDa pro	3.6446	1;1;1;1;1;1	1;1;1;1;1;1	0	0	0	0	0	0	0	0	0	0	0	0	0	0	0	0	0	0	0	49435000
AT1G19920.1	Pseudouridine synthase/archaeosine transglycosylase-like family protein	9.0992	3	3	0	0	0	0	0	0	0	0	0	0	0	0	0	0	0	0	0	99554000	0	0
AT1G20010.1	tubulin beta-5 chain	46.827	16	3	182860000	199060000	204820000	259800000	360630000	270170000	325440000	266590000	269870000	225510000	250840000	173610000	184720000	300340000	348470000	309630000	394510000	254790000	264060000	299460000
AT1G20050.1	C-8,7 sterol isomerase	12.19	2	2	0	0	0	0	0	0	0	0	0	0	0	0	0	0	0	0	0	117940000	0	0
AT1G20090.1;AT1G75840.1;AT4G35020.3;AT4G35020.2;AT4G35020.1	RHO-related protein from plants 2 ; RAC-like GTP binding protein 5 ; RAC-like 3 ; RAC-like 3 ; RAC-like 3	3.309	2;2;1;1;1	2;2;1;1;1	0	0	0	0	0	0	0	0	0	0	0	0	0	0	0	0	0	0	0	67827000
AT1G20110.1	RING/FYVE/PHD zinc finger superfamily protein	9.0476	2	2	0	0	0	0	0	0	0	0	0	0	0	0	0	0	0	0	0	0	73532000	0
AT2G25700.1;AT1G20140.1	SKP1-like 3 ; SKP1-like 4	1.8889	1;1	1;1	0	0	0	0	0	0	0	0	0	0	0	0	0	0	0	0	0	0	0	728910
AT1G20200.1	PAM domain (PCI/PINT associated module) protein	281.11	13	4	652310000	697630000	705350000	858480000	693490000	993540000	899150000	712220000	652320000	580930000	825030000	885900000	726790000	916270000	728960000	538950000	758620000	772410000	558350000	784670000
AT1G20220.1	Alba DNA/RNA-binding protein	67.438	5	4	354730000	196670000	0	404460000	399610000	405360000	383410000	282840000	213440000	238710000	151880000	293760000	253050000	405100000	285990000	218520000	232080000	345330000	203030000	320200000
AT1G76030.1;AT1G20260.1	ATPase, V1 complex, subunit B protein ; ATPase, V1 complex, subunit B protein	9.4466	18;18	3;3	507790000	662030000	539580000	589380000	199900000	319160000	505130000	415960000	732450000	636660000	432910000	355400000	438750000	0	436140000	664020000	414380000	365200000	561090000	376640000
AT1G20330.1	sterol methyltransferase 2	77.622	10	10	380390000	245330000	288950000	282770000	325890000	448640000	551130000	330140000	206480000	219000000	290350000	281120000	351940000	366960000	427130000	408210000	332720000	427260000	390920000	323120000
AT1G20440.1	cold-regulated 47	323.31	9	8	3219300000	3626500000	2743300000	3174400000	6094100000	4851700000	6703600000	4493500000	3774100000	3632300000	3797700000	4049200000	4304000000	3381600000	4769500000	6797200000	3160100000	3714500000	4452800000	4589000000
AT1G20450.2;AT1G20450.1	Dehydrin family protein ; Dehydrin family protein	178.48	8;8	8;8	1587400000	1828800000	1652600000	1132400000	247000000	2383100000	295140000	1951000000	2103900000	1536000000	1825500000	1703400000	1261900000	420060000	1580400000	1462400000	856660000	1878100000	1988400000	2037800000
AT1G20510.1	OPC-8:0 CoA ligase1	2.4076	1	1	0	0	0	0	0	0	0	0	0	0	0	0	0	0	0	0	0	16473000	0	0
AT1G20560.2;AT1G20560.1	acyl activating enzyme 1 ; acyl activating enzyme 1	2.3219	1;1	1;1	0	0	0	0	0	0	0	0	0	0	0	0	0	0	0	0	0	0	12287000	0
AT1G20575.1	Nucleotide-diphospho-sugar transferases superfamily protein	16.582	1	1	0	0	0	0	0	0	0	0	0	0	0	0	0	0	6891900	0	0	0	0	0
AT1G20630.1	catalase 1	6.0054	4	1	0	0	0	0	0	0	0	0	0	0	0	0	0	0	0	10548000	0	0	0	0
AT1G20696.3;AT1G20696.1;AT1G20693.2;AT1G20693.3;AT1G20693.1	high mobility group B3 ; high mobility group B3 ; high mobility group B2 ; high mobility group B2 ; high mobility group B2	2.061	1;1;1;1;1	1;1;1;1;1	0	0	0	0	0	0	0	0	0	0	0	0	0	0	0	0	0	0	26907000	0
AT1G20840.1	tonoplast monosaccharide transporter1	20.674	6	6	67069000	93565000	0	82307000	60399000	59561000	0	140470000	145460000	83398000	105860000	101950000	68600000	0	82740000	102120000	0	73031000	81189000	66104000
AT1G20850.1;AT4G35350.1	xylem cysteine peptidase 2 ; xylem cysteine peptidase 1	10.725	2;1	2;1	0	0	0	0	0	0	0	0	96334000	0	102300000	0	0	0	57336000	0	52177000	0	90073000	0
AT1G20950.1	Phosphofructokinase family protein	323.31	28	19	2927300000	2854900000	2968200000	2733800000	4468000000	3778800000	4725300000	3153700000	2743900000	2758700000	2634000000	3145400000	2832400000	4802500000	3958500000	3493100000	3932100000	3253600000	2572100000	3355500000
AT1G20960.2;AT1G20960.1	U5 small nuclear ribonucleoprotein helicase, putative ; U5 small nuclear ribonucleoprotein helicase, putative	81.472	17;17	14;14	374790000	314260000	277220000	457250000	364920000	333380000	280970000	274330000	325840000	332800000	422750000	335810000	311860000	434330000	321160000	250220000	272920000	341530000	170710000	322810000
AT1G20970.1	FUNCTIONS IN: molecular_function unknown; INVOLVED IN: biological_process unknown; LOCATED IN: plasma membrane, vacuole; EXPRESSED IN: guard cell, cultured cell; BEST Arabidopsis thaliana protein match is: proton pump interactor 1 (TAIR:AT4G27500.1); Has	44.454	6	6	252910000	163820000	178870000	128580000	0	0	0	256370000	381980000	190920000	203430000	177360000	151310000	34367000	67095000	77839000	136450000	120760000	194390000	104810000
AT1G21080.1;AT1G21080.3;AT1G21080.2	DNAJ heat shock N-terminal domain-containing protein ; DNAJ heat shock N-terminal domain-containing protein ; DNAJ heat shock N-terminal domain-containing protein	17.952	5;5;4	5;5;4	98490000	0	0	120030000	97988000	0	0	0	115490000	62183000	94436000	0	0	0	0	0	52858000	0	0	89354000
AT1G21120.1;AT1G21110.1;AT1G21130.2;AT1G21130.1;AT1G21100.1	O-methyltransferase family protein ; O-methyltransferase family protein ; O-methyltransferase family protein ; O-methyltransferase family protein ; O-methyltransferase family protein	2.4385	2;2;1;1;1	2;2;1;1;1	0	0	0	0	0	0	0	0	0	0	0	0	0	52557000	0	0	0	0	0	0
AT1G21170.1	Exocyst complex component SEC5	13.272	1	1	0	0	0	0	0	0	0	0	0	0	0	0	0	0	0	0	0	0	2133900	0
AT1G21190.1;AT1G76860.1	Small nuclear ribonucleoprotein family protein ; Small nuclear ribonucleoprotein family protein	1.8452	1;1	1;1	0	0	0	0	0	0	0	0	0	0	0	0	0	0	0	0	0	0	0	36583000
AT1G21380.1	Target of Myb protein 1	12.255	3;1	3;1	0	0	86331000	0	0	0	0	0	96157000	0	0	89280000	0	0	0	0	86236000	0	0	0
AT1G21630.1;AT1G21630.2	Calcium-binding EF hand family protein ; Calcium-binding EF hand family protein	5.5164	2;2	2;2	0	0	0	0	0	0	0	0	0	0	0	0	0	0	0	0	0	39983000	0	0
AT1G21660.1	Chaperone DnaJ-domain superfamily protein	2.3892	1	1	0	0	0	0	0	0	0	0	0	0	0	0	0	0	0	0	0	0	13945000	0
AT1G21720.1;AT1G77440.2;AT1G77440.1	proteasome beta subunit C1 ; 20S proteasome beta subunit C2 ; 20S proteasome beta subunit C2	91.649	6;5;5	6;5;5	137430000	253460000	275300000	230890000	197880000	202780000	256300000	67536000	194900000	347110000	244750000	167870000	266480000	198720000	187610000	180640000	227930000	229500000	108560000	121180000
AT1G21750.1;AT1G21750.2	PDI-like 1-1 ; PDI-like 1-1	323.31	33;31	29;28	8079800000	8458900000	8187900000	6821400000	6111500000	5648800000	9538900000	6094000000	7109300000	8232500000	7819200000	6692500000	6773300000	9082500000	6632600000	7173200000	6469700000	7439000000	8563000000	8908100000
AT1G21880.1;AT1G21880.2;AT1G77630.1	lysm domain GPI-anchored protein 1 precursor ; lysm domain GPI-anchored protein 1 precursor ; Peptidoglycan-binding LysM domain-containing protein	46.465	2;2;1	2;2;1	65817000	72277000	0	0	0	0	0	67121000	0	0	76922000	0	0	108590000	0	0	51054000	0	80120000	100850000
AT1G22060.1	LOCATED IN: vacuole; EXPRESSED IN: 23 plant structures; EXPRESSED DURING: 13 growth stages; BEST Arabidopsis thaliana protein match is: FBD, F-box and Leucine Rich Repeat domains containing protein (TAIR:AT1G22000.1); Has 84739 Blast hits to 38714 protein	3.4314	2	2	0	0	0	0	0	0	0	0	0	0	0	0	0	0	0	0	45561000	0	0	0
AT1G78000.2;AT1G78000.1;AT1G22150.1	sulfate transporter 1;2 ; sulfate transporter 1;2 ; sulfate transporter 1;3	19.438	1;1;1	1;1;1	0	0	0	0	0	0	0	0	0	0	0	0	0	0	0	0	0	17215000	0	0
AT1G22200.2;AT1G22200.1	Endoplasmic reticulum vesicle transporter protein ; Endoplasmic reticulum vesicle transporter protein	11.974	2;2	2;2	0	0	31374000	35414000	0	0	29653000	44971000	35636000	0	0	0	0	0	28027000	0	0	0	0	28630000
AT1G22270.1	Trm112p-like protein	9.0132	2	2	0	0	0	0	0	0	0	0	0	0	0	0	0	0	0	0	0	128410000	0	0
AT1G22280.1;AT1G22280.3	phytochrome-associated protein phosphatase type 2C ; phytochrome-associated protein phosphatase type 2C	2.6127	1;1	1;1	0	0	0	0	0	0	0	0	0	0	0	0	0	0	0	0	0	41090000	0	0
AT1G22300.2;AT1G22300.1;AT1G22300.3	general regulatory factor 10 ; general regulatory factor 10 ; general regulatory factor 10	320.64	12;12;11;3;3	11;11;10;2;2	4208100000	3917200000	4202300000	3671300000	4434100000	2954100000	5709300000	3659400000	3916600000	3189400000	3855000000	3517000000	3463200000	6345900000	3550400000	5176700000	2455100000	4519900000	3729900000	3702000000
AT1G78260.2;AT1G78260.1;AT1G22330.1	RNA-binding (RRM/RBD/RNP motifs) family protein ; RNA-binding (RRM/RBD/RNP motifs) family protein ; RNA-binding (RRM/RBD/RNP motifs) family protein	1.8459	1;1;1	1;1;1	0	0	0	0	0	0	0	0	0	0	0	0	0	0	0	0	0	0	0	52239000
AT1G22360.1;AT1G22360.2	UDP-glucosyl transferase 85A2 ; UDP-glucosyl transferase 85A2	2.9321	2;1	1;1	0	0	0	0	0	0	0	0	68320000	0	0	0	0	0	0	0	0	0	0	0
AT1G22400.1	UDP-Glycosyltransferase superfamily protein	3.1539	2	1	0	0	0	0	0	0	0	0	0	0	0	0	0	0	0	0	0	0	0	4260400
AT1G22410.1	Class-II DAHP synthetase family protein	307.13	12	9	846240000	846920000	1042900000	887500000	1121500000	823780000	1552000000	963140000	703900000	621610000	806490000	1100200000	932620000	1081100000	1155200000	1214900000	957410000	846710000	856880000	1104000000
AT1G22440.1	Zinc-binding alcohol dehydrogenase family protein	10.489	2	2	14394000	16518000	0	13933000	11937000	0	0	0	20057000	31285000	19960000	14859000	0	16298000	15332000	16396000	8540200	0	11110000	17518000
AT1G22450.1	cytochrome C oxidase 6B	157.27	6;1;1	6;1;1	930510000	640280000	781290000	447110000	1456200000	772200000	1734100000	1077000000	697490000	467540000	929620000	1015600000	826940000	1262300000	1095900000	1001900000	861880000	789890000	1003800000	1157800000
AT1G22520.1;AT1G22520.2	Domain of unknown function (DUF543) ; Domain of unknown function (DUF543)	1.9618	1;1	1;1	0	0	0	0	0	0	0	0	0	0	0	0	0	0	0	0	0	0	0	21784000
AT1G22530.1	PATELLIN 2	318.18	30	28	2050700000	2509500000	1815400000	1862900000	3020300000	2506300000	2744700000	2359800000	2381600000	2905700000	2081300000	2135000000	2014100000	2725500000	2280300000	3630100000	2451200000	2696300000	3286300000	2576300000
AT1G22630.1	unknown protein; LOCATED IN: chloroplast; EXPRESSED IN: 21 plant structures; EXPRESSED DURING: 13 growth stages; Has 87 Blast hits to 86 proteins in 34 species: Archae - 0; Bacteria - 13; Metazoa - 27; Fungi - 0; Plants - 40; Viruses - 0; Other Eukaryotes	2.2639	1	1	0	0	0	0	0	0	0	0	0	0	0	0	0	0	0	0	0	0	0	32557000
AT1G22770.1	gigantea protein (GI)	4.684	1	1	0	0	0	0	0	0	0	0	0	0	0	0	0	0	0	0	5411100	0	0	0
AT4G09800.1;AT1G34030.1;AT1G22780.1	S18 ribosomal protein ; Ribosomal protein S13/S18 family ; Ribosomal protein S13/S18 family	143.15	7;7;7	7;7;7	4521300000	5120900000	6993200000	4563100000	5228800000	4101300000	8933900000	3717500000	3632700000	3302400000	4292400000	4478300000	5329900000	7451600000	5448700000	3903000000	5345800000	3191500000	1303400000	3472100000
AT1G22840.2;AT1G22840.1	CYTOCHROME C-1 ; CYTOCHROME C-1	4.1381	1;1	1;1	0	0	0	0	0	0	0	0	0	0	0	0	0	0	0	0	0	0	45785000	0
AT1G71410.1;AT1G22870.1	ARM repeat superfamily protein ; Protein kinase family protein with ARM repeat domain	13.342	1;1	1;1	0	0	0	0	0	0	0	0	0	0	0	0	0	0	0	0	0	0	0	24861000
AT1G22880.2;AT1G22880.1	cellulase 5 ; cellulase 5	2.1006	1;1	1;1	0	0	0	0	0	0	0	0	0	0	0	0	0	0	0	0	0	0	0	71017000
AT1G22920.2;AT1G22920.1	COP9 signalosome 5A ; COP9 signalosome 5A	16.85	4;4;1	4;4;1	0	112850000	0	0	0	0	0	0	0	0	119870000	0	0	117420000	0	0	0	0	106590000	0
AT1G22930.2;AT1G22930.1	T-complex protein 11 ; T-complex protein 11	3.5561	2;2	2;2	0	0	0	0	0	0	0	0	18055000	0	18147000	0	0	0	0	0	0	0	0	0
AT1G22970.1	unknown protein; BEST Arabidopsis thaliana protein match is: unknown protein (TAIR:AT1G71150.1); Has 134 Blast hits to 132 proteins in 48 species: Archae - 0; Bacteria - 0; Metazoa - 66; Fungi - 10; Plants - 48; Viruses - 0; Other Eukaryotes - 10 (source:	2.0993	1	1	0	0	0	0	0	0	0	0	0	0	0	0	0	0	0	0	0	0	0	35195000
AT1G23100.1	GroES-like family protein	5.07	2	2	0	0	0	96053000	0	0	0	0	0	0	0	0	0	0	0	108660000	0	0	0	0
AT1G23130.1	Polyketide cyclase/dehydrase and lipid transport superfamily protein	4.073	2	2	0	0	0	0	0	0	0	0	0	0	0	0	0	0	0	0	0	0	86648000	0
AT1G23170.2;AT1G23170.1	Protein of unknown function DUF2359, transmembrane ; Protein of unknown function DUF2359, transmembrane	6.8772	4;3	2;1	321650000	378600000	0	364750000	0	410810000	560780000	451940000	315180000	0	371210000	341700000	0	0	486680000	280320000	472900000	417590000	450570000	396510000
AT1G23190.1	Phosphoglucomutase/phosphomannomutase family protein	323.31	21	14	2743200000	2659200000	2678100000	2316700000	2601000000	2302900000	3838200000	2272000000	2895200000	3172300000	2901100000	2377900000	2665800000	3293500000	2671500000	3501600000	2428200000	2663000000	2517100000	2541900000
AT1G23260.1	MMS ZWEI homologue 1	1.9136	1	1	0	0	0	0	0	0	0	0	0	0	0	0	0	0	0	0	0	0	0	52552000
AT1G23280.1	MAK16 protein-related	11.281	2	2	0	0	0	0	0	0	0	0	0	0	0	0	0	0	0	0	0	0	0	47049000
AT1G70600.1;AT1G23290.1	Ribosomal protein L18e/L15 superfamily protein ; Ribosomal protein L18e/L15 superfamily protein	32.756	3;3	3;3	2894700000	2210000000	1835200000	3628900000	1560400000	2120200000	2520700000	2396700000	3429200000	1817100000	974220000	2390100000	1698800000	4484800000	2411200000	1909800000	2603600000	1958400000	1564400000	1864000000
AT1G23440.1	Peptidase C15, pyroglutamyl peptidase I-like	11.586	5;2	5;2	139830000	145560000	156470000	53705000	0	50178000	144920000	137300000	0	0	0	0	122710000	237110000	160440000	160600000	0	0	0	0
AT1G70490.3;AT1G70490.2;AT1G70490.1;AT1G23490.1	Ras-related small GTP-binding family protein ; Ras-related small GTP-binding family protein ; Ras-related small GTP-binding family protein ; ADP-ribosylation factor 1	57.277	8;8;8;8	1;1;1;1	0	0	0	0	0	0	0	0	0	0	0	0	0	0	0	0	0	0	144930000	0
AT1G23750.1	Nucleic acid-binding, OB-fold-like protein	13.678	2	2	0	0	0	0	95480000	0	38439000	0	0	152170000	0	159730000	247070000	0	125340000	139980000	103160000	144760000	169760000	156110000
AT1G23820.1;AT1G23820.2	spermidine synthase 1 ; spermidine synthase 1	323.31	11;9	8;6	938220000	1020600000	1064100000	862490000	1014400000	934080000	1178200000	845680000	1177000000	1119400000	1097200000	865900000	957540000	1682700000	836650000	796760000	1079200000	1483700000	927120000	1241300000
AT1G23900.2;AT1G23900.1	gamma-adaptin 1 ; gamma-adaptin 1	12.986	5;5;1	4;4;1	0	0	40625000	47171000	0	37766000	57031000	40290000	45436000	0	46845000	41449000	44008000	0	40019000	0	44819000	0	0	0
AT1G24050.1	RNA-processing, Lsm domain	38.489	4	4	0	56507000	86803000	81349000	73251000	0	104670000	44738000	45923000	0	0	53430000	56874000	67391000	56798000	49093000	0	0	0	0
AT1G24100.1	UDP-glucosyl transferase 74B1	14.282	2	2	0	62208000	0	31531000	0	0	0	0	0	0	0	0	0	0	60215000	0	0	0	0	0
AT1G24180.1	Thiamin diphosphate-binding fold (THDP-binding) superfamily protein	112.56	14	12	862110000	1252600000	1142900000	978860000	969910000	1088100000	1716500000	950650000	1024500000	1126800000	1056300000	1031800000	948260000	1377000000	1102400000	902860000	1043400000	996200000	1240200000	678950000
AT1G24280.1	glucose-6-phosphate dehydrogenase 3	29.248	13	3	40342000	0	66922000	0	0	0	0	60457000	57275000	81337000	57679000	61083000	64974000	74330000	81204000	74086000	0	51280000	0	75602000
AT1G24360.1	NAD(P)-binding Rossmann-fold superfamily protein	117.87	5	5	692900000	562390000	728060000	526250000	385430000	553290000	267440000	480310000	689490000	623240000	636110000	588850000	710860000	658070000	449400000	389590000	687340000	680330000	439020000	598080000
AT1G24460.2;AT1G24460.1	unknown protein; FUNCTIONS IN: molecular_function unknown; INVOLVED IN: biological_process unknown; LOCATED IN: cellular_component unknown; EXPRESSED IN: 22 plant structures; EXPRESSED DURING: 14 growth stages; BEST Arabidopsis thaliana protein match is:	11.726	2;2	2;2	0	0	0	0	0	0	0	0	0	31322000	0	0	0	0	0	0	0	0	0	0
AT1G24510.1;AT1G24510.2	TCP-1/cpn60 chaperonin family protein ; TCP-1/cpn60 chaperonin family protein	219.6	18;17;1	18;17;1	1158900000	1390700000	1449200000	1527500000	1725400000	1375500000	1620700000	1359800000	1918600000	1341600000	1691400000	1481600000	1541600000	1656900000	1327500000	1479500000	1489500000	1826500000	944220000	1588800000
AT1G25211.1;AT1G25150.1;AT1G25055.1;AT1G24881.1;AT1G24800.1	F-box family protein ; F-box family protein ; F-box family protein ; F-box family protein ; F-box family protein	2.3763	1;1;1;1;1	1;1;1;1;1	0	0	0	0	0	0	0	0	0	0	0	0	0	0	0	0	0	16860000	0	0
AT1G25230.1	Calcineurin-like metallo-phosphoesterase superfamily protein	3.8627	2	2	0	0	0	0	0	0	0	0	0	0	0	82387000	0	0	0	0	0	0	0	0
AT1G25260.1	Ribosomal protein L10 family protein	-2	1	1	0	0	0	0	0	0	0	0	0	0	0	0	0	0	0	0	0	14941000	0	0
AT1G25350.1;AT1G25350.2	glutamine-tRNA ligase, putative / glutaminyl-tRNA synthetase, putative / GlnRS, putative ; glutamine-tRNA ligase, putative / glutaminyl-tRNA synthetase, putative / GlnRS, putative	134.2	15;15	15;15	228830000	300510000	282000000	285380000	285590000	301840000	285000000	283280000	261720000	433490000	182570000	341620000	337990000	268840000	210150000	313990000	265080000	482470000	189970000	344880000
AT1G25490.1	ARM repeat superfamily protein	300.2	17	13	949680000	838030000	774050000	1110700000	856470000	715920000	989060000	634950000	1071500000	1276600000	1004100000	906920000	1121100000	1068800000	777500000	911450000	744870000	1157800000	512900000	1135700000
AT1G26090.1	P-loop containing nucleoside triphosphate hydrolases superfamily protein	1.759	1	1	0	0	0	0	0	0	0	0	0	0	0	0	0	0	0	0	0	0	169490000	0
AT1G26110.2;AT1G26110.1	decapping 5 ; decapping 5	76.349	6;6	6;6	0	0	0	104900000	0	110470000	116100000	73636000	71116000	68230000	77317000	111100000	0	117790000	0	0	167570000	70212000	70565000	0
AT1G26170.1	ARM repeat superfamily protein	26.865	2	2	19830000	17869000	17028000	17870000	15590000	13100000	18724000	9660900	29152000	24335000	17221000	19414000	18275000	21920000	13022000	14705000	12645000	21934000	0	17720000
AT1G26340.1	cytochrome B5 isoform A	27.622	2	2	0	0	0	0	0	0	0	0	0	0	0	0	0	0	0	0	0	97092000	0	0
AT1G26460.1	Tetratricopeptide repeat (TPR)-like superfamily protein	166.91	5	5	131060000	73019000	151250000	190230000	127790000	104970000	142430000	123810000	100560000	90449000	94324000	84679000	148290000	176680000	133400000	128160000	136000000	118850000	111270000	157280000
AT1G26550.1	FKBP-like peptidyl-prolyl cis-trans isomerase family protein	59.719	4	4	445100000	390110000	299090000	283560000	325510000	502900000	293640000	379480000	347510000	358630000	442860000	333590000	375250000	231170000	306850000	328580000	231970000	487580000	259780000	278020000
AT1G26630.1;AT1G26630.2	Eukaryotic translation initiation factor 5A-1 (eIF-5A 1) protein ; Eukaryotic translation initiation factor 5A-1 (eIF-5A 1) protein	323.31	9;7	7;5	8471400000	7339400000	7392100000	5363900000	7395800000	11185000000	7627500000	6041500000	7468400000	6811400000	7408800000	6474300000	6529100000	5175700000	5349800000	6205300000	4880200000	7896500000	7804600000	8695500000
AT1G26850.2;AT1G26850.1;AT1G26850.3	S-adenosyl-L-methionine-dependent methyltransferases superfamily protein ; S-adenosyl-L-methionine-dependent methyltransferases superfamily protein ; S-adenosyl-L-methionine-dependent methyltransferases superfamily protein	63.586	8;8;5	8;8;5	215070000	158060000	152710000	202180000	237080000	229300000	172770000	176620000	165990000	110670000	192160000	182210000	136590000	200690000	164190000	215510000	199890000	224490000	196310000	158770000
AT1G26880.1;AT1G26880.2	Ribosomal protein L34e superfamily protein ; Ribosomal protein L34e superfamily protein	2.3225	3;2	1;1	0	0	0	0	506690000	0	0	0	0	0	0	0	0	0	0	0	0	0	0	0
AT1G26910.1	Ribosomal protein L16p/L10e family protein	-2	9	1	0	0	0	0	0	0	0	0	0	0	0	0	0	0	0	0	0	0	0	21831000
AT1G27000.1	Protein of unknown function (DUF1664)	1.8044	1	1	0	0	0	0	0	0	0	0	0	0	0	0	0	0	0	0	0	0	0	0
AT1G27020.1	unknown protein; BEST Arabidopsis thaliana protein match is: unknown protein (TAIR:AT1G27030.1); Has 514 Blast hits to 514 proteins in 175 species: Archae - 0; Bacteria - 311; Metazoa - 0; Fungi - 0; Plants - 65; Viruses - 0; Other Eukaryotes - 138 (sourc	1.866	1	1	0	0	0	0	0	0	0	0	0	0	0	0	0	0	0	0	2428300	0	0	0
AT1G27090.1	glycine-rich protein	323.31	12	12	737160000	535960000	743450000	592740000	242140000	1057400000	388320000	625660000	743640000	748290000	637760000	978590000	845060000	473870000	486210000	499360000	601950000	969490000	757790000	813650000
AT1G27130.1	glutathione S-transferase tau 13	26.333	5	4	407480000	367180000	429010000	354480000	421160000	306550000	361630000	222710000	114380000	262670000	178850000	391970000	420790000	539730000	262490000	370780000	365920000	470620000	267970000	161770000
AT1G27140.1	glutathione S-transferase tau 14	9.5408	2	1	0	0	0	0	0	0	0	0	0	0	0	0	0	0	0	0	0	0	0	4336000
AT1G27310.1	nuclear transport factor 2A	21.153	2	2	286640000	0	249440000	157590000	102030000	254850000	58019000	0	591110000	316990000	119210000	197120000	0	151140000	0	77845000	0	273100000	738460000	532370000
AT1G27350.1;AT1G27330.1	Ribosome associated membrane protein RAMP4 ; Ribosome associated membrane protein RAMP4	5.7244	1;1	1;1	0	0	0	0	0	0	0	0	0	0	0	0	0	0	0	0	0	0	0	359050000
AT1G27390.1	translocase outer membrane 20-2	38.524	2	2	0	0	0	0	158100000	0	0	0	0	0	0	143670000	124020000	0	0	0	0	0	0	0
AT1G27400.1;AT1G67430.1;AT1G67430.2	Ribosomal protein L22p/L17e family protein ; Ribosomal protein L22p/L17e family protein ; Ribosomal protein L22p/L17e family protein	61.414	8;7;5	8;7;5	1460700000	1468800000	2289200000	1599300000	2791500000	1629000000	3022600000	2150400000	2560200000	1584900000	1614700000	2029000000	2180300000	2023000000	2119000000	2281100000	2717800000	1172800000	1455700000	1677300000
AT1G27435.1	unknown protein; Has 16 Blast hits to 16 proteins in 8 species: Archae - 0; Bacteria - 0; Metazoa - 0; Fungi - 0; Plants - 16; Viruses - 0; Other Eukaryotes - 0 (source: NCBI BLink).	48.266	1	1	0	0	0	0	0	0	0	0	0	0	0	0	0	0	0	0	0	0	0	47472000
AT1G27450.2;AT1G27450.1;AT1G27450.3	adenine phosphoribosyl transferase 1 ; adenine phosphoribosyl transferase 1 ; adenine phosphoribosyl transferase 1	179.68	6;5;5	6;5;5	355750000	339440000	302760000	207800000	252180000	150850000	389150000	226890000	420150000	324350000	350770000	281520000	322530000	487140000	221280000	243830000	374780000	196340000	319260000	310400000
AT1G27530.1	CONTAINS InterPro DOMAIN/s: Ubiquitin-conjugating enzyme/RWD-like (InterPro:IPR016135), Ubiquitin-fold modifier-conjugating enzyme 1 (InterPro:IPR014806); Has 269 Blast hits to 269 proteins in 110 species: Archae - 0; Bacteria - 0; Metazoa - 175; Fungi -	19.7	2	2	0	0	0	0	0	0	14501000	0	0	0	0	0	0	0	64303000	0	174260000	0	267220000	0
AT1G27650.1;AT1G27650.2	U2 snRNP auxiliary factor small subunit, putative ; U2 snRNP auxiliary factor small subunit, putative	9.0578	3;2	1;1	0	0	0	0	0	0	0	0	0	0	0	0	0	0	0	0	0	0	26150000	0
AT1G27770.2;AT1G27770.1	autoinhibited Ca2+-ATPase 1 ; autoinhibited Ca2+-ATPase 1	8.5229	2;2	1;1	0	0	0	0	0	0	0	0	0	0	0	0	0	0	0	0	0	0	0	10747000
AT1G27970.1;AT1G27970.2	nuclear transport factor 2B ; nuclear transport factor 2B	52.479	5;4	5;4	314180000	327150000	264370000	299830000	630030000	547310000	415300000	397600000	363050000	426280000	421980000	433120000	304940000	703340000	457110000	476950000	127720000	578930000	360700000	281920000
AT1G28120.1	CONTAINS InterPro DOMAIN/s: Ovarian tumour, otubain (InterPro:IPR003323), Ubiquitin thioesterase Otubain (InterPro:IPR016615), Peptidase C65, otubain (InterPro:IPR019400); Has 413 Blast hits to 411 proteins in 139 species: Archae - 0; Bacteria - 0; Metazo	11.068	1	1	0	0	0	0	0	0	0	0	0	0	0	0	0	0	0	0	0	0	0	23152000
AT1G28130.1	Auxin-responsive GH3 family protein	30.401	1	1	0	0	0	0	0	0	0	0	0	0	0	0	0	0	0	0	0	0	0	20872000
AT1G28200.1	FH interacting protein 1	15.161	2	2	111260000	90910000	89591000	46206000	12160000	67890000	0	94456000	0	0	0	127470000	99553000	13060000	81816000	45850000	0	0	116370000	106860000
AT1G28290.2;AT1G28290.1	arabinogalactan protein 31 ; arabinogalactan protein 31	44.209	3;3	3;3	923230000	871950000	1009800000	1393600000	1289500000	1389800000	1201900000	1157000000	182140000	1157600000	1013800000	1392400000	953550000	1647700000	994520000	962560000	1243000000	1554800000	959710000	1250700000
AT1G28350.1	Nucleotidylyl transferase superfamily protein	60.218	9	8	205380000	174330000	278960000	226360000	198560000	268510000	196150000	179540000	138140000	176970000	179640000	203860000	215830000	327990000	158560000	237610000	165750000	237200000	183310000	226990000
AT1G28680.1	HXXXD-type acyl-transferase family protein	21.542	5	5	98603000	0	116790000	0	0	0	107460000	102400000	89728000	0	0	124260000	0	160120000	57893000	102700000	0	0	0	0
AT1G28960.4;AT1G28960.2;AT1G28960.5;AT1G28960.3;AT1G28960.1	nudix hydrolase homolog 15 ; nudix hydrolase homolog 15 ; nudix hydrolase homolog 15 ; nudix hydrolase homolog 15 ; nudix hydrolase homolog 15	5.8546	1;1;1;1;1	1;1;1;1;1	0	0	0	0	0	0	0	0	0	0	0	0	0	0	0	0	3701400	0	0	0
AT1G29025.1	Calcium-binding EF-hand family protein	4.8286	2	2	0	0	0	0	0	0	0	0	0	0	0	0	0	0	0	0	0	42685000	0	0
AT1G29150.1	non-ATPase subunit 9	104.02	12	12	945350000	635850000	804840000	874590000	831040000	572550000	1301500000	706510000	775820000	519570000	688730000	777790000	831660000	1143700000	695430000	1068300000	974130000	830800000	719830000	865990000
AT1G29250.1	Alba DNA/RNA-binding protein	47.797	3;1	1;0	169430000	206280000	153150000	205360000	252710000	120460000	181670000	146830000	201740000	183190000	200140000	190390000	139500000	195540000	253850000	209780000	84789000	104030000	89370000	131320000
AT2G34250.2;AT2G34250.1;AT1G29310.1	SecY protein transport family protein ; SecY protein transport family protein ; SecY protein transport family protein	116.35	9;9;9	9;9;9	1013700000	851920000	972450000	1028100000	900080000	958690000	1334200000	955750000	1081600000	1033700000	992210000	956360000	993370000	1023400000	884410000	1004100000	721180000	708140000	722870000	692570000
AT1G29320.1	Transducin/WD40 repeat-like superfamily protein	4.2111	1	1	0	0	0	0	0	0	0	0	0	0	0	0	0	0	0	0	0	0	0	14739000
AT1G29370.1;AT1G29350.1	Kinase-related protein of unknown function (DUF1296) ; Kinase-related protein of unknown function (DUF1296)	186.76	8;8	8;8	399940000	302050000	317530000	313990000	831570000	953320000	439220000	635680000	366340000	282040000	363260000	460750000	469960000	313500000	531660000	797430000	665000000	564470000	461600000	583630000
AT1G29470.2;AT1G29470.1	S-adenosyl-L-methionine-dependent methyltransferases superfamily protein ; S-adenosyl-L-methionine-dependent methyltransferases superfamily protein	323.31	9;9;1	6;6;0	257050000	167110000	204050000	81381000	25008000	151510000	12705000	249660000	0	213350000	188280000	380620000	385810000	47081000	109160000	131160000	183280000	158250000	0	316030000
AT1G29790.2;AT1G29790.1	S-adenosyl-L-methionine-dependent methyltransferases superfamily protein ; S-adenosyl-L-methionine-dependent methyltransferases superfamily protein	33.262	2;2	2;2	0	0	0	0	0	0	0	0	0	0	0	0	0	0	0	0	0	25858000	0	0
AT1G29850.1;AT1G29850.2;AT1G29850.3	double-stranded DNA-binding family protein ; double-stranded DNA-binding family protein ; double-stranded DNA-binding family protein	29.109	1;1;1	1;1;1	0	0	0	0	0	0	0	0	0	0	0	0	0	0	0	0	0	0	0	19528000
AT1G29880.1	glycyl-tRNA synthetase / glycine--tRNA ligase	218.9	14	14	737580000	751220000	756140000	890840000	810630000	611120000	811140000	658570000	660850000	512020000	753230000	610110000	751920000	891640000	667050000	628450000	832750000	747650000	689650000	797680000
AT1G29900.1	carbamoyl phosphate synthetase B	117.4	14	14	435970000	336900000	482020000	464540000	415860000	305260000	527560000	320850000	417600000	420960000	409710000	372730000	461210000	668260000	368240000	360180000	589210000	365920000	223250000	334420000
AT2G34420.1;AT2G34430.1;AT1G29930.1;AT1G29920.1;AT1G29910.1	photosystem II light harvesting complex gene B1B2 ; light-harvesting chlorophyll-protein complex II subunit B1 ; chlorophyll A/B binding protein 1 ; chlorophyll A/B-binding protein 2 ; chlorophyll A/B binding protein 3	6.393	1;1;1;1;1	1;1;1;1;1	0	0	0	0	0	0	0	0	0	0	0	0	0	0	0	0	0	0	9051800	0
AT1G29965.1	Ribosomal protein L18ae/LX family protein	1.592	3	1	0	0	0	0	0	0	0	0	0	0	0	0	0	0	0	0	0	0	0	363130000
AT1G29990.1	prefoldin 6	7.0829	1	1	0	0	0	0	0	0	0	0	0	0	0	0	0	0	0	0	0	0	0	83495000
AT1G30070.1;AT1G30070.2	SGS domain-containing protein ; SGS domain-containing protein	1.9511	2;2	2;2	0	0	0	0	0	0	0	0	0	0	0	0	0	0	0	0	0	0	0	47324000
AT1G30120.1	pyruvate dehydrogenase E1 beta	2.0285	2	1	0	0	0	0	0	0	0	0	0	0	0	0	0	0	0	0	0	35861000	0	0
AT1G30230.1;AT1G30230.2	Glutathione S-transferase, C-terminal-like;Translation elongation factor EF1B/ribosomal protein S6 ; Glutathione S-transferase, C-terminal-like;Translation elongation factor EF1B/ribosomal protein S6	323.31	10;10	7;7	2238600000	2362900000	2904700000	2523300000	2143300000	1567700000	3180300000	2186400000	3379300000	2304400000	2232200000	2561300000	2537900000	4132200000	1737000000	2502900000	3283500000	1617700000	1857900000	1866600000
AT1G30240.1;AT1G30240.2	FUNCTIONS IN: binding; INVOLVED IN: biological_process unknown; LOCATED IN: cellular_component unknown; EXPRESSED IN: 21 plant structures; EXPRESSED DURING: 13 growth stages; CONTAINS InterPro DOMAIN/s: Armadillo-type fold (InterPro:IPR016024); Has 165 Bl	12.055	2;2	2;2	0	0	0	0	0	0	0	0	0	0	0	0	0	0	0	0	0	0	0	6072000
AT1G30400.2;AT1G30400.1	multidrug resistance-associated protein 1 ; multidrug resistance-associated protein 1	24.151	6;6	5;5	0	88799000	110810000	152880000	98183000	91161000	116420000	83216000	85658000	104550000	104940000	90425000	61247000	110740000	107030000	0	92721000	105860000	0	0
AT1G30450.3;AT1G30450.2;AT1G30450.1	cation-chloride co-transporter 1 ; cation-chloride co-transporter 1 ; cation-chloride co-transporter 1	21.3	2;2;2	2;2;2	0	0	0	0	0	0	0	0	20965000	0	0	0	0	0	0	0	0	0	0	0
AT1G30470.2;AT1G30470.1;AT1G30470.3	SIT4 phosphatase-associated family protein ; SIT4 phosphatase-associated family protein ; SIT4 phosphatase-associated family protein	19.497	5;5;4	5;5;4	26051000	24539000	99783000	0	0	0	18659000	140170000	28478000	0	26773000	22433000	0	29640000	23410000	16925000	0	120360000	171740000	0
AT1G30510.3;AT1G30510.1;AT1G30510.2	root FNR 2 ; root FNR 2 ; root FNR 2	63.255	14;14;14	9;9;9	484930000	723110000	697180000	584350000	522090000	718410000	531610000	824870000	696280000	490100000	688250000	585740000	535600000	777480000	762330000	601360000	617980000	540460000	738120000	531150000
AT1G30580.1	GTP binding	311.81	14	14	1821000000	2019100000	1976800000	1965400000	2209100000	1322500000	1989300000	1293000000	1748800000	1968200000	1770400000	1660200000	1691000000	2716500000	1434200000	1448800000	2099000000	1577900000	1407100000	1715800000
AT1G30630.1	Coatomer epsilon subunit	286.2	13;2;2	13;2;2	775310000	872020000	844000000	694190000	817480000	578110000	1074400000	579350000	952260000	955370000	738410000	831680000	774700000	1163900000	726100000	704770000	673410000	696930000	907850000	591360000
AT1G30690.2;AT1G30690.1	Sec14p-like phosphatidylinositol transfer family protein ; Sec14p-like phosphatidylinositol transfer family protein	187.61	18;18	18;18	713180000	717300000	622950000	711410000	195990000	682150000	774760000	593920000	939830000	817320000	602960000	760180000	705090000	440770000	497130000	420350000	499470000	722190000	810890000	622640000
AT1G30820.1	CTP synthase family protein	3.8383	2	2	0	0	0	0	0	0	0	0	0	0	0	0	0	65587000	0	0	0	0	0	0
AT1G30870.1	Peroxidase superfamily protein	59.463	4	4	0	103490000	0	0	0	0	0	0	0	0	0	0	0	0	0	39649000	0	0	33900000	0
AT1G31070.2	N-acetylglucosamine-1-phosphate uridylyltransferase 1	56.624	6;2	3;1	114990000	126630000	121020000	113450000	131430000	120730000	147150000	96142000	156610000	159450000	122290000	111460000	116080000	168490000	108900000	150120000	106770000	135410000	146580000	131490000
AT1G31180.1	isopropylmalate dehydrogenase 3	16.763	5	4	172790000	141270000	112220000	104380000	194570000	139910000	118620000	125120000	66738000	126220000	129890000	135160000	152570000	229920000	141910000	108440000	147470000	145170000	0	0
AT1G31230.1	aspartate kinase-homoserine dehydrogenase i	71.756	6	4	38589000	0	0	0	69843000	81778000	0	32794000	54766000	53127000	42079000	46034000	60231000	66606000	0	39710000	0	81522000	0	66877000
AT2G35635.1;AT1G31340.1	ubiquitin 7 ; related to ubiquitin 1	21.117	5;5	2;2	0	90655000	84438000	0	0	64058000	47458000	66722000	105720000	99462000	116510000	68749000	0	73154000	62888000	60305000	50879000	0	0	0
AT1G31650.1	RHO guanyl-nucleotide exchange factor 14	-2	1	1	0	0	0	0	0	0	0	0	0	0	0	0	0	0	0	0	0	63256000	0	0
AT1G31730.1	Adaptin family protein	33.268	7	7	54660000	64555000	72690000	93606000	0	130490000	141970000	79509000	68645000	93349000	90972000	0	75540000	114370000	56741000	70195000	132940000	118970000	0	0
AT1G31780.1	CONTAINS InterPro DOMAIN/s: Conserved oligomeric complex COG6 (InterPro:IPR010490); Has 384 Blast hits to 379 proteins in 190 species: Archae - 0; Bacteria - 4; Metazoa - 151; Fungi - 156; Plants - 42; Viruses - 0; Other Eukaryotes - 31 (source: NCBI BLin	16.963	3	3	43355000	26407000	31170000	33658000	33809000	25191000	35887000	26126000	46383000	34669000	38644000	0	24971000	34830000	0	23234000	0	40762000	12084000	26639000
AT1G31812.1	acyl-CoA-binding protein 6	120.06	6	6	1876400000	2080500000	1387200000	1331900000	1298600000	1226100000	1577400000	1154200000	2803200000	2680200000	1533600000	1662000000	866430000	1296100000	1157900000	538930000	0	1255200000	115790000	1252400000
AT1G31860.1	histidine biosynthesis bifunctional protein (HISIE)	8.6536	2	2	0	0	0	0	0	0	0	100950000	0	0	105180000	0	0	0	0	0	0	0	0	0
AT1G31910.2;AT1G31910.1	GHMP kinase family protein ; GHMP kinase family protein	118.35	2;2	2;2	66974000	69330000	77104000	85587000	72153000	40906000	64253000	46069000	79282000	137750000	72512000	66189000	78883000	88414000	55327000	60834000	25020000	112320000	28027000	66966000
AT1G31970.1	DEA(D/H)-box RNA helicase family protein	2.2567	3	3	0	0	0	0	0	60834000	0	0	0	0	0	0	0	0	0	0	0	0	0	0
AT1G32050.1	SCAMP family protein	3.2922	1	1	0	0	0	0	0	0	0	0	0	0	0	0	0	0	0	0	0	0	0	20718000
AT1G32100.1	pinoresinol reductase 1	3.7567	1	1	0	0	0	0	0	0	0	0	0	0	0	0	0	0	0	0	0	0	18835000	0
AT2G35390.1;AT1G32380.1;AT2G35390.2;AT2G35390.3	Phosphoribosyltransferase family protein ; phosphoribosyl pyrophosphate (PRPP) synthase 2 ; Phosphoribosyltransferase family protein ; Phosphoribosyltransferase family protein	11.61	2;2;2;1	2;2;2;1	23182000	21090000	28558000	26307000	20872000	0	19674000	14381000	17956000	26746000	14206000	22143000	17769000	23329000	14594000	17546000	0	26200000	0	21205000
AT1G32440.1	plastidial pyruvate kinase 3	20.769	3	1	0	0	0	0	0	0	0	0	0	0	0	0	0	0	0	0	0	0	0	22005000
AT2G35370.1;AT1G32470.1	glycine decarboxylase complex H ; Single hybrid motif superfamily protein	1.6119	1;1	1;1	0	0	0	0	0	0	0	0	0	0	0	0	0	0	0	0	0	0	0	17019000
AT1G32580.1	plastid developmental protein DAG, putative	4.6489	1	1	0	0	0	0	0	0	0	0	0	0	0	0	0	0	0	0	0	0	0	7255300
AT1G33040.1	nascent polypeptide-associated complex subunit alpha-like protein 5	26.663	3	3	82293000	75388000	87347000	157820000	258870000	89554000	63381000	83250000	127230000	44208000	55089000	81327000	142240000	86254000	70702000	64281000	0	85712000	68053000	115320000
AT1G33140.1;AT1G33120.1	Ribosomal protein L6 family ; Ribosomal protein L6 family	250.92	10;10	6;6	3304200000	3499500000	2730900000	4428300000	5188300000	2497100000	3777500000	2323200000	2926500000	2189500000	1981700000	2812700000	2858800000	8253700000	3980600000	4054100000	5578300000	3197600000	1725700000	2156200000
AT1G33410.2;AT1G33410.1	SUPPRESSOR OF AUXIN RESISTANCE1 ; SUPPRESSOR OF AUXIN RESISTANCE1	4.8732	1;1	1;1	0	0	0	0	0	0	0	0	0	0	0	0	0	0	0	0	0	3425700	0	0
AT1G33610.1	Leucine-rich repeat (LRR) family protein	9.0176	1	1	0	0	0	0	0	0	0	0	0	0	0	0	0	0	0	0	0	0	0	3566400
AT1G33680.1	KH domain-containing protein	25.734	4	4	78237000	126720000	70313000	65626000	80735000	56043000	0	99285000	89792000	81984000	120790000	122180000	74874000	26668000	35448000	30459000	0	35127000	0	119730000
AT1G33750.1	Terpenoid cyclases/Protein prenyltransferases superfamily protein	12.005	2	2	0	0	0	0	0	0	0	0	0	0	0	0	0	0	0	0	0	0	14076000	0
AT1G33800.1	Protein of unknown function (DUF579)	56.801	2	2	76756000	140060000	87059000	0	0	0	0	188100000	382370000	124870000	121050000	0	0	24473000	68722000	0	0	0	153600000	0
AT1G34130.1	staurosporin and temperature sensitive 3-like b	4.6695	1	1	0	0	0	0	0	0	0	0	0	0	0	0	0	0	0	0	0	48909000	0	0
AT1G34220.2;AT1G34220.1	Regulator of Vps4 activity in the MVB pathway protein ; Regulator of Vps4 activity in the MVB pathway protein	10.795	2;2	2;2	0	0	0	0	0	0	0	0	0	0	0	0	0	0	0	0	0	7879500	0	0
AT1G34360.1	translation initiation factor 3 (IF-3) family protein	4.7945	1	1	0	0	0	0	0	0	0	0	0	0	0	0	0	0	0	0	0	0	0	21833000
AT1G34430.1	2-oxoacid dehydrogenases acyltransferase family protein	151.36	10	8	474060000	378110000	369400000	496890000	577800000	292480000	408160000	422160000	337130000	639270000	358000000	462750000	500010000	543580000	442900000	484060000	315680000	512290000	190760000	245170000
AT1G35160.1;AT1G35160.2	GF14 protein phi chain ; GF14 protein phi chain	107.43	10;9	4;3	532590000	556450000	559610000	386140000	916530000	435580000	866110000	700400000	688340000	687270000	681690000	458160000	442060000	490920000	945010000	1046600000	539420000	625560000	1117100000	688050000
AT1G35540.1	auxin response factor 14	-2	1	1	0	0	0	0	0	0	0	0	0	0	0	0	0	0	0	104500000	0	0	0	0
AT1G35580.2;AT1G35580.1;AT1G35580.3	cytosolic invertase 1 ; cytosolic invertase 1 ; cytosolic invertase 1	152.15	9;9;8;3;3;3;1	6;6;5;0;0;0;0	359840000	447880000	401420000	370400000	385430000	365630000	409950000	327990000	398800000	552690000	398680000	382510000	446810000	537640000	374480000	381320000	292900000	386330000	394410000	333790000
AT1G35620.1	PDI-like 5-2	13.35	3	3	79153000	70931000	93667000	0	61733000	138550000	97759000	114850000	86845000	58317000	72310000	0	0	132860000	73746000	114960000	93153000	155550000	62577000	74360000
AT1G35670.1;AT4G09570.1	calcium-dependent protein kinase 2 ; calcium-dependent protein kinase 4	23.886	3;2	3;2	0	0	0	0	0	0	0	0	0	0	0	0	84791000	0	0	0	0	0	0	0
AT1G35720.1	annexin 1	323.31	18	18	4726800000	6762200000	5827000000	4315600000	8526000000	7013700000	12259000000	7042100000	6846700000	6032200000	7471500000	4540500000	4973200000	3686300000	8592300000	8677400000	6261000000	5054400000	12067000000	5121000000
AT1G36050.2;AT1G36050.1	Endoplasmic reticulum vesicle transporter protein ; Endoplasmic reticulum vesicle transporter protein	3.2004	1;1	1;1	0	0	0	0	0	0	0	0	0	0	0	0	0	0	0	0	0	0	0	30779000
AT1G36160.2;AT1G36160.1	acetyl-CoA carboxylase 1 ; acetyl-CoA carboxylase 1	74.989	10;10	9;9	172270000	175850000	159630000	180660000	123890000	125220000	180350000	120660000	175170000	208070000	210820000	129920000	166800000	147770000	148160000	169610000	75416000	207040000	156250000	171850000
AT1G36310.2;AT1G36310.1	S-adenosyl-L-methionine-dependent methyltransferases superfamily protein ; S-adenosyl-L-methionine-dependent methyltransferases superfamily protein	3.2032	2;2	2;2	0	0	0	0	0	0	0	0	0	0	0	0	0	0	0	0	22902000	0	0	0
AT1G36730.1	Translation initiation factor IF2/IF5	10.628	3	2	0	0	0	0	0	0	0	81358000	0	0	0	0	0	0	0	0	0	0	123050000	0
AT1G37130.1	nitrate reductase 2	40.434	3	3	0	39115000	47290000	40664000	0	0	0	48418000	0	51257000	44801000	0	0	47174000	65141000	43651000	39640000	0	27005000	36509000
AT1G37150.1;AT1G37150.4;AT1G37150.3;AT1G37150.2;AT2G25710.2;AT2G25710.1	holocarboxylase synthetase 2 ; holocarboxylase synthetase 2 ; holocarboxylase synthetase 2 ; holocarboxylase synthetase 2 ; holocarboxylase synthase 1 ; holocarboxylase synthase 1	1.9094	1;1;1;1;1;1	1;1;1;1;1;1	0	0	0	0	0	0	0	0	0	0	0	0	0	0	0	0	0	0	2122600	0
AT1G41830.1	SKU5-similar 6	86.184	8	5	608180000	598950000	478220000	585990000	642770000	427150000	500300000	500460000	711230000	801540000	545810000	529180000	651220000	762720000	538900000	669500000	519830000	620130000	393700000	517060000
AT1G41880.1	Ribosomal protein L35Ae family protein	107.98	3;1	1;0	0	0	0	0	0	0	531740000	342990000	104870000	336260000	136860000	382310000	337180000	107790000	397280000	236170000	0	0	2050500000	0
AT1G42440.1	FUNCTIONS IN: molecular_function unknown; INVOLVED IN: ribosome biogenesis; LOCATED IN: nucleus; EXPRESSED IN: 22 plant structures; EXPRESSED DURING: 13 growth stages; CONTAINS InterPro DOMAIN/s: AARP2CN (InterPro:IPR012948), Protein of unknown function D	13.1	2	2	0	0	0	0	0	0	0	0	0	0	0	0	0	0	0	0	0	15975000	0	0
AT1G42960.1	expressed protein localized to the inner membrane of the chloroplast.	38.543	2	2	0	0	0	0	238600000	159360000	0	0	0	0	0	0	0	0	0	0	0	0	0	0
AT1G43170.9;AT1G43170.8;AT1G43170.7;AT1G43170.6;AT1G43170.5;AT1G43170.3;AT1G43170.2;AT1G43170.1;AT1G43170.4	ribosomal protein 1 ; ribosomal protein 1 ; ribosomal protein 1 ; ribosomal protein 1 ; ribosomal protein 1 ; ribosomal protein 1 ; ribosomal protein 1 ; ribosomal protein 1 ; ribosomal protein 1	300.13	14;14;14;14;14;14;14;14;13	10;10;10;10;10;10;10;10;9	4994000000	5804100000	3761800000	5883800000	7129000000	9133600000	5022500000	8209700000	7320200000	3660400000	6017300000	8169900000	8043700000	6638200000	8818400000	7467300000	7611800000	7088200000	5131500000	5787300000
AT1G43190.3;AT1G43190.2;AT1G43190.1	polypyrimidine tract-binding protein 3 ; polypyrimidine tract-binding protein 3 ; polypyrimidine tract-binding protein 3	17.067	5;5;5	5;5;5	137400000	130580000	155530000	215050000	193960000	156570000	207120000	122090000	115150000	177380000	106740000	155810000	141680000	135430000	140820000	133170000	140130000	187250000	157950000	118270000
AT1G43690.1	ubiquitin interaction motif-containing protein	46.323	4	4	0	35269000	31155000	52430000	0	28639000	37984000	30478000	47311000	47076000	43135000	37793000	37142000	37891000	34988000	33715000	0	37499000	33609000	47499000
AT1G43710.1	Pyridoxal phosphate (PLP)-dependent transferases superfamily protein	39.362	6	6	262680000	157040000	195890000	226340000	346100000	436130000	261100000	294480000	215800000	166490000	218480000	249970000	193230000	394480000	325170000	232050000	436400000	260540000	157310000	329800000
AT1G43890.3;AT1G43890.2;AT1G43890.1	RAB GTPASE HOMOLOG B18 ; RAB GTPASE HOMOLOG B18 ; RAB GTPASE HOMOLOG B18	14.809	6;6;6;1	6;6;6;1	395660000	291450000	379300000	395680000	515150000	551770000	0	310950000	433620000	379280000	0	329970000	428800000	764610000	382430000	547490000	303640000	425290000	355490000	259520000
AT1G44170.2;AT1G44170.1;AT1G44170.3	aldehyde dehydrogenase 3H1 ; aldehyde dehydrogenase 3H1 ; aldehyde dehydrogenase 3H1	29.232	6;6;4	6;6;4	245280000	128160000	107300000	185760000	145850000	125150000	285370000	156050000	131140000	212330000	139440000	169080000	152210000	207550000	243610000	219140000	243220000	125920000	194190000	125480000
AT1G44790.1	ChaC-like family protein	27.18	1	1	0	0	0	0	0	0	0	0	0	0	0	0	0	0	0	0	0	0	0	8821500
AT1G44800.1	nodulin MtN21 /EamA-like transporter family protein	10.497	1	1	0	0	0	0	0	0	0	0	0	0	0	0	0	0	0	0	0	0	0	6168200
AT1G44835.1;AT1G44835.2	YbaK/aminoacyl-tRNA synthetase-associated domain ; YbaK/aminoacyl-tRNA synthetase-associated domain	36.158	5;5	5;5	137530000	143410000	115590000	165850000	67011000	103470000	19619000	108360000	163710000	215360000	53714000	157770000	150140000	158580000	77470000	123440000	62515000	159800000	201580000	244760000
AT1G45000.1;AT1G45000.2	AAA-type ATPase family protein ; AAA-type ATPase family protein	109.01	12;10	1;1	0	0	0	0	0	0	0	0	0	0	0	0	0	0	0	0	0	0	0	42927000
AT1G45130.1	beta-galactosidase 5	44.205	4;1;1;1;1	3;0;0;0;0	72924000	89923000	64230000	61225000	72621000	57635000	85531000	63097000	77443000	119480000	72010000	70011000	92533000	92672000	61405000	84870000	53468000	60376000	74021000	81351000
AT1G45145.1	thioredoxin H-type 5	163.06	3	3	82505000	884400000	55998000	50348000	0	0	162510000	82445000	488240000	533070000	171410000	95996000	0	0	193840000	0	81337000	0	1041600000	75615000
AT1G47128.1	Granulin repeat cysteine protease family protein	41.602	3	3	0	0	0	0	0	0	0	0	0	0	0	0	0	0	0	0	0	0	67484000	0
AT1G47200.1;AT5G43070.1	WPP domain protein 2 ; WPP domain protein 1	36.133	2;1	2;1	0	0	0	0	0	0	0	0	0	0	0	0	0	0	0	0	0	64196000	0	0
AT1G47250.1	20S proteasome alpha subunit F2	12.759	8	1	0	0	0	0	0	0	0	0	0	0	0	0	0	0	0	0	0	0	45178000	0
AT1G47260.1	gamma carbonic anhydrase 2	81.621	10	9	513580000	439020000	430270000	409090000	663710000	698240000	495570000	718870000	539650000	337610000	430090000	500970000	609270000	926300000	475260000	711670000	608140000	624620000	439030000	599010000
AT1G47290.1;AT1G47290.2	3beta-hydroxysteroid-dehydrogenase/decarboxylase isoform 1 ; 3beta-hydroxysteroid-dehydrogenase/decarboxylase isoform 1	22.475	2;2	2;2	0	0	0	0	0	0	0	0	0	0	0	0	0	0	0	0	0	7357300	0	0
AT1G47380.1	Protein phosphatase 2C family protein	6.3394	1	1	0	0	0	0	0	0	0	0	0	0	0	0	0	0	0	0	0	0	0	12567000
AT1G47420.1	succinate dehydrogenase 5	93.358	5	5	383590000	319740000	319590000	309310000	316190000	177200000	396480000	208840000	223800000	266180000	262420000	214580000	242280000	431620000	225160000	276920000	340470000	193180000	299810000	219340000
AT1G47480.1	alpha/beta-Hydrolases superfamily protein	9.2681	1	1	0	0	0	0	0	0	0	0	0	0	0	0	0	0	0	0	0	0	24064000	0
AT1G47500.1;AT1G47490.1	RNA-binding protein 47C ; RNA-binding protein 47C	3.2379	3;2	2;1	0	92182000	78888000	90735000	84386000	86366000	104340000	0	80490000	60187000	74705000	84631000	105930000	281640000	0	0	101790000	0	62280000	0
AT1G47550.1;AT1G47550.2	exocyst complex component sec3A ; exocyst complex component sec3A	3.8371	1;1	1;1	0	0	0	0	0	0	0	0	0	0	0	0	0	0	0	0	0	9132900	0	0
AT1G47600.1;AT1G47600.2	beta glucosidase 34 ; beta glucosidase 34	323.31	15;14	7;6	1277000000	1421200000	996260000	710150000	907250000	1066700000	858240000	975830000	1822800000	1775600000	971610000	934440000	1010100000	1529500000	775030000	1159800000	1152700000	871330000	1419000000	841150000
AT1G47750.1	peroxin 11A	12.595	2	2	0	0	0	0	0	0	0	0	0	0	0	147810000	0	0	0	0	0	0	0	0
AT1G48030.2;AT1G48030.1	mitochondrial lipoamide dehydrogenase 1 ; mitochondrial lipoamide dehydrogenase 1	197.41	15;15;2	8;8;0	1150500000	1503500000	1243800000	1278700000	1387100000	1963000000	1657500000	1484300000	1481500000	1397100000	1320100000	1600800000	1620800000	1371900000	1033400000	1201200000	1242900000	1643000000	1397000000	1483300000
AT1G48230.1	nodulin MtN21 /EamA-like transporter family protein	2.8956	1	1	0	0	0	0	0	0	0	0	0	0	0	0	0	0	0	0	0	20154000	0	0
AT1G48410.1;AT1G48410.3;AT1G48410.2	Stabilizer of iron transporter SufD / Polynucleotidyl transferase ; Stabilizer of iron transporter SufD / Polynucleotidyl transferase ; Stabilizer of iron transporter SufD / Polynucleotidyl transferase	12.575	4;4;4;1;1	4;4;4;1;1	61857000	55666000	62585000	55816000	54958000	46323000	62850000	0	0	0	0	0	0	0	0	0	0	0	0	0
AT1G48420.1	D-cysteine desulfhydrase	6.155	1	1	0	0	0	0	0	0	0	0	0	0	0	0	0	0	0	0	0	0	0	9679300
AT1G48440.1	B-cell receptor-associated 31-like	31.191	1	1	0	0	0	0	0	0	0	0	0	0	0	0	0	0	0	0	0	0	0	72903000
AT1G48480.1	receptor-like kinase 1	2.41	1	1	0	0	0	0	0	0	0	0	0	0	0	0	0	0	0	0	0	0	0	0
AT1G48600.1;AT1G48600.2	S-adenosyl-L-methionine-dependent methyltransferases superfamily protein ; S-adenosyl-L-methionine-dependent methyltransferases superfamily protein	17.213	9;9	5;5	274530000	214260000	159560000	165230000	207790000	140980000	209760000	131460000	123430000	179400000	167380000	195120000	194910000	271010000	192140000	199540000	220970000	174420000	187520000	186310000
AT1G48610.2;AT1G48610.1	AT hook motif-containing protein ; AT hook motif-containing protein	25.337	5;5	5;5	0	0	0	60573000	0	0	0	0	0	0	0	57405000	0	39481000	0	47506000	0	75993000	0	0
AT1G48620.1	high mobility group A5	2.319	1	1	0	0	0	0	0	0	0	0	0	0	0	0	0	0	14426000	0	0	0	0	0
AT1G48630.1	receptor for activated C kinase 1B	152.09	12	3	318580000	415730000	356280000	405910000	1036200000	827690000	362500000	369920000	177150000	256230000	259180000	272540000	238970000	1108700000	490840000	461450000	426990000	629060000	224340000	372150000
AT1G48650.1;AT1G48650.2	DEA(D/H)-box RNA helicase family protein ; DEA(D/H)-box RNA helicase family protein	4.8419	3;3;1	3;3;1	0	0	0	0	109300000	0	0	0	0	0	0	0	0	0	0	0	0	0	0	0
AT1G48830.2;AT1G48830.1	Ribosomal protein S7e family protein ; Ribosomal protein S7e family protein	323.31	4;4	4;4	472050000	294350000	507470000	526840000	525420000	454370000	506140000	362760000	484080000	483640000	475400000	496310000	383320000	695080000	436690000	400010000	545660000	405850000	395390000	494140000
AT1G48850.1;AT1G48850.3;AT1G48850.2	chorismate synthase, putative / 5-enolpyruvylshikimate-3-phosphate phospholyase, putative ; chorismate synthase, putative / 5-enolpyruvylshikimate-3-phosphate phospholyase, putative ; chorismate synthase, putative / 5-enolpyruvylshikimate-3-phosphate phos	96.387	5;4;4	5;4;4	269700000	264290000	255840000	143380000	275400000	201240000	447140000	272420000	254210000	282040000	249680000	207670000	221470000	343580000	307310000	248870000	276660000	237280000	234520000	274410000
AT1G48860.2;AT1G48860.1	RNA 3-terminal phosphate cyclase/enolpyruvate transferase, alpha/beta ; RNA 3-terminal phosphate cyclase/enolpyruvate transferase, alpha/beta	63.137	9;9	3;3	576630000	576010000	575980000	445690000	499350000	284260000	682350000	344990000	568790000	694490000	528250000	521930000	474740000	581200000	435250000	487630000	210180000	479940000	309520000	297750000
AT1G48900.2;AT1G48900.1;AT1G15310.1	Signal recognition particle, SRP54 subunit protein ; Signal recognition particle, SRP54 subunit protein ; signal recognition particle 54 kDa subunit	9.0851	2;2;1	1;1;1	0	0	0	0	0	0	0	0	0	0	0	0	0	0	0	0	0	67373000	0	0
AT1G48920.1	nucleolin like 1	173.56	13;1	13;1	1888000000	1377400000	1989600000	2351400000	2334600000	3800600000	1468200000	2632800000	1549400000	955340000	1504400000	2197700000	1725200000	1536900000	2717400000	2280700000	2290900000	3133400000	1424400000	2430900000
AT1G49240.1	actin 8	5.0539	16	1	0	0	0	0	0	0	0	0	0	0	0	0	0	0	0	0	0	23667000	0	0
AT1G49430.1	long-chain acyl-CoA synthetase 2	5.6027	1	1	0	0	0	0	0	0	0	0	0	0	0	0	0	0	0	0	0	0	0	4869900
AT1G49600.1	RNA-binding protein 47A	148.82	8;1	6;0	323970000	301930000	351360000	245150000	320800000	159520000	333450000	180940000	311810000	338830000	258240000	249090000	266740000	434390000	152950000	160660000	225700000	324590000	249270000	320690000
AT1G49670.1;AT1G49670.2	ARP protein (REF) ; ARP protein (REF)	5.1709	2;2	2;2	0	0	0	0	0	0	0	0	0	0	0	0	0	0	0	72827000	0	0	0	0
AT1G49760.2;AT1G49760.1	poly(A) binding protein 8 ; poly(A) binding protein 8	232.84	13;13;1;1;1	10;10;0;0;0	1096600000	894250000	1144000000	1417400000	1456700000	1037300000	1492600000	984600000	1035300000	654240000	935050000	909870000	798330000	1825500000	1172800000	876790000	1365300000	927730000	549710000	1416200000
AT1G49820.1	S-methyl-5-thioribose kinase	2.5581	1	1	0	0	0	0	0	0	0	0	0	0	0	0	0	0	0	0	0	0	0	28180000
AT1G50030.2;AT1G50030.1	target of rapamycin ; target of rapamycin	11.483	3;3	3;3	0	0	0	0	0	0	0	0	0	0	0	0	0	0	0	0	0	10036000	0	0
AT1G50140.2;AT1G50140.1	P-loop containing nucleoside triphosphate hydrolases superfamily protein ; P-loop containing nucleoside triphosphate hydrolases superfamily protein	6.4079	2;2	1;1	0	0	0	0	0	0	0	0	0	0	0	0	0	0	0	0	0	0	0	8261500
AT1G50200.1;AT1G50200.2	Alanyl-tRNA synthetase ; Alanyl-tRNA synthetase	152.41	13;12	13;12	853380000	791000000	768860000	758820000	807120000	924180000	894370000	650140000	564070000	602240000	702720000	817130000	1042800000	1251500000	590640000	994410000	810430000	856130000	417730000	842310000
AT1G50240.2	Protein kinase family protein with ARM repeat domain	2.276	1	1	0	0	0	0	0	0	0	0	0	0	0	0	0	0	0	0	0	0	0	0
AT1G50370.1	Calcineurin-like metallo-phosphoesterase superfamily protein	-2	7	1	0	0	0	0	0	0	0	0	0	0	0	0	0	0	0	0	0	0	0	37840000
AT1G50380.1	Prolyl oligopeptidase family protein	6.1151	2	2	0	0	0	57098000	0	0	0	0	0	58060000	0	0	0	65152000	0	0	35807000	0	0	0
AT1G50430.2;AT1G50430.1	Ergosterol biosynthesis ERG4/ERG24 family ; Ergosterol biosynthesis ERG4/ERG24 family	13.034	3;3	3;3	97755000	0	119410000	119330000	0	97454000	44113000	154000000	113490000	103920000	116520000	132860000	0	87227000	76234000	72278000	0	121110000	121720000	94676000
AT1G50480.1	10-formyltetrahydrofolate synthetase	50.032	8	8	242490000	224870000	185170000	190920000	147130000	275890000	290270000	216020000	129620000	210600000	197060000	191010000	213930000	165030000	223080000	316450000	160430000	245470000	252440000	165670000
AT1G50570.2;AT1G50570.1	Calcium-dependent lipid-binding (CaLB domain) family protein ; Calcium-dependent lipid-binding (CaLB domain) family protein	28.24	1;1	1;1	0	0	0	0	0	0	0	0	0	0	0	0	0	0	0	0	0	0	0	7478300
AT1G50670.1	OTU-like cysteine protease family protein	1.7875	1	1	0	0	0	0	0	0	0	0	0	0	0	0	0	0	0	0	0	0	0	38869000
AT1G50710.1	unknown protein; Has 109 Blast hits to 109 proteins in 44 species: Archae - 0; Bacteria - 2; Metazoa - 61; Fungi - 8; Plants - 36; Viruses - 0; Other Eukaryotes - 2 (source: NCBI BLink).	13.263	1	1	0	0	0	0	0	0	0	0	0	0	0	0	0	0	0	0	0	0	0	3407900
AT1G50890.1	ARM repeat superfamily protein	1.6103	1	1	0	0	0	0	0	0	0	0	0	0	0	0	0	0	0	0	0	0	0	2597200
AT1G50920.1	Nucleolar GTP-binding protein	4.2788	3	3	0	0	0	0	0	0	0	36586000	0	0	0	0	0	0	0	0	0	0	0	0
AT1G50940.1	electron transfer flavoprotein alpha	3.8481	1	1	0	0	0	0	0	0	0	0	0	0	0	0	5841600	0	0	0	0	0	0	0
AT5G54640.1;AT4G27230.2;AT4G27230.1;AT3G20670.1;AT1G51060.1	Histone superfamily protein ; histone H2A 2 ; histone H2A 2 ; histone H2A 13 ; histone H2A 10	112.07	2;2;2;2;2	1;1;1;1;1	86154000	204550000	0	0	50431000	10227000	0	28214000	44176000	0	0	140590000	0	172540000	409920000	0	0	516970000	280140000	0
AT1G51160.2;AT1G51160.1	SNARE-like superfamily protein ; SNARE-like superfamily protein	3.2777	1;1	1;1	0	0	0	0	0	0	0	0	0	0	0	0	0	42853000	0	0	0	0	0	0
AT1G51410.1	NAD(P)-binding Rossmann-fold superfamily protein	16.615	1	1	0	0	0	0	0	0	0	0	0	0	0	0	0	0	0	0	0	171790000	0	0
AT1G51470.1	beta glucosidase 35	25.329	12	4	187440000	305490000	197000000	345470000	313000000	278570000	215490000	239300000	350880000	345450000	241010000	228290000	180260000	412900000	240190000	331910000	290430000	260560000	278410000	161030000
AT1G51510.1	RNA-binding (RRM/RBD/RNP motifs) family protein	27.207	1	1	184580000	175790000	174810000	173260000	262330000	236270000	574330000	234640000	160500000	162140000	185220000	190740000	197500000	146550000	242800000	253480000	213610000	224770000	248560000	202070000
AT1G51630.1;AT3G21190.1	O-fucosyltransferase family protein ; O-fucosyltransferase family protein	5.8869	2;1	2;1	67193000	0	0	0	0	0	0	0	0	72023000	0	67303000	74267000	0	0	0	0	0	56114000	0
AT1G51650.1	ATP synthase epsilon chain, mitochondrial	1.8042	1	1	0	0	0	0	0	0	0	0	0	0	0	0	0	0	0	0	0	0	0	85790000
AT1G51680.3;AT1G51680.1;AT1G51680.2	4-coumarate:CoA ligase 1 ; 4-coumarate:CoA ligase 1 ; 4-coumarate:CoA ligase 1	36.441	9;9;6	9;9;6	171150000	183850000	180550000	91417000	159470000	114880000	340780000	241620000	225890000	210910000	246890000	204100000	145300000	160960000	268650000	190680000	0	169920000	118980000	167510000
AT1G51690.2;AT1G51690.1;AT1G51690.3	protein phosphatase 2A 55 kDa regulatory subunit B alpha isoform ; protein phosphatase 2A 55 kDa regulatory subunit B alpha isoform ; protein phosphatase 2A 55 kDa regulatory subunit B alpha isoform	17.014	4;4;4	3;3;3	90073000	67379000	104100000	71782000	0	74359000	109630000	74559000	75581000	82000000	84183000	82627000	85269000	165190000	113090000	94186000	99146000	120780000	97005000	0
AT1G51710.1;AT1G51710.2	ubiquitin-specific protease 6 ; ubiquitin-specific protease 6	35.354	8;7;1	8;7;1	205500000	165210000	199440000	184950000	106790000	178880000	247220000	89472000	112310000	0	141710000	130520000	176110000	175140000	128860000	159970000	0	87929000	154250000	172560000
AT1G51730.1	Ubiquitin-conjugating enzyme family protein	51.206	1	1	0	0	0	0	0	0	0	0	199660000	0	172540000	0	0	0	26978000	0	38455000	0	173520000	0
AT1G51980.1;AT1G51980.2	Insulinase (Peptidase family M16) protein ; Insulinase (Peptidase family M16) protein	323.31	16;13	9;8	1186800000	1083400000	1372900000	1238600000	1223600000	1171800000	1743000000	1085700000	1352600000	1548300000	1453800000	1147600000	1364000000	1937200000	1176700000	1039500000	891680000	1132200000	963550000	1357800000
AT1G51990.2;AT1G51990.1	O-methyltransferase family protein ; O-methyltransferase family protein	-2	1;1	1;1	0	0	0	0	0	0	0	0	0	16388000	0	0	0	0	0	0	0	0	0	0
AT1G52050.1	Mannose-binding lectin superfamily protein	6.1979	2	2	0	0	0	0	0	22460000	0	0	0	0	0	0	0	0	0	0	0	0	0	0
AT1G52060.1	Mannose-binding lectin superfamily protein	4.9099	6	3	0	0	0	0	0	224730000	0	0	0	0	0	0	0	0	0	0	0	0	0	123990000
AT1G52070.1	Mannose-binding lectin superfamily protein	95.755	8	5	375740000	322750000	290890000	583480000	592470000	841300000	571490000	393840000	485910000	339790000	128900000	294110000	318120000	424900000	303960000	330820000	499410000	324680000	174090000	253490000
AT1G52340.1	NAD(P)-binding Rossmann-fold superfamily protein	1.6248	1	1	0	0	0	0	0	0	0	0	0	0	0	0	0	0	0	0	0	0	3891200	0
AT1G52360.1;AT1G52360.2	Coatomer, beta subunit ; Coatomer, beta subunit	193.88	23;23	8;8	1161800000	1110800000	921120000	1234900000	1522700000	1704800000	1668000000	1338800000	1054500000	893470000	1147000000	1192500000	1234900000	1481000000	1423700000	1524500000	1251900000	1219100000	1198600000	1378500000
AT1G52380.1	NUP50 (Nucleoporin 50 kDa) protein	6.5911	3	3	0	0	0	0	0	0	0	0	0	0	0	0	0	0	0	0	0	0	0	141350000
AT1G52570.1	phospholipase D alpha 2	20.342	7	2	91692000	78213000	83911000	0	82335000	0	81639000	47308000	0	0	0	82544000	0	114520000	79997000	62906000	67860000	55219000	0	0
AT3G15710.1;AT1G52600.1	Peptidase S24/S26A/S26B/S26C family protein ; Peptidase S24/S26A/S26B/S26C family protein	4.6342	1;1	1;1	0	0	0	0	0	0	0	0	0	0	0	0	0	0	0	0	0	0	0	5135200
AT1G52670.1	Single hybrid motif superfamily protein	138.1	5	5	205630000	145010000	180690000	188550000	216960000	133000000	199640000	134090000	201570000	166650000	174220000	188990000	133670000	268050000	137490000	149750000	242970000	103370000	220040000	95163000
AT3G15610.1;AT1G52730.2;AT1G52730.1	Transducin/WD40 repeat-like superfamily protein ; Transducin/WD40 repeat-like superfamily protein ; Transducin/WD40 repeat-like superfamily protein	40.942	4;4;4	3;3;3	193190000	0	223140000	0	47714000	229030000	10574000	170780000	165580000	154010000	151670000	237510000	262480000	74830000	93966000	161950000	71382000	507000000	0	149130000
AT1G52740.1	histone H2A protein 9	21.223	3;1;1	1;0;0	0	0	0	0	0	0	0	0	0	0	0	0	0	0	0	23023000	0	0	0	0
AT1G52760.1	lysophospholipase 2	10.287	2	2	0	0	0	186330000	0	0	0	0	0	0	0	0	0	0	0	0	190230000	140340000	0	154670000
AT1G52780.1	Protein of unknown function (DUF2921)	20.855	1	1	0	0	0	0	0	0	0	0	0	0	0	0	0	0	0	0	0	0	0	9012300
AT1G52930.1	Ribosomal RNA processing Brix domain protein	8.8317	1	1	0	0	0	0	0	0	0	0	0	0	0	0	0	0	0	0	0	0	0	22271000
AT1G52980.1	GTP-binding family protein	2.7041	2	2	0	0	0	0	0	0	0	0	0	0	0	0	0	0	0	0	0	0	31764000	0
AT1G53000.1	Nucleotide-diphospho-sugar transferases superfamily protein	4.3457	1	1	0	0	0	0	0	0	0	0	0	0	0	0	0	0	0	0	0	0	0	65221000
AT1G53210.1	sodium/calcium exchanger family protein / calcium-binding EF hand family protein	17.833	3	3	66740000	63005000	74022000	0	72236000	89343000	97515000	81274000	0	73188000	0	65089000	79047000	43001000	78073000	188590000	0	70680000	0	0
AT1G53240.1	Lactate/malate dehydrogenase family protein	323.31	12	6	3752300000	3325400000	3787600000	3561300000	3918600000	3512200000	4800400000	3649400000	4247400000	4069300000	4198100000	3403600000	3730800000	5139800000	3742200000	3312000000	3960900000	4467100000	4070400000	2297500000
AT1G53280.1	Class I glutamine amidotransferase-like superfamily protein	6.452	4	4	0	142240000	146040000	0	0	0	48669000	126600000	0	0	156770000	0	156550000	103700000	97417000	0	0	0	0	0
AT1G53310.3;AT1G53310.2;AT1G53310.1	phosphoenolpyruvate carboxylase 1 ; phosphoenolpyruvate carboxylase 1 ; phosphoenolpyruvate carboxylase 1	323.31	36;36;36	14;14;14	3644200000	3572100000	4154400000	4196700000	5489200000	4177900000	5364000000	4261000000	4960300000	3926400000	4597000000	3362400000	3430200000	6740900000	4857500000	4864300000	5179800000	2625700000	3496700000	2938000000
AT1G53500.1	NAD-dependent epimerase/dehydratase family protein	4.0299	13	2	0	0	0	0	0	0	0	0	0	0	0	0	0	0	0	0	0	0	183880000	0
AT1G53580.2;AT1G53580.1	glyoxalase II 3 ; glyoxalase II 3	11.269	3;3	3;3	0	62896000	0	53458000	0	0	0	41556000	39498000	63665000	51044000	43624000	0	0	51777000	0	0	0	63483000	0
AT1G53645.1	hydroxyproline-rich glycoprotein family protein	29.331	4	4	73387000	65658000	74435000	66142000	0	0	0	91043000	0	0	115100000	70073000	80358000	78977000	56982000	84858000	129870000	78126000	0	0
AT1G53680.1	glutathione S-transferase TAU 28	5.1494	1	1	0	0	0	0	0	0	0	0	0	0	0	0	0	0	0	0	0	0	0	27459000
AT1G53750.1	regulatory particle triple-A 1A	122.49	15;1;1	15;1;1	1163500000	1090400000	1201900000	1276500000	2142000000	1651000000	1979400000	1499400000	1144500000	1112700000	1509000000	1153000000	1134500000	1249300000	1667100000	1614100000	1182700000	1461700000	1202400000	1740800000
AT1G53760.1;AT1G53760.2	unknown protein; FUNCTIONS IN: molecular_function unknown; INVOLVED IN: biological_process unknown; LOCATED IN: mitochondrion, plasma membrane, plastid, membrane; EXPRESSED IN: 25 plant structures; EXPRESSED DURING: 13 growth stages; CONTAINS InterPro DOM	13.441	2;1	2;1	0	0	0	0	0	0	0	0	0	0	0	0	0	0	0	60678000	0	0	0	0
AT1G53830.1	pectin methylesterase 2	31.832	4	3	0	0	0	0	0	0	0	0	0	0	0	0	0	0	0	0	0	0	0	42787000
AT1G53840.1	pectin methylesterase 1	4.6614	2	2	0	0	0	0	0	0	0	0	0	0	0	0	0	0	0	0	0	0	0	20742000
AT1G53850.2;AT1G53850.1	20S proteasome alpha subunit E1 ; 20S proteasome alpha subunit E1	198.36	9;9	2;2	954670000	851470000	955220000	986290000	1084000000	848750000	1251600000	1009600000	841160000	938340000	868130000	932550000	867960000	1197700000	1008700000	887550000	1095100000	949340000	967100000	747800000
AT1G54000.1	GDSL-like Lipase/Acylhydrolase superfamily protein	323.31	12	11	1754500000	1858500000	1992800000	1553400000	2235100000	2226100000	2453300000	1893400000	1744800000	2041200000	1912900000	2000500000	2479600000	3325200000	1750200000	1693900000	2859000000	2023000000	1966800000	2322600000
AT1G54010.1	GDSL-like Lipase/Acylhydrolase superfamily protein	195.51	11	10	515580000	444490000	562780000	543630000	766140000	691300000	569370000	487950000	512290000	540060000	537590000	505440000	623480000	890260000	524010000	485790000	471440000	542670000	523660000	427410000
AT1G54030.1	GDSL-like Lipase/Acylhydrolase superfamily protein	13.157	2	2	33435000	39958000	0	0	0	49801000	0	0	0	0	0	43322000	0	0	0	28470000	0	55268000	56244000	0
AT1G54080.1;AT1G54080.2	oligouridylate-binding protein 1A ; oligouridylate-binding protein 1A	48.008	2;2	1;1	0	0	0	0	0	0	0	0	0	0	0	0	0	0	0	0	0	0	18727000	0
AT1G54090.1	exocyst subunit exo70 family protein D2	12.228	1	1	0	0	0	0	0	0	0	0	0	0	0	0	0	0	0	0	0	0	11620000	0
AT1G54100.2;AT1G54100.1	aldehyde dehydrogenase 7B4 ; aldehyde dehydrogenase 7B4	323.31	13;13	13;13	676910000	756990000	839540000	758960000	764320000	705050000	1007600000	646050000	746250000	969650000	823670000	678690000	790800000	1054800000	734310000	590170000	691640000	717350000	809970000	889720000
AT1G54270.1;AT1G54270.2	eif4a-2 ; eif4a-2	323.31	21;20	6;6	4104700000	4011700000	4147600000	3429000000	3772800000	2929400000	5223200000	3460900000	4378600000	4422700000	4141700000	3699800000	3598800000	4672900000	3269900000	2962400000	4148700000	3431900000	4580000000	3910000000
AT1G54320.1	LEM3 (ligand-effect modulator 3) family protein / CDC50 family protein	7.0187	1	1	0	0	0	0	0	0	0	0	0	0	0	0	0	0	0	0	0	0	0	12363000
AT1G54410.1	dehydrin family protein	7.8659	1	1	0	0	0	0	0	0	0	0	0	0	0	0	0	0	0	0	0	0	415830000	0
AT1G54570.1	Esterase/lipase/thioesterase family protein	2.5323	1	1	0	0	0	0	0	0	0	0	0	0	0	0	0	0	0	0	0	0	0	4687100
AT1G54580.1	acyl carrier protein 2	77.843	2	1	1557200000	2999800000	1659200000	2244800000	859630000	100870000	1714400000	350440000	2733900000	2601200000	2129400000	1494400000	1416200000	0	1593100000	2316100000	414680000	113840000	1200800000	0
AT1G54630.1;AT1G54630.2	acyl carrier protein 3 ; acyl carrier protein 3	75.305	2;1	1;0	683430000	766580000	592420000	693470000	700590000	557990000	611710000	505300000	821210000	1037700000	663870000	640620000	658730000	719300000	571620000	649920000	197240000	667910000	628150000	648980000
AT1G54990.1	alpha/beta-Hydrolases superfamily protein	72.83	3	3	54323000	44429000	52648000	61804000	43575000	38721000	53264000	46790000	43100000	50974000	51290000	46874000	49342000	56241000	47451000	49317000	0	58501000	39031000	53537000
AT1G55020.1	lipoxygenase 1	43.525	6	6	0	152700000	97843000	68838000	68886000	0	0	53020000	154600000	132050000	96356000	76124000	93379000	55856000	57967000	85612000	0	69260000	82381000	0
AT1G55050.2;AT1G55050.1	unknown protein; FUNCTIONS IN: molecular_function unknown; INVOLVED IN: biological_process unknown; LOCATED IN: cellular_component unknown; EXPRESSED IN: cultured cell; BEST Arabidopsis thaliana protein match is: unknown protein (TAIR:AT1G09040.1); Has 30	-2	1;1	1;1	0	0	0	0	0	0	0	0	0	0	63227000	0	0	0	0	0	0	0	0	0
AT1G55200.1	Protein kinase protein with adenine nucleotide alpha hydrolases-like domain	3.622	1	1	0	0	0	0	0	0	0	0	0	0	0	0	0	0	0	0	0	1827000	0	0
AT1G55210.2;AT1G55210.1	Disease resistance-responsive (dirigent-like protein) family protein ; Disease resistance-responsive (dirigent-like protein) family protein	-2	1;1	1;1	0	0	0	0	0	0	0	0	0	0	0	0	0	0	0	0	0	0	0	35054000
AT1G55490.2;AT1G55490.1	chaperonin 60 beta ; chaperonin 60 beta	147.73	17;17	1;1	2991000000	2686200000	2409400000	2741500000	3448100000	2429300000	2561700000	2363000000	3086900000	2265200000	1950400000	2623600000	3070400000	3191400000	2173100000	2745300000	2790900000	2620100000	2238400000	2230000000
AT1G55850.1	cellulose synthase like E1	21.691	4	4	0	0	57273000	67718000	0	0	25588000	77777000	0	0	0	0	0	0	45780000	0	68732000	0	0	0
AT1G55860.2;AT1G55860.1	ubiquitin-protein ligase 1 ; ubiquitin-protein ligase 1	2.3661	6;6	1;1	0	0	0	0	0	0	0	0	0	0	0	0	0	0	0	0	1116500	0	0	0
AT1G55890.1	Tetratricopeptide repeat (TPR)-like superfamily protein	88.056	3	3	0	45662000	77285000	52800000	55698000	44447000	0	0	0	0	0	65776000	62857000	64688000	0	0	0	46475000	0	68519000
AT1G55900.2;AT1G55900.1	Haloacid dehalogenase-like hydrolase (HAD) superfamily protein ; Haloacid dehalogenase-like hydrolase (HAD) superfamily protein	28.066	1;1	1;1	0	0	0	0	0	0	0	0	0	0	0	0	0	0	0	0	0	0	0	22966000
AT1G56070.1	Ribosomal protein S5/Elongation factor G/III/V family protein	323.31	40	26	22513000000	19424000000	20734000000	19534000000	20631000000	17321000000	26201000000	17939000000	21169000000	19128000000	20319000000	18250000000	18861000000	31121000000	19475000000	16405000000	21588000000	19513000000	13783000000	17569000000
AT1G56110.1	homolog of nucleolar protein NOP56	323.31	16;6	16;6	1504100000	773730000	1853800000	1910800000	1708900000	1777800000	1772100000	1573100000	1314200000	728460000	1198800000	1455900000	1468300000	1890500000	1662200000	1065000000	1523200000	1924000000	733350000	1494700000
AT1G56190.2;AT1G56190.1	Phosphoglycerate kinase family protein ; Phosphoglycerate kinase family protein	11.633	7;7	2;2	59791000	52893000	49460000	47319000	58588000	40201000	61698000	37370000	60362000	0	36617000	53093000	47033000	62460000	0	0	39489000	54396000	0	0
AT1G56330.1;AT3G62560.1	secretion-associated RAS 1B ; Ras-related small GTP-binding family protein	209.11	9;5;1	4;0;0	1283900000	1044600000	1173500000	1379100000	1156000000	992290000	1309700000	990680000	1058300000	1379400000	1179000000	1462000000	1347800000	1272000000	1082900000	1266200000	1197400000	1344200000	670770000	1256400000
AT1G56340.1;AT1G56340.2	calreticulin 1a ; calreticulin 1a	211.73	13;12	9;8	1773200000	2043500000	2412800000	2309500000	2613700000	2420900000	3079700000	1996600000	1712400000	2026700000	2533900000	2147700000	2525300000	3932000000	2559400000	1738900000	2599600000	2089500000	1863200000	1632300000
AT1G56450.1	20S proteasome beta subunit G1	152.12	5	5	515730000	376220000	526980000	734620000	612270000	422350000	523860000	454360000	442160000	436690000	574380000	372900000	462170000	712050000	636550000	565350000	573200000	416070000	435330000	483850000
AT1G56550.1	RhamnoGalacturonan speci&#64257;c Xylosyltransferase 1	2.726	2	2	0	0	221520000	0	315170000	452130000	0	0	0	0	0	0	0	0	0	0	0	0	0	0
AT1G56560.1;AT3G05820.1	Plant neutral invertase family protein ; invertase H	8.3918	2;1	1;0	0	0	0	0	0	8935200	0	10419000	14214000	116420000	26214000	0	0	0	0	18948000	0	0	0	16202000
AT1G56680.1	Chitinase family protein	11.58	1	1	0	0	0	0	0	0	0	0	0	0	0	0	0	0	0	0	0	0	0	96373000
AT1G56700.2;AT1G56700.1	Peptidase C15, pyroglutamyl peptidase I-like ; Peptidase C15, pyroglutamyl peptidase I-like	30.359	3;3;1	3;3;1	36058000	0	0	36999000	38277000	21065000	0	0	0	46156000	0	0	0	0	0	0	0	36709000	46697000	29901000
AT1G57620.1	emp24/gp25L/p24 family/GOLD family protein	6.0083	1	1	0	0	0	0	0	0	0	0	0	0	0	0	0	0	0	0	0	0	0	8844700
AT1G57720.2;AT1G57720.1	Translation elongation factor EF1B, gamma chain ; Translation elongation factor EF1B, gamma chain	323.31	17;17	10;10	4663900000	4703100000	5301900000	5210800000	4169300000	4938600000	6565200000	4737700000	6222300000	4673600000	4908200000	3983100000	4788800000	6450300000	4434700000	4636400000	5431800000	6226900000	4362100000	4172700000
AT1G58080.1	ATP phosphoribosyl transferase 1	53.352	3	3	88238000	86894000	95595000	96209000	82001000	62086000	0	0	0	0	90279000	85127000	92506000	92943000	69486000	61738000	60991000	102550000	73420000	93079000
AT1G58270.1	TRAF-like family protein	88.998	6	6	335490000	712620000	484680000	470010000	707810000	781870000	674710000	497780000	535730000	602380000	378730000	475780000	414090000	368340000	585590000	749560000	453920000	553730000	777460000	647980000
AT1G59359.1;AT1G58983.1;AT1G58684.1;AT1G58380.1	Ribosomal protein S5 family protein ; Ribosomal protein S5 family protein ; Ribosomal protein S5 family protein ; Ribosomal protein S5 family protein	179.88	8;8;8;8	3;3;3;3	960610000	930240000	1127600000	1315400000	3313500000	3025800000	1674800000	2306000000	1248800000	1032700000	1178200000	1088500000	1161500000	2147600000	2091400000	2398100000	1658800000	1737100000	833470000	1753600000
AT1G59610.1	dynamin-like 3	32.176	14	3	107370000	100110000	110690000	167220000	78971000	106910000	52288000	100340000	73436000	100280000	0	108240000	106920000	57510000	94869000	110690000	0	206170000	0	178890000
AT1G59640.1;AT5G62610.1;AT1G59640.2	BIG PETAL P ; basic helix-loop-helix (bHLH) DNA-binding superfamily protein ; BIG PETAL P	2.5892	1;1;1	1;1;1	0	0	0	0	0	0	0	0	0	0	0	0	0	0	0	0	0	0	0	3520200
AT1G59870.1	ABC-2 and Plant PDR ABC-type transporter family protein	2.4597	6	2	0	0	18559000	0	0	0	0	0	0	0	0	0	71143000	0	0	0	32286000	0	0	0
AT1G59900.1	pyruvate dehydrogenase complex E1 alpha subunit	13.092	4	2	0	0	0	0	0	0	0	0	0	0	0	0	0	0	0	0	0	0	0	107300000
AT1G59960.1	NAD(P)-linked oxidoreductase superfamily protein	16.644	3	3	0	0	0	0	0	0	32381000	27635000	63411000	0	0	0	33787000	0	27965000	0	0	0	21577000	0
AT1G60070.1;AT1G60070.2	Adaptor protein complex AP-1, gamma subunit ; Adaptor protein complex AP-1, gamma subunit	59.329	6;6	5;5	124440000	146010000	116230000	117830000	99794000	133700000	157300000	76363000	107580000	55061000	94061000	88867000	119970000	155100000	82272000	89343000	138210000	121030000	100550000	74926000
AT1G60420.1	DC1 domain-containing protein	7.9198	2	2	0	0	0	0	0	0	0	0	0	0	0	0	0	0	0	0	0	32147000	0	0
AT1G60490.1	vacuolar protein sorting 34	2.1751	1	1	0	0	0	0	0	0	0	0	0	0	0	0	0	0	0	0	0	0	0	0
AT1G60640.5;AT1G60640.4;AT1G60640.3;AT1G60640.2;AT1G60640.1	unknown protein; FUNCTIONS IN: molecular_function unknown; INVOLVED IN: biological_process unknown; LOCATED IN: cellular_component unknown. ; unknown protein; FUNCTIONS IN: molecular_function unknown; INVOLVED IN: biological_process unknown; LOCATED IN: c	3.3755	1;1;1;1;1	1;1;1;1;1	0	0	0	0	0	0	0	0	0	0	0	0	0	0	0	0	0	0	0	17402000
AT1G60690.1	NAD(P)-linked oxidoreductase superfamily protein	1.8908	1	1	0	0	0	0	0	0	0	0	0	0	0	0	0	0	0	0	0	0	0	0
AT1G60710.1	NAD(P)-linked oxidoreductase superfamily protein	37.786	5;1;1	4;0;0	41169000	63691000	0	0	0	0	159280000	161670000	86128000	0	225860000	0	0	146320000	84380000	0	158570000	0	236890000	0
AT1G60770.1	Tetratricopeptide repeat (TPR)-like superfamily protein	13.934	5	5	0	0	51931000	0	30989000	103410000	80748000	31315000	0	77314000	0	47407000	74488000	56096000	68219000	0	0	0	0	0
AT1G60780.1	Clathrin adaptor complexes medium subunit family protein	6.0449	3	3	71067000	78940000	93981000	0	0	102080000	88855000	0	186050000	0	120970000	113150000	72382000	61624000	109160000	165000000	94464000	94666000	89839000	0
AT1G60810.1	ATP-citrate lyase A-2	1.7259	6	2	0	0	0	0	0	0	0	0	0	0	0	0	3318700000	0	0	0	0	0	0	0
AT1G61180.1;AT1G61180.2	LRR and NB-ARC domains-containing disease resistance protein ; LRR and NB-ARC domains-containing disease resistance protein	-2	1;1	1;1	0	0	0	0	0	0	0	0	0	0	0	0	0	0	0	0	0	0	60748000	0
AT1G61250.2;AT1G61250.1	secretory carrier 3 ; secretory carrier 3	20.656	2;2	2;2	0	0	0	0	0	0	0	0	0	0	0	0	0	0	0	0	0	47274000	0	0
AT1G61570.1	translocase of the inner mitochondrial membrane 13	89.393	3	3	244060000	240590000	202540000	343340000	157870000	353820000	268700000	212380000	245310000	226100000	164350000	272810000	152450000	133270000	224210000	104630000	0	319910000	0	190270000
AT1G61580.1	R-protein L3 B	31.659	9	5	97669000	101960000	285180000	0	0	107390000	15240000	203720000	0	128020000	126560000	120410000	159420000	63765000	126840000	30138000	142520000	94065000	134150000	115110000
AT1G61610.1	S-locus lectin protein kinase family protein	-2	1	1	0	0	0	0	0	0	0	0	0	0	0	0	58845000	0	0	0	0	0	0	0
AT1G61620.1	phosphoinositide binding	-2	1	1	0	0	0	0	0	0	0	0	0	0	0	0	0	0	0	0	0	0	0	54471000
AT1G61730.1	DNA-binding storekeeper protein-related transcriptional regulator	4.2128	1	1	0	0	0	0	0	0	0	0	0	0	0	0	0	0	0	0	0	25527000	0	0
AT1G61770.1	Chaperone DnaJ-domain superfamily protein	7.2703	1	1	0	0	0	0	0	0	0	0	0	0	0	0	0	0	0	0	0	0	0	21415000
AT1G61790.1	Oligosaccharyltransferase complex/magnesium transporter family protein	35.502	3	3	214360000	184440000	174990000	147910000	321200000	284600000	335240000	263360000	147770000	203380000	210260000	205220000	206100000	167890000	229450000	235420000	199010000	220620000	283210000	204570000
AT1G61870.1	pentatricopeptide repeat 336	4.3543	1	1	0	0	0	0	0	0	0	0	0	0	0	0	0	0	0	0	83452000	0	0	0
AT1G62020.1	Coatomer, alpha subunit	248.75	36	17	1857300000	1816400000	1684600000	2114800000	1569000000	1825400000	2573900000	1728200000	1921500000	1873200000	1675800000	1748200000	1974300000	2611000000	1713200000	2019800000	1806000000	1913000000	1448700000	1809900000
AT1G62040.1;AT2G05630.1;AT4G21980.1;AT1G62040.2;AT4G21980.2;AT2G05630.2	Ubiquitin-like superfamily protein ; Ubiquitin-like superfamily protein ; Ubiquitin-like superfamily protein ; Ubiquitin-like superfamily protein ; Ubiquitin-like superfamily protein ; Ubiquitin-like superfamily protein	5.1578	1;1;1;1;1;1	1;1;1;1;1;1	0	0	0	0	0	0	0	0	0	0	0	0	0	0	0	0	0	0	12687000	0
AT1G62180.2;AT1G62180.1	5adenylylphosphosulfate reductase 2 ; 5adenylylphosphosulfate reductase 2	7.748	2;2	2;2	0	0	0	0	0	0	0	0	0	0	0	0	0	0	14960000	0	0	0	0	0
AT1G62380.1	ACC oxidase 2	75.704	4	4	367270000	127390000	375390000	316670000	140410000	175820000	181200000	122350000	166210000	456150000	161200000	183950000	354250000	110310000	280790000	243580000	0	140890000	30978000	150540000
AT1G62390.1	Octicosapeptide/Phox/Bem1p (PB1) domain-containing protein / tetratricopeptide repeat (TPR)-containing protein	193.68	5	5	0	0	84779000	74626000	57243000	0	0	0	0	43486000	0	70777000	0	0	0	56808000	0	148730000	0	92893000
AT1G62480.1	Vacuolar calcium-binding protein-related	323.31	11	11	5267500000	3786600000	5094900000	4303700000	6842900000	4676700000	6954600000	4625800000	3340700000	3645700000	5254600000	4612200000	6715300000	6754800000	4199200000	5068800000	5726200000	5365000000	4333200000	5955600000
AT1G62600.1	Flavin-binding monooxygenase family protein	1.6515	1	1	0	0	0	0	0	0	0	3922700	0	0	0	0	0	0	0	0	0	0	0	0
AT1G62640.2;AT1G62640.1	3-ketoacyl-acyl carrier protein synthase III ; 3-ketoacyl-acyl carrier protein synthase III	138	6;6	6;6	314940000	302800000	259130000	336600000	309930000	234080000	267290000	235410000	196690000	249340000	219940000	272040000	299650000	373730000	213050000	242190000	239080000	147210000	228980000	229470000
AT1G62660.1	Glycosyl hydrolases family 32 protein	197.62	14;1	12;1	1084400000	1608400000	774300000	956710000	907110000	836070000	1308800000	853590000	1174000000	1502500000	951300000	889490000	1111100000	1211500000	877580000	1385900000	994050000	683180000	1227600000	736140000
AT1G62740.1	stress-inducible protein, putative	63.069	11	11	237840000	405800000	431270000	532480000	494980000	364290000	628510000	368610000	385490000	378030000	292570000	536870000	383400000	602180000	484450000	300230000	560190000	402220000	384910000	322790000
AT1G62750.1	Translation elongation factor EFG/EF2 protein	8.8397	2	2	0	0	0	0	0	0	0	0	0	0	0	0	0	0	0	11278000	0	0	0	0
AT1G62820.1	Calcium-binding EF-hand family protein	18.444	5	2	0	0	0	0	0	0	0	0	0	0	0	0	0	0	0	0	0	0	39512000	0
AT1G63000.1	nucleotide-rhamnose synthase/epimerase-reductase	258.5	13	12	1811800000	1766700000	2003500000	1318800000	2655800000	1852200000	2464600000	1751400000	2196500000	1820400000	1816700000	1298400000	1597900000	2184000000	1742100000	2425500000	2121000000	2435900000	1734200000	1233800000
AT1G63110.2;AT1G63110.3;AT1G63110.1	GPI transamidase subunit PIG-U ; GPI transamidase subunit PIG-U ; GPI transamidase subunit PIG-U	13.706	1;1;1	1;1;1	0	0	0	0	0	0	0	0	0	0	0	0	0	0	0	0	0	0	25837000	0
AT1G63160.1	replication factor C 2	3.036	1	1	0	0	0	0	0	0	0	0	0	0	0	0	0	0	0	4745200	0	0	0	0
AT1G63460.1	glutathione peroxidase 8	3.5185	1	1	0	0	0	0	0	0	0	0	0	0	0	0	0	0	0	0	0	0	0	14934000
AT1G63660.1;AT1G63660.2	GMP synthase (glutamine-hydrolyzing), putative / glutamine amidotransferase, putative ; GMP synthase (glutamine-hydrolyzing), putative / glutamine amidotransferase, putative	232.3	13;10	13;10	497820000	468100000	524080000	442010000	436090000	358580000	459830000	321320000	480290000	549270000	430990000	423000000	455720000	641930000	363220000	382820000	244590000	514980000	332910000	452760000
AT1G63680.1	acid-amino acid ligases;ligases;ATP binding;ATP binding;ligases	3.4805	1	1	0	0	0	0	0	0	0	0	0	0	0	0	0	0	0	0	0	3127000	0	0
AT1G63770.4;AT1G63770.2;AT1G63770.3;AT1G63770.5;AT1G63770.1	Peptidase M1 family protein ; Peptidase M1 family protein ; Peptidase M1 family protein ; Peptidase M1 family protein ; Peptidase M1 family protein	323.31	24;24;24;24;23	24;24;24;24;23	1194400000	1316200000	1249400000	1326600000	1232900000	991710000	1427400000	1043200000	1035500000	1210100000	1093500000	1012300000	977430000	1502100000	1135200000	1316900000	1150500000	1238600000	854620000	1165200000
AT1G63780.1	Ribosomal RNA processing Brix domain protein	11.203	2	2	0	0	0	0	0	0	0	26609000	0	0	0	0	0	0	0	0	0	0	0	0
AT1G63940.1;AT1G63940.2;AT1G63940.4;AT1G63940.3	monodehydroascorbate reductase 6 ; monodehydroascorbate reductase 6 ; monodehydroascorbate reductase 6 ; monodehydroascorbate reductase 6	265.7	17;17;16;13	17;17;16;13	1653900000	1995600000	2025900000	1476800000	1926500000	1238600000	2801000000	1575200000	1854200000	1942800000	2272200000	1602400000	1994300000	2385100000	1751400000	2117800000	1740600000	1407800000	1835400000	1381300000
AT1G64090.1;AT1G64090.2	Reticulan like protein B3 ; Reticulan like protein B3	17.137	3;3	3;3	104980000	158820000	159370000	306150000	155180000	191630000	251400000	206030000	199610000	167860000	212830000	157780000	134530000	110270000	173700000	95761000	186170000	148420000	165730000	0
AT1G64190.1	6-phosphogluconate dehydrogenase family protein	129.71	16	7	554660000	539120000	565060000	710450000	856430000	840170000	820170000	674220000	650830000	504990000	866170000	591600000	593260000	682300000	633980000	663540000	651690000	612950000	512190000	617780000
AT1G64255.1	MuDR family transposase	1.6014	2	2	0	0	0	0	0	0	0	0	0	0	0	0	0	0	0	0	0	29760000	0	0
AT1G64310.1	Tetratricopeptide repeat (TPR)-like superfamily protein	-2	1	1	0	0	0	0	0	0	0	0	0	0	0	0	0	0	0	0	0	13222000	0	0
AT1G64350.1	Transducin/WD40 repeat-like superfamily protein	10.632	1	1	0	0	0	0	0	0	0	0	0	0	0	0	0	0	0	0	0	0	0	16402000
AT1G64440.1	NAD(P)-binding Rossmann-fold superfamily protein	14.057	2	2	0	0	0	0	0	0	0	0	0	0	0	0	0	0	0	0	0	0	68833000	0
AT1G64520.1	regulatory particle non-ATPase 12A	113.63	13;1	13;1	650070000	690330000	980090000	1016000000	885750000	776580000	1145000000	843590000	818440000	565470000	943930000	873530000	1093900000	1197800000	838130000	772070000	919440000	718810000	724170000	390450000
AT1G64550.1	general control non-repressible 3	56.221	5	5	168120000	97236000	107930000	106900000	180210000	171790000	275390000	77686000	140430000	90315000	121610000	184390000	136850000	265730000	146430000	103430000	212970000	153260000	70423000	96566000
AT1G64640.1	early nodulin-like protein 8	2.958	1	1	0	0	0	0	0	0	0	0	0	0	0	0	0	0	0	0	0	0	179840000	0
AT1G64650.1;AT1G64650.2	Major facilitator superfamily protein ; Major facilitator superfamily protein	26.035	3;2	2;2	97190000	74107000	96642000	0	95471000	100180000	53671000	102610000	85371000	120070000	88044000	108410000	120030000	69144000	92742000	144780000	83494000	105250000	208700000	102260000
AT1G64790.1;AT1G64790.2	ILITYHIA ; ILITYHIA	323.31	31;30	31;30	705320000	508050000	667140000	838250000	627080000	507070000	664230000	521250000	724290000	689290000	638790000	619450000	765480000	765790000	519770000	593580000	543840000	647010000	357880000	748750000
AT1G64880.1	Ribosomal protein S5 family protein	20.011	2	2	44045000	47313000	49857000	0	0	46974000	62211000	0	52752000	0	0	0	0	0	0	0	83321000	0	0	57735000
AT1G64950.1;AT2G12190.1	cytochrome P450, family 89, subfamily A, polypeptide 5 ; Cytochrome P450 superfamily protein	22.607	3;2;1;1	3;2;1;1	0	0	454890000	0	43003000	158560000	19438000	160680000	0	60760000	124260000	0	84886000	61056000	0	58718000	0	54537000	73137000	0
AT1G64980.1	Nucleotide-diphospho-sugar transferases superfamily protein	17.313	4	4	150180000	135920000	113420000	137460000	134880000	0	76399000	98738000	113720000	132230000	114550000	102270000	110760000	0	0	125030000	0	0	0	129660000
AT1G65010.1	Plant protein of unknown function (DUF827)	12.33	5	5	21635000	27569000	0	0	0	0	0	25571000	91771000	0	0	23687000	0	0	0	0	0	46875000	0	0
AT1G65030.1	Transducin/WD40 repeat-like superfamily protein	12.247	2	2	0	0	0	0	0	0	0	0	0	0	0	0	0	0	0	11361000	0	0	0	0
AT1G65220.1	ARM repeat superfamily protein	27.165	7	4	47119000	31679000	33664000	44120000	0	37359000	32780000	37922000	41906000	46302000	47018000	42796000	57504000	52183000	40148000	47958000	0	58676000	39734000	37832000
AT1G65270.3;AT1G65270.2;AT1G65270.1	unknown protein; FUNCTIONS IN: molecular_function unknown; INVOLVED IN: biological_process unknown; LOCATED IN: endoplasmic reticulum, plasma membrane; EXPRESSED IN: 24 plant structures; EXPRESSED DURING: 13 growth stages; Has 35333 Blast hits to 34131 pr	12.807	2;2;2	2;2;2	0	0	104840000	0	0	0	0	0	0	0	0	94337000	0	0	0	0	0	94873000	0	0
AT1G65290.1	mitochondrial acyl carrier protein 2	7.4146	1	1	0	0	0	0	0	0	0	0	0	0	0	0	0	0	0	0	0	0	0	39206000
AT1G65310.1	xyloglucan endotransglucosylase/hydrolase 17	37.864	4;1;1;1	2;0;0;0	317840000	361620000	236910000	244110000	323620000	284070000	289010000	223990000	396530000	536200000	161150000	173950000	206850000	389600000	233290000	377220000	434000000	309090000	348030000	239410000
AT1G65440.3;AT1G65440.2;AT1G65440.1	global transcription factor group B1 ; global transcription factor group B1 ; global transcription factor group B1	3.0687	1;1;1	1;1;1	0	0	0	0	0	0	0	0	0	0	0	0	0	0	0	0	0	17365000	0	0
AT1G65470.2;AT1G65470.1	chromatin assembly factor-1 (FASCIATA1) (FAS1) ; chromatin assembly factor-1 (FASCIATA1) (FAS1)	1.6746	2;2	2;2	0	62971000	0	0	0	0	0	103640000	0	0	0	0	0	0	0	0	0	0	0	0
AT1G65570.1	Pectin lyase-like superfamily protein	3.0955	1	1	0	0	0	0	0	0	0	0	0	0	0	0	0	0	0	0	0	12600000	0	0
AT1G65650.1	Peptidase C12, ubiquitin carboxyl-terminal hydrolase 1	110.37	5	5	78060000	82019000	102290000	96780000	90782000	69113000	72440000	77446000	98024000	101770000	96903000	95292000	99050000	109680000	70302000	76833000	98985000	89486000	52316000	125620000
AT1G65700.2;AT1G65700.1;AT1G65700.3	Small nuclear ribonucleoprotein family protein ; Small nuclear ribonucleoprotein family protein ; Small nuclear ribonucleoprotein family protein	323.31	1;1;1	1;1;1	114530000	153220000	112020000	234810000	0	42765000	194870000	130160000	0	0	0	0	0	0	0	0	53412000	0	145440000	0
AT1G65930.1	cytosolic NADP+-dependent isocitrate dehydrogenase	323.31	16;3	13;1	7165500000	7236100000	7325500000	7628000000	8882000000	8348500000	8223400000	8108900000	10404000000	8268000000	8501900000	7923100000	7290200000	4349600000	8994900000	8054900000	6190500000	6187300000	9289400000	6724200000
AT1G65960.2;AT1G65960.1	glutamate decarboxylase 2 ; glutamate decarboxylase 2	6.0016	4;2	2;2	0	0	0	0	0	0	0	0	0	0	0	0	0	0	0	45990000	0	0	0	0
AT1G65980.1;AT1G65980.2	thioredoxin-dependent peroxidase 1 ; thioredoxin-dependent peroxidase 1	124.57	5;4	5;4	1007200000	837250000	907850000	757670000	985000000	701600000	861160000	687780000	1243100000	1181200000	819250000	977750000	671820000	1485800000	917470000	557590000	742390000	735850000	1215200000	537270000
AT1G66070.2;AT1G66070.1	Translation initiation factor eIF3 subunit ; Translation initiation factor eIF3 subunit	2.8268	1;1	1;1	0	0	0	0	0	0	0	0	0	0	0	0	0	0	0	0	0	0	0	67126000
AT1G66200.1;AT1G66200.3;AT1G66200.2	glutamine synthase clone F11 ; glutamine synthase clone F11 ; glutamine synthase clone F11	323.31	16;14;9	5;5;5	2409000000	4009800000	2593800000	2184300000	2039200000	1494400000	3709400000	2167600000	3180100000	3676900000	4969500000	2946700000	1853000000	2388800000	3164200000	2737500000	2314500000	2091200000	2820700000	2194000000
AT1G66240.1;AT1G66240.2	homolog of anti-oxidant 1 ; homolog of anti-oxidant 1	44.025	5;4	5;4	872740000	1104300000	594130000	645620000	1195100000	1120500000	561640000	914400000	1147900000	1375500000	927650000	1006800000	712000000	1310600000	1637300000	1600700000	1573600000	679380000	1253300000	848330000
AT1G66260.2;AT1G66260.1	RNA-binding (RRM/RBD/RNP motifs) family protein ; RNA-binding (RRM/RBD/RNP motifs) family protein	8.3886	1;1	1;1	0	0	0	0	0	0	0	0	0	0	0	0	0	0	0	0	0	0	0	48148000
AT1G66270.1;AT1G66270.2	Glycosyl hydrolase superfamily protein ; Glycosyl hydrolase superfamily protein	323.31	20;19;1;1;1;1	14;13;0;0;0;0	2811100000	4276400000	3768800000	3072600000	3617400000	3124800000	3446600000	2741400000	3800100000	3208900000	2555700000	3146400000	3699400000	5475600000	3237300000	3317700000	3835600000	3292900000	3457200000	3574200000
AT1G66280.1	Glycosyl hydrolase superfamily protein	266.55	14	9	851790000	939890000	878360000	788300000	959540000	914980000	699180000	827210000	1053000000	667680000	920490000	879840000	831870000	1116300000	817400000	1108900000	983700000	694260000	692690000	982690000
AT5G37780.1;AT1G66410.1;AT1G66410.2;AT5G37780.2;AT5G37780.3	calmodulin 1 ; calmodulin 4 ; calmodulin 4 ; calmodulin 1 ; calmodulin 1	54.458	6;6;6;6;6	2;2;2;2;2	0	0	135720000	0	461420000	125190000	0	287380000	665640000	0	589180000	318910000	0	0	494800000	301680000	452150000	450770000	0	271670000
AT1G66430.1	pfkB-like carbohydrate kinase family protein	9.997	1	1	9971000	9493500	0	8029500	0	0	0	0	0	23324000	0	8623700	10719000	0	0	8897600	0	0	0	0
AT1G66530.1	Arginyl-tRNA synthetase, class Ic	70.633	7	4	52733000	52180000	57242000	72009000	54604000	44423000	67788000	33410000	50889000	0	51463000	51994000	64759000	69791000	40088000	49348000	38253000	69111000	51422000	70101000
AT1G66580.1	senescence associated gene 24	102.38	9	3	3269000000	3225700000	3005200000	4036900000	1281700000	5857700000	3481400000	5742300000	3825800000	2341400000	4708600000	3727700000	3255200000	896740000	3333100000	2334300000	3097300000	4191500000	4774300000	4371100000
AT1G66680.1	S-adenosyl-L-methionine-dependent methyltransferases superfamily protein	72.587	7	7	0	0	0	128850000	0	0	176120000	144790000	127040000	0	131000000	129490000	154960000	125350000	101590000	170350000	133180000	108090000	146450000	141200000
AT1G67120.1	ATPases;nucleotide binding;ATP binding;nucleoside-triphosphatases;transcription factor binding	30.997	7	7	718020000	309290000	0	653130000	393420000	441700000	655080000	299830000	0	551220000	481480000	492560000	567120000	593850000	421050000	356280000	0	551020000	0	598390000
AT1G67140.1;AT1G67140.2;AT1G67140.3	HEAT repeat-containing protein ; HEAT repeat-containing protein ; HEAT repeat-containing protein	30.771	2;2;2	2;2;2	0	9494500	0	10376000	10854000	0	0	8918700	10351000	17335000	10152000	8411800	9701600	0	8651400	9892400	0	0	0	0
AT1G67230.1	little nuclei1	66.879	5	5	63861000	0	76849000	0	0	79895000	0	188550000	0	143940000	293830000	101890000	130290000	21100000	53332000	20650000	68133000	63752000	125260000	0
AT1G67330.1	Protein of unknown function (DUF579)	21.752	2	2	0	0	0	0	0	0	0	0	81346000	0	42832000	45126000	0	0	0	0	0	0	37808000	36982000
AT1G67350.2;AT1G67350.1	unknown protein; FUNCTIONS IN: molecular_function unknown; INVOLVED IN: photorespiration; LOCATED IN: mitochondrial membrane, mitochondrial respiratory chain complex I, respiratory chain complex I; EXPRESSED IN: 24 plant structures; EXPRESSED DURING: 15 g	3.8956	2;2	2;2	0	0	0	0	0	0	0	0	0	0	0	0	0	0	0	0	0	101920000	0	0
AT1G67360.2;AT1G67360.1	Rubber elongation factor protein (REF) ; Rubber elongation factor protein (REF)	2.9371	1;1	1;1	0	0	0	0	0	0	0	0	0	0	0	0	0	0	0	0	0	0	0	15471000
AT1G67410.1	Exostosin family protein	1.8962	1	1	0	0	0	0	0	0	0	0	0	0	0	0	0	0	0	0	0	0	8431400	0
AT1G67680.1	SRP72 RNA-binding domain	104.47	11;3	11;3	513290000	608020000	327310000	456810000	266970000	339550000	289890000	350870000	400930000	357780000	305380000	366530000	368210000	358700000	323220000	338710000	358150000	316130000	378940000	449560000
AT1G67730.1	beta-ketoacyl reductase 1	38.549	5	5	123630000	137780000	126070000	171340000	291800000	136010000	214810000	154320000	142510000	146110000	96362000	125360000	131690000	247580000	191730000	202310000	226530000	138430000	87113000	132320000
AT1G67930.1	Golgi transport complex protein-related	2.4373	2	2	0	0	0	0	0	0	0	0	0	0	0	0	0	0	22835000	0	0	0	0	0
AT1G68310.2;AT1G68310.1	Protein of unknown function (DUF59) ; Protein of unknown function (DUF59)	5.7338	1;1	1;1	0	0	0	0	0	0	0	0	0	0	0	0	0	0	0	0	0	32717000	0	0
AT1G68560.1	alpha-xylosidase 1	139.82	14;2	14;2	512590000	331840000	472240000	446090000	501530000	455180000	472260000	458900000	625080000	642730000	404030000	501780000	533100000	751060000	394160000	480430000	376640000	518100000	348550000	395610000
AT1G68680.1	unknown protein; FUNCTIONS IN: molecular_function unknown; INVOLVED IN: biological_process unknown; LOCATED IN: chloroplast; EXPRESSED IN: 23 plant structures; EXPRESSED DURING: 16 growth stages; Has 20 Blast hits to 20 proteins in 11 species: Archae - 0;	1.9261	1	1	0	0	0	0	0	0	0	0	0	0	0	0	0	0	0	0	0	0	0	30219000
AT1G69250.2;AT1G69250.1	Nuclear transport factor 2 (NTF2) family protein with RNA binding (RRM-RBD-RNP motifs) domain ; Nuclear transport factor 2 (NTF2) family protein with RNA binding (RRM-RBD-RNP motifs) domain	47.696	6;6	6;6	133440000	70675000	183000000	175120000	124860000	114650000	195340000	128200000	162820000	99754000	192260000	136270000	146230000	132270000	83716000	118710000	133440000	243740000	170340000	143640000
AT1G69410.1	eukaryotic elongation factor 5A-3	173.01	7	4	910100000	997210000	853230000	860970000	116090000	1169600000	30078000	641280000	1119200000	853080000	1135600000	1210700000	994770000	220470000	373680000	621690000	508030000	1365200000	1044500000	1403500000
AT1G69460.1	emp24/gp25L/p24 family/GOLD family protein	4.591	1	1	0	0	0	0	0	0	0	0	0	0	0	0	0	0	0	0	0	0	0	69072000
AT1G69510.3;AT1G69510.2;AT1G69510.1	cAMP-regulated phosphoprotein 19-related protein ; cAMP-regulated phosphoprotein 19-related protein ; cAMP-regulated phosphoprotein 19-related protein	22.725	4;4;4	3;3;3	145700000	219710000	76387000	0	61408000	131960000	0	0	0	0	275370000	72967000	0	29548000	138930000	11324000	0	0	0	0
AT1G69620.1	ribosomal protein L34	15.295	4	2	863490000	0	0	1013500000	2874500000	2917000000	2705800000	1939100000	690590000	0	0	847180000	1112900000	557900000	0	2884100000	0	913940000	0	0
AT1G69700.1	HVA22 homologue C	7.0037	1	1	0	0	0	0	0	0	0	0	0	0	0	0	0	0	0	0	0	3411300	0	0
AT1G69960.1	serine/threonine protein phosphatase 2A	16.461	2	1	0	0	0	0	0	0	0	0	0	0	0	0	0	0	0	0	0	0	0	4293200
AT1G70190.2;AT1G70190.1	Ribosomal protein L7/L12, oligomerisation;Ribosomal protein L7/L12, C-terminal/adaptor protein ClpS-like ; Ribosomal protein L7/L12, oligomerisation;Ribosomal protein L7/L12, C-terminal/adaptor protein ClpS-like	22.058	1;1	1;1	0	0	0	0	0	0	0	0	0	0	0	0	0	0	0	0	0	31686000	0	0
AT1G70310.1	spermidine synthase 2	42.8	9	6	118060000	126490000	158550000	148250000	183780000	220770000	236540000	168320000	120650000	153480000	135900000	155420000	168210000	160820000	168660000	236960000	206330000	245690000	133960000	203760000
AT1G70320.1	ubiquitin-protein ligase 2	47.389	11	6	121390000	144260000	147730000	200350000	57983000	119190000	130520000	109320000	141470000	167150000	158040000	170750000	240410000	62541000	67883000	128790000	70553000	161200000	0	234080000
AT1G70410.3;AT1G70410.1;AT1G70410.2	beta carbonic anhydrase 4 ; beta carbonic anhydrase 4 ; beta carbonic anhydrase 4	75.147	5;5;5	5;5;5	326560000	720200000	585580000	287560000	284350000	218140000	133460000	340690000	666090000	606770000	537260000	429620000	440710000	577960000	399310000	565250000	573870000	495050000	957510000	281500000
AT1G70560.1	tryptophan aminotransferase of Arabidopsis 1	2.878	1	1	0	0	0	0	0	0	0	0	0	0	0	0	0	0	0	0	0	0	0	12536000
AT1G70580.4;AT1G70580.3;AT1G70580.2;AT1G70580.1;AT1G23310.2;AT1G23310.1	alanine-2-oxoglutarate aminotransferase 2 ; alanine-2-oxoglutarate aminotransferase 2 ; alanine-2-oxoglutarate aminotransferase 2 ; alanine-2-oxoglutarate aminotransferase 2 ; glutamate:glyoxylate aminotransferase ; glutamate:glyoxylate aminotransferase	43.353	5;5;5;5;4;4	5;5;5;5;4;4	128090000	98624000	0	0	98485000	42421000	171570000	0	0	129340000	0	83418000	0	0	0	80256000	0	0	0	0
AT1G70730.1;AT1G70730.3;AT1G70730.2	Phosphoglucomutase/phosphomannomutase family protein ; Phosphoglucomutase/phosphomannomutase family protein ; Phosphoglucomutase/phosphomannomutase family protein	54.306	16;16;15	9;9;8	291640000	260470000	224500000	277490000	231820000	182410000	243980000	167990000	216900000	422270000	205270000	206970000	248910000	320840000	207240000	264220000	143890000	216140000	222640000	221350000
AT1G70770.2;AT1G70770.1	Protein of unknown function DUF2359, transmembrane ; Protein of unknown function DUF2359, transmembrane	181.39	16;16	14;14	1271200000	1427000000	1492000000	1268700000	1101000000	872030000	1688900000	1152000000	1374100000	1816500000	1370000000	1235300000	1213900000	1780100000	1082100000	1247200000	1497300000	1262500000	1049600000	1226900000
AT1G70850.3;AT1G70850.1;AT1G70850.2	MLP-like protein 34 ; MLP-like protein 34 ; MLP-like protein 34	141.62	9;9;5;2;2;2;2;1;1	8;8;4;2;2;2;2;1;1	395460000	1356100000	663470000	460760000	477310000	318690000	605900000	657780000	1124300000	1175100000	1173600000	554170000	399950000	505170000	917490000	892370000	298680000	191840000	1075200000	403110000
AT1G71040.1	Cupredoxin superfamily protein	4.5314	1	1	0	0	0	0	0	0	0	0	0	0	0	0	0	0	0	0	0	3916500	0	0
AT1G71220.1;AT1G71220.2	UDP-glucose:glycoprotein glucosyltransferases;transferases, transferring hexosyl groups;transferases, transferring glycosyl groups ; UDP-glucose:glycoprotein glucosyltransferases;transferases, transferring hexosyl groups;transferases, transferring glycosy	62.245	12;12	12;12	234970000	288610000	393870000	368900000	301270000	211650000	403800000	262110000	224020000	331610000	347820000	324690000	334240000	453960000	255250000	239990000	327210000	284150000	213660000	303880000
AT1G71270.1	Vps52 / Sac2 family	6.5643	2	2	0	0	0	0	0	0	0	0	0	0	0	0	0	0	0	2944300	0	7186200	0	0
AT1G71320.1	F-box family protein	1.6697	1	1	0	0	0	0	0	0	0	0	0	0	0	0	0	0	0	0	0	0	0	176190000
AT1G71697.1	choline kinase 1	4.4432	1	1	0	0	0	0	0	0	0	0	0	0	0	0	0	0	0	0	0	0	0	5322500
AT1G71730.1	unknown protein; Has 52 Blast hits to 52 proteins in 24 species: Archae - 0; Bacteria - 0; Metazoa - 4; Fungi - 0; Plants - 41; Viruses - 0; Other Eukaryotes - 7 (source: NCBI BLink).	27.377	1	1	0	0	0	0	0	0	0	0	0	0	0	0	0	0	0	0	0	0	10878000	0
AT1G71860.3;AT1G71860.1;AT1G71860.2	protein tyrosine phosphatase 1 ; protein tyrosine phosphatase 1 ; protein tyrosine phosphatase 1	7.0652	4;4;3	4;4;3	0	0	0	143110000	0	0	0	0	0	0	96812000	0	75005000	0	0	0	0	0	116220000	122670000
AT5G10330.3;AT1G71920.3;AT1G71920.1;AT5G10330.2;AT5G10330.1;AT1G71920.2	histidinol phosphate aminotransferase 1 ; HISTIDINE BIOSYNTHESIS 6B ; HISTIDINE BIOSYNTHESIS 6B ; histidinol phosphate aminotransferase 1 ; histidinol phosphate aminotransferase 1 ; HISTIDINE BIOSYNTHESIS 6B	17.46	3;3;3;3;3;3	3;3;3;3;3;3	18225000	15951000	20484000	12940000	16172000	0	15594000	11222000	0	19439000	24319000	14713000	19730000	18135000	15528000	14855000	13465000	14493000	0	0
AT1G72150.1	PATELLIN 1	125.29	17	15	743460000	810690000	720040000	990640000	1287200000	1204800000	1003900000	853430000	738320000	694430000	976060000	860430000	882440000	812290000	1106800000	1133600000	1422200000	1002400000	993560000	1003200000
AT1G72160.1	Sec14p-like phosphatidylinositol transfer family protein	196.08	3	3	67577000	126500000	112000000	116060000	98698000	53435000	130870000	91308000	69088000	119540000	116580000	123330000	106420000	164900000	67967000	154920000	0	75317000	135000000	78995000
AT1G72170.1	Domain of unknown function (DUF543)	12.839	1	1	0	0	0	0	0	0	0	0	0	0	0	0	0	0	0	0	0	0	0	40592000
AT1G72370.2;AT1G72370.1	40s ribosomal protein SA ; 40s ribosomal protein SA	249.09	11;11;3;3	11;11;3;3	4970700000	4738900000	5813900000	4938500000	7555100000	6000300000	9486600000	6021600000	5066200000	3864700000	5380500000	3993600000	4478700000	7443700000	7042900000	6016700000	8173700000	5112500000	6077400000	4285000000
AT1G72440.1	CCAAT-binding factor	3.5109	2	2	0	0	0	0	0	0	0	0	0	0	0	0	0	0	0	0	0	0	0	55903000
AT1G72470.1	exocyst subunit exo70 family protein D1	16.587	2	2	0	8143100	22241000	22806000	15576000	9385700	17984000	10441000	16587000	28229000	12289000	15626000	19399000	31056000	12106000	13755000	0	20386000	0	12242000
AT1G72550.2;AT1G72550.1	tRNA synthetase beta subunit family protein ; tRNA synthetase beta subunit family protein	44.602	10;10	10;10	263940000	160490000	273260000	304570000	407470000	278150000	231900000	256920000	189980000	148470000	208290000	245490000	240960000	434590000	365470000	264470000	282830000	276940000	151250000	314410000
AT1G72560.3;AT1G72560.2;AT1G72560.1	ARM repeat superfamily protein ; ARM repeat superfamily protein ; ARM repeat superfamily protein	4.1881	1;1;1	1;1;1	0	0	0	0	0	0	0	0	0	0	0	0	0	0	0	0	0	0	0	12720000
AT1G72680.1	cinnamyl-alcohol dehydrogenase	143.05	7	7	222200000	190360000	234710000	290280000	273420000	247740000	355020000	308600000	265140000	175350000	248070000	194750000	220670000	134010000	266920000	220300000	186790000	192900000	197800000	211660000
AT1G72730.1	DEA(D/H)-box RNA helicase family protein	14.755	15	4	0	37820000	68780000	37732000	0	48976000	196860000	113140000	125910000	81830000	132400000	93895000	0	166230000	132080000	28256000	286200000	0	344730000	0
AT1G72750.1	translocase inner membrane subunit 23-2	32.933	2	2	127670000	107830000	92934000	201780000	218550000	164100000	158840000	128710000	0	72639000	0	148800000	108700000	195710000	0	137220000	127970000	116940000	0	139150000
AT1G73180.2;AT1G73180.1	Eukaryotic translation initiation factor eIF2A family protein ; Eukaryotic translation initiation factor eIF2A family protein	6.45	3;3	3;3	0	0	0	0	0	0	0	0	0	0	0	0	0	0	0	0	0	111350000	0	0
AT1G73230.1	Nascent polypeptide-associated complex NAC	114.23	9	7	811950000	693190000	932410000	1079100000	914500000	601760000	938530000	717800000	831830000	657350000	875350000	761110000	896040000	1376400000	687830000	747650000	1030000000	702640000	385390000	510350000
AT1G73250.1	GDP-4-keto-6-deoxymannose-3,5-epimerase-4-reductase 1	5.3588	3	2	0	0	0	0	0	0	0	18780000	0	0	0	0	0	0	0	0	0	0	0	0
AT1G73430.2;AT1G73430.1	sec34-like family protein ; sec34-like family protein	7.6519	2;2	2;2	0	0	0	0	0	0	0	0	0	0	0	0	0	0	0	0	0	0	29514000	0
AT1G73600.1;AT1G73600.2	S-adenosyl-L-methionine-dependent methyltransferases superfamily protein ; S-adenosyl-L-methionine-dependent methyltransferases superfamily protein	17.704	2;2	1;1	0	0	0	0	0	0	0	0	0	0	0	0	0	0	0	0	0	0	0	66054000
AT1G73620.1	Pathogenesis-related thaumatin superfamily protein	21.319	3;1;1	3;1;1	87458000	94401000	94779000	0	59131000	0	0	0	0	109900000	0	81022000	55789000	83077000	0	0	101620000	0	0	97131000
AT1G73720.1	transducin family protein / WD-40 repeat family protein	4.0485	2	2	0	0	0	0	0	0	0	0	0	0	0	0	0	0	0	0	0	33293000	0	0
AT1G73940.1	unknown protein; BEST Arabidopsis thaliana protein match is: unknown protein (TAIR:AT5G49410.2); Has 54 Blast hits to 54 proteins in 11 species: Archae - 0; Bacteria - 0; Metazoa - 0; Fungi - 0; Plants - 54; Viruses - 0; Other Eukaryotes - 0 (source: NCBI	35.159	4	4	0	104500000	0	0	0	0	0	123710000	0	0	0	0	0	0	83058000	0	0	0	97749000	0
AT1G74020.1	strictosidine synthase 2	12.814	3;1	3;1	0	0	0	113520000	77474000	0	119270000	57203000	0	102620000	122430000	70735000	0	117310000	65951000	82390000	0	0	76075000	0
AT1G74030.1	enolase 1	267.62	11	11	775680000	788730000	705910000	753710000	991330000	473630000	1168600000	669240000	691500000	658650000	724160000	741990000	744930000	1371700000	809860000	966240000	981120000	693470000	869710000	620070000
AT1G74040.1	2-isopropylmalate synthase 1	7.5434	5	1	0	30958000	0	0	37678000	0	0	22062000	35307000	47598000	34909000	0	41091000	52764000	30104000	27190000	0	36587000	0	32764000
AT1G74060.1;AT1G74050.1	Ribosomal protein L6 family protein ; Ribosomal protein L6 family protein	114.62	11;11	4;4	5104400000	4723800000	5114200000	5097300000	7221100000	8702200000	6675000000	6917000000	5459900000	3710300000	4894500000	5297100000	5469100000	1076700000	3642900000	6540400000	4552500000	6808100000	6748600000	7139000000
AT1G74100.1	sulfotransferase 16	1.6436	1	1	0	0	0	0	0	0	0	0	0	0	0	0	0	0	0	0	0	0	9903600	0
AT1G74230.1	glycine-rich RNA-binding protein 5	5.94	1	1	0	0	0	0	0	0	0	0	0	0	0	0	0	0	0	0	0	0	0	25042000
AT1G74250.1	DNAJ heat shock N-terminal domain-containing protein	10.509	1	1	0	0	0	0	0	0	0	0	0	0	0	0	0	0	0	0	0	18132000	0	0
AT1G74260.1	purine biosynthesis 4	236.55	17	17	544540000	435480000	595570000	539570000	631260000	439260000	666220000	463180000	469770000	504680000	295450000	455800000	544160000	692280000	517400000	463310000	674230000	466450000	304400000	427680000
AT1G74380.1;AT5G07720.1;AT1G18690.1	xyloglucan xylosyltransferase 5 ; Galactosyl transferase GMA12/MNN10 family protein ; Galactosyl transferase GMA12/MNN10 family protein	1.8745	2;1;1	2;1;1	0	0	0	0	0	0	0	0	0	0	0	0	0	0	0	0	0	0	42790000	0
AT1G74560.1;AT1G74560.3;AT1G74560.2	NAP1-related protein 1 ; NAP1-related protein 1 ; NAP1-related protein 1	100.37	8;8;7	5;5;4	367980000	328620000	437180000	514790000	682560000	689610000	726480000	609400000	464610000	426230000	468400000	537220000	600080000	512560000	574450000	655800000	405490000	580310000	436680000	592110000
AT1G74910.2;AT1G74910.1;AT1G74910.3	ADP-glucose pyrophosphorylase family protein ; ADP-glucose pyrophosphorylase family protein ; ADP-glucose pyrophosphorylase family protein	58.148	6;6;5	5;5;4	131520000	134020000	107260000	114240000	134070000	116100000	137840000	112450000	219990000	140470000	184450000	128580000	106590000	154470000	131860000	134320000	140330000	119730000	98813000	140340000
AT1G74920.1;AT1G74920.2	aldehyde dehydrogenase 10A8 ; aldehyde dehydrogenase 10A8	122.75	9;8	8;7	694270000	667990000	640270000	807800000	794060000	659550000	766220000	630310000	795740000	735960000	772130000	727090000	750100000	1049100000	626620000	712550000	786370000	754990000	623700000	774460000
AT1G75270.1	dehydroascorbate reductase 2	40.855	7	7	331400000	372270000	592150000	307610000	0	270400000	829990000	391730000	526140000	382600000	468070000	406170000	454470000	964640000	500890000	560310000	530360000	433340000	324610000	292020000
AT1G75330.1	ornithine carbamoyltransferase	24.16	4	4	195370000	219730000	161960000	157220000	168780000	102270000	134670000	137350000	105710000	72056000	66921000	76597000	100500000	227050000	172390000	85739000	107320000	227920000	145520000	119490000
AT1G75340.2;AT1G75340.1	Zinc finger C-x8-C-x5-C-x3-H type family protein ; Zinc finger C-x8-C-x5-C-x3-H type family protein	6.3113	1;1	1;1	0	0	0	0	0	0	0	0	0	0	0	0	0	0	4198600	0	0	0	0	0
AT1G75500.2;AT1G75500.1	Walls Are Thin 1 ; Walls Are Thin 1	11.217	1;1	1;1	0	0	0	0	0	0	0	0	292990000	249400000	0	0	0	0	0	0	0	0	388750000	0
AT1G75560.2;AT1G75560.1	zinc knuckle (CCHC-type) family protein ; zinc knuckle (CCHC-type) family protein	48.868	1;1	1;1	34194000	41712000	31236000	54134000	0	76065000	0	0	99686000	49678000	61888000	99659000	112290000	4297000	0	17888000	0	95772000	0	0
AT1G75660.1	5-3 exoribonuclease 3	10.863	6	5	0	0	0	0	0	0	0	0	0	0	0	0	97802000	52914000	0	0	0	54320000	0	0
AT1G75680.1	glycosyl hydrolase 9B7	12.689	3	3	0	0	28268000	26224000	24217000	0	24336000	20539000	34216000	0	0	24478000	25870000	27833000	21530000	26534000	0	22695000	21249000	0
AT1G75750.2;AT1G75750.1	GAST1 protein homolog 1 ; GAST1 protein homolog 1	2.9361	1;1	1;1	0	0	0	0	0	0	0	0	0	0	0	0	0	0	0	0	0	0	0	33425000
AT1G75780.1	tubulin beta-1 chain	49.288	16	4	251360000	144970000	105310000	0	0	308780000	117670000	262310000	203400000	227430000	0	0	206630000	0	236710000	0	323710000	0	96897000	0
AT1G75950.1	S phase kinase-associated protein 1	123.27	4	3	1061300000	1159000000	1018700000	822880000	957000000	791910000	1676200000	863970000	1020700000	1070100000	1063900000	953810000	1014100000	360780000	1248100000	1027600000	679220000	1509500000	1221200000	1342800000
AT1G75990.1	PAM domain (PCI/PINT associated module) protein	12.002	13	4	128090000	111970000	138580000	128440000	167130000	0	148210000	109350000	103800000	102820000	128830000	0	116290000	148980000	109860000	130860000	0	0	0	0
AT1G76010.1	Alba DNA/RNA-binding protein	127.78	9	8	402940000	246070000	434240000	362900000	397870000	266400000	529320000	387900000	177540000	203310000	193220000	336160000	225090000	644690000	192120000	242150000	147800000	347880000	228430000	232400000
AT1G76090.1	sterol methyltransferase 3	95.589	9	9	472410000	473800000	352100000	392270000	549220000	573640000	220210000	338110000	472800000	634910000	414950000	384600000	393190000	451750000	348600000	288960000	353340000	587180000	424520000	437480000
AT1G76140.2;AT1G76140.1	Prolyl oligopeptidase family protein ; Prolyl oligopeptidase family protein	31.535	9;9	7;7	132980000	126780000	103680000	0	0	0	0	0	114640000	0	0	93326000	0	0	0	0	0	0	0	0
AT1G76150.1	enoyl-CoA hydratase 2	4.5796	1	1	0	0	0	0	0	0	0	0	0	0	0	0	0	0	0	8622100	0	0	0	0
AT1G76160.1	SKU5 similar 5	69.295	5;1;1	3;1;1	0	86356000	0	118140000	65005000	0	104920000	0	89492000	0	79291000	86271000	90968000	136850000	70200000	73013000	82456000	0	88160000	0
AT1G76180.2;AT1G76180.1	Dehydrin family protein ; Dehydrin family protein	164.03	7;7	6;6	1203900000	1224700000	1330900000	1221800000	772050000	2297800000	1450700000	1839400000	1523800000	1320600000	1722200000	1916600000	1186300000	688880000	1808000000	1353800000	1152900000	1753000000	2351800000	2434800000
AT1G76340.1	golgi nucleotide sugar transporter 3	26.986	1	1	3047800	4360900	0	0	0	0	0	24209000	7341100	0	0	0	0	0	0	0	0	0	0	0
AT1G76400.1	Ribophorin I	162.02	6	6	117650000	82967000	98655000	124960000	88489000	82872000	108290000	91571000	115320000	130720000	119500000	104380000	138710000	129550000	92167000	103020000	79119000	116270000	53832000	152360000
AT1G76490.1	hydroxy methylglutaryl CoA reductase 1	37.6	2	2	0	0	0	0	0	0	0	0	0	0	0	0	0	0	0	0	0	0	0	37384000
AT1G76550.1	Phosphofructokinase family protein	170.73	17	8	597200000	526710000	684010000	628280000	562180000	369600000	671570000	369550000	491600000	754690000	574150000	563710000	548340000	778190000	460290000	361010000	605840000	518170000	537520000	460840000
AT1G76670.1	Nucleotide-sugar transporter family protein	3.4082	1	1	0	0	0	0	0	0	0	0	0	0	0	0	0	3880800	0	0	0	0	0	0
AT1G76680.1;AT1G76680.2	12-oxophytodienoate reductase 1 ; 12-oxophytodienoate reductase 1	269.4	17;17	13;13	1870100000	1339100000	2549000000	1585500000	2250000000	1599200000	3579500000	1984800000	1458800000	1618900000	3176500000	1765200000	1814500000	1892600000	2563200000	1570300000	1811500000	1988700000	1786400000	1907600000
AT1G76690.1	12-oxophytodienoate reductase 2	5.8604	6	2	0	0	0	0	0	0	0	0	0	0	0	0	0	0	0	0	0	0	0	25928000
AT1G76790.1	O-methyltransferase family protein	22.016	3	3	0	118000000	0	0	0	0	0	0	0	0	0	0	0	0	0	0	0	0	0	0
AT1G76810.1	eukaryotic translation initiation factor 2 (eIF-2) family protein	200.67	14	11	433830000	328140000	408680000	575350000	546300000	540550000	527660000	413460000	441530000	393250000	398480000	493450000	521970000	515480000	489880000	509350000	398990000	570070000	314160000	462540000
AT1G76850.1	exocyst complex component sec5	35.001	1	1	0	0	0	0	0	0	0	0	0	0	0	0	0	0	0	0	0	0	0	7926100
AT1G77180.3;AT1G77180.2;AT1G77180.1	chromatin protein family ; chromatin protein family ; chromatin protein family	17.842	3;3;3	3;3;3	0	0	0	0	0	0	0	44586000	0	0	0	0	0	0	0	0	0	0	111700000	0
AT1G77310.1	BEST Arabidopsis thaliana protein match is: wound-responsive family protein (TAIR:AT1G21610.1); Has 493 Blast hits to 482 proteins in 163 species: Archae - 0; Bacteria - 100; Metazoa - 172; Fungi - 66; Plants - 65; Viruses - 7; Other Eukaryotes - 83 (sour	2.8208	1	1	0	0	0	0	0	0	0	0	0	0	0	0	0	0	0	0	0	0	97618000	0
AT1G77330.1	2-oxoglutarate (2OG) and Fe(II)-dependent oxygenase superfamily protein	115.32	8	8	670400000	438010000	535580000	458930000	663290000	456130000	504700000	302070000	422300000	821170000	515780000	451020000	446890000	917400000	542540000	589160000	576040000	563530000	595520000	367480000
AT1G77510.1	PDI-like 1-2	113.54	16	12	644260000	497570000	770850000	468430000	691690000	450810000	850470000	860740000	615410000	580800000	1017000000	789690000	778420000	910340000	733360000	435030000	610630000	523890000	561990000	822710000
AT1G77550.1	tubulin-tyrosine ligases;tubulin-tyrosine ligases	37.393	8	8	104200000	99047000	93611000	107530000	103840000	110950000	149030000	78316000	76231000	0	100050000	119030000	154320000	151500000	0	96516000	102270000	97976000	0	150170000
AT1G77590.1	long chain acyl-CoA synthetase 9	7.0036	4	4	0	0	0	49860000	0	0	0	0	0	0	0	0	0	0	0	0	0	0	0	0
AT1G77620.1	P-loop containing nucleoside triphosphate hydrolases superfamily protein	1.8702	1	1	0	0	0	0	0	0	0	0	0	0	0	0	0	0	0	0	0	0	0	0
AT1G77690.1;AT2G21050.1	like AUX1 3 ; like AUXIN RESISTANT 2	4.5937	1;1	1;1	0	0	0	0	0	0	0	0	0	0	0	0	0	0	0	0	3151000	0	0	0
AT1G77710.1	CONTAINS InterPro DOMAIN/s: Ubiquitin-like, Ufm1 (InterPro:IPR005375); Has 244 Blast hits to 244 proteins in 106 species: Archae - 0; Bacteria - 0; Metazoa - 149; Fungi - 0; Plants - 47; Viruses - 0; Other Eukaryotes - 48 (source: NCBI BLink).	13.33	2	2	250460000	282950000	213090000	245160000	156000000	89364000	184300000	125560000	180520000	339500000	235240000	212100000	246140000	196840000	140810000	176820000	296690000	122370000	261110000	0
AT1G77750.1	Ribosomal protein S13/S18 family	5.2591	3	3	0	0	0	0	0	0	0	0	0	0	0	0	0	0	0	0	0	0	78423000	0
AT1G77840.1	Translation initiation factor IF2/IF5	5.4201	2	1	0	0	0	0	0	0	0	0	0	0	0	0	0	0	0	0	0	6386800	0	0
AT1G77940.1	Ribosomal protein L7Ae/L30e/S12e/Gadd45 family protein	133.72	6	3	1769000000	1695600000	1809700000	2221600000	2810600000	2577600000	1584000000	1952800000	1703300000	1264000000	1510400000	1685300000	1860400000	3136200000	2703800000	2104400000	2891700000	2425700000	840040000	1551900000
AT1G78040.2;AT1G78040.1	Pollen Ole e 1 allergen and extensin family protein ; Pollen Ole e 1 allergen and extensin family protein	21.81	2;2	2;2	69174000	66146000	73975000	0	84871000	73367000	95710000	60644000	0	0	76665000	71750000	71517000	112030000	64783000	90957000	0	66995000	0	0
AT1G78060.1	Glycosyl hydrolase family protein	6.8899	2	2	0	75818000	42033000	49401000	0	0	0	0	0	0	42556000	42584000	0	0	41803000	39393000	0	0	43037000	0
AT1G78150.2;AT1G78150.1;AT1G78150.3	unknown protein; BEST Arabidopsis thaliana protein match is: unknown protein (TAIR:AT1G35780.1); Has 35333 Blast hits to 34131 proteins in 2444 species: Archae - 798; Bacteria - 22429; Metazoa - 974; Fungi - 991; Plants - 531; Viruses - 0; Other Eukaryote	2.4889	2;2;2	2;2;2	0	0	0	0	70863000	0	0	0	0	0	0	0	0	0	0	0	0	0	0	0
AT1G78190.1	Trm112p-like protein	3.0161	1	1	0	0	0	0	0	0	0	0	0	0	0	0	0	0	0	0	0	0	0	3636200
AT1G78240.2;AT1G78240.1	S-adenosyl-L-methionine-dependent methyltransferases superfamily protein ; S-adenosyl-L-methionine-dependent methyltransferases superfamily protein	3.171	4;4	4;4	0	0	0	0	0	0	0	0	0	0	0	0	0	115640000	0	0	0	0	0	0
AT1G78300.1	general regulatory factor 2	304.6	15;1	10;0	1219100000	1413000000	1361900000	1463800000	2845200000	2023700000	2387900000	1597900000	1765600000	1678800000	1997500000	1321100000	1375500000	1717900000	2483600000	2137900000	1456600000	1602500000	2572100000	1568500000
AT1G78340.1	glutathione S-transferase TAU 22	32.968	4	4	195830000	236800000	270740000	256210000	277030000	251500000	420400000	204120000	207130000	76113000	214190000	229190000	178280000	131700000	239770000	239370000	257770000	0	191620000	147560000
AT1G78380.1	glutathione S-transferase TAU 19	122.56	11;1	10;1	2884700000	3272200000	5269600000	3682200000	4065300000	3260400000	5855900000	4102000000	3571000000	2837700000	3467200000	3898600000	4008400000	4643200000	4926100000	4876500000	4363200000	3242600000	2748600000	2688900000
AT1G78570.1	rhamnose biosynthesis 1	323.31	26	16	2674600000	2740700000	2733400000	2961800000	4124100000	3950300000	5178500000	3382700000	2798400000	2842600000	3337900000	3142500000	2804600000	3757300000	4053100000	4272700000	2784900000	3666700000	3308400000	3045800000
AT1G78660.2;AT1G78660.3;AT1G78660.1	gamma-glutamyl hydrolase 1 ; gamma-glutamyl hydrolase 1 ; gamma-glutamyl hydrolase 1	25.525	2;2;2	2;2;2	41445000	45909000	39857000	37738000	41981000	36495000	34100000	31582000	44016000	64291000	33640000	33067000	37389000	47122000	28677000	31171000	35070000	39289000	34567000	24039000
AT1G78680.2;AT1G78680.1	gamma-glutamyl hydrolase 2 ; gamma-glutamyl hydrolase 2	47.05	3;3	3;3	119560000	157560000	92435000	101620000	108750000	70127000	98135000	79631000	157560000	158800000	142450000	87734000	75130000	54577000	88088000	84446000	83901000	84599000	92080000	0
AT1G78850.1	D-mannose binding lectin protein with Apple-like carbohydrate-binding domain	191.11	6;2	6;2	496760000	495470000	603790000	637310000	667570000	557940000	669730000	520210000	642630000	585870000	492800000	572830000	610440000	724160000	667350000	593290000	577380000	717060000	572860000	287010000
AT1G78900.2;AT1G78900.1	vacuolar ATP synthase subunit A ; vacuolar ATP synthase subunit A	323.31	28;28	28;28	3853500000	4877600000	5038400000	4436600000	5743900000	4452500000	6580700000	4940900000	4260000000	5763100000	4416300000	4490500000	4530800000	6748100000	4970100000	5371500000	4838300000	4916100000	4408200000	4113500000
AT1G78920.2;AT1G78920.1	vacuolar H+-pyrophosphatase 2 ; vacuolar H+-pyrophosphatase 2	4.6179	4;4;1	4;4;1	0	0	0	0	0	0	0	0	0	0	0	0	0	0	0	72380000	0	0	0	0
AT1G79010.1;AT1G16700.1	Alpha-helical ferredoxin ; Alpha-helical ferredoxin	7.3788	3;2	3;2	0	0	0	0	0	0	0	0	0	0	0	0	0	0	0	97431000	0	0	0	0
AT1G79150.1	binding	2.9496	1	1	0	0	7902100	9172800	0	0	0	5831600	8810100	8864300	0	7792900	11568000	0	6538500	7280800	0	15362000	0	0
AT1G79210.3;AT1G79210.2;AT1G79210.1	N-terminal nucleophile aminohydrolases (Ntn hydrolases) superfamily protein ; N-terminal nucleophile aminohydrolases (Ntn hydrolases) superfamily protein ; N-terminal nucleophile aminohydrolases (Ntn hydrolases) superfamily protein	-2	12;12;12	1;1;1	0	0	0	0	0	0	0	0	0	0	0	0	0	0	0	32735000	0	0	0	0
AT1G79230.3;AT1G79230.1;AT1G79230.2	mercaptopyruvate sulfurtransferase 1 ; mercaptopyruvate sulfurtransferase 1 ; mercaptopyruvate sulfurtransferase 1	99.901	5;5;4	5;5;4	106960000	169160000	138410000	133070000	187870000	250860000	66382000	225640000	229960000	125840000	267330000	141660000	149960000	0	129590000	238420000	185650000	189770000	124520000	146660000
AT1G79280.1;AT1G79280.3;AT1G79280.2	nuclear pore anchor ; nuclear pore anchor ; nuclear pore anchor	5.2887	3;3;3	3;3;3	0	0	0	0	48869000	0	0	0	0	0	0	0	0	0	0	0	0	0	0	0
AT1G79320.1	metacaspase 6	2.2583	1	1	0	0	0	0	0	0	0	0	0	0	0	0	0	0	0	0	0	0	75419000	0
AT1G79340.1	metacaspase 4	124.22	6;1	6;1	281000000	404890000	303320000	214910000	252220000	192160000	23925000	430100000	532740000	411510000	441690000	222220000	205550000	193280000	265870000	410310000	370000000	92711000	490200000	96882000
AT1G79440.1	aldehyde dehydrogenase 5F1	18.031	6	6	141110000	127640000	99516000	140380000	276430000	234680000	114950000	139150000	88615000	110620000	113400000	111150000	113440000	116280000	123000000	182570000	133660000	0	110400000	0
AT1G79500.4;AT1G79500.3;AT1G79500.2;AT1G79500.1	Aldolase-type TIM barrel family protein ; Aldolase-type TIM barrel family protein ; Aldolase-type TIM barrel family protein ; Aldolase-type TIM barrel family protein	11.266	4;4;4;4	2;2;2;2	133090000	123980000	127700000	160090000	155650000	118770000	157960000	125430000	175160000	153470000	140510000	134780000	119240000	198020000	137670000	104860000	132590000	113100000	98707000	72899000
AT1G79530.1	glyceraldehyde-3-phosphate dehydrogenase of plastid 1	323.31	11	6	1714600000	1635100000	1830000000	1471700000	1720300000	1080900000	2439700000	1356300000	1717300000	1803000000	1521600000	1404000000	1498500000	2551500000	1459000000	1516200000	2062900000	1453400000	1264400000	1772900000
AT1G79550.2;AT1G79550.1	phosphoglycerate kinase ; phosphoglycerate kinase	233.66	18;18	15;15	7756400000	6440300000	6711200000	7474300000	7327000000	5669000000	8616700000	5661600000	6571200000	6614700000	5324800000	5323600000	5814500000	9142100000	6354300000	5956400000	7503800000	6331600000	5539800000	4567800000
AT1G79590.2;AT1G79590.1	syntaxin of plants 52 ; syntaxin of plants 52	-2	1;1	1;1	0	0	0	0	0	0	0	0	0	0	0	0	0	0	0	0	0	0	0	36808000
AT1G79690.1	nudix hydrolase homolog 3	51.005	6	6	88276000	121890000	69553000	123250000	184680000	113600000	93817000	105250000	130650000	104720000	72997000	76342000	88364000	143910000	88380000	133560000	94023000	100350000	91269000	97996000
AT1G79750.1	NADP-malic enzyme 4	169.9	13;2	12;1	307610000	404520000	415850000	539600000	328350000	222640000	482750000	292110000	263090000	446120000	382460000	280430000	367170000	534850000	295980000	258240000	349210000	288490000	341230000	249370000
AT1G79870.2;AT1G79870.1	D-isomer specific 2-hydroxyacid dehydrogenase family protein ; D-isomer specific 2-hydroxyacid dehydrogenase family protein	55.21	4;4	4;4	79075000	94807000	82176000	150760000	68692000	105220000	143250000	89726000	92760000	145340000	0	110990000	98430000	71155000	117950000	101410000	118650000	111200000	0	133510000
AT1G79920.2;AT1G79920.1	Heat shock protein 70 (Hsp 70) family protein ; Heat shock protein 70 (Hsp 70) family protein	81.887	29;29	3;3	162750000	87371000	287040000	308160000	0	239130000	50692000	185460000	327500000	169130000	163020000	125610000	356990000	322640000	151200000	149920000	208600000	192780000	152040000	152060000
AT1G79930.2;AT1G79930.1	heat shock protein 91 ; heat shock protein 91	323.31	31;31	5;5	3284800000	2789100000	3478100000	3248100000	3826500000	3354300000	4435300000	3109500000	3513800000	2679300000	3373500000	3370800000	3013500000	5122900000	3236700000	3332900000	3961300000	2374400000	2633300000	3291800000
AT1G79940.4;AT1G79940.3;AT1G79940.2;AT1G79940.1	DnaJ / Sec63 Brl domains-containing protein ; DnaJ / Sec63 Brl domains-containing protein ; DnaJ / Sec63 Brl domains-containing protein ; DnaJ / Sec63 Brl domains-containing protein	76.991	8;8;8;8	8;8;8;8	173760000	96243000	132250000	149950000	134770000	163100000	110500000	133630000	147450000	77872000	103600000	162630000	180420000	222990000	0	162950000	210390000	133560000	119160000	128180000
AT1G79990.5;AT1G79990.3;AT1G79990.1	structural molecules ; structural molecules ; structural molecules	37.277	17;17;17	7;7;7	75008000	107250000	142360000	106670000	0	120040000	0	0	141320000	56855000	50093000	114560000	0	80930000	0	189530000	115960000	0	150390000	91878000
AT1G80070.1	Pre-mRNA-processing-splicing factor	150.41	14;6	14;6	237310000	220070000	250110000	335770000	247150000	192010000	253380000	173840000	224110000	277530000	243680000	243480000	281320000	286000000	211210000	215620000	179660000	287710000	170100000	298830000
AT1G80230.1	Rubredoxin-like superfamily protein	23.639	5	4	424130000	317230000	417750000	327130000	292080000	451390000	709650000	405300000	575160000	324720000	270260000	510480000	627420000	375080000	364340000	427290000	652990000	365250000	380860000	0
AT1G80240.1	Protein of unknown function, DUF642	105.55	8	8	252820000	327090000	202110000	209950000	166530000	147290000	183160000	122440000	360150000	426160000	212500000	162990000	241250000	258370000	148180000	208510000	130690000	238790000	225350000	209340000
AT1G80270.3;AT1G80270.2;AT1G80270.1	PENTATRICOPEPTIDE REPEAT 596 ; PENTATRICOPEPTIDE REPEAT 596 ; PENTATRICOPEPTIDE REPEAT 596	5.2847	3;3;3	3;3;3	0	0	0	0	0	0	0	0	0	0	0	0	0	0	0	0	122780000	0	0	0
AT1G80360.1	Pyridoxal phosphate (PLP)-dependent transferases superfamily protein	43.374	3	3	0	0	82096000	64393000	0	74636000	85878000	66591000	107610000	86241000	80815000	0	72019000	79838000	63191000	81356000	63616000	0	66490000	0
AT1G80410.1;AT1G80410.2	tetratricopeptide repeat (TPR)-containing protein ; tetratricopeptide repeat (TPR)-containing protein	202.65	13;13	13;13	383280000	410270000	535460000	553930000	526240000	679270000	460530000	514770000	515790000	481040000	481720000	453500000	488000000	521070000	532540000	351010000	471970000	542680000	396150000	611790000
AT1G80460.2;AT1G80460.1	Actin-like ATPase superfamily protein ; Actin-like ATPase superfamily protein	32.696	4;4	4;4	0	0	0	0	0	0	0	0	77063000	0	84599000	0	0	0	0	122660000	76242000	0	158410000	0
AT1G80500.1	SNARE-like superfamily protein	9.5656	3	3	0	0	0	0	0	0	0	0	0	0	0	0	0	0	0	0	0	0	0	58224000
AT1G80560.1	isopropylmalate dehydrogenase 2	26.063	4	3	0	0	0	0	0	0	0	0	0	0	0	0	0	167560000	0	0	103860000	0	0	0
AT1G80600.1	HOPW1-1-interacting 1	64.967	8	8	328100000	163570000	261920000	367610000	175600000	106480000	354850000	128710000	198560000	244250000	223920000	180410000	215200000	381940000	160010000	189300000	287110000	230320000	199900000	157820000
AT1G80670.1	Transducin/WD40 repeat-like superfamily protein	5.8412	1	1	0	0	0	0	0	0	0	0	0	0	0	0	0	0	0	0	0	0	0	24561000
AT1G80750.1	Ribosomal protein L30/L7 family protein	23.904	4	4	0	0	100900000	245990000	0	148800000	91231000	0	0	0	0	98963000	0	110240000	85772000	113430000	0	79746000	0	68188000
AT2G01140.1	Aldolase superfamily protein	323.31	11;1;1	10;0;0	2584600000	2575300000	2829600000	2345800000	3244900000	2847700000	4121500000	2657300000	2854600000	2919000000	2996700000	2507300000	2570800000	3876900000	2774100000	3218300000	2908600000	2515700000	2399000000	2683600000
AT2G01190.1	Octicosapeptide/Phox/Bem1p family protein	4.665	1	1	0	0	0	0	0	0	0	0	0	0	0	0	0	0	0	0	0	0	0	11012000
AT2G01250.1	Ribosomal protein L30/L7 family protein	110.01	9;3	7;3	2676600000	2443900000	2707200000	3768800000	4267700000	3146000000	3440800000	2591300000	2474300000	1696800000	2451000000	2936900000	3603600000	4818400000	2940400000	3040600000	2721900000	2760200000	1315800000	2737300000
AT2G01470.1	SEC12P-like 2 protein	19.484	3	3	113940000	0	0	0	0	72782000	120510000	210970000	151730000	0	142150000	122790000	125920000	224600000	138480000	85814000	0	0	0	148450000
AT2G01490.1	phytanoyl-CoA dioxygenase (PhyH) family protein	15.207	1	1	0	0	0	0	0	0	0	0	0	0	0	0	0	0	0	0	0	0	0	24291000
AT2G01530.1;AT4G23680.1;AT4G23670.1;AT4G14060.1;AT2G01520.1;AT3G26460.1;AT1G14950.1	MLP-like protein 329 ; Polyketide cyclase/dehydrase and lipid transport superfamily protein ; Polyketide cyclase/dehydrase and lipid transport superfamily protein ; Polyketide cyclase/dehydrase and lipid transport superfamily protein ; MLP-like protein 32	3.8521	2;1;1;1;1;1;1	2;1;1;1;1;1;1	53070000	161850000	58386000	0	0	0	92258000	0	0	0	0	0	0	0	0	0	0	0	0	0
AT2G01540.1	Calcium-dependent lipid-binding (CaLB domain) family protein	2.4623	1	1	0	0	0	0	0	0	0	0	0	0	0	0	0	0	0	0	0	0	0	42265000
AT2G01690.1;AT2G01690.2	ARM repeat superfamily protein ; ARM repeat superfamily protein	21.729	3;2	3;2	28207000	28712000	0	23391000	0	27041000	29633000	0	0	0	25243000	0	30390000	40252000	21928000	31013000	0	0	0	0
AT2G01720.1	Ribophorin I	86.565	8	8	389580000	308040000	302350000	361700000	446130000	279810000	444370000	331190000	172860000	227730000	237350000	313220000	328520000	374990000	333150000	346530000	362930000	358990000	271540000	329410000
AT2G01970.1	Endomembrane protein 70 protein family	1.8438	7	1	0	0	0	0	0	0	0	0	0	0	0	0	0	0	0	0	0	0	0	57978000
AT2G02050.1	NADH-ubiquinone oxidoreductase B18 subunit, putative	10.669	3	3	69564000	77267000	89025000	98988000	110680000	152340000	35481000	263750000	253730000	97304000	241700000	142110000	88623000	16263000	169630000	0	0	118840000	0	0
AT2G02130.1	low-molecular-weight cysteine-rich 68	49.489	1	1	0	0	0	0	0	0	0	0	0	0	0	0	0	0	0	0	0	0	0	62593000
AT2G02390.1;AT2G02390.3;AT2G02390.2	glutathione S-transferase zeta 1 ; glutathione S-transferase zeta 1 ; glutathione S-transferase zeta 1	34.47	4;4;3;1	4;4;3;1	0	0	0	62389000	0	55785000	158140000	74951000	62909000	0	0	105540000	76022000	0	147120000	73471000	0	0	0	76667000
AT2G02560.2;AT2G02560.1	cullin-associated and neddylation dissociated ; cullin-associated and neddylation dissociated	279.59	14;14	14;14	270610000	249970000	297270000	294100000	286340000	220420000	243820000	181830000	304570000	335010000	287710000	253990000	269500000	331070000	239470000	208330000	222110000	319310000	166010000	296180000
AT2G02750.1	Pentatricopeptide repeat (PPR) superfamily protein	2.4193	1	1	0	0	0	0	0	0	0	0	0	0	0	0	0	0	0	0	0	0	0	79827000
AT2G03120.1	signal peptide peptidase	21.54	3	3	112170000	108310000	146390000	215310000	141650000	136230000	129620000	110760000	131280000	108490000	123710000	122230000	115450000	144040000	94165000	73485000	0	135070000	55181000	220890000
AT2G03220.1	fucosyltransferase 1	5.0526	1	1	0	0	0	0	0	0	0	0	0	0	0	0	0	0	0	0	0	0	0	13762000
AT2G03240.1;AT1G26730.1;AT1G35350.1;AT2G03250.1;AT3G29060.1;AT1G14040.1	EXS (ERD1/XPR1/SYG1) family protein ; EXS (ERD1/XPR1/SYG1) family protein ; EXS (ERD1/XPR1/SYG1) family protein ; EXS (ERD1/XPR1/SYG1) family protein ; EXS (ERD1/XPR1/SYG1) family protein ; EXS (ERD1/XPR1/SYG1) family protein	1.5864	2;1;1;1;1;1	2;1;1;1;1;1	0	0	0	0	0	0	0	0	0	0	0	0	0	0	0	0	0	0	1052800000	0
AT2G03440.1	nodulin-related protein 1	18.086	1	1	11971000	17136000	11137000	7073200	0	22661000	0	16312000	21861000	12545000	9866000	17928000	11864000	2114900	3130400	0	0	10963000	0	0
AT2G03640.1;AT2G03640.2;AT2G03640.4;AT2G03640.3	Nuclear transport factor 2 (NTF2) family protein with RNA binding (RRM-RBD-RNP motifs) domain ; Nuclear transport factor 2 (NTF2) family protein with RNA binding (RRM-RBD-RNP motifs) domain ; Nuclear transport factor 2 (NTF2) family protein with RNA bindi	5.4544	2;2;2;2	2;2;2;2	110730000	121670000	81142000	81200000	93733000	138550000	56631000	0	126040000	116510000	119230000	128100000	113430000	33644000	0	103810000	111160000	0	124870000	0
AT2G03680.2;AT2G03680.1	spiral1 ; spiral1	24.664	2;2	2;2	146350000	320470000	139270000	216220000	424090000	368460000	91364000	170450000	318740000	123200000	118440000	297400000	214400000	239950000	267330000	226940000	0	162250000	0	170670000
AT2G03760.1	sulphotransferase 12	10.17	3	3	40640000	46030000	0	0	0	43143000	109540000	59204000	57174000	61611000	87601000	55118000	0	74777000	70317000	81926000	61960000	66806000	57024000	58134000
AT2G03820.1	nonsense-mediated mRNA decay NMD3 family protein	28.545	5	5	0	38486000	0	68304000	63445000	71005000	0	0	0	0	0	0	0	0	0	0	0	0	0	0
AT2G03870.2;AT2G03870.1	Small nuclear ribonucleoprotein family protein ; Small nuclear ribonucleoprotein family protein	44.868	2;2	2;2	44328000	40087000	37586000	48101000	50092000	26932000	41290000	28145000	56818000	69406000	34833000	44959000	49156000	54338000	30871000	41783000	0	68525000	25696000	43310000
AT2G04030.2;AT2G04030.1	Chaperone protein htpG family protein ; Chaperone protein htpG family protein	323.31	26;26	20;20	1575600000	1280700000	1408100000	1506400000	1793500000	1822600000	2009900000	1609400000	1297800000	1144700000	1237700000	1475300000	1513600000	1949900000	1332000000	1671400000	1737600000	1446100000	1424300000	1557700000
AT2G04160.1	Subtilisin-like serine endopeptidase family protein	47.073	5	5	80371000	88584000	50269000	0	73948000	114810000	68090000	95140000	165250000	0	0	73833000	0	130960000	67374000	62666000	100080000	74571000	109660000	55814000
AT2G04280.1	unknown protein; FUNCTIONS IN: molecular_function unknown; INVOLVED IN: biological_process unknown; EXPRESSED IN: 24 plant structures; EXPRESSED DURING: 13 growth stages; BEST Arabidopsis thaliana protein match is: unknown protein (TAIR:AT4G12700.1); Has	2.4115	2	2	0	0	0	0	0	0	0	0	0	0	0	0	37407000	0	0	0	0	0	0	0
AT3G10610.1;AT2G05220.2;AT2G05220.1;AT5G04800.4;AT5G04800.3;AT5G04800.2;AT5G04800.1;AT2G04390.1	Ribosomal S17 family protein ; Ribosomal S17 family protein ; Ribosomal S17 family protein ; Ribosomal S17 family protein ; Ribosomal S17 family protein ; Ribosomal S17 family protein ; Ribosomal S17 family protein ; Ribosomal S17 family protein	21.183	6;6;6;6;6;6;6;6	6;6;6;6;6;6;6;6	1001600000	791990000	907510000	1225500000	2833900000	2721000000	1500400000	1986200000	2061600000	785510000	938010000	1219000000	1554200000	783510000	1862000000	3494400000	1508700000	1539700000	1162900000	1446100000
AT2G04400.1	Aldolase-type TIM barrel family protein	10.315	2	2	0	0	0	0	0	0	0	0	0	0	0	0	0	0	0	0	0	0	0	11277000
AT5G35680.2;AT5G35680.1;AT2G04520.1;AT5G35680.3	Nucleic acid-binding, OB-fold-like protein ; Nucleic acid-binding, OB-fold-like protein ; Nucleic acid-binding, OB-fold-like protein ; Nucleic acid-binding, OB-fold-like protein	16.796	2;2;2;2	2;2;2;2	0	0	410920000	0	0	516030000	0	0	0	0	0	375900000	0	0	0	525940000	112640000	509070000	0	0
AT2G04650.1	ADP-glucose pyrophosphorylase family protein	2.585	2	1	0	0	0	0	4402900	0	0	0	0	0	0	0	0	0	0	0	0	0	0	0
AT2G04780.2;AT2G04780.1	FASCICLIN-like arabinoogalactan 7 ; FASCICLIN-like arabinoogalactan 7	114.08	4;4	4;4	322720000	297410000	347870000	0	231040000	0	365890000	369210000	610560000	345470000	389770000	327390000	0	597650000	390150000	0	417760000	0	0	404450000
AT2G05120.2;AT2G05120.1	Nucleoporin, Nup133/Nup155-like ; Nucleoporin, Nup133/Nup155-like	3.3528	1;1	1;1	0	0	0	0	0	0	0	0	0	0	0	0	4735100	0	0	0	0	0	0	0
AT2G05710.1	aconitase 3	323.31	26	20	2214700000	2496700000	2566700000	2198300000	2869900000	2168200000	3815900000	2332400000	2520600000	2221100000	2971900000	2336900000	2044400000	3761100000	2706500000	2241000000	2364400000	2235800000	2352900000	1911300000
AT2G05830.3;AT2G05830.2;AT2G05830.4;AT2G05830.1	NagB/RpiA/CoA transferase-like superfamily protein ; NagB/RpiA/CoA transferase-like superfamily protein ; NagB/RpiA/CoA transferase-like superfamily protein ; NagB/RpiA/CoA transferase-like superfamily protein	10.34	1;1;1;1	1;1;1;1	0	0	0	0	0	0	7057900	0	10736000	0	0	9274600	16215000	7613600	0	12075000	0	25735000	0	15094000
AT2G05840.1;AT2G05840.2	20S proteasome subunit PAA2 ; 20S proteasome subunit PAA2	160.26	8;7	5;4	155100000	119300000	158290000	145500000	181370000	101120000	197570000	108470000	243760000	271160000	210100000	153980000	202220000	203280000	159740000	136630000	126700000	199070000	92892000	158710000
AT2G05920.1	Subtilase family protein	150.58	10	10	338230000	538650000	421920000	537650000	402350000	677810000	90418000	935390000	609590000	581170000	973620000	558910000	580960000	197230000	228470000	363330000	233570000	855450000	627350000	473550000
AT2G05990.2;AT2G05990.1	NAD(P)-binding Rossmann-fold superfamily protein ; NAD(P)-binding Rossmann-fold superfamily protein	323.31	10;10	10;10	686650000	674110000	631920000	609620000	616120000	409130000	708820000	442260000	567860000	861940000	522570000	546600000	615100000	780940000	523120000	468350000	347680000	614040000	561190000	710850000
AT2G06850.1	xyloglucan endotransglucosylase/hydrolase 4	22.044	4	4	138100000	196420000	164120000	0	0	0	170960000	0	222930000	222470000	0	131240000	0	191690000	0	184640000	286040000	0	0	0
AT2G06990.1	RNA helicase, ATP-dependent, SK12/DOB1 protein	4.9907	2	2	0	0	0	0	0	0	0	0	0	0	0	0	0	0	0	0	0	25724000	0	0
AT2G07050.1	cycloartenol synthase 1	2.0466	1	1	0	0	0	0	0	0	0	0	0	0	0	0	0	0	0	0	0	15042000	0	0
AT2G07340.2;AT2G07340.1	PREFOLDIN 1 ; PREFOLDIN 1	4.2821	3;3	3;3	125420000	0	0	0	0	0	0	0	60322000	0	0	0	0	0	0	0	0	0	0	69282000
AT2G07360.1;AT2G07360.2	SH3 domain-containing protein ; SH3 domain-containing protein	31.957	4;4	4;4	83057000	66880000	52286000	112040000	75338000	45722000	0	0	0	0	0	0	0	31292000	0	89107000	0	114970000	0	0
ATMG01270.1;AT2G07696.1	mitochondrial ribosomal protein S7 ; Ribosomal protein S7p/S5e family protein	6.449	2;2	2;2	180070000	166550000	152990000	0	0	104540000	21623000	164250000	227780000	151740000	195200000	133350000	0	81321000	0	0	0	0	0	0
ATMG01190.1;AT2G07698.1	ATP synthase subunit 1 ; ATPase, F1 complex, alpha subunit protein	323.31	14;14	14;14	6106800000	5859700000	6570400000	5651000000	6551800000	6190200000	5149100000	5443600000	6456500000	5169100000	5698500000	5629000000	6612800000	7104100000	5196700000	6717800000	6691500000	5911400000	4044500000	6067800000
ATMG00480.1;AT2G07707.1	Plant mitochondrial ATPase, F0 complex, subunit 8 protein ; Plant mitochondrial ATPase, F0 complex, subunit 8 protein	13.861	2;2	2;2	0	0	0	0	238720000	0	0	160990000	190630000	198190000	161770000	0	435720000	435440000	196080000	0	197850000	0	167230000	0
ATMG00560.1;AT2G07715.1	Nucleic acid-binding, OB-fold-like protein ; Nucleic acid-binding, OB-fold-like protein	20.558	1;1	1;1	0	0	0	0	0	0	0	0	0	0	0	0	0	0	0	0	0	0	0	23553000
ATMG00220.1;AT2G07727.1	apocytochrome b ; Di-haem cytochrome, transmembrane;Cytochrome b/b6, C-terminal	16.308	1;1	1;1	0	0	0	0	0	0	0	0	0	0	0	0	0	0	0	0	0	0	0	105920000
ATMG01170.1;ATMG00410.1;AT2G07741.1	ATPase, F0 complex, subunit A protein ; ATPase subunit 6-1 ; ATPase, F0 complex, subunit A protein	7.1171	2;2;2	2;2;2	0	0	0	0	0	0	0	0	0	0	0	0	0	0	0	0	0	106970000	0	0
AT2G07785.1;ATMG01275.1;ATMG01120.1;ATMG00516.1	NADH dehydrogenase family protein ; NADH dehydrogenase 1A ; NADH dehydrogenase 1B ; NADH dehydrogenase 1C	4.8052	1;1;1;1	1;1;1;1	0	0	0	0	0	0	0	0	0	0	0	0	0	0	0	0	0	0	47055000	0
AT2G09990.1;AT5G18380.3;AT5G18380.2;AT5G18380.1	Ribosomal protein S5 domain 2-like superfamily protein ; Ribosomal protein S5 domain 2-like superfamily protein ; Ribosomal protein S5 domain 2-like superfamily protein ; Ribosomal protein S5 domain 2-like superfamily protein	79.682	6;5;5;5;1	6;5;5;5;1	2262300000	1010400000	2904700000	2283300000	738260000	2517300000	1453100000	1753300000	1045900000	964730000	1613500000	2803400000	1518400000	923690000	700580000	2095300000	1490500000	1517200000	677610000	2363200000
AT2G13540.1	ARM repeat superfamily protein	224.25	7	7	196980000	174190000	193880000	204750000	151790000	125280000	169640000	120890000	160940000	216180000	144510000	157210000	194610000	206070000	142330000	145170000	139260000	170380000	126960000	199870000
AT2G13560.1	NAD-dependent malic enzyme 1	34.952	4	4	0	43859000	40770000	52512000	47011000	44156000	53889000	0	62028000	48069000	43975000	33842000	38858000	54439000	0	32191000	49074000	93015000	39904000	48429000
AT2G14120.2;AT2G14120.1;AT2G14120.3	dynamin related protein ; dynamin related protein ; dynamin related protein	28.751	6;6;6	2;2;2	109390000	131840000	140700000	182730000	155620000	125530000	138970000	151340000	193360000	174830000	241370000	163260000	131660000	214610000	173430000	83656000	180660000	130720000	95826000	190870000
AT2G14170.2;AT2G14170.3;AT2G14170.1	aldehyde dehydrogenase 6B2 ; aldehyde dehydrogenase 6B2 ; aldehyde dehydrogenase 6B2	71.063	4;4;4	4;4;4	168060000	192700000	177470000	0	76249000	108760000	140240000	99826000	140450000	129830000	150490000	152200000	147190000	122220000	126050000	131100000	77696000	105050000	0	64210000
AT2G14720.2;AT2G14720.1;AT2G14740.2;AT2G14740.1	vacuolar sorting receptor 4 ; vacuolar sorting receptor 4 ; vaculolar sorting receptor 3 ; vaculolar sorting receptor 3	24.532	4;4;3;3;1	4;4;3;3;1	75006000	224550000	55845000	0	140350000	77383000	121310000	139280000	545720000	138870000	134400000	83668000	71698000	35801000	50679000	43701000	92521000	99213000	76811000	84606000
AT2G14750.1	APS kinase	1.6135	1	1	0	0	0	0	0	0	0	0	0	0	0	0	0	0	0	0	0	0	0	8064500
AT2G14835.2;AT2G14835.1	RING/U-box superfamily protein ; RING/U-box superfamily protein	8.8684	1;1	1;1	0	0	0	0	0	0	0	0	0	0	0	0	0	0	0	0	0	0	0	15646000
AT2G14850.1	unknown protein; BEST Arabidopsis thaliana protein match is: unknown protein (TAIR:AT4G33890.2); Has 140 Blast hits to 132 proteins in 17 species: Archae - 0; Bacteria - 0; Metazoa - 1; Fungi - 2; Plants - 133; Viruses - 0; Other Eukaryotes - 4 (source: N	-2	1	1	0	0	0	0	0	0	0	0	0	0	0	0	0	0	0	0	0	0	0	162100000
AT2G15240.1	UNC-50 family protein	4.8906	1	1	0	0	0	0	0	0	0	0	0	0	0	0	0	0	0	0	0	0	0	14331000
AT2G15390.1;AT2G15390.2	fucosyltransferase 4 ; fucosyltransferase 4	2.6103	1;1	1;1	0	0	0	0	0	0	0	0	0	6130900	0	0	0	0	0	0	0	0	0	0
AT2G15430.1	DNA-directed RNA polymerase family protein	13.101	1	1	0	0	0	0	0	0	0	0	0	0	0	0	0	0	0	0	3707700	0	0	0
AT2G15480.1;AT2G15480.2	UDP-glucosyl transferase 73B5 ; UDP-glucosyl transferase 73B5	6.2084	6;6	1;1	0	0	0	0	0	0	0	0	0	0	0	0	0	0	0	0	0	7444900	0	0
AT2G15490.1;AT2G15490.3;AT2G15490.2	UDP-glycosyltransferase 73B4 ; UDP-glycosyltransferase 73B4 ; UDP-glycosyltransferase 73B4	121.41	9;8;5	4;3;1	328460000	285290000	237600000	373400000	235260000	400310000	215720000	345270000	130070000	203280000	274190000	310430000	217450000	297240000	333150000	230730000	335710000	548280000	245020000	190960000
AT2G15620.1	nitrite reductase 1	137.22	12	12	579710000	613910000	639980000	573540000	782770000	691780000	891390000	729780000	610490000	542340000	786020000	645100000	559840000	342070000	895760000	840170000	609630000	492210000	672800000	497540000
AT2G15860.1;AT2G15860.2	unknown protein; FUNCTIONS IN: molecular_function unknown; INVOLVED IN: biological_process unknown; LOCATED IN: cellular_component unknown; EXPRESSED IN: 24 plant structures; EXPRESSED DURING: 13 growth stages; Has 30201 Blast hits to 17322 proteins in 78	76.13	6;5	6;5	89565000	86050000	74898000	83514000	63993000	104210000	21756000	68536000	74084000	87118000	108180000	96406000	97286000	63004000	86733000	77653000	73350000	88510000	272000000	87782000
AT2G16370.1;AT4G34570.1	thymidylate synthase 1 ; thymidylate synthase 2	4.7334	1;1	1;1	0	0	0	0	0	0	0	0	0	0	0	0	0	0	0	0	0	0	0	9872500
AT2G16460.2;AT2G16460.1	Protein of unknown function (DUF1640) ; Protein of unknown function (DUF1640)	15.126	1;1	1;1	0	0	0	0	0	0	0	0	0	0	0	0	0	0	4707900	0	0	0	0	0
AT2G16570.1;AT4G34740.1	GLN phosphoribosyl pyrophosphate amidotransferase 1 ; GLN phosphoribosyl pyrophosphate amidotransferase 2	24.624	3;2;1	3;2;1	69076000	79283000	72961000	136380000	116380000	152890000	0	0	0	46057000	43933000	60686000	66571000	78733000	55342000	59280000	37095000	105020000	72243000	63982000
AT2G16600.1;AT2G16600.2	rotamase CYP 3 ; rotamase CYP 3	299.45	9;8	7;6	2242300000	2303400000	794720000	1444200000	1711000000	1372600000	1460000000	1283000000	1890500000	2391700000	1185600000	1407100000	1449400000	2049800000	1955000000	1631600000	2443500000	721650000	1729100000	1106400000
AT2G16640.1	multimeric translocon complex in the outer envelope membrane 132	2.144	2	2	0	0	0	0	0	0	0	0	0	0	0	0	12058000	0	0	0	0	0	0	0
AT2G16700.2;AT2G16700.1	actin depolymerizing factor 5 ; actin depolymerizing factor 5	2.6876	1;1	1;1	0	0	0	0	0	0	0	0	0	0	0	0	0	0	0	0	0	26919000	0	0
AT2G16780.1	Transducin family protein / WD-40 repeat family protein	1.6268	1	1	0	0	0	0	0	0	0	0	0	0	0	0	0	0	0	0	0	0	38097000	0
AT2G16940.1;AT2G16940.3;AT2G16940.2	Splicing factor, CC1-like ; Splicing factor, CC1-like ; Splicing factor, CC1-like	3.4695	2;2;2	2;2;2	0	0	0	0	0	0	0	0	0	0	0	0	0	0	0	0	0	0	0	64864000
AT2G16950.2;AT2G16950.1	transportin 1 ; transportin 1	197.44	18;17	18;17	483760000	389090000	401300000	456640000	359320000	360310000	495590000	331540000	469720000	528460000	428810000	373280000	468420000	598740000	326650000	397780000	416710000	498850000	373280000	436060000
AT2G16960.2;AT2G16960.1	ARM repeat superfamily protein ; ARM repeat superfamily protein	-2	1;1	1;1	0	0	0	0	0	0	0	0	0	0	0	0	0	0	0	0	0	111370000	0	0
AT2G17130.2;AT2G17130.1	isocitrate dehydrogenase subunit 2 ; isocitrate dehydrogenase subunit 2	81.558	7;7;1	3;3;0	105580000	134710000	104560000	90276000	91427000	43917000	106210000	61815000	94595000	138920000	98020000	63834000	88254000	0	74728000	83692000	62732000	82091000	95000000	100260000
AT2G17190.1	ubiquitin family protein	38.546	2	1	0	0	0	0	0	0	0	0	0	0	0	0	0	0	0	0	0	0	0	41295000
AT2G17200.1	ubiquitin family protein	40.154	2	1	0	0	0	0	0	0	0	0	0	0	0	0	0	0	0	0	0	0	0	68303000
AT2G17265.1	homoserine kinase	162.7	6	6	143620000	122880000	167560000	88974000	135810000	109480000	175810000	131790000	177020000	183250000	206920000	178800000	172280000	205090000	166070000	101150000	129100000	112290000	134200000	215190000
AT2G17280.2;AT2G17280.1	Phosphoglycerate mutase family protein ; Phosphoglycerate mutase family protein	15.132	3;3	3;3	0	0	0	0	0	0	0	117020000	0	97512000	113640000	0	0	0	104920000	149470000	155780000	0	0	119700000
AT2G17290.1	Calcium-dependent protein kinase family protein	2.4761	3	1	0	0	0	0	0	0	0	0	0	0	0	0	0	0	0	0	0	0	0	10347000
AT2G17340.1	Uncharacterised conserved protein (UCP030210)	23.674	3;1	3;1	43088000	0	0	0	0	20880000	36263000	0	0	0	0	0	44439000	88387000	35300000	39531000	0	24379000	0	0
AT5G07090.2;AT2G17360.1;AT5G07090.1;AT5G58420.1;AT2G17360.2	Ribosomal protein S4 (RPS4A) family protein ; Ribosomal protein S4 (RPS4A) family protein ; Ribosomal protein S4 (RPS4A) family protein ; Ribosomal protein S4 (RPS4A) family protein ; Ribosomal protein S4 (RPS4A) family protein	154.29	10;10;10;9;6	10;10;10;9;6	2935800000	2620000000	2334700000	2804300000	5400400000	4753700000	3645200000	3385400000	1800900000	2219000000	1495000000	3656200000	2523800000	5216000000	3686400000	3206100000	3630400000	4057800000	2182300000	4205200000
AT2G17380.1;AT4G35410.2	associated protein 19 ; Clathrin adaptor complex small chain family protein	6.6004	1;1	1;1	0	0	0	0	0	0	0	0	0	0	0	0	0	0	0	0	0	0	0	63425000
AT2G17390.1	ankyrin repeat-containing 2B	6.5904	4	3	124980000	119490000	0	0	0	176040000	328260000	165700000	0	123600000	0	136270000	128790000	72665000	0	0	151990000	168770000	0	0
AT2G17420.1	NADPH-dependent thioredoxin reductase A	204.2	8;3	8;3	1561500000	1671800000	1247700000	1477900000	2557500000	1832100000	1658600000	1455900000	1338700000	1189700000	1106600000	1572200000	1555900000	2365900000	1778200000	2424200000	2054000000	1519400000	1389000000	1491800000
AT2G17560.3;AT2G17560.2;AT2G17560.1	high mobility group B4 ; high mobility group B4 ; high mobility group B4	1.6519	1;1;1	1;1;1	0	0	0	0	0	0	0	0	0	0	0	0	0	0	0	0	0	0	25288000	0
AT2G17630.1	Pyridoxal phosphate (PLP)-dependent transferases superfamily protein	62.543	7	3	217860000	185180000	188570000	249520000	223140000	298110000	293170000	0	122930000	145940000	196150000	286650000	182380000	0	336090000	268510000	266520000	190200000	136180000	196140000
AT2G17720.1	2-oxoglutarate (2OG) and Fe(II)-dependent oxygenase superfamily protein	41.023	5	5	87179000	124640000	0	97878000	0	117390000	129720000	116090000	117140000	177080000	117640000	103350000	102090000	153100000	115040000	123220000	0	115840000	124100000	0
AT2G17790.1	VPS35 homolog A	16.567	2	2	62577000	60965000	58701000	60222000	49865000	23638000	0	30942000	62743000	0	61427000	41542000	0	0	36809000	61944000	0	0	0	0
AT2G17840.1	Senescence/dehydration-associated protein-related	27.099	1	1	0	0	0	0	0	0	0	0	0	0	0	0	0	0	0	0	0	0	0	43767000
AT2G17870.1	cold shock domain protein 3	18.028	3	3	0	0	0	0	0	0	0	0	0	0	0	0	0	0	0	0	0	0	0	192040000
AT2G17980.1	Sec1/munc18-like (SM) proteins superfamily	9.3534	3	3	76631000	79727000	75067000	0	104010000	81152000	81089000	0	0	0	0	68937000	85031000	0	0	126880000	0	0	0	0
AT2G18020.1	Ribosomal protein L2 family	284.19	9;2	3;0	4969200000	3903300000	4506900000	5236900000	8892200000	11573000000	8158100000	8941300000	3795100000	4593000000	5141500000	5775500000	5648100000	6051100000	5350000000	6612000000	7220200000	7381000000	4930000000	6514500000
AT2G18030.1;AT2G18030.2	Peptide methionine sulfoxide reductase family protein ; Peptide methionine sulfoxide reductase family protein	2.4437	2;1	2;1	0	0	0	0	0	0	0	0	0	0	0	0	0	0	0	0	0	0	0	87034000
AT2G18040.1	peptidylprolyl cis/trans isomerase, NIMA-interacting 1	43.016	7	7	751760000	1307000000	718500000	552380000	267220000	695110000	139320000	590270000	2075100000	1165100000	1188300000	878080000	940430000	257580000	539860000	650280000	810250000	809760000	1402600000	816880000
AT2G18110.1	Translation elongation factor EF1B/ribosomal protein S6 family protein	29.843	5	2	101490000	94047000	82351000	150330000	124040000	43644000	69496000	0	52004000	53078000	48371000	62946000	48610000	156220000	65737000	120680000	65525000	68297000	50038000	0
AT2G18230.1	pyrophosphorylase 2	8.0017	2	1	0	0	0	0	0	0	0	0	0	0	0	0	0	0	0	0	0	0	0	73415000
AT2G18390.1	ADP-ribosylation factor family protein	1.5791	1	1	0	0	0	0	0	0	0	0	0	0	0	0	0	0	0	0	0	0	0	10454000
AT2G18510.1	RNA-binding (RRM/RBD/RNP motifs) family protein	4.7144	1	1	0	0	0	0	0	0	0	0	0	0	0	0	0	0	0	0	0	0	29088000	0
AT2G18790.1	phytochrome B	5.9123	1	1	0	0	0	0	0	0	0	0	0	0	0	0	0	0	0	0	0	0	0	8377100
AT2G18900.1	Transducin/WD40 repeat-like superfamily protein	10.573	2	2	46425000	0	47790000	59290000	0	45815000	50723000	39696000	0	0	0	44715000	39512000	49099000	40167000	32952000	38166000	0	0	43720000
AT2G18960.1	H(+)-ATPase 1	27.447	19;4;3;3	3;0;0;0	140610000	91457000	125140000	143410000	94930000	72980000	145610000	90339000	90712000	116660000	129850000	130860000	173370000	144430000	76815000	38719000	86175000	114360000	80591000	105160000
AT2G18980.1	Peroxidase superfamily protein	40.96	12	8	331080000	389500000	186890000	492550000	605050000	280420000	601520000	517110000	425120000	470780000	239750000	341180000	314040000	640630000	427170000	608190000	653290000	391780000	434060000	340560000
AT2G19080.1	metaxin-related	39.257	2	2	0	0	0	0	0	0	0	58325000	0	0	65072000	59984000	61487000	0	61094000	0	0	0	0	0
AT2G19160.1;AT5G57270.3;AT5G57270.2;AT5G57270.1;AT4G30060.1	Core-2/I-branching beta-1,6-N-acetylglucosaminyltransferase family protein ; Core-2/I-branching beta-1,6-N-acetylglucosaminyltransferase family protein ; Core-2/I-branching beta-1,6-N-acetylglucosaminyltransferase family protein ; Core-2/I-branching beta-	2.3395	2;1;1;1;1	2;1;1;1;1	0	0	0	0	0	0	0	0	0	0	0	0	0	0	0	7963200	0	0	0	0
AT2G19170.1;AT4G30020.1	subtilisin-like serine protease 3 ; PA-domain containing subtilase family protein	1.9668	1;1	1;1	0	0	0	0	0	0	0	0	0	0	0	0	0	0	0	0	0	0	11111000	0
AT2G19480.3;AT2G19480.2;AT2G19480.1	nucleosome assembly protein 1;2 ; nucleosome assembly protein 1;2 ; nucleosome assembly protein 1;2	130.15	8;8;8	7;7;7	814970000	544420000	841370000	900650000	1048600000	955740000	905410000	860390000	634100000	688770000	736240000	868450000	754870000	957910000	837410000	761190000	924090000	824760000	460000000	571850000
AT2G19490.1	recA DNA recombination family protein	18.948	1	1	0	0	0	0	0	0	0	0	0	0	0	0	0	0	0	0	0	0	0	13599000
AT2G19520.1	Transducin family protein / WD-40 repeat family protein	7.5305	3;1	3;1	0	0	0	121820000	0	0	0	0	0	0	0	0	0	0	0	0	0	0	0	0
AT2G19570.1	cytidine deaminase 1	25.373	3	3	55149000	100070000	68315000	97873000	70776000	58097000	88512000	61138000	0	83923000	88112000	71149000	72915000	80247000	69481000	65961000	0	75311000	0	0
AT2G19670.1	protein arginine methyltransferase 1A	20.151	2	1	0	0	0	0	0	0	0	0	0	0	0	0	0	0	0	0	0	0	0	49579000
AT2G19730.3;AT2G19730.2;AT2G19730.1	Ribosomal L28e protein family ; Ribosomal L28e protein family ; Ribosomal L28e protein family	212.17	7;7;7	6;6;6	2302800000	1613500000	1962300000	2094300000	2329600000	3119400000	2366500000	2421200000	1688400000	1532100000	2028400000	2325000000	2013900000	1009600000	2243800000	2266600000	1375000000	2710300000	1501700000	2208900000
AT5G56710.1;AT4G26230.1;AT2G19740.1	Ribosomal protein L31e family protein ; Ribosomal protein L31e family protein ; Ribosomal protein L31e family protein	163.05	3;3;3;1	3;3;3;1	1528000000	981040000	1299700000	1205800000	1480400000	954370000	1105800000	794420000	1090800000	1702800000	1250200000	1003000000	1647800000	1686000000	1103300000	577700000	1032700000	1476700000	1440400000	1159100000
AT5G56670.1;AT4G29390.1;AT2G19750.1	Ribosomal protein S30 family protein ; Ribosomal protein S30 family protein ; Ribosomal protein S30 family protein	2.1589	1;1;1	1;1;1	0	0	0	0	0	0	0	0	0	0	0	0	0	0	0	166050000	0	0	0	0
AT2G19760.1	profilin 1	163.31	7	7	619980000	1100700000	864190000	622760000	974250000	615370000	1338400000	769100000	892690000	1195900000	1157600000	660300000	558070000	1077200000	1092600000	882580000	1128600000	540680000	1232800000	475430000
AT2G19790.1	SNARE-like superfamily protein	5.4584	1	1	0	0	0	0	0	0	0	0	0	0	0	0	0	0	0	0	0	0	0	0
AT4G29160.2;AT2G19830.1;AT4G29160.3;AT4G29160.1	SNF7 family protein ; SNF7 family protein ; SNF7 family protein ; SNF7 family protein	3.1701	2;2;2;2	2;2;2;2	0	0	0	0	0	0	0	0	0	0	0	0	0	0	0	0	0	0	226930000	0
AT2G19860.2;AT2G19860.1	hexokinase 2 ; hexokinase 2	23.365	2;2	2;2	23248000	16985000	23386000	17396000	18070000	14839000	20357000	0	0	0	0	0	0	0	0	16429000	0	18043000	0	0
AT2G19880.1;AT2G19880.2	Nucleotide-diphospho-sugar transferases superfamily protein ; Nucleotide-diphospho-sugar transferases superfamily protein	2.7203	1;1	1;1	0	0	0	0	0	0	0	0	0	0	0	0	0	0	0	3642200	0	0	0	0
AT2G19940.2;AT2G19940.1	oxidoreductases, acting on the aldehyde or oxo group of donors, NAD or NADP as acceptor;copper ion binding ; oxidoreductases, acting on the aldehyde or oxo group of donors, NAD or NADP as acceptor;copper ion binding	40.987	4;4	4;4	52189000	63375000	91612000	92642000	82081000	84134000	78323000	60482000	72697000	85250000	64502000	70679000	63590000	105060000	67934000	49272000	89331000	79564000	79023000	0
AT2G20130.1;AT2G20120.1	like COV 1 ; Protein of unknown function (DUF502)	1.8812	1;1	1;1	0	0	0	0	0	0	0	0	0	0	0	0	0	0	0	0	0	0	0	16615000
AT4G29040.1;AT2G20140.1	regulatory particle AAA-ATPase 2A ; AAA-type ATPase family protein	296.48	13;13	13;13	1286000000	847160000	1008200000	1204800000	1282700000	1126900000	961890000	1058700000	1054100000	1108400000	1219500000	987180000	1134300000	926570000	951310000	987260000	981530000	1267000000	916820000	1057100000
AT2G20190.1	CLIP-associated protein	43.624	5	5	48442000	0	0	0	41695000	38302000	0	0	47059000	42822000	38291000	46589000	50064000	55701000	31870000	35525000	29570000	41536000	19287000	62141000
AT2G20270.1;AT2G20270.2	Thioredoxin superfamily protein ; Thioredoxin superfamily protein	23.201	2;1	2;1	55588000	55107000	61382000	58484000	53508000	41475000	67787000	37069000	86997000	53673000	0	55601000	66867000	103710000	46632000	45437000	0	54633000	37331000	0
AT2G20280.1	Zinc finger C-x8-C-x5-C-x3-H type family protein	3.6237	1	1	0	0	0	0	0	0	65677000	0	0	0	0	0	0	0	0	0	0	0	0	0
AT2G20360.1	NAD(P)-binding Rossmann-fold superfamily protein	143.92	10	10	374210000	319150000	393270000	381490000	337030000	309340000	383120000	288360000	367840000	456900000	357070000	438430000	355770000	368260000	265530000	330790000	420960000	395700000	232540000	458220000
AT2G20420.1	ATP citrate lyase (ACL) family protein	221.99	15	15	1880300000	1818500000	2018200000	2444800000	2542000000	1995100000	2937900000	1987400000	1858100000	1997900000	1920800000	2037600000	2003500000	3349100000	2206300000	2618400000	2340700000	2001700000	1371600000	2213700000
AT2G20450.1	Ribosomal protein L14	7.6196	4	1	0	0	0	0	0	0	0	0	0	0	0	0	0	0	0	0	0	0	186620000	0
AT2G20490.2;AT2G20490.1	nucleolar RNA-binding Nop10p family protein ; nucleolar RNA-binding Nop10p family protein	8.7047	1;1	1;1	0	0	0	0	0	0	0	0	0	0	0	0	0	0	0	0	0	0	0	85116000
AT2G20520.1	FASCICLIN-like arabinogalactan 6	8.1222	1	1	0	14170000	0	0	0	0	0	0	0	19354000	0	0	0	0	0	6388200	0	0	0	0
AT2G20530.2;AT2G20530.1	prohibitin 6 ; prohibitin 6	3.7632	5;5	2;2	0	0	0	0	0	0	0	0	0	0	0	0	0	0	0	0	0	0	0	116770000
AT2G20580.1	26S proteasome regulatory subunit S2 1A	323.31	22	16	1700000000	1481700000	1752000000	1861200000	1722000000	1832200000	2145900000	1730700000	1760000000	1806500000	1845600000	1797600000	1662600000	1885400000	1868400000	1779400000	1656000000	1646900000	1390000000	1724200000
AT2G20610.1;AT2G20610.2	Tyrosine transaminase family protein ; Tyrosine transaminase family protein	26.771	4;3	4;3	65180000	80400000	106970000	66004000	77113000	0	116290000	0	65797000	0	95901000	94318000	63197000	92489000	78715000	70578000	0	60875000	0	42506000
AT2G20630.1;AT2G20630.2	PP2C induced by AVRRPM1 ; PP2C induced by AVRRPM1	26.017	9;8;3;1;1	9;8;3;1;1	279880000	160530000	176850000	329790000	210580000	266240000	322930000	301560000	0	237500000	426590000	338340000	204840000	300210000	371150000	363870000	85593000	83714000	531190000	0
AT2G20760.1	Clathrin light chain protein	170.34	8	8	866840000	1091100000	973560000	908840000	490880000	1379500000	76086000	992070000	1299500000	946840000	1138500000	1506200000	1517000000	307720000	661520000	1012300000	549870000	1521000000	793610000	1336800000
AT2G20930.1	SNARE-like superfamily protein	30.623	2	2	0	0	43339000	0	0	0	33242000	24530000	0	48509000	0	0	0	0	0	0	0	0	0	0
AT2G20990.1;AT2G20990.2;AT2G20990.3	synaptotagmin A ; synaptotagmin A ; synaptotagmin A	44.52	4;4;4;1	4;4;4;1	80911000	78577000	0	64062000	43747000	36669000	0	0	0	0	67924000	0	62754000	0	0	51696000	123340000	0	0	0
AT2G21045.1	Rhodanese/Cell cycle control phosphatase superfamily protein	24.598	3	3	0	0	0	261500000	57365000	0	0	0	0	0	0	0	0	0	0	0	0	0	0	0
AT2G21060.1	glycine-rich protein 2B	213.24	2	2	457980000	416000000	367060000	432190000	296080000	207320000	634900000	292750000	371300000	431280000	544010000	422520000	581210000	592200000	270070000	344610000	583630000	486120000	346560000	524260000
AT2G21130.1	Cyclophilin-like peptidyl-prolyl cis-trans isomerase family protein	-2	7	1	0	0	0	0	0	0	0	0	0	0	0	0	0	0	0	0	0	0	103630000	0
AT2G21160.1;AT2G21160.2	Translocon-associated protein (TRAP), alpha subunit ; Translocon-associated protein (TRAP), alpha subunit	145.43	3;2	3;2	0	511200000	630660000	335110000	263920000	90341000	865590000	447030000	650660000	341730000	497990000	0	569340000	1049100000	0	194750000	812770000	0	481010000	293800000
AT2G21170.1;AT2G21170.2	triosephosphate isomerase ; triosephosphate isomerase	8.1038	4;3	3;3	47467000	0	43798000	0	0	0	48605000	0	41546000	48285000	37592000	38106000	47642000	40473000	0	56978000	34241000	0	40849000	0
AT2G21250.1;AT2G21250.2	NAD(P)-linked oxidoreductase superfamily protein ; NAD(P)-linked oxidoreductase superfamily protein	107.49	9;8;4	9;8;4	545960000	382680000	446730000	471440000	372980000	418490000	609140000	431370000	416340000	558630000	582810000	419320000	349390000	723260000	428910000	527800000	351050000	296050000	380890000	472380000
AT2G21270.2;AT2G21270.1;AT2G21270.3	ubiquitin fusion degradation 1 ; ubiquitin fusion degradation 1 ; ubiquitin fusion degradation 1	4.2354	1;1;1	1;1;1	0	0	0	0	0	0	0	0	0	0	0	0	0	0	0	0	0	0	0	2280800
AT2G21380.1;AT1G21730.1;AT4G39050.1	Kinesin motor family protein ; P-loop containing nucleoside triphosphate hydrolases superfamily protein ; Kinesin motor family protein	17.972	2;1;1	2;1;1	149560000	0	0	116730000	115070000	60528000	70431000	41523000	66710000	68307000	79712000	0	0	66870000	59086000	70181000	0	0	0	0
AT2G21390.1	Coatomer, alpha subunit	254.12	35	16	870740000	863700000	908300000	967960000	808210000	666250000	1017300000	859040000	838900000	888810000	974490000	909690000	984000000	1422500000	920550000	810660000	938400000	703880000	735920000	923790000
AT2G21410.1	vacuolar proton ATPase A2	4.4462	5	2	0	0	0	0	0	0	0	0	0	0	0	0	0	0	0	0	0	0	34067000	0
AT2G21470.1;AT2G21470.3;AT2G21470.2	SUMO-activating enzyme 2 ; SUMO-activating enzyme 2 ; SUMO-activating enzyme 2	12.092	2;2;2	2;2;2	0	0	0	0	0	0	0	0	0	0	0	0	35091000	0	0	0	0	0	0	0
AT2G21540.3;AT2G21540.2;AT2G21540.1	SEC14-like 3 ; SEC14-like 3 ; SEC14-like 3	-2	1;1;1	1;1;1	0	0	0	0	0	0	0	0	0	0	0	0	0	0	0	0	0	30503000	0	0
AT2G21580.2;AT2G21580.1	Ribosomal protein S25 family protein ; Ribosomal protein S25 family protein	39.144	3;3	1;1	0	0	0	0	0	0	0	0	0	0	0	0	0	0	0	0	0	0	0	105660000
AT2G21620.1;AT2G21620.2	Adenine nucleotide alpha hydrolases-like superfamily protein ; Adenine nucleotide alpha hydrolases-like superfamily protein	23.676	4;3	4;3	108110000	113550000	132650000	94526000	150560000	121950000	172820000	145660000	153280000	110410000	150890000	188100000	133810000	124180000	162610000	157890000	163840000	113250000	127520000	119270000
AT2G21660.1;AT2G21660.2	cold, circadian rhythm, and rna binding 2 ; cold, circadian rhythm, and rna binding 2	222.69	8;7	8;7	6379100000	5311600000	6119300000	3599600000	4815000000	3562200000	6011300000	5335300000	5893400000	4629900000	5442200000	4737100000	3605500000	3434700000	5327000000	2912600000	8796800000	4383100000	9884000000	4377100000
AT2G21790.1	ribonucleotide reductase 1	8.6663	1	1	0	0	0	0	0	0	0	0	0	0	0	0	0	0	0	0	0	0	0	3981500
AT2G21870.1;AT2G21870.2	copper ion binding;cobalt ion binding;zinc ion binding ; copper ion binding;cobalt ion binding;zinc ion binding	256.87	7;5	7;5	694050000	758150000	788690000	946020000	1077600000	1237400000	1159100000	999120000	909200000	834650000	727730000	1072100000	843140000	486040000	955560000	1261000000	1346100000	909510000	1058500000	918440000
AT2G22125.1	binding	323.31	28	28	768320000	616300000	580980000	716170000	614930000	492080000	585140000	458660000	746000000	839000000	690810000	635530000	746960000	794840000	535020000	599300000	677350000	687330000	493790000	817190000
AT2G22170.1	Lipase/lipooxygenase, PLAT/LH2 family protein	280.46	3	2	587100000	1146000000	887770000	874730000	655170000	464640000	821290000	405010000	863790000	1665400000	660240000	469640000	776120000	1098800000	506070000	344610000	546050000	957930000	1526300000	462400000
AT2G22230.1	Thioesterase superfamily protein	4.7904	2	2	0	0	0	0	0	0	0	0	95899000	0	0	0	0	0	0	0	0	0	0	0
AT2G22250.1;AT2G22250.3;AT2G22250.2	aspartate aminotransferase ; aspartate aminotransferase ; aspartate aminotransferase	12.47	3;3;3	3;3;3	124820000	154830000	136460000	142380000	89713000	212750000	46595000	162200000	142910000	103360000	131360000	124080000	138130000	97601000	121390000	122530000	50072000	151460000	0	0
AT2G22400.1	S-adenosyl-L-methionine-dependent methyltransferases superfamily protein	21.773	6;1	6;1	0	0	77961000	114840000	0	110900000	0	93402000	91406000	0	0	0	112190000	0	112880000	121010000	183670000	119980000	82629000	109270000
AT2G22425.2;AT2G22425.1	Microsomal signal peptidase 12 kDa subunit (SPC12) ; Microsomal signal peptidase 12 kDa subunit (SPC12)	22.519	1;1	1;1	0	0	0	0	0	0	0	0	0	0	0	0	0	0	0	0	0	0	0	63051000
AT2G22475.1;AT2G22475.2	GRAM domain family protein ; GRAM domain family protein	10.44	2;1	2;1	0	0	0	0	60149000	99614000	0	91938000	0	0	0	102520000	0	0	0	0	82714000	0	0	0
AT2G22480.1	phosphofructokinase 5	7.8445	3;1	2;0	82517000	77710000	0	0	72484000	64839000	71961000	0	65074000	60895000	0	0	73895000	79923000	69097000	101460000	77099000	59377000	0	87934000
AT2G22780.1	peroxisomal NAD-malate dehydrogenase 1	87.752	5;1;1;1;1	5;1;1;1;1	182910000	230310000	256020000	112970000	149360000	127620000	240900000	142300000	212380000	205190000	233560000	156430000	165480000	175270000	139960000	158860000	151280000	185260000	223610000	262910000
AT2G22795.1	unknown protein; BEST Arabidopsis thaliana protein match is: unknown protein (TAIR:AT4G37820.1); Has 799854 Blast hits to 188815 proteins in 4452 species: Archae - 4529; Bacteria - 144236; Metazoa - 287749; Fungi - 87083; Plants - 43826; Viruses - 3662; O	323.31	7	7	123010000	155040000	75746000	151110000	35499000	342810000	2376600	65209000	0	107120000	0	146950000	93898000	21241000	0	31375000	66327000	247920000	304630000	235300000
AT2G22900.1	Galactosyl transferase GMA12/MNN10 family protein	1.7936	2	2	0	0	0	0	0	0	0	7304900	0	0	0	0	0	0	0	0	0	0	0	0
AT2G22920.1;AT2G22920.2;AT2G22920.3	serine carboxypeptidase-like 12 ; serine carboxypeptidase-like 12 ; serine carboxypeptidase-like 12	6.0026	2;2;1	1;1;0	25440000	0	0	0	0	0	0	0	9366200	35845000	0	0	17246000	0	9436500	14366000	0	0	0	0
AT2G22970.1;AT2G22970.3;AT2G22970.2	serine carboxypeptidase-like 11 ; serine carboxypeptidase-like 11 ; serine carboxypeptidase-like 11	11.119	4;4;3	3;3;3	0	0	0	0	0	0	0	0	45019000	21997000	0	0	0	0	0	0	0	0	46017000	0
AT2G22980.2;AT2G22980.1;AT2G22980.3;AT2G22980.4;AT2G23000.1	serine carboxypeptidase-like 13 ; serine carboxypeptidase-like 13 ; serine carboxypeptidase-like 13 ; serine carboxypeptidase-like 13 ; serine carboxypeptidase-like 10	1.8079	1;1;1;1;1	1;1;1;1;1	28643000	32621000	24784000	25313000	0	118520000	0	143410000	0	23261000	122000000	0	0	1047500	18299000	7111700	23474000	63384000	0	106410000
AT2G23090.1	Uncharacterised protein family SERF	2.2135	1	1	0	0	0	0	0	0	0	0	0	0	0	0	0	0	0	0	0	0	0	10184000
AT2G23350.1	poly(A) binding protein 4	106.76	13	11	766290000	540470000	639490000	683290000	740040000	615730000	785180000	632540000	597220000	524740000	581760000	578990000	646460000	1044800000	684630000	615950000	705530000	574590000	581880000	671880000
AT2G23630.1	SKU5 similar 16	2.9193	3	2	0	0	0	0	0	0	0	0	0	0	0	0	0	0	0	0	0	0	16627000	0
AT2G23930.2;AT3G11500.1;AT2G23930.1	probable small nuclear ribonucleoprotein G ; Small nuclear ribonucleoprotein family protein ; probable small nuclear ribonucleoprotein G	6.3657	1;1;1	1;1;1	0	0	0	0	0	0	0	0	0	0	0	0	0	0	0	0	0	0	0	106050000
AT2G23940.1	Protein of unknown function (DUF788)	3.6059	1	1	0	0	0	0	0	0	0	0	0	0	0	0	0	0	0	0	0	0	0	6019300
AT2G24050.1	MIF4G domain-containing protein / MA3 domain-containing protein	6.023	4	4	72312000	70849000	126810000	76675000	0	70185000	74062000	53917000	0	73321000	0	65828000	65984000	64540000	0	46177000	117310000	77932000	0	0
AT2G24200.2;AT2G24200.1;AT2G24200.3	Cytosol aminopeptidase family protein ; Cytosol aminopeptidase family protein ; Cytosol aminopeptidase family protein	323.31	15;15;13	10;10;8	1794500000	1637500000	1640800000	1167000000	1567200000	1273600000	2362000000	1353200000	1531900000	1391200000	1606100000	1042700000	1164400000	2108300000	1294500000	1489700000	1790000000	1160100000	1750000000	1365500000
AT4G30996.1;AT2G24290.1	Protein of unknown function (DUF1068) ; Protein of unknown function (DUF1068)	5.901	2;2	2;2	0	0	0	0	0	0	0	0	0	0	0	0	0	0	0	0	0	0	27674000	0
AT2G24330.1	Protein of unknown function (DUF2296)	3.9855	1	1	0	0	0	0	0	0	0	0	0	0	0	0	0	0	0	0	0	0	14198000	0
AT2G24490.2;AT2G24490.1	replicon protein A2 ; replicon protein A2	7.9506	2;2	2;2	0	0	0	0	0	0	0	0	0	0	0	0	0	0	0	0	0	0	73293000	0
AT2G24500.1	Zinc finger protein 622	3.2732	1	1	0	0	0	0	0	0	0	0	0	0	0	0	0	0	0	0	28286000	0	0	0
AT2G24590.1	RNA recognition motif and CCHC-type zinc finger domains containing protein	4.1998	3	2	0	0	0	0	0	0	0	0	0	0	0	0	0	0	0	0	0	0	45696000	0
AT2G24765.1;AT2G24765.2	ADP-ribosylation factor 3 ; ADP-ribosylation factor 3	18.251	4;2	4;2	175310000	177470000	127080000	180270000	171710000	114100000	134110000	108040000	122870000	129770000	157600000	193410000	126620000	289920000	69557000	153110000	169860000	147380000	115030000	239720000
AT2G24940.1	membrane-associated progesterone binding protein 2	36.157	3	3	69535000	243750000	68414000	55764000	162590000	129690000	55282000	122660000	334510000	124550000	232970000	107550000	103480000	169070000	168880000	316020000	624930000	38749000	323520000	0
AT2G25110.1	stromal cell-derived factor 2-like protein precursor	12.015	1	1	0	0	0	0	0	0	0	0	0	0	0	0	0	0	0	0	0	0	0	145520000
AT2G25210.1;AT4G31985.1	Ribosomal protein L39 family protein ; Ribosomal protein L39 family protein	4.7143	1;1	1;1	0	0	0	0	704080000	0	0	0	0	0	0	0	0	0	0	0	0	211420000	0	0
AT2G25260.1	unknown protein; FUNCTIONS IN: molecular_function unknown; INVOLVED IN: biological_process unknown; LOCATED IN: endomembrane system; BEST Arabidopsis thaliana protein match is: unknown protein (TAIR:AT5G25265.1); Has 35333 Blast hits to 34131 proteins in	2.0411	1	1	0	0	0	0	0	0	0	0	0	0	0	0	0	0	0	0	0	6228500	0	0
AT2G25280.1	CONTAINS InterPro DOMAIN/s: UPF0103/Mediator of ErbB2-driven cell motility (Memo), related (InterPro:IPR002737); Has 1074 Blast hits to 1072 proteins in 474 species: Archae - 213; Bacteria - 366; Metazoa - 159; Fungi - 135; Plants - 54; Viruses - 0; Other	28.544	3	3	0	68708000	73248000	0	64943000	70878000	88050000	59271000	70478000	62076000	52904000	60596000	58300000	81626000	68406000	48655000	0	0	0	0
AT2G25355.2;AT2G25355.1	PNAS-3 related ; PNAS-3 related	3.2865	1;1	1;1	0	0	0	0	0	0	0	0	0	0	0	0	0	0	5223100	0	0	0	0	0
AT2G25450.1	2-oxoglutarate (2OG) and Fe(II)-dependent oxygenase superfamily protein	16.442	2	2	59166000	88144000	71853000	0	0	0	33891000	40142000	142360000	98886000	84488000	63738000	28804000	12476000	30946000	27464000	0	17223000	69020000	20806000
AT2G25540.1	cellulose synthase 10	8.0216	3;1	0;0	0	0	0	0	0	0	0	0	0	0	0	0	0	0	0	0	0	14513000	0	0
AT2G25630.1;AT2G44450.1;AT5G44640.1;AT5G42260.1	beta glucosidase 14 ; beta glucosidase 15 ; beta glucosidase 13 ; beta glucosidase 12	20.446	1;1;1;1	1;1;1;1	0	0	0	0	0	0	0	0	0	0	0	0	0	0	0	0	0	0	0	15458000
AT2G25670.2;AT2G25670.1	BEST Arabidopsis thaliana protein match is: copper ion binding (TAIR:AT4G32610.1); Has 43784 Blast hits to 26928 proteins in 1799 species: Archae - 86; Bacteria - 6347; Metazoa - 15971; Fungi - 5398; Plants - 1931; Viruses - 259; Other Eukaryotes - 13792	148.59	2;2	2;2	121050000	93900000	125600000	82911000	37268000	78285000	13797000	78983000	0	123840000	93891000	144940000	126830000	65615000	51168000	0	75662000	72175000	104710000	157880000
AT2G25800.1	Protein of unknown function (DUF810)	12.757	4	4	0	0	0	24043000	22858000	0	0	10819000	0	0	12250000	0	0	0	11582000	17958000	0	0	55939000	19548000
AT2G25810.1	tonoplast intrinsic protein 4;1	15.091	2	2	0	0	0	36199000	0	0	0	0	0	0	0	0	42554000	0	0	0	0	39080000	0	0
AT2G25970.1	KH domain-containing protein	65.216	7	7	2091900000	1504000000	2182800000	1862000000	1440400000	2713900000	2718400000	1655000000	2273900000	1606700000	1591900000	2340200000	1977000000	2799100000	1807500000	1933900000	0	2736300000	2735700000	2124200000
AT2G25980.1	Mannose-binding lectin superfamily protein	303.74	13	13	962710000	1224600000	951410000	1114000000	986750000	1301800000	1399000000	947970000	1070200000	1046800000	942100000	1143600000	1172000000	1590700000	955460000	989730000	1028600000	1217100000	1082700000	1173900000
AT2G26060.2;AT2G26060.1	Transducin/WD40 repeat-like superfamily protein ; Transducin/WD40 repeat-like superfamily protein	4.8808	2;2	2;2	0	0	0	0	0	0	0	0	0	0	0	0	0	0	0	0	0	0	79235000	0
AT2G26080.1	glycine decarboxylase P-protein 2	189.77	14	9	589040000	577820000	531000000	802500000	1114900000	811470000	963560000	690390000	507210000	467350000	565560000	745090000	648480000	1123900000	766870000	1034100000	1048000000	793770000	608560000	766630000
AT2G26140.1	FTSH protease 4	23.836	6	6	131310000	91348000	133170000	119640000	182480000	160140000	151800000	148430000	137830000	107530000	64086000	146060000	0	0	0	84470000	148040000	140380000	0	0
AT2G26230.1	uricase / urate oxidase / nodulin 35, putative	34.243	4	4	97182000	77356000	97368000	79640000	71601000	82383000	98554000	78232000	71276000	104150000	75932000	85406000	66863000	124380000	99118000	98963000	92314000	50893000	65385000	0
AT2G26300.1	G protein alpha subunit 1	2.4064	1	1	0	0	0	0	0	0	0	0	0	0	0	0	0	0	0	0	0	19656000	0	0
AT2G26590.3;AT2G26590.2;AT2G26590.1	regulatory particle non-ATPase 13 ; regulatory particle non-ATPase 13 ; regulatory particle non-ATPase 13	37.185	3;3;3	3;3;3	66496000	48136000	62446000	72261000	58989000	49154000	66996000	39951000	58957000	62094000	53935000	51569000	59594000	71864000	44420000	41936000	66813000	54092000	49322000	72386000
AT2G26640.1	3-ketoacyl-CoA synthase 11	6.6902	1	1	0	0	0	0	0	0	10303000	0	0	0	0	10787000	0	0	9125200	9763500	0	0	0	0
AT2G26730.1	Leucine-rich repeat protein kinase family protein	5.8639	2	2	0	0	0	0	0	0	0	0	0	0	0	0	0	0	0	0	0	22200000	0	0
AT2G26780.1	ARM repeat superfamily protein	62.732	5	5	52798000	55010000	46638000	40873000	34891000	33677000	0	28163000	42950000	90714000	40231000	41326000	52725000	60280000	39013000	34188000	39233000	0	0	45408000
AT2G26830.1	Protein kinase superfamily protein	5.8868	1	1	0	0	0	0	0	0	0	0	0	0	0	0	0	0	0	0	0	0	0	23992000
AT2G26890.1	DNAJ heat shock N-terminal domain-containing protein	15.618	2	2	19680000	24029000	0	0	18029000	0	18636000	0	0	21877000	16058000	15901000	18238000	16642000	14147000	18155000	15107000	25277000	13645000	0
AT2G26900.1	Sodium Bile acid symporter family	13.046	1	1	0	0	0	0	0	0	0	0	0	0	0	0	0	0	0	0	0	0	7181000	0
AT2G26990.1	proteasome family protein	29.47	4	4	79233000	62242000	75175000	87506000	69653000	52346000	74428000	43238000	71265000	104420000	86136000	68163000	70230000	95989000	51163000	45548000	36216000	114400000	58911000	82064000
AT2G27020.1	20S proteasome alpha subunit G1	42.485	6	6	803720000	616060000	530260000	204750000	369310000	875710000	236450000	881240000	787690000	544340000	564180000	634860000	485340000	140730000	622720000	569730000	616100000	543330000	630220000	766980000
AT5G21274.1;AT3G56800.1;AT3G43810.1;AT2G41110.1;AT2G27030.1;AT2G41110.2;AT2G27030.3;AT2G27030.2	calmodulin 6 ; calmodulin 3 ; calmodulin 7 ; calmodulin 2 ; calmodulin 5 ; calmodulin 2 ; calmodulin 5 ; calmodulin 5	313.35	6;6;6;6;6;6;6;4	2;2;2;2;2;2;2;1	1248100000	1603700000	1472600000	739790000	1360500000	852290000	1951100000	1119500000	1829200000	1398200000	781890000	1212900000	1359500000	1912200000	1177700000	1420000000	1646000000	1158100000	1023600000	1052700000
AT2G27040.2;AT2G27040.1	Argonaute family protein ; Argonaute family protein	6.8875	2;2	2;2	0	0	0	0	0	21336000	0	0	0	0	0	23023000	0	0	0	0	0	0	0	0
AT2G27100.1	C2H2 zinc-finger protein SERRATE (SE)	52.064	5	5	49998000	30869000	0	34622000	0	33075000	0	32321000	31019000	103920000	0	31651000	45431000	109540000	0	36162000	0	0	0	30157000
AT2G27450.1;AT2G27450.2	nitrilase-like protein 1 ; nitrilase-like protein 1	6.0603	2;2	2;2	0	0	0	112650000	0	0	0	0	0	0	0	0	0	0	0	0	0	124960000	0	0
AT2G27460.1	sec23/sec24 transport family protein	36.796	6	6	80497000	0	96409000	65912000	47697000	0	79391000	47138000	66788000	0	79457000	66009000	66494000	93394000	54913000	57133000	70590000	74684000	53257000	58344000
AT2G27510.1	ferredoxin 3	243.18	3	3	490350000	666500000	576960000	365200000	907650000	1029800000	368430000	557990000	445270000	668660000	348810000	418960000	448480000	995630000	683300000	634240000	1030800000	696310000	575800000	603580000
AT2G27530.2;AT2G27530.1	Ribosomal protein L1p/L10e family ; Ribosomal protein L1p/L10e family	299.5	7;7	4;4	1601700000	1207300000	1420300000	1435000000	3084800000	3185800000	2733600000	2613700000	1054800000	1168600000	1185400000	2017000000	1351100000	2830000000	1893100000	2685700000	1925000000	1808000000	1157000000	1602600000
AT2G27550.1	centroradialis	31.877	3	3	92970000	69266000	88775000	0	139870000	79051000	140880000	93573000	83844000	74732000	92178000	97591000	0	0	104960000	83684000	76783000	73798000	0	0
AT2G27600.1	AAA-type ATPase family protein	51.908	4	4	98622000	125800000	99293000	135080000	93506000	71743000	145240000	71549000	92866000	90036000	111340000	98272000	99905000	158720000	74781000	81976000	90567000	92691000	97746000	78523000
AT2G27710.3;AT2G27710.2;AT2G27710.1;AT2G27710.4	60S acidic ribosomal protein family ; 60S acidic ribosomal protein family ; 60S acidic ribosomal protein family ; 60S acidic ribosomal protein family	205.29	4;4;4;3	3;3;3;2	489420000	458030000	644780000	348330000	1358900000	1198800000	849990000	782630000	426270000	586720000	517550000	484980000	465940000	439040000	876900000	891030000	813910000	681400000	711390000	738080000
AT2G27720.1;AT2G27720.3;AT2G27720.2	60S acidic ribosomal protein family ; 60S acidic ribosomal protein family ; 60S acidic ribosomal protein family	175.94	4;3;3	3;2;2	176780000	164040000	245560000	209610000	463400000	542490000	388230000	294800000	223790000	181890000	231320000	226290000	225610000	192440000	285750000	352170000	287910000	341140000	330550000	362440000
AT2G27730.1	copper ion binding	104.01	3	3	0	326430000	525230000	0	0	346280000	0	0	393140000	0	1092500000	0	0	0	287650000	0	240350000	0	480040000	226220000
AT2G27820.1;AT1G08250.1	prephenate dehydratase 1 ; arogenate dehydratase 6	22.412	4;2	2;0	52739000	55497000	41327000	67486000	11093000	0	0	44459000	58411000	51766000	51198000	69376000	51875000	19848000	0	32485000	0	60879000	68101000	45791000
AT2G27840.1;AT2G27840.2	histone deacetylase-related / HD-related ; histone deacetylase-related / HD-related	3.0857	2;1	2;1	0	0	0	0	0	0	0	0	0	0	0	0	0	0	0	28608000	0	0	0	0
AT2G27860.1	UDP-D-apiose/UDP-D-xylose synthase 1	293.89	20	7	1874500000	1951300000	1874000000	1644700000	2596700000	1926600000	3071700000	1611200000	1981600000	1776700000	1685700000	1725100000	1737400000	2339000000	2436100000	2471300000	1654800000	2248400000	1761400000	1734300000
AT2G27970.1;AT2G27960.1	CDK-subunit 2 ; cyclin-dependent kinase-subunit 1	15.377	2;1	2;1	0	0	0	0	0	0	0	0	0	0	0	0	0	0	0	0	0	169600000	0	0
AT2G28000.1	chaperonin-60alpha	323.31	18	18	2358500000	2127300000	1880400000	2289200000	2529500000	2731100000	2507400000	2395600000	2375900000	1983000000	1975000000	1844200000	1902400000	2981200000	2425400000	2168600000	3184700000	2441700000	1811200000	2402300000
AT2G28080.1	UDP-Glycosyltransferase superfamily protein	3.7305	2	2	0	0	0	0	0	0	0	0	0	0	0	0	0	0	0	0	0	7125100	0	0
AT2G28430.1	unknown protein; Has 28 Blast hits to 28 proteins in 12 species: Archae - 0; Bacteria - 0; Metazoa - 0; Fungi - 0; Plants - 28; Viruses - 0; Other Eukaryotes - 0 (source: NCBI BLink).	15.042	3	3	0	107900000	0	0	0	0	0	0	0	0	0	0	0	0	0	0	0	0	0	0
AT2G28450.2;AT2G28450.1	zinc finger (CCCH-type) family protein ; zinc finger (CCCH-type) family protein	3.146	2;2	2;2	0	0	0	0	0	0	0	0	0	0	0	0	0	0	34672000	0	0	0	0	0
AT2G28520.1	vacuolar proton ATPase A1	14.752	2	2	0	0	45089000	0	0	0	0	0	36716000	32457000	0	0	48203000	0	0	0	27697000	0	0	0
AT2G28540.1;AT2G28540.2	RNA binding (RRM/RBD/RNP motifs) family protein ; RNA binding (RRM/RBD/RNP motifs) family protein	-2	1;1	1;1	0	0	0	0	0	0	0	0	0	0	0	0	0	0	0	0	0	0	0	7460300
AT2G28790.1	Pathogenesis-related thaumatin superfamily protein	18.664	5	5	0	0	0	0	0	0	0	0	0	142620000	0	0	0	0	0	0	0	0	0	0
AT2G29080.1	FTSH protease 3	24.955	3;1	3;1	68775000	50295000	123730000	99744000	77894000	69138000	87473000	69259000	74563000	71098000	77274000	73418000	74145000	0	67653000	67637000	53456000	84318000	65410000	46518000
AT2G29140.1	pumilio 3	-2	1	1	0	0	0	0	0	0	0	0	0	0	0	0	0	0	0	0	0	0	2200100000	0
AT2G29400.1	type one protein phosphatase 1	37.1	3;1;1;1;1	1;0;0;0;0	0	32456000	46049000	63158000	61098000	39253000	47258000	33284000	40753000	0	55187000	43988000	40046000	71254000	38031000	0	58650000	38791000	0	0
AT2G29420.1	glutathione S-transferase tau 7	9.9825	2	2	92782000	0	101740000	91626000	0	77224000	254320000	0	0	0	0	0	112680000	0	0	0	0	0	0	0
AT2G29450.1	glutathione S-transferase tau 5	3.3745	1	1	0	0	0	0	0	0	0	0	0	0	0	0	0	0	0	4685300	0	0	0	0
AT2G29490.1	glutathione S-transferase TAU 1	9.544	5	5	0	0	0	0	58985000	0	0	0	87733000	0	135700000	0	0	85368000	0	176750000	0	0	0	0
AT2G29530.2;AT2G29530.1;AT2G29530.3	Tim10/DDP family zinc finger protein ; Tim10/DDP family zinc finger protein ; Tim10/DDP family zinc finger protein	14.023	2;2;2	2;2;2	76298000	64503000	0	0	0	0	0	0	64239000	0	0	0	0	27639000	0	0	0	0	0	0
AT2G29550.1	tubulin beta-7 chain	209.91	21	3	579550000	481070000	485220000	521300000	1047200000	1115700000	1034600000	802660000	375970000	392550000	549070000	565660000	506170000	599180000	670120000	1052300000	628220000	1033700000	1053400000	684640000
AT2G29560.1	cytosolic enolase	5.8145	2	2	0	0	0	0	0	0	0	0	0	0	0	0	0	0	0	0	61223000	0	0	0
AT2G29570.1;AT1G07370.1	proliferating cell nuclear antigen 2 ; proliferating cellular nuclear antigen 1	12.205	3;2	3;2	0	0	0	0	0	0	0	0	0	0	0	0	0	0	177950000	0	65116000	0	185080000	0
AT2G29730.1	UDP-glucosyl transferase 71D1	4.2219	3	3	0	0	0	0	0	0	0	0	0	0	0	0	0	0	0	0	0	0	15739000	0
AT2G29750.1	UDP-glucosyl transferase 71C1	20.728	5	5	0	137060000	0	66171000	0	0	0	0	0	200470000	70509000	0	0	0	40513000	0	0	0	163790000	0
AT2G29980.1	fatty acid desaturase 3	19.035	1	1	0	0	0	0	0	0	0	0	0	0	0	0	0	0	0	0	0	0	0	22582000
AT2G30050.1	transducin family protein / WD-40 repeat family protein	54.297	8	7	332530000	390280000	233340000	291430000	203560000	423920000	32995000	550060000	729270000	325860000	720020000	272930000	150830000	89210000	334540000	339670000	364690000	333860000	799610000	223090000
AT2G30060.1	Pleckstrin homology (PH) domain superfamily protein	52.067	6	4	188360000	176790000	146960000	157810000	332260000	286780000	250690000	216780000	223670000	270750000	178660000	247490000	96164000	0	0	0	182400000	0	444320000	296120000
AT2G30105.1	CONTAINS InterPro DOMAIN/s: Leucine-rich repeat, typical subtype (InterPro:IPR003591), Leucine-rich repeat (InterPro:IPR001611), Ubiquitin (InterPro:IPR000626), Ubiquitin supergroup (InterPro:IPR019955); BEST Arabidopsis thaliana protein match is: Leucine	4.2245	2	2	0	0	0	0	0	0	0	0	0	0	0	0	0	0	0	0	0	0	0	12876000
AT2G30110.1	ubiquitin-activating enzyme 1	323.31	22	21	1299100000	1165100000	1021600000	1178400000	1187300000	990240000	1311700000	918970000	1049900000	1213300000	1154100000	1087300000	1032500000	1564000000	1099500000	1094200000	1007600000	899410000	966410000	1055600000
AT2G30200.1;AT2G30200.2	catalytics;transferases;[acyl-carrier-protein] S-malonyltransferases;binding ; catalytics;transferases;[acyl-carrier-protein] S-malonyltransferases;binding	225.46	10;8	10;8	789890000	781340000	712040000	765210000	878290000	757690000	784390000	627550000	785840000	867750000	755860000	681160000	865760000	804030000	692390000	774220000	687650000	699050000	708930000	793410000
AT2G30490.1	cinnamate-4-hydroxylase	164.25	14	14	672230000	651570000	872310000	775990000	820010000	455880000	956990000	732560000	663850000	852210000	884560000	769060000	751930000	810620000	799920000	657180000	527470000	624960000	417070000	934260000
AT2G30530.1	unknown protein; LOCATED IN: cellular_component unknown; EXPRESSED IN: 25 plant structures; EXPRESSED DURING: 15 growth stages; BEST Arabidopsis thaliana protein match is: unknown protein (TAIR:AT5G01970.1); Has 5513 Blast hits to 872 proteins in 154 spec	6.3014	1	1	0	0	0	0	0	0	0	0	0	0	0	0	0	0	0	0	0	0	0	5313600
AT2G30620.2;AT2G30620.1	winged-helix DNA-binding transcription factor family protein ; winged-helix DNA-binding transcription factor family protein	25.049	3;3;1	3;3;1	106540000	147530000	150230000	107460000	0	173480000	24766000	151020000	184320000	0	0	147850000	151870000	0	115470000	108590000	84180000	0	145810000	138840000
AT5G65940.2;AT5G65940.3;AT5G65940.1;AT2G30650.1	beta-hydroxyisobutyryl-CoA hydrolase 1 ; beta-hydroxyisobutyryl-CoA hydrolase 1 ; beta-hydroxyisobutyryl-CoA hydrolase 1 ; ATP-dependent caseinolytic (Clp) protease/crotonase family protein	1.9525	2;2;2;2	1;1;1;1	0	0	0	0	0	0	0	0	0	58319000	0	0	0	0	0	0	0	0	0	0
AT2G30860.1;AT2G30860.2	glutathione S-transferase PHI 9 ; glutathione S-transferase PHI 9	178.58	6;4	6;4	887210000	1588100000	1228300000	952230000	968870000	691130000	1428200000	948970000	1753400000	1201800000	1345500000	1243900000	1180400000	1344400000	1036200000	1595600000	1030200000	625880000	857900000	812560000
AT2G30870.1	glutathione S-transferase PHI 10	110.27	7	7	1187800000	1809400000	1891800000	1347100000	1237500000	702880000	1512600000	725490000	976090000	1540200000	1670100000	1471500000	1537300000	2498500000	1120900000	1255100000	1456600000	1385300000	1241600000	994400000
AT2G30900.1	TRICHOME BIREFRINGENCE-LIKE 43	-2	1	1	0	0	0	0	0	0	0	0	0	0	0	0	0	0	0	0	0	0	0	38491000
AT2G30930.1	unknown protein; FUNCTIONS IN: molecular_function unknown; INVOLVED IN: biological_process unknown; LOCATED IN: chloroplast, plasma membrane, membrane; EXPRESSED IN: 24 plant structures; EXPRESSED DURING: 14 growth stages; BEST Arabidopsis thaliana protei	119.13	4	4	231620000	356620000	181500000	197630000	261150000	141660000	355130000	181220000	174310000	285320000	157680000	233790000	159100000	383940000	192000000	232810000	216150000	185280000	267290000	0
AT2G30970.2;AT2G30970.1	aspartate aminotransferase 1 ; aspartate aminotransferase 1	183.48	15;15	15;15	778740000	634920000	629430000	743560000	1492300000	1316200000	1251100000	1058400000	630410000	640310000	733740000	1003800000	879240000	1268900000	1216200000	1179900000	1177800000	901620000	921860000	919830000
AT2G31060.2;AT2G31060.3	elongation factor family protein ; elongation factor family protein	6.4654	3;3;1	3;3;1	66957000	66101000	56808000	65898000	0	224050000	0	35343000	0	0	0	44732000	0	19796000	31404000	0	0	0	0	0
AT2G31240.1	Tetratricopeptide repeat (TPR)-like superfamily protein	20.931	2	2	35519000	0	0	48804000	0	69280000	0	0	0	0	39815000	55275000	147760000	9388500	0	21323000	20215000	25759000	0	0
AT2G31360.1	16:0delta9 desaturase 2	11.918	2	2	63349000	63878000	75333000	27089000	0	77578000	0	75425000	50778000	59598000	29421000	71808000	56361000	0	0	0	0	0	0	0
AT2G31390.1	pfkB-like carbohydrate kinase family protein	323.31	14;5;4;3;1	13;4;3;2;1	2990300000	3369400000	2748000000	2770100000	3528100000	2083500000	4479600000	2527900000	3000500000	4297200000	3464300000	2651600000	3311900000	4279900000	2880700000	2932000000	3679500000	2612600000	2588900000	3095700000
AT2G31490.1	unknown protein; Has 55 Blast hits to 55 proteins in 15 species: Archae - 0; Bacteria - 0; Metazoa - 0; Fungi - 0; Plants - 55; Viruses - 0; Other Eukaryotes - 0 (source: NCBI BLink).	4.3559	1	1	41119000	42411000	42906000	0	0	32110000	0	293800000	81018000	0	119740000	0	0	0	56655000	0	0	0	355400000	0
AT2G31570.1	glutathione peroxidase 2	30.391	3	3	0	99595000	117630000	0	0	94393000	288660000	0	106310000	105630000	133110000	100690000	90362000	0	122060000	0	0	0	235100000	0
AT2G31610.1	Ribosomal protein S3 family protein	7.2152	11	1	0	0	0	0	0	0	0	0	0	0	0	0	0	0	0	0	0	0	0	380550000
AT2G31660.1	ARM repeat superfamily protein	52.555	11	10	134680000	100220000	130980000	147680000	116280000	103260000	146610000	91304000	123220000	120230000	103470000	145090000	147970000	136090000	102850000	101160000	76597000	108380000	69351000	109300000
AT2G31670.1	Stress responsive alpha-beta barrel domain protein	35.913	6	6	0	202630000	0	239760000	357520000	178820000	263590000	0	232440000	0	0	0	0	0	256400000	0	304390000	217980000	267460000	265620000
AT2G31750.1	UDP-glucosyl transferase 74D1	51.966	5	5	116880000	145830000	197690000	270550000	218630000	151220000	202850000	159510000	241110000	200390000	231720000	200450000	158010000	234960000	187880000	107450000	167400000	161110000	192840000	155490000
AT2G31810.1;AT2G31810.2;AT2G31810.3	ACT domain-containing small subunit of acetolactate synthase protein ; ACT domain-containing small subunit of acetolactate synthase protein ; ACT domain-containing small subunit of acetolactate synthase protein	31.022	6;5;5	6;5;5	97995000	97338000	106510000	175540000	201230000	181490000	164270000	122910000	122970000	128720000	100910000	111540000	149880000	128910000	157990000	154010000	172970000	164210000	94057000	235370000
AT2G32060.3;AT2G32060.2;AT2G32060.1	Ribosomal protein L7Ae/L30e/S12e/Gadd45 family protein ; Ribosomal protein L7Ae/L30e/S12e/Gadd45 family protein ; Ribosomal protein L7Ae/L30e/S12e/Gadd45 family protein	146.75	7;7;7	5;5;5	1129600000	808610000	768070000	893290000	2150200000	1846700000	1393300000	1445000000	825010000	699910000	662010000	1482400000	848410000	2299600000	1742000000	1570900000	1789200000	1197200000	960590000	1156100000
AT2G32240.1	FUNCTIONS IN: molecular_function unknown; INVOLVED IN: response to cadmium ion; LOCATED IN: plasma membrane; EXPRESSED IN: 25 plant structures; EXPRESSED DURING: 13 growth stages; CONTAINS InterPro DOMAIN/s: Prefoldin (InterPro:IPR009053); BEST Arabidopsi	321.98	30	30	689870000	757190000	966090000	1008400000	699600000	866970000	1152300000	898930000	766810000	848620000	1066600000	818260000	798240000	517690000	782880000	791120000	568880000	880300000	802480000	696510000
AT2G32260.1	phosphorylcholine cytidylyltransferase	2.275	1	1	0	0	0	0	0	0	0	0	0	0	0	0	0	0	0	0	0	0	27004000	0
AT2G32380.1	Transmembrane protein 97, predicted	2.6846	1	1	0	0	0	0	0	0	0	0	0	0	0	0	0	0	0	5083600	0	0	0	0
AT2G32520.1	alpha/beta-Hydrolases superfamily protein	4.9185	1	1	0	0	0	0	0	0	0	0	0	0	0	0	0	0	0	0	0	0	96437000	0
AT2G32600.1	hydroxyproline-rich glycoprotein family protein	15.687	3	3	0	19482000	15040000	0	0	0	0	119160000	123290000	21646000	159910000	18104000	0	8879500	0	0	0	10414000	0	0
AT2G32620.1	cellulose synthase-like B	1.8991	1	1	0	0	0	0	0	0	0	0	0	0	0	0	0	0	0	0	0	0	187830000	0
AT2G32720.1	cytochrome B5 isoform B	4.0655	3	3	0	0	0	0	0	0	0	0	0	0	0	0	0	0	0	0	0	0	0	35544000
AT2G32730.1	26S proteasome regulatory complex, non-ATPase subcomplex, Rpn2/Psmd1 subunit	157.84	15	7	506720000	520780000	502160000	306860000	194450000	777870000	535740000	401430000	487000000	424890000	349190000	549860000	653110000	458230000	350990000	412250000	372240000	634260000	431640000	273230000
AT2G32850.1;AT2G32850.2	Protein kinase superfamily protein ; Protein kinase superfamily protein	21.5	2;2	2;2	0	0	0	0	0	0	0	0	0	0	0	0	0	0	0	0	0	0	39172000	0
AT2G32920.1	PDI-like 2-3	131.66	6	6	430300000	269550000	315960000	431080000	429680000	342730000	417960000	327700000	284050000	375080000	416500000	387100000	342180000	565360000	377460000	327960000	347750000	321600000	228500000	380090000
AT2G33040.1	gamma subunit of Mt ATP synthase	323.31	9	9	1294800000	1554800000	1829900000	1806800000	2114700000	1815400000	2705400000	1488100000	1835500000	1843400000	1684300000	1571300000	1522400000	2045900000	1871200000	1575000000	1833700000	1930000000	1562500000	1654600000
AT2G33150.1	peroxisomal 3-ketoacyl-CoA thiolase 3	147.24	9;2	8;1	360680000	444620000	402200000	354290000	284070000	219170000	566830000	297620000	385980000	369420000	394800000	310730000	316740000	544740000	266170000	367410000	419040000	410730000	294590000	227460000
AT2G33210.2;AT2G33210.1	heat shock protein 60-2 ; heat shock protein 60-2	144.19	20;20	13;13	1422400000	1448300000	1520700000	1270800000	1466700000	1131700000	1538700000	1018100000	1272900000	1404300000	1150000000	1092600000	1499100000	1714500000	1024600000	1072700000	1044600000	1531000000	1020800000	1358400000
AT2G33220.1	GRIM-19 protein	10.325	4	1	183760000	181490000	273060000	0	92629000	125830000	103810000	230180000	180530000	145190000	150310000	140050000	156550000	166600000	150570000	191700000	207390000	0	250830000	0
AT2G33340.2;AT2G33340.1;AT2G33340.3	MOS4-associated complex 3B ; MOS4-associated complex 3B ; MOS4-associated complex 3B	104.18	11;11;10	9;9;8	320580000	270670000	301960000	368460000	275810000	445500000	69313000	388030000	316410000	245080000	358160000	258160000	328700000	324220000	236630000	272130000	315620000	674280000	343160000	348770000
AT2G33410.1	RNA-binding (RRM/RBD/RNP motifs) family protein	15.852	4	4	0	246440000	156830000	259150000	222260000	79694000	245080000	129390000	146570000	34208000	140330000	177750000	121440000	313770000	184770000	188090000	253050000	157970000	113550000	134390000
AT2G33630.1	NAD(P)-binding Rossmann-fold superfamily protein	5.7452	1	1	0	0	0	0	0	0	0	0	0	0	0	0	0	0	0	0	0	0	0	12272000
AT2G33730.1	P-loop containing nucleoside triphosphate hydrolases superfamily protein	2.4298	1	1	0	0	0	0	0	0	0	0	0	0	0	0	0	0	0	0	0	15809000	0	0
AT2G33790.1	arabinogalactan protein 30	68.666	4	4	818750000	1053700000	478010000	367600000	141130000	311510000	225430000	492300000	1084100000	871070000	691150000	654390000	571150000	350140000	454090000	362610000	566100000	238800000	1325500000	631440000
AT2G33840.1	Tyrosyl-tRNA synthetase, class Ib, bacterial/mitochondrial	48.68	6	5	214660000	194920000	202390000	229310000	298070000	242290000	223070000	188110000	139250000	200090000	192400000	177060000	229400000	325560000	214540000	227500000	234480000	228350000	173500000	223280000
AT2G33845.1	Nucleic acid-binding, OB-fold-like protein	18.492	3	3	98752000	143910000	69806000	160540000	0	238340000	0	155700000	272380000	55503000	474750000	136260000	161960000	10483000	60867000	65211000	76241000	144220000	455210000	144350000
AT2G34040.1;AT2G34040.2	Apoptosis inhibitory protein 5 (API5) ; Apoptosis inhibitory protein 5 (API5)	31.189	6;4	6;4	81968000	104160000	116010000	177390000	135830000	128230000	126190000	92662000	119500000	125560000	105220000	102460000	86115000	146280000	93698000	47831000	151370000	121020000	61811000	105130000
AT2G34070.1	TRICHOME BIREFRINGENCE-LIKE 37	4.498	1	1	0	0	0	0	0	0	0	0	0	0	0	0	0	0	0	0	0	0	12967000	0
AT2G34160.1	Alba DNA/RNA-binding protein	7.6035	3	1	0	0	0	0	0	0	0	0	0	0	0	0	0	0	0	5449300	0	0	0	0
AT2G34260.2;AT2G34260.1	transducin family protein / WD-40 repeat family protein ; transducin family protein / WD-40 repeat family protein	1.6674	1;1	1;1	0	0	0	0	0	0	0	0	0	0	0	0	0	0	0	0	0	0	1965000	0
AT2G34300.2;AT2G34300.1	S-adenosyl-L-methionine-dependent methyltransferases superfamily protein ; S-adenosyl-L-methionine-dependent methyltransferases superfamily protein	195.73	10;10	7;7	52394000	87091000	46981000	65992000	0	77444000	30682000	132420000	67485000	0	106060000	0	0	0	80453000	0	105310000	81071000	113450000	102070000
AT2G34357.1	ARM repeat superfamily protein	33.237	4	4	33760000	21991000	33476000	41504000	31137000	14995000	33976000	23659000	28739000	38761000	24161000	36168000	33547000	34973000	21725000	25553000	0	34540000	0	28105000
AT2G34470.1;AT2G34470.2	urease accessory protein G ; urease accessory protein G	96.413	5;5	5;5	324200000	349030000	314490000	287070000	477990000	385350000	365130000	298440000	370390000	426800000	410070000	336820000	349000000	536710000	384590000	403470000	426890000	286670000	423130000	331270000
AT2G34480.1;AT1G29970.2	Ribosomal protein L18ae/LX family protein ; 60S ribosomal protein L18A-1	40.538	4;2	1;0	1140200000	1633400000	1387800000	654160000	525580000	2784700000	432200000	2227800000	1837700000	1233700000	1401100000	1698100000	1333400000	1283400000	1010700000	1049700000	0	3331800000	923370000	934180000
AT2G34510.1	Protein of unknown function, DUF642	-2	1	1	0	0	0	0	0	0	0	0	0	0	0	0	0	0	0	0	33082000	0	0	0
AT2G34560.1;AT2G34560.2	P-loop containing nucleoside triphosphate hydrolases superfamily protein ; P-loop containing nucleoside triphosphate hydrolases superfamily protein	117.51	9;9	9;9	547290000	566830000	523240000	588310000	513010000	311020000	678310000	391470000	500030000	375500000	473650000	564780000	434520000	739970000	378450000	462420000	400940000	454160000	297440000	543890000
AT2G34590.1	Transketolase family protein	53.331	2	1	0	128720000	125040000	99084000	126710000	80938000	111300000	112300000	0	136450000	0	146970000	199070000	210270000	90109000	141820000	0	101380000	0	69124000
AT2G34630.1;AT2G34630.2	geranyl diphosphate synthase 1 ; geranyl diphosphate synthase 1	235.1	3;3	3;3	130410000	82984000	100600000	87133000	83812000	56030000	123410000	43593000	74276000	92924000	107630000	72814000	107850000	153560000	70591000	131180000	73249000	205670000	52952000	0
AT2G34660.2;AT2G34660.1	multidrug resistance-associated protein 2 ; multidrug resistance-associated protein 2	34.838	3;3;1	2;2;0	0	32659000	41699000	37730000	31231000	26803000	39224000	34661000	27426000	27410000	0	0	0	0	0	32502000	0	26060000	29533000	0
AT2G34770.1	fatty acid hydroxylase 1	16.371	2	2	22701000	14964000	0	18160000	0	14382000	0	0	0	0	0	0	17023000	18959000	14078000	14265000	11299000	17457000	0	20195000
AT2G34970.1	Trimeric LpxA-like enzyme	7.5885	2	2	0	0	0	0	0	0	0	11748000	0	0	0	10739000	13235000	6661400	0	10394000	18072000	0	0	13332000
AT2G35010.2;AT2G35010.1	thioredoxin O1 ; thioredoxin O1	7.6689	2;2	2;2	0	0	0	29773000	0	0	0	0	0	0	0	0	0	0	0	0	0	0	0	0
AT2G35020.1	N-acetylglucosamine-1-phosphate uridylyltransferase 2	12.82	4	1	0	0	0	0	0	0	0	0	0	0	0	0	0	0	0	0	0	0	0	18632000
AT2G35040.2;AT2G35040.1	AICARFT/IMPCHase bienzyme family protein ; AICARFT/IMPCHase bienzyme family protein	20.029	7;7	7;7	197190000	186500000	272750000	355400000	177730000	239570000	321500000	206790000	285690000	186670000	225410000	266400000	294380000	244100000	175190000	167700000	175680000	370790000	214580000	129450000
AT2G35110.2;AT2G35110.1	transcription activators ; transcription activators	9.3505	1;1	1;1	0	0	0	0	0	0	0	0	0	0	0	0	0	0	0	0	0	0	5891600	0
AT2G35120.1	Single hybrid motif superfamily protein	158.26	4	4	1076000000	690500000	731000000	944450000	562580000	250420000	793100000	488920000	622920000	438180000	344550000	684080000	458760000	1891500000	566010000	632520000	471450000	1522000000	788990000	317250000
AT2G35190.1	novel plant snare 11	5.3142	1	1	0	0	0	0	0	0	0	0	0	0	0	0	0	0	0	0	0	0	29229000	0
AT2G35240.1	plastid developmental protein DAG, putative	7.5409	1	1	0	0	0	0	0	0	0	0	0	0	0	0	0	0	0	0	19852000	0	0	0
AT2G35605.1	SWIB/MDM2 domain superfamily protein	25.581	3	3	251520000	218210000	228140000	240160000	390990000	405780000	403440000	353130000	180660000	143100000	170780000	319050000	234260000	46519000	295850000	328680000	322080000	617230000	257410000	321370000
AT2G35630.1	ARM repeat superfamily protein	5.6688	4	4	50394000	0	0	35977000	35342000	0	0	0	0	36481000	0	44953000	0	38790000	0	21983000	0	0	0	0
AT2G35690.1	acyl-CoA oxidase 5	3.2878	1	1	0	0	0	0	0	0	0	0	0	0	0	0	0	6496100	0	0	0	0	0	0
AT2G35795.1	Chaperone DnaJ-domain superfamily protein	4.4238	1	1	0	0	0	0	0	0	0	0	0	0	0	0	0	0	0	0	9743700	0	0	0
AT2G35810.1	unknown protein; BEST Arabidopsis thaliana protein match is: unknown protein (TAIR:AT2G35830.2); Has 153 Blast hits to 153 proteins in 52 species: Archae - 0; Bacteria - 62; Metazoa - 0; Fungi - 0; Plants - 82; Viruses - 0; Other Eukaryotes - 9 (source: N	13.775	3;1;1	3;1;1	44663000	63332000	0	60421000	49683000	0	73757000	34555000	64841000	145870000	91722000	46772000	44899000	0	59317000	34192000	0	49518000	70460000	57034000
AT2G35840.3;AT2G35840.2;AT2G35840.1	Sucrose-6F-phosphate phosphohydrolase family protein ; Sucrose-6F-phosphate phosphohydrolase family protein ; Sucrose-6F-phosphate phosphohydrolase family protein	6.9503	2;2;2	1;1;1	0	0	56963000	0	0	0	0	78175000	0	0	0	0	0	0	72132000	0	0	0	0	0
AT2G35880.1	TPX2 (targeting protein for Xklp2) protein family	2.1637	1	1	0	0	0	0	0	0	0	0	0	0	0	0	0	0	0	0	0	0	0	0
AT2G35920.1	RNA helicase family protein	6.325	2	2	0	0	0	0	0	0	0	0	0	0	0	0	0	0	0	0	0	0	0	34204000
AT2G36060.1;AT2G36060.2	MMS ZWEI homologue 3 ; MMS ZWEI homologue 3	1.6535	3;2	1;1	0	0	0	0	0	0	0	0	0	0	0	0	0	0	0	0	0	0	17287000	0
AT2G36070.1	translocase inner membrane subunit 44-2	86.427	3	3	45889000	54483000	59631000	40952000	18264000	67806000	16342000	61412000	72205000	47595000	96607000	76641000	56257000	21234000	44657000	0	26366000	106750000	0	77259000
AT2G36130.1	Cyclophilin-like peptidyl-prolyl cis-trans isomerase family protein	2.4266	1	1	0	0	0	0	0	0	0	79139000	0	0	0	0	0	0	0	0	0	0	0	0
AT2G36145.1	unknown protein; FUNCTIONS IN: molecular_function unknown; INVOLVED IN: biological_process unknown; LOCATED IN: chloroplast thylakoid membrane, chloroplast stroma, chloroplast; EXPRESSED IN: 19 plant structures; EXPRESSED DURING: 13 growth stages; Has 49	4.7703	1	1	0	0	0	0	0	0	0	0	0	0	0	0	0	0	0	0	0	0	81015000	0
AT2G36160.1	Ribosomal protein S11 family protein	2.3149	6	1	0	0	0	0	0	0	0	0	0	0	0	0	0	0	0	510340000	0	0	0	0
AT2G36200.1;AT2G36200.2	P-loop containing nucleoside triphosphate hydrolases superfamily protein ; P-loop containing nucleoside triphosphate hydrolases superfamily protein	4.1194	1;1	1;1	0	0	0	0	0	0	0	0	0	0	0	0	0	0	0	0	0	0	0	2575100
AT2G36250.2;AT2G36250.1;AT3G52750.1	Tubulin/FtsZ family protein ; Tubulin/FtsZ family protein ; Tubulin/FtsZ family protein	74.546	5;5;3	5;5;3	0	0	52325000	75852000	0	0	0	47842000	61655000	0	0	59987000	0	70673000	55280000	75604000	0	67550000	0	62813000
AT2G36290.1	alpha/beta-Hydrolases superfamily protein	120.55	4;1	4;1	114440000	118800000	116440000	153850000	125060000	114070000	168340000	138150000	118980000	137280000	151900000	109830000	101890000	76108000	113500000	167610000	62835000	124540000	0	131460000
AT2G36310.1	uridine-ribohydrolase 1	36.017	3	3	0	60403000	55255000	0	54032000	44151000	52116000	36655000	39972000	66109000	56186000	45430000	0	46819000	38638000	43633000	30999000	41754000	46352000	0
AT2G36380.1	pleiotropic drug resistance 6	13.737	7;1	7;1	0	108210000	105290000	0	71447000	65544000	81742000	58180000	64045000	165560000	106980000	117270000	117570000	0	82081000	87590000	96615000	83258000	0	0
AT2G36460.1;AT2G36460.2	Aldolase superfamily protein ; Aldolase superfamily protein	18.484	12;8	5;3	136550000	98600000	174080000	114690000	136910000	80055000	249010000	112980000	127070000	126250000	152500000	126440000	94643000	92866000	133170000	118070000	174500000	64514000	93191000	184480000
AT2G36530.1	Enolase	323.31	20	20	10600000000	11454000000	12377000000	9601300000	11271000000	10591000000	17386000000	10401000000	11143000000	12280000000	13839000000	10525000000	10746000000	16225000000	10678000000	10213000000	13344000000	11416000000	10425000000	8683000000
AT2G36580.1	Pyruvate kinase family protein	323.31	14	6	2175800000	2222000000	2259900000	1990400000	1864100000	2035100000	2597300000	1818300000	2119300000	2811200000	2824400000	2205600000	2246800000	2954900000	2067700000	1914800000	2332900000	1719900000	1773600000	2053100000
AT3G53020.1;AT2G36620.1	Ribosomal protein L24e family protein ; ribosomal protein L24	4.4667	2;2	2;2	1386900000	1215200000	2204600000	0	0	638100000	1514100000	808730000	0	258960000	0	0	1273300000	3362200000	0	1543300000	0	849030000	0	0
AT2G36830.1	gamma tonoplast intrinsic protein	29.277	2	2	355250000	483670000	490330000	220870000	220710000	133020000	399860000	253970000	418950000	713910000	328100000	253640000	283160000	309740000	254990000	302140000	267280000	127550000	424330000	820660000
AT2G36850.1	glucan synthase-like 8	8.4238	1	1	0	0	0	0	0	0	0	0	0	0	0	0	0	0	0	0	0	0	14347000	0
AT2G36880.2;AT2G36880.1	methionine adenosyltransferase 3 ; methionine adenosyltransferase 3	323.31	20;20	12;12	3952000000	4084100000	3773900000	4107700000	4511900000	2801400000	4863500000	3362900000	5241000000	5422000000	3456400000	4001400000	4416500000	6367200000	4888600000	4326800000	5086500000	3692100000	2732400000	3370400000
AT2G37040.1	PHE ammonia lyase 1	323.31	23	18	1437300000	1302900000	2000900000	1210800000	1918000000	1554500000	3312700000	1872700000	1357000000	1278300000	2201000000	1799900000	1740700000	1764700000	2335800000	1967700000	1261800000	1796200000	1679600000	1495900000
AT2G37130.2;AT2G37130.1	Peroxidase superfamily protein ; Peroxidase superfamily protein	210.09	11;11	11;11	389120000	1159200000	241420000	244050000	650930000	267430000	596240000	319890000	723780000	904700000	356220000	389450000	261930000	496830000	348760000	1398200000	471990000	273720000	1368100000	252400000
AT2G37170.1	plasma membrane intrinsic protein 2	40.756	4	3	252100000	224260000	147210000	181270000	229970000	261460000	332970000	148890000	164680000	299560000	198320000	172410000	221430000	157700000	147930000	323810000	320990000	127600000	411330000	285380000
AT2G37190.1	Ribosomal protein L11 family protein	36.965	7	1	0	0	0	0	0	0	0	0	0	0	0	0	0	0	0	0	0	0	0	47531000
AT2G37220.1	RNA-binding (RRM/RBD/RNP motifs) family protein	167.49	5	4	155370000	106100000	105990000	95442000	0	144680000	58147000	139950000	137910000	148820000	180020000	164160000	0	135860000	101970000	91963000	116950000	245840000	198930000	113590000
AT2G37230.1	Tetratricopeptide repeat (TPR)-like superfamily protein	3.4964	3	3	0	0	0	0	0	0	0	0	0	0	0	0	0	0	0	0	103970000	0	0	0
AT2G37250.1	adenosine kinase	56.122	7	7	151270000	128640000	142170000	105820000	191410000	145090000	202450000	132430000	103990000	0	131200000	127420000	140090000	340340000	155680000	160490000	175600000	0	106060000	0
AT2G37260.2	WRKY family transcription factor family protein	-2	1	1	0	0	0	0	0	0	0	0	0	0	0	0	0	0	0	0	0	0	0	121440000
AT2G37270.2;AT2G37270.1	ribosomal protein 5B ; ribosomal protein 5B	323.31	13;13	3;3	4879800000	4223500000	4293500000	5151900000	4219300000	2680200000	7512200000	3866300000	5833500000	7831400000	5763100000	3944800000	4105400000	4938700000	4084300000	3547700000	3614200000	4930400000	2701500000	3163600000
AT2G37410.2;AT2G37410.1	translocase inner membrane subunit 17-2 ; translocase inner membrane subunit 17-2	30.687	5;5	5;5	138920000	85255000	170330000	214790000	86114000	189860000	23008000	113540000	146920000	94962000	118220000	74034000	153050000	88449000	74119000	61349000	0	176290000	102100000	155850000
AT2G37550.2;AT2G37550.1	ARF-GAP domain 7 ; ARF-GAP domain 7	15.98	2;2	2;2	0	0	0	0	0	0	0	0	0	95190000	65733000	113990000	95252000	0	0	0	0	0	0	0
AT2G37600.2;AT2G37600.1	Ribosomal protein L36e family protein ; Ribosomal protein L36e family protein	2.1267	2;2	1;1	0	0	0	0	0	0	0	0	0	0	0	0	0	0	0	0	30686000	0	0	0
AT3G53750.1;AT2G37620.2;AT2G37620.1	actin 3 ; actin 1 ; actin 1	20.067	13;13;13	2;2;2	346920000	216660000	266530000	365520000	583360000	427750000	458550000	380790000	294870000	232420000	256240000	360250000	221780000	565140000	357480000	331340000	470310000	291210000	222000000	464460000
AT2G37690.1;AT2G05140.1	phosphoribosylaminoimidazole carboxylase, putative / AIR carboxylase, putative ; phosphoribosylaminoimidazole carboxylase family protein / AIR carboxylase family protein	11.099	4;2	4;2	0	0	96076000	92131000	0	124890000	141660000	158100000	109700000	92209000	98950000	123850000	99918000	202040000	205840000	104390000	157970000	133480000	62573000	0
AT2G37760.2;AT2G37760.1;AT2G37760.4;AT2G37760.3;AT2G37760.5	NAD(P)-linked oxidoreductase superfamily protein ; NAD(P)-linked oxidoreductase superfamily protein ; NAD(P)-linked oxidoreductase superfamily protein ; NAD(P)-linked oxidoreductase superfamily protein ; NAD(P)-linked oxidoreductase superfamily protein	78.411	8;8;7;7;7	8;8;7;7;7	240000000	165760000	225500000	185990000	245030000	159370000	396820000	190430000	225670000	165920000	255660000	199280000	217290000	180110000	248450000	218360000	146780000	214470000	117090000	207110000
AT2G37770.2;AT2G37770.1	NAD(P)-linked oxidoreductase superfamily protein ; NAD(P)-linked oxidoreductase superfamily protein	2.2736	3;2	2;1	0	0	0	0	0	0	0	0	0	0	0	0	0	0	0	0	0	0	0	20068000
AT2G37790.1	NAD(P)-linked oxidoreductase superfamily protein	42.109	4	3	89365000	85958000	0	91185000	0	114880000	41295000	0	128820000	0	88308000	0	0	0	0	65652000	0	115810000	99534000	83946000
AT2G37990.1	ribosome biogenesis regulatory protein (RRS1) family protein	3.4673	2	2	0	0	0	0	0	145510000	0	0	0	0	36109000	0	0	0	0	0	0	55380000	0	0
AT2G38040.2;AT2G38040.1	acetyl Co-enzyme a carboxylase carboxyltransferase alpha subunit ; acetyl Co-enzyme a carboxylase carboxyltransferase alpha subunit	259.14	11;11	11;11	766250000	748660000	784050000	855400000	1137600000	1229300000	1083500000	886500000	761820000	878480000	857080000	783260000	752830000	1441600000	1017000000	913400000	907890000	885970000	542220000	1104500000
AT2G38280.2;AT2G38280.1	AMP deaminase, putative / myoadenylate deaminase, putative ; AMP deaminase, putative / myoadenylate deaminase, putative	7.136	4;4	4;4	0	0	0	0	0	0	0	0	0	0	0	0	0	0	0	0	0	13571000	20446000	0
AT2G38360.1	prenylated RAB acceptor 1.B4	25.009	3	3	233040000	151000000	177890000	200210000	486920000	210330000	307970000	168320000	155160000	177370000	177710000	190450000	205260000	200960000	163500000	234030000	226560000	194360000	230250000	201210000
AT2G38380.1	Peroxidase superfamily protein	3.6169	1	1	0	0	0	0	0	0	0	0	0	0	0	0	0	0	0	0	0	0	30111000	0
AT2G38410.1	ENTH/VHS/GAT family protein	1.5915	1	1	0	0	0	0	0	0	0	0	0	0	0	0	0	0	0	0	0	0	0	13879000
AT2G38550.1	Transmembrane proteins 14C	23.494	3	3	0	0	0	0	0	0	0	0	70377000	0	0	0	0	0	0	0	87229000	86973000	0	0
AT2G38620.2;AT2G38620.1;AT3G54180.1	cyclin-dependent kinase B1;2 ; cyclin-dependent kinase B1;2 ; cyclin-dependent kinase B1;1	1.8182	2;1;1	2;1;1	0	0	0	0	0	0	0	0	0	0	0	0	0	0	13726000	0	0	0	0	0
AT2G38670.1	phosphorylethanolamine cytidylyltransferase 1	3.6904	1	1	0	0	0	0	0	0	0	0	0	0	0	0	0	0	0	0	0	0	0	38494000
AT2G38700.1	mevalonate diphosphate decarboxylase 1	101.75	9;1	9;1	447060000	536660000	537390000	636750000	767410000	374790000	775570000	588530000	668180000	556430000	583550000	470730000	559840000	789260000	704490000	647750000	722570000	500020000	435450000	530080000
AT2G38710.2;AT2G38710.1	AMMECR1 family ; AMMECR1 family	1.7722	1;1	1;1	0	0	0	0	0	0	0	0	0	0	0	0	0	0	0	0	15486000	0	0	0
AT2G38740.1	Haloacid dehalogenase-like hydrolase (HAD) superfamily protein	20.367	1	1	0	0	0	0	0	0	0	0	0	0	0	0	0	0	0	0	0	0	0	14398000
AT2G38750.1	annexin 4	46.001	4	4	93790000	124370000	128210000	77769000	102970000	71873000	138340000	98144000	149450000	161380000	127340000	72279000	97103000	141110000	105620000	105220000	0	87596000	105440000	71076000
AT2G38760.1	annexin 3	4.3359	1	1	0	0	0	0	0	0	0	0	0	0	0	0	0	0	0	0	11505000	0	0	0
AT2G38770.1	P-loop containing nucleoside triphosphate hydrolases superfamily protein	21.249	5	5	53204000	56673000	59875000	86833000	74985000	57569000	38059000	0	0	0	0	30404000	0	0	61122000	54957000	75371000	96956000	0	0
AT3G54560.1;AT2G38810.3;AT2G38810.2;AT2G38810.1	histone H2A 11 ; histone H2A 8 ; histone H2A 8 ; histone H2A 8	131.22	3;3;3;3	1;1;1;1	0	0	0	0	0	0	0	0	0	0	0	0	0	0	0	0	0	154030000	0	0
AT2G38840.1	Guanylate-binding family protein	64.364	1	1	0	0	0	0	0	0	0	0	0	0	0	0	0	0	0	0	0	0	0	11544000
AT2G38960.1;AT2G38960.2;AT2G38960.3	endoplasmic reticulum oxidoreductins 2 ; endoplasmic reticulum oxidoreductins 2 ; endoplasmic reticulum oxidoreductins 2	5.5291	1;1;1	1;1;1	0	0	0	0	0	0	0	0	0	0	0	0	0	0	0	0	0	11631000	0	0
AT2G39020.1	Acyl-CoA N-acyltransferases (NAT) superfamily protein	78.111	3	3	60395000	47778000	59921000	0	86498000	71294000	56919000	0	0	0	0	57608000	0	0	0	67077000	0	0	0	53175000
AT2G39040.1	Peroxidase superfamily protein	83.707	2	2	25388000	38398000	0	0	0	0	0	20298000	57648000	47263000	0	28036000	0	0	0	0	29555000	0	32076000	0
AT2G39310.3;AT2G39310.1;AT2G39330.1	jacalin-related lectin 22 ; jacalin-related lectin 22 ; jacalin-related lectin 23	1.9925	1;1;1	1;1;1	0	0	0	0	0	0	0	0	0	0	0	0	0	0	0	17125000	0	0	0	0
AT2G39390.1	Ribosomal L29 family protein	1.5909	3	1	0	0	0	0	0	0	0	0	0	0	0	0	0	0	1639700	0	0	0	0	0
AT3G55280.3;AT3G55280.2;AT3G55280.1;AT2G39460.2;AT2G39460.1	ribosomal protein L23AB ; ribosomal protein L23AB ; ribosomal protein L23AB ; ribosomal protein L23AA ; ribosomal protein L23AA	52.443	4;4;4;4;4	4;4;4;4;4	4171000000	3014900000	3430000000	4920600000	2640300000	8833000000	346750000	3174700000	2181000000	1705300000	7925300000	3960200000	4454100000	2563700000	1043000000	3787100000	3380700000	5510200000	2520600000	2361600000
AT2G39670.1;AT2G39670.2	Radical SAM superfamily protein ; Radical SAM superfamily protein	9.6795	1;1	1;1	0	0	0	0	0	0	0	0	0	0	0	0	0	0	0	0	0	12280000	0	0
AT2G39730.3;AT2G39730.2;AT2G39730.1	rubisco activase ; rubisco activase ; rubisco activase	6.0077	1;1;1	1;1;1	0	0	0	0	0	0	0	0	0	0	0	0	0	0	0	0	0	0	0	12390000
AT2G39770.2;AT2G39770.1	Glucose-1-phosphate adenylyltransferase family protein ; Glucose-1-phosphate adenylyltransferase family protein	110.85	6;6;2	6;6;2	212620000	257190000	215100000	257020000	183530000	185610000	255380000	163260000	273450000	265120000	134020000	215260000	204630000	290650000	144400000	110140000	153880000	254700000	157780000	185480000
AT2G39780.1;AT2G39780.2	ribonuclease 2 ; ribonuclease 2	8.4576	2;1	2;1	0	50218000	0	38693000	0	26207000	31780000	0	46166000	47708000	0	26778000	0	35295000	33166000	0	0	30305000	27479000	0
AT2G39800.2;AT2G39800.3;AT2G39800.4;AT2G39800.1	delta1-pyrroline-5-carboxylate synthase 1 ; delta1-pyrroline-5-carboxylate synthase 1 ; delta1-pyrroline-5-carboxylate synthase 1 ; delta1-pyrroline-5-carboxylate synthase 1	121.38	12;12;12;12	9;9;9;9	341110000	538000000	433370000	368430000	391530000	357230000	561590000	347770000	413440000	456970000	363780000	409900000	411660000	481750000	406690000	412360000	272200000	335650000	303580000	409720000
AT2G39900.1	GATA type zinc finger transcription factor family protein	2.3803	1	1	0	0	0	0	0	0	0	0	0	0	0	0	0	0	0	0	0	0	17698000	0
AT2G39960.1	Microsomal signal peptidase 25 kDa subunit (SPC25)	4.5575	2	2	0	0	0	0	0	0	0	0	0	0	0	54463000	0	0	0	0	0	0	0	0
AT2G39970.1	Mitochondrial substrate carrier family protein	7.8667	2	2	0	0	0	0	13100000	0	13056000	7779200	14478000	14788000	12551000	13778000	14917000	13985000	11822000	12709000	0	0	0	13904000
AT2G39990.1	eukaryotic translation initiation factor 2	273.71	11	11	632150000	639620000	815960000	917130000	924450000	619980000	786450000	536100000	663720000	720120000	485550000	668160000	752370000	998470000	646000000	679440000	672560000	737380000	507330000	471620000
AT2G40060.1	Clathrin light chain protein	20.42	4	4	153160000	136130000	122540000	190260000	0	192910000	66325000	210240000	170900000	0	175440000	151310000	132960000	0	86590000	0	125130000	89729000	332520000	0
AT2G40190.1	UDP-Glycosyltransferase superfamily protein	4.4572	1	1	0	0	0	0	0	0	0	0	0	0	0	0	0	0	0	0	0	0	0	2057600
AT2G40290.1;AT2G40290.3;AT2G40290.2	Eukaryotic translation initiation factor 2 subunit 1 ; Eukaryotic translation initiation factor 2 subunit 1 ; Eukaryotic translation initiation factor 2 subunit 1	104.76	6;3;3	6;3;3	343860000	295560000	386060000	371030000	450180000	381040000	234160000	367810000	435510000	362200000	401530000	347390000	277960000	140970000	464880000	393490000	436640000	392570000	625360000	369560000
AT2G40300.1	ferritin 4	2.1337	2	1	0	0	0	0	0	0	0	0	0	0	0	0	0	0	0	0	0	0	0	20973000
AT2G40360.1	Transducin/WD40 repeat-like superfamily protein	4.5873	2	2	0	0	0	0	0	0	0	0	0	0	0	0	0	0	0	0	48151000	0	0	0
AT2G40430.3;AT2G40430.1;AT2G40430.2	FUNCTIONS IN: molecular_function unknown; INVOLVED IN: biological_process unknown; LOCATED IN: cellular_component unknown; EXPRESSED IN: 22 plant structures; EXPRESSED DURING: 13 growth stages; CONTAINS InterPro DOMAIN/s: Tumour suppressor protein Gltscr2	1.7385	2;2;2	2;2;2	0	0	0	0	0	0	0	0	0	0	0	0	0	35243000	0	0	0	0	0	0
AT2G40510.1	Ribosomal protein S26e family protein	22.558	5	1	0	0	0	0	0	0	0	0	0	0	0	0	0	0	0	0	0	0	0	339620000
AT2G40590.1	Ribosomal protein S26e family protein	24.376	6	2	680230000	710960000	603050000	314090000	42840000	500080000	8373600	1433000000	2021200000	879540000	1407900000	1357900000	211090000	20912000	391770000	153330000	0	129170000	1012500000	1662500000
AT2G40600.1	appr-1-p processing enzyme family protein	12.801	2	2	0	0	0	0	0	0	0	0	0	0	0	0	0	0	0	0	0	37559000	0	0
AT2G40620.1	Basic-leucine zipper (bZIP) transcription factor family protein	9.1468	1	1	0	0	0	0	0	0	0	0	0	0	0	0	0	0	0	0	0	0	17772000	0
AT2G40660.1	Nucleic acid-binding, OB-fold-like protein	97.251	11	11	445750000	398370000	516970000	345850000	445950000	442880000	542970000	297650000	316400000	337320000	422090000	394600000	429810000	545420000	278840000	394680000	384660000	436800000	304630000	367740000
AT2G40730.1	Protein kinase family protein with ARM repeat domain	28.638	1	1	0	0	0	0	0	0	0	0	0	0	0	0	0	0	0	0	6593400	0	0	0
AT2G40765.1	unknown protein; FUNCTIONS IN: molecular_function unknown; INVOLVED IN: biological_process unknown; LOCATED IN: mitochondrion, mitochondrial respiratory chain complex III; EXPRESSED IN: 24 plant structures; EXPRESSED DURING: 15 growth stages; Has 32 Blast	3.2478	1	1	0	0	0	0	0	0	0	0	0	0	0	0	0	0	0	0	0	0	0	75997000
AT2G40840.1	disproportionating enzyme 2	58.711	9	9	189290000	167690000	168660000	193060000	153660000	139090000	133780000	95605000	178900000	282980000	166300000	155770000	198810000	186670000	123610000	187580000	157030000	226130000	121660000	183740000
AT2G40940.1	ethylene response sensor 1	2.0571	1	1	0	0	0	0	0	0	0	0	0	0	0	0	0	0	0	0	0	0	0	2161400
AT2G41220.1	glutamate synthase 2	211.3	23;4;4	23;4;4	555450000	715480000	477910000	442530000	632020000	598950000	942170000	608370000	732440000	695290000	676980000	546410000	513250000	652480000	567850000	811410000	666950000	411020000	855400000	641200000
AT2G41380.1	S-adenosyl-L-methionine-dependent methyltransferases superfamily protein	38.393	1	1	0	0	0	0	0	0	0	0	0	0	0	0	0	0	0	0	0	0	0	26944000
AT2G41530.1	S-formylglutathione hydrolase	114.14	7	7	240950000	211750000	206420000	173600000	285570000	271750000	422250000	200340000	237530000	312120000	216250000	221500000	205750000	297830000	261680000	239090000	218150000	232450000	271280000	317570000
AT2G41560.1	autoinhibited Ca(2+)-ATPase, isoform 4	5.7526	2	1	0	0	0	0	0	0	0	0	0	0	0	0	0	0	0	0	0	0	0	13142000
AT2G41620.1;AT3G57350.1	Nucleoporin interacting component (Nup93/Nic96-like) family protein ; Nucleoporin interacting component (Nup93/Nic96-like) family protein	3.0812	2;1	2;1	0	0	0	0	0	0	0	0	0	0	0	0	0	15593000	0	0	0	0	0	0
AT2G41630.1	transcription factor IIB	10.03	2	2	0	0	0	0	0	0	0	0	33954000	0	0	0	0	0	0	0	0	0	0	18030000
AT2G41740.1	villin 2	123.02	23	20	683060000	870000000	702910000	784090000	535660000	979060000	737780000	861030000	1223100000	903190000	1006800000	888330000	868440000	339870000	982560000	902700000	494290000	1032500000	835000000	1214800000
AT2G41790.1	Insulinase (Peptidase family M16) family protein	20.112	5	5	58274000	76884000	112070000	114180000	78192000	65043000	79449000	28966000	67620000	0	0	0	79894000	92139000	63427000	52358000	69022000	73069000	0	45750000
AT2G41800.1	Protein of unknown function, DUF642	61.63	11	11	822420000	837870000	610300000	945170000	845620000	859050000	1053300000	629870000	969720000	863900000	687800000	774990000	603100000	1179000000	727640000	559360000	856450000	671950000	605610000	903640000
AT2G41840.1	Ribosomal protein S5 family protein	306.97	9	4	3917800000	2909500000	3259200000	5102700000	6212400000	4995600000	4962800000	3464500000	2475400000	2375600000	2754300000	3972800000	3435500000	3354800000	3979800000	3912700000	3539300000	5719700000	3450600000	4434400000
AT2G41970.1;AT1G06700.2;AT1G06700.1;AT3G59350.2;AT2G30740.1;AT2G43230.1;AT3G59350.3;AT3G59350.1;AT2G43230.2	Protein kinase superfamily protein ; Protein kinase superfamily protein ; Protein kinase superfamily protein ; Protein kinase superfamily protein ; Protein kinase superfamily protein ; Protein kinase superfamily protein ; Protein kinase superfamily protei	28.768	3;2;2;2;2;2;2;2;2;1;1;1;1;1;1;1;1;1;1;1	2;1;1;1;1;1;1;1;1;0;0;0;0;0;0;0;0;0;0;0	0	57654000	60596000	47292000	53729000	55980000	0	0	61233000	71670000	0	50141000	0	61696000	0	71279000	0	61564000	0	38269000
AT2G42210.4;AT2G42210.3;AT2G42210.1;AT2G42210.2	Mitochondrial import inner membrane translocase subunit Tim17/Tim22/Tim23 family protein ; Mitochondrial import inner membrane translocase subunit Tim17/Tim22/Tim23 family protein ; Mitochondrial import inner membrane translocase subunit Tim17/Tim22/Tim23	11.421	2;2;2;2	2;2;2;2	0	0	0	0	0	0	0	51417000	88392000	72823000	66572000	89524000	62289000	0	0	52829000	60817000	43061000	0	79403000
AT2G42230.1;AT2G42230.2	C-CAP/cofactor C-like domain-containing protein ; C-CAP/cofactor C-like domain-containing protein	3.8472	2;2	2;2	0	0	0	0	0	0	0	0	0	111490000	0	0	108710000	68706000	0	0	93255000	0	0	0
AT3G57785.1;AT2G42310.1	unknown protein; BEST Arabidopsis thaliana protein match is: unknown protein (TAIR:AT2G42310.1); Has 121 Blast hits to 121 proteins in 51 species: Archae - 0; Bacteria - 0; Metazoa - 4; Fungi - 48; Plants - 67; Viruses - 0; Other Eukaryotes - 2 (source: N	6.273	1;1	1;1	0	0	0	0	0	0	0	0	0	0	0	0	0	0	0	0	0	0	0	42777000
AT2G42320.2;AT2G42320.1	nucleolar protein gar2-related ; nucleolar protein gar2-related	2.0597	1;1	1;1	0	0	0	0	0	0	0	0	0	0	0	0	0	0	0	0	0	0	0	0
AT2G42490.1	Copper amine oxidase family protein	49.28	5	5	107980000	90498000	73015000	0	75919000	62746000	181430000	76083000	60055000	120620000	107940000	64802000	91676000	0	107710000	109540000	0	0	0	0
AT3G58500.1;AT2G42500.1;AT2G42500.2	protein phosphatase 2A-4 ; protein phosphatase 2A-3 ; protein phosphatase 2A-3	139.76	7;7;5;2;1;1	6;6;4;1;0;0	408340000	479580000	506890000	386840000	426300000	321390000	526450000	264560000	397600000	612260000	273470000	401200000	477000000	654320000	356620000	465740000	477170000	537550000	276340000	435660000
AT2G42520.1	P-loop containing nucleoside triphosphate hydrolases superfamily protein	19.218	8	4	73929000	64150000	62876000	86181000	88321000	66883000	70716000	69118000	0	0	0	67214000	68015000	101590000	82479000	75005000	59804000	0	0	89818000
AT2G42590.2;AT2G42590.1;AT2G42590.3	general regulatory factor 9 ; general regulatory factor 9 ; general regulatory factor 9	164.79	4;4;4	3;3;3	102990000	83654000	86306000	0	0	0	149680000	0	90909000	99794000	131330000	103380000	86135000	96221000	113040000	0	119170000	119240000	173070000	100790000
AT2G42600.2;AT2G42600.1	phosphoenolpyruvate carboxylase 2 ; phosphoenolpyruvate carboxylase 2	-2	12;12	1;1	0	0	0	0	0	0	0	0	0	0	0	0	0	0	11714000	0	0	0	0	0
AT2G42680.1	multiprotein bridging factor 1A	66.003	6	3	186230000	232630000	280080000	220340000	256030000	269840000	437900000	248960000	264420000	268950000	241230000	190040000	222710000	205940000	216380000	234850000	261800000	269900000	0	0
AT2G42700.1;AT2G42700.2	FUNCTIONS IN: molecular_function unknown; INVOLVED IN: vesicle-mediated transport, vesicle docking involved in exocytosis; LOCATED IN: cellular_component unknown; EXPRESSED IN: 22 plant structures; EXPRESSED DURING: 14 growth stages; CONTAINS InterPro DOM	2.053	1;1	1;1	0	0	0	0	0	0	0	0	0	0	0	0	0	0	0	0	0	9070100	0	0
AT2G42710.1	Ribosomal protein L1p/L10e family	18.706	5	5	119310000	200060000	146160000	109060000	66592000	138760000	21529000	318010000	337880000	95996000	167450000	227550000	311930000	35932000	103080000	104670000	118060000	154810000	0	141710000
AT5G45775.1;AT5G45775.2;AT4G18730.1;AT3G58700.1;AT2G42740.1	Ribosomal L5P family protein ; Ribosomal L5P family protein ; ribosomal protein L16B ; Ribosomal L5P family protein ; ribosomal protein large subunit 16A	56.836	8;8;8;8;8	8;8;8;8;8	3955200000	3836800000	4086400000	2677200000	5072000000	2759200000	6964700000	3310300000	3104400000	3279000000	4323200000	3532800000	2771100000	6677500000	4051600000	2703100000	4898900000	2704100000	3709600000	2481200000
AT2G42790.1	citrate synthase 3	5.3637	6;1	4;1	0	0	14898000	0	0	0	15390000	0	21710000	0	0	0	0	0	17892000	0	0	0	0	0
AT2G42810.1;AT2G42810.2	protein phosphatase 5.2 ; protein phosphatase 5.2	12.796	5;5	5;5	83261000	99895000	0	0	88377000	0	0	69709000	0	0	0	113550000	99705000	0	0	238110000	0	0	0	118710000
AT2G42910.1	Phosphoribosyltransferase family protein	100.49	10	10	666760000	671860000	659840000	641690000	586020000	465440000	723450000	491460000	698360000	762700000	576340000	625380000	676720000	892930000	430540000	529350000	507250000	617620000	517740000	690170000
AT2G43090.1;AT2G43090.2	Aconitase/3-isopropylmalate dehydratase protein ; Aconitase/3-isopropylmalate dehydratase protein	168.38	8;6;2	7;6;1	533090000	549200000	472120000	504480000	527820000	818790000	556460000	587420000	519540000	510220000	509130000	562090000	604240000	631620000	599450000	595030000	601360000	648760000	629300000	629260000
AT2G43160.3;AT2G43160.2;AT2G43160.1;AT2G43160.4	ENTH/VHS family protein ; ENTH/VHS family protein ; ENTH/VHS family protein ; ENTH/VHS family protein	7.5166	2;2;2;1	2;2;2;1	0	85493000	0	0	0	0	0	0	0	0	0	0	0	0	0	0	0	0	0	0
AT2G43350.2;AT2G43350.1	glutathione peroxidase 3 ; glutathione peroxidase 3	2.6041	1;1	1;1	0	0	0	0	0	0	0	0	0	0	0	0	0	0	0	0	0	26126000	0	0
AT2G43360.1	Radical SAM superfamily protein	23.545	3	3	0	0	0	0	0	0	0	0	0	0	0	0	0	0	0	99889000	0	0	0	0
AT3G59540.1;AT2G43460.1	Ribosomal L38e protein family ; Ribosomal L38e protein family	11.531	1;1	1;1	0	0	0	0	0	0	0	0	0	0	0	0	0	0	0	0	0	0	0	476410000
AT2G43610.1	Chitinase family protein	85.673	10	10	669390000	521990000	418820000	379790000	589250000	663070000	478440000	450500000	379420000	876250000	428460000	468950000	427530000	374730000	390930000	600570000	443190000	579110000	561410000	543350000
AT2G43640.3;AT2G43640.2;AT2G43640.1	Signal recognition particle, SRP9/SRP14 subunit ; Signal recognition particle, SRP9/SRP14 subunit ; Signal recognition particle, SRP9/SRP14 subunit	15.114	1;1;1	1;1;1	0	0	0	0	0	0	0	0	0	0	0	0	0	0	0	0	0	0	0	14180000
AT2G43650.1	Sas10/U3 ribonucleoprotein (Utp) family protein	12.663	1	1	0	0	0	0	0	0	0	0	0	0	0	0	0	0	0	0	0	6592500	0	0
AT2G43710.2;AT2G43710.1	Plant stearoyl-acyl-carrier-protein desaturase family protein ; Plant stearoyl-acyl-carrier-protein desaturase family protein	19.672	7;7;1	5;5;0	228550000	203730000	239940000	0	0	167830000	268800000	154880000	238860000	216940000	185850000	213270000	253220000	259360000	167300000	220170000	319790000	230610000	125130000	230450000
AT2G43750.2;AT2G43750.1	O-acetylserine (thiol) lyase B ; O-acetylserine (thiol) lyase B	26.257	6;6	4;4	222340000	253320000	202090000	177430000	288260000	141810000	386590000	188200000	92535000	133140000	156540000	233020000	310590000	364680000	181840000	312250000	177620000	144770000	133990000	228860000
AT2G43770.1	Transducin/WD40 repeat-like superfamily protein	3.113	2	2	0	0	0	0	0	0	0	0	0	0	0	0	0	0	0	0	0	50431000	0	0
AT2G43790.1	MAP kinase 6	34.344	7;1;1;1;1;1	6;1;1;0;1;1	109770000	154110000	109060000	122440000	131010000	96075000	0	88748000	97739000	205930000	66072000	128730000	167650000	195470000	87809000	94811000	60190000	209760000	186120000	122390000
AT2G43820.1	UDP-glucosyltransferase 74F2	12.56	1	1	0	0	0	0	0	0	0	0	0	0	0	0	0	0	0	0	0	4725000	0	0
AT2G43910.1;AT2G43910.2;AT2G43910.3	HARMLESS TO OZONE LAYER 1 ; HARMLESS TO OZONE LAYER 1 ; HARMLESS TO OZONE LAYER 1	20.469	4;4;2	4;4;2	154270000	156400000	161280000	0	180660000	139900000	221620000	139970000	170000000	169820000	164630000	195670000	146510000	160480000	176750000	213450000	132470000	136810000	145310000	0
AT2G43940.1	S-adenosyl-L-methionine-dependent methyltransferases superfamily protein	4.4522	2	2	0	0	0	0	0	0	0	0	0	0	0	0	0	0	0	23325000	0	0	0	0
AT2G43950.3;AT2G43950.2;AT2G43950.1	chloroplast outer envelope protein 37 ; chloroplast outer envelope protein 37 ; chloroplast outer envelope protein 37	5.1472	1;1;1	1;1;1	0	0	0	0	0	0	0	0	0	0	0	0	0	0	0	0	0	0	15002000	0
AT2G43970.2;AT2G43970.1	RNA-binding protein ; RNA-binding protein	2.3085	2;2	2;2	0	0	0	0	0	0	0	0	0	0	0	0	0	0	0	0	0	0	0	19836000
AT2G44060.2;AT2G44060.1	Late embryogenesis abundant protein, group 2 ; Late embryogenesis abundant protein, group 2	67.778	11;11	11;11	1813800000	2141000000	1958000000	1867200000	2764100000	2326800000	3409200000	1996300000	2028300000	2080400000	2043700000	1858600000	1529200000	2908800000	2785400000	2773500000	2382500000	2157400000	2653900000	1899900000
AT2G44065.2;AT2G44065.1	Ribosomal protein L2 family ; Ribosomal protein L2 family	3.357	1;1	1;1	0	0	0	0	0	0	0	0	0	0	0	0	0	0	0	0	0	0	0	7753800
AT2G44100.2;AT2G44100.1	guanosine nucleotide diphosphate dissociation inhibitor 1 ; guanosine nucleotide diphosphate dissociation inhibitor 1	113.8	12;12;4	7;7;2	505690000	490820000	368540000	533930000	564960000	413440000	672400000	332360000	487390000	458830000	488140000	441790000	359380000	692050000	480350000	442580000	436160000	449620000	349620000	497240000
AT2G44120.1;AT2G44120.2	Ribosomal protein L30/L7 family protein ; Ribosomal protein L30/L7 family protein	99.629	8;8	2;2	1179600000	836480000	1054400000	1776400000	2289800000	2313200000	1121000000	1388200000	1044700000	997830000	1378300000	1421000000	1035700000	2717000000	2744600000	1554800000	1876600000	1586600000	741750000	1437300000
AT2G44140.2;AT2G44140.1	Peptidase family C54 protein ; Peptidase family C54 protein	2.273	1;1	1;1	0	0	0	0	0	0	0	0	0	0	0	0	0	0	0	0	0	0	0	1672700
AT2G44160.1	methylenetetrahydrofolate reductase 2	204.39	20	16	872920000	713090000	689730000	701940000	902600000	682240000	1247200000	653130000	704570000	660700000	613650000	682960000	572130000	1076400000	799710000	781280000	800640000	552150000	616880000	877550000
AT2G44310.1	Calcium-binding EF-hand family protein	10.154	1	1	0	0	0	0	0	0	0	0	0	0	0	0	0	0	0	0	5649600	0	0	0
AT2G44350.1;AT2G44350.2	Citrate synthase family protein ; Citrate synthase family protein	232.19	15;15;3	15;15;3	1071300000	1170600000	1303800000	1256900000	1232900000	814840000	1586900000	910900000	1071700000	875400000	1527300000	1111800000	1161200000	1634800000	1308400000	1521700000	1111700000	1038200000	1224100000	950010000
AT2G44510.1	CDK inhibitor P21 binding protein	7.5779	1	1	0	0	0	0	0	0	0	0	0	0	0	0	0	0	0	0	0	0	0	4941700
AT2G44530.2;AT2G44530.1	Phosphoribosyltransferase family protein ; Phosphoribosyltransferase family protein	25.573	2;2	2;2	0	14215000	12346000	15965000	15683000	0	0	0	0	0	0	0	0	0	0	14144000	0	14919000	0	17140000
AT2G44610.1	Ras-related small GTP-binding family protein	15.655	5;1	2;0	283150000	240320000	0	205430000	1117600000	926800000	426240000	699710000	431600000	181740000	425690000	0	274660000	550030000	691100000	652290000	954670000	237970000	280410000	349170000
AT2G44790.1	uclacyanin 2	123.29	3	3	169440000	260660000	178520000	62673000	8614100	93403000	2606300	348500000	385760000	271360000	615030000	633880000	307440000	7548300	44451000	25783000	0	44134000	0	390620000
AT2G45030.1	Translation elongation factor EFG/EF2 protein	82.067	7	2	216550000	155000000	195730000	300290000	219340000	124880000	268300000	203860000	124610000	81787000	148660000	192080000	175420000	360350000	201690000	212410000	233370000	128790000	107460000	160750000
AT2G45060.1	Uncharacterised conserved protein UCP022280	63.4	3	3	0	0	77934000	77073000	75026000	108700000	66242000	77679000	0	87910000	81903000	71180000	81476000	122130000	79218000	40714000	0	0	0	0
AT2G45140.1	plant VAP homolog 12	28.343	4	4	270140000	157640000	227350000	309220000	0	182970000	27435000	138230000	143060000	174750000	133370000	203750000	159260000	143190000	110250000	60879000	130570000	363050000	109740000	144040000
AT2G45200.2;AT2G45200.1	golgi snare 12 ; golgi snare 12	8.58	3;2	3;2	0	0	0	786480000	0	0	0	0	0	0	0	0	130630000	0	0	0	0	0	0	348590000
AT2G45220.1	Plant invertase/pectin methylesterase inhibitor superfamily	81.464	5	5	185620000	175300000	67143000	155960000	103240000	181190000	99075000	81432000	207100000	195070000	108560000	181620000	186570000	86956000	91927000	0	125990000	159110000	166260000	173580000
AT2G45240.1	methionine aminopeptidase 1A	2.9284	3	3	0	0	0	0	0	0	0	0	56735000	0	0	0	0	0	85817000	0	83415000	0	0	0
AT2G45290.1	Transketolase	31.768	10	5	180720000	106870000	0	210270000	328750000	220140000	266450000	189940000	183510000	142190000	179010000	184200000	177900000	315590000	266100000	245740000	283780000	226430000	155350000	239830000
AT2G45300.1	RNA 3-terminal phosphate cyclase/enolpyruvate transferase, alpha/beta	10.99	7	1	0	0	0	0	0	0	0	0	0	0	0	0	0	0	0	0	0	0	0	86751000
AT2G45330.2;AT2G45330.1	RNA 2-phosphotransferase, Tpt1 / KptA family ; RNA 2-phosphotransferase, Tpt1 / KptA family	9.509	1;1	1;1	0	0	0	0	0	0	0	0	0	0	0	0	0	0	0	0	0	19322000	0	0
AT2G45430.1	AT-hook motif nuclear-localized protein 22	23.126	1	1	46906000	49133000	38516000	46000000	0	61113000	0	55384000	79764000	53812000	0	69892000	62428000	0	0	14474000	0	47016000	0	58406000
AT2G45470.1	FASCICLIN-like arabinogalactan protein 8	209.24	6	5	368160000	217290000	330840000	397720000	296520000	245100000	333370000	261670000	295770000	306390000	304340000	311110000	435280000	389120000	239240000	266750000	213460000	362760000	119000000	310970000
AT2G45540.1;AT2G45540.2	WD-40 repeat family protein / beige-related ; WD-40 repeat family protein / beige-related	9.4347	3;3	3;3	0	0	0	0	0	0	0	0	0	0	58842000	0	0	0	0	0	0	0	0	0
AT2G45710.1;AT3G61110.1	Zinc-binding ribosomal protein family protein ; ribosomal protein S27	48.576	3;3;1	1;1;1	0	0	0	0	0	0	0	0	0	0	0	0	0	0	0	0	0	0	0	71226000
AT2G45730.1	eukaryotic initiation factor 3 gamma subunit family protein	3.4281	1	1	0	0	0	0	0	0	0	0	0	0	0	0	0	0	0	0	0	0	0	9277900
AT2G45790.1	phosphomannomutase	183.83	8	8	825390000	1275100000	1047500000	882630000	802180000	1189400000	736810000	1012500000	1257400000	1172300000	947820000	1034700000	1015900000	726000000	807110000	708490000	920380000	1155900000	1540100000	865400000
AT2G45810.1	DEA(D/H)-box RNA helicase family protein	13.73	6	2	0	0	0	0	0	0	0	0	0	0	0	0	0	0	0	0	0	0	0	18356000
AT2G45820.1	Remorin family protein	6.0305	2	2	75232000	43981000	51157000	0	0	0	0	0	57970000	0	57270000	0	0	36781000	63487000	0	167270000	0	0	0
AT2G45960.2;AT2G45960.1;AT2G45960.3	plasma membrane intrinsic protein 1B ; plasma membrane intrinsic protein 1B ; plasma membrane intrinsic protein 1B	100.76	6;6;6	3;3;3	390680000	302410000	337590000	272600000	461970000	391320000	397790000	517910000	306470000	469120000	419210000	378180000	494600000	389350000	289230000	632880000	284680000	378860000	403060000	448160000
AT2G46140.1	Late embryogenesis abundant protein	110.74	3	3	212270000	224720000	169270000	255890000	229940000	101870000	200900000	110940000	263130000	162860000	190650000	161000000	141960000	281720000	148260000	244580000	231290000	148670000	259760000	156680000
AT2G46170.2;AT2G46170.1	Reticulon family protein ; Reticulon family protein	56.127	4;4;1	4;4;1	63196000	57417000	30773000	90923000	13348000	88848000	35794000	0	0	102880000	0	165730000	129830000	0	0	0	58029000	79648000	77719000	0
AT2G46280.2;AT2G46280.1;AT2G46280.3	TGF-beta receptor interacting protein 1 ; TGF-beta receptor interacting protein 1 ; TGF-beta receptor interacting protein 1	177.31	11;11;7;3	11;11;7;3	1002200000	841810000	958460000	968920000	1520700000	1336700000	1244600000	1314800000	875640000	609740000	846990000	689580000	789000000	1391000000	1163000000	1161900000	1377700000	1079200000	799510000	993630000
AT2G46370.3;AT2G46370.2;AT2G46370.1;AT2G46370.4	Auxin-responsive GH3 family protein ; Auxin-responsive GH3 family protein ; Auxin-responsive GH3 family protein ; Auxin-responsive GH3 family protein	9.0058	4;4;4;4	4;4;4;4	54750000	55524000	52686000	0	68963000	75028000	57750000	54892000	33398000	58980000	0	72831000	62523000	77463000	68528000	56955000	0	64465000	0	60321000
AT2G46470.1	inner membrane protein OXA1-like	2.3184	1	1	0	0	0	0	0	0	0	0	0	0	0	0	0	0	0	39132000	0	0	0	0
AT2G46520.1	cellular apoptosis susceptibility protein, putative / importin-alpha re-exporter, putative	230.8	13	13	338150000	296140000	300650000	311460000	253470000	212630000	336560000	200730000	285280000	323940000	304090000	254360000	299710000	400920000	237420000	214550000	225860000	325610000	210110000	300310000
AT2G46860.1	pyrophosphorylase 3	68.459	4	2	62788000	101300000	67049000	93605000	69073000	45626000	38412000	39477000	72296000	164170000	42591000	78185000	109110000	95583000	56626000	114340000	33226000	135150000	102520000	97766000
AT2G46900.1	CONTAINS InterPro DOMAIN/s: Basic helix-loop-helix, Nulp1-type (InterPro:IPR006994); Has 2929 Blast hits to 2464 proteins in 333 species: Archae - 2; Bacteria - 151; Metazoa - 913; Fungi - 372; Plants - 141; Viruses - 47; Other Eukaryotes - 1303 (source:	2.2577	2	2	0	0	0	0	0	0	0	0	0	0	0	49761000	0	0	0	0	0	0	0	0
AT2G47000.1	ATP binding cassette subfamily B4	76.458	7;3;3;3;2;2;2	4;1;1;1;0;1;1	275970000	347160000	330290000	180690000	152430000	118030000	412780000	207850000	192640000	196810000	185490000	244620000	202550000	329080000	166630000	268140000	240720000	128590000	262270000	131670000
AT3G62250.1;AT2G47110.2;AT2G47110.1;AT3G52590.1;AT2G36170.1;AT4G05050.4;AT1G23410.1;AT4G05050.3;AT4G05050.2;AT4G05050.1;AT4G02890.2;AT4G02890.1;AT1G55060.1;AT4G05320.5;AT4G02890.4;AT4G02890.3;AT5G03240.3;AT5G03240.2;AT5G03240.1;AT1G65350.1;AT5G37640.1;AT4G05320.6;AT4G05320.3;AT4G05320.1;AT5G20620.1;AT4G05320.4;AT4G05320.2	ubiquitin 5 ; ubiquitin 6 ; ubiquitin 6 ; ubiquitin extension protein 1 ; Ubiquitin supergroup;Ribosomal protein L40e ; ubiquitin 11 ; Ribosomal protein S27a / Ubiquitin family protein ; ubiquitin 11 ; ubiquitin 11 ; ubiquitin 11 ; Ubiquitin family protei	130.68	5;5;5;3;3;3;3;3;3;3;3;3;3;3;3;3;3;3;3;3;3;3;3;3;3;3;3;2	2;2;2;0;0;0;0;0;0;0;0;0;0;0;0;0;0;0;0;0;0;0;0;0;0;0;0;0	2706400000	2450800000	2504100000	2026400000	5884900000	4843900000	6179700000	6754400000	3525200000	2786100000	3708400000	3426900000	3019500000	2452400000	4803500000	5614300000	3931500000	3315100000	3674300000	2560300000
AT2G47140.1	NAD(P)-binding Rossmann-fold superfamily protein	6.977	1	1	0	10441000	0	11453000	0	0	0	0	0	0	0	0	0	0	0	0	0	0	0	0
AT2G47250.1	RNA helicase family protein	3.1956	1	1	0	0	0	0	0	0	0	0	0	0	0	0	0	0	0	0	12310000	0	0	0
AT2G47330.1	P-loop containing nucleoside triphosphate hydrolases superfamily protein	1.7682	1	1	0	0	0	0	0	0	0	0	0	0	0	0	0	0	0	0	0	0	0	9478900
AT2G47390.1	Prolyl oligopeptidase family protein	94.484	7	7	148460000	145490000	142420000	169630000	138560000	97536000	211820000	93627000	138950000	309390000	150930000	127390000	141170000	171480000	116770000	113640000	0	173260000	142110000	113690000
AT2G47470.3;AT2G47470.1;AT2G47470.4;AT2G47470.2	thioredoxin family protein ; thioredoxin family protein ; thioredoxin family protein ; thioredoxin family protein	180.82	12;12;11;9	12;12;11;9	1311500000	1370300000	1786900000	1569000000	1754000000	943520000	1911400000	1239800000	1318300000	1368700000	1800400000	1483500000	1490300000	2113200000	1359900000	1321800000	1835800000	1182300000	1318300000	1194100000
AT2G47510.2;AT2G47510.1	fumarase 1 ; fumarase 1	275.99	11;11;4;4;3	11;11;4;4;3	566830000	690450000	634080000	589220000	822020000	676450000	918620000	631360000	663500000	666290000	691330000	654600000	669960000	1124400000	712090000	895650000	950590000	620390000	452990000	773720000
AT2G47610.1	Ribosomal protein L7Ae/L30e/S12e/Gadd45 family protein	4.5572	8	1	0	0	0	0	0	0	0	0	0	0	0	0	0	0	0	0	0	0	0	432710000
AT3G62840.2;AT2G47640.3;AT2G47640.2;AT3G62840.1;AT2G47640.4;AT2G47640.1	Small nuclear ribonucleoprotein family protein ; Small nuclear ribonucleoprotein family protein ; Small nuclear ribonucleoprotein family protein ; Small nuclear ribonucleoprotein family protein ; Small nuclear ribonucleoprotein family protein ; Small nucl	47.545	2;2;2;2;2;2	2;2;2;2;2;2	0	0	0	0	0	0	0	0	0	0	0	0	0	0	0	0	0	0	286600000	0
AT2G47650.1;AT2G47650.2	UDP-xylose synthase 4 ; UDP-xylose synthase 4	167.25	13;12	3;2	507450000	612290000	811880000	820290000	835610000	719000000	885680000	626340000	925290000	1099600000	749740000	659130000	700880000	1018500000	693300000	584410000	625860000	619750000	588190000	479030000
AT2G47710.1	Adenine nucleotide alpha hydrolases-like superfamily protein	2.7343	1	1	0	0	0	0	0	0	0	0	0	0	0	0	0	0	0	0	0	0	0	24935000
AT2G47730.1	glutathione S-transferase phi 8	323.31	9	8	3940800000	6234000000	7730000000	7150500000	5669300000	4379600000	9312300000	4916500000	5541200000	5024500000	10048000000	6617600000	6012700000	9608800000	6992600000	4943800000	7902300000	3681000000	5513000000	3025500000
AT2G47840.1	Uncharacterised conserved protein ycf60	6.7037	2	2	0	17435000	0	0	0	0	0	0	0	0	0	0	0	0	0	0	0	0	0	18196000
AT2G47960.1	unknown protein; CONTAINS InterPro DOMAIN/s: Protein of unknown function DUF974 (InterPro:IPR010378); Has 285 Blast hits to 284 proteins in 126 species: Archae - 0; Bacteria - 0; Metazoa - 150; Fungi - 68; Plants - 32; Viruses - 0; Other Eukaryotes - 35 (	31.076	3	3	29568000	27720000	27994000	27442000	36366000	34973000	32922000	33085000	0	0	0	30843000	32114000	0	31437000	34525000	32193000	0	0	32321000
AT2G47970.1;AT2G47970.2	Nuclear pore localisation protein NPL4 ; Nuclear pore localisation protein NPL4	15.275	5;4	5;4	46734000	0	56530000	0	63952000	0	0	0	0	59961000	0	52668000	64719000	0	0	65491000	0	0	0	0
AT2G47990.1	transducin family protein / WD-40 repeat family protein	2.1105	1	1	0	0	0	0	0	0	0	0	0	0	0	0	0	0	0	0	0	0	0	18392000
AT3G01120.1	Pyridoxal phosphate (PLP)-dependent transferases superfamily protein	156.49	11	11	411670000	288490000	473200000	494150000	553420000	492100000	621870000	467650000	483170000	369370000	515780000	442720000	512610000	635010000	415930000	434910000	531810000	378920000	337150000	339470000
AT3G01130.2;AT3G01130.1	unknown protein; FUNCTIONS IN: molecular_function unknown; INVOLVED IN: biological_process unknown; EXPRESSED IN: male gametophyte, pollen tube; EXPRESSED DURING: M germinated pollen stage; BEST Arabidopsis thaliana protein match is: unknown protein (TAIR	5.1104	1;1	1;1	0	0	0	0	0	0	0	0	0	0	0	0	0	0	0	0	0	68753000	0	0
AT3G01150.2;AT3G01150.1	polypyrimidine tract-binding protein 1 ; polypyrimidine tract-binding protein 1	5.4372	1;1	1;1	0	0	0	0	0	0	0	0	0	0	0	0	0	0	0	0	0	13385000	0	0
AT3G01190.1	Peroxidase superfamily protein	72.001	8	8	570440000	295820000	401450000	444860000	460010000	277270000	461600000	305410000	347850000	375210000	272230000	312370000	381890000	661200000	349270000	326030000	443070000	311250000	324580000	344260000
AT3G01280.1	voltage dependent anion channel 1	316.98	12	10	1911400000	1468800000	2231600000	1743500000	2294600000	1614400000	2734500000	1591400000	1679300000	1709900000	1846600000	1363000000	1519800000	3276800000	1904100000	1551500000	2282300000	1429600000	1459800000	1859500000
AT3G01290.1	SPFH/Band 7/PHB domain-containing membrane-associated protein family	8.8244	1	1	14292000	19903000	12762000	14307000	12807000	5500500	14729000	8603000	12577000	19418000	13668000	13951000	13859000	15584000	9564500	11928000	0	13887000	12058000	22353000
AT3G01310.2;AT3G01310.1;AT5G15070.1;AT5G15070.2	Phosphoglycerate mutase-like family protein ; Phosphoglycerate mutase-like family protein ; Phosphoglycerate mutase-like family protein ; Phosphoglycerate mutase-like family protein	15.974	2;2;1;1	2;2;1;1	0	0	0	0	0	0	0	0	0	0	0	0	0	0	0	0	0	34018000	0	0
AT3G01340.2;AT3G01340.1	Transducin/WD40 repeat-like superfamily protein ; Transducin/WD40 repeat-like superfamily protein	11.441	3;3	2;2	63774000	91012000	50325000	52823000	0	182430000	182460000	0	0	0	0	0	0	0	64797000	0	0	179320000	140700000	0
AT3G01390.2;AT3G01390.1	vacuolar membrane ATPase 10 ; vacuolar membrane ATPase 10	61.141	2;2	2;2	186540000	356520000	138140000	314750000	68653000	313540000	56661000	611440000	338760000	311870000	636950000	151090000	94173000	60910000	551440000	71325000	0	138120000	840170000	0
AT3G01420.1	Peroxidase superfamily protein	131.13	10	10	114990000	246390000	456210000	105650000	200970000	94268000	815690000	404440000	281320000	265950000	725640000	435290000	239280000	287780000	569350000	381380000	149420000	115780000	200250000	233530000
AT3G01520.1	Adenine nucleotide alpha hydrolases-like superfamily protein	2.2666	1	1	0	0	0	0	0	0	0	0	0	0	0	0	0	0	0	0	0	0	31001000	0
AT3G01540.1;AT3G01540.4;AT3G01540.3;AT3G01540.2	DEAD box RNA helicase 1 ; DEAD box RNA helicase 1 ; DEAD box RNA helicase 1 ; DEAD box RNA helicase 1	20.701	5;5;5;5;2;2;1	5;5;5;5;2;2;1	71653000	88842000	108580000	0	0	145010000	90655000	94648000	64486000	94059000	59877000	74454000	93325000	72279000	73168000	92228000	0	105410000	0	0
AT3G01590.2;AT3G01590.1	Galactose mutarotase-like superfamily protein ; Galactose mutarotase-like superfamily protein	13.203	3;3	3;3	0	0	0	0	0	31608000	0	0	0	0	0	0	0	0	0	0	0	41170000	0	0
AT3G01640.1;AT5G14470.1	glucuronokinase G ; GHMP kinase family protein	52.864	2;1	2;1	50227000	46013000	37773000	40321000	43338000	28289000	44330000	25114000	49873000	65279000	53862000	40112000	46651000	47882000	42070000	43432000	34687000	52091000	40642000	38492000
AT3G01780.1	ARM repeat superfamily protein	14.696	4	4	70676000	52059000	54465000	78811000	0	52806000	0	0	59982000	77532000	0	29869000	78649000	75933000	48296000	57006000	87143000	70569000	43057000	0
AT3G01910.1;AT3G01910.2	sulfite oxidase ; sulfite oxidase	7.7063	3;2	3;2	0	0	0	0	0	0	217220000	99813000	0	0	0	0	46952000	0	103600000	0	0	0	0	0
AT3G01980.4;AT3G01980.1;AT3G01980.3	NAD(P)-binding Rossmann-fold superfamily protein ; NAD(P)-binding Rossmann-fold superfamily protein ; NAD(P)-binding Rossmann-fold superfamily protein	2.3252	1;1;1	1;1;1	0	0	0	0	0	0	0	0	0	0	0	0	0	0	2870200	0	0	0	0	0
AT3G02080.1;AT5G15520.1	Ribosomal protein S19e family protein ; Ribosomal protein S19e family protein	62.247	5;3	3;1	1338400000	1044500000	1996800000	766690000	1112500000	468190000	2112000000	593370000	643640000	1116700000	1411400000	992240000	1066500000	3178800000	1568800000	1219000000	2322600000	1195500000	1074900000	2275400000
AT3G02090.1;AT3G02090.2	Insulinase (Peptidase family M16) protein ; Insulinase (Peptidase family M16) protein	323.31	18;17	18;17	2752900000	2376800000	2625600000	2569700000	3600900000	2694500000	3248700000	2836000000	2655700000	2236800000	2520800000	2582800000	2752100000	4222800000	2746000000	2730400000	3452700000	3368700000	2367300000	2445200000
AT3G02200.2;AT3G02200.1	Proteasome component (PCI) domain protein ; Proteasome component (PCI) domain protein	185.83	8;7	8;7	396420000	397020000	516880000	510400000	425980000	389370000	549620000	334050000	395760000	431870000	382080000	373820000	404470000	702070000	342540000	343340000	497850000	434720000	382870000	419230000
AT3G02230.1	reversibly glycosylated polypeptide 1	323.31	23	9	1866400000	2093700000	2025200000	1806000000	1587500000	1270300000	2483100000	1436900000	2469200000	2510300000	2096000000	1857800000	2028200000	2603800000	1822800000	1881000000	1689600000	1892100000	1702400000	1726300000
AT3G02260.1	auxin transport protein (BIG)	62.175	10	10	120180000	89175000	89299000	115550000	86673000	82006000	90160000	75048000	113070000	121140000	102920000	99201000	124910000	117530000	79367000	100280000	84882000	122030000	38008000	111140000
AT3G02320.1	N2,N2-dimethylguanosine tRNA methyltransferase	27.102	2	1	0	0	0	0	0	0	0	0	0	0	0	0	0	0	0	0	0	0	0	13071000
AT3G02350.1	galacturonosyltransferase 9	3.5711	2	1	0	0	0	0	0	0	0	0	0	0	0	0	0	0	0	10374000	0	0	0	0
AT3G02360.2;AT3G02360.1	6-phosphogluconate dehydrogenase family protein ; 6-phosphogluconate dehydrogenase family protein	209.7	15;15	13;13	1203000000	1288600000	1142400000	841010000	1581900000	892010000	2132900000	1257100000	972690000	894510000	1268600000	1117100000	1074100000	1624300000	1092700000	1543200000	1203700000	1011100000	883170000	863970000
AT3G02420.1	unknown protein; FUNCTIONS IN: molecular_function unknown; INVOLVED IN: biological_process unknown; LOCATED IN: membrane; EXPRESSED IN: 25 plant structures; EXPRESSED DURING: 15 growth stages; CONTAINS InterPro DOMAIN/s: Uncharacterised protein family UPF	195.67	5	5	180030000	176460000	195220000	106800000	166280000	52994000	30154000	230460000	396640000	176990000	155300000	192110000	182040000	53258000	135350000	95600000	127310000	69624000	76222000	132720000
AT3G02480.1	Late embryogenesis abundant protein (LEA) family protein	6.4225	1	1	0	0	0	0	0	0	0	0	0	0	0	0	0	0	0	0	11703000	0	0	0
AT3G02520.1	general regulatory factor 7	323.31	12	4	2069400000	1854100000	1743600000	1642600000	2765800000	2473600000	2847900000	2287800000	1883500000	1254900000	2067300000	2237000000	1925000000	2596500000	2459700000	2381300000	1812500000	1933600000	2434900000	1744200000
AT3G02530.1	TCP-1/cpn60 chaperonin family protein	323.31	21	6	1890300000	1579900000	1856300000	1826500000	1820000000	1612300000	1853000000	1558600000	1817900000	1783800000	1445700000	1787500000	1868800000	2401800000	1481800000	1349200000	1672200000	1989400000	1540000000	2106300000
AT3G02540.3;AT3G02540.1;AT3G02540.2	Rad23 UV excision repair protein family ; Rad23 UV excision repair protein family ; Rad23 UV excision repair protein family	43.099	4;4;3	4;4;3	29932000	28977000	43996000	0	0	73303000	0	82579000	45134000	23504000	58702000	33344000	38867000	6925300	31471000	17381000	53898000	20158000	181980000	44621000
AT3G02560.2;AT3G02560.1	Ribosomal protein S7e family protein ; Ribosomal protein S7e family protein	290.55	4;4	3;3	650610000	517910000	572200000	747740000	586010000	427360000	804830000	465290000	669530000	675390000	571320000	590970000	647660000	875880000	511060000	549000000	661750000	485790000	326880000	574180000
AT3G02580.1	sterol 1	42.856	1	1	0	0	0	0	0	26113000	0	104100000	0	0	31619000	0	0	0	0	0	0	0	0	0
AT3G02630.1	Plant stearoyl-acyl-carrier-protein desaturase family protein	42.935	8	4	268760000	233020000	292030000	297770000	311080000	246870000	272080000	248360000	266930000	295700000	287790000	256400000	275930000	353140000	208900000	255120000	206140000	249880000	226370000	185450000
AT3G02650.1	Tetratricopeptide repeat (TPR)-like superfamily protein	65.665	4	4	64802000	54095000	50532000	57856000	59781000	0	96202000	0	0	0	72512000	0	0	51709000	0	0	0	78976000	0	0
AT3G02710.1	ARM repeat superfamily protein	33.561	1	1	0	0	0	0	0	0	0	0	0	0	0	0	0	0	0	0	0	0	0	6508100
AT3G02720.1	Class I glutamine amidotransferase-like superfamily protein	5.0056	2	2	0	0	0	0	0	0	0	0	0	0	0	0	0	45059000	0	0	0	0	0	0
AT3G02760.1	Class II aaRS and biotin synthetases superfamily protein	163.17	6	6	144790000	138060000	175720000	188500000	161130000	135810000	165790000	128270000	0	176980000	182000000	138180000	208020000	148620000	133750000	84622000	176550000	142540000	80444000	134200000
AT3G02780.1	isopentenyl pyrophosphate:dimethylallyl pyrophosphate isomerase 2	162.7	8	6	734120000	837320000	796080000	920040000	906780000	860040000	946680000	744880000	1061900000	964120000	911280000	679040000	918490000	1015300000	966900000	944400000	893990000	754990000	820900000	584910000
AT3G02870.2;AT3G02870.1;AT3G02870.3	Inositol monophosphatase family protein ; Inositol monophosphatase family protein ; Inositol monophosphatase family protein	32.976	3;3;2	3;3;2	21557000	22897000	20805000	23791000	20516000	19807000	0	16123000	0	22803000	0	0	0	24865000	19174000	0	0	0	17960000	39457000
AT3G02880.1	Leucine-rich repeat protein kinase family protein	33.543	7	5	139750000	126020000	138380000	183130000	141740000	103690000	109220000	119430000	161780000	170270000	142020000	149630000	131930000	149010000	120790000	132560000	120450000	145700000	138420000	189810000
AT3G02950.1	Tho complex subunit 7/Mft1p	2.1826	1	1	0	0	0	0	0	0	0	0	0	0	0	0	0	0	0	0	0	0	0	5453700
AT3G03050.1	cellulose synthase-like D3	72.36	5	4	78071000	99060000	88727000	82303000	25867000	107290000	18339000	78382000	107720000	86151000	64095000	81078000	85883000	39309000	45662000	69313000	0	205940000	114760000	109640000
AT3G03060.1;AT4G36580.1;AT2G18330.1;AT5G16930.1	P-loop containing nucleoside triphosphate hydrolases superfamily protein ; AAA-type ATPase family protein ; AAA-type ATPase family protein ; AAA-type ATPase family protein	22.548	2;1;1;1	2;1;1;1	36348000	48476000	35707000	0	0	27078000	0	49124000	0	31206000	0	0	0	0	0	0	0	30830000	43776000	0
AT3G03070.1	NADH-ubiquinone oxidoreductase-related	38.284	1	1	0	0	0	0	0	0	0	0	0	0	0	0	0	0	0	0	0	16876000	0	0
AT3G03100.2;AT3G03100.1	NADH:ubiquinone oxidoreductase, 17.2kDa subunit ; NADH:ubiquinone oxidoreductase, 17.2kDa subunit	5.8405	2;2	2;2	0	0	0	0	0	0	0	112910000	0	0	0	0	0	0	0	0	0	0	0	0
AT3G03110.1	exportin 1B	1.9317	4	2	0	0	0	0	0	0	0	0	0	0	0	0	0	0	0	0	0	11263000	0	0
AT3G03160.1	FUNCTIONS IN: molecular_function unknown; INVOLVED IN: intracellular protein transport; LOCATED IN: endomembrane system, integral to membrane, endoplasmic reticulum; EXPRESSED IN: 23 plant structures; EXPRESSED DURING: 15 growth stages; CONTAINS InterPro	-2	1	1	0	0	0	0	0	0	0	0	0	0	0	0	0	0	0	0	16200000	0	0	0
AT3G03250.1	UDP-GLUCOSE PYROPHOSPHORYLASE 1	323.31	21	8	3304800000	3861400000	2673000000	2335600000	3593600000	3161600000	5587500000	3348800000	4064400000	3429900000	3383600000	3042800000	3197000000	4214800000	3789300000	4142800000	3744600000	3113600000	3708700000	3052400000
AT3G03270.2;AT3G03270.1	Adenine nucleotide alpha hydrolases-like superfamily protein ; Adenine nucleotide alpha hydrolases-like superfamily protein	47.903	2;2	2;2	68742000	60418000	0	103560000	92774000	63173000	83715000	49460000	64992000	78349000	84318000	63130000	51725000	0	54823000	53451000	63902000	86794000	0	38260000
AT3G03310.1	lecithin:cholesterol acyltransferase 3	2.914	2	2	345400000	0	0	0	0	0	0	0	0	0	0	0	0	0	0	315870000	0	314380000	0	0
AT3G03320.1	RNA-binding ASCH domain protein	3.4926	1	1	0	0	0	0	0	0	0	0	0	0	0	0	0	0	0	0	0	0	36950000	0
AT3G03380.1	DegP protease 7	3.9235	1	1	0	0	0	0	0	0	0	0	0	0	0	0	0	0	0	0	0	0	22904000	0
AT3G03490.1	peroxin 19-1	1.8615	1	1	0	0	0	0	0	0	0	0	0	0	0	1445400	0	0	0	0	0	0	0	0
AT3G03500.1	TatD related DNase	4.1353	2	2	0	0	0	0	0	0	0	0	0	0	0	0	0	0	0	0	0	0	39410000	0
AT3G03520.1	non-specific phospholipase C3	2.3397	1	1	0	0	0	0	0	0	0	0	0	0	0	0	0	0	0	0	0	0	0	31609000
AT3G03600.1	ribosomal protein S2	15.146	2	2	0	0	0	36349000	0	0	0	0	0	0	29387000	0	0	0	0	34806000	0	0	0	0
AT3G03610.1	ELMO/CED-12 family protein	3.8873	2	2	0	0	0	0	0	0	0	0	0	0	0	16542000	0	0	0	0	0	0	0	0
AT3G03640.1	beta glucosidase 25	1.9964	2	2	0	0	0	0	0	0	0	0	0	0	0	0	0	0	0	0	0	87682000	0	0
AT3G03780.3;AT3G03780.2;AT3G03780.1	methionine synthase 2 ; methionine synthase 2 ; methionine synthase 2	277.42	29;29;29	11;11;11	4508600000	5023900000	5307100000	3981600000	4665500000	2704500000	5977000000	2928000000	4154300000	5154700000	5303900000	4978100000	5044500000	6592400000	4455700000	4530800000	4073300000	3196400000	3560900000	4049200000
AT3G03900.1	adenosine-5-phosphosulfate (APS) kinase 3	4.6739	1	1	0	0	0	0	0	0	0	0	0	0	0	0	0	0	0	0	0	0	7573600	0
AT3G03920.1	H/ACA ribonucleoprotein complex, subunit Gar1/Naf1 protein	33.162	3;1	3;1	107950000	157180000	151720000	376420000	248380000	228250000	286320000	231820000	122740000	101200000	130990000	198500000	267620000	300810000	250060000	146860000	249390000	185000000	0	126160000
AT3G03960.1	TCP-1/cpn60 chaperonin family protein	323.31	22	22	2230600000	1819300000	1918500000	1941100000	2715000000	2659500000	2416500000	2254600000	1317800000	1413600000	1559200000	1660400000	1664500000	2904900000	2287500000	2206200000	1975600000	2062800000	1740100000	1983700000
AT3G03980.1	NAD(P)-binding Rossmann-fold superfamily protein	1.6155	1	1	0	0	0	0	0	0	0	0	0	0	0	0	0	0	0	8984500	0	0	0	0
AT3G04010.1	O-Glycosyl hydrolases family 17 protein	13.229	1	1	0	0	0	0	0	0	0	0	0	0	0	0	0	0	0	0	0	0	0	6538000
AT3G04080.1	apyrase 1	9.3789	2	2	64081000	0	0	0	0	0	0	32184000	0	52513000	41814000	0	0	0	0	0	0	0	0	0
AT3G04120.1	glyceraldehyde-3-phosphate dehydrogenase C subunit 1	323.31	15	2	10785000000	14763000000	15971000000	10774000000	11153000000	7487800000	20223000000	9316700000	12524000000	12740000000	15704000000	10376000000	10357000000	21664000000	12710000000	9869500000	10915000000	12027000000	14497000000	8191500000
AT3G04400.2;AT3G04400.1;AT2G33370.1;AT1G04480.1	Ribosomal protein L14p/L23e family protein ; Ribosomal protein L14p/L23e family protein ; Ribosomal protein L14p/L23e family protein ; Ribosomal protein L14p/L23e family protein	135.48	6;5;5;5	6;5;5;5	428780000	310720000	288390000	539980000	603810000	516450000	660650000	286980000	268860000	245910000	315410000	414370000	384640000	683030000	418500000	526730000	621680000	684750000	301340000	369810000
AT3G04480.1	endoribonucleases	75.416	2	2	31432000	35253000	35745000	48682000	38500000	22829000	37551000	23455000	40770000	40156000	50367000	0	41111000	0	29672000	36106000	38943000	31832000	0	37620000
AT3G04490.1	unknown protein; BEST Arabidopsis thaliana protein match is: unknown protein (TAIR:AT4G38092.1); Has 75 Blast hits to 64 proteins in 20 species: Archae - 0; Bacteria - 0; Metazoa - 36; Fungi - 0; Plants - 22; Viruses - 0; Other Eukaryotes - 17 (source: NC	6.7124	1	1	0	0	0	0	0	0	0	0	0	0	0	0	0	0	0	0	0	0	0	15901000
AT3G04500.1	RNA-binding (RRM/RBD/RNP motifs) family protein	3.7481	1	1	0	0	0	0	0	0	0	0	0	0	0	0	0	0	0	0	0	0	0	12763000
AT3G04570.1	AT-hook motif nuclear-localized protein 19	7.069	1	1	0	0	0	0	0	0	0	0	0	0	0	0	0	0	0	0	0	0	0	72992000
AT3G04600.3;AT3G04600.2;AT3G04600.1	Nucleotidylyl transferase superfamily protein ; Nucleotidylyl transferase superfamily protein ; Nucleotidylyl transferase superfamily protein	13.299	4;4;4	4;4;4	104280000	56981000	63466000	112310000	130510000	52543000	139240000	0	84286000	0	102820000	0	140350000	0	77847000	108920000	84862000	90081000	74954000	83999000
AT3G04610.1	RNA-binding KH domain-containing protein	15.232	5	5	133050000	106820000	88192000	71975000	274650000	74791000	248020000	147260000	107010000	109170000	121200000	171660000	212380000	86807000	140260000	269300000	245090000	140730000	82244000	0
AT3G04710.1;AT3G04710.3;AT3G04710.2	ankyrin repeat family protein ; ankyrin repeat family protein ; ankyrin repeat family protein	89.127	5;5;4	5;5;4	161390000	128760000	162840000	130200000	100050000	197950000	57733000	111240000	148560000	185780000	78300000	228420000	225350000	173190000	101120000	102610000	147780000	233070000	138300000	176470000
AT3G04730.1	indoleacetic acid-induced protein 16	1.7365	1	1	0	0	0	0	0	0	0	0	0	0	4588900	0	0	0	0	0	0	0	0	0
AT3G04780.1	Protein of unknown function (DUF1000)	89.017	2	2	0	0	0	0	0	0	0	0	0	0	0	0	0	0	0	0	116070000	0	0	0
AT3G04790.1	Ribose 5-phosphate isomerase, type A protein	9.8112	2	2	0	0	0	0	0	0	0	0	0	0	0	0	0	0	0	81388000	0	0	0	0
AT3G04830.2;AT3G04830.1	Protein prenylyltransferase superfamily protein ; Protein prenylyltransferase superfamily protein	13.85	4;4	4;4	0	0	0	0	76326000	0	164900000	0	0	0	0	0	112750000	0	0	0	0	0	0	0
AT3G04840.1	Ribosomal protein S3Ae	323.31	11	6	6234800000	4119200000	5108600000	4022300000	3516800000	2737900000	5465500000	4139300000	4342900000	4215700000	4762200000	3846000000	4439100000	6791600000	4277600000	3757400000	5931000000	4658500000	5391200000	3836200000
AT3G04880.1	DNA-damage-repair/toleration protein (DRT102)	3.9155	1	1	0	0	0	0	0	0	0	0	0	0	0	0	0	0	0	0	0	0	0	22365000
AT3G04920.1	Ribosomal protein S24e family protein	8.3943	2	1	0	0	0	0	0	0	0	0	0	0	0	0	0	0	0	0	0	0	0	824300000
AT3G04960.2;AT3G04960.4;AT3G04960.1;AT3G04960.3	Domain of unknown function (DUF3444) ; Domain of unknown function (DUF3444) ; Domain of unknown function (DUF3444) ; Domain of unknown function (DUF3444)	-2	1;1;1;1	1;1;1;1	0	0	0	0	0	0	0	0	0	0	0	0	0	0	0	0	0	17279000	0	0
AT3G05020.1	acyl carrier protein 1	126.3	1	1	591610000	664700000	555320000	601660000	577640000	540550000	540050000	454740000	796900000	812970000	612640000	630290000	609480000	600640000	520410000	575850000	431510000	626030000	0	0
AT3G05040.1	ARM repeat superfamily protein	3.3235	3	3	0	0	0	0	0	35940000	0	0	0	0	0	0	54468000	0	0	59795000	0	0	0	0
AT3G05050.1	Protein kinase superfamily protein	10.674	1	1	0	0	0	0	0	0	0	0	0	0	0	0	0	0	0	0	7021800	0	0	0
AT3G05060.1	NOP56-like pre RNA processing ribonucleoprotein	323.31	18	15	1436800000	1068600000	1625800000	1767500000	1326400000	1543600000	1563600000	1793300000	1357800000	965880000	1590900000	1357800000	1524100000	1427600000	1639600000	1143700000	1395500000	1743900000	678490000	1605800000
AT3G05090.2;AT3G05090.1	Transducin/WD40 repeat-like superfamily protein ; Transducin/WD40 repeat-like superfamily protein	2.6596	1;1	1;1	0	0	0	0	0	0	0	0	0	0	0	0	0	0	0	0	0	0	0	4045200
AT3G05190.1;AT5G27410.1;AT5G27410.2	D-aminoacid aminotransferase-like PLP-dependent enzymes superfamily protein ; D-aminoacid aminotransferase-like PLP-dependent enzymes superfamily protein ; D-aminoacid aminotransferase-like PLP-dependent enzymes superfamily protein	19.456	1;1;1	1;1;1	0	0	0	0	0	0	0	0	0	0	0	0	0	0	0	0	0	16417000	0	0
AT3G05230.1	Signal peptidase subunit	1.9085	1	1	0	0	0	0	0	0	0	0	0	0	0	0	0	0	30114000	0	0	0	0	0
AT3G05280.1	Integral membrane Yip1 family protein	2.4741	1	1	0	0	0	0	0	0	0	0	0	0	0	0	0	0	0	0	0	37800000	0	0
AT3G05420.1;AT3G05420.2	acyl-CoA binding protein 4 ; acyl-CoA binding protein 4	60.409	7;7	7;7	122100000	157080000	94339000	48792000	118890000	55938000	90319000	109740000	210760000	164210000	116820000	96649000	117120000	92192000	63391000	87198000	119900000	82171000	0	146790000
AT3G05530.1;AT1G09100.1	regulatory particle triple-A ATPase 5A ; 26S proteasome AAA-ATPase subunit RPT5B	175	15;10	14;9	779820000	896500000	1088800000	1032100000	1109000000	855640000	1381800000	1037800000	1013100000	770000000	1129600000	982000000	968110000	1506800000	1116200000	857580000	1194200000	1173200000	1106600000	835530000
AT3G05560.3;AT3G05560.2;AT3G05560.1	Ribosomal L22e protein family ; Ribosomal L22e protein family ; Ribosomal L22e protein family	4.8823	5;5;5	1;1;1	0	0	0	0	0	0	0	0	0	0	0	0	0	0	0	0	0	0	0	137180000
AT3G05580.1;AT1G64040.1	Calcineurin-like metallo-phosphoesterase superfamily protein ; type one serine/threonine protein phosphatase 3	4.7136	2;1	1;1	0	0	0	0	0	0	0	0	0	0	0	0	0	0	0	0	0	45409000	0	0
AT3G05590.1	ribosomal protein L18	51.841	5	1	922430000	1126800000	535370000	609550000	75762000	1308800000	1387900	1591300000	2082100000	686750000	1317600000	2172000000	1403100000	58699000	218850000	352080000	213210000	844880000	856930000	802120000
AT3G05680.1;AT3G05680.2	embryo defective 2016 ; embryo defective 2016	9.8714	2;2	2;2	0	0	0	0	0	0	0	0	0	0	0	10670000	0	0	0	0	0	0	0	14311000
AT3G05900.1	neurofilament protein-related	323.31	31	31	1502800000	1418000000	1392700000	1440900000	1424900000	1876600000	2033800000	1707500000	1563600000	1371400000	1758700000	1538300000	1537000000	426360000	1866400000	1556700000	1384800000	1751500000	2292800000	1942900000
AT3G05970.1	long-chain acyl-CoA synthetase 6	34.382	5	4	0	53020000	64745000	73858000	0	0	169320000	94987000	111090000	83804000	103130000	145070000	111910000	43669000	101650000	122560000	0	94713000	0	0
AT3G06035.1	Glycoprotein membrane precursor GPI-anchored	48.769	1	1	0	0	0	0	0	0	0	0	0	0	0	0	0	0	0	0	0	0	0	25836000
AT3G06050.1	peroxiredoxin IIF	49.983	4	4	327750000	393570000	365150000	305370000	510520000	468670000	566720000	381670000	305140000	387850000	352740000	340610000	319650000	544800000	352350000	502530000	521580000	352860000	320970000	400910000
AT3G06300.1	P4H isoform 2	91.559	6;1	6;1	257300000	288310000	278190000	267470000	217550000	303960000	281190000	256650000	257890000	286050000	227180000	246700000	258060000	285770000	221190000	157670000	212900000	273900000	230850000	253600000
AT3G06350.1	dehydroquinate dehydratase, putative / shikimate dehydrogenase, putative	94.386	5	5	137390000	0	0	135530000	123880000	0	144490000	88193000	105990000	0	114240000	106240000	0	179090000	95060000	108200000	125650000	0	71442000	0
AT3G06530.3;AT3G06530.1;AT3G06530.2	ARM repeat superfamily protein ; ARM repeat superfamily protein ; ARM repeat superfamily protein	76.688	12;12;12	12;12;12	137220000	88806000	169430000	146860000	119120000	114860000	117960000	104130000	110060000	103130000	91858000	116080000	158460000	190360000	85481000	85617000	64479000	181560000	55138000	173210000
AT3G06580.1	Mevalonate/galactokinase family protein	53.871	7	7	398980000	265140000	351640000	397220000	324110000	229180000	404840000	244860000	410040000	303190000	326000000	277600000	311890000	481200000	240890000	293010000	367290000	177500000	311970000	228020000
AT3G06610.1	DNA-binding enhancer protein-related	9.9286	2	2	0	0	0	0	0	0	0	0	0	0	0	0	0	0	0	0	0	80561000	0	0
AT3G06650.1	ATP-citrate lyase B-1	323.31	19	4	2272500000	2247500000	2294800000	2499500000	2468200000	1892900000	2644700000	1812300000	2414800000	2852700000	1842200000	2089600000	2379100000	3070800000	2235600000	2341600000	2457400000	2286400000	1809100000	2171400000
AT3G06670.1;AT3G06670.2	binding ; binding	8.1248	2;2	2;2	0	0	0	0	0	0	0	0	0	0	0	0	0	0	7480500	0	0	0	0	0
AT3G06720.2;AT3G06720.1	importin alpha isoform 1 ; importin alpha isoform 1	63.483	15;15	8;8	274490000	307780000	443560000	392090000	506350000	410030000	502090000	341720000	299670000	298730000	356330000	352630000	315680000	574670000	344980000	331790000	316040000	503450000	300090000	290940000
AT3G06790.2;AT3G06790.1	plastid developmental protein DAG, putative ; plastid developmental protein DAG, putative	3.0123	1;1	1;1	0	0	0	0	0	0	0	0	0	0	0	0	0	0	0	0	0	0	0	9064300
AT3G06810.1	acyl-CoA dehydrogenase-related	2.3261	1	1	0	0	0	0	0	0	0	0	0	0	0	0	0	0	0	0	0	0	0	10736000
AT3G06850.2;AT3G06850.1	2-oxoacid dehydrogenases acyltransferase family protein ; 2-oxoacid dehydrogenases acyltransferase family protein	13.08	1;1	1;1	0	0	0	0	0	0	0	0	0	0	0	0	0	0	0	0	0	0	0	15972000
AT3G06860.1	multifunctional protein 2	139.93	10	10	313790000	329250000	343420000	252790000	291200000	201870000	379690000	239000000	350540000	412710000	384600000	312550000	288940000	381360000	295070000	248440000	277710000	248270000	219580000	282780000
AT3G06930.1;AT3G06930.2	protein arginine methyltransferase 4B ; protein arginine methyltransferase 4B	3.2386	1;1	1;1	0	0	0	0	0	0	0	0	0	0	0	0	0	0	0	0	0	0	0	11253000
AT3G07020.2;AT3G07020.1	UDP-Glycosyltransferase superfamily protein ; UDP-Glycosyltransferase superfamily protein	5.4237	1;1	1;1	0	0	0	0	0	0	0	0	0	0	0	0	0	0	5888500	0	0	0	0	0
AT3G07050.1	GTP-binding family protein	10.219	3	3	124050000	50465000	225190000	149480000	0	0	91285000	0	0	0	0	153130000	0	0	0	0	0	0	0	0
AT3G07090.1	PPPDE putative thiol peptidase family protein	17.597	4	4	73280000	56716000	0	0	30320000	0	0	0	0	0	0	83897000	83600000	0	0	0	0	100060000	0	0
AT3G07100.1	Sec23/Sec24 protein transport family protein	53.191	9	9	277160000	223660000	269950000	376220000	308530000	120380000	325970000	245260000	302780000	223780000	329970000	187880000	178090000	286670000	219350000	230360000	275980000	197170000	224320000	239030000
AT3G07110.1;AT3G07110.2;AT4G13170.1	Ribosomal protein L13 family protein ; Ribosomal protein L13 family protein ; Ribosomal protein L13 family protein	13.516	6;6;4	3;3;1	563670000	460730000	0	432580000	745860000	0	687290000	0	541840000	447850000	342520000	513130000	522330000	853060000	761000000	818740000	738770000	632370000	261790000	557870000
AT3G07130.1	purple acid phosphatase 15	1.6515	1	1	0	0	0	0	0	0	0	0	0	0	0	0	0	0	0	0	0	0	0	568780000
AT3G07170.1	Sterile alpha motif (SAM) domain-containing protein	14.743	2	2	0	0	0	0	0	0	0	0	0	0	0	0	0	0	0	0	35280000	0	0	0
AT3G07320.1	O-Glycosyl hydrolases family 17 protein	13.197	1	1	0	0	0	0	0	0	0	0	0	0	0	0	0	0	0	0	0	0	29849000	0
AT3G07480.1	2Fe-2S ferredoxin-like superfamily protein	79.12	4	4	199520000	198840000	258540000	207460000	114720000	193950000	263330000	149160000	0	256350000	213290000	217540000	286450000	373890000	216850000	114300000	162430000	298510000	0	0
AT3G07570.1	Cytochrome b561/ferric reductase transmembrane with DOMON related domain	10.355	1	1	0	0	0	0	0	0	0	0	0	0	0	0	0	0	0	0	0	9733000	0	0
AT3G07640.1	unknown protein; Has 27 Blast hits to 27 proteins in 10 species: Archae - 0; Bacteria - 0; Metazoa - 0; Fungi - 0; Plants - 27; Viruses - 0; Other Eukaryotes - 0 (source: NCBI BLink).	30.627	2	2	26299000	27622000	26731000	30132000	23625000	22090000	0	17452000	23666000	42381000	18126000	0	33254000	37069000	0	23226000	0	47777000	0	0
AT3G07660.1	Kinase-related protein of unknown function (DUF1296)	12.535	3	3	38956000	52074000	44667000	0	0	36815000	0	149100000	72600000	54866000	113100000	0	0	0	0	0	95303000	54826000	110300000	0
AT3G07680.1	emp24/gp25L/p24 family/GOLD family protein	86.627	4	4	67773000	58833000	85565000	66936000	0	98571000	0	143630000	0	0	52275000	0	0	365960000	0	0	97113000	0	100070000	0
AT3G07720.1	Galactose oxidase/kelch repeat superfamily protein	12.108	3	3	0	0	0	0	0	56056000	16544000	38979000	171650000	70180000	0	0	63379000	0	0	94465000	0	0	0	0
AT3G07770.1	HEAT SHOCK PROTEIN 89.1	316.23	23	16	656210000	536460000	657570000	761690000	684410000	902140000	568450000	681610000	690150000	578930000	632460000	710290000	795830000	878360000	530640000	553040000	644910000	766690000	498650000	733840000
AT3G07810.1;AT3G07810.2	RNA-binding (RRM/RBD/RNP motifs) family protein ; RNA-binding (RRM/RBD/RNP motifs) family protein	15.311	4;4	4;4	0	0	93358000	88669000	0	0	0	92086000	127490000	0	133480000	0	0	0	129840000	119920000	0	103060000	127900000	0
AT3G07830.1	Pectin lyase-like superfamily protein	-2	1	1	0	0	0	0	0	0	0	0	0	0	0	0	0	0	0	0	0	0	0	201610000
AT3G07880.1	Immunoglobulin E-set superfamily protein	3.3885	1	1	0	0	0	0	0	0	0	0	0	0	0	0	0	0	0	0	0	0	32502000	0
AT3G07950.1	rhomboid protein-related	19.693	3	3	42825000	36734000	34345000	40495000	46663000	0	41585000	39528000	40623000	0	0	35916000	42192000	33956000	40255000	37662000	32771000	50478000	0	37927000
AT3G08030.2;AT3G08030.1	Protein of unknown function, DUF642 ; Protein of unknown function, DUF642	115.43	11;11	11;11	738340000	716940000	547170000	546030000	453800000	313480000	466330000	383630000	707100000	1006200000	463220000	488890000	512220000	717160000	393860000	513720000	481880000	516750000	553520000	459780000
AT3G08530.1	Clathrin, heavy chain	119.23	60	9	575300000	517280000	544340000	652350000	512400000	495290000	672510000	518520000	654440000	456020000	576210000	476200000	498980000	689410000	504130000	394340000	515960000	452120000	345570000	593640000
AT3G08580.2;AT3G08580.1	ADP/ATP carrier 1 ; ADP/ATP carrier 1	303.86	10;10	6;6	5019600000	5249700000	5734000000	4904400000	4790600000	3249100000	5571500000	3553300000	4667000000	6291400000	4526400000	3827100000	4220900000	6400000000	5273500000	4248800000	4918700000	4822500000	5737600000	4983200000
AT3G08590.2;AT3G08590.1	Phosphoglycerate mutase, 2,3-bisphosphoglycerate-independent ; Phosphoglycerate mutase, 2,3-bisphosphoglycerate-independent	323.31	22;22	14;14	609890000	741230000	747270000	586720000	700550000	507090000	835210000	462150000	621560000	839230000	618940000	523580000	640000000	824580000	528590000	408010000	795500000	677940000	617140000	544530000
AT3G08900.1	reversibly glycosylated polypeptide 3	4.7706	8;3	1;1	220570000	150140000	188660000	0	229520000	221980000	0	0	0	187590000	0	176870000	207990000	0	0	162080000	0	0	0	0
AT3G08943.1	ARM repeat superfamily protein	323.31	14	5	623410000	611700000	644270000	695830000	572510000	542530000	780060000	414330000	681520000	755520000	639940000	595810000	687580000	866120000	481110000	480460000	252640000	955180000	359880000	674190000
AT3G08947.1	ARM repeat superfamily protein	38.087	10	1	156800000	0	0	286110000	193200000	169560000	0	155560000	180470000	101470000	119130000	132530000	152330000	232690000	158460000	131130000	186030000	60707000	97671000	0
AT3G08960.1	ARM repeat superfamily protein	5.367	1	1	0	0	0	0	0	0	0	0	0	0	0	0	0	0	0	0	0	0	0	1312400
AT3G09200.1;AT3G09200.2	Ribosomal protein L10 family protein ; Ribosomal protein L10 family protein	323.31	9;8;3	3;3;0	6164000000	5643900000	6009900000	5169500000	5647500000	4004100000	5920700000	3576200000	5323000000	7187100000	4673100000	5462200000	5813700000	8323100000	4523800000	3833500000	4261700000	7193400000	4656100000	6268800000
AT3G09260.1	Glycosyl hydrolase superfamily protein	323.31	18	15	6543700000	10531000000	6892300000	5941500000	5574300000	4699900000	7290600000	5099300000	7693600000	8798200000	7652700000	5845700000	5536600000	9763900000	6395300000	7577700000	5624600000	4683900000	4901800000	5396400000
AT3G09270.1	glutathione S-transferase TAU 8	14.823	4	4	0	195490000	249510000	0	135890000	0	342020000	136510000	139740000	181280000	248850000	0	110530000	231190000	148880000	195260000	164320000	113180000	160670000	0
AT3G09300.1;AT5G02100.1	OSBP(oxysterol binding protein)-related protein 3B ; Oxysterol-binding family protein	54.969	6;3;1	6;3;1	156520000	150270000	192320000	200390000	217010000	166970000	183240000	152990000	209890000	159110000	195320000	186450000	133540000	262230000	164670000	114750000	185100000	157700000	149310000	213460000
AT3G09350.3;AT3G09350.2;AT3G09350.1	Fes1A ; Fes1A ; Fes1A	28.8	2;2;2	2;2;2	0	0	41729000	43955000	41827000	36174000	44834000	35330000	0	0	0	0	0	0	30943000	0	26441000	0	0	0
AT3G09440.2;AT3G09440.1	Heat shock protein 70 (Hsp 70) family protein ; Heat shock protein 70 (Hsp 70) family protein	323.31	25;25	11;11	1214600000	1013700000	1324100000	1184200000	1407700000	1184100000	1604100000	1121600000	1413700000	1126100000	1224900000	1192700000	1211200000	1641600000	1235500000	1190800000	1626600000	1308000000	843540000	1225600000
AT3G09500.1	Ribosomal L29 family protein	7.9132	3;1;1	2;1;1	0	630910000	707320000	0	999970000	1102900000	1037500000	1237900000	774490000	747120000	560880000	835130000	0	579510000	596440000	0	1149900000	789440000	1113500000	724760000
AT3G09630.2;AT3G09630.1	Ribosomal protein L4/L1 family ; Ribosomal protein L4/L1 family	323.31	13;13	4;4	4458800000	3727900000	3731000000	5265900000	8262800000	7287100000	9459100000	5914200000	4381300000	3115200000	4170400000	4363900000	4727200000	7304100000	5890600000	5884000000	8102900000	4270500000	4022100000	5390200000
AT5G02960.1;AT3G09680.1	Ribosomal protein S12/S23 family protein ; Ribosomal protein S12/S23 family protein	63.589	3;3	3;3	1679400000	1431300000	1507500000	1534800000	1395300000	1178300000	1505900000	1227600000	1741500000	1384100000	1448400000	1447800000	1456000000	1930000000	1230800000	706910000	1312900000	1804900000	1524100000	1709600000
AT3G09720.1	P-loop containing nucleoside triphosphate hydrolases superfamily protein	1.8614	1	1	0	0	0	0	0	0	0	0	0	0	0	0	0	0	0	0	0	0	11260000	0
AT3G09740.1	syntaxin of plants 71	4.6718	2	2	0	0	0	0	0	0	0	0	0	0	0	0	0	0	0	0	0	85492000	0	0
AT3G09810.1	isocitrate dehydrogenase VI	17.841	4	3	0	146930000	0	109960000	189700000	166110000	298130000	0	203680000	154960000	151450000	143760000	120670000	0	228990000	230000000	0	0	0	121670000
AT3G09820.1;AT3G09820.2	adenosine kinase 1 ; adenosine kinase 1	323.31	17;14	8;6	8253800000	9399400000	7258300000	8032100000	12089000000	9983200000	13927000000	9580300000	8141000000	8798200000	8509500000	8405200000	9312400000	9636900000	10446000000	12235000000	9153100000	9324500000	8858000000	8977200000
AT3G09840.1	cell division cycle 48	323.31	34	6	6491900000	6324100000	7092100000	6421700000	8211400000	6964400000	10168000000	6317900000	5361900000	5671100000	6397300000	5553200000	6242300000	9632700000	7147000000	7750400000	7409500000	6332700000	6501600000	5511700000
AT3G09940.2;AT3G09940.1	monodehydroascorbate reductase ; monodehydroascorbate reductase	41.042	6;6	6;6	307800000	225080000	217080000	328860000	310670000	131630000	280960000	188770000	125720000	182270000	175540000	169420000	230350000	344940000	209560000	243730000	261940000	190480000	218290000	196580000
AT3G10050.1	L-O-methylthreonine resistant 1	11.474	4	4	0	0	29893000	0	0	54192000	0	99037000	82837000	0	0	0	0	0	0	0	0	57236000	0	0
AT3G10220.1	tubulin folding cofactor B	9.8268	2	2	13270000	26762000	0	0	0	0	0	94239000	0	0	119750000	0	0	0	75580000	0	33134000	0	62138000	0
AT3G10260.2;AT3G10260.1;AT3G10260.3	Reticulon family protein ; Reticulon family protein ; Reticulon family protein	144.95	1;1;1	1;1;1	0	0	0	0	0	0	0	0	0	0	0	0	0	0	0	0	0	0	0	21656000
AT3G10330.1	Cyclin-like family protein	10.421	1	1	0	0	0	0	0	0	0	0	0	0	0	3444900	0	0	0	0	0	0	0	0
AT3G10370.1	FAD-dependent oxidoreductase family protein	29.755	3	3	0	0	0	0	0	0	0	0	0	0	0	0	0	0	32792000	0	0	0	0	0
AT3G10410.1	SERINE CARBOXYPEPTIDASE-LIKE 49	26.822	2	2	93214000	102480000	102460000	83339000	65798000	56727000	88958000	58875000	0	168610000	0	0	0	104460000	59315000	105830000	53618000	81356000	0	88253000
AT3G10530.1	Transducin/WD40 repeat-like superfamily protein	1.7791	2	2	0	0	0	0	0	65238000	0	0	0	0	0	0	0	0	0	0	0	0	0	0
AT3G10670.1	non-intrinsic ABC protein 7	10.111	1	1	0	0	0	0	0	0	0	0	0	0	0	0	0	0	0	0	0	3149300	0	0
AT3G10690.1	DNA GYRASE A	11.787	1	1	29688000	21317000	25624000	26839000	23521000	0	28000000	19399000	24113000	35901000	30951000	28456000	33719000	32933000	20411000	19536000	0	27821000	0	23750000
AT3G10740.1	alpha-L-arabinofuranosidase 1	7.2615	1	1	0	0	0	0	0	0	0	0	0	0	0	0	0	0	0	0	0	0	0	4216500
AT3G10850.1	Metallo-hydrolase/oxidoreductase superfamily protein	12.415	2	2	0	0	0	0	0	0	0	0	0	0	0	0	0	0	0	0	0	32605000	0	0
AT3G10860.1	Cytochrome b-c1 complex, subunit 8 protein	4.4298	2	1	0	0	0	0	0	0	0	0	0	0	0	0	0	0	0	0	0	0	0	6577400
AT3G10920.2;AT3G10920.1	manganese superoxide dismutase 1 ; manganese superoxide dismutase 1	172.89	5;5	5;5	470190000	868810000	789920000	716160000	939940000	775470000	914800000	599970000	600700000	925500000	859200000	975890000	919490000	1374900000	812750000	897320000	795750000	823330000	674020000	730020000
AT3G11130.1	Clathrin, heavy chain	323.31	66	15	6407400000	6218300000	6568400000	6963800000	7202300000	5758200000	8864600000	5919900000	7124800000	7563300000	6945900000	5990200000	6653000000	8526800000	6862500000	6674600000	7070500000	6436200000	5953700000	6181700000
AT3G11200.1;AT3G11200.2	alfin-like 2 ; alfin-like 2	38.865	2;1	2;1	0	0	104430000	0	0	0	27070000	0	112050000	0	0	93079000	0	68336000	0	0	0	108660000	108850000	103330000
AT3G11250.1	Ribosomal protein L10 family protein	47.623	8	2	0	0	0	0	365850000	0	115790000	117140000	142210000	356540000	129290000	327810000	233470000	362230000	0	267960000	182590000	295790000	0	222710000
AT3G11330.1	plant intracellular ras group-related LRR 9	319.02	9	9	529170000	539500000	503920000	483170000	418350000	353960000	561980000	348810000	478840000	605520000	550270000	424750000	457280000	547310000	360650000	419090000	365180000	451400000	530240000	563100000
AT3G11340.1	UDP-Glycosyltransferase superfamily protein	174.02	5	5	79540000	58950000	98532000	73455000	58457000	52313000	113890000	59600000	79118000	100130000	112030000	85783000	113950000	108750000	81149000	78779000	58049000	101680000	0	91195000
AT3G11400.1;AT3G11400.2	eukaryotic translation initiation factor 3G1 ; eukaryotic translation initiation factor 3G1	28.009	4;4	4;4	0	0	0	0	0	138330000	152060000	103750000	0	0	0	0	96215000	0	102680000	0	115210000	0	112920000	0
AT3G11450.1	DnaJ domain ;Myb-like DNA-binding domain	37.223	2	1	24302000	25794000	22676000	0	0	0	0	49871000	47096000	21074000	50696000	22211000	0	0	0	0	0	6915600	0	26661000
AT3G11510.1	Ribosomal protein S11 family protein	169.34	6	1	3970900000	3975300000	4611000000	4499000000	6239500000	7303700000	5689100000	5918000000	4082600000	3446700000	3941900000	4295100000	3950100000	5438500000	6386500000	5686100000	5409400000	7259500000	4841600000	5324000000
AT3G11630.1	Thioredoxin superfamily protein	168.87	8	3	521530000	455340000	469900000	419220000	500810000	510390000	565870000	333480000	387770000	466610000	368400000	372540000	411610000	659170000	362510000	510580000	457070000	374980000	310180000	479090000
AT3G11710.1	lysyl-tRNA synthetase 1	323.31	13	13	580760000	491920000	623340000	679050000	688510000	718730000	832080000	724600000	609820000	509850000	600280000	594870000	615280000	870000000	658820000	585750000	647300000	526820000	346450000	469730000
AT3G11730.1	Ras-related small GTP-binding family protein	9.9001	2	2	0	0	0	0	0	0	0	0	0	54228000	28263000	28828000	0	0	0	0	0	0	0	0
AT3G11780.1;AT3G11780.2	MD-2-related lipid recognition domain-containing protein / ML domain-containing protein ; MD-2-related lipid recognition domain-containing protein / ML domain-containing protein	21.173	2;2	2;2	106810000	148030000	105090000	0	0	0	55044000	129830000	174280000	127870000	184570000	143190000	90282000	75230000	145220000	143450000	93325000	101710000	181520000	111660000
AT3G11830.1;AT3G11830.2	TCP-1/cpn60 chaperonin family protein ; TCP-1/cpn60 chaperonin family protein	323.31	18;17	18;17	1908400000	1841600000	2221800000	1990600000	2646100000	2052900000	2174000000	1476500000	1511200000	1954400000	1530600000	1799800000	1898800000	3242900000	1751700000	1737900000	2150900000	2179000000	1582700000	2196400000
AT3G11910.2;AT3G11910.1	ubiquitin-specific protease 13 ; ubiquitin-specific protease 13	21.963	10;10	4;4	0	0	107860000	76915000	0	0	79256000	74867000	93904000	0	96808000	64887000	0	90686000	76441000	69851000	58840000	0	80826000	0
AT3G11940.2;AT3G11940.1	ribosomal protein 5A ; ribosomal protein 5A	193.49	12;12	2;2	0	0	0	0	0	0	0	0	0	0	0	0	0	0	0	0	0	1053600000	0	0
AT3G11950.2;AT3G11950.1	TRAF-like superfamily protein ; TRAF-like superfamily protein	7.582	1;1	1;1	0	18357000	0	0	0	0	0	25980000	31128000	13696000	18517000	0	0	0	0	0	0	0	0	0
AT3G11964.1	RNA binding;RNA binding	24.959	5	5	97809000	0	69003000	38863000	52935000	58847000	53730000	56359000	87277000	0	0	58525000	0	0	0	46411000	0	67967000	0	73920000
AT3G12050.1;AT3G12050.2	Aha1 domain-containing protein ; Aha1 domain-containing protein	29.632	4;3	4;3	206230000	143380000	182950000	188670000	297360000	213380000	284520000	175710000	122830000	153900000	0	184510000	188130000	289090000	190100000	144230000	160990000	269080000	125270000	179860000
AT3G12110.1	actin-11	15.126	13;1	2;0	331210000	290610000	255970000	295760000	336910000	299230000	451550000	283830000	131690000	293010000	284040000	0	0	0	403150000	271040000	312590000	316830000	261770000	315750000
AT3G12120.2;AT3G12120.1	fatty acid desaturase 2 ; fatty acid desaturase 2	62.042	4;4	4;4	78365000	0	118100000	106480000	129170000	143830000	69309000	96698000	84235000	0	71702000	86955000	86483000	128960000	82297000	55918000	62324000	112580000	0	0
AT3G12260.1	LYR family of Fe/S cluster biogenesis protein	28.507	3	3	124080000	105860000	134640000	154020000	195990000	155140000	167080000	194800000	115070000	134670000	140960000	114780000	105940000	156810000	182310000	127010000	131750000	190750000	136720000	186480000
AT3G12270.1	protein arginine methyltransferase 3	2.8843	2	2	0	0	0	0	0	0	0	0	0	0	0	0	0	0	0	55740000	0	0	0	0
AT3G12290.1	Amino acid dehydrogenase family protein	53.963	7	7	180850000	192730000	195560000	118800000	179520000	212500000	270770000	160750000	117380000	230490000	256870000	196200000	191500000	313140000	165900000	149420000	237340000	200800000	281440000	218350000
AT3G12370.1	Ribosomal protein L10 family protein	9.153	1	1	0	0	0	0	0	0	0	0	0	0	0	0	0	0	0	0	0	0	0	17437000
AT3G12390.1	Nascent polypeptide-associated complex (NAC), alpha subunit family protein	43.492	4	2	73896000	71916000	59131000	59874000	0	107260000	87537000	73377000	62396000	65952000	0	84274000	70685000	168360000	101100000	107820000	0	187630000	0	116430000
AT3G12490.1;AT3G12490.2	cystatin B ; cystatin B	116.6	6;5	6;5	280220000	193340000	229910000	226840000	318020000	285880000	238780000	345840000	389990000	294160000	299260000	258410000	321040000	415840000	261650000	210900000	291340000	221910000	680060000	220260000
AT3G12500.1	basic chitinase	7.1158	1	1	0	0	0	0	0	0	0	0	0	0	0	0	0	0	0	0	0	0	22831000	0
AT3G12580.1	heat shock protein 70	-2	15	1	0	0	0	0	0	312680000	0	0	0	0	0	0	0	0	0	0	0	0	0	0
AT3G12610.1	Leucine-rich repeat (LRR) family protein	1.6714	1	1	0	0	0	0	0	0	0	0	0	0	0	0	0	0	0	0	0	2154600	0	0
AT3G12670.1	CTP synthase family protein	18.42	5	5	106990000	35333000	106920000	59944000	118540000	105610000	41809000	56134000	83395000	61591000	61841000	83388000	125670000	125920000	81328000	52748000	61832000	77030000	70963000	39799000
AT3G12760.1	CONTAINS InterPro DOMAIN/s: Defective-in-cullin neddylation protein (InterPro:IPR014764), Protein of unknown function DUF298 (InterPro:IPR005176), UBA-like (InterPro:IPR009060); BEST Arabidopsis thaliana protein match is: Domain of unknown function (DUF29	23.88	3	3	0	0	0	46432000	0	0	0	0	0	0	0	0	57408000	0	0	0	0	0	0	0
AT3G12780.1	phosphoglycerate kinase 1	80.308	8	4	328720000	252060000	242600000	283230000	264560000	224030000	276860000	205800000	300110000	262320000	266590000	243710000	300390000	271930000	251490000	246750000	238200000	268940000	217150000	341260000
AT3G12800.1	short-chain dehydrogenase-reductase B	8.5537	2	2	0	0	0	0	0	0	0	0	0	0	78100000	0	79557000	0	105680000	96697000	0	0	0	0
AT3G12915.1;AT3G12915.2	Ribosomal protein S5/Elongation factor G/III/V family protein ; Ribosomal protein S5/Elongation factor G/III/V family protein	7.5951	16;12	2;1	0	0	0	0	0	0	0	105790000	81257000	0	0	0	0	0	108050000	0	0	0	0	0
AT3G13060.1;AT3G13060.2	evolutionarily conserved C-terminal region 5 ; evolutionarily conserved C-terminal region 5	11.442	2;2	2;2	0	0	0	0	0	0	0	0	0	0	0	0	0	0	0	0	0	0	0	165760000
AT3G13110.1	serine acetyltransferase 2;2	17.731	1	1	32974000	30008000	30307000	32363000	24705000	18581000	32857000	0	29636000	25558000	31762000	0	26559000	24829000	0	25490000	0	0	0	22615000
AT3G13160.1	Tetratricopeptide repeat (TPR)-like superfamily protein	74.43	10	10	301980000	320740000	360830000	351530000	470280000	251190000	326060000	217910000	318940000	356140000	287440000	373540000	371360000	563520000	304820000	351600000	486390000	388280000	171820000	402960000
AT3G13235.3;AT3G13235.2;AT3G13235.1	ubiquitin family protein ; ubiquitin family protein ; ubiquitin family protein	107.24	7;7;7	7;7;7	215470000	237420000	263010000	198830000	307240000	288750000	356510000	332380000	179520000	270650000	284690000	179770000	188380000	222540000	224790000	247450000	258630000	224790000	293260000	200290000
AT3G13290.1	varicose-related	14.077	6	2	0	0	0	0	0	0	0	0	0	0	0	0	0	0	0	0	0	0	0	15200000
AT3G13300.2;AT3G13300.1	Transducin/WD40 repeat-like superfamily protein ; Transducin/WD40 repeat-like superfamily protein	191.2	20;20	16;16	367340000	378270000	337950000	387660000	352870000	313520000	426210000	330120000	366900000	411600000	356850000	363210000	470720000	432430000	398510000	337070000	236140000	411960000	228960000	362130000
AT3G13330.1	proteasome activating protein 200	43.439	6	6	35241000	34738000	47606000	32529000	25085000	30214000	40529000	25905000	33794000	60886000	32263000	30768000	35158000	41336000	32498000	27790000	0	39353000	28457000	33916000
AT3G13410.1	unknown protein; FUNCTIONS IN: molecular_function unknown; INVOLVED IN: biological_process unknown; LOCATED IN: endoplasmic reticulum; EXPRESSED IN: 25 plant structures; EXPRESSED DURING: 15 growth stages; BEST Arabidopsis thaliana protein match is: unkno	3.9458	1	1	0	0	0	0	0	0	0	0	0	0	0	0	0	0	0	0	0	0	0	11394000
AT3G13460.1;AT3G13460.2;AT3G13460.4;AT3G13460.3	evolutionarily conserved C-terminal region 2 ; evolutionarily conserved C-terminal region 2 ; evolutionarily conserved C-terminal region 2 ; evolutionarily conserved C-terminal region 2	271.66	12;11;11;9	11;10;10;9	938650000	789750000	1030000000	1396600000	712340000	1522400000	52476000	1033400000	1552400000	855070000	807630000	1324300000	1157100000	257910000	574640000	653360000	694590000	1169000000	1043500000	1290500000
AT3G13470.1	TCP-1/cpn60 chaperonin family protein	3.3693	17	1	0	0	0	0	0	0	0	0	0	0	0	0	0	0	0	0	0	0	0	26051000
AT3G13490.1	Lysyl-tRNA synthetase, class II	3.4562	1	1	0	0	0	0	0	0	0	0	0	0	0	0	0	0	0	0	0	10198000	0	0
AT3G13570.1	SC35-like splicing factor 30A	12.636	1	1	0	0	0	0	0	0	0	0	0	0	0	0	0	0	0	0	0	0	5451200	0
AT3G13580.3;AT3G13580.2;AT3G13580.1	Ribosomal protein L30/L7 family protein ; Ribosomal protein L30/L7 family protein ; Ribosomal protein L30/L7 family protein	19.662	7;7;7	1;1;1	0	0	0	0	0	0	0	0	0	0	0	0	0	0	0	0	0	0	0	186430000
AT3G13610.1	2-oxoglutarate (2OG) and Fe(II)-dependent oxygenase superfamily protein	9.7217	4	4	0	232230000	311310000	641590000	155970000	267010000	329390000	344700000	0	0	0	298020000	0	334700000	250540000	267880000	156930000	161020000	89405000	212510000
AT3G13770.1	Pentatricopeptide repeat (PPR) superfamily protein	1.6069	1	1	0	0	0	0	0	0	0	0	0	0	0	0	0	0	0	0	0	0	0	7405900
AT3G13772.1	transmembrane nine 7	25.144	3;1	3;1	84053000	72906000	71666000	95319000	0	112100000	86471000	85284000	73777000	78213000	46325000	79268000	108250000	106460000	82646000	68054000	114190000	100550000	50815000	77774000
AT3G13790.2;AT3G13790.1	Glycosyl hydrolases family 32 protein ; Glycosyl hydrolases family 32 protein	88.802	8;8;1;1;1	8;8;1;1;1	327480000	412020000	292980000	311840000	470970000	577690000	240580000	400630000	331180000	603220000	257940000	280310000	294720000	402740000	379450000	540560000	392280000	348630000	442650000	339630000
AT3G13860.1	heat shock protein 60-3A	95.302	11	11	455150000	297830000	475070000	427880000	517950000	432030000	695830000	405210000	344970000	317860000	412550000	395380000	438380000	311530000	368520000	462180000	508060000	453610000	494460000	441330000
AT3G13870.1;AT3G13870.2	Root hair defective 3 GTP-binding protein (RHD3) ; Root hair defective 3 GTP-binding protein (RHD3)	119.31	16;15;5;1	16;15;5;1	364170000	362110000	414330000	422890000	709140000	566100000	573360000	458400000	387650000	377170000	538340000	410540000	453710000	959400000	484330000	544840000	404650000	407470000	358200000	698020000
AT3G13900.1	ATPase E1-E2 type family protein / haloacid dehalogenase-like hydrolase family protein	1.9231	1	1	0	0	0	0	0	0	0	0	0	0	0	0	0	0	0	56303000	0	0	0	0
AT3G13920.1;AT3G13920.4;AT3G13920.3;AT3G13920.2	eukaryotic translation initiation factor 4A1 ; eukaryotic translation initiation factor 4A1 ; eukaryotic translation initiation factor 4A1 ; eukaryotic translation initiation factor 4A1	113.13	19;18;17;17	3;3;1;3	177960000	339140000	286000000	215390000	391530000	684600000	363510000	259230000	317270000	370650000	330010000	342400000	450750000	361150000	265710000	239520000	328150000	494500000	482170000	233970000
AT3G13930.1	Dihydrolipoamide acetyltransferase, long form protein	133.85	12;2;2	12;2;2	597700000	626740000	855080000	787610000	1064000000	761230000	1032800000	703730000	609300000	759550000	806490000	748530000	650230000	1039900000	892230000	971590000	702610000	763660000	664580000	658120000
AT3G13990.2;AT3G13990.1	Kinase-related protein of unknown function (DUF1296) ; Kinase-related protein of unknown function (DUF1296)	90.608	2;2	2;2	38634000	0	34201000	0	0	0	0	0	0	0	0	51058000	0	0	0	0	0	0	0	0
AT3G14010.4;AT3G14010.3;AT3G14010.2;AT3G14010.1	CTC-interacting domain 4 ; CTC-interacting domain 4 ; CTC-interacting domain 4 ; CTC-interacting domain 4	4.894	2;2;2;2	2;2;2;2	0	0	23582000	0	0	29900000	0	40529000	39675000	0	28796000	24434000	0	0	14547000	0	0	54300000	26579000	16975000
AT3G14067.1	Subtilase family protein	45.609	2	2	0	132830000	51290000	0	0	44050000	0	45955000	113870000	0	60783000	42056000	52354000	0	0	0	43601000	0	83025000	68108000
AT3G14080.2;AT3G14080.1	Small nuclear ribonucleoprotein family protein ; Small nuclear ribonucleoprotein family protein	6.2252	1;1	1;1	0	0	0	0	0	0	0	0	0	0	0	0	14545000	0	0	0	0	0	0	0
AT3G14120.2;AT3G14120.3;AT3G14120.1	FUNCTIONS IN: molecular_function unknown; INVOLVED IN: transport; LOCATED IN: nuclear pore; EXPRESSED IN: 23 plant structures; EXPRESSED DURING: 13 growth stages; CONTAINS InterPro DOMAIN/s: Nuclear pore protein 84/107 (InterPro:IPR007252); Has 271 Blast	1.7991	2;2;2	2;2;2	0	0	0	0	0	0	0	0	0	0	0	0	0	0	0	0	0	0	0	233590000
AT3G14220.1	GDSL-like Lipase/Acylhydrolase superfamily protein	3.0068	1	1	0	0	0	0	0	0	0	0	0	0	0	0	0	0	0	0	0	7664800	0	0
AT3G14290.1	20S proteasome alpha subunit E2	20.855	9	2	129570000	112840000	174550000	0	0	61310000	129220000	102180000	97237000	140540000	119210000	122740000	179320000	223530000	86709000	162680000	195820000	91335000	109150000	49329000
AT3G14310.1	pectin methylesterase 3	112	8	7	857160000	849410000	656030000	748800000	671320000	878310000	454690000	780370000	813440000	775000000	856740000	761530000	680110000	277440000	738040000	754380000	637790000	1035500000	1160900000	693110000
AT3G14390.1	Pyridoxal-dependent decarboxylase family protein	135.22	10	2	664640000	615680000	691970000	446840000	384360000	528200000	933830000	739910000	541090000	464490000	583100000	463160000	767170000	522850000	557960000	773550000	735950000	439270000	649340000	787880000
AT3G14540.1	Terpenoid cyclases/Protein prenyltransferases superfamily protein	10.733	1	1	0	0	0	0	0	0	0	0	0	0	0	0	0	0	0	0	0	3418200	0	0
AT3G14600.1	Ribosomal protein L18ae/LX family protein	4.5983	3	1	0	0	0	0	0	0	0	0	0	0	0	0	0	0	263880000	0	0	0	0	0
AT3G14610.1	cytochrome P450, family 72, subfamily A, polypeptide 7	12.667	1	1	0	0	0	0	0	0	0	0	0	0	0	0	0	0	0	0	0	0	0	10175000
AT3G14690.1;AT3G14660.1	cytochrome P450, family 72, subfamily A, polypeptide 15 ; cytochrome P450, family 72, subfamily A, polypeptide 13	48.818	1;1	1;1	0	0	0	0	0	0	0	0	0	0	0	0	0	0	0	0	0	0	0	7087400
AT3G14790.1	rhamnose biosynthesis 3	30.643	14	3	239030000	447550000	181640000	169330000	270930000	285750000	276930000	217450000	158520000	149660000	83676000	211800000	188500000	217070000	197790000	307190000	220680000	198130000	220750000	189640000
AT3G14920.1	Peptide-N4-(N-acetyl-beta-glucosaminyl)asparagine amidase A protein	1.7817	1	1	0	0	0	0	0	0	0	0	0	0	0	0	0	0	0	0	0	0	0	14620000
AT3G14940.1	phosphoenolpyruvate carboxylase 3	323.31	35	15	948410000	1186000000	1172600000	1319200000	962380000	680760000	1228300000	775340000	1221800000	1440300000	1340000000	957450000	863750000	1275600000	1223700000	984790000	999970000	658970000	1077400000	852470000
AT3G14990.1;AT3G14990.3;AT3G14990.2	Class I glutamine amidotransferase-like superfamily protein ; Class I glutamine amidotransferase-like superfamily protein ; Class I glutamine amidotransferase-like superfamily protein	323.31	11;10;10	11;10;10	1156300000	1342100000	1879100000	1255300000	1241700000	781110000	2281800000	1251000000	1183100000	1560800000	1796600000	1599300000	1615300000	1920300000	1479100000	1008800000	892730000	1636900000	1006100000	1185000000
AT3G15000.1	cobalt ion binding	25.88	3;1;1	3;1;1	237640000	147450000	266290000	475900000	622460000	438350000	388100000	535060000	196280000	217580000	286350000	404090000	281140000	469810000	639100000	526440000	406530000	324740000	196230000	390540000
AT3G15010.2;AT3G15010.1	RNA-binding (RRM/RBD/RNP motifs) family protein ; RNA-binding (RRM/RBD/RNP motifs) family protein	66.034	4;4	4;4	122170000	0	146990000	0	52517000	0	36053000	0	73290000	100880000	0	69334000	0	72755000	0	0	0	0	56051000	70202000
AT3G15020.1;AT3G15020.2	Lactate/malate dehydrogenase family protein ; Lactate/malate dehydrogenase family protein	98.358	11;10	5;5	181390000	197470000	147240000	114470000	168380000	131680000	247050000	164430000	450700000	317100000	174810000	179120000	89442000	219180000	221270000	129540000	156080000	153530000	183290000	87611000
AT3G15160.1	unknown protein; Has 266 Blast hits to 264 proteins in 44 species: Archae - 0; Bacteria - 0; Metazoa - 58; Fungi - 0; Plants - 199; Viruses - 0; Other Eukaryotes - 9 (source: NCBI BLink).	1.7866	1	1	0	0	0	0	0	0	0	0	0	0	0	0	0	0	0	0	0	0	0	3254700
AT3G15180.1;AT3G15180.2	ARM repeat superfamily protein ; ARM repeat superfamily protein	80.161	4;4	4;4	45050000	46391000	50479000	53552000	51671000	37745000	40612000	38573000	46969000	73895000	69531000	49900000	59280000	67271000	49501000	47286000	0	60455000	0	60507000
AT3G15410.1;AT3G15410.2	Leucine-rich repeat (LRR) family protein ; Leucine-rich repeat (LRR) family protein	25.492	2;2	2;2	0	107090000	0	13420000	0	50276000	0	0	0	0	131380000	0	0	0	78140000	0	0	0	105760000	90430000
AT3G15640.2;AT3G15640.1	Rubredoxin-like superfamily protein ; Rubredoxin-like superfamily protein	24.518	4;4	3;3	0	92737000	131540000	57637000	41399000	135110000	0	156650000	258010000	78705000	94005000	363230000	309050000	40485000	71337000	109200000	75250000	89303000	72141000	106700000
AT3G15660.2;AT3G15660.1	glutaredoxin 4 ; glutaredoxin 4	18.128	2;2	2;2	142840000	0	0	0	0	141970000	0	0	0	0	0	105430000	0	0	118620000	104000000	0	0	0	0
AT3G15690.1;AT3G15690.2	Single hybrid motif superfamily protein ; Single hybrid motif superfamily protein	6.5023	2;2	2;2	0	0	0	0	0	0	0	0	0	0	0	0	0	0	0	0	0	0	20465000	0
AT3G15730.1	phospholipase D alpha 1	323.31	31	26	3061600000	3818000000	3041000000	3299700000	3524800000	2846300000	4060200000	2666100000	4202400000	3927500000	3432800000	2835800000	3143000000	4321600000	3025300000	3743300000	3568300000	2971900000	3487800000	2637700000
AT3G15830.1;AT3G15820.1	phosphatidic acid phosphatase-related / PAP2-related ; phosphatidic acid phosphatase-related / PAP2-related	2.4241	1;1	1;1	0	0	0	0	0	0	0	0	0	0	0	0	0	0	0	0	0	4970700	0	0
AT3G15950.1;AT3G15950.2	DNA topoisomerase-related ; DNA topoisomerase-related	323.31	23;22	23;22	2250200000	2781000000	2173100000	2074000000	1868800000	2994000000	3622500000	2539000000	2889800000	2852400000	2594600000	2309600000	2389000000	1590500000	2770000000	2798500000	2369500000	2346900000	4562100000	2598100000
AT3G15970.1	NUP50 (Nucleoporin 50 kDa) protein	5.1053	2	2	0	0	0	0	0	0	0	0	0	0	0	0	0	0	0	0	0	63771000	0	0
AT3G15980.1;AT3G15980.4;AT3G15980.3;AT3G15980.2;AT3G15980.5	Coatomer, beta subunit ; Coatomer, beta subunit ; Coatomer, beta subunit ; Coatomer, beta subunit ; Coatomer, beta subunit	37.047	20;20;20;20;18	6;6;6;6;5	149660000	158970000	139130000	0	0	233580000	287910000	178170000	0	169040000	159460000	157730000	160830000	30758000	160430000	224250000	0	286550000	161460000	179590000
AT3G16050.1	pyridoxine biosynthesis 1.2	14.669	3	3	45045000	0	0	0	0	0	32112000	0	28546000	82838000	42011000	40591000	50526000	49524000	0	0	37319000	0	0	0
AT3G16110.1	PDI-like 1-6	7.1235	2	2	48419000	46820000	49694000	0	46445000	31664000	52300000	0	28767000	0	54220000	0	43094000	0	0	45988000	0	0	0	0
AT3G16200.1	unknown protein; Has 97 Blast hits to 97 proteins in 15 species: Archae - 0; Bacteria - 8; Metazoa - 0; Fungi - 0; Plants - 36; Viruses - 0; Other Eukaryotes - 53 (source: NCBI BLink).	36.619	2	2	16279000	15376000	0	19516000	0	40002000	0	31496000	51180000	0	33091000	50947000	57307000	0	0	10403000	0	17321000	0	28000000
AT3G16240.1	delta tonoplast integral protein	20.328	2	2	24014000	34417000	17892000	0	0	0	0	0	29857000	65513000	0	15666000	0	0	0	33008000	0	16719000	0	0
AT3G16390.1	nitrile specifier protein 3	5.5571	5;2;2;2	2;0;0;0	0	37330000	0	0	0	0	0	0	0	80654000	0	0	0	0	0	0	0	0	0	0
AT3G16400.2;AT3G16400.1	nitrile specifier protein 1 ; nitrile specifier protein 1	2.7516	9;9	0;0	0	0	0	0	0	0	0	0	0	0	0	0	0	0	0	0	0	0	0	20337000
AT3G16410.1	nitrile specifier protein 4	256.06	18	10	1122300000	1694600000	1291700000	1419500000	1571700000	1264600000	1669500000	1190400000	1592200000	1493800000	1189500000	1308300000	1487800000	2066200000	1191400000	1732700000	1275600000	1474400000	1067500000	1200600000
AT3G16420.3;AT3G16420.2;AT3G16420.1	PYK10-binding protein 1 ; PYK10-binding protein 1 ; PYK10-binding protein 1	323.31	13;13;13;3;3	13;13;13;3;3	3304300000	4485600000	3707100000	3298700000	4219400000	3084800000	5227600000	4087900000	4670700000	4807200000	5107500000	3411200000	3605400000	4979500000	4217100000	4730500000	2699500000	3088000000	4606800000	2802500000
AT3G16440.1	myrosinase-binding protein-like protein-300B	17.142	2	2	0	65447000	0	80967000	77412000	0	44399000	72288000	53528000	50638000	0	58964000	60201000	0	0	0	75470000	80626000	58610000	0
AT3G16450.3;AT3G16450.2;AT3G16450.1	Mannose-binding lectin superfamily protein ; Mannose-binding lectin superfamily protein ; Mannose-binding lectin superfamily protein	6.5523	1;1;1	1;1;1	0	0	0	0	0	0	0	0	0	0	0	0	0	0	0	0	0	0	0	10862000
AT3G16460.2;AT3G16460.1	Mannose-binding lectin superfamily protein ; Mannose-binding lectin superfamily protein	323.31	23;23	23;23	3087700000	4721000000	3976000000	3454700000	3434500000	2202000000	4818500000	2635200000	3983800000	4559100000	4277800000	2951400000	3128500000	4811000000	3141400000	4185900000	4154600000	2872000000	5051400000	2885600000
AT3G16470.3;AT3G16470.2;AT3G16470.1	Mannose-binding lectin superfamily protein ; Mannose-binding lectin superfamily protein ; Mannose-binding lectin superfamily protein	3.1199	1;1;1	1;1;1	0	0	0	0	0	0	0	0	0	0	0	0	0	0	0	0	0	0	0	2709400
AT3G16480.1	mitochondrial processing peptidase alpha subunit	61.958	10	3	0	0	0	0	0	0	0	53485000	0	0	0	77940000	0	0	0	51193000	0	99274000	0	92493000
AT3G16640.1	translationally controlled tumor protein	173.35	7	7	2119800000	3039300000	2393400000	3316100000	1800800000	1874800000	2292300000	2180400000	3123800000	1997500000	1926000000	2401400000	2974500000	3189200000	1997800000	2340800000	2265400000	2735900000	2450300000	1806200000
AT3G16760.2;AT3G16760.1	Tetratricopeptide repeat (TPR)-like superfamily protein ; Tetratricopeptide repeat (TPR)-like superfamily protein	6.6789	1;1	1;1	0	0	0	0	0	0	0	0	0	0	0	0	0	0	0	0	34187000	0	0	0
AT3G16780.1	Ribosomal protein L19e family protein	47.303	3	2	211320000	150200000	163850000	173400000	433580000	378760000	587020000	332950000	176220000	160760000	231290000	182200000	183380000	168310000	375950000	416700000	244250000	297880000	226570000	270870000
AT3G16810.1	pumilio 24	65.413	7	7	84938000	68699000	106360000	116850000	92675000	94306000	99844000	96669000	84341000	49555000	88444000	86819000	99384000	115490000	72233000	63752000	76575000	123090000	40152000	97548000
AT3G16950.1;AT3G16950.2	lipoamide dehydrogenase 1 ; lipoamide dehydrogenase 1	84.173	6;6	3;3	174330000	179670000	184750000	59830000	23003000	72526000	0	171050000	220970000	160340000	298820000	206090000	199180000	56586000	107490000	28216000	119860000	64814000	283610000	95778000
AT3G17020.1	Adenine nucleotide alpha hydrolases-like superfamily protein	4.0157	2	2	0	0	0	0	131310000	0	0	0	0	0	0	0	0	0	0	0	0	0	88284000	0
AT3G17160.1	unknown protein; FUNCTIONS IN: molecular_function unknown; INVOLVED IN: biological_process unknown; LOCATED IN: cellular_component unknown; EXPRESSED IN: 23 plant structures; EXPRESSED DURING: 13 growth stages; Has 54259 Blast hits to 25265 proteins in 12	13.649	1	1	0	0	0	0	0	0	0	0	0	0	0	78893000	70495000	0	0	0	0	78183000	0	95481000
AT3G17205.2;AT3G17205.3;AT3G17205.1	ubiquitin protein ligase 6 ; ubiquitin protein ligase 6 ; ubiquitin protein ligase 6	7.609	3;3;3	3;3;3	0	150430000	197120000	0	225010000	0	288540000	0	141270000	0	190790000	140630000	0	136790000	0	0	0	0	0	154410000
AT3G17210.1	heat stable protein 1	130.46	3	3	130370000	250670000	224260000	124370000	141670000	95599000	241090000	131240000	227690000	359020000	136080000	173510000	97019000	460780000	120440000	129590000	0	106660000	193510000	0
AT3G17240.3;AT3G17240.1	lipoamide dehydrogenase 2 ; lipoamide dehydrogenase 2	136.42	14;14	7;7	531870000	630360000	672220000	609690000	705320000	312360000	954830000	458990000	410730000	730150000	328760000	543790000	605200000	948620000	633740000	812860000	652410000	601210000	345680000	570830000
AT3G17300.1	unknown protein; Has 48 Blast hits to 48 proteins in 21 species: Archae - 0; Bacteria - 0; Metazoa - 0; Fungi - 0; Plants - 40; Viruses - 0; Other Eukaryotes - 8 (source: NCBI BLink).	2.6553	1	1	0	0	0	0	0	0	0	0	0	0	0	0	0	0	0	0	0	0	0	18121000
AT3G17340.1;AT3G17340.2	ARM repeat superfamily protein ; ARM repeat superfamily protein	7.1392	3;3	3;3	0	0	0	8131300	8079100	0	0	0	0	0	0	8765900	0	0	0	0	0	0	0	6980300
AT3G17360.1;AT3G19050.1	phragmoplast orienting kinesin 1 ; phragmoplast orienting kinesin 2	1.7446	2;1	1;0	0	0	0	0	0	0	0	0	0	0	0	0	0	0	0	0	64380000	0	0	0
AT3G17390.1	S-adenosylmethionine synthetase family protein	323.31	22	14	7149300000	7905500000	7928800000	7914900000	13901000000	8912600000	11715000000	8318800000	8535400000	9111400000	9070100000	7046500000	7877600000	18921000000	10528000000	10617000000	13654000000	8488600000	10314000000	8565200000
AT3G17430.1	Nucleotide-sugar transporter family protein	1.8486	1	1	0	0	0	0	0	0	0	0	0	0	0	0	0	0	0	0	0	0	30525000	0
AT3G17465.1	ribosomal protein L3 plastid	10.037	4	4	79072000	74425000	80635000	74217000	118960000	89191000	0	90590000	85644000	0	148500000	88706000	71768000	108070000	0	87383000	92560000	0	41701000	0
AT3G17770.1	Dihydroxyacetone kinase	1.8008	1	1	0	0	0	0	0	0	0	0	0	0	0	0	0	0	0	3236200	0	0	0	0
AT3G17810.1	pyrimidine 1	127.74	9	9	307340000	430910000	277720000	397190000	609780000	395860000	468270000	522000000	348690000	601940000	463120000	365000000	333840000	662120000	721550000	590370000	564740000	416630000	629630000	563270000
AT3G17820.1	glutamine synthetase 1.3	323.31	16;2	12;1	2045400000	1760900000	1702200000	1567000000	1597600000	1361800000	1913100000	1603000000	1885000000	1916000000	1910700000	1421400000	1387400000	2293400000	1468300000	941100000	1627000000	1374500000	1568800000	1170300000
AT3G17840.1	receptor-like kinase 902	10.736	2	2	25126000	0	20092000	19393000	22863000	16151000	15633000	14112000	0	22264000	13654000	19160000	26240000	27459000	13111000	0	0	0	10063000	0
AT3G17940.1	Galactose mutarotase-like superfamily protein	55.987	8	8	574050000	454660000	415100000	557700000	575250000	413140000	549520000	327380000	603900000	318020000	340570000	416180000	446080000	925600000	316800000	555480000	626690000	264970000	412060000	378740000
AT3G17970.1	translocon at the outer membrane of chloroplasts 64-III	15.269	1	1	0	0	0	0	0	0	0	0	0	0	0	0	0	0	0	0	0	45148000	0	0
AT3G18000.1	S-adenosyl-L-methionine-dependent methyltransferases superfamily protein	101.81	13	9	876200000	1114600000	489260000	699200000	1253300000	662350000	417850000	569030000	816510000	1007600000	416000000	631350000	906430000	1111500000	433480000	1135200000	779790000	842080000	797220000	764530000
AT3G18035.1	winged-helix DNA-binding transcription factor family protein	3.9241	1	1	0	0	0	0	0	0	0	0	0	0	0	0	0	0	0	0	0	0	0	37022000
AT3G18060.1	transducin family protein / WD-40 repeat family protein	62.22	6	6	157610000	195190000	150230000	153470000	49895000	146920000	73310000	114950000	184090000	297660000	190280000	168220000	214730000	126620000	94255000	148670000	70818000	195820000	181260000	133670000
AT3G18130.1	receptor for activated C kinase 1C	195.64	15	4	1848400000	1516500000	1277200000	1506100000	2157500000	1637200000	2231000000	1255600000	1115800000	1021100000	733540000	1414700000	1164600000	3345700000	1652200000	1510800000	1809300000	1235000000	1112000000	954200000
AT3G18165.1	modifier of snc1,4	31.53	1	1	0	0	0	0	0	0	0	0	0	0	0	0	0	0	0	0	0	0	0	111520000
AT3G18190.1	TCP-1/cpn60 chaperonin family protein	239.57	19	19	1627300000	1276900000	1528700000	1672600000	1696900000	1336500000	1713800000	1216400000	1341700000	1570700000	1214700000	1244600000	1531300000	2220100000	1420400000	1216500000	1517100000	1710200000	911950000	1404500000
AT3G18240.2;AT3G18240.1;AT4G21460.1	Ribosomal protein S24/S35, mitochondrial ; Ribosomal protein S24/S35, mitochondrial ; Ribosomal protein S24/S35, mitochondrial	62.543	2;2;1	2;2;1	0	78027000	65792000	57022000	26405000	66498000	0	84512000	113350000	91689000	77229000	97564000	95848000	37815000	0	46122000	0	0	86826000	103970000
AT3G18410.2;AT3G18410.1	Complex I subunit NDUFS6 ; Complex I subunit NDUFS6	43.196	3;3;1	3;3;1	129040000	101150000	213070000	108030000	74336000	87611000	305080000	165270000	112070000	107220000	171140000	139250000	185770000	66803000	124710000	235980000	113150000	194310000	0	0
AT3G18420.1	Protein prenylyltransferase superfamily protein	12.995	2	2	0	0	0	21367000	0	0	0	0	0	0	0	0	0	40523000	0	0	0	0	0	0
AT3G18600.1	P-loop containing nucleoside triphosphate hydrolases superfamily protein	13.7	5	5	113120000	62484000	138300000	163000000	100600000	123470000	52571000	97717000	87265000	67089000	97180000	102070000	110540000	115140000	74705000	85264000	109040000	131760000	0	124310000
AT3G18740.1;AT1G36240.1	Ribosomal protein L7Ae/L30e/S12e/Gadd45 family protein ; Ribosomal protein L7Ae/L30e/S12e/Gadd45 family protein	43.519	6;5	3;2	489990000	338940000	397360000	361290000	737690000	895590000	451560000	550220000	426640000	247940000	286380000	563550000	383110000	540580000	710010000	704430000	535810000	500430000	299610000	605460000
AT3G18780.2;AT3G18780.1	actin 2 ; actin 2	323.31	16;15	1;1	4975800000	6371200000	4131800000	4663600000	7763000000	5045300000	8418200000	5065500000	4898100000	3822600000	4605600000	4487900000	3734000000	9549900000	6233900000	7236900000	7723600000	4112500000	5693200000	5247100000
AT3G18790.1	FUNCTIONS IN: molecular_function unknown; INVOLVED IN: biological_process unknown; LOCATED IN: chloroplast; EXPRESSED IN: 22 plant structures; EXPRESSED DURING: 13 growth stages; CONTAINS InterPro DOMAIN/s: Isy1-like splicing (InterPro:IPR009360); Has 114	4.7531	1	1	0	0	0	0	0	0	0	0	0	0	0	0	0	0	0	0	0	0	0	24064000
AT3G18820.1;AT1G49300.2;AT1G49300.1	RAB GTPase homolog G3F ; RAB GTPase homolog G3E ; RAB GTPase homolog G3E	26.663	2;1;1	2;1;1	0	0	0	153190000	0	0	162580000	0	0	0	108620000	0	0	0	100090000	0	0	0	0	73253000
AT3G18860.1;AT3G18860.2	transducin family protein / WD-40 repeat family protein ; transducin family protein / WD-40 repeat family protein	113.57	9;8	9;8	299080000	262760000	237660000	248940000	275520000	259520000	321030000	260040000	225680000	207040000	353640000	236950000	208070000	404710000	269390000	306310000	231270000	215230000	204730000	310880000
AT3G18940.1	clast3-related	9.3522	2	2	16179000	19870000	20712000	18227000	19976000	14921000	23911000	16961000	22043000	0	0	15921000	16547000	20742000	0	0	0	18913000	18870000	0
AT3G19010.3;AT3G19010.1;AT3G19010.2	2-oxoglutarate (2OG) and Fe(II)-dependent oxygenase superfamily protein ; 2-oxoglutarate (2OG) and Fe(II)-dependent oxygenase superfamily protein ; 2-oxoglutarate (2OG) and Fe(II)-dependent oxygenase superfamily protein	4.3107	4;4;2	4;4;2	0	0	0	0	0	0	0	0	0	0	145360000	0	0	0	0	0	0	0	0	0
AT3G19130.1	RNA-binding protein 47B	11.601	4	3	79802000	57684000	82676000	0	0	102880000	0	100520000	0	71594000	0	86383000	98564000	91284000	0	71492000	0	216610000	49876000	0
AT3G19170.2;AT3G19170.1	presequence protease 1 ; presequence protease 1	65.419	11;11;4;4;4	11;11;4;4;4	67035000	86642000	99342000	113020000	117630000	124840000	119530000	82995000	129480000	93879000	105580000	88174000	151890000	103810000	88620000	89250000	77378000	181630000	88350000	107150000
AT3G19390.1	Granulin repeat cysteine protease family protein	25.811	2	2	0	0	0	0	0	0	0	0	0	0	0	0	0	0	0	0	0	0	121350000	0
AT3G19420.1	PTEN 2	3.5312	2	2	0	0	0	34419000	0	0	0	0	0	36199000	0	35802000	48750000	24199000	0	45653000	46148000	101270000	30805000	0
AT3G19430.1	late embryogenesis abundant protein-related / LEA protein-related	38.81	4	4	196270000	209020000	78912000	108710000	17687000	1049500000	33983000	93261000	243610000	95118000	0	310100000	414460000	31919000	0	63275000	219700000	440420000	299590000	99428000
AT3G19450.1	GroES-like zinc-binding alcohol dehydrogenase family protein	246.22	10	10	699880000	999220000	759710000	677410000	731720000	941800000	1018600000	826220000	769050000	1001600000	807000000	797090000	700660000	167730000	751000000	989880000	905920000	1019100000	1406600000	882510000
AT3G19740.1	P-loop containing nucleoside triphosphate hydrolases superfamily protein	9.8079	2	1	40647000	0	35196000	44417000	43901000	25535000	37280000	27860000	30347000	24903000	26746000	39937000	30201000	80002000	29874000	56115000	33699000	31047000	26245000	23917000
AT3G19760.1	eukaryotic initiation factor 4A-III	86.345	10;1	9;1	687000000	530990000	578890000	616010000	458950000	623200000	603050000	516800000	728400000	571370000	519900000	1017500000	690940000	383880000	401850000	408360000	431080000	828060000	500610000	657080000
AT3G19770.1;AT3G19770.2	Vacuolar sorting protein 9 (VPS9) domain ; Vacuolar sorting protein 9 (VPS9) domain	4.8113	2;1	2;1	0	0	0	0	0	0	0	0	0	0	0	0	0	0	0	0	0	8421000	0	0
AT3G19820.3;AT3G19820.2;AT3G19820.1	cell elongation protein / DWARF1 / DIMINUTO (DIM) ; cell elongation protein / DWARF1 / DIMINUTO (DIM) ; cell elongation protein / DWARF1 / DIMINUTO (DIM)	319.96	13;13;13	13;13;13	2030400000	1875400000	1976700000	2408300000	2574300000	2177800000	2809600000	2112700000	1778800000	1551400000	1868000000	1709800000	1967400000	2653100000	2182300000	2595000000	2359900000	2076600000	1529000000	2232400000
AT3G19910.1	RING/U-box superfamily protein	2.6113	1	1	0	0	0	0	0	0	0	0	0	0	0	0	0	0	0	0	0	0	10769000	0
AT3G19950.1	RING/U-box superfamily protein	179.86	2	2	0	0	0	0	0	0	4900100	0	0	0	0	88808000	87130000	0	19712000	19736000	0	29213000	0	0
AT3G19980.1	flower-specific, phytochrome-associated protein phosphatase 3	35.839	7	1	96683000	217270000	183860000	156980000	139060000	66095000	64804000	197870000	213710000	134170000	126940000	222050000	218570000	191500000	94193000	106060000	148200000	121430000	194460000	158110000
AT3G20000.1	translocase of the outer mitochondrial membrane 40	89.611	5	5	257800000	243980000	401790000	427140000	458850000	320750000	228630000	246740000	249770000	289730000	227040000	300310000	258920000	399540000	216950000	312780000	286260000	478670000	314640000	361450000
AT3G20050.1	T-complex protein 1 alpha subunit	323.31	18	18	1447700000	1121600000	1389900000	960290000	1203900000	1174700000	1649200000	1174300000	1229900000	1309800000	1096100000	1166900000	1302800000	2322300000	1166000000	1145500000	1293000000	1432400000	1179700000	1446100000
AT3G20330.1	PYRIMIDINE B	13.545	2	2	0	0	0	0	0	0	0	0	0	0	0	0	0	0	0	50812000	0	0	0	0
AT3G20370.1	TRAF-like family protein	129.01	8	8	586620000	805560000	661720000	561150000	516920000	502040000	700450000	515790000	716420000	759040000	790300000	484570000	656910000	899970000	524510000	621660000	386210000	437800000	638610000	523520000
AT3G20390.1	endoribonuclease L-PSP family protein	42.454	5	5	66748000	168120000	106330000	92039000	298130000	151450000	89807000	0	120350000	73115000	93313000	103660000	100550000	124630000	142570000	110960000	270140000	125520000	284160000	149820000
AT3G20410.1	calmodulin-domain protein kinase 9	17.502	4;1;1;1;1	4;1;1;1;1	0	0	0	0	0	0	0	0	0	0	0	0	92116000	0	0	0	0	0	0	0
AT3G20510.1	Transmembrane proteins 14C	5.3102	1	1	0	0	0	0	0	0	0	0	0	0	0	0	33663000	0	0	0	0	0	0	0
AT3G20630.1	ubiquitin-specific protease 14	70.247	6	6	196810000	147340000	220100000	283220000	137390000	229210000	333930000	224260000	244700000	227940000	271600000	249580000	287190000	230420000	280100000	0	218590000	0	235830000	0
AT3G20790.1	NAD(P)-binding Rossmann-fold superfamily protein	6.1025	2	2	0	62836000	58174000	71605000	61190000	45483000	65098000	59862000	64821000	56504000	37493000	64133000	45123000	92472000	66780000	33740000	66855000	37919000	57582000	33736000
AT3G20810.3;AT3G20810.1;AT3G20810.2	2-oxoglutarate (2OG) and Fe(II)-dependent oxygenase superfamily protein ; 2-oxoglutarate (2OG) and Fe(II)-dependent oxygenase superfamily protein ; 2-oxoglutarate (2OG) and Fe(II)-dependent oxygenase superfamily protein	8.33	1;1;1	1;1;1	0	0	0	0	0	0	0	0	0	0	0	0	0	0	0	0	0	0	0	25618000
AT3G20890.1	RNA-binding (RRM/RBD/RNP motifs) family protein	4.6002	1	1	0	0	0	0	0	0	0	0	0	0	0	0	0	0	0	0	0	6143100	0	0
AT3G20940.1;AT3G20935.1;AT3G20950.1	cytochrome P450, family 705, subfamily A, polypeptide 30 ; cytochrome P450, family 705, subfamily A, polypeptide 28 ; cytochrome P450, family 705, subfamily A, polypeptide 32	4.761	2;1;1	2;1;1	49020000	0	0	0	0	120100000	0	0	0	0	0	0	54390000	0	62946000	58774000	0	0	0	0
AT3G20980.1	Gag-Pol-related retrotransposon family protein	-2	1	1	0	0	0	0	0	0	0	0	0	0	0	0	0	0	0	0	0	0	14793000	0
AT3G21110.2;AT3G21110.1	purin 7 ; purin 7	6.2982	3;3	3;3	0	0	0	0	0	0	0	0	0	0	0	0	0	0	66940000	0	0	0	0	0
AT3G21140.1	Pyridoxamine 5-phosphate oxidase family protein	3.9155	1	1	0	0	0	0	0	0	0	0	0	0	0	0	0	0	0	0	14801000	0	0	0
AT3G21240.1	4-coumarate:CoA ligase 2	4.7051	2	2	0	0	0	0	0	0	0	0	0	0	0	0	81595000	0	0	0	0	0	0	0
AT3G21540.1	transducin family protein / WD-40 repeat family protein	58.058	4	4	46588000	15207000	51493000	58343000	45726000	38619000	54317000	32894000	38389000	35651000	40702000	0	42260000	0	0	0	29673000	49111000	0	45895000
AT3G21770.1	Peroxidase superfamily protein	3.7366	1	1	0	0	0	0	0	0	0	0	0	0	0	0	0	244300000	0	0	0	0	0	0
AT3G21865.1	peroxin 22	25.466	3	3	0	29561000	40128000	0	0	27796000	28087000	20608000	0	0	29049000	33556000	30671000	35694000	29729000	25900000	42066000	0	29723000	0
AT3G22110.1	20S proteasome alpha subunit C1	77.343	8;1	8;1	507390000	556740000	606000000	715600000	797330000	950480000	679900000	730320000	527580000	890970000	819940000	593010000	567370000	812260000	710100000	628040000	658940000	747210000	593050000	778200000
AT3G22200.1;AT3G22200.2	Pyridoxal phosphate (PLP)-dependent transferases superfamily protein ; Pyridoxal phosphate (PLP)-dependent transferases superfamily protein	323.31	19;19	19;19	1258100000	974830000	1379500000	1430400000	1639600000	1389500000	1999400000	1282900000	1198800000	1215900000	1770600000	1360900000	1355900000	1875500000	1500800000	1266600000	1814000000	1641900000	974160000	1020800000
AT3G22230.1	Ribosomal L27e protein family	7.6288	2	1	0	0	0	0	0	0	0	0	0	0	0	0	0	0	0	0	0	0	0	289570000
AT3G22310.1	putative mitochondrial RNA helicase 1	29.955	8	6	85549000	118950000	172410000	111690000	95259000	357260000	160600000	248260000	139260000	93802000	133380000	138600000	0	39855000	85422000	56892000	134090000	341480000	119850000	170430000
AT3G22320.1	Eukaryotic rpb5 RNA polymerase subunit family protein	2.6673	2	2	0	0	0	0	0	0	0	0	0	0	0	0	0	0	0	0	0	58228000	0	0
AT3G22330.1	putative mitochondrial RNA helicase 2	-2	3	1	0	0	0	0	0	0	0	0	0	0	0	0	0	0	0	0	0	9024800	0	0
AT3G22380.1;AT3G22380.2	time for coffee ; time for coffee	1.8663	2;2	2;2	0	0	0	0	0	0	0	0	0	0	0	0	0	0	0	0	0	0	0	85633000
AT3G22460.1	O-acetylserine (thiol) lyase (OAS-TL) isoform A2	-2	3;1	1;0	0	0	0	0	0	0	0	0	0	0	0	0	0	0	0	0	0	0	134280000	0
AT3G22520.1	unknown protein; INVOLVED IN: biological_process unknown; LOCATED IN: chloroplast stroma, chloroplast, chloroplast envelope; EXPRESSED IN: 24 plant structures; EXPRESSED DURING: 13 growth stages; BEST Arabidopsis thaliana protein match is: unknown protein	1.9544	2	2	0	0	77873000	0	0	0	0	0	0	0	0	0	0	0	0	0	0	0	0	0
AT3G22600.1	Bifunctional inhibitor/lipid-transfer protein/seed storage 2S albumin superfamily protein	16.425	1	1	0	0	0	0	0	0	0	0	0	0	0	0	0	0	0	0	0	0	0	183860000
AT3G22630.1	20S proteasome beta subunit D1	-2	5	1	0	0	0	0	0	0	0	0	0	0	0	0	0	0	0	0	8496800	0	0	0
AT3G22660.1	rRNA processing protein-related	7.8721	2	2	0	0	0	0	0	0	0	0	0	0	0	0	0	0	0	0	0	40483000	0	0
AT3G22845.1	emp24/gp25L/p24 family/GOLD family protein	12.252	2	2	0	0	0	0	205200000	0	314430000	0	0	0	0	0	0	0	0	0	0	0	0	0
AT3G22850.1	Aluminium induced protein with YGL and LRDR motifs	188.96	7	6	383610000	806770000	451800000	408450000	358850000	614360000	648650000	479580000	543780000	586070000	455360000	469950000	379500000	66812000	436290000	619970000	327340000	552530000	836130000	428090000
AT3G22890.1	ATP sulfurylase 1	130.27	6;1	6;1	206900000	134630000	254280000	264770000	172570000	106620000	320060000	164940000	124400000	81138000	200130000	132820000	185550000	358340000	152210000	113870000	144030000	152260000	87326000	186720000
AT3G22960.1	Pyruvate kinase family protein	221.05	12	12	581600000	628360000	623460000	585590000	730690000	610240000	562350000	481330000	575820000	477210000	520900000	548010000	544760000	624480000	491390000	473320000	520710000	630020000	488980000	607350000
AT3G23190.1	HR-like lesion-inducing protein-related	4.4471	1	1	0	0	0	0	0	0	0	0	0	0	0	0	0	0	0	0	0	0	13943000	0
AT3G23300.1;AT4G14360.2;AT4G14360.1	S-adenosyl-L-methionine-dependent methyltransferases superfamily protein ; S-adenosyl-L-methionine-dependent methyltransferases superfamily protein ; S-adenosyl-L-methionine-dependent methyltransferases superfamily protein	16.555	4;3;3	3;2;2	112040000	121650000	145000000	136120000	0	169750000	0	121870000	194760000	0	98011000	184870000	191270000	45595000	81152000	97301000	66083000	164240000	83252000	113120000
AT4G14320.1;AT3G23390.1	Zinc-binding ribosomal protein family protein ; Zinc-binding ribosomal protein family protein	2.078	1;1	1;1	0	0	0	0	0	0	0	0	0	0	0	0	0	0	0	0	0	0	1538900000	0
AT3G23480.1;AT3G23470.1;AT3G23480.2	Cyclopropane-fatty-acyl-phospholipid synthase ; Cyclopropane-fatty-acyl-phospholipid synthase ; Cyclopropane-fatty-acyl-phospholipid synthase	3.2092	1;1;1	1;1;1	0	0	0	0	0	0	0	0	0	0	0	0	0	0	0	0	0	0	0	4202400
AT3G23490.1	cyanase	61.431	1	1	0	0	0	0	0	0	0	0	0	0	0	0	0	0	0	0	0	0	16147000	0
AT3G23530.1;AT3G23510.1	Cyclopropane-fatty-acyl-phospholipid synthase ; Cyclopropane-fatty-acyl-phospholipid synthase	27.475	3;3	3;3	0	0	0	0	0	0	0	16218000	39747000	45012000	0	18095000	0	0	0	0	0	0	0	0
AT3G23560.1	MATE efflux family protein	5.7746	1	1	0	0	0	0	0	0	0	0	0	0	0	0	0	0	0	0	0	0	0	6154200
AT3G23590.1	REF4-related 1	1.978	1	1	0	0	0	0	0	0	0	1296400	0	0	0	0	0	0	0	0	0	0	0	0
AT3G23600.2;AT3G23600.1	alpha/beta-Hydrolases superfamily protein ; alpha/beta-Hydrolases superfamily protein	104.37	6;6	6;6	201660000	296350000	200650000	231640000	187100000	128320000	223870000	142080000	218120000	326120000	204880000	238400000	182320000	314870000	175340000	238960000	177180000	179050000	356890000	178760000
AT3G23620.1	Ribosomal RNA processing Brix domain protein	6.0864	3	3	0	0	0	0	0	0	0	0	0	0	0	0	0	0	0	0	0	130840000	0	0
AT3G23660.1;AT3G23660.2	Sec23/Sec24 protein transport family protein ; Sec23/Sec24 protein transport family protein	53.244	8;8	5;5	138430000	111220000	121570000	148080000	122740000	105180000	115730000	84232000	154610000	192420000	168750000	131610000	185600000	191740000	94548000	136740000	0	197460000	0	119520000
AT3G23750.1	Leucine-rich repeat protein kinase family protein	12.882	3	3	0	0	0	59584000	54045000	50580000	0	49601000	55889000	57648000	0	56522000	62328000	61187000	52484000	0	56487000	0	0	0
AT3G23810.1	S-adenosyl-l-homocysteine (SAH) hydrolase 2	199.28	25	8	501280000	578370000	621980000	570540000	549110000	416590000	744910000	469870000	986570000	967920000	611670000	446140000	592340000	703250000	627580000	710710000	494440000	680150000	718130000	381850000
AT3G23820.1	UDP-D-glucuronate 4-epimerase 6	22.485	3	3	0	0	0	0	0	0	0	0	50758000	0	63118000	84510000	44550000	0	56654000	0	65776000	0	46501000	41789000
AT3G23830.2;AT3G23830.1	glycine-rich RNA-binding protein 4 ; glycine-rich RNA-binding protein 4	42.837	2;2	2;2	215820000	151180000	218620000	0	166270000	28636000	201460000	77833000	108550000	153030000	124520000	174900000	192280000	345750000	114430000	121710000	45532000	68426000	206500000	153530000
AT3G23890.2;AT3G23890.1	topoisomerase II ; topoisomerase II	3.9284	2;2	2;2	0	0	0	0	0	0	0	0	0	0	0	0	0	0	0	0	0	0	0	3381200
AT3G23920.1	beta-amylase 1	9.0776	2	2	0	0	0	0	0	0	0	0	0	0	0	0	0	0	0	0	0	0	43951000	0
AT3G23940.2;AT3G23940.1	dehydratase family ; dehydratase family	84.078	9;9	9;9	532760000	307630000	538080000	436190000	625710000	460060000	764070000	459500000	618930000	335620000	423660000	463820000	626710000	1016200000	539770000	537480000	653330000	413350000	316760000	477550000
AT3G23980.1	BLISTER	2.8813	1	1	0	0	0	0	0	0	0	0	0	0	0	0	0	0	0	0	0	11290000	0	0
AT3G23990.1	heat shock protein 60	323.31	21	14	3978300000	3337300000	3869100000	3355200000	5926900000	5118000000	5014000000	3705700000	3385500000	2801400000	3409800000	3833500000	3800100000	4623100000	3737300000	4249800000	4390200000	4044600000	3652400000	4565300000
AT3G24170.3;AT3G24170.2;AT3G24170.1	glutathione-disulfide reductase ; glutathione-disulfide reductase ; glutathione-disulfide reductase	243.73	17;17;17	17;17;17	983160000	1088600000	1262800000	1199200000	933920000	777570000	1722900000	1008500000	938080000	1284200000	1375200000	1161400000	1009500000	1745800000	837650000	1173000000	1039400000	1053800000	618420000	1097400000
AT3G24350.1;AT3G24350.2	syntaxin of plants 32 ; syntaxin of plants 32	40.69	2;2	2;2	26288000	25570000	22227000	24265000	26156000	29960000	52116000	25294000	27177000	47093000	30962000	24250000	26296000	22665000	33668000	30813000	0	54659000	0	42659000
AT3G24503.1	aldehyde dehydrogenase 2C4	49.302	6	6	152130000	160900000	193620000	166560000	152970000	111350000	224400000	108630000	163770000	234870000	279450000	141540000	173310000	166820000	136370000	122840000	106220000	120960000	125040000	125430000
AT3G24530.1	AAA-type ATPase family protein / ankyrin repeat family protein	7.2531	2	2	0	0	0	0	0	0	0	0	0	0	0	0	54537000	48325000	0	0	29011000	0	0	0
AT3G24550.1	proline extensin-like receptor kinase 1	19.246	3;1;1;1;1	2;0;1;0;0	5078200	4819900	4177600	3474200	0	0	0	0	0	0	0	0	0	0	0	2000400	0	6748400	19441000	0
AT3G24830.1	Ribosomal protein L13 family protein	148.04	6	3	920410000	675730000	765840000	1003200000	2863800000	2918500000	1140900000	1835900000	728150000	685230000	915300000	1232500000	910690000	2353300000	1556200000	1957000000	2070000000	1320300000	956520000	1680500000
AT3G25110.1	fatA acyl-ACP thioesterase	34.755	3	3	0	0	0	0	0	0	105440000	93803000	0	0	78362000	0	0	0	75417000	0	78201000	0	112640000	0
AT3G25140.1	Nucleotide-diphospho-sugar transferases superfamily protein	7.0982	5	4	85405000	84575000	86351000	0	0	39781000	59986000	0	87481000	0	55502000	0	0	0	48235000	0	59508000	0	0	76259000
AT3G25150.1;AT3G25150.2	Nuclear transport factor 2 (NTF2) family protein with RNA binding (RRM-RBD-RNP motifs) domain ; Nuclear transport factor 2 (NTF2) family protein with RNA binding (RRM-RBD-RNP motifs) domain	94.282	3;3	3;3	86024000	86181000	79277000	95734000	34348000	84488000	21389000	59072000	80341000	0	73028000	90890000	92477000	47934000	50198000	68722000	88532000	108440000	46755000	93782000
AT3G25220.1	FK506-binding protein 15 kD-1	74.465	4	3	343730000	601090000	273990000	288920000	637910000	435320000	542640000	477780000	488260000	479540000	377780000	479360000	364070000	571390000	435720000	554600000	728140000	363740000	489860000	365590000
AT3G25230.1;AT3G25230.2	rotamase FKBP 1 ; rotamase FKBP 1	87.891	12;12	12;12	753830000	633880000	699610000	1177000000	808590000	1390900000	422060000	1058300000	1072000000	707230000	593230000	962010000	928160000	169500000	918310000	851140000	1046300000	1068900000	932900000	1079500000
AT3G25520.1;AT3G25520.2	ribosomal protein L5 ; ribosomal protein L5	139.66	11;9	3;3	2398900000	2499900000	2458000000	2410000000	2662400000	3710400000	2790600000	2692400000	2363900000	1881900000	2206300000	2751900000	2202000000	2688700000	2785900000	2442400000	2954500000	2873900000	2347100000	2248900000
AT3G25530.1;AT3G25530.2	glyoxylate reductase 1 ; glyoxylate reductase 1	81.304	7;5	7;5	244290000	220430000	238800000	283050000	271730000	253350000	238370000	183060000	326780000	277740000	262170000	258610000	237370000	281780000	250220000	259100000	214480000	181900000	111600000	220290000
AT3G25545.1	unknown protein; FUNCTIONS IN: molecular_function unknown; INVOLVED IN: biological_process unknown; LOCATED IN: cellular_component unknown; EXPRESSED IN: 23 plant structures; EXPRESSED DURING: 13 growth stages; Has 38 Blast hits to 38 proteins in 14 speci	5.8966	1	1	0	0	0	0	0	0	0	0	0	0	0	0	0	0	0	0	0	0	22346000	0
AT3G25660.1	Amidase family protein	1.8615	1	1	0	0	0	0	0	0	0	0	0	0	0	0	0	0	0	0	0	0	0	32418000
AT3G25700.1	Eukaryotic aspartyl protease family protein	4.5641	1	1	0	0	0	0	0	0	0	0	0	0	0	0	0	0	0	0	0	0	0	9242100
AT3G25780.1	allene oxide cyclase 3	2.1006	1	1	0	0	0	0	0	0	0	0	0	0	0	0	0	0	0	0	0	0	22053000	0
AT3G25800.1;AT3G25800.2	protein phosphatase 2A subunit A2 ; protein phosphatase 2A subunit A2	104.78	12;10	6;4	320540000	291860000	271720000	366220000	305420000	219320000	361590000	216020000	322550000	446510000	345330000	306070000	363870000	412420000	273170000	302500000	145480000	254190000	169100000	312740000
AT3G25860.1	2-oxoacid dehydrogenases acyltransferase family protein	111.9	12	10	1129300000	1090700000	1198300000	1077200000	1389400000	1575900000	1603200000	1141600000	1224200000	1129300000	890370000	1097400000	1003200000	1164300000	1032900000	1259200000	1282500000	1159300000	957360000	1017800000
AT3G26370.1	O-fucosyltransferase family protein	15.664	1	1	0	0	0	0	0	0	0	0	0	0	0	0	0	0	0	0	0	7581000	0	0
AT3G26400.1	eukaryotic translation initiation factor 4B1	3.8092	1	1	0	0	0	0	0	0	0	0	0	0	0	0	0	0	0	0	0	0	41807000	0
AT3G26520.1	tonoplast intrinsic protein 2	150.57	2	2	1097100000	751630000	369100000	620630000	1016800000	812780000	1121900000	761430000	585150000	802850000	820880000	1026600000	415330000	1076700000	910190000	1014200000	1008900000	488660000	725340000	1101400000
AT3G26720.2;AT3G26720.1	Glycosyl hydrolase family 38 protein ; Glycosyl hydrolase family 38 protein	4.3933	2;2	2;2	0	0	0	0	0	0	0	0	0	0	0	0	27952000	0	0	0	0	0	0	0
AT3G26820.1	Esterase/lipase/thioesterase family protein	2.0774	2	2	0	0	0	0	0	0	496560000	0	0	0	0	0	0	0	0	0	0	0	0	0
AT3G26935.1	DHHC-type zinc finger family protein	1.8755	1	1	0	0	0	0	0	0	0	0	0	0	0	0	0	0	0	0	3765700	0	0	0
AT3G27080.1	translocase of outer membrane 20 kDa subunit 3	11.876	2	2	0	0	0	57540000	46564000	47634000	0	0	0	0	0	95728000	80241000	27431000	0	62714000	0	72016000	0	81787000
AT3G27190.1	uridine kinase-like 2	17.046	4;1;1;1	3;1;1;1	0	0	0	0	0	0	0	0	0	0	0	0	0	0	0	0	0	47737000	0	0
AT3G27240.1	Cytochrome C1 family	84.472	6	3	447230000	421900000	530140000	543060000	701200000	821330000	868440000	716760000	548970000	491390000	553450000	433690000	578630000	819490000	851690000	890560000	777270000	604650000	383300000	635500000
AT3G27280.2;AT3G27280.1	prohibitin 4 ; prohibitin 4	5.8217	6;6	3;3	0	0	0	108060000	0	0	0	0	0	0	0	0	0	0	0	0	0	0	0	0
AT3G27300.3;AT3G27300.2;AT3G27300.1	glucose-6-phosphate dehydrogenase 5 ; glucose-6-phosphate dehydrogenase 5 ; glucose-6-phosphate dehydrogenase 5	136.1	6;6;6	3;3;3	51021000	73173000	44435000	50724000	41599000	30858000	55008000	32208000	70827000	84324000	53906000	45131000	45959000	57476000	46685000	50329000	26422000	40278000	40429000	51738000
AT3G27380.2;AT3G27380.1;AT5G40650.1	succinate dehydrogenase 2-1 ; succinate dehydrogenase 2-1 ; succinate dehydrogenase 2-2	22.998	5;5;4	5;5;4	171160000	143310000	96681000	127290000	232200000	163240000	198360000	252860000	124760000	0	126630000	147770000	144940000	291410000	236700000	278630000	173350000	155120000	125230000	165790000
AT3G27430.3;AT3G27430.1;AT3G27430.2;AT5G40580.3;AT5G40580.2;AT5G40580.1	N-terminal nucleophile aminohydrolases (Ntn hydrolases) superfamily protein ; N-terminal nucleophile aminohydrolases (Ntn hydrolases) superfamily protein ; N-terminal nucleophile aminohydrolases (Ntn hydrolases) superfamily protein ; 20S proteasome beta s	2.6106	2;2;2;1;1;1	2;2;2;1;1;1	0	0	0	0	0	0	0	0	0	0	0	0	0	0	0	0	0	0	97697000	0
AT3G27530.1	golgin candidate 6	24.136	7	7	0	64776000	0	76867000	32499000	0	0	0	0	0	0	0	0	0	0	0	37087000	70044000	0	0
AT3G27570.1	Sucrase/ferredoxin-like family protein	17.087	2	2	16098000	24833000	15253000	15643000	0	20677000	0	54530000	20997000	25518000	14979000	11862000	0	0	22131000	4628500	326780000	16476000	310010000	0
AT3G27740.1	carbamoyl phosphate synthetase A	7.3752	5;2	5;2	0	0	0	0	0	0	0	0	330660000	0	308750000	0	0	412000000	0	0	156030000	0	0	0
AT3G27890.1	NADPH:quinone oxidoreductase	5.7008	2	2	0	0	0	0	0	0	0	0	0	0	0	0	0	0	0	0	84105000	0	0	0
AT3G27960.1	Tetratricopeptide repeat (TPR)-like superfamily protein	2.1206	1	1	0	0	0	0	0	0	0	0	0	0	0	0	0	0	0	0	0	0	0	6255100
AT3G28200.1	Peroxidase superfamily protein	17.271	2	2	54222000	74422000	0	77666000	46145000	37134000	0	0	0	0	0	33140000	0	0	0	0	0	0	0	0
AT3G28710.1	ATPase, V0/A0 complex, subunit C/D	4.6222	7	1	0	0	0	0	0	0	0	0	0	0	0	0	0	0	0	0	0	0	0	74321000
AT3G28715.1;AT3G28715.2	ATPase, V0/A0 complex, subunit C/D ; ATPase, V0/A0 complex, subunit C/D	170.06	8;6	2;1	141150000	237910000	248990000	289180000	259040000	138080000	270160000	225330000	348460000	364210000	249890000	206010000	145200000	542180000	368650000	279000000	207860000	205050000	270300000	195330000
AT3G28720.1	unknown protein; FUNCTIONS IN: molecular_function unknown; INVOLVED IN: biological_process unknown; LOCATED IN: cellular_component unknown; EXPRESSED IN: 25 plant structures; EXPRESSED DURING: 13 growth stages; BEST Arabidopsis thaliana protein match is:	14.669	2	2	0	0	0	0	0	0	0	0	0	0	0	0	0	0	0	0	0	0	0	33961000
AT3G28730.1	high mobility group	2.4818	1	1	0	0	0	0	0	0	0	0	0	0	0	0	0	0	0	0	0	0	0	26025000
AT3G28860.1	ATP binding cassette subfamily B19	85.403	5	5	105530000	78981000	89737000	110040000	89183000	78710000	82306000	79036000	87825000	130420000	73479000	74453000	112690000	84818000	63759000	86388000	99730000	84326000	76619000	88983000
AT3G28940.1	AIG2-like (avirulence induced gene) family protein	41.225	3	3	0	0	0	0	0	0	76283000	0	0	0	0	0	0	0	0	0	0	0	0	0
AT3G28950.1	AIG2-like (avirulence induced gene) family protein	8.0483	2	2	0	0	0	0	0	0	0	0	0	0	0	0	0	0	0	0	0	0	11280000	0
AT3G29250.2;AT3G29250.1	NAD(P)-binding Rossmann-fold superfamily protein ; NAD(P)-binding Rossmann-fold superfamily protein	18.525	4;4;1	4;4;1	0	194000000	0	108590000	77418000	0	328340000	0	0	183740000	272770000	124710000	118230000	39069000	215850000	280760000	176350000	75492000	195340000	0
AT3G29320.1	Glycosyl transferase, family 35	19.04	2	2	0	0	0	0	0	0	14205000	0	0	21055000	0	0	17930000	0	0	0	0	0	0	0
AT3G29350.2;AT3G29350.1	histidine-containing phosphotransmitter 2 ; histidine-containing phosphotransmitter 2	18.153	3;3	3;3	26212000	50324000	36942000	27864000	30662000	0	0	0	37177000	65718000	18987000	20511000	22099000	28265000	0	35811000	21538000	43679000	32942000	23632000
AT3G29360.2;AT3G29360.1	UDP-glucose 6-dehydrogenase family protein ; UDP-glucose 6-dehydrogenase family protein	144.14	14;14	5;5	703710000	532140000	626590000	803140000	944550000	667020000	959170000	649990000	661340000	491700000	665310000	624410000	649370000	1058600000	670440000	685970000	647240000	392940000	610710000	464140000
AT3G29400.1	exocyst subunit exo70 family protein E1	1.9815	1	1	0	0	0	0	0	0	0	0	0	0	0	0	0	0	0	0	0	0	0	4488100
AT3G29410.1	Terpenoid cyclases/Protein prenyltransferases superfamily protein	10.549	4	4	64875000	34324000	36288000	47875000	0	0	39796000	31415000	57522000	92648000	36681000	39794000	55522000	46050000	39356000	29771000	25414000	31597000	0	0
AT3G32030.1	Terpenoid cyclases/Protein prenyltransferases superfamily protein	5.1729	1	1	0	0	0	0	0	0	0	0	0	0	0	0	0	0	0	0	3702300	0	0	0
AT3G32980.1	Peroxidase superfamily protein	202.75	8	6	443420000	1402100000	314610000	363020000	289290000	201100000	462960000	214480000	904860000	1362800000	395730000	360900000	394650000	367750000	364940000	1094100000	212940000	286040000	1174600000	404000000
AT3G42050.1	vacuolar ATP synthase subunit H family protein	277.49	10	10	688840000	835610000	602480000	507180000	494220000	381400000	819330000	432150000	692320000	938370000	735200000	533200000	604960000	570080000	583430000	556950000	607030000	457460000	486740000	408270000
AT3G42170.1	BED zinc finger ;hAT family dimerisation domain	26.767	6	6	105820000	85154000	92583000	0	0	75465000	0	83207000	0	0	0	93698000	0	105090000	83997000	0	85690000	0	0	0
AT3G43300.1;AT3G43300.2	HOPM interactor 7 ; HOPM interactor 7	323.31	22;21	22;21	575970000	597300000	519910000	603610000	389690000	420130000	412510000	464570000	689510000	737500000	623930000	537620000	605030000	542880000	409060000	421760000	491800000	734070000	463970000	679200000
AT3G43520.1	Transmembrane proteins 14C	19.727	2	2	0	0	0	0	0	0	0	0	0	0	0	0	0	0	3799700	0	15543000	0	0	0
AT3G43600.1	aldehyde oxidase 2	23.495	6	6	0	41104000	34819000	44602000	38243000	34110000	37278000	25790000	0	0	42014000	0	45240000	0	30880000	27045000	0	38877000	31196000	41942000
AT4G33865.1;AT3G44010.1;AT3G43980.1	Ribosomal protein S14p/S29e family protein ; Ribosomal protein S14p/S29e family protein ; Ribosomal protein S14p/S29e family protein	11.898	3;3;3	3;3;3	115370000	186770000	58015000	0	0	0	13574000	647510000	237980000	58036000	485070000	48575000	0	25470000	268010000	0	186960000	0	3540200000	63264000
AT3G44100.1	MD-2-related lipid recognition domain-containing protein	5.4424	2	2	0	92644000	0	0	0	262310000	116990000	205790000	0	95024000	95048000	208770000	0	202320000	234270000	317000000	0	0	0	197660000
AT3G44110.1;AT3G44110.2	DNAJ homologue 3 ; DNAJ homologue 3	323.31	12;11	7;6	961810000	794790000	890300000	898720000	740290000	1058800000	891740000	898730000	814900000	814880000	932480000	1062900000	1311900000	763720000	570990000	848540000	783260000	1423400000	674600000	1194700000
AT3G44190.1	FAD/NAD(P)-binding oxidoreductase family protein	43.415	4	4	137470000	64813000	119730000	0	142730000	82654000	196370000	93294000	103270000	144660000	122730000	117970000	89801000	158110000	100370000	71397000	52103000	122370000	75760000	187630000
AT3G44300.1	nitrilase 2	59.328	6	2	106780000	96289000	110000000	94975000	137590000	99109000	172330000	100650000	118850000	113390000	148100000	107290000	139900000	167190000	132000000	82328000	106990000	95413000	116360000	142190000
AT3G44310.3;AT3G44310.1;AT3G44310.2	nitrilase 1 ; nitrilase 1 ; nitrilase 1	81.72	10;10;5	6;6;2	244580000	382940000	342360000	359760000	341990000	308580000	459760000	405160000	278810000	288320000	446790000	343280000	339490000	504270000	431710000	353950000	359250000	321110000	412070000	211060000
AT3G44320.1	nitrilase 3	41.167	6	3	75409000	122100000	119930000	131240000	130590000	132310000	238770000	134330000	132570000	111910000	174330000	87778000	96829000	136550000	174210000	107330000	140770000	95059000	168140000	133150000
AT3G44330.1	INVOLVED IN: protein processing; LOCATED IN: mitochondrion, endoplasmic reticulum, plasma membrane, vacuole; EXPRESSED IN: 25 plant structures; EXPRESSED DURING: 13 growth stages; CONTAINS InterPro DOMAIN/s: Nicalin (InterPro:IPR016574), EF-Hand 1, calciu	323.31	12	12	353140000	317340000	447280000	507530000	431380000	427850000	518760000	441740000	331180000	467590000	418700000	444530000	365110000	585260000	404230000	335900000	401060000	439180000	294240000	278150000
AT3G44340.2;AT3G44340.1	clone eighty-four ; clone eighty-four	45.801	9;9	9;9	201560000	161600000	152270000	174780000	372480000	312530000	254730000	208460000	197370000	180000000	223820000	195350000	130430000	232390000	207300000	256860000	268610000	195880000	191640000	259580000
AT3G44590.2;AT3G44590.1	60S acidic ribosomal protein family ; 60S acidic ribosomal protein family	28.014	2;2	2;2	57790000	0	0	89490000	117480000	67223000	0	0	119730000	67704000	0	95873000	76595000	72998000	56969000	0	0	88233000	0	0
AT3G44600.1	cyclophilin71	6.0603	3	3	0	0	0	0	0	0	0	0	0	0	0	0	104750000	37724000	0	0	0	0	0	0
AT3G44750.2;AT3G44750.1	histone deacetylase 3 ; histone deacetylase 3	212.05	6;6	6;6	667830000	353890000	729980000	740570000	539090000	585410000	626950000	593520000	634240000	435980000	511920000	747250000	855920000	878080000	527920000	567800000	596680000	905560000	293530000	782130000
AT5G62300.2;AT5G62300.1;AT3G45030.1	Ribosomal protein S10p/S20e family protein ; Ribosomal protein S10p/S20e family protein ; Ribosomal protein S10p/S20e family protein	52.395	9;9;9	3;3;3	3309300000	3846300000	3218300000	3308400000	3782000000	5918000000	5314700000	4750500000	2773600000	3007600000	2662000000	3530500000	3054500000	3522500000	5056200000	3022000000	3951800000	3574800000	3659500000	3412600000
AT3G45190.1	SIT4 phosphatase-associated family protein	23.599	6	6	51041000	0	0	53071000	49170000	0	42581000	0	68797000	0	47705000	48154000	0	0	48020000	43994000	35153000	0	0	0
AT3G45525.1	BEST Arabidopsis thaliana protein match is: RING/U-box protein with C6HC-type zinc finger (TAIR:AT3G45480.1); Has 31 Blast hits to 29 proteins in 2 species: Archae - 0; Bacteria - 0; Metazoa - 0; Fungi - 0; Plants - 31; Viruses - 0; Other Eukaryotes - 0 (	2.2822	1	1	0	0	0	0	0	0	0	0	0	0	0	0	0	0	0	0	0	0	178500000	0
AT3G46000.1	actin depolymerizing factor 2	39.47	3	2	113860000	135350000	0	0	0	0	0	0	0	0	80783000	91575000	0	0	0	0	0	0	128760000	76512000
AT3G46010.1;AT3G46010.2	actin depolymerizing factor 1 ; actin depolymerizing factor 1	-2	3;2	1;1	0	0	0	0	0	0	0	0	0	0	0	0	0	0	0	0	0	0	0	15934000
AT3G46060.3;AT3G46060.2;AT3G46060.1;AT5G03520.2;AT5G03520.1	RAB GTPase homolog 8A ; RAB GTPase homolog 8A ; RAB GTPase homolog 8A ; RAB GTPase homolog 8C ; RAB GTPase homolog 8C	188.77	4;4;4;2;2	1;1;1;0;0	146630000	194110000	158330000	50162000	99408000	129710000	214640000	565200000	271720000	267130000	902250000	381680000	223800000	28517000	951220000	20150000	718900000	116120000	1623800000	253230000
AT3G46100.1	Histidyl-tRNA synthetase 1	13.021	2	2	0	0	0	10538000	0	7430500	0	6020600	9176000	15374000	8439200	0	11429000	0	7487900	11372000	0	0	0	12578000
AT3G46220.3;AT3G46220.1;AT3G46220.2	unknown protein; INVOLVED IN: biological_process unknown; EXPRESSED IN: 24 plant structures; EXPRESSED DURING: 13 growth stages; CONTAINS InterPro DOMAIN/s: Protein of unknown function DUF2042 (InterPro:IPR018611). ; unknown protein; CONTAINS InterPro DOM	3.6652	1;1;1	1;1;1	0	0	0	0	0	0	0	0	0	0	0	0	0	0	0	0	0	0	0	36421000
AT3G46280.1	protein kinase-related	6.4619	2	2	0	0	0	0	0	0	0	0	0	0	0	0	0	0	0	52134000	0	0	0	0
[truncated: 1,482 more rows]

## Sheet: Significant
Table S1. Proteome analysis of control and auxin-treated seedlings - differentially abundant proteins (statistics)
[truncated: 128 more rows]
[truncated: 7 more columns]

## Sheet: Unique
Table S1. Proteome analysis of control and auxin-treated seedlings - differentially abundant proteins (unique)
[truncated: 6 more rows]
