# Supplementary material for: The Arabidopsis Root Tip (Phospho)Proteomes at Growth-Promoting versus Growth-Repressing Conditions Reveal Novel Root Growth Regulators
Source: Cells. 2021 Jul 2;10(7):1665. doi: 10.3390/cells10071665 (PMC8303113; doi:10.3390/cells10071665)
Supplement: Supplementary file 1 [file cells-10-01665-s001.zip › Nikonorova_Table S2.xlsx]

## Sheet: All identifications
Table S2. Phosphoproteome analysis of control and auxin-treated seedlings.
Leading proteins	Protein	Fasta headers	Localization prob	Amino acid	Position	Score diff	PEP	Score	Delta score	Score for localization	Intensity 12_2p3_EXT-886_PSB__10-1	Intensity 16_2p3_EXT-886_PSB__100-1	Intensity 18_2p3_EXT-886_PSB__0-1	Intensity 20_2p3_EXT-886_PSB__01-1	Intensity 22_2p3_EXT-886_PSB__01-2	Intensity 26_2p3_EXT-886_PSB__10-2	Intensity 32_2p3_EXT-886_PSB__100-2	Intensity 34_2p3_EXT-886_PSB__0-2	Intensity 36_2p3_EXT-886_PSB__10-3	Intensity 38_2p3_EXT-886_PSB__100-3	Intensity 40_2p3_EXT-886_PSB__01-3	Intensity 42_2p3_EXT-886_PSB__0-3	Intensity 44_2p3_EXT-886_PSB__10-4	Intensity 46_2p3_EXT-886_PSB__0-4	Intensity 52_2p3_EXT-886_PSB__01-4	Intensity 56_2p3_EXT-886_PSB__100-4	Intensity 58_2p3_EXT-886_PSB__10-5	Intensity 60_2p3_EXT-886_PSB__0-5	Intensity 62_2p3_EXT-886_PSB__100-5	Intensity 66_2p3_EXT-886_PSB__01-5
AT1G01100.3	AT1G01100.3	60S acidic ribosomal protein family ; 60S acidic ribosomal protein family ; 60S acidic ribosomal protein family ; 60S acidic ribosomal protein family ; 60S acidic ribosomal protein family ; 60S acidic ribosomal protein family ; 60S acidic ribosomal protei	1	S	86	95.6662	7.87118e-177	303.05	287.79	95.666	258960000	151000000	157850000	330250000	248670000	489670000	141370000	87466000	176580000	108460000	102130000	379560000	373310000	259890000	130040000	481760000	10616000	464660000	9154500	148530000
AT1G01120.1	AT1G01120.1	3-ketoacyl-CoA synthase 1	0.999908	S	6	40.365	2.18718e-10	115.33	84.598	115.33	29311000	31765000	67466000	38280000	27702000	24660000	37788000	56618000	70214000	25805000	54534000	56173000	32543000	40841000	48424000	37122000	7747000	31595000	16321000	23957000
AT1G01260.3	AT1G01260.3	basic helix-loop-helix (bHLH) DNA-binding superfamily protein ; basic helix-loop-helix (bHLH) DNA-binding superfamily protein ; basic helix-loop-helix (bHLH) DNA-binding superfamily protein	0.993099	S	395	21.5811	1.08781e-08	85.658	75.861	81.077	6358300	11565000	5660200	12356000	8003400	9875000	11720000	4610600	5793000	5488300	0	7859500	7900900	6299100	0	5561800	0	0	2457500	7662200
AT1G01280.1	AT1G01280.1	cytochrome P450, family 703, subfamily A, polypeptide 2	1	S	97	42.109	0.00366955	50.878	38.652	42.109	13900000	0	13460000	0	0	0	7542100	8626300	12693000	0	9380200	9883400	10584000	0	6972700	9849400	6483500	9929500	3877800	5587500
AT1G01280.1	AT1G01280.1	cytochrome P450, family 703, subfamily A, polypeptide 2	1	S	98	42.109	0.00366955	50.878	38.652	42.109	13900000	0	13460000	0	0	0	7542100	8626300	12693000	0	9380200	9883400	10584000	0	6972700	9849400	6483500	9929500	3877800	5587500
AT1G01370.2	AT1G01370.2	Histone superfamily protein ; Histone superfamily protein	0.877742	S	53	12.0495	2.57029e-08	112.44	92.885	112.44	5462800	1939200	0	11561000	7812200	8770700	3316200	0	6573500	4256700	3035900	5429800	8569600	4895600	4498700	4505000	0	6082100	0	6438600
AT1G01370.2	AT1G01370.2	Histone superfamily protein ; Histone superfamily protein	0.359249	T	51	0	0.00676519	47.047	33.368	47.047	0	0	0	0	0	0	0	0	0	0	0	0	0	0	0	0	0	0	0	0
AT1G01370.2	AT1G01370.2	Histone superfamily protein ; Histone superfamily protein	0.359249	T	52	0	0.00676519	47.047	33.368	47.047	0	0	0	0	0	0	0	0	0	0	0	0	0	0	0	0	0	0	0	0
AT1G01440.1	AT1G01440.1	Protein of unknown function (DUF3133)	0.631141	S	30	4.45292	0.00115478	62.823	49.47	62.823	0	0	0	0	0	0	0	0	0	0	2932700	0	0	0	0	0	0	0	0	0
AT1G01440.1	AT1G01440.1	Protein of unknown function (DUF3133)	0.931631	S	33	11.3489	1.03215e-10	122.66	99.308	122.66	7851200	5475200	6013000	6517600	5331100	7951500	0	3890400	5362800	3349000	0	10748000	12567000	6181600	4116700	8972700	1745200	8444900	0	0
AT1G01440.1	AT1G01440.1	Protein of unknown function (DUF3133)	0.999739	S	427	35.858	2.77609e-05	81.632	70.844	59.607	459000	509290	256310	1180900	0	0	0	0	255970	415540	0	738270	0	679780	411280	1759900	0	512730	96121	417280
AT1G01440.1	AT1G01440.1	Protein of unknown function (DUF3133)	0.499787	T	32	0	2.67214e-07	103.97	83.275	103.97	0	0	0	0	0	0	0	0	0	0	0	0	0	0	0	0	0	0	0	0
AT1G01510.1	AT1G01510.1	NAD(P)-binding Rossmann-fold superfamily protein	0.999997	S	398	54.7948	1.22511e-63	212.32	204.51	181.96	38295000	35367000	30884000	63627000	38489000	52906000	34444000	24913000	33380000	28739000	16347000	60974000	56370000	34843000	31945000	35732000	10547000	46357000	9117500	32440000
AT1G01510.1	AT1G01510.1	NAD(P)-binding Rossmann-fold superfamily protein	0.592484	S	487	1.62729	1.43261e-06	111.39	96.702	83.729	0	0	3968100	6205900	3640200	4880800	0	1764600	0	0	1014600	0	0	0	2932100	4555400	0	5808100	1034900	0
AT1G01510.1	AT1G01510.1	NAD(P)-binding Rossmann-fold superfamily protein	0.834076	S	488	7.0234	1.43261e-06	111.39	96.702	85.837	0	2902700	3968100	6205900	3640200	4880800	0	1764600	0	0	1014600	5103400	5757900	0	2932100	4555400	0	0	1034900	0
AT1G01540.1	AT1G01540.1	Protein kinase superfamily protein ; Protein kinase superfamily protein	1	S	71	93.914	1.46818e-05	120.39	109.75	120.39	6754700	4323800	4498200	12381000	6830300	10679000	4297900	2469200	5378500	0	3434000	7619300	0	4903200	4622200	988570	1847000	6660400	1760900	5881200
AT1G01540.1	AT1G01540.1	Protein kinase superfamily protein ; Protein kinase superfamily protein	1	T	67	77.4752	4.20596e-13	146.2	121.78	120.39	15335000	9514700	9001800	23649000	16784000	21057000	9911400	5538500	11085000	6060800	9058900	15314000	8552100	9927000	8915000	5630000	4668000	15552000	4190400	13662000
AT1G01550.2	AT1G01550.2	Protein of unknown function (DUF793) ; Protein of unknown function (DUF793)	0.772069	S	337	5.9001	0.00299878	55.401	45.029	55.401	4565900	1855000	0	3972500	2823800	3335800	0	0	4042400	1962700	1785100	5208200	0	2781500	0	3189800	995330	0	1358400	0
AT1G01550.2	AT1G01550.2	Protein of unknown function (DUF793) ; Protein of unknown function (DUF793)	0.452549	T	336	0	0.00721511	51.841	39.628	48.004	0	0	0	0	0	0	0	0	0	0	0	0	0	0	0	0	0	0	0	0
AT1G01780.1	AT1G01780.1	GATA type zinc finger transcription factor family protein	0.854707	S	180	7.87669	5.55886e-22	157.73	131.91	157.73	0	18252000	0	0	0	5296500	0	0	0	0	0	0	0	0	4062900	0	2235400	0	0	0
AT1G01780.1	AT1G01780.1	GATA type zinc finger transcription factor family protein	0.596393	T	178	1.76115	3.00963e-15	146.64	112.54	146.64	0	0	0	0	0	0	13819000	0	0	0	0	0	0	0	0	0	0	0	0	0
AT1G01780.1	AT1G01780.1	GATA type zinc finger transcription factor family protein	0.419198	T	183	1.59429	0.000824122	60.943	40.968	59.282	0	0	0	0	0	0	0	0	0	0	0	0	0	0	0	0	0	0	0	0
AT1G01790.1	AT1G01790.1	K+ efflux antiporter 1	0.974168	S	120	15.91	9.60874e-49	206.62	172.83	155.79	13995000	18083000	7907900	16951000	16293000	17000000	12939000	7350400	11306000	11622000	8604100	18048000	14688000	11830000	8115800	11658000	2785800	11117000	4688000	9966300
AT1G01960.1	AT1G01960.1	SEC7-like guanine nucleotide exchange family protein	0.461591	S	994	0	0.00107501	42.828	26.027	42.828	0	0	0	0	0	0	0	0	0	0	0	0	0	0	0	0	0	0	0	0
AT1G01960.1	AT1G01960.1	SEC7-like guanine nucleotide exchange family protein	0.461591	S	997	0	0.00107501	42.828	26.027	42.828	0	0	0	0	0	0	0	0	0	0	0	0	0	0	0	0	0	0	0	0
AT1G01960.1	AT1G01960.1	SEC7-like guanine nucleotide exchange family protein	0.478321	S	586	0	0.00110664	65.598	44.861	65.598	0	0	0	0	0	0	0	0	0	0	0	0	0	0	0	0	0	0	0	0
AT1G01960.1	AT1G01960.1	SEC7-like guanine nucleotide exchange family protein	0.999825	S	588	37.5951	0	457.31	416.79	385.99	160100000	141300000	96469000	152630000	129070000	197620000	142610000	78334000	92903000	88433000	71782000	128950000	120860000	114220000	79259000	108000000	38449000	93628000	42975000	72102000
AT1G01960.1	AT1G01960.1	SEC7-like guanine nucleotide exchange family protein	0.456173	S	590	0	0.00239629	55.789	46.073	55.789	0	0	0	0	0	0	0	0	0	0	0	0	0	0	0	0	0	0	0	0
AT1G01960.1	AT1G01960.1	SEC7-like guanine nucleotide exchange family protein	0.304852	S	594	0.993935	0.00154238	58.49	41.61	58.49	0	0	0	0	0	0	0	0	0	0	0	0	0	0	0	0	0	0	0	0
AT1G01960.1	AT1G01960.1	SEC7-like guanine nucleotide exchange family protein	1	S	1307	56.1392	0.0010586	60.301	44.437	56.139	4813900	0	0	0	2811300	0	3170300	0	3220900	3197500	2713100	4240800	4039400	3926500	2718500	5020900	0	0	0	6057000
AT1G02080.2	AT1G02080.2	transcription regulators ; transcription regulators	1	S	923	86.7419	2.98608e-06	119.56	104.59	119.56	0	249530	278620	1609400	947600	484370	0	238900	0	0	0	855790	705390	0	0	1791100	0	657200	0	332660
AT1G02080.2	AT1G02080.2	transcription regulators ; transcription regulators	0.985357	S	1204	18.6111	0.00012693	77.894	61.772	74.732	2176400	1677700	2302300	2727200	2087900	2870800	1518800	1229200	0	1630300	1217500	0	2803900	1802500	1933800	2141900	553520	0	441350	1747000
AT1G02080.2	AT1G02080.2	transcription regulators ; transcription regulators	0.319602	S	1785	0	0.00873423	47.532	24.156	47.532	0	0	0	0	0	0	0	0	0	0	0	0	0	0	0	0	0	0	0	0
AT1G02080.2	AT1G02080.2	transcription regulators ; transcription regulators	0.319602	S	1787	0	0.00873423	47.532	24.156	47.532	0	0	0	0	0	0	0	0	0	0	0	0	0	0	0	0	0	0	0	0
AT1G02080.2	AT1G02080.2	transcription regulators ; transcription regulators	0.319602	S	1788	0	0.00873423	47.532	24.156	47.532	0	0	0	0	0	0	0	0	0	0	0	0	0	0	0	0	0	0	0	0
AT1G02120.1	AT1G02120.1	GRAM domain family protein	0.998083	S	42	28.3308	0.000516797	67.563	51.679	63.869	7990100	4240300	0	4644700	0	7115200	3781400	0	8605500	2357100	0	8050600	18174000	7796800	0	8938000	3665600	9981500	0	0
AT1G02120.1	AT1G02120.1	GRAM domain family protein	0.911738	S	32	13.1513	3.37955e-06	106.38	80.253	106.38	0	0	6937800	0	0	0	0	0	0	0	0	0	0	0	0	0	0	0	0	0
AT1G02120.1	AT1G02120.1	GRAM domain family protein	0.869363	S	37	8.36999	9.0985e-15	152.25	108.25	56.482	0	10214000	8726500	5833100	4335000	0	14345000	0	8180200	11256000	0	10374000	10436000	12104000	13587000	0	0	12375000	0	0
AT1G02120.1	AT1G02120.1	GRAM domain family protein	0.499999	S	38	0	9.0985e-15	152.25	108.25	137.73	0	10214000	8726500	0	0	0	14345000	0	8180200	11256000	0	10374000	10436000	12104000	13587000	0	0	12375000	0	0
AT1G02300.1	AT1G02300.1	Cysteine proteinases superfamily protein	0.99999	S	353	50.0091	0.00249252	51.726	18.041	51.726	0	0	0	0	0	17036000	0	0	11731000	0	10136000	0	0	0	12820000	0	0	0	0	9610600
AT1G02300.1	AT1G02300.1	Cysteine proteinases superfamily protein	0.999989	S	360	49.6266	0.00249252	51.726	18.041	51.726	0	0	0	0	0	17036000	0	0	11731000	0	10136000	0	0	0	12820000	0	0	0	0	9610600
AT1G02500.2;AT3G17390.1;AT4G01850.2	AT1G02500.2	S-adenosylmethionine synthetase 1 ; S-adenosylmethionine synthetase 1 ; S-adenosylmethionine synthetase family protein ; S-adenosylmethionine synthetase 2 ; S-adenosylmethionine synthetase 2	0.999991	S	235	50.2836	0.00502798	50.284	32.419	50.284	6563800	0	0	0	3001800	4899700	5264500	2358800	0	2616700	2718000	4546700	3131600	4100500	0	0	0	4524800	0	3658700
AT1G02500.2;AT4G01850.2	AT1G02500.2	S-adenosylmethionine synthetase 1 ; S-adenosylmethionine synthetase 1 ; S-adenosylmethionine synthetase 2 ; S-adenosylmethionine synthetase 2	0.999996	S	100	53.7022	2.0807e-07	101.45	87.055	101.45	0	2452600	0	16881000	8595400	0	6644500	3349300	4938200	3671600	7891700	8610500	7621400	5860900	0	8848100	0	7979400	0	5910200
AT1G02520.1	AT1G02520.1	P-glycoprotein 11	0.675879	S	632	5.8779	0.00160518	63.32	50.365	51.495	0	0	0	0	0	0	0	0	0	0	14500000	0	0	0	0	0	0	0	0	0
AT1G02520.1	AT1G02520.1	P-glycoprotein 11	0.593128	S	634	0	6.30939e-13	142.58	114.61	66.893	16647000	12792000	0	0	0	22718000	0	12999000	0	0	14500000	0	0	0	0	15465000	0	0	0	0
AT1G02520.1	AT1G02520.1	P-glycoprotein 11	0.755182	S	635	4.86127	6.30939e-13	142.58	114.61	111.73	16647000	12792000	0	0	0	22718000	0	12999000	0	0	0	0	20707000	0	0	15465000	0	0	0	0
AT1G02520.1	AT1G02520.1	P-glycoprotein 11	0.999894	S	639	37.1883	6.30939e-13	142.58	114.61	142.58	16647000	12792000	17544000	0	14855000	22718000	13319000	12999000	15706000	0	0	22015000	20707000	16356000	10413000	15465000	3702500	0	3244900	10607000
AT1G02840.3	AT1G02840.3	RNA-binding (RRM/RBD/RNP motifs) family protein ; RNA-binding (RRM/RBD/RNP motifs) family protein	0.999833	S	294	34.3002	0.00124204	62.162	39.688	62.162	0	0	1795600	0	0	0	2034900	1615000	0	0	0	2130400	0	591330	0	0	1947800	3216300	0	2350700
AT1G02840.3	AT1G02840.3	RNA-binding (RRM/RBD/RNP motifs) family protein ; RNA-binding (RRM/RBD/RNP motifs) family protein	0.790436	S	300	6.96583	0.00124204	62.162	39.688	62.162	3317900	0	6609500	0	0	4092900	0	0	0	0	2060500	0	0	4764100	0	0	0	0	0	0
AT1G02840.3	AT1G02840.3	RNA-binding (RRM/RBD/RNP motifs) family protein ; RNA-binding (RRM/RBD/RNP motifs) family protein	0.878825	S	290	8.78355	0.0190564	45.237	28.81	45.237	0	0	1795600	0	0	0	2034900	1615000	0	0	0	2130400	0	591330	0	0	1947800	3216300	0	2350700
AT1G02840.3	AT1G02840.3	RNA-binding (RRM/RBD/RNP motifs) family protein ; RNA-binding (RRM/RBD/RNP motifs) family protein	0.844338	S	271	7.21068	0.000172531	82.171	37.724	52.579	2431400	3435100	4173800	2080600	1425000	0	3705700	9089500	2207500	3061600	8206200	4398700	5079300	7078200	1676100	5572700	2680900	10760000	891410	20129000
AT1G02840.3	AT1G02840.3	RNA-binding (RRM/RBD/RNP motifs) family protein ; RNA-binding (RRM/RBD/RNP motifs) family protein	0.974938	S	273	16.0512	1.31219e-07	111.94	68.628	98.902	6943000	9156800	14591000	5370200	5770500	8813700	10344000	9089500	7673500	9847400	8206200	12365000	17423000	20670000	4725700	17087000	10706000	33014000	2997500	6701300
AT1G02840.3	AT1G02840.3	RNA-binding (RRM/RBD/RNP motifs) family protein ; RNA-binding (RRM/RBD/RNP motifs) family protein	0.724186	S	269	2.18469	0.0138167	49.12	26.587	42.209	0	0	0	0	0	0	0	0	0	0	0	0	5079300	0	0	0	0	10760000	0	0
AT1G02840.3	AT1G02840.3	RNA-binding (RRM/RBD/RNP motifs) family protein ; RNA-binding (RRM/RBD/RNP motifs) family protein ; RNA-binding (RRM/RBD/RNP motifs) family protein	0.436297	S	129	0	6.76207e-05	99.796	83.266	99.796	0	0	0	0	0	0	0	0	0	0	0	0	0	0	0	0	0	0	0	0
AT1G02840.3	AT1G02840.3	RNA-binding (RRM/RBD/RNP motifs) family protein ; RNA-binding (RRM/RBD/RNP motifs) family protein ; RNA-binding (RRM/RBD/RNP motifs) family protein	0.735551	S	131	7.45388	6.76207e-05	99.796	83.266	66.285	0	0	0	1815400	0	0	0	0	0	0	0	0	0	0	0	0	0	0	0	0
AT1G02840.3	AT1G02840.3	RNA-binding (RRM/RBD/RNP motifs) family protein ; RNA-binding (RRM/RBD/RNP motifs) family protein	0.432578	T	298	0	0.00209376	62.162	39.688	62.162	0	0	0	0	0	0	0	0	0	0	0	0	0	0	0	0	0	0	0	0
AT1G02870.1	AT1G02870.1	FUNCTIONS IN: molecular_function unknown; INVOLVED IN: biological_process unknown; EXPRESSED IN: 23 plant structures; EXPRESSED DURING: 13 growth stages; CONTAINS InterPro DOMAIN/s: Ribosome biogenesis protein Nop16 (InterPro:IPR019002); Has 104 Blast hit	1	S	108	171.846	2.51706e-27	172.57	156.08	171.85	6514100	3702800	9273600	140900000	107720000	95173000	5814200	5777200	7121800	4869300	6580100	11564000	9284700	8963700	5328400	102650000	5097400	16623000	2034700	10402000
AT1G02870.1	AT1G02870.1	FUNCTIONS IN: molecular_function unknown; INVOLVED IN: biological_process unknown; EXPRESSED IN: 23 plant structures; EXPRESSED DURING: 13 growth stages; CONTAINS InterPro DOMAIN/s: Ribosome biogenesis protein Nop16 (InterPro:IPR019002); Has 104 Blast hit	1	S	110	171.846	1.35929e-27	177.04	153.2	171.85	3719500	1796400	5419200	136700000	101750000	88692000	3902300	5093400	3382100	4850200	3949300	6041700	4891400	8497900	1987300	99611000	3959100	11002000	2674600	4765000
AT1G02990.1	AT1G02990.1	BEST Arabidopsis thaliana protein match is: CW-type Zinc Finger (TAIR:AT3G62900.1); Has 5847 Blast hits to 4410 proteins in 438 species: Archae - 17; Bacteria - 452; Metazoa - 2463; Fungi - 354; Plants - 306; Viruses - 11; Other Eukaryotes - 2244 (source:	0.982593	S	206	17.5244	0.00106857	62.14	46.601	62.14	0	0	703480	1427800	1062900	680920	0	98017	224620	0	813900	644640	1631300	1310300	311730	1986800	0	752050	0	498310
AT1G03060.1	AT1G03060.1	Beige/BEACH domain ;WD domain, G-beta repeat protein	0.46777	S	1961	0	0.00145359	49.888	38.885	45.125	0	0	0	0	0	0	0	0	0	0	0	0	0	0	0	0	0	0	0	0
AT1G03060.1	AT1G03060.1	Beige/BEACH domain ;WD domain, G-beta repeat protein	0.46777	S	1963	0	0.00145359	49.888	38.885	45.125	0	0	0	0	0	0	0	0	0	0	0	0	0	0	0	0	0	0	0	0
AT1G03060.1	AT1G03060.1	Beige/BEACH domain ;WD domain, G-beta repeat protein	0.923926	S	2709	16.2858	0.00980773	42.708	34.811	42.708	0	0	0	0	0	0	0	5360600	0	0	0	0	0	0	0	0	0	0	0	0
AT1G03060.1	AT1G03060.1	Beige/BEACH domain ;WD domain, G-beta repeat protein	0.448353	S	2720	0	0.000460564	64.845	51.525	64.845	0	0	0	0	0	0	0	0	0	0	0	0	0	0	0	0	0	0	0	0
AT1G03060.1	AT1G03060.1	Beige/BEACH domain ;WD domain, G-beta repeat protein	0.464254	S	2724	3.04296	0.000460564	64.845	51.525	57.21	0	0	0	0	0	0	0	0	0	0	0	0	0	0	0	0	0	0	0	0
AT1G03060.1	AT1G03060.1	Beige/BEACH domain ;WD domain, G-beta repeat protein	0.359786	T	2713	0.417288	0.00980773	42.708	34.811	40.625	0	0	0	0	0	0	0	0	0	0	0	0	0	0	0	0	0	0	0	0
AT1G03060.1	AT1G03060.1	Beige/BEACH domain ;WD domain, G-beta repeat protein	0.339429	T	2715	0.417288	0.0162957	40.625	28.318	40.625	0	0	0	0	0	0	0	0	0	0	0	0	0	0	0	0	0	0	0	0
AT1G03060.1	AT1G03060.1	Beige/BEACH domain ;WD domain, G-beta repeat protein	0.474756	T	2722	2.26349	0.000460564	64.845	51.525	64.845	0	0	0	0	0	0	0	0	0	0	0	0	0	0	0	0	0	0	0	0
AT1G03150.1	AT1G03150.1	Acyl-CoA N-acyltransferases (NAT) superfamily protein	1	T	167	76.7406	2.80922e-06	103.91	88.02	83.045	5664800	4845800	5027200	9259700	6197700	4981200	4891300	3202500	4094100	5021500	4505500	6882400	6146300	5410600	4828000	6543200	2233100	6679900	2307800	4208500
AT1G03350.1	AT1G03350.1	BSD domain-containing protein	0.91845	S	341	10.5163	0.00153621	63.894	22.493	63.894	0	0	0	0	0	0	0	0	0	0	0	0	0	0	0	0	0	0	0	0
AT1G03350.1	AT1G03350.1	BSD domain-containing protein	0.998349	S	127	25.5084	1.38834e-24	155.05	121.6	116.09	9746100	12787000	4741700	10422000	9162400	8545300	13084000	3566900	9158300	6850300	3579000	0	12434000	9761900	7173300	12436000	0	12787000	2106700	7384400
AT1G03350.1	AT1G03350.1	BSD domain-containing protein	0.698024	S	129	3.58103	1.38834e-24	155.05	121.6	155.05	4368200	6364700	0	10422000	9162400	8545300	5324700	0	2882400	0	0	0	6120500	4184600	7173300	7710200	0	7640500	530120	3194400
AT1G03350.1	AT1G03350.1	BSD domain-containing protein	0.654102	S	130	0	0.000300356	64.522	60.781	59.574	4368200	6364700	0	10422000	9162400	8545300	5324700	0	2882400	0	0	0	6120500	4184600	7173300	7710200	0	7640500	530120	3194400
AT1G03350.1	AT1G03350.1	BSD domain-containing protein	0.997569	S	64	26.1971	0.000823947	59.426	32.097	59.426	3915700	3289700	3760600	4046800	4055100	0	2726000	0	0	0	2553400	0	0	0	1943900	0	0	3641900	0	3996800
AT1G03350.1	AT1G03350.1	BSD domain-containing protein	0.561487	S	431	1.07357	0.00310978	61.235	36.312	61.235	0	0	0	0	0	0	0	0	0	0	74622000	0	0	0	0	0	0	0	82186000	0
AT1G03350.1	AT1G03350.1	BSD domain-containing protein	0.999695	S	434	35.1599	0.000148848	84.718	53.345	42.568	103530000	64965000	120810000	78953000	58722000	83093000	70944000	82980000	81578000	57005000	0	82631000	63364000	78578000	88759000	106330000	57987000	91950000	0	95600000
AT1G03350.1	AT1G03350.1	BSD domain-containing protein	0.31406	S	19	0	7.15852e-06	94.122	80.985	94.122	0	0	0	0	0	0	0	0	0	0	0	0	0	0	0	0	0	0	0	0
AT1G03350.1	AT1G03350.1	BSD domain-containing protein	0.31406	S	21	0	7.15852e-06	94.122	80.985	94.122	0	0	0	0	0	0	0	0	0	0	0	0	0	0	0	0	0	0	0	0
AT1G03350.1	AT1G03350.1	BSD domain-containing protein	0.31406	S	23	0	7.15852e-06	94.122	80.985	94.122	0	0	0	0	0	0	0	0	0	0	0	0	0	0	0	0	0	0	0	0
AT1G03350.1	AT1G03350.1	BSD domain-containing protein	0.99999	T	339	49.8232	2.91732e-65	211.9	109.03	147.1	0	5502000	10599000	15049000	7581900	17465000	12048000	11289000	15245000	5142800	11134000	10306000	13085000	15280000	7929800	13679000	3228100	20463000	6809500	0
AT1G03350.1	AT1G03350.1	BSD domain-containing protein	0.25	T	17	0	3.15937e-05	86.772	74.212	86.772	0	0	0	0	0	0	0	0	0	0	0	0	0	0	0	0	0	0	0	0
AT1G03370.1	AT1G03370.1	C2 calcium/lipid-binding and GRAM domain containing protein	0.5	S	835	0	0.00691165	50.207	35.517	50.207	0	0	0	0	0	0	1533000	344060	469170	823600	0	0	787650	700630	1121200	3824400	303480	0	247050	631350
AT1G03370.1	AT1G03370.1	C2 calcium/lipid-binding and GRAM domain containing protein	0.5	S	838	0	0.00691165	50.207	35.517	50.207	0	0	0	0	0	0	1533000	344060	469170	823600	0	0	787650	700630	1121200	3824400	303480	0	247050	631350
AT1G03530.1	AT1G03530.1	nuclear assembly factor 1	0.951913	S	175	12.9723	0.00372294	53.448	39.311	53.448	2643000	1602600	3374400	4601500	3097800	3849200	1245300	1382100	2320000	1537400	1318100	3517900	4544300	2772300	2420000	3456100	1264600	5393600	885410	3492700
AT1G03530.1	AT1G03530.1	nuclear assembly factor 1	1	S	494	189.939	5.39974e-116	224.59	206.79	224.59	0	0	0	0	0	0	0	0	0	0	0	0	0	0	0	0	0	0	0	0
AT1G03530.1	AT1G03530.1	nuclear assembly factor 1	1	S	235	93.0399	7.69827e-09	137.3	105.59	114.25	10965000	4778500	9517700	7347900	6993500	17550000	0	6275400	9019200	3995800	3725000	12015000	25074000	10531000	4648800	14441000	2984500	16293000	2451800	0
AT1G03590.1	AT1G03590.1	Protein phosphatase 2C family protein ; Protein phosphatase 2C family protein ; Protein phosphatase 2C family protein	1	S	448	61.6499	0.000691535	61.65	43.614	61.65	10385000	0	0	0	0	12184000	6106900	0	8948400	5132300	5846900	10599000	0	0	5678800	0	2754500	9797500	2132400	7139000
AT1G03770.1	AT1G03770.1	RING 1B ; RING 1B ; RING 1B	0.971419	S	242	15.3133	8.58174e-15	154.46	134.79	120.63	5352400	2985400	3517600	7146300	5725900	5495800	2794400	2125800	3421800	2548000	1710200	5904800	6527500	4546100	4194400	4375900	1584900	4491100	1303100	4372300
AT1G03770.1	AT1G03770.1	RING 1B ; RING 1B ; RING 1B	0.5	T	241	0	3.70231e-05	108.34	98.379	108.34	0	0	0	0	0	0	0	0	0	0	0	0	0	4546100	0	0	0	0	0	0
AT1G03910.1	AT1G03910.1	EXPRESSED IN: 25 plant structures; EXPRESSED DURING: 13 growth stages; CONTAINS InterPro DOMAIN/s: Cactin protein, cactus-binding domain, C-terminal (InterPro:IPR019134), Cactin, central region (InterPro:IPR018816); BEST Arabidopsis thaliana protein match	1	S	406	82.334	0	394.57	375.27	85.387	140960000	74290000	84038000	188990000	162280000	101500000	102730000	46135000	123020000	108070000	81479000	137280000	150620000	113150000	89582000	110630000	30080000	126710000	31071000	108160000
AT1G04050.1	AT1G04050.1	homolog of SU(var)3-9 1	0.5	S	62	0	0.000173817	76.391	67.355	45.864	1171600	759250	0	4372100	3400600	4258700	1637400	830370	1201000	1312100	0	2193700	1946400	1952700	0	2535600	0	2661100	186720	0
AT1G04050.1	AT1G04050.1	homolog of SU(var)3-9 1	0.5	T	63	0	0.000173817	76.391	67.355	45.864	1171600	759250	0	4372100	3400600	4258700	1637400	830370	1201000	1312100	0	2193700	1946400	1952700	0	2535600	0	2661100	186720	0
AT1G04080.2	AT1G04080.2	Tetratricopeptide repeat (TPR)-like superfamily protein ; Tetratricopeptide repeat (TPR)-like superfamily protein ; Tetratricopeptide repeat (TPR)-like superfamily protein	0.473188	S	114	0	1.3401e-08	110.4	97.286	110.4	0	0	0	0	0	0	0	0	0	0	0	0	0	0	0	0	0	0	0	0
AT1G04080.2	AT1G04080.2	Tetratricopeptide repeat (TPR)-like superfamily protein ; Tetratricopeptide repeat (TPR)-like superfamily protein ; Tetratricopeptide repeat (TPR)-like superfamily protein	0.999999	S	118	61.3557	5.00388e-121	252.47	238.66	252.47	246180000	270310000	223790000	395310000	297680000	419590000	192970000	162190000	202900000	221020000	172880000	335640000	359360000	236010000	223560000	274410000	91756000	304850000	99914000	238500000
AT1G04080.2	AT1G04080.2	Tetratricopeptide repeat (TPR)-like superfamily protein ; Tetratricopeptide repeat (TPR)-like superfamily protein ; Tetratricopeptide repeat (TPR)-like superfamily protein	0.298064	S	123	0.207171	2.44219e-07	93.093	78.241	93.093	0	0	0	0	0	0	0	0	0	0	0	0	0	0	0	0	0	0	0	0
AT1G04080.2	AT1G04080.2	Tetratricopeptide repeat (TPR)-like superfamily protein ; Tetratricopeptide repeat (TPR)-like superfamily protein ; Tetratricopeptide repeat (TPR)-like superfamily protein	0.473188	T	115	0	4.80635e-13	123.2	96.782	110.4	0	0	0	0	0	0	0	0	0	0	0	0	0	0	0	0	0	0	0	0
AT1G04120.2	AT1G04120.2	multidrug resistance-associated protein 5 ; multidrug resistance-associated protein 5	0.958185	S	898	13.6011	2.51051e-14	139.74	104.94	119.25	13979000	7588100	11613000	12912000	0	12419000	0	7046800	7980900	6790600	7170800	11623000	11238000	12376000	8595300	12824000	5226700	15732000	5906300	10830000
AT1G04120.2	AT1G04120.2	multidrug resistance-associated protein 5 ; multidrug resistance-associated protein 5	0.639646	S	900	2.49211	0.000449331	83.182	56.798	83.182	0	0	0	0	8130900	0	9539100	0	0	0	0	0	0	0	0	0	0	0	0	0
AT1G04120.2	AT1G04120.2	multidrug resistance-associated protein 5 ; multidrug resistance-associated protein 5	0.333333	S	208	0	2.42697e-07	120.63	105.7	120.63	0	0	0	0	0	0	0	0	0	0	0	0	0	0	0	0	0	0	0	0
AT1G04120.2	AT1G04120.2	multidrug resistance-associated protein 5 ; multidrug resistance-associated protein 5	0.333333	S	209	0	2.42697e-07	120.63	105.7	120.63	0	0	0	0	0	0	0	0	0	0	0	0	0	0	0	0	0	0	0	0
AT1G04120.2	AT1G04120.2	multidrug resistance-associated protein 5 ; multidrug resistance-associated protein 5	0.333333	S	210	0	2.42697e-07	120.63	105.7	120.63	0	0	0	0	0	0	0	0	0	0	0	0	0	0	0	0	0	0	0	0
AT1G04140.1	AT1G04140.1	Transducin family protein / WD-40 repeat family protein ; Transducin family protein / WD-40 repeat family protein	0.819289	S	11	6.56454	8.24651e-09	125.82	95.275	125.82	0	2534400	0	1432700	1860600	4883100	1633400	0	0	3225900	596830	0	5459900	1728000	1239900	0	1489300	3182900	1628900	4335600
AT1G04140.1	AT1G04140.1	Transducin family protein / WD-40 repeat family protein ; Transducin family protein / WD-40 repeat family protein	0.937577	S	12	11.7666	7.10432e-51	207.64	145.56	207.64	0	2534400	0	1432700	1860600	0	1633400	0	3237600	3225900	1941500	3785500	5459900	1814600	1239900	13959000	0	3182900	1628900	0
AT1G04400.2	AT1G04400.2	cryptochrome 2 ; cryptochrome 2	0.791396	S	605	8.91107	0.000175356	73.927	58.54	68.809	2376300	2843400	1562900	2243800	2393700	3198500	3101800	1009200	3485500	2089200	1983100	0	2901900	1772300	2064700	0	918260	3037000	0	2910300
AT1G04410.1	AT1G04410.1	Lactate/malate dehydrogenase family protein	0.629317	S	204	2.33566	0.000479869	72.652	38.692	69.721	2345800	0	2441500	0	0	1199700	2470400	0	0	1810700	2271600	0	0	0	0	0	1433200	1203000	0	3576200
AT1G04410.1	AT1G04410.1	Lactate/malate dehydrogenase family protein	0.862255	S	205	8.08089	0.000944466	70.488	36.528	70.488	0	0	0	0	1008800	0	0	1381000	0	0	0	2168000	0	0	2455000	0	0	0	3192800	0
AT1G04440.1	AT1G04440.1	casein kinase like 13 ; casein kinase I-like 8	0.709021	S	405	3.90143	0.000413229	71.153	30.159	71.153	10174000	8535900	0	0	0	0	0	0	0	0	0	0	0	0	0	0	0	0	0	0
AT1G04440.1	AT1G04440.1	casein kinase like 13 ; casein kinase I-like 8	0.894585	S	406	9.33176	8.30711e-06	96.604	64.19	79.82	0	0	8105700	12746000	10668000	12743000	7103300	3736100	9047700	6695200	5181800	11463000	8550300	7722100	10211000	8912600	4517600	9104800	4673400	6751500
AT1G04530.1	AT1G04530.1	Tetratricopeptide repeat (TPR)-like superfamily protein	0.997334	T	36	25.7405	6.41641e-06	114.63	103.52	62.378	930890	694060	1080300	1341100	2138400	991910	1192500	0	901630	0	1187500	1930900	968460	1047600	1108200	4780600	328020	961200	167920	682230
AT1G04780.1	AT1G04780.1	Ankyrin repeat family protein	0.637948	S	575	3.36619	1.10951e-41	182.39	160.38	182.39	3681200	275820	0	8234200	0	1009400	0	2342300	0	1894400	0	8028800	6058900	4202400	0	5533700	368330	0	287200	0
AT1G04780.1	AT1G04780.1	Ankyrin repeat family protein	0.742502	S	576	6.86868	2.26439e-14	133.09	121.47	133.09	0	0	0	0	0	7132000	0	0	0	0	0	0	0	0	0	0	0	0	0	0
AT1G04780.1	AT1G04780.1	Ankyrin repeat family protein	1	S	356	77.2534	2.08981e-17	119.77	87.15	119.77	0	5066100	10238000	7669300	4106800	10141000	0	0	1474600	0	0	0	0	0	0	0	0	0	3235400	6681900
AT1G04780.1	AT1G04780.1	Ankyrin repeat family protein	0.968813	S	584	14.97	5.41024e-08	110.62	87.443	110.62	396410	426140	380010	0	2112400	2771100	1576200	553980	663850	0	519390	1832100	1781900	1427100	1279800	11113000	192390	0	140650	729500
AT1G04780.1	AT1G04780.1	Ankyrin repeat family protein	0.223305	S	591	0	0.00251647	48.656	40.958	48.656	0	0	0	0	0	0	0	0	0	0	0	0	0	0	0	0	0	0	0	0
AT1G04780.1	AT1G04780.1	Ankyrin repeat family protein	0.223305	S	592	0	0.00251647	48.656	40.958	48.656	0	0	0	0	0	0	0	0	0	0	0	0	0	0	0	0	0	0	0	0
AT1G04780.1	AT1G04780.1	Ankyrin repeat family protein	0.98209	S	607	18.9825	0.00408094	65.231	39.912	65.231	5615800	7852100	4933400	12075000	0	9820100	6473200	4367400	9237400	5340400	6148000	9972600	10221000	9808900	7555100	8015900	0	7215000	0	3189600
AT1G04780.1	AT1G04780.1	Ankyrin repeat family protein	0.98788	S	435	19.112	1.29997e-38	182.35	143.8	122.5	39806000	26452000	31379000	42770000	27202000	45731000	22043000	25374000	29901000	19816000	22528000	48910000	32553000	31499000	24432000	41765000	11679000	32544000	11695000	31188000
AT1G04780.1	AT1G04780.1	Ankyrin repeat family protein	0.999898	T	572	39.056	1.10951e-41	182.39	160.38	115.76	3681200	2911500	4260800	8234200	8242900	7132000	5475800	2342300	3743000	1894400	3822300	8028800	6058900	4202400	3924100	5533700	368330	6007500	287200	3319100
AT1G04930.1	AT1G04930.1	hydroxyproline-rich glycoprotein family protein ; hydroxyproline-rich glycoprotein family protein	0.989958	S	273	25.9587	0.000105715	54.011	46.012	43.831	0	4772200	3963900	9086800	7272400	0	4742000	2542000	5800000	4434200	0	6395500	0	4572600	0	4406100	2001600	9194000	1041800	0
AT1G04950.3	AT1G04950.3	TATA BOX ASSOCIATED FACTOR II 59 ; TATA BOX ASSOCIATED FACTOR II 59 ; TATA BOX ASSOCIATED FACTOR II 59	1	S	434	96.0228	5.07152e-133	273.02	241.67	273.02	38322000	28507000	31050000	47814000	39927000	40927000	31169000	20535000	34811000	24906000	19162000	45433000	36919000	36957000	29049000	41034000	13430000	46221000	13488000	34723000
AT1G04990.2	AT1G04990.2	Zinc finger C-x8-C-x5-C-x3-H type family protein ; Zinc finger C-x8-C-x5-C-x3-H type family protein	0.790973	S	403	5.77999	1.22899e-05	96.487	83.069	96.487	4017800	5427600	6877600	0	0	0	0	3769700	3751800	0	9909800	6448200	0	0	10406000	0	1614400	8711500	0	0
AT1G05150.1	AT1G05150.1	Calcium-binding tetratricopeptide family protein	0.439229	S	565	0.163144	0.0135433	48.477	35.049	45.257	0	0	0	0	0	0	0	0	0	0	0	0	0	0	0	0	0	0	0	0
AT1G05150.1	AT1G05150.1	Calcium-binding tetratricopeptide family protein	0.934968	S	567	13.0832	9.55221e-09	128.64	118.58	128.64	30626000	24352000	22715000	24053000	19329000	29879000	19139000	0	19504000	18443000	12507000	29115000	28936000	20006000	14840000	27443000	9300100	22900000	9154200	22904000
AT1G05350.1	AT1G05350.1	NAD(P)-binding Rossmann-fold superfamily protein	0.41786	S	407	0.787573	0.00749802	42.309	26.367	42.309	0	0	0	0	0	0	0	0	0	0	0	0	0	0	0	0	0	0	0	0
AT1G05350.1	AT1G05350.1	NAD(P)-binding Rossmann-fold superfamily protein	0.701657	S	409	6.50966	3.78571e-05	81.888	59.014	47.32	0	0	0	0	0	0	0	3828500	0	0	0	8837100	0	0	0	0	0	0	0	0
AT1G05350.1	AT1G05350.1	NAD(P)-binding Rossmann-fold superfamily protein	0.928349	T	412	12.3264	3.41703e-05	83.202	69.79	67.586	0	8437000	0	10667000	7671400	6311600	9704200	0	4055100	0	9267400	0	0	0	0	7217200	3005600	0	2151500	7601200
AT1G05380.2	AT1G05380.2	Acyl-CoA N-acyltransferase with RING/FYVE/PHD-type zinc finger protein ; Acyl-CoA N-acyltransferase with RING/FYVE/PHD-type zinc finger protein	0.943654	S	151	12.3118	0.00666853	54.343	28.906	54.343	353120000	0	172380000	0	294180000	0	254660000	143840000	0	236550000	0	0	0	145150000	0	277760000	0	0	156910000	235680000
AT1G05380.2	AT1G05380.2	Acyl-CoA N-acyltransferase with RING/FYVE/PHD-type zinc finger protein ; Acyl-CoA N-acyltransferase with RING/FYVE/PHD-type zinc finger protein	0.59384	S	156	1.76666	0.00666853	54.343	28.906	54.343	353120000	0	0	0	294180000	0	254660000	143840000	0	236550000	0	0	0	145150000	0	277760000	0	0	156910000	235680000
AT1G05380.2	AT1G05380.2	Acyl-CoA N-acyltransferase with RING/FYVE/PHD-type zinc finger protein ; Acyl-CoA N-acyltransferase with RING/FYVE/PHD-type zinc finger protein	0.485681	S	158	0	0.014071	47.198	29.061	47.198	0	0	0	0	0	0	0	0	0	0	0	0	0	0	0	0	0	0	0	0
AT1G05460.1	AT1G05460.1	P-loop containing nucleoside triphosphate hydrolases superfamily protein	0.999697	S	8	36.9502	2.67449e-09	106.93	91.039	106.93	0	11486000	0	0	0	0	11270000	0	0	2310000	0	0	0	15182000	1981000	0	0	0	0	0
AT1G05520.1	AT1G05520.1	Sec23/Sec24 protein transport family protein	1	S	238	67.4509	2.74657e-06	93.494	78.106	93.494	3058000	5542800	3456300	5509100	0	4194400	3906100	2613900	2240800	3507200	2939200	3364500	2803400	2246600	2935600	3348800	1398200	2915600	2466500	3902300
AT1G05805.1	AT1G05805.1	basic helix-loop-helix (bHLH) DNA-binding superfamily protein	0.882706	S	144	8.76956	8.03204e-06	109.48	94.787	70.41	1640500	851330	668520	1366700	904610	1265800	942740	790180	1033400	784020	571930	1559900	1618800	1127600	575040	3747800	377960	1373400	303340	1044800
AT1G05805.1	AT1G05805.1	basic helix-loop-helix (bHLH) DNA-binding superfamily protein	0.5	S	145	0	8.03204e-06	98.439	88.208	98.439	1640500	851330	668520	1366700	904610	1265800	942740	790180	1033400	784020	571930	1559900	1618800	1127600	575040	3747800	377960	1373400	303340	1044800
AT1G05805.1	AT1G05805.1	basic helix-loop-helix (bHLH) DNA-binding superfamily protein	0.999999	S	189	62.4449	1.47446e-63	219.41	186.97	219.41	32181000	30881000	24477000	62655000	32742000	32038000	28818000	18953000	21033000	21746000	19669000	32499000	36656000	36678000	28998000	32691000	10875000	31633000	13121000	29575000
AT1G05805.1	AT1G05805.1	basic helix-loop-helix (bHLH) DNA-binding superfamily protein	0.988378	S	28	21.4146	1.0971e-17	132.48	120.12	132.48	344320	0	415860	2862000	1842900	1506700	0	300450	448530	326170	705690	0	1729100	630870	1023600	0	98656	0	0	452550
AT1G05805.1	AT1G05805.1	basic helix-loop-helix (bHLH) DNA-binding superfamily protein	0.344727	S	32	0	0.00114146	50.053	38.613	50.053	0	0	0	0	0	0	0	0	0	0	0	0	0	0	0	0	0	0	0	0
AT1G05870.4	AT1G05870.4	Protein of unknown function (DUF1685) ; Protein of unknown function (DUF1685) ; Protein of unknown function (DUF1685) ; Protein of unknown function (DUF1685)	0.873965	S	83	8.41002	0.00778345	45.257	30.055	45.257	1577500	729820	1156700	2321700	1125800	1228200	1153500	354190	0	757310	432370	1191200	846770	1134500	577740	1574200	0	1559700	0	904950
AT1G05890.1	AT1G05890.1	RING/U-box superfamily protein ; RING/U-box superfamily protein	0.5	T	123	0	2.93227e-08	113.61	80.38	113.61	0	0	0	0	0	0	0	0	0	0	0	2443800	4090000	0	0	0	0	2996000	0	0
AT1G05890.1	AT1G05890.1	RING/U-box superfamily protein ; RING/U-box superfamily protein	0.874276	T	124	8.42232	4.26891e-13	148.03	99.368	148.03	2946100	1929900	2047300	4053700	2755600	3388000	2290600	2139000	3178500	3109100	1522400	2443800	4090000	2506000	2918000	3758900	1108300	2996000	796080	2250100
AT1G05910.1	AT1G05910.1	cell division cycle protein 48-related / CDC48-related	0.666667	S	292	0	0.000147479	83.499	71.186	83.499	0	0	0	0	0	0	0	0	0	0	0	0	0	0	907530	2088600	0	0	0	193140
AT1G05910.1	AT1G05910.1	cell division cycle protein 48-related / CDC48-related	0.666667	S	295	0	0.000147479	83.499	71.186	83.499	0	0	0	0	0	0	0	0	0	0	0	0	0	0	907530	2088600	0	0	0	193140
AT1G05910.1	AT1G05910.1	cell division cycle protein 48-related / CDC48-related	0.666667	T	289	0	0.000147479	83.499	71.186	83.499	0	0	0	0	0	0	0	0	0	0	0	0	0	0	907530	2088600	0	0	0	193140
AT1G06070.1	AT1G06070.1	Basic-leucine zipper (bZIP) transcription factor family protein	0.961332	S	410	14.7592	1.34576e-09	140.27	99.047	57.328	15250000	14675000	9587100	19038000	0	13499000	13327000	7558800	0	14524000	10986000	18907000	8018400	8710400	0	0	0	10491000	6575300	14783000
AT1G06070.1	AT1G06070.1	Basic-leucine zipper (bZIP) transcription factor family protein	0.63055	S	413	3.87648	6.10148e-08	127.32	82.866	53.363	0	8855600	0	0	0	0	0	0	0	0	0	0	0	0	0	0	0	0	0	0
AT1G06070.1	AT1G06070.1	Basic-leucine zipper (bZIP) transcription factor family protein	0.896437	T	412	9.80791	7.81884e-13	143.81	118.96	109.99	19527000	0	12420000	15564000	0	25389000	0	9124700	12500000	0	2467700	19878000	25848000	18813000	10872000	15929000	4286300	0	4184100	11090000
AT1G06190.1	AT1G06190.1	Rho termination factor	0.499998	S	400	0	3.39671e-21	158.11	144.43	139.48	0	336370	0	0	2781000	0	226610	0	0	1735200	0	0	0	0	2385300	6013800	0	2693300	0	0
AT1G06190.1	AT1G06190.1	Rho termination factor	0.499998	S	401	0	3.39671e-21	158.11	144.43	139.48	0	336370	0	0	2781000	0	226610	0	0	1735200	0	0	0	0	2385300	6013800	0	2693300	0	0
AT1G06210.1	AT1G06210.1	ENTH/VHS/GAT family protein	1	S	377	182.022	2.01774e-42	194.3	157.98	182.02	24656000	30855000	22215000	85362000	44396000	37314000	8954600	10772000	17621000	4296300	2512000	50640000	32238000	10319000	101170000	114080000	13678000	59779000	724350	29621000
AT1G06210.1	AT1G06210.1	ENTH/VHS/GAT family protein	1	S	378	182.022	6.1396e-33	182.02	151.47	182.02	8689200	12504000	5358800	57577000	28499000	58301000	31830000	10772000	6344800	17063000	12256000	27785000	32238000	30054000	92906000	89132000	769300	23797000	7924300	12818000
AT1G06220.2	AT1G06220.2	Ribosomal protein S5/Elongation factor G/III/V family protein ; Ribosomal protein S5/Elongation factor G/III/V family protein	0.999956	S	42	44.3704	8.66971e-23	108.13	103.51	108.13	0	0	0	14155000	10863000	16487000	10313000	0	0	0	0	15290000	0	0	0	0	0	0	200980	0
AT1G06230.3	AT1G06230.3	global transcription factor group E4 ; global transcription factor group E4 ; global transcription factor group E4	0.331321	S	188	0	0.000184452	70.26	58.989	70.26	0	0	0	0	0	0	0	0	0	0	0	0	0	0	0	0	0	0	0	0
AT1G06230.3	AT1G06230.3	global transcription factor group E4 ; global transcription factor group E4 ; global transcription factor group E4	0.994103	S	192	22.982	2.86841e-19	148.01	128.97	148.01	5501500	4109300	5070700	12348000	10883000	3240500	0	1999200	0	3257900	0	6531200	9519100	6023200	4214900	12686000	847200	7224300	0	4259100
AT1G06230.3	AT1G06230.3	global transcription factor group E4 ; global transcription factor group E4 ; global transcription factor group E4	1	S	209	101.382	3.99862e-07	101.38	88.345	101.38	946890	646650	0	2948400	3393700	3935300	1115100	0	863690	0	0	1762400	1739800	1333000	1999400	8896600	0	1859400	0	836770
AT1G06230.3	AT1G06230.3	global transcription factor group E4 ; global transcription factor group E4 ; global transcription factor group E4	1	S	210	101.382	3.99862e-07	101.38	88.345	101.38	946890	646650	0	2948400	3393700	3935300	1115100	0	863690	0	0	1762400	1739800	1333000	1999400	8896600	0	1859400	0	836770
AT1G06230.3	AT1G06230.3	global transcription factor group E4 ; global transcription factor group E4 ; global transcription factor group E4	0.485217	T	190	0	4.2537e-05	88.768	73.606	88.768	0	0	0	0	0	0	0	0	0	0	0	0	0	0	0	0	0	0	0	0
AT1G06410.1	AT1G06410.1	trehalose-phosphatase/synthase 7	0.998202	S	5	27.4441	6.18944e-287	353	319.2	317.03	11373000	8312300	9034600	68647000	42717000	15872000	21590000	7686000	8991500	16447000	14201000	34287000	27330000	19676000	15209000	61292000	0	20784000	0	14617000
AT1G06410.1	AT1G06410.1	trehalose-phosphatase/synthase 7	0.371417	S	49	0	0.00195753	40.671	29.464	40.671	0	0	0	0	0	0	0	0	0	0	0	0	0	0	0	0	0	0	0	0
AT1G06410.1	AT1G06410.1	trehalose-phosphatase/synthase 7	0.371417	S	50	0	0.00195753	40.671	29.464	40.671	0	0	0	0	0	0	0	0	0	0	0	0	0	0	0	0	0	0	0	0
AT1G06410.1	AT1G06410.1	trehalose-phosphatase/synthase 7	0.839058	T	7	7.44646	2.36622e-10	140.46	119.04	57.499	0	0	0	1629500	0	0	0	7686000	0	0	0	0	0	0	0	0	0	0	0	0
AT1G06410.1	AT1G06410.1	trehalose-phosphatase/synthase 7	0.998547	T	32	28.7214	1.13713e-11	86.413	73.455	77.026	3511100	1433800	5508100	7317200	5863200	10933000	6541400	4478200	5130200	5165400	3964500	7390600	6920700	5118700	4803100	8862000	1438400	6509300	691620	4050800
AT1G06620.1	AT1G06620.1	2-oxoglutarate (2OG) and Fe(II)-dependent oxygenase superfamily protein	0.481893	S	51	0	2.11269e-06	82.177	69.12	82.177	0	0	0	0	0	0	0	0	0	0	0	0	0	0	0	0	0	0	0	0
AT1G06620.1	AT1G06620.1	2-oxoglutarate (2OG) and Fe(II)-dependent oxygenase superfamily protein	0.481893	T	50	0	2.11269e-06	82.177	69.12	82.177	0	0	0	0	0	0	0	0	0	0	0	0	0	0	0	0	0	0	0	0
AT1G06660.1	AT1G06660.1	unknown protein; BEST Arabidopsis thaliana protein match is: unknown protein (TAIR:AT2G30820.2); Has 166 Blast hits to 144 proteins in 35 species: Archae - 0; Bacteria - 17; Metazoa - 13; Fungi - 20; Plants - 104; Viruses - 0; Other Eukaryotes - 12 (sourc	0.911453	S	62	10.1388	0.0193903	40.577	27.596	40.577	783780	0	0	758300	0	1017300	523840	380880	704430	0	104330	0	0	0	564560	0	0	1008600	0	655650
AT1G06670.1	AT1G06670.1	nuclear DEIH-boxhelicase	1	S	1020	63.8248	6.22841e-43	192.85	174.35	189.64	0	32099000	42572000	70431000	60892000	80626000	42937000	18718000	43270000	35646000	28351000	63174000	0	47476000	20347000	24931000	6055000	45985000	0	31660000
AT1G06670.1	AT1G06670.1	nuclear DEIH-boxhelicase	0.768065	S	1197	5.26806	6.40669e-07	65.399	51.23	65.399	4506500	3074700	3956800	0	0	1707200	0	0	0	6340200	0	0	0	0	0	11571000	0	6213700	0	3042500
AT1G06850.2	AT1G06850.2	basic leucine-zipper 52 ; basic leucine-zipper 52	0.964846	S	117	17.3951	0.00199261	58.487	52.993	58.487	4185600	5212000	5514000	0	0	4716000	4771300	0	0	1798600	0	2979600	6453200	0	0	0	0	0	0	0
AT1G06890.3	AT1G06890.3	nodulin MtN21 /EamA-like transporter family protein ; nodulin MtN21 /EamA-like transporter family protein ; nodulin MtN21 /EamA-like transporter family protein	0.999999	S	334	58.5996	7.99553e-82	233.3	210.58	233.3	0	7556400	0	5996400	4529800	0	0	2629400	0	4883400	2404000	6367400	0	3284000	1440500	0	0	0	2284600	0
AT1G07000.1	AT1G07000.1	exocyst subunit exo70 family protein B2	0.953572	S	149	13.275	2.6084e-06	63.625	58.67	63.625	776970	2662000	514160	1718000	2052100	2813000	6283600	1007100	2723900	4628800	0	0	0	0	1169500	9978800	263150	1395700	2018100	4647200
AT1G07110.1	AT1G07110.1	fructose-2,6-bisphosphatase ; Plant transposase (Ptta/En/Spm family)	0.888643	S	244	9.1884	1.43064e-61	218.66	167.82	174.35	11716000	8210500	8348600	11819000	9415500	11185000	9004400	5635300	8805000	7245800	4552400	10589000	11232000	6829000	7171300	11857000	2685100	10684000	3189000	7139300
AT1G07110.1	AT1G07110.1	fructose-2,6-bisphosphatase	0.564302	S	218	1.33783	7.00127e-05	109.07	61.452	109.07	0	0	0	0	0	0	0	0	0	0	0	20146000	0	0	23828000	0	0	0	0	0
AT1G07110.1	AT1G07110.1	fructose-2,6-bisphosphatase	0.953043	S	220	13.6559	1.26406e-05	115.04	67.736	91.076	0	17523000	13638000	31616000	0	14346000	20617000	11207000	14317000	15409000	16718000	0	13695000	13926000	0	12184000	7767400	20171000	9618100	12224000
AT1G07110.1	AT1G07110.1	fructose-2,6-bisphosphatase	0.99998	S	303	47.132	4.91496e-66	210.64	176.76	210.64	8865700	9295400	8193200	35504000	12320000	27039000	19393000	8849300	13371000	27358000	13742000	28398000	28405000	15598000	11160000	57144000	9213400	27426000	3746200	22883000
AT1G07110.1	AT1G07110.1	fructose-2,6-bisphosphatase	1	S	276	82.3511	1.23938e-85	227.81	194.72	227.81	15721000	18192000	14562000	29878000	21075000	25568000	22721000	11822000	15217000	13240000	13326000	22138000	17030000	15393000	16905000	24829000	6807800	15611000	6641500	13470000
AT1G07705.1	AT1G07705.1	NOT2 / NOT3 / NOT5 family ; NOT2 / NOT3 / NOT5 family	0.497222	S	151	0	0.000814338	65.472	39.824	65.472	0	0	0	0	0	0	0	0	0	0	0	0	0	0	0	0	0	0	0	0
AT1G07705.1	AT1G07705.1	NOT2 / NOT3 / NOT5 family ; NOT2 / NOT3 / NOT5 family	0.497222	S	152	0	0.000814338	65.472	39.824	65.472	0	0	0	0	0	0	0	0	0	0	0	0	0	0	0	0	0	0	0	0
AT1G07930.2	AT1G07930.2	GTP binding Elongation factor Tu family protein ; GTP binding Elongation factor Tu family protein ; GTP binding Elongation factor Tu family protein ; GTP binding Elongation factor Tu family protein ; GTP binding Elongation factor Tu family protein ; GTP b	0.98553	T	316	18.3327	2.37172e-11	133.41	126.53	100.92	11478000	5535100	6718800	21910000	14189000	13693000	16016000	8557500	10992000	17570000	7664900	16365000	10967000	12215000	10513000	13365000	2071700	9055000	2565300	6383800
AT1G07970.1	AT1G07970.1	CONTAINS InterPro DOMAIN/s: Cytochrome B561-related, N-terminal (InterPro:IPR019176); Has 215 Blast hits to 213 proteins in 79 species: Archae - 0; Bacteria - 6; Metazoa - 131; Fungi - 22; Plants - 42; Viruses - 0; Other Eukaryotes - 14 (source: NCBI BLin	0.56243	T	691	1.09021	1.59883e-11	131.48	121.73	131.48	658930	638500	974700	4062700	2705400	2397300	1530400	494010	634020	772360	1324400	2949400	2827300	2211700	0	4131100	0	1971700	130840	1370100
AT1G07990.1	AT1G07990.1	SIT4 phosphatase-associated family protein	0.359327	Y	515	0.498839	3.24008e-06	72.532	65.339	72.532	0	0	0	0	0	0	0	0	0	0	0	0	0	0	0	0	0	0	0	0
AT1G07990.1	AT1G07990.1	SIT4 phosphatase-associated family protein	0.971447	S	7	15.5815	0.000233543	77.222	64.022	77.222	0	408790	345200	1461400	878650	586350	616630	0	0	390910	0	0	0	0	0	2278600	119240	0	0	298200
AT1G07990.1	AT1G07990.1	SIT4 phosphatase-associated family protein	0.99996	S	508	43.9503	5.11341e-87	235.29	220.47	235.29	6167800	6577300	7006900	37273000	23630000	11615000	22334000	0	6637100	13978000	14319000	32103000	30949000	13770000	14074000	53372000	1893000	20991000	1397100	11621000
AT1G07990.1	AT1G07990.1	SIT4 phosphatase-associated family protein	0.540447	T	505	0.763932	2.80345e-12	116.24	106.39	61.112	0	0	0	0	4130800	0	0	0	0	0	0	0	0	0	0	0	0	0	0	0
AT1G08090.1	AT1G08090.1	nitrate transporter 2:1	0.552845	S	25	1.47714	0.000532789	68.576	55.592	61.375	0	0	2823300	0	0	0	0	0	0	0	0	0	0	0	0	0	0	0	0	0
AT1G08090.1	AT1G08090.1	nitrate transporter 2:1	0.996987	S	28	29.0639	9.45365e-07	123.63	100.41	123.63	0	0	0	7311800	5533900	1946000	0	0	0	0	3711200	3012900	0	2442700	0	0	0	0	0	2119200
AT1G08090.1	AT1G08090.1	nitrate transporter 2:1	0.776314	S	10	5.41642	6.83723e-14	150.39	126.51	150.39	15815000	0	13840000	0	17308000	0	0	0	0	0	0	0	0	0	0	0	0	0	0	0
AT1G08090.1	AT1G08090.1	nitrate transporter 2:1	0.929955	S	11	11.2344	2.56156e-20	166.48	129.23	165.16	0	0	0	30159000	0	17385000	0	8269400	9436900	0	11297000	24686000	19670000	17501000	16366000	0	0	19232000	0	0
AT1G08130.1	AT1G08130.1	DNA ligase 1	0.497461	S	78	0	6.20281e-05	82.663	62	82.663	0	0	0	0	0	0	0	0	0	0	0	0	0	0	0	0	0	0	0	0
AT1G08130.1	AT1G08130.1	DNA ligase 1	0.994035	S	80	22.254	1.02262e-29	181.51	145.85	142.57	27554000	29439000	29324000	77472000	57549000	33471000	45027000	18908000	22211000	0	26105000	47566000	29588000	42268000	46778000	14234000	9243900	47767000	0	0
AT1G08190.1	AT1G08190.1	vacuolar protein sorting 41	0.596364	S	859	1.74922	0.000274374	71.08	43.744	71.08	0	0	0	17013000	0	0	0	0	0	0	0	0	0	0	0	16955000	0	14711000	0	19800000
AT1G08190.1	AT1G08190.1	vacuolar protein sorting 41	0.82332	S	860	6.71262	3.56168e-08	112.17	81.69	112.17	0	17825000	17699000	0	9476300	0	0	0	0	16360000	13814000	0	0	0	0	0	0	0	0	0
AT1G08200.1	AT1G08200.1	UDP-D-apiose/UDP-D-xylose synthase 2	0.976508	S	320	16.3791	3.15782e-13	141.13	104.54	91.858	3537700	4733600	3480000	6583700	5130200	4243000	5461700	3527900	4836100	3514200	3570600	5268200	5806800	4022100	3712100	6201800	1872600	7120500	2194700	5589200
AT1G08200.1;AT2G27860.1	AT1G08200.1	UDP-D-apiose/UDP-D-xylose synthase 2 ; UDP-D-apiose/UDP-D-xylose synthase 1	0.998344	S	177	27.8022	0.00508323	48.659	30.563	48.659	659790	0	323780	205180	707280	0	0	230910	0	617610	0	737800	1120100	915980	0	2465500	0	0	0	545120
AT1G08290.1	AT1G08290.1	WIP domain protein 3	0.999997	Y	34	55.9733	0.00153756	59.908	36.057	59.908	20274000	0	13623000	0	0	16310000	17686000	11873000	0	16340000	0	0	19042000	0	0	0	0	828870	0	16338000
AT1G08290.1	AT1G08290.1	WIP domain protein 3	0.999998	T	38	56.1612	0.00153756	59.908	36.057	59.908	20274000	0	13623000	0	0	16310000	17686000	11873000	0	16340000	0	0	19042000	0	0	0	0	828870	0	16338000
AT1G08370.1	AT1G08370.1	decapping 1	0.926031	T	321	15.1709	0.00103082	43.703	38.415	43.703	0	214680	394690	3005300	1307800	650380	1139300	214070	278350	548430	665100	2019100	993090	442450	474490	4256800	0	1374200	0	760440
AT1G08420.2	AT1G08420.2	BRI1 suppressor 1 (BSU1)-like 2 ; BRI1 suppressor 1 (BSU1)-like 2	0.5	S	969	0	1.48596e-14	153.72	146	52.254	1762000	672140	1761800	0	0	3044800	1918500	1362400	1952100	1721300	0	2161500	0	923870	0	3268300	489470	515030	0	1924000
AT1G08420.2	AT1G08420.2	BRI1 suppressor 1 (BSU1)-like 2 ; BRI1 suppressor 1 (BSU1)-like 2	0.941554	S	970	12.5719	1.17368e-19	157.8	150.08	84.107	18245000	19638000	17574000	29343000	21841000	26725000	27533000	14951000	19059000	18431000	16333000	25470000	18662000	15265000	12682000	21433000	7525600	20328000	8134700	23832000
AT1G08420.2	AT1G08420.2	BRI1 suppressor 1 (BSU1)-like 2 ; BRI1 suppressor 1 (BSU1)-like 2	0.5	S	974	0	0.00444122	52.254	42.505	52.254	1762000	672140	1761800	0	0	3044800	1918500	1362400	1952100	1721300	0	2161500	0	923870	0	3268300	489470	515030	0	1924000
AT1G08420.2	AT1G08420.2	BRI1 suppressor 1 (BSU1)-like 2 ; BRI1 suppressor 1 (BSU1)-like 2	0.528561	T	973	0.558696	0.00444122	52.254	42.505	52.254	1762000	672140	1761800	0	0	3044800	1918500	1362400	1952100	1721300	0	2161500	0	923870	0	3268300	489470	515030	0	1924000
AT1G08420.2;AT2G27210.2	AT2G27210.2	BRI1 suppressor 1 (BSU1)-like 2 ; BRI1 suppressor 1 (BSU1)-like 2 ; BRI1 suppressor 1 (BSU1)-like 3 ; BRI1 suppressor 1 (BSU1)-like 3	1	S	611	84.3649	2.30279e-157	283.47	259.13	84.365	24713000	23871000	16815000	53213000	29921000	29115000	27448000	17102000	15625000	20920000	20162000	31129000	28650000	20402000	23497000	27917000	8893300	27942000	6009100	17857000
AT1G08420.2;AT2G27210.2	AT2G27210.2	BRI1 suppressor 1 (BSU1)-like 2 ; BRI1 suppressor 1 (BSU1)-like 2 ; BRI1 suppressor 1 (BSU1)-like 3 ; BRI1 suppressor 1 (BSU1)-like 3	0.980345	S	642	16.979	0.00581869	46.129	24.828	46.129	0	0	0	0	0	0	0	0	0	0	0	0	0	0	32408000	0	14142000	0	0	0
AT1G08590.1	AT1G08590.1	Leucine-rich receptor-like protein kinase family protein	1	S	1009	42.2093	0.0157524	42.209	28.806	42.209	0	0	0	0	0	0	0	0	0	0	0	0	0	0	0	0	0	0	0	0
AT1G08680.2	AT1G08680.2	ARF GAP-like zinc finger-containing protein ZIGA4 ; ARF GAP-like zinc finger-containing protein ZIGA4 ; ARF GAP-like zinc finger-containing protein ZIGA4	0.870227	S	224	8.78584	2.211e-07	121.76	92.227	120.53	0	6134200	0	0	0	0	0	0	0	0	0	0	0	0	0	8201300	0	0	0	0
AT1G08680.2	AT1G08680.2	ARF GAP-like zinc finger-containing protein ZIGA4 ; ARF GAP-like zinc finger-containing protein ZIGA4 ; ARF GAP-like zinc finger-containing protein ZIGA4	0.979942	S	225	16.8894	3.32858e-10	136.6	115.35	130.24	9625400	0	6238700	10074000	5777300	8863100	6498600	4594000	5825900	5328200	3831900	9516900	7864500	6855100	4002400	0	2404100	7281500	2563400	7039500
AT1G08680.2	AT1G08680.2	ARF GAP-like zinc finger-containing protein ZIGA4 ; ARF GAP-like zinc finger-containing protein ZIGA4 ; ARF GAP-like zinc finger-containing protein ZIGA4	0.959332	S	192	13.93	0.017001	53.001	47.342	47.712	5644800	7103600	4768700	6951500	5714200	9632900	5930100	3056000	6189100	4958900	3675200	6806600	7604300	4986100	4408100	7642100	1876800	5786900	2355300	4803200
AT1G08680.2	AT1G08680.2	ARF GAP-like zinc finger-containing protein ZIGA4 ; ARF GAP-like zinc finger-containing protein ZIGA4 ; ARF GAP-like zinc finger-containing protein ZIGA4	0.997634	S	196	26.6444	0.00753519	53.001	47.342	45.915	16831000	7103600	13713000	21009000	18463000	23135000	10613000	3056000	15741000	5737900	10519000	17996000	18943000	16738000	13705000	7642100	1876800	5786900	8324800	15033000
AT1G08680.2	AT1G08680.2	ARF GAP-like zinc finger-containing protein ZIGA4 ; ARF GAP-like zinc finger-containing protein ZIGA4 ; ARF GAP-like zinc finger-containing protein ZIGA4 ; ARF GAP-like zinc finger-containing protein ZIGA4	1	S	236	72.0475	2.86165e-27	170.49	134.75	170.49	14651000	7254600	7630100	13595000	9166900	15593000	7524300	6086700	10021000	7890100	7658300	10363000	11230000	6492400	6292300	8026800	2986100	8320600	3960800	10809000
AT1G08720.1	AT1G08720.1	Protein kinase superfamily protein	0.989021	S	114	19.5475	0.00021029	71.176	53.039	63.091	1954000	3749400	0	4478300	0	3754700	2647100	0	1800400	2911900	2292000	3607800	2988300	3003900	2594900	4662000	972040	2549300	1813200	2758000
AT1G08720.1	AT1G08720.1	Protein kinase superfamily protein ; Protein kinase superfamily protein	0.476792	S	826	0	0.00382979	55.841	39.587	53.3	0	0	0	0	0	0	0	0	0	0	0	0	0	0	0	0	0	0	0	0
AT1G08720.1	AT1G08720.1	Protein kinase superfamily protein ; Protein kinase superfamily protein	0.476792	T	827	0	0.00382979	55.841	39.587	53.3	0	0	0	0	0	0	0	0	0	0	0	0	0	0	0	0	0	0	0	0
AT1G08800.2	AT1G08800.2	Protein of unknown function, DUF593 ; Protein of unknown function, DUF593	0.499748	S	825	0	0.00256375	55.401	29.964	55.401	0	0	0	0	0	0	0	0	0	0	0	0	0	0	0	0	0	0	0	0
AT1G08800.2	AT1G08800.2	Protein of unknown function, DUF593 ; Protein of unknown function, DUF593	0.499748	S	827	0	0.00256375	55.401	29.964	55.401	0	0	0	0	0	0	0	0	0	0	0	0	0	0	0	0	0	0	0	0
AT1G08800.2	AT1G08800.2	Protein of unknown function, DUF593 ; Protein of unknown function, DUF593	1	S	834	85.493	3.83075e-06	95.428	67.217	85.493	2411400	3916700	1692800	6810900	4444800	3009600	4716500	1466800	1472400	2067900	2411800	2497000	1728700	2776400	2473900	0	885460	2751900	776820	0
AT1G08800.2	AT1G08800.2	Protein of unknown function, DUF593 ; Protein of unknown function, DUF593	1	S	839	85.493	3.83075e-06	95.428	67.217	85.493	2411400	3916700	1692800	6810900	4444800	3009600	4716500	1466800	1472400	2067900	2411800	2497000	1728700	2776400	2473900	0	885460	2751900	776820	0
AT1G08800.2	AT1G08800.2	Protein of unknown function, DUF593 ; Protein of unknown function, DUF593	0.999199	S	206	31.03	7.48656e-07	124.42	101.54	114.56	0	8229900	3271400	3755700	0	3779600	5425500	2370100	0	4219400	2987400	4465100	0	3753900	4200700	0	0	6197300	0	0
AT1G08800.2	AT1G08800.2	Protein of unknown function, DUF593 ; Protein of unknown function, DUF593	0.900005	S	215	10.1646	4.65717e-05	98.508	83.946	60.541	5157600	9623600	6947000	0	0	11015000	0	0	0	5257600	0	7522400	0	0	0	6139300	0	0	0	0
AT1G08800.2	AT1G08800.2	Protein of unknown function, DUF593 ; Protein of unknown function, DUF593	0.999589	S	872	33.953	5.31341e-05	64.176	56.59	64.176	0	3013400	0	0	0	742050	7302800	0	221310	11800000	6267700	16617000	500270	0	3017700	0	0	0	492930	6031500
AT1G08800.2	AT1G08800.2	Protein of unknown function, DUF593 ; Protein of unknown function, DUF593	0.5	S	188	0	8.35337e-05	96.666	78.301	96.666	0	0	0	0	0	0	0	0	0	0	0	0	0	0	0	0	0	0	6529300	0
AT1G08800.2	AT1G08800.2	Protein of unknown function, DUF593 ; Protein of unknown function, DUF593	0.999716	S	190	35.4603	2.40725e-19	158.65	111.72	158.65	23417000	25603000	15320000	48618000	34288000	29321000	24419000	0	23195000	24565000	0	0	38399000	28242000	23583000	134030000	6012700	41803000	6529300	18980000
AT1G08800.2	AT1G08800.2	Protein of unknown function, DUF593 ; Protein of unknown function, DUF593	0.990956	S	1007	20.3979	3.17985e-14	143.93	109.67	130.24	2425900	4663000	0	0	1440000	2119000	5397300	1358100	2152500	3072700	0	3088800	3415300	1670800	0	4259900	734860	1286600	2001000	0
AT1G08820.2	AT1G08820.2	vamp/synaptobrevin-associated protein 27-2 ; vamp/synaptobrevin-associated protein 27-2	0.656611	S	128	0	0.000628724	77.078	54.54	43.991	5167000	0	0	10008000	0	0	0	3249200	0	0	4412800	0	0	6533000	0	0	1081000	0	0	4044400
AT1G08820.2	AT1G08820.2	vamp/synaptobrevin-associated protein 27-2 ; vamp/synaptobrevin-associated protein 27-2	0.995536	S	130	25.3043	1.03281e-09	127.97	101.2	125.53	20114000	18553000	20027000	36860000	19127000	29425000	21536000	12077000	25987000	20430000	17365000	31012000	24757000	21603000	24622000	24431000	4655200	22161000	4096400	15826000
AT1G08820.2	AT1G08820.2	vamp/synaptobrevin-associated protein 27-2 ; vamp/synaptobrevin-associated protein 27-2	0.981338	S	134	18.1537	0.000309377	82.449	59.647	76.326	5167000	5546400	5300800	10008000	0	11374000	11280000	3249200	6859300	5980000	4412800	13779000	513240	6533000	9788400	6936100	1081000	10488000	1412400	4044400
AT1G09020.1	AT1G09020.1	homolog of yeast sucrose nonfermenting 4	0.999959	S	142	43.9125	0.00613359	50.354	37.727	50.354	0	5272600	2244400	0	0	0	4195000	0	0	0	0	0	0	0	0	0	1189600	0	2149400	2159100
AT1G09170.1	AT1G09170.1	P-loop nucleoside triphosphate hydrolases superfamily protein with CH (Calponin Homology) domain	0.895789	S	981	9.34292	5.52832e-05	95.57	80.426	85.734	0	1600700	0	0	0	0	2379600	0	0	0	0	0	0	0	0	2078800	0	1085800	761300	0
AT1G09170.1	AT1G09170.1	P-loop nucleoside triphosphate hydrolases superfamily protein with CH (Calponin Homology) domain	1	T	769	63.6407	4.86379e-07	127.32	100.29	127.32	5626200	9432000	4137500	7782300	6500900	6899900	15342000	3873100	5462500	8162300	4671200	5047200	9842300	4814000	6625000	10024000	1869000	5442000	3954200	3761200
AT1G09210.1	AT1G09210.1	calreticulin 1b	1	S	381	73.4414	5.8458e-17	109.61	102.5	109.61	0	0	0	0	0	0	0	0	0	0	0	0	0	0	0	0	0	0	0	0
AT1G09440.1	AT1G09440.1	Protein kinase superfamily protein	0.996516	Y	219	24.5645	0.0097654	49.418	23.859	49.418	980240	0	0	0	3207000	0	0	0	0	0	0	0	2800300	2866500	0	0	924920	0	593560	2118500
AT1G09450.1	AT1G09450.1	Protein kinase superfamily protein	0.900808	Y	508	10.008	3.32866e-05	84.17	66.306	84.17	95023	136800	120990	929100	459710	409880	190830	0	135530	164630	175830	420690	256440	159900	177160	711970	0	428160	0	219780
AT1G09660.2	AT1G09660.2	RNA-binding KH domain-containing protein ; RNA-binding KH domain-containing protein	0.916811	S	90	11.2733	0.00924209	44.089	29.763	44.089	0	657830	0	0	0	2853700	1516500	0	0	0	466350	0	0	0	0	0	636640	0	0	2098800
AT1G09730.2	AT1G09730.2	Cysteine proteinases superfamily protein ; Cysteine proteinases superfamily protein	0.789548	S	144	5.7836	0.00862605	41.749	28.977	41.749	0	0	0	12100000	0	0	0	0	0	0	0	0	0	0	0	0	0	0	0	0
AT1G09730.2	AT1G09730.2	Cysteine proteinases superfamily protein ; Cysteine proteinases superfamily protein	0.999961	S	921	45.7646	7.47891e-22	166.6	145.05	166.6	24894000	19518000	15030000	27003000	20028000	25483000	20817000	10650000	16953000	17532000	11147000	27647000	22006000	19912000	16085000	24566000	5817400	22919000	8108600	12782000
AT1G09760.1	AT1G09760.1	U2 small nuclear ribonucleoprotein A	1	T	191	75.4423	5.83065e-11	125.75	86.567	115.06	4181800	2361800	7418000	0	0	8244300	6722200	4564100	5525800	0	1792700	7755200	0	5101600	5453200	3916500	2779700	9337500	3426900	7523100
AT1G09770.1	AT1G09770.1	cell division cycle 5	0.500022	S	378	0	0.000114653	61.776	49.285	42.015	7154800	4677200	0	612040	8605900	0	0	2704400	0	0	6083400	0	9732900	5470100	0	0	0	6137500	1041100	0
AT1G09770.1	AT1G09770.1	cell division cycle 5	0.373412	S	393	0.762397	4.65298e-05	64.914	51.986	64.914	0	0	0	0	0	0	0	0	0	0	0	0	0	0	0	0	0	0	0	0
AT1G09770.1	AT1G09770.1	cell division cycle 5	0.892972	T	343	9.21642	4.32361e-07	108.72	86.485	108.72	0	0	0	13812000	0	0	0	0	0	0	0	0	0	0	0	1008200	0	0	0	0
AT1G09770.1	AT1G09770.1	cell division cycle 5	0.814076	T	380	6.4721	5.63553e-05	67.752	50.251	67.752	7154800	4677200	6200100	13362000	8605900	10940000	4964100	2704400	7394900	5414200	6083400	8496100	9732900	5470100	6104100	0	1231100	6137500	1041100	5181600
AT1G09770.1	AT1G09770.1	cell division cycle 5	0.634486	T	396	5.10536	9.10234e-07	90.123	74.994	46.696	0	0	0	0	0	0	5900600	0	0	0	4229700	0	0	0	0	0	818200	0	415630	0
AT1G09770.1	AT1G09770.1	cell division cycle 5	0.76552	T	399	6.12948	5.63553e-05	67.752	50.251	55.608	7154800	0	0	13362000	8605900	10940000	4964100	2704400	7394900	5414200	0	8496100	0	5470100	0	0	1231100	6137500	1041100	5181600
AT1G09780.1	AT1G09780.1	Phosphoglycerate mutase, 2,3-bisphosphoglycerate-independent ; Phosphoglycerate mutase, 2,3-bisphosphoglycerate-independent ; Phosphoglycerate mutase, 2,3-bisphosphoglycerate-independent	0.534702	S	73	0.607124	0.00185708	46.926	35.87	46.926	3634100	4085900	3429500	8272700	0	5457700	4592300	1655200	3088100	3810700	2202600	3561400	5030400	4157800	4316000	4935700	1361400	4277100	0	2095700
AT1G09780.1	AT1G09780.1	Phosphoglycerate mutase, 2,3-bisphosphoglycerate-independent ; Phosphoglycerate mutase, 2,3-bisphosphoglycerate-independent ; Phosphoglycerate mutase, 2,3-bisphosphoglycerate-independent	1	S	80	83.5185	1.72178e-147	270.82	261.52	268.96	205770000	279260000	180010000	401680000	246930000	321800000	273700000	145410000	167660000	222280000	140490000	234740000	282530000	205140000	244500000	250100000	71930000	343390000	97354000	157970000
AT1G09800.1	AT1G09800.1	Pseudouridine synthase family protein	0.996938	S	31	25.126	3.3957e-27	141.64	128.97	141.64	1281000	0	0	5352400	0	4573600	276420	1275800	1475800	0	2225100	0	0	0	2061800	8616800	594680	5042500	387620	0
AT1G09800.1	AT1G09800.1	Pseudouridine synthase family protein	0.52131	S	35	0.374056	2.12234e-05	69.619	62.343	48.489	0	0	0	0	4186200	3320500	0	0	0	0	0	2911200	0	0	0	0	0	5042500	0	0
AT1G09840.6	AT1G09840.6	shaggy-like protein kinase 41 ; shaggy-like protein kinase 41 ; shaggy-like protein kinase 41 ; shaggy-like protein kinase 41 ; shaggy-like protein kinase 41 ; shaggy-like protein kinase 41	0.688152	Y	243	5.26054	0.0141462	48.004	35.957	48.004	0	0	6365800	0	0	0	0	0	0	0	0	0	0	0	0	0	0	0	0	0
AT1G10290.1	AT1G10290.1	dynamin-like protein 6	0.499955	Y	876	0	0.00467523	46.833	35.312	46.833	0	0	0	0	0	0	0	0	0	0	0	0	6353000	0	0	0	0	0	0	0
AT1G10290.1	AT1G10290.1	dynamin-like protein 6	0.786045	S	836	5.6527	9.52208e-202	315.93	296.87	315.93	0	144980000	113060000	181820000	0	179760000	0	0	0	114740000	85602000	175760000	0	146550000	0	0	0	0	77568000	0
AT1G10290.1	AT1G10290.1	dynamin-like protein 6	0.904091	S	837	9.74394	0	362.84	341.07	317.96	183410000	0	0	0	140640000	0	186770000	85399000	142240000	0	0	0	163140000	0	111780000	106180000	53954000	141500000	0	130130000
AT1G10290.1	AT1G10290.1	dynamin-like protein 6	0.996839	S	533	24.9875	6.76015e-10	140.22	132.17	129.65	345740000	0	243950000	375320000	293560000	351400000	272020000	203700000	289850000	232730000	196450000	398270000	366000000	267580000	229810000	296710000	105170000	311780000	107610000	241490000
AT1G10290.1	AT1G10290.1	dynamin-like protein 6	0.978312	S	877	16.7129	1.13446e-05	88.036	57.074	59.281	7705700	5313700	0	8244600	0	6353400	4905900	2887900	4625200	2978900	2214700	0	6988900	4929000	2574500	5812000	1336000	4619400	1888300	3972800
AT1G10290.1	AT1G10290.1	dynamin-like protein 6	0.535589	T	532	0.619299	2.30203e-06	124.38	118.07	124.38	0	275090000	0	0	0	0	0	0	0	0	0	0	0	0	0	0	0	0	0	0
AT1G10290.1	AT1G10290.1	dynamin-like protein 6	0.499994	T	896	0	0.00927351	51.857	38.799	51.857	0	0	0	7731000	7338900	0	0	0	0	0	4501100	0	8387800	6322100	1308400	6989000	0	8615700	0	0
AT1G10290.1	AT1G10290.1	dynamin-like protein 6	0.499994	T	897	0	0.00927351	51.857	38.799	51.857	0	0	0	7731000	7338900	0	0	0	0	0	4501100	0	8387800	6322100	1308400	6989000	0	8615700	0	0
AT1G10290.1;AT1G59610.1	AT1G10290.1	dynamin-like protein 6 ; dynamin-like 3	1	S	816	46.1581	0.00292671	46.158	15.904	46.158	0	70406000	0	0	0	0	0	38592000	0	48755000	0	0	0	0	0	0	0	0	28952000	0
AT1G10290.1;AT1G59610.1	AT1G10290.1	dynamin-like protein 6 ; dynamin-like 3	0.989987	S	712	20.1017	0.000371204	68.515	52.042	65.179	0	39929000	0	0	0	0	0	29070000	0	0	0	0	37416000	0	0	41862000	16581000	0	19878000	38588000
AT1G10390.2	AT1G10390.2	Nucleoporin autopeptidase ; Nucleoporin autopeptidase	0.275647	S	753	0	6.17313e-05	94.728	79.131	86.313	0	0	0	0	0	0	0	0	0	0	0	0	0	0	0	0	0	0	0	0
AT1G10390.2	AT1G10390.2	Nucleoporin autopeptidase ; Nucleoporin autopeptidase	0.328709	S	754	0	2.37021e-13	145.1	127	145.1	0	0	0	0	0	0	0	0	0	0	0	0	0	0	0	0	0	0	0	0
AT1G10390.2	AT1G10390.2	Nucleoporin autopeptidase ; Nucleoporin autopeptidase	0.572572	S	755	3.06716	2.37021e-13	145.1	127	140.27	0	0	0	0	0	0	0	0	0	0	0	0	8791400	0	0	7056900	0	0	0	0
AT1G10390.2	AT1G10390.2	Nucleoporin autopeptidase ; Nucleoporin autopeptidase	0.790921	T	756	6.77119	3.59759e-19	158.93	128.36	133.48	0	0	0	0	0	11304000	0	0	0	0	0	7449000	0	5180900	0	0	0	0	0	6374000
AT1G10450.1	AT1G10450.1	SIN3-like 6	0.999977	S	698	46.6517	4.91197e-177	297.72	249.94	231.13	20274000	13441000	16008000	35928000	22303000	27251000	14080000	11863000	16155000	10334000	11290000	21455000	21641000	18126000	17426000	20109000	5840900	24833000	5535100	15661000
AT1G10490.1	AT1G10490.1	Domain of unknown function (DUF1726) ;Putative ATPase (DUF699)	0.79124	S	661	6.00893	2.78796e-08	75.893	64.789	75.893	0	0	0	17260000	6544300	5295700	0	0	0	0	0	10674000	0	5891200	0	8430400	0	0	0	1981100
AT1G10490.1	AT1G10490.1	Domain of unknown function (DUF1726) ;Putative ATPase (DUF699)	0.535313	T	666	0.71443	4.79065e-06	65.736	60.192	65.736	0	0	0	0	0	0	0	0	0	0	0	0	0	0	0	0	0	4832900	0	0
AT1G10520.1	AT1G10520.1	DNA polymerase lambda (POLL)	0.249994	S	127	0	0.00538965	52.527	36.52	52.527	0	0	0	0	0	0	0	0	0	0	0	0	0	0	0	0	0	0	0	0
AT1G10520.1	AT1G10520.1	DNA polymerase lambda (POLL)	0.494062	S	129	3.7335	9.9734e-05	93.478	77.849	62.408	0	0	0	0	0	0	0	0	0	0	0	0	0	0	0	0	0	0	0	0
AT1G10520.1	AT1G10520.1	DNA polymerase lambda (POLL)	0.445085	S	133	0	0.000119326	89.624	66.938	80.387	0	0	0	0	0	0	0	0	0	0	0	0	0	0	0	0	0	0	0	0
AT1G10520.1	AT1G10520.1	DNA polymerase lambda (POLL)	0.83851	S	134	7.75545	0.000129787	87.566	71.936	87.566	0	0	0	0	0	0	0	0	0	0	0	7278200	0	0	0	0	0	5386000	0	0
AT1G10740.4	AT1G10740.4	alpha/beta-Hydrolases superfamily protein ; alpha/beta-Hydrolases superfamily protein ; alpha/beta-Hydrolases superfamily protein	0.408908	S	456	1.41171	0.0134761	48.004	30.568	48.004	0	0	0	0	0	0	0	0	0	0	0	0	0	0	0	0	0	0	0	0
AT1G10740.4	AT1G10740.4	alpha/beta-Hydrolases superfamily protein ; alpha/beta-Hydrolases superfamily protein ; alpha/beta-Hydrolases superfamily protein	0.460624	S	458	0	0.000221764	69.716	55.999	69.716	0	0	0	0	0	0	0	0	0	0	0	0	0	0	0	0	0	0	0	0
AT1G10740.4	AT1G10740.4	alpha/beta-Hydrolases superfamily protein ; alpha/beta-Hydrolases superfamily protein ; alpha/beta-Hydrolases superfamily protein	0.460624	S	459	0	0.000221764	69.716	55.999	69.716	0	0	0	0	0	0	0	0	0	0	0	0	0	0	0	0	0	0	0	0
AT1G10840.2	AT1G10840.2	translation initiation factor 3 subunit H1 ; translation initiation factor 3 subunit H1	0.999995	S	189	53.3728	0.00142588	61.097	50.901	61.097	0	1180300	934480	0	2994500	2805000	3151000	1914100	3453000	2575900	2776400	3216000	2820500	0	1269600	0	532520	2280700	0	0
AT1G10870.1	AT1G10870.1	ARF-GAP domain 4	0.591923	S	357	1.61658	9.16139e-37	182.35	164.08	182.35	0	0	0	0	0	0	0	12293000	0	0	0	0	0	0	0	0	0	0	0	0
AT1G10870.1	AT1G10870.1	ARF-GAP domain 4	0.997754	S	359	26.5551	2.06531e-152	278.84	249.11	259.96	18361000	12123000	11854000	27112000	19023000	15770000	13880000	0	14706000	14590000	10502000	15245000	17986000	13858000	13958000	20781000	6023200	21165000	4566800	17102000
AT1G10890.1	AT1G10890.1	unknown protein; FUNCTIONS IN: molecular_function unknown; INVOLVED IN: biological_process unknown; LOCATED IN: chloroplast; EXPRESSED IN: petal, flower, leaf; EXPRESSED DURING: LP.04 four leaves visible, 4 anthesis, petal differentiation and expansion st	0.994879	S	39	34.651	0.00360885	56.599	46.646	45.864	3749100	0	2250600	8317400	5177000	6592800	4761200	1634500	2921400	1913600	1566500	5948200	6179900	3147100	3287900	3630100	613410	3542100	0	2768100
AT1G10890.1	AT1G10890.1	unknown protein; FUNCTIONS IN: molecular_function unknown; INVOLVED IN: biological_process unknown; LOCATED IN: chloroplast; EXPRESSED IN: petal, flower, leaf; EXPRESSED DURING: LP.04 four leaves visible, 4 anthesis, petal differentiation and expansion st	0.914271	S	41	14.6325	0.00360885	56.599	46.646	56.599	3749100	0	2250600	8317400	5177000	6592800	4761200	1634500	2921400	1913600	1566500	5948200	0	3147100	3287900	3630100	613410	3542100	0	2768100
AT1G10900.1	AT1G10900.1	Phosphatidylinositol-4-phosphate 5-kinase family protein	0.5	S	222	0	0.00311339	54.259	34.053	46.352	0	0	0	0	0	0	0	0	11586000	0	0	0	0	0	0	0	0	14524000	0	0
AT1G10900.1	AT1G10900.1	Phosphatidylinositol-4-phosphate 5-kinase family protein	0.980703	S	224	17.0605	0.000553973	65.5	47.233	65.5	11368000	10492000	8750800	0	0	0	0	9137200	11586000	7610300	0	0	0	0	0	0	5323800	14524000	5088500	0
AT1G10940.1	AT1G10940.1	Protein kinase superfamily protein ; Protein kinase superfamily protein	1	S	357	73.4995	1.55278e-06	87.184	59.171	73.499	5709200	5913100	7481400	6303300	3809300	5451000	5084800	5305500	3550800	4131100	4899500	7221800	5091600	6666200	3486900	8019200	2253300	2461300	5583800	6542400
AT1G10940.1;AT1G60940.2	AT1G10940.1	Protein kinase superfamily protein ; Protein kinase superfamily protein ; SNF1-related protein kinase 2.1 ; SNF1-related protein kinase 2.5 ; SNF1-related protein kinase 2.10 ; SNF1-related protein kinase 2.10	0.499999	S	158	0	1.52222e-19	162.29	148.39	125.67	12519000	0	10661000	13414000	0	0	8250000	12631000	11401000	6596400	0	14378000	13515000	11158000	6392200	18148000	0	17338000	0	0
AT1G10940.1;AT1G60940.2	AT1G10940.1	Protein kinase superfamily protein ; Protein kinase superfamily protein ; SNF1-related protein kinase 2.1 ; SNF1-related protein kinase 2.5 ; SNF1-related protein kinase 2.10 ; SNF1-related protein kinase 2.10	0.499999	T	159	0	1.52222e-19	162.29	148.39	125.67	12519000	0	10661000	13414000	0	0	8250000	12631000	11401000	6596400	0	14378000	13515000	11158000	6392200	18148000	0	17338000	0	0
AT1G11310.1	AT1G11310.1	Seven transmembrane MLO family protein	1	S	565	45.0775	0.00739061	48.741	35.062	45.077	780080	0	0	23273000	11782000	0	1006600	5122100	737680	5005000	8067900	19298000	13801000	12317000	0	13820000	0	10967000	0	883840
AT1G11310.1	AT1G11310.1	Seven transmembrane MLO family protein	1	S	570	45.0775	0.00739061	48.741	35.062	45.077	780080	0	0	23273000	11782000	0	1006600	5122100	737680	5005000	8067900	19298000	13801000	12317000	0	13820000	0	10967000	0	883840
AT1G11310.1	AT1G11310.1	Seven transmembrane MLO family protein	0.590008	S	509	2.60685	4.96608e-10	121.28	104.75	78.964	0	0	8298600	0	0	0	0	0	0	0	0	0	0	0	0	0	0	0	0	7638400
AT1G11310.1	AT1G11310.1	Seven transmembrane MLO family protein	0.939763	S	510	11.9008	8.32314e-18	151.99	129.46	113.65	9689700	14165000	0	18690000	11581000	24746000	7011700	5002000	7693400	3551700	6045900	17227000	14247000	17990000	11991000	16913000	1281200	10155000	1920200	9543900
AT1G11310.1	AT1G11310.1	Seven transmembrane MLO family protein	0.997221	S	512	25.2578	6.40158e-53	196.5	164.24	100.55	47928000	28991000	43180000	62446000	42706000	45604000	28087000	31106000	43002000	20234000	34521000	63369000	51405000	38552000	39597000	33902000	13562000	41003000	12833000	39527000
AT1G11360.4	AT1G11360.4	Adenine nucleotide alpha hydrolases-like superfamily protein ; Adenine nucleotide alpha hydrolases-like superfamily protein ; Adenine nucleotide alpha hydrolases-like superfamily protein ; Adenine nucleotide alpha hydrolases-like superfamily protein	0.999977	S	208	46.4312	1.18534e-09	128.06	98.082	128.06	0	0	0	8382900	5438900	4866900	12115000	2245600	4587700	3622300	6344200	0	7240700	3934800	7889100	4900200	0	2930300	0	3369400
AT1G11360.4	AT1G11360.4	Adenine nucleotide alpha hydrolases-like superfamily protein ; Adenine nucleotide alpha hydrolases-like superfamily protein ; Adenine nucleotide alpha hydrolases-like superfamily protein ; Adenine nucleotide alpha hydrolases-like superfamily protein	0.793461	S	14	5.90068	1.45539e-06	87.155	74.959	58.137	2507500	4370700	3426000	0	0	0	4656000	1825900	0	4121200	2895400	5535500	0	0	4464900	0	0	8542900	0	2483700
AT1G11360.4	AT1G11360.4	Adenine nucleotide alpha hydrolases-like superfamily protein ; Adenine nucleotide alpha hydrolases-like superfamily protein ; Adenine nucleotide alpha hydrolases-like superfamily protein ; Adenine nucleotide alpha hydrolases-like superfamily protein	0.921708	S	23	10.7088	9.52293e-113	253.83	204.55	237.59	164740000	102160000	99050000	158720000	0	6922000	0	122670000	163480000	0	101780000	195690000	218270000	2798000	122530000	5374000	52735000	173780000	0	152420000
AT1G11360.4	AT1G11360.4	Adenine nucleotide alpha hydrolases-like superfamily protein ; Adenine nucleotide alpha hydrolases-like superfamily protein ; Adenine nucleotide alpha hydrolases-like superfamily protein ; Adenine nucleotide alpha hydrolases-like superfamily protein	0.974721	S	24	16.4002	3.59857e-95	248.76	195.15	221.29	78079000	120520000	8195900	298920000	13551000	128360000	179090000	0	74338000	144840000	154910000	13671000	120640000	122390000	148140000	120800000	0	141950000	0	143700000
AT1G11360.4	AT1G11360.4	Adenine nucleotide alpha hydrolases-like superfamily protein ; Adenine nucleotide alpha hydrolases-like superfamily protein ; Adenine nucleotide alpha hydrolases-like superfamily protein ; Adenine nucleotide alpha hydrolases-like superfamily protein	0.612843	S	30	2.37461	2.73078e-24	144.89	97.509	129.51	8123800	12719000	8195900	15402000	13551000	0	0	0	0	10828000	0	0	0	0	14307000	0	0	0	0	8859400
AT1G11360.4	AT1G11360.4	Adenine nucleotide alpha hydrolases-like superfamily protein ; Adenine nucleotide alpha hydrolases-like superfamily protein ; Adenine nucleotide alpha hydrolases-like superfamily protein ; Adenine nucleotide alpha hydrolases-like superfamily protein	0.607493	T	16	1.93433	1.21021e-05	71.608	58.789	71.608	0	0	0	0	7405800	4133500	0	0	0	0	0	0	6069900	0	0	3942800	0	0	0	0
AT1G11360.4	AT1G11360.4	Adenine nucleotide alpha hydrolases-like superfamily protein ; Adenine nucleotide alpha hydrolases-like superfamily protein ; Adenine nucleotide alpha hydrolases-like superfamily protein ; Adenine nucleotide alpha hydrolases-like superfamily protein	0.637332	T	19	6.93983	0.000138606	83.883	62.637	83.883	0	0	0	0	0	0	0	0	0	0	0	0	0	0	0	0	0	0	0	0
AT1G11360.4	AT1G11360.4	Adenine nucleotide alpha hydrolases-like superfamily protein ; Adenine nucleotide alpha hydrolases-like superfamily protein ; Adenine nucleotide alpha hydrolases-like superfamily protein ; Adenine nucleotide alpha hydrolases-like superfamily protein	0.786218	T	31	7.4819	1.53753e-30	159.42	119.51	122.09	0	0	0	0	0	0	14044000	0	0	0	0	0	9532600	0	0	0	0	0	0	0
AT1G11450.1	AT1G11450.1	nodulin MtN21 /EamA-like transporter family protein ; nodulin MtN21 /EamA-like transporter family protein	0.660089	S	250	6.38599	0.00623494	50.897	38.942	50.897	0	0	1621300	0	0	0	0	1980200	0	0	1786600	2733500	3798200	0	0	2503800	0	2970400	0	2154300
AT1G11480.2	AT1G11480.2	eukaryotic translation initiation factor-related ; eukaryotic translation initiation factor-related	0.999958	S	499	43.8084	0.000100354	76.332	49.659	76.332	10769000	6482300	5044600	8798700	7177700	0	5665000	4761100	0	0	5352100	9002300	0	6608700	0	5823600	0	8975300	3327900	7026100
AT1G11480.2	AT1G11480.2	eukaryotic translation initiation factor-related ; eukaryotic translation initiation factor-related	0.487561	S	533	0	0.000153305	72.34	33.378	72.34	0	0	0	0	0	0	0	0	0	0	0	0	0	0	0	0	0	0	0	0
AT1G11480.2	AT1G11480.2	eukaryotic translation initiation factor-related ; eukaryotic translation initiation factor-related	0.995037	S	535	23.3354	1.55759e-06	99.5	57.391	99.5	20364000	15740000	16047000	27825000	15662000	16430000	17560000	12096000	0	14847000	15600000	27259000	19759000	0	0	0	0	17571000	0	14795000
AT1G11480.2	AT1G11480.2	eukaryotic translation initiation factor-related ; eukaryotic translation initiation factor-related	0.927743	S	343	14.0958	0.00370173	61.641	40.904	61.641	6367100	5832200	6636400	12796000	8312800	6829200	8972000	0	5836100	0	0	5919400	6475500	6336500	4314800	5770100	2492300	0	2786400	5057900
AT1G11480.2	AT1G11480.2	eukaryotic translation initiation factor-related ; eukaryotic translation initiation factor-related	0.99493	S	213	23.1844	0.000856904	66.3	52.408	66.3	0	0	0	9404700	0	0	5398900	0	5165400	0	0	0	0	7947800	0	0	2455300	0	2350100	5982900
AT1G11480.2	AT1G11480.2	eukaryotic translation initiation factor-related ; eukaryotic translation initiation factor-related	0.999472	S	485	32.786	5.244e-05	88.187	64.437	88.187	11796000	5161000	3859600	11141000	10005000	8897100	0	4494600	9421800	0	3838300	14368000	8656000	4489600	0	10587000	0	6833200	0	0
AT1G11480.2	AT1G11480.2	eukaryotic translation initiation factor-related ; eukaryotic translation initiation factor-related	0.556455	S	427	3.99522	6.31223e-06	99.344	83.579	92.38	86929000	2854100	0	11455000	0	0	3497500	45108000	8223400	0	3932200	105000000	77968000	5599200	5620100	61256000	1965700	5584600	2815500	4505700
AT1G11480.2	AT1G11480.2	eukaryotic translation initiation factor-related ; eukaryotic translation initiation factor-related	0.601164	S	432	1.8124	6.69481e-06	98.508	98.508	57.788	0	0	0	36850000	22728000	21348000	16090000	10694000	0	13897000	10118000	0	27192000	22030000	9089400	13224000	3956900	15522000	5657800	9407000
AT1G11480.2	AT1G11480.2	eukaryotic translation initiation factor-related ; eukaryotic translation initiation factor-related	0.736347	S	433	5.24855	6.69481e-06	98.508	98.508	42.242	26451000	0	0	0	0	0	0	0	0	0	0	28535000	0	0	0	0	0	0	0	0
AT1G11660.1	AT1G11660.1	heat shock protein 70 (Hsp 70) family protein	0.996232	S	741	24.25	0.000823383	63.165	53.508	63.165	10023000	7014600	0	0	0	8797900	8872300	0	10372000	7023900	0	0	0	0	0	8990000	3386700	10006000	4445800	10350000
AT1G11670.1	AT1G11670.1	MATE efflux family protein	0.332758	S	19	0	0.00142888	46.558	37.071	46.558	0	0	0	0	0	0	0	0	0	0	0	0	0	0	0	0	0	0	0	0
AT1G11670.1	AT1G11670.1	MATE efflux family protein	0.982095	S	22	18.3527	2.69365e-72	213.35	200.29	213.35	0	0	10307000	37355000	12955000	17117000	0	4171700	4758600	253910	12147000	0	11553000	10892000	11140000	29451000	2429800	13465000	528710	8444400
AT1G11670.1	AT1G11670.1	MATE efflux family protein	0.332758	T	20	0	0.00142888	46.558	37.071	46.558	0	0	0	0	0	0	0	0	0	0	0	0	0	0	0	0	0	0	0	0
AT1G11700.1	AT1G11700.1	Protein of unknown function, DUF584	0.499993	S	114	0	0.000380959	70.26	51.948	70.26	2515000	0	0	0	0	0	0	0	0	0	0	0	0	0	0	0	0	0	0	0
AT1G11700.1	AT1G11700.1	Protein of unknown function, DUF584	0.625601	S	115	2.22998	0.000124871	84.759	63.53	84.759	2515000	0	0	5211400	3239800	0	0	0	1262000	0	0	0	3271300	1390700	2788000	4386800	0	0	0	0
AT1G11700.1	AT1G11700.1	Protein of unknown function, DUF584	0.99994	S	167	42.2064	2.33539e-05	81.494	69.628	76.073	0	4493100	4124200	5919800	0	4132000	0	4341400	3126700	4116500	3466300	5827700	0	3154100	4957000	0	1602600	3651500	1990100	0
AT1G11700.1	AT1G11700.1	Protein of unknown function, DUF584	0.333311	S	83	0	0.00636358	49.595	31.458	49.595	0	0	0	0	0	0	0	0	0	0	0	0	0	0	0	0	0	0	0	0
AT1G11700.1	AT1G11700.1	Protein of unknown function, DUF584	0.333311	S	84	0	0.00636358	49.595	31.458	49.595	0	0	0	0	0	0	0	0	0	0	0	0	0	0	0	0	0	0	0	0
AT1G11700.1	AT1G11700.1	Protein of unknown function, DUF584	0.333311	S	85	0	0.00636358	49.595	31.458	49.595	0	0	0	0	0	0	0	0	0	0	0	0	0	0	0	0	0	0	0	0
AT1G12000.1	AT1G12000.1	Phosphofructokinase family protein	1	S	16	90.4162	1.31185e-38	193.97	128.74	190.41	260880000	256560000	180080000	321980000	272170000	289810000	197100000	121350000	188290000	212660000	174350000	296650000	222850000	272390000	257570000	258040000	81670000	220360000	84563000	213530000
AT1G12270.1;AT1G62740.1	AT1G62740.1	stress-inducible protein, putative ; stress-inducible protein, putative	1	T	506	59.6073	0.00113182	81.185	33.564	59.607	7089500	8346100	0	22260000	15083000	0	0	432150	0	7597900	9477300	0	0	0	11208000	0	0	0	3116200	0
AT1G12360.1	AT1G12360.1	Sec1/munc18-like (SM) proteins superfamily	0.481533	Y	586	2.7101	0.0287936	54.598	38.707	54.598	0	0	0	0	0	0	0	0	0	0	0	0	0	0	0	0	0	0	0	0
AT1G12360.1	AT1G12360.1	Sec1/munc18-like (SM) proteins superfamily	0.999998	S	582	61.5234	1.83809e-05	113.29	87.629	91.657	38188000	55151000	24463000	63640000	36284000	49881000	35950000	18889000	25167000	29304000	22891000	47437000	42478000	34571000	33182000	41899000	10138000	31254000	11560000	31103000
AT1G12360.1	AT1G12360.1	Sec1/munc18-like (SM) proteins superfamily	0.767971	S	587	5.43523	3.3457e-08	122.64	58.976	122.64	6121300	5819100	0	11710000	8033800	10190000	4983700	12295000	5154900	5866600	3473600	8820600	7922000	6389700	0	7856500	1632900	0	0	4246100
AT1G12360.1	AT1G12360.1	Sec1/munc18-like (SM) proteins superfamily	0.94164	S	588	15.088	2.73961e-29	175.29	98.968	136.33	12934000	12204000	11947000	19727000	15525000	18455000	10820000	0	11946000	9280700	6545500	14818000	11328000	12810000	8530600	11714000	4279700	13437000	4770500	12224000
AT1G12360.1	AT1G12360.1	Sec1/munc18-like (SM) proteins superfamily	0.415394	S	2	0	0.00938051	44.294	28.07	44.294	0	0	0	0	0	0	0	0	0	0	0	0	0	0	0	0	0	0	0	0
AT1G12360.1	AT1G12360.1	Sec1/munc18-like (SM) proteins superfamily	0.984499	S	4	20.5339	2.25812e-05	106.52	83.804	73.834	6083700	4331000	0	2770100	2559300	4809400	5913900	3180500	4387400	3915000	0	6107000	4944300	4199000	1370700	5378000	0	0	1210400	4030000
AT1G12380.1	AT1G12380.1	unknown protein; BEST Arabidopsis thaliana protein match is: unknown protein (TAIR:AT1G62870.1); Has 173 Blast hits to 170 proteins in 34 species: Archae - 0; Bacteria - 4; Metazoa - 25; Fungi - 8; Plants - 123; Viruses - 7; Other Eukaryotes - 6 (source:	1	S	763	48.4666	0.00846426	50.088	13.491	48.467	2186500	0	9036600	14489000	8270000	8910400	0	1497200	781480	8662300	7305700	0	6127100	0	9616700	0	0	8308100	867380	0
AT1G12500.1	AT1G12500.1	Nucleotide-sugar transporter family protein	0.725834	T	33	9.81505	2.3835e-07	80.166	63.09	49.944	2763200	0	3463300	0	0	0	0	0	0	0	0	0	0	4088500	0	7491500	0	0	0	0
AT1G12530.1	AT1G12530.1	unknown protein; BEST Arabidopsis thaliana protein match is: unknown protein (TAIR:AT1G56420.1); Has 54 Blast hits to 53 proteins in 13 species: Archae - 0; Bacteria - 0; Metazoa - 0; Fungi - 0; Plants - 54; Viruses - 0; Other Eukaryotes - 0 (source: NCBI	0.817936	S	145	7.28372	0.000104619	75.819	49.033	75.819	5154900	3021400	4472700	4203700	3771700	4588700	2847800	0	0	2955400	2497000	0	0	0	3709700	0	1846700	5456600	2048500	4610300
AT1G12530.1	AT1G12530.1	unknown protein; BEST Arabidopsis thaliana protein match is: unknown protein (TAIR:AT1G56420.1); Has 54 Blast hits to 53 proteins in 13 species: Archae - 0; Bacteria - 0; Metazoa - 0; Fungi - 0; Plants - 54; Viruses - 0; Other Eukaryotes - 0 (source: NCBI	0.659216	T	144	3.83853	0.000249081	73.435	30.836	63.408	0	0	0	0	0	0	0	0	0	0	0	0	0	0	0	4919200	0	0	0	0
AT1G12700.1	AT1G12700.1	ATP binding;nucleic acid binding;helicases	0.999963	S	516	40.147	0.00760562	43.897	14.556	43.897	8083000	0	7023300	10541000	6977600	6002100	7251800	5017800	0	0	0	8268400	8247400	5415600	6318700	7029000	2604800	0	3946400	0
AT1G12700.1	AT1G12700.1	ATP binding;nucleic acid binding;helicases	0.691002	T	510	0.920719	0.00760562	43.897	14.556	43.897	8083000	0	7023300	10541000	6977600	6002100	7251800	5017800	0	0	0	8268400	8247400	5415600	6318700	7029000	2604800	0	3946400	0
AT1G12700.1	AT1G12700.1	ATP binding;nucleic acid binding;helicases	0.691002	T	512	0.920719	0.00760562	43.897	14.556	43.897	8083000	0	7023300	10541000	6977600	6002100	7251800	5017800	0	0	0	8268400	8247400	5415600	6318700	7029000	2604800	0	3946400	0
AT1G12760.2	AT1G12760.2	Zinc finger, C3HC4 type (RING finger) family protein ; Zinc finger, C3HC4 type (RING finger) family protein	0.999999	S	124	61.8558	3.6823e-25	158.06	137.81	130.32	26879000	29164000	26065000	49887000	32195000	30976000	32279000	19457000	22073000	22525000	22065000	29213000	39948000	27091000	22509000	35243000	8720100	28796000	10353000	24893000
AT1G12830.1	AT1G12830.1	unknown protein; FUNCTIONS IN: molecular_function unknown; INVOLVED IN: biological_process unknown; LOCATED IN: cellular_component unknown; EXPRESSED IN: 23 plant structures; EXPRESSED DURING: 13 growth stages; Has 39778 Blast hits to 22088 proteins in 10	0.940162	S	44	12.98	1.54307e-10	128.73	93.018	89.136	0	0	0	16845000	0	0	6865700	0	0	0	0	15779000	0	0	0	18415000	6061700	21094000	3700600	14265000
AT1G12830.1	AT1G12830.1	unknown protein; FUNCTIONS IN: molecular_function unknown; INVOLVED IN: biological_process unknown; LOCATED IN: cellular_component unknown; EXPRESSED IN: 23 plant structures; EXPRESSED DURING: 13 growth stages; Has 39778 Blast hits to 22088 proteins in 10	0.722828	S	46	5.27974	9.20559e-08	114.31	77.626	89.136	12093000	0	12846000	0	16595000	0	0	0	0	7838600	6718200	0	0	14960000	10880000	0	0	0	0	0
AT1G12850.1	AT1G12850.1	Phosphoglycerate mutase family protein	0.948596	S	111	12.6608	0.00082747	59.367	20.616	59.367	0	0	0	787520	0	0	1006000	0	0	0	673520	0	0	10494000	0	1999700	0	0	0	0
AT1G12850.1	AT1G12850.1	Phosphoglycerate mutase family protein ; Phosphoglycerate mutase family protein	0.327279	S	75	0	0.00198337	43.099	34.968	43.099	0	0	0	0	0	0	0	0	0	0	0	0	0	0	0	0	0	0	0	0
AT1G12850.1	AT1G12850.1	Phosphoglycerate mutase family protein ; Phosphoglycerate mutase family protein	0.327279	S	76	0	0.00198337	43.099	34.968	43.099	0	0	0	0	0	0	0	0	0	0	0	0	0	0	0	0	0	0	0	0
AT1G12850.1	AT1G12850.1	Phosphoglycerate mutase family protein ; Phosphoglycerate mutase family protein	0.327279	T	79	0	0.00198337	43.099	34.968	43.099	0	0	0	0	0	0	0	0	0	0	0	0	0	0	0	0	0	0	0	0
AT1G12910.1	AT1G12910.1	Transducin/WD40 repeat-like superfamily protein	0.84839	S	4	8.31329	2.91935e-13	145.52	128.08	145.52	0	9088600	0	0	12423000	11410000	0	0	8789400	7110200	0	0	0	0	7922900	10026000	0	11597000	0	8662500
AT1G12910.1	AT1G12910.1	Transducin/WD40 repeat-like superfamily protein	0.546494	S	5	0.950864	9.47413e-05	94.461	69.407	94.461	10768000	0	0	0	0	0	0	0	0	0	0	0	0	8140700	0	0	0	0	0	0
AT1G12910.1	AT1G12910.1	Transducin/WD40 repeat-like superfamily protein	0.543666	T	3	1.22159	1.14139e-08	133.66	116.22	133.66	0	0	0	0	0	0	0	5697400	0	0	5711800	0	10524000	0	0	0	0	0	0	0
AT1G12920.1	AT1G12920.1	eukaryotic release factor 1-2	0.963086	S	425	14.1689	1.9868e-72	183.96	179.32	183.96	0	0	3351600	3785300	4456500	5094800	5607200	2898600	3912900	0	1436800	7736100	0	0	1515700	0	0	0	593930	0
AT1G12920.1	AT1G12920.1	eukaryotic release factor 1-2	1	S	433	103.649	1.9868e-72	183.96	179.32	183.96	0	0	0	0	0	0	0	0	0	0	0	0	0	0	0	0	0	0	0	0
AT1G12920.1	AT1G12920.1	eukaryotic release factor 1-2	0.599873	T	420	2.3662	0.00031993	80.69	74.157	80.69	0	0	0	0	0	0	0	0	0	0	0	0	0	5715400	0	0	0	0	0	2097500
AT1G12920.1	AT1G12920.1	eukaryotic release factor 1-2	0.55073	T	427	1.17226	4.01258e-09	134.49	126.13	48.704	0	0	0	0	0	0	0	0	0	0	0	0	0	0	0	0	0	0	0	0
AT1G12930.1	AT1G12930.1	ARM repeat superfamily protein	0.316436	S	620	0	0.00516184	50.055	32.057	47.754	0	0	0	0	0	0	0	0	0	0	0	0	0	0	0	0	0	0	0	0
AT1G12930.1	AT1G12930.1	ARM repeat superfamily protein	0.354213	S	621	0	0.00516184	50.055	32.057	43.841	0	0	0	0	0	0	0	0	0	0	0	0	0	0	0	0	0	0	0	0
AT1G12930.1	AT1G12930.1	ARM repeat superfamily protein	0.434285	S	625	3.27243	0.00333327	54.768	37.398	54.768	0	0	0	0	0	0	0	0	0	0	0	0	0	0	0	0	0	0	0	0
AT1G12950.1	AT1G12950.1	root hair specific 2	0.999992	S	36	50.7434	0.000609172	67.456	51.794	56.225	0	2413100	0	0	0	0	3368800	0	0	2225300	0	0	0	0	0	3102800	0	0	1038500	0
AT1G13020.1	AT1G13020.1	eukaryotic initiation factor 4B2	0.972401	S	475	15.6155	0.00165395	67.456	39.975	67.456	15350000	8544500	23119000	12571000	6855700	12795000	6671200	9552900	9959500	6694800	10268000	13205000	10650000	17297000	11600000	17177000	8066000	2687800	12194000	14302000
AT1G13020.1	AT1G13020.1	eukaryotic initiation factor 4B2	0.999952	S	489	46.9392	0.00383253	55.452	31.109	55.452	12714000	9166000	0	12205000	8118300	14561000	6757700	8995600	13109000	3765100	9567900	11825000	17366000	17827000	12164000	13703000	5852700	1211900	9231900	12339000
AT1G13020.1	AT1G13020.1	eukaryotic initiation factor 4B2	0.443589	S	338	0	0.0158275	41.763	26.509	41.763	0	0	0	0	0	0	0	0	0	0	0	0	0	0	0	0	0	0	0	0
AT1G13020.1	AT1G13020.1	eukaryotic initiation factor 4B2	0.443589	S	339	0	0.0158275	41.763	26.509	41.763	0	0	0	0	0	0	0	0	0	0	0	0	0	0	0	0	0	0	0	0
AT1G13020.1	AT1G13020.1	eukaryotic initiation factor 4B2	0.891516	T	283	9.1688	2.49968e-38	182.89	146.44	182.89	37793000	32300000	42317000	67458000	41410000	29546000	48585000	42920000	35390000	32437000	25892000	69892000	48394000	40605000	38641000	43954000	15346000	38007000	22185000	29170000
AT1G13030.1	AT1G13030.1	sphere organelles protein-related	1	S	321	107.632	3.3193e-25	134.74	124.59	134.74	2858600	0	0	7645000	8292000	4809300	7189700	4499600	7271600	4266300	6519100	12290000	17526000	7370800	0	0	0	0	0	0
AT1G13030.1	AT1G13030.1	sphere organelles protein-related	0.999991	S	187	50.6199	4.19173e-43	193.88	174.56	178.15	26099000	29966000	44564000	64019000	41056000	59427000	25334000	25446000	53091000	24907000	22072000	55191000	66666000	34890000	31687000	46718000	12735000	47679000	12139000	38200000
AT1G13170.1	AT1G13170.1	OSBP(oxysterol binding protein)-related protein 1D ; OSBP(oxysterol binding protein)-related protein 1D	0.828238	S	61	6.83229	0.00761256	47.774	32.202	47.774	0	0	1196000	0	0	2145000	0	0	0	0	0	0	1049100	0	0	2259600	0	2190000	159130	1730300
AT1G13170.1	AT1G13170.1	OSBP(oxysterol binding protein)-related protein 1D ; OSBP(oxysterol binding protein)-related protein 1D	0.999969	S	236	47.1882	0.00442349	53.169	42.511	53.169	5997600	3249900	2319100	5115700	0	2922200	3531700	0	0	0	3241300	3038500	3595300	4142700	2003800	5818200	0	4564000	0	3735600
AT1G13210.1	AT1G13210.1	autoinhibited Ca2+/ATPase II	0.999994	S	29	52.46	4.64166e-05	94.632	76.769	94.632	4124300	4097500	6201000	8777400	5761200	5908900	5440900	2754100	0	2276100	3244900	7565800	0	5390000	4683500	3278900	1750600	4648200	1056200	0
AT1G13360.3	AT1G13360.3	unknown protein; FUNCTIONS IN: molecular_function unknown; INVOLVED IN: biological_process unknown; LOCATED IN: cellular_component unknown; BEST Arabidopsis thaliana protein match is: unknown protein (TAIR:AT3G25870.1). ; unknown protein; FUNCTIONS IN: mo	1	S	31	103.916	9.8188e-07	124.2	109.05	124.2	0	0	3929900	0	0	0	5653700	2966800	0	4145200	4571300	0	0	0	0	0	0	0	1465900	0
AT1G13450.3	AT1G13450.3	Homeodomain-like superfamily protein ; Homeodomain-like superfamily protein ; Homeodomain-like superfamily protein ; Homeodomain-like superfamily protein	0.972571	S	198	15.4972	0.0142632	41.54	24.908	41.54	0	5528400	2574300	5760100	3053700	5532100	4260200	3278500	2731000	3369800	2853700	6244700	2930400	2742500	2567300	4758900	2313500	3832700	3713500	4225400
AT1G13950.1	AT1G13950.1	eukaryotic elongation factor 5A-1	1	S	2	76.8365	1.92482e-19	157.91	30.072	119.37	0	0	0	0	0	0	0	0	0	0	0	0	0	0	0	0	0	0	43909000	0
AT1G14000.1	AT1G14000.1	VH1-interacting kinase	0.664733	S	23	6.18805	0.00134674	49.626	43.192	49.626	6203300	12419000	0	10202000	11259000	8721400	11960000	4708000	5241000	0	0	0	0	5988600	0	0	0	8273900	0	0
AT1G14000.1	AT1G14000.1	VH1-interacting kinase	0.451015	T	19	0.856479	0.00318852	46.403	36.52	46.403	0	0	0	0	0	0	0	0	0	0	0	0	0	0	0	0	0	0	0	0
AT1G14000.1	AT1G14000.1	VH1-interacting kinase	0.996349	T	324	25.7842	4.29652e-05	89.511	76.847	89.511	10507000	11891000	5519200	17966000	10967000	4224400	20185000	4839800	5824300	12062000	7426000	10700000	3178400	6020800	8611500	3577400	0	4587900	4917700	8909100
AT1G14380.2	AT1G14380.2	IQ-domain 28 ; IQ-domain 28 ; IQ-domain 28	0.993737	S	564	22.528	1.46125e-05	83.182	47.53	75.739	8748500	0	10208000	0	0	8471500	0	0	9775500	0	0	11652000	0	8530200	9300500	6917800	3450300	9734100	1706800	0
AT1G14380.2	AT1G14380.2	IQ-domain 28 ; IQ-domain 28 ; IQ-domain 28	0.803687	T	562	6.82034	0.000199106	70.942	52.906	70.942	0	0	0	0	9132200	0	0	0	0	0	0	0	9008300	0	0	0	0	0	0	0
AT1G14710.2	AT1G14710.2	hydroxyproline-rich glycoprotein family protein ; hydroxyproline-rich glycoprotein family protein	0.499981	S	463	0	0.00401594	52.451	36.945	52.451	6461100	6300000	0	0	3167200	0	0	0	2789700	3364700	1954700	9215900	1142300	558520	0	0	660820	2889000	0	0
AT1G14710.2	AT1G14710.2	hydroxyproline-rich glycoprotein family protein ; hydroxyproline-rich glycoprotein family protein	0.499981	S	465	0	0.00401594	52.451	36.945	52.451	6461100	6300000	0	0	3167200	0	0	0	2789700	3364700	1954700	9215900	1142300	558520	0	0	660820	2889000	0	0
AT1G14840.2	AT1G14840.2	microtubule-associated proteins 70-4 ; microtubule-associated proteins 70-4 ; microtubule-associated proteins 70-1	0.858198	S	430	7.82349	0.00123922	69.229	45.378	66.498	11794000	8672400	8180500	17758000	13162000	11640000	11335000	5582400	7707600	5991800	7777900	16666000	12084000	9257500	0	0	3329800	13807000	0	8318700
AT1G14850.1	AT1G14850.1	nucleoporin 155	0.997507	S	696	25.9981	0.00649905	53.327	10.991	53.327	5141300	5724300	1382200	0	0	4112400	4701400	0	5075200	4545500	0	4427000	4572000	0	0	0	0	3852300	2032700	0
AT1G14850.1	AT1G14850.1	nucleoporin 155	0.984823	S	703	18.1233	0.00649905	53.327	10.991	53.327	5141300	5724300	1382200	0	0	4112400	4701400	0	5075200	4545500	0	4427000	4572000	0	0	0	0	3852300	2032700	0
AT1G15210.1	AT1G15210.1	pleiotropic drug resistance 7	0.604671	S	68	1.8456	5.03257e-11	117.48	106.06	108.71	3459500	3458400	2620500	6313600	3898600	6167100	5651800	0	3767100	4927900	3265100	0	0	4412300	3051500	7645700	1023900	4739600	686260	3302300
AT1G15210.1	AT1G15210.1	pleiotropic drug resistance 7	1	S	10	75.4149	2.54479e-08	112.62	101.47	88.768	27216000	15309000	17408000	30483000	12546000	26907000	21432000	10877000	21223000	10630000	7565700	39563000	33698000	31443000	10641000	18976000	8337900	32585000	8139100	22990000
AT1G15210.1	AT1G15210.1	pleiotropic drug resistance 7	0.905261	S	37	11.4905	4.28051e-37	179.93	155.86	61.649	13416000	12150000	0	19411000	0	13924000	0	0	8201800	9650100	6619900	13563000	13294000	12897000	9157500	11603000	0	0	0	0
AT1G15210.1	AT1G15210.1	pleiotropic drug resistance 7	0.638865	S	38	4.79201	0.00431477	55.04	45.528	54.09	0	0	0	31787000	0	0	0	0	0	0	0	0	0	0	0	0	0	0	0	0
AT1G15210.1	AT1G15210.1	pleiotropic drug resistance 7	1	S	43	45.8289	2.0669e-05	94.09	69.369	45.829	30548000	11541000	15827000	31576000	18783000	23073000	16282000	10432000	15824000	9412100	10329000	28490000	27294000	24579000	11873000	19107000	9864500	27828000	6072600	22388000
AT1G15210.1	AT1G15210.1	pleiotropic drug resistance 7	0.791435	T	67	5.79175	5.03257e-11	117.48	106.06	95.622	0	0	2620500	6313600	3898600	6167100	5651800	0	3767100	4927900	3265100	7489300	10613000	4412300	3051500	7645700	1023900	4739600	686260	3302300
AT1G15210.1	AT1G15210.1	pleiotropic drug resistance 7	0.925828	T	36	12.2127	2.74231e-22	148.96	128.09	60.401	0	0	7117800	0	11530000	0	9980100	5063800	0	0	0	0	0	0	0	0	0	12672000	0	0
AT1G15230.1	AT1G15230.1	unknown protein; FUNCTIONS IN: molecular_function unknown; INVOLVED IN: biological_process unknown; LOCATED IN: cellular_component unknown; EXPRESSED IN: 24 plant structures; EXPRESSED DURING: 15 growth stages; Has 26 Blast hits to 26 proteins in 12 speci	1	S	138	111.147	7.32359e-08	111.15	99.835	111.15	1148300	1217700	2235700	1566500	5698600	0	5337900	707200	1808300	3923800	2557000	4855900	5492900	4905000	3616600	20549000	1381300	6138800	920880	6068700
AT1G15280.1	AT1G15280.1	CASC3/Barentsz eIF4AIII binding ; CASC3/Barentsz eIF4AIII binding	0.945674	S	4	12.4074	2.09539e-122	231.71	210.04	207.79	0	0	0	0	4048000	0	0	0	0	5283200	0	0	12947000	0	0	0	0	0	0	0
AT1G15280.1	AT1G15280.1	CASC3/Barentsz eIF4AIII binding ; CASC3/Barentsz eIF4AIII binding	1	S	10	92.4157	2.09539e-122	235.71	211.15	231.71	19764000	20471000	13689000	32542000	24618000	19369000	15594000	13883000	14809000	17922000	12600000	19470000	34702000	16158000	12707000	22498000	8042200	25604000	8130000	22210000
AT1G15280.1	AT1G15280.1	CASC3/Barentsz eIF4AIII binding ; CASC3/Barentsz eIF4AIII binding	1	S	49	144.511	5.27551e-110	251.56	188.4	208.4	24190000	19953000	19154000	47209000	33077000	71313000	16780000	12168000	19726000	7891500	10308000	49472000	38463000	28917000	27451000	68122000	3123400	38611000	4309200	26993000
AT1G15280.1	AT1G15280.1	CASC3/Barentsz eIF4AIII binding ; CASC3/Barentsz eIF4AIII binding	1	S	52	91.1114	5.27551e-110	251.56	188.4	208.4	24190000	18068000	19008000	47209000	33077000	73358000	21876000	11506000	19726000	11851000	10666000	44630000	44719000	29950000	27451000	71302000	3798800	34590000	5783800	29480000
AT1G15280.1	AT1G15280.1	CASC3/Barentsz eIF4AIII binding ; CASC3/Barentsz eIF4AIII binding	0.500049	T	3	0	1.68459e-46	178.14	150.56	141.86	0	0	0	0	4048000	0	0	0	0	5283200	0	0	12947000	0	0	0	0	0	0	0
AT1G15280.1	AT1G15280.1	CASC3/Barentsz eIF4AIII binding ; CASC3/Barentsz eIF4AIII binding	0.823965	T	219	6.71456	0.00581336	49.528	32.449	49.528	3039100	1859100	4810400	3995800	3095100	3568700	1242300	2585500	3139700	2234800	1300500	3921000	3317800	3116600	2390000	2845100	1187800	3758500	1412200	2120000
AT1G15340.1	AT1G15340.1	methyl-CPG-binding domain 10	0.946491	T	89	12.4747	0.000163153	80.534	64.643	63.037	4186400	2327400	2795900	24966000	5782600	6865800	0	1603900	3225000	2595600	0	4424800	5583000	4515200	3431100	3663100	0	4513400	1260200	5588400
AT1G15340.1	AT1G15340.1	methyl-CPG-binding domain 10	0.999953	T	91	42.9789	0.000163153	80.534	64.643	80.534	4186400	2327400	2795900	7607200	5782600	6865800	0	1603900	3225000	2595600	0	4424800	5583000	4515200	3431100	3663100	0	4513400	1260200	5588400
AT1G15400.2	AT1G15400.2	unknown protein; FUNCTIONS IN: molecular_function unknown; INVOLVED IN: biological_process unknown; LOCATED IN: plasma membrane; EXPRESSED IN: 23 plant structures; EXPRESSED DURING: 13 growth stages; BEST Arabidopsis thaliana protein match is: unknown pro	0.996759	S	16	24.8797	1.37743e-41	184.76	135.78	154.65	66790000	40467000	43168000	84240000	61224000	71453000	53427000	37638000	47193000	41687000	43285000	86406000	74999000	45189000	44184000	53793000	19142000	60489000	22041000	44304000
AT1G15400.2	AT1G15400.2	unknown protein; FUNCTIONS IN: molecular_function unknown; INVOLVED IN: biological_process unknown; LOCATED IN: plasma membrane; EXPRESSED IN: 23 plant structures; EXPRESSED DURING: 13 growth stages; BEST Arabidopsis thaliana protein match is: unknown pro	1	S	100	43.1836	1.31786e-08	127.88	101.76	43.184	73219000	46349000	41778000	94943000	61859000	72658000	62887000	30091000	51804000	42289000	42371000	87759000	79936000	64081000	58487000	58720000	19045000	59208000	20190000	46450000
AT1G15400.2	AT1G15400.2	unknown protein; FUNCTIONS IN: molecular_function unknown; INVOLVED IN: biological_process unknown; LOCATED IN: plasma membrane; EXPRESSED IN: 23 plant structures; EXPRESSED DURING: 13 growth stages; BEST Arabidopsis thaliana protein match is: unknown pro	1	S	107	43.1836	1.31786e-08	127.88	101.76	43.184	99229000	75849000	57193000	126400000	85782000	95426000	92662000	43617000	66110000	63641000	42371000	115310000	103670000	84423000	76615000	85946000	29067000	82601000	32446000	64658000
AT1G15440.2	AT1G15440.2	periodic tryptophan protein 2 ; periodic tryptophan protein 2	1	S	235	244.445	0	358.12	334.36	268.12	0	0	0	0	0	0	0	0	0	0	0	0	0	0	0	0	0	0	0	0
AT1G15440.2	AT1G15440.2	periodic tryptophan protein 2 ; periodic tryptophan protein 2	1	S	653	105.606	7.42681e-262	342.14	323.69	126.61	36121000	19274000	26683000	74402000	30624000	48232000	5270900	6919000	29295000	16469000	15167000	42580000	52610000	37181000	32508000	75995000	6871000	43077000	3279500	19102000
AT1G15750.4	AT1G15750.4	Transducin family protein / WD-40 repeat family protein ; Transducin family protein / WD-40 repeat family protein ; Transducin family protein / WD-40 repeat family protein ; Transducin family protein / WD-40 repeat family protein	1	S	214	194.193	5.63249e-153	287.78	242.95	194.19	55558000	49046000	43753000	132180000	68705000	86033000	37929000	26278000	61419000	55800000	54608000	90390000	84731000	71408000	49237000	212870000	21025000	105360000	11752000	46477000
AT1G15750.4	AT1G15750.4	Transducin family protein / WD-40 repeat family protein ; Transducin family protein / WD-40 repeat family protein ; Transducin family protein / WD-40 repeat family protein ; Transducin family protein / WD-40 repeat family protein	0.9057	S	684	10.4621	3.32677e-14	143.05	117.01	91.789	10146000	10590000	7161300	15377000	8562300	10532000	8507700	0	9004500	6604100	5490300	14864000	11303000	8361400	5602800	8887500	0	11105000	0	8335700
AT1G15750.4	AT1G15750.4	Transducin family protein / WD-40 repeat family protein ; Transducin family protein / WD-40 repeat family protein ; Transducin family protein / WD-40 repeat family protein ; Transducin family protein / WD-40 repeat family protein	0.407049	S	685	0	0.000889377	58.831	41.805	58.831	0	0	0	0	0	0	0	0	0	0	0	0	0	0	0	0	0	0	0	0
AT1G15750.4	AT1G15750.4	Transducin family protein / WD-40 repeat family protein ; Transducin family protein / WD-40 repeat family protein ; Transducin family protein / WD-40 repeat family protein ; Transducin family protein / WD-40 repeat family protein	0.3069	S	687	0	4.53897e-05	75.479	49.361	75.479	0	0	0	0	0	0	0	0	0	0	0	0	0	0	0	0	0	0	0	0
AT1G15750.4	AT1G15750.4	Transducin family protein / WD-40 repeat family protein ; Transducin family protein / WD-40 repeat family protein ; Transducin family protein / WD-40 repeat family protein ; Transducin family protein / WD-40 repeat family protein	0.3069	S	688	0	4.53897e-05	75.479	49.361	75.479	0	0	0	0	0	0	0	0	0	0	0	0	0	0	0	0	0	0	0	0
AT1G15750.4	AT1G15750.4	Transducin family protein / WD-40 repeat family protein ; Transducin family protein / WD-40 repeat family protein ; Transducin family protein / WD-40 repeat family protein ; Transducin family protein / WD-40 repeat family protein	0.943334	S	705	12.2134	1.65046e-67	222.26	211.86	182.4	26457000	28969000	25659000	47990000	38390000	45419000	32315000	17166000	24719000	29066000	20086000	43388000	37464000	29747000	22827000	37000000	4248000	55298000	3331600	23844000
AT1G15750.4	AT1G15750.4	Transducin family protein / WD-40 repeat family protein ; Transducin family protein / WD-40 repeat family protein ; Transducin family protein / WD-40 repeat family protein ; Transducin family protein / WD-40 repeat family protein	0.998138	T	286	27.336	4.6792e-33	168.98	155.53	168.98	37351000	30348000	38268000	67539000	51014000	47192000	47651000	37150000	36149000	47086000	34300000	55189000	46091000	48679000	31726000	42927000	10247000	49977000	10136000	30635000
AT1G15750.4	AT1G15750.4	Transducin family protein / WD-40 repeat family protein ; Transducin family protein / WD-40 repeat family protein ; Transducin family protein / WD-40 repeat family protein ; Transducin family protein / WD-40 repeat family protein	0.518707	T	289	1.59219	4.75456e-06	94.384	85.051	94.384	0	0	0	0	0	0	0	0	35584000	0	0	0	0	0	34176000	0	0	0	0	0
AT1G15930.2	AT1G15930.2	Ribosomal protein L7Ae/L30e/S12e/Gadd45 family protein ; Ribosomal protein L7Ae/L30e/S12e/Gadd45 family protein	0.993677	S	135	24.9732	0.00191723	61.657	49.598	61.657	0	0	0	0	4284700	0	0	0	2704200	2777500	2577900	0	2298000	0	1607500	3120600	0	0	0	1196100
AT1G15930.2	AT1G15930.2	Ribosomal protein L7Ae/L30e/S12e/Gadd45 family protein ; Ribosomal protein L7Ae/L30e/S12e/Gadd45 family protein	1	S	2	67.3447	5.67865e-07	67.72	62.863	67.72	0	0	0	0	0	0	0	196460	0	0	0	0	0	0	0	10147000	0	0	0	0
AT1G15940.1	AT1G15940.1	Tudor/PWWP/MBT superfamily protein	1	S	836	48.8985	0.000345565	83.966	72.493	48.899	7245700	0	8812700	7371800	7199000	8345400	4719700	5670000	8051600	0	3244700	8505700	9562400	7898100	3205100	5336500	1487900	8688600	778080	3235600
AT1G15940.1	AT1G15940.1	Tudor/PWWP/MBT superfamily protein	0.746364	S	290	4.68741	0.000108794	87.094	54.679	87.094	7365800	8989700	11639000	21187000	12920000	0	0	7064000	10170000	5252300	5885300	13399000	10686000	0	10059000	10214000	3994000	0	3159800	0
AT1G15940.1	AT1G15940.1	Tudor/PWWP/MBT superfamily protein	0.999999	S	768	59.6547	7.98227e-05	63.848	55.817	63.848	0	13013000	12442000	20255000	13395000	20561000	11160000	11688000	11415000	12773000	7020100	20002000	0	10680000	9829200	18037000	0	15963000	0	0
AT1G15950.2	AT1G15950.2	cinnamoyl coa reductase 1 ; cinnamoyl coa reductase 1	1	S	7	41.5399	0.0142632	41.54	33.615	41.54	0	0	0	5164700	3460400	0	0	0	4616200	4578800	4781900	6454200	0	6770800	6370300	0	0	9507900	5288200	7047300
AT1G16010.3	AT1G16010.3	magnesium transporter 2 ; magnesium transporter 2 ; magnesium transporter 2	0.499862	S	161	0	0.00102908	58.49	50.686	57.484	0	0	0	0	0	0	0	0	0	0	0	0	0	0	0	0	0	0	0	0
AT1G16010.3	AT1G16010.3	magnesium transporter 2 ; magnesium transporter 2 ; magnesium transporter 2	0.499862	S	163	0	0.00102908	58.49	50.686	57.484	0	0	0	0	0	0	0	0	0	0	0	0	0	0	0	0	0	0	0	0
AT1G16170.1	AT1G16170.1	unknown protein; FUNCTIONS IN: molecular_function unknown; INVOLVED IN: biological_process unknown; LOCATED IN: cellular_component unknown; EXPRESSED IN: 24 plant structures; EXPRESSED DURING: 15 growth stages; BEST Arabidopsis thaliana protein match is:	0.747558	S	8	4.89929	5.95797e-14	138.02	102.5	86.803	0	0	0	38468000	21289000	0	27630000	10276000	0	16319000	17852000	27073000	24874000	0	0	0	0	19640000	16697000	0
AT1G16170.1	AT1G16170.1	unknown protein; FUNCTIONS IN: molecular_function unknown; INVOLVED IN: biological_process unknown; LOCATED IN: cellular_component unknown; EXPRESSED IN: 24 plant structures; EXPRESSED DURING: 15 growth stages; BEST Arabidopsis thaliana protein match is:	0.805203	S	9	8.24034	1.67609e-10	118.37	82.721	91.858	23722000	0	17003000	0	0	0	0	0	0	0	0	0	0	17705000	18489000	0	0	0	0	0
AT1G16170.1	AT1G16170.1	unknown protein; FUNCTIONS IN: molecular_function unknown; INVOLVED IN: biological_process unknown; LOCATED IN: cellular_component unknown; EXPRESSED IN: 24 plant structures; EXPRESSED DURING: 15 growth stages; BEST Arabidopsis thaliana protein match is:	0.333333	S	11	0	0.0023461	56.225	39.199	56.225	0	0	0	0	0	0	0	0	0	0	0	0	0	0	0	0	0	0	0	0
AT1G16180.2	AT1G16180.2	Serinc-domain containing serine and sphingolipid biosynthesis protein ; Serinc-domain containing serine and sphingolipid biosynthesis protein	0.997424	S	314	26.3302	0.000203879	80.318	59.089	51.888	5699200	5232100	4814400	8521200	5539900	7588100	7730100	4818700	5676800	5046800	4361000	5420000	6625400	5978600	7916900	0	2727500	6384100	2625300	5791600
AT1G16190.1	AT1G16190.1	Rad23 UV excision repair protein family	0.489669	S	200	1.30432	0.00613361	41.087	34.488	41.087	0	0	0	0	0	0	0	0	0	0	0	0	0	0	0	0	0	0	0	0
AT1G16270.2	AT1G16270.2	Protein kinase superfamily protein with octicosapeptide/Phox/Bem1p domain ; Protein kinase superfamily protein with octicosapeptide/Phox/Bem1p domain	0.999758	S	611	36.839	1.79759e-20	135.75	126.12	123.95	17768000	14138000	10879000	34488000	17781000	21912000	13847000	6658700	9931100	11442000	0	17269000	12658000	14363000	12743000	12227000	0	12446000	0	10724000
AT1G16270.2	AT1G16270.2	Protein kinase superfamily protein with octicosapeptide/Phox/Bem1p domain ; Protein kinase superfamily protein with octicosapeptide/Phox/Bem1p domain	0.999749	S	683	35.9973	0.00374713	49.35	27.219	49.35	8931500	6060100	7420300	0	8119400	9169600	6299500	0	4716700	0	6393900	8670400	8639200	7123200	6596300	10556000	0	0	0	0
AT1G16270.2	AT1G16270.2	Protein kinase superfamily protein with octicosapeptide/Phox/Bem1p domain ; Protein kinase superfamily protein with octicosapeptide/Phox/Bem1p domain	0.998433	S	671	30.2807	3.23682e-05	79.614	49.688	79.614	27521000	17050000	0	32738000	24711000	22221000	17313000	12081000	15542000	16175000	14571000	28693000	18801000	16328000	0	17552000	6566300	0	6708000	15576000
AT1G16270.2	AT1G16270.2	Protein kinase superfamily protein with octicosapeptide/Phox/Bem1p domain ; Protein kinase superfamily protein with octicosapeptide/Phox/Bem1p domain	0.33173	S	309	0	0.00040554	64.83	51.693	64.83	0	0	0	0	0	0	0	0	0	0	0	0	0	0	0	0	0	0	0	0
AT1G16270.2	AT1G16270.2	Protein kinase superfamily protein with octicosapeptide/Phox/Bem1p domain ; Protein kinase superfamily protein with octicosapeptide/Phox/Bem1p domain	0.33173	S	310	0	0.00040554	64.83	51.693	64.83	0	0	0	0	0	0	0	0	0	0	0	0	0	0	0	0	0	0	0	0
AT1G16270.2	AT1G16270.2	Protein kinase superfamily protein with octicosapeptide/Phox/Bem1p domain ; Protein kinase superfamily protein with octicosapeptide/Phox/Bem1p domain	0.33173	S	311	0	0.00040554	64.83	51.693	64.83	0	0	0	0	0	0	0	0	0	0	0	0	0	0	0	0	0	0	0	0
AT1G16270.2	AT1G16270.2	Protein kinase superfamily protein with octicosapeptide/Phox/Bem1p domain ; Protein kinase superfamily protein with octicosapeptide/Phox/Bem1p domain	1	S	780	67.1761	0.000133859	91.657	76.684	91.657	6284700	5402700	5445200	10779000	5946800	8245400	8720200	4171300	0	3977200	5465700	8963600	9052800	2968000	5737200	9201600	2398400	8449700	1973400	5286800
AT1G16270.2;AT1G79570.1	AT1G16270.2	Protein kinase superfamily protein with octicosapeptide/Phox/Bem1p domain ; Protein kinase superfamily protein with octicosapeptide/Phox/Bem1p domain ; PB1 domain-containing protein tyrosine kinase ; Protein kinase superfamily protein with octicosapeptide	0.999503	T	1024	33.0371	0.0087628	57.96	31.287	57.96	9925200	7808500	11025000	16515000	13824000	12048000	11302000	7567900	15912000	10830000	7328300	12209000	9402900	12501000	11728000	13724000	5442100	12530000	6084900	11646000
AT1G16520.1	AT1G16520.1	unknown protein; FUNCTIONS IN: molecular_function unknown; INVOLVED IN: biological_process unknown; LOCATED IN: plasma membrane; EXPRESSED IN: 22 plant structures; EXPRESSED DURING: 13 growth stages; BEST Arabidopsis thaliana protein match is: unknown pro	0.206281	S	236	0	0.0128564	43.024	26.718	43.024	0	0	0	0	0	0	0	0	0	0	0	0	0	0	0	0	0	0	0	0
AT1G16520.1	AT1G16520.1	unknown protein; FUNCTIONS IN: molecular_function unknown; INVOLVED IN: biological_process unknown; LOCATED IN: plasma membrane; EXPRESSED IN: 22 plant structures; EXPRESSED DURING: 13 growth stages; BEST Arabidopsis thaliana protein match is: unknown pro	0.206281	S	237	0	0.0128564	43.024	26.718	43.024	0	0	0	0	0	0	0	0	0	0	0	0	0	0	0	0	0	0	0	0
AT1G16520.1	AT1G16520.1	unknown protein; FUNCTIONS IN: molecular_function unknown; INVOLVED IN: biological_process unknown; LOCATED IN: plasma membrane; EXPRESSED IN: 22 plant structures; EXPRESSED DURING: 13 growth stages; BEST Arabidopsis thaliana protein match is: unknown pro	0.206281	S	240	0	0.0128564	43.024	26.718	43.024	0	0	0	0	0	0	0	0	0	0	0	0	0	0	0	0	0	0	0	0
AT1G16520.1	AT1G16520.1	unknown protein; FUNCTIONS IN: molecular_function unknown; INVOLVED IN: biological_process unknown; LOCATED IN: plasma membrane; EXPRESSED IN: 22 plant structures; EXPRESSED DURING: 13 growth stages; BEST Arabidopsis thaliana protein match is: unknown pro	0.360759	S	241	0	0.0106874	44.005	31.737	44.005	0	0	0	0	0	0	0	0	0	0	0	0	0	0	0	0	0	0	0	0
AT1G16520.1	AT1G16520.1	unknown protein; FUNCTIONS IN: molecular_function unknown; INVOLVED IN: biological_process unknown; LOCATED IN: plasma membrane; EXPRESSED IN: 22 plant structures; EXPRESSED DURING: 13 growth stages; BEST Arabidopsis thaliana protein match is: unknown pro	0.925709	S	245	14.5125	1.59792e-05	89.484	71.348	86.803	6657100	6406900	4091700	8527900	5057100	7880000	5231300	1591400	0	0	3752600	6028100	7213400	2987500	0	3675900	0	5028200	0	4897900
AT1G16520.1	AT1G16520.1	unknown protein; FUNCTIONS IN: molecular_function unknown; INVOLVED IN: biological_process unknown; LOCATED IN: plasma membrane; EXPRESSED IN: 22 plant structures; EXPRESSED DURING: 13 growth stages; BEST Arabidopsis thaliana protein match is: unknown pro	0.998886	S	191	30.2497	0.000489144	68.069	54.932	61.435	3509900	0	2665600	5572800	4012700	4961300	0	2085900	2233000	0	2334100	4118200	3239700	2307400	0	0	926170	3166100	1048600	2881800
AT1G16520.1	AT1G16520.1	unknown protein; FUNCTIONS IN: molecular_function unknown; INVOLVED IN: biological_process unknown; LOCATED IN: plasma membrane; EXPRESSED IN: 22 plant structures; EXPRESSED DURING: 13 growth stages; BEST Arabidopsis thaliana protein match is: unknown pro	0.315749	S	206	0	0.0152291	43.282	8.5611	43.282	0	0	0	0	0	0	0	0	0	0	0	0	0	0	0	0	0	0	0	0
AT1G16520.1	AT1G16520.1	unknown protein; FUNCTIONS IN: molecular_function unknown; INVOLVED IN: biological_process unknown; LOCATED IN: plasma membrane; EXPRESSED IN: 22 plant structures; EXPRESSED DURING: 13 growth stages; BEST Arabidopsis thaliana protein match is: unknown pro	0.315749	S	208	0	0.0152291	43.282	8.5611	43.282	0	0	0	0	0	0	0	0	0	0	0	0	0	0	0	0	0	0	0	0
AT1G16520.1	AT1G16520.1	unknown protein; FUNCTIONS IN: molecular_function unknown; INVOLVED IN: biological_process unknown; LOCATED IN: plasma membrane; EXPRESSED IN: 22 plant structures; EXPRESSED DURING: 13 growth stages; BEST Arabidopsis thaliana protein match is: unknown pro	0.315749	T	205	0	0.0152291	43.282	8.5611	43.282	0	0	0	0	0	0	0	0	0	0	0	0	0	0	0	0	0	0	0	0
AT1G16610.2	AT1G16610.2	arginine/serine-rich 45 ; arginine/serine-rich 45 ; arginine/serine-rich 45	1	S	77	89.3689	1.49098e-22	150.14	110.96	124.12	52963000	28726000	56507000	41343000	29528000	47037000	32497000	34752000	40844000	25970000	31620000	40476000	46775000	43781000	31190000	60435000	25773000	42468000	36013000	52752000
AT1G16610.2	AT1G16610.2	arginine/serine-rich 45 ; arginine/serine-rich 45 ; arginine/serine-rich 45	1	S	199	52.5411	0.000127714	88.755	65.952	52.541	3990200	2633500	2868800	4654000	2657900	3384200	2128200	1951700	3154700	2314100	2063300	3061900	3464000	4084200	2769800	2272800	1028200	2738700	1512800	2473600
AT1G16610.2	AT1G16610.2	arginine/serine-rich 45 ; arginine/serine-rich 45 ; arginine/serine-rich 45	1	S	225	49.7151	0.0225042	50.04	20.467	49.715	76610000	39150000	93661000	68030000	48710000	68230000	50703000	50896000	67916000	51773000	52302000	62764000	74404000	93189000	60377000	0	39549000	80959000	0	205130
AT1G16610.2	AT1G16610.2	arginine/serine-rich 45 ; arginine/serine-rich 45 ; arginine/serine-rich 45	0.99595	S	183	23.9139	8.05447e-07	112.08	88.012	93.228	558780000	374770000	418070000	641720000	498440000	487370000	469700000	314700000	461140000	384200000	279650000	705960000	669400000	496230000	435730000	611210000	185600000	743280000	210150000	487640000
AT1G16610.2	AT1G16610.2	arginine/serine-rich 45 ; arginine/serine-rich 45 ; arginine/serine-rich 45	0.999846	S	282	38.1196	0.00015735	78.324	62.07	76.357	337510000	193090000	330160000	331630000	193360000	306500000	217630000	162510000	271470000	167150000	151640000	290220000	292730000	298700000	206800000	206710000	75813000	221510000	110410000	246920000
AT1G16610.2	AT1G16610.2	arginine/serine-rich 45 ; arginine/serine-rich 45 ; arginine/serine-rich 45	0.999997	S	287	55.6034	0.00015735	78.324	62.07	78.324	337510000	193090000	330160000	331630000	193360000	306500000	217630000	162510000	271470000	167150000	151640000	290220000	292730000	298700000	206800000	206710000	75813000	221510000	110410000	246920000
AT1G16860.1	AT1G16860.1	Ubiquitin-specific protease family C19-related protein	1	S	169	79.0399	4.86101e-15	144.08	126.86	143.28	43413000	47762000	43911000	63266000	40176000	56481000	48776000	24191000	29694000	34672000	24999000	51694000	55081000	44930000	42432000	44620000	16681000	50409000	17510000	36644000
AT1G16860.1	AT1G16860.1	Ubiquitin-specific protease family C19-related protein	0.99933	S	95	31.7581	1.26947e-06	121.26	102.43	116.13	7767000	8384300	6233200	11335000	7467400	0	8532000	0	0	6023900	0	11329000	11323000	7168200	6387900	9441100	0	9783400	0	0
AT1G16860.1	AT1G16860.1	Ubiquitin-specific protease family C19-related protein	0.617046	S	97	2.29074	0.00223934	55.546	43.854	55.546	0	0	0	0	0	10455000	0	3692200	6150100	0	3901900	0	0	0	0	0	0	0	0	5065600
AT1G16860.1	AT1G16860.1	Ubiquitin-specific protease family C19-related protein	0.384072	S	103	0.674939	0.00584636	47.639	36.881	47.639	0	0	0	0	0	0	0	0	0	0	0	0	0	0	0	0	0	0	0	0
AT1G16860.1	AT1G16860.1	Ubiquitin-specific protease family C19-related protein	0.970915	S	105	16.0917	3.04505e-20	166.92	144.2	116.13	21786000	12849000	11793000	26971000	16485000	23717000	10920000	3692200	15714000	13679000	7110100	27084000	25492000	20623000	6387900	15231000	3851900	24468000	5188900	18683000
AT1G16860.1	AT1G16860.1	Ubiquitin-specific protease family C19-related protein	0.499992	S	137	0	1.60527e-08	75.758	67.457	75.758	0	650740	606260	0	0	1040500	0	223160	426900	0	0	0	0	825410	442580	3677100	0	0	0	0
AT1G16860.1	AT1G16860.1	Ubiquitin-specific protease family C19-related protein	0.499992	S	139	0	1.60527e-08	75.758	67.457	75.758	0	650740	606260	0	0	1040500	0	223160	426900	0	0	0	0	825410	442580	3677100	0	0	0	0
AT1G16860.1	AT1G16860.1	Ubiquitin-specific protease family C19-related protein	0.963088	S	64	13.5301	0.00250554	40.049	27.09	40.049	0	0	1983900	13287000	0	0	6272000	0	0	0	0	0	0	0	0	3866000	0	0	0	3406200
AT1G16860.1	AT1G16860.1	Ubiquitin-specific protease family C19-related protein	0.625084	S	72	0.357885	0.00143017	42.659	35.547	40.049	0	0	1983900	13287000	0	0	6272000	0	0	0	0	0	0	0	0	3866000	0	0	0	3406200
AT1G16860.1	AT1G16860.1	Ubiquitin-specific protease family C19-related protein	0.649639	S	74	0.71247	6.00408e-51	208.4	186.57	40.049	0	20294000	1983900	13287000	29658000	33919000	6272000	12824000	0	17568000	15223000	0	0	27734000	0	26670000	9428300	35306000	9932800	3406200
AT1G16860.1	AT1G16860.1	Ubiquitin-specific protease family C19-related protein	0.954772	S	76	13.2449	7.21958e-64	221.86	202.1	221.86	29832000	20294000	25144000	58481000	29658000	33919000	37559000	12824000	23998000	17568000	15223000	33645000	34222000	0	22329000	26670000	9428300	0	9932800	25145000
AT1G16860.1	AT1G16860.1	Ubiquitin-specific protease family C19-related protein	0.459128	T	80	0	0.00143017	42.659	35.547	42.659	0	0	0	0	0	0	0	0	0	0	0	0	0	0	0	0	0	0	0	0
AT1G16970.1	AT1G16970.1	KU70 homolog	0.965927	S	553	14.5253	7.13858e-49	207.43	173.12	147.17	17622000	12457000	15352000	26720000	20311000	20920000	13425000	8013900	11910000	11396000	10520000	17638000	17928000	14135000	12139000	12410000	3838400	15308000	3852700	11530000
AT1G16970.1	AT1G16970.1	KU70 homolog	0.565728	S	555	1.14893	0.0243589	49.463	39.182	49.463	0	0	0	6470900	0	4654900	0	0	0	0	0	0	0	0	0	0	0	0	0	0
AT1G17030.1	AT1G17030.1	unknown protein; FUNCTIONS IN: molecular_function unknown; INVOLVED IN: biological_process unknown; LOCATED IN: endomembrane system; BEST Arabidopsis thaliana protein match is: unknown protein (TAIR:AT2G47010.2); Has 70 Blast hits to 70 proteins in 13 spe	0.922089	Y	276	10.5184	0.0125774	43.991	15.178	40.577	0	0	0	0	0	0	0	0	0	0	0	0	0	0	0	0	0	0	0	0
AT1G17030.1	AT1G17030.1	unknown protein; FUNCTIONS IN: molecular_function unknown; INVOLVED IN: biological_process unknown; LOCATED IN: endomembrane system; BEST Arabidopsis thaliana protein match is: unknown protein (TAIR:AT2G47010.2); Has 70 Blast hits to 70 proteins in 13 spe	0.928238	S	273	10.8882	0.0125774	43.991	15.178	40.577	0	0	0	0	0	0	0	0	0	0	0	0	0	0	0	0	0	0	0	0
AT1G17030.1	AT1G17030.1	unknown protein; FUNCTIONS IN: molecular_function unknown; INVOLVED IN: biological_process unknown; LOCATED IN: endomembrane system; BEST Arabidopsis thaliana protein match is: unknown protein (TAIR:AT2G47010.2); Has 70 Blast hits to 70 proteins in 13 spe	0.865375	T	280	8.25445	0.0125774	43.991	15.178	43.991	0	0	0	0	0	0	0	0	0	0	0	0	0	0	0	0	0	0	0	0
AT1G17130.1	AT1G17130.1	Family of unknown function (DUF572) ; Family of unknown function (DUF572)	0.986251	S	250	19.1057	7.66523e-15	131.67	109.86	131.67	0	2362700	3492100	4942200	3122200	4709700	2269400	2252600	0	0	0	0	3147200	1969500	2864700	0	0	2814400	1363100	3381900
AT1G17130.1	AT1G17130.1	Family of unknown function (DUF572) ; Family of unknown function (DUF572)	1	S	326	69.5515	5.65358e-44	189.84	178.05	189.84	3281600	2430300	3165100	6214900	6708600	3881900	3041800	1411000	2398200	2756200	0	5725900	2697300	0	2808400	8540600	0	3691100	0	0
AT1G17130.1	AT1G17130.1	Family of unknown function (DUF572) ; Family of unknown function (DUF572)	0.494318	T	247	0.725435	2.09932e-06	99.508	79.14	72.417	0	0	0	0	0	0	0	0	0	0	0	0	0	0	0	0	0	0	0	0
AT1G17210.1	AT1G17210.1	IAP-like protein 1	1	S	505	91.7658	2.25091e-86	224.56	208.28	211.19	94237000	71234000	55779000	98099000	99968000	127200000	84491000	38797000	66584000	68789000	55507000	103040000	97668000	72498000	52204000	71110000	18311000	84285000	25600000	64323000
AT1G17210.1	AT1G17210.1	IAP-like protein 1	0.958101	S	522	14.839	7.1332e-05	64.342	49.457	64.342	7798400	8303200	7735100	11711000	9869700	14240000	8094300	4580800	4441000	5268200	4583800	6033500	6184000	7260500	5941600	8731800	0	8500700	1973800	5672900
AT1G17210.1	AT1G17210.1	IAP-like protein 1	1	S	322	81.5573	2.82868e-25	149.52	117.69	136.85	1350100	1732500	0	0	0	2635100	1893200	1211900	1419300	2588700	0	3485200	4699100	1905300	0	2201500	983160	3150300	725460	2069000
AT1G17210.1	AT1G17210.1	IAP-like protein 1	0.69459	S	552	3.56876	4.93256e-05	97.579	65.056	97.579	0	0	0	0	0	0	0	9946500	0	0	0	0	0	0	0	0	0	0	0	0
AT1G17210.1	AT1G17210.1	IAP-like protein 1	0.998944	S	554	29.7618	7.47326e-64	216.67	170.32	139.88	61512000	60348000	57183000	117660000	91963000	94527000	86120000	43343000	51399000	77596000	63480000	108100000	69727000	72007000	61309000	67195000	24449000	91870000	26633000	67346000
AT1G17210.1	AT1G17210.1	IAP-like protein 1	0.499648	S	664	0	8.5572e-05	61.109	54.385	61.109	0	0	0	0	0	0	0	0	0	0	0	0	0	0	0	0	0	0	0	0
AT1G17210.1	AT1G17210.1	IAP-like protein 1	0.499648	S	665	0	8.5572e-05	61.109	54.385	61.109	0	0	0	0	0	0	0	0	0	0	0	0	0	0	0	0	0	0	0	0
AT1G17210.1	AT1G17210.1	IAP-like protein 1	1	S	787	76.6242	1.12274e-48	207.1	173.24	180.04	14364000	22060000	0	38381000	23166000	0	21029000	5347000	8827000	14996000	9761500	18076000	0	10645000	21689000	11769000	2530200	0	5272600	14239000
AT1G17210.1	AT1G17210.1	IAP-like protein 1	1	S	790	88.7439	1.12274e-48	207.1	173.24	123.14	14364000	22060000	0	38381000	23166000	0	21029000	5347000	8827000	14996000	9761500	18076000	0	10645000	21689000	11769000	2530200	0	5272600	14239000
AT1G17210.1	AT1G17210.1	IAP-like protein 1	0.999997	S	762	55.0932	4.55323e-05	81.643	63.047	81.643	10185000	37587000	29095000	55486000	46897000	53453000	39155000	24263000	30141000	31656000	22313000	13514000	40886000	30938000	35215000	41764000	12467000	39961000	15737000	32078000
AT1G17210.1	AT1G17210.1	IAP-like protein 1	0.999107	S	767	30.488	4.48766e-05	88.507	53.062	67.645	27606000	46408000	38024000	71413000	63243000	69277000	49175000	37841000	48504000	44977000	33617000	32781000	67849000	51516000	47475000	61562000	18738000	57108000	21359000	49375000
AT1G17210.1	AT1G17210.1	IAP-like protein 1	0.59793	S	26	5.40104	7.8172e-05	87.85	58.893	87.85	4559800	3818300	0	0	0	5800800	2333500	0	4659700	2804900	0	5171900	5743200	0	0	0	0	0	1045500	3959100
AT1G17210.1	AT1G17210.1	IAP-like protein 1	0.5	S	375	0	0.00543932	56.599	34.125	56.599	0	0	1658500	0	0	0	0	0	0	0	0	0	0	0	2067800	0	0	0	0	0
AT1G17210.1	AT1G17210.1	IAP-like protein 1	0.999913	S	570	40.602	3.67357e-09	131.18	114.12	112.3	7215900	5234400	3551200	6042400	0	8021900	6512000	3136600	6380000	3200500	3558200	7088700	6455600	5588000	0	7377400	1972500	6428200	1164800	4598500
AT1G17210.1	AT1G17210.1	IAP-like protein 1	0.5	T	509	0	1.62551e-06	95.123	74.742	95.123	0	0	11497000	0	0	0	0	0	0	0	0	0	0	0	0	0	0	0	0	0
AT1G17210.1	AT1G17210.1	IAP-like protein 1	0.606789	T	374	1.88411	0.000330856	83.54	68.861	83.54	1508400	965740	1658500	4839200	3987000	924140	0	959840	0	1646500	1680900	2612500	3276900	0	2067800	7477000	418270	0	195000	1565000
AT1G17280.2	AT1G17280.2	ubiquitin-conjugating enzyme 34 ; ubiquitin-conjugating enzyme 34	0.987347	S	178	20.0074	1.15857e-05	92.363	77.357	84.529	5640600	5525400	0	8581200	4183500	6012300	6289600	3833500	5157000	0	4604900	7174100	4988900	0	0	6012900	0	6275300	0	5567900
AT1G17340.1	AT1G17340.1	Phosphoinositide phosphatase family protein	0.5	S	623	0	0.0176528	42.338	29.711	42.338	0	0	429110	633000	0	0	609470	172560	206070	239440	0	546240	473660	402280	267880	1026900	0	433840	81018	0
AT1G17340.1	AT1G17340.1	Phosphoinositide phosphatase family protein	0.5	S	625	0	0.0176528	42.338	29.711	42.338	0	0	429110	633000	0	0	609470	172560	206070	239440	0	546240	473660	402280	267880	1026900	0	433840	81018	0
AT1G17370.1	AT1G17370.1	oligouridylate binding protein 1B	0.999985	S	232	49.6691	0.0101102	53.565	30.108	53.565	0	0	0	0	3924700	0	0	1986100	0	0	0	3290300	4910800	0	0	2987200	0	6446400	0	0
AT1G17370.1	AT1G17370.1	oligouridylate binding protein 1B	0.599369	S	238	3.25956	0.0101102	53.565	30.108	53.565	0	0	0	0	0	0	0	0	0	0	0	0	0	0	0	0	0	6446400	0	0
AT1G17370.1	AT1G17370.1	oligouridylate binding protein 1B	0.999876	S	241	39.0727	2.14119e-77	231.58	158.92	203.27	34012000	22301000	25032000	40974000	30176000	51059000	17698000	16205000	20392000	13753000	14736000	32873000	49871000	38767000	16279000	33275000	7342800	48840000	6612200	25069000
AT1G17455.2	AT1G17455.2	ELF4-like 4 ; ELF4-like 4	0.57103	S	92	7.01999	0.0200175	48.112	26.056	48.112	0	0	0	0	0	0	2552800	0	0	0	0	0	0	0	0	0	0	0	0	0
AT1G17580.1	AT1G17580.1	myosin 1	1	S	1510	48.6398	0.00120327	60.563	32.395	48.64	0	0	158430	1974700	763850	0	224210	103920	402040	148290	0	264120	811840	187730	0	2433400	0	0	0	66834
AT1G17690.1	AT1G17690.1	FUNCTIONS IN: molecular_function unknown; INVOLVED IN: biological_process unknown; LOCATED IN: nucleus; EXPRESSED IN: 24 plant structures; EXPRESSED DURING: 13 growth stages; CONTAINS InterPro DOMAIN/s: Digestive organ expansion factor, predicted (InterPr	0.998472	S	333	29.2711	7.3951e-05	60.348	37.125	50.294	0	0	0	0	4288500	1654200	0	3743100	5292200	0	0	0	0	6572500	316880	0	0	0	0	0
AT1G17720.2	AT1G17720.2	Protein phosphatase 2A, regulatory subunit PR55 ; Protein phosphatase 2A, regulatory subunit PR55	0.95884	S	459	14.2501	1.2421e-11	131.65	114.44	120.63	14791000	9886300	9257300	9087300	9803600	14962000	11354000	6192300	10696000	8868200	5467500	13807000	15786000	12342000	4980900	8482300	3516500	12674000	3899400	7642600
AT1G17745.1	AT1G17745.1	D-3-phosphoglycerate dehydrogenase ; D-3-phosphoglycerate dehydrogenase	0.999989	S	71	49.5538	5.11808e-202	318.41	297.98	302.9	137350000	91151000	125330000	101340000	81348000	111710000	110610000	91927000	106280000	70320000	98638000	116690000	106050000	80124000	93071000	127800000	29396000	89306000	36550000	88785000
AT1G18040.1	AT1G18040.1	cyclin-dependent kinase D1;3	0.802005	S	327	6.07523	1.48666e-10	119.39	70.592	90.793	0	1932100	2721200	5357600	3198400	4467400	2517800	1555300	1997200	1963200	0	3756600	3965100	3750800	2854700	0	678810	0	0	3448900
AT1G18040.1	AT1G18040.1	cyclin-dependent kinase D1;3	0.795371	T	324	5.89602	4.01189e-05	94.191	55.17	90.614	3457300	0	0	0	0	0	0	0	1997200	0	0	3756600	0	0	0	3065000	0	3897400	0	0
AT1G18150.3	AT1G18150.3	Protein kinase superfamily protein ; Protein kinase superfamily protein ; Protein kinase superfamily protein	1	S	539	104.451	2.37656e-181	302.04	280.74	247.02	14562000	17255000	15433000	16807000	11996000	16085000	24813000	10419000	9947400	11961000	7075400	17609000	13576000	12226000	7475600	16703000	2742700	12900000	5682300	7770600
AT1G18150.3	AT1G18150.3	Protein kinase superfamily protein ; Protein kinase superfamily protein ; Protein kinase superfamily protein	1	S	495	60.4363	0.00547594	60.436	34.327	60.436	0	9696400	12713000	12223000	0	0	0	0	0	10570000	0	0	10739000	0	0	13353000	0	10078000	0	9091600
AT1G18150.3;AT1G73670.1	AT1G18150.3	Protein kinase superfamily protein ; Protein kinase superfamily protein ; Protein kinase superfamily protein ; MAP kinase 15	0.995977	Y	268	23.9325	9.76029e-29	180.85	167.11	175.56	797270	2597700	2832300	18606000	8505100	4565400	11393000	999130	1789400	3414600	3137400	8073800	8055900	3490300	1752100	25083000	126110	3843000	395840	2885100
AT1G18150.3;AT1G73670.1	AT1G18150.3	Protein kinase superfamily protein ; Protein kinase superfamily protein ; Protein kinase superfamily protein ; MAP kinase 15	0.99942	T	266	34.3116	9.99739e-28	175.56	159.62	80.975	0	906640	934170	6869100	2730800	1884800	3266300	307670	653880	664980	1169000	2967700	2316500	1493300	1752100	10129000	0	1576300	91218	970010
AT1G18190.1	AT1G18190.1	golgin candidate 2	0.98123	S	43	17.183	3.18506e-16	147.52	129.13	126.09	24006000	17987000	0	29168000	22538000	29017000	21685000	13326000	0	16260000	11501000	26534000	24684000	20945000	18355000	23365000	8341200	23232000	8205000	16711000
AT1G18190.1	AT1G18190.1	golgin candidate 2	0.607557	T	42	1.8981	2.39673e-16	152.16	127.91	152.16	0	0	16421000	0	0	0	0	0	19388000	0	0	0	0	0	0	0	0	0	0	0
AT1G18210.2	AT1G18210.2	Calcium-binding EF-hand family protein ; Calcium-binding EF-hand family protein	0.995384	S	54	23.3763	2.12907e-07	112.82	91.185	112.82	5266100	13400000	6734500	8712400	10048000	9432300	9866200	4131800	6016600	9964900	5799800	13414000	10452000	8353500	5760200	13486000	5604300	10970000	7954600	5816000
AT1G18390.1	AT1G18390.1	Protein kinase superfamily protein ; Protein kinase superfamily protein	0.999847	S	630	39.2519	0.000134056	83.692	62.835	83.692	2676300	1794100	2433800	0	2742900	3104000	1850000	0	0	0	0	3428700	1920500	2502000	2389100	3268000	669960	3456100	749790	2468900
AT1G18390.1	AT1G18390.1	Protein kinase superfamily protein ; Protein kinase superfamily protein	0.831868	S	637	7.16861	0.000178605	78.513	63.826	78.513	0	0	0	0	0	0	0	2029700	3673900	0	2133700	0	0	0	0	0	0	0	0	0
AT1G18420.1	AT1G18420.1	Aluminium activated malate transporter family protein	0.999993	S	45	51.4147	8.94548e-06	93.345	74.251	84.605	0	3715200	0	0	0	1474000	3911900	1463000	1345200	2548500	1161000	1175600	2060300	1720800	1255300	7375000	1111300	1616400	3549100	1496000
AT1G18420.1	AT1G18420.1	Aluminium activated malate transporter family protein	0.345316	S	494	0	0.00162651	48.182	45.458	48.182	0	0	0	0	0	0	0	0	0	0	0	0	0	0	0	0	0	0	0	0
AT1G18420.1	AT1G18420.1	Aluminium activated malate transporter family protein	0.345316	S	495	0	0.00162651	48.182	45.458	48.182	0	0	0	0	0	0	0	0	0	0	0	0	0	0	0	0	0	0	0	0
AT1G18420.1	AT1G18420.1	Aluminium activated malate transporter family protein	0.999991	S	474	50.7887	2.37744e-28	162.31	133.24	141.58	17498000	37437000	15201000	22578000	16104000	17645000	51911000	11830000	19279000	28534000	12561000	23381000	20262000	15519000	14449000	43989000	7838300	20498000	19642000	16919000
AT1G18840.2	AT1G18840.2	IQ-domain 30 ; IQ-domain 30	0.999355	S	75	31.9053	1.69321e-20	109.79	98.934	109.79	0	34347000	0	0	0	56881000	0	0	0	0	0	0	0	0	0	0	1436700	0	0	0
AT1G18950.1	AT1G18950.1	DDT domain superfamily	0.992444	S	12	22.1995	0.000120012	68.552	60.193	68.552	2869300	0	3527800	7632500	5678800	4504200	4418800	2862500	4119000	0	0	4120100	5140400	0	0	4564900	0	7305100	1814300	5965900
AT1G18950.1	AT1G18950.1	DDT domain superfamily	0.968406	S	628	16.0044	8.24035e-08	115.68	92.262	88.09	0	1963700	0	5904000	1216500	0	2859200	1545700	1573700	0	0	2631800	0	2944900	4434000	0	1810400	4553800	761240	3243100
AT1G18950.1	AT1G18950.1	DDT domain superfamily	0.978881	S	630	16.9428	2.33842e-05	88.09	76.444	88.09	0	0	0	5904000	0	0	0	0	0	0	0	0	0	0	4434000	0	0	0	0	0
AT1G18950.1	AT1G18950.1	DDT domain superfamily	1	S	432	45.8792	0.00083024	59.607	42.539	45.879	11452000	0	10851000	16955000	12387000	0	9839500	8422100	12993000	8142700	7342300	15012000	19959000	1235800	0	1110700	0	10475000	0	13197000
AT1G19270.1	AT1G19270.1	DA1	0.997766	S	119	26.5004	0.0011346	62.042	34.275	62.042	0	0	0	0	0	0	0	0	0	4648800	0	0	0	0	0	0	0	0	0	0
AT1G19350.6	AT1G19350.6	Brassinosteroid signalling positive regulator (BZR1) family protein ; Brassinosteroid signalling positive regulator (BZR1) family protein ; Brassinosteroid signalling positive regulator (BZR1) family protein ; Brassinosteroid signalling positive regulator	0.541368	S	272	2.24555	0.00269195	46.66	38.373	46.66	1680700	994940	996430	0	2340600	2779000	2104000	492410	924260	620160	1102400	1876500	1188600	1629800	1033900	5644600	300400	2121500	180860	827270
AT1G19350.6	AT1G19350.6	Brassinosteroid signalling positive regulator (BZR1) family protein ; Brassinosteroid signalling positive regulator (BZR1) family protein ; Brassinosteroid signalling positive regulator (BZR1) family protein ; Brassinosteroid signalling positive regulator	0.564119	S	171	1.166	0.00768362	58.123	41.492	47.082	5733100	3952200	0	6915200	3798400	3856300	3683100	0	3675700	3454200	4166400	6385300	0	2944500	1171700	3900100	0	5221400	0	0
AT1G19350.6	AT1G19350.6	Brassinosteroid signalling positive regulator (BZR1) family protein ; Brassinosteroid signalling positive regulator (BZR1) family protein ; Brassinosteroid signalling positive regulator (BZR1) family protein ; Brassinosteroid signalling positive regulator	0.443856	S	179	0.713278	0.00768362	58.123	41.492	58.123	0	0	0	0	0	0	0	0	0	0	0	0	0	0	0	0	0	0	0	0
AT1G19350.6	AT1G19350.6	Brassinosteroid signalling positive regulator (BZR1) family protein ; Brassinosteroid signalling positive regulator (BZR1) family protein ; Brassinosteroid signalling positive regulator (BZR1) family protein ; Brassinosteroid signalling positive regulator	0.357849	S	180	0	0.0143218	42.708	24.083	42.708	0	0	0	0	0	0	0	0	0	0	0	0	0	0	0	0	0	0	0	0
AT1G19370.1	AT1G19370.1	unknown protein; LOCATED IN: endoplasmic reticulum; EXPRESSED IN: 22 plant structures; EXPRESSED DURING: 13 growth stages; BEST Arabidopsis thaliana protein match is: unknown protein (TAIR:AT1G75140.1); Has 45 Blast hits to 43 proteins in 15 species: Arch	0.612803	T	511	4.71059	0.0103338	43.534	28.848	43.534	0	0	0	0	0	0	708540	0	433180	416770	0	0	0	0	0	2176000	0	0	135400	481930
AT1G19450.1	AT1G19450.1	Major facilitator superfamily protein	0.999984	S	2	48.078	4.60496e-06	113.4	75.02	92.925	50287000	35884000	31324000	37247000	27078000	43388000	0	29154000	43484000	30321000	0	57475000	53606000	26756000	869970	66631000	14029000	31836000	18486000	31537000
AT1G19450.1	AT1G19450.1	Major facilitator superfamily protein	0.970441	T	8	15.1628	1.38216e-08	138.19	93.07	138.19	0	38624000	0	54575000	0	33605000	50965000	0	0	0	0	0	0	0	32903000	0	0	0	0	0
AT1G19660.2	AT1G19660.2	Wound-responsive family protein ; Wound-responsive family protein	0.900286	Y	250	9.99251	0.0420817	42.336	23.093	42.001	0	0	0	3146700	3410000	7089300	9221400	0	0	0	0	2920600	0	4617200	3435300	0	6173400	1577900	7271000	4689300
AT1G19870.1	AT1G19870.1	IQ-domain 32	0.831122	S	580	9.52769	0.000707658	66.989	41.515	44.426	9275200	3654600	4340300	8664800	3224700	6937200	0	0	0	0	3729200	6622600	9596500	8624400	4165900	4415600	0	7515100	2664300	8408100
AT1G19870.1	AT1G19870.1	IQ-domain 32	0.999797	S	502	37.3349	9.41654e-43	191.22	171.16	132.97	7283800	6986900	10624000	19673000	11657000	14907000	7735300	0	9889300	6615200	6150800	0	0	7681100	8689500	12764000	5266600	14333000	3594700	11562000
AT1G19870.1	AT1G19870.1	IQ-domain 32	0.583484	S	610	1.57493	4.45316e-09	123.2	95.878	123.2	0	0	0	17538000	0	0	0	0	0	0	0	0	0	0	0	0	0	0	0	0
AT1G19870.1	AT1G19870.1	IQ-domain 32	1	S	78	67.192	7.0143e-95	242.48	220.78	144.92	25086000	23840000	13187000	54578000	27240000	51902000	22369000	9486500	21672000	15644000	10103000	34128000	26856000	17235000	32061000	57846000	7673300	45427000	6953100	37057000
AT1G19870.1	AT1G19870.1	IQ-domain 32	1	S	80	75.9825	7.0143e-95	242.48	220.78	144.92	19491000	20924000	10543000	48339000	22498000	48622000	17030000	9486500	19267000	11480000	7518800	34128000	26856000	17235000	28559000	54593000	4775100	42238000	4808900	31707000
AT1G19870.1	AT1G19870.1	IQ-domain 32	0.860005	S	479	8.53941	1.84616e-14	140.1	70.526	125.61	18617000	0	253750000	5694700	0	386780000	0	9812600	0	11047000	10580000	18593000	0	17709000	304630000	0	110140000	0	116660000	288650000
AT1G19870.1	AT1G19870.1	IQ-domain 32	0.810776	S	59	7.29461	0.000262987	71.98	51.203	63.894	0	1400600	0	4118000	2254200	0	0	837320	1594600	500570	1242100	2711100	1976300	1408400	0	0	471430	1725200	0	1445000
AT1G19870.1	AT1G19870.1	IQ-domain 32	0.730663	S	65	9.11409	0.0230111	40.941	28.796	40.941	0	0	896920	2371700	1174200	1257100	1174400	567870	749520	1267800	492840	0	1445100	0	0	2157900	0	0	0	0
AT1G19870.1	AT1G19870.1	IQ-domain 32	0.997238	S	180	25.6008	4.05829e-38	190.86	159.18	157.68	19605000	12195000	15555000	18356000	15203000	29628000	15803000	10620000	19619000	8212200	6568300	23547000	25689000	21482000	9294700	18118000	6195300	24402000	4226300	16845000
AT1G19870.1	AT1G19870.1	IQ-domain 32	0.999993	S	369	54.1646	7.00741e-05	90.581	63.795	90.581	0	0	3222700	3697100	0	13056000	0	2835700	4157100	2053100	1551400	0	9135900	5296200	0	0	1028800	4208600	0	0
AT1G19870.1	AT1G19870.1	IQ-domain 32	0.653334	S	679	5.76268	1.26507e-05	94.707	79.447	94.707	0	8780600	0	13462000	7906600	0	12398000	0	0	0	3801700	3758600	0	0	14925000	0	4694600	0	0	7646500
AT1G19870.1	AT1G19870.1	IQ-domain 32	0.644951	S	680	5.62653	1.76912e-05	88.755	70.459	57.688	0	0	0	0	0	0	0	0	0	0	0	0	0	0	0	0	0	0	6212900	0
AT1G19870.1	AT1G19870.1	IQ-domain 32	1	S	459	72.8657	3.21059e-50	202.96	160.54	201.57	65092000	45295000	26622000	39526000	34110000	46507000	29164000	26203000	41741000	30945000	19040000	56052000	54741000	44736000	25419000	57904000	15476000	36024000	14835000	48499000
AT1G19870.1	AT1G19870.1	IQ-domain 32	0.990818	S	706	20.3638	2.17677e-22	148.41	121	82.651	112620000	76502000	55171000	125600000	108310000	111470000	77764000	43198000	90279000	65730000	41659000	106900000	112930000	66594000	52546000	71602000	29555000	61615000	39514000	54854000
AT1G19870.1	AT1G19870.1	IQ-domain 32	0.99999	S	130	50.0989	3.94756e-05	77.527	58.469	77.527	0	779750	1700400	3073100	1780100	2519600	1215500	1085000	1429300	1267200	848590	1818100	2132200	1377700	1803300	1196200	415860	1958900	309160	789760
AT1G19870.1	AT1G19870.1	IQ-domain 32	0.999999	S	142	64.884	2.13146e-10	114.72	94.021	108.56	11439000	10427000	11536000	16156000	9886800	16165000	9214700	6686200	11777000	9469600	7039400	13019000	14174000	11268000	9684200	12666000	5190800	15653000	5409100	11699000
AT1G19870.1	AT1G19870.1	IQ-domain 32	0.847356	S	405	7.44385	5.29581e-08	119.87	95.014	119.87	10298000	5213800	5424600	12886000	8230000	9465100	6443700	3997600	6198200	4479800	5330600	6519700	9808800	6567000	5994400	7135800	1907500	7590800	2242700	5185700
AT1G19870.1	AT1G19870.1	IQ-domain 32	0.998158	S	193	27.3394	5.04894e-37	187.16	160.45	167.61	89354000	54234000	76830000	72638000	60127000	114260000	68425000	49351000	71564000	46020000	38259000	87688000	88779000	69631000	42609000	79969000	23561000	74106000	22681000	68147000
AT1G19870.1	AT1G19870.1	IQ-domain 32	0.999995	S	742	50.109	6.37254e-09	133.84	110.55	119.38	32053000	12605000	18462000	38475000	30351000	36933000	20935000	15213000	30859000	16796000	7526000	27364000	40608000	24891000	19597000	18004000	6667400	31018000	8632400	25969000
AT1G19870.1	AT1G19870.1	IQ-domain 32	0.816266	S	745	6.45483	6.37254e-09	133.84	110.55	67.979	32053000	12605000	18462000	38475000	30351000	36933000	14904000	15213000	30859000	16796000	7526000	27364000	40608000	24891000	19597000	18004000	6667400	31018000	8632400	25969000
AT1G19870.1	AT1G19870.1	IQ-domain 32	0.805933	S	746	6.05542	4.00391e-06	118.22	99.164	84.327	0	12605000	18462000	0	30351000	36933000	20935000	15213000	0	16796000	0	14808000	40608000	0	19597000	18004000	0	0	0	0
AT1G19870.1	AT1G19870.1	IQ-domain 32	0.834224	T	611	7.40226	4.31749e-16	151.84	136.07	130.6	6876500	0	11147000	0	0	24726000	7683800	0	9472800	0	0	19440000	25805000	11488000	0	18890000	0	21774000	0	9596300
AT1G19870.1	AT1G19870.1	IQ-domain 32	0.602667	T	477	2.33978	4.0679e-18	151.66	91.362	151.66	0	0	0	0	0	0	0	0	0	0	0	0	18074000	0	0	0	0	0	0	0
AT1G19870.1	AT1G19870.1	IQ-domain 32	0.494187	T	61	1.28231	0.00120186	60.255	45.565	40.278	0	0	0	0	0	0	0	0	0	0	0	0	0	0	0	0	0	0	0	0
AT1G19870.1	AT1G19870.1	IQ-domain 32	0.387211	T	62	0	0.00120186	60.255	45.565	60.255	0	0	0	0	0	0	0	0	0	0	0	0	0	0	0	0	0	0	0	0
AT1G19870.1	AT1G19870.1	IQ-domain 32	0.980939	T	151	17.115	4.98411e-208	318.69	287.71	318.69	13056000	12713000	16681000	0	14310000	19191000	9158400	6355600	17775000	0	0	0	9224700	19637000	8081500	0	7707900	22075000	5181900	17400000
AT1G19870.1	AT1G19870.1	IQ-domain 32	0.953022	T	153	13.0724	8.5016e-293	352.05	321.52	91.655	2389900	0	3161500	7199200	1275100	3321600	1944000	1101800	4258800	3574200	2781300	5346200	3513900	4459600	543230	26409000	0	7456900	1643900	7206900
AT1G19870.1	AT1G19870.1	IQ-domain 32	0.499422	T	705	0	0.00496994	55.567	32.01	45.137	0	0	0	0	0	0	0	0	0	0	0	0	0	0	0	0	0	0	0	0
AT1G19880.1	AT1G19880.1	Regulator of chromosome condensation (RCC1) family protein	0.999971	S	430	45.3251	0.000693657	64.64	34.833	64.64	0	2156400	3933400	5405700	4917000	7711500	4827400	2718500	3779200	0	0	0	0	5485000	0	5133600	1395700	7600400	1722700	4182100
AT1G19990.1	AT1G19990.1	unknown protein; FUNCTIONS IN: molecular_function unknown; INVOLVED IN: biological_process unknown; LOCATED IN: cellular_component unknown; EXPRESSED IN: cultured cell; BEST Arabidopsis thaliana protein match is: unknown protein (TAIR:AT5G11600.1); Has 11	1	S	230	118.386	3.40808e-46	159.46	143.71	131.56	0	0	0	0	0	0	0	0	0	0	0	0	0	0	0	0	0	0	0	0
AT1G19990.1	AT1G19990.1	unknown protein; FUNCTIONS IN: molecular_function unknown; INVOLVED IN: biological_process unknown; LOCATED IN: cellular_component unknown; EXPRESSED IN: cultured cell; BEST Arabidopsis thaliana protein match is: unknown protein (TAIR:AT5G11600.1); Has 11	0.999994	S	235	51.9969	3.40808e-46	159.46	143.71	159.34	0	0	0	0	0	0	0	0	0	0	0	0	0	0	0	0	0	0	0	0
AT1G20110.1	AT1G20110.1	RING/FYVE/PHD zinc finger superfamily protein	0.999931	S	533	41.6383	3.15165e-07	97.69	64.494	80.312	0	0	0	0	12367000	0	0	4294400	0	0	0	0	0	1109900	0	0	0	1132000	4582600	7542900
AT1G20110.1	AT1G20110.1	RING/FYVE/PHD zinc finger superfamily protein	0.614695	S	229	2.73691	8.974e-09	104.53	88.125	100.08	0	0	0	0	0	0	0	0	0	0	0	0	8187600	6208800	0	0	0	0	0	0
AT1G20110.1	AT1G20110.1	RING/FYVE/PHD zinc finger superfamily protein	0.694614	S	231	4.28077	2.6314e-07	96.707	88.774	96.707	0	10310000	5671400	0	11392000	0	0	0	0	6884800	3644400	0	0	0	0	0	0	0	0	0
AT1G20110.1	AT1G20110.1	RING/FYVE/PHD zinc finger superfamily protein	0.74592	S	216	4.67734	1.02318e-17	150.05	125.54	97.45	0	52507000	0	84786000	0	0	67003000	38093000	0	68360000	0	0	0	0	36083000	61146000	0	0	0	0
AT1G20110.1	AT1G20110.1	RING/FYVE/PHD zinc finger superfamily protein	0.992829	S	218	21.4151	2.63152e-17	142.54	105.11	142.54	70887000	0	38379000	0	63481000	63982000	0	0	59510000	0	58515000	82105000	83283000	70340000	0	0	22027000	61106000	33849000	47993000
AT1G20200.1	AT1G20200.1	PAM domain (PCI/PINT associated module) protein	0.999998	S	14	57.1645	4.58494e-95	245.78	183	238.8	8105400	6733700	23329000	54100000	24836000	50527000	37747000	5041900	30616000	27684000	5355500	36234000	44518000	35670000	32417000	32046000	10894000	34884000	2999500	24755000
AT1G20200.1	AT1G20200.1	PAM domain (PCI/PINT associated module) protein	0.94764	S	16	14.4754	1.15865e-08	113.31	100.27	66.246	7379100	31463000	5261400	53753000	35268000	20022000	10573000	15012000	7128500	12458000	4705200	11861000	0	10893000	24958000	42336000	2283200	0	2344800	12806000
AT1G20200.1	AT1G20200.1	PAM domain (PCI/PINT associated module) protein	0.833374	S	19	8.42119	1.44721e-07	110.6	97.029	105.32	0	0	0	0	8947500	0	0	0	0	0	0	7826900	9487100	0	7987300	0	0	7938900	0	0
AT1G20200.1	AT1G20200.1	PAM domain (PCI/PINT associated module) protein	0.397218	S	20	0	0.00117176	65.184	50.255	57.578	0	0	0	0	0	0	0	0	0	0	0	0	0	0	0	0	0	0	0	0
AT1G20200.1	AT1G20200.1	PAM domain (PCI/PINT associated module) protein	0.989546	T	12	19.7619	1.2639e-94	238.8	158.99	223.65	36106000	34962000	0	0	0	0	10573000	14861000	0	12458000	21870000	0	0	10893000	6418400	17528000	0	0	0	0
AT1G20220.1	AT1G20220.1	Alba DNA/RNA-binding protein	1	S	147	171.628	0	372.91	351.17	303.45	251860000	151930000	235290000	394400000	240870000	431390000	151040000	174440000	205980000	90208000	142730000	289790000	379320000	258100000	132130000	299420000	73869000	365020000	39553000	216750000
AT1G20220.1	AT1G20220.1	Alba DNA/RNA-binding protein	1	T	14	65.5625	3.33862e-05	93.011	76.478	65.563	12880000	11138000	11675000	19844000	12306000	16862000	10152000	9205300	12592000	11035000	12191000	16721000	16436000	11277000	9555900	14887000	5312000	16149000	5677900	12302000
AT1G20370.1	AT1G20370.1	Pseudouridine synthase family protein	1	S	510	66.0119	0.000283465	66.012	47.24	66.012	4751500	2548300	2638700	5169500	5440300	5559900	3564700	2477000	0	3228300	2840200	4224500	3205300	3412500	0	2334900	0	3046400	1011600	1994100
AT1G20370.1	AT1G20370.1	Pseudouridine synthase family protein	0.998631	S	532	30.7554	9.04119e-13	145.86	128.05	145.86	16312000	7400800	7404300	12140000	0	13416000	14189000	0	0	5551100	4879800	20195000	15308000	12178000	9599000	10219000	2482700	16517000	2239100	6159400
AT1G20370.1	AT1G20370.1	Pseudouridine synthase family protein	0.63213	T	531	2.44322	0.000126486	85.28	66.535	85.28	0	0	0	0	11052000	0	0	0	0	0	0	0	0	0	0	0	0	0	0	0
AT1G20440.1	AT1G20440.1	cold-regulated 47	1	S	64	57.9891	1.37301e-92	241.79	210.7	57.989	49430000	64505000	47161000	74527000	61013000	42216000	51369000	39145000	41840000	39082000	38161000	57175000	56574000	40037000	35063000	54417000	9597400	37192000	26973000	37361000
AT1G20440.1	AT1G20440.1	cold-regulated 47	0.999358	S	22	33.089	1.44307e-48	191.99	171.56	156.4	18150000	26487000	20548000	33721000	22270000	18081000	35996000	14377000	17292000	26327000	18341000	17294000	16041000	15780000	17744000	26774000	3808400	19450000	12914000	15719000
AT1G20440.1	AT1G20440.1	cold-regulated 47	0.999615	T	90	34.1389	5.92961e-09	112.34	86.853	98.84	0	3724900	1713700	8720200	8810700	8576600	16474000	4681100	6917200	8591300	0	8728200	11362000	8221500	4650300	8417500	1007700	5451800	922320	0
AT1G20440.1	AT1G20440.1	cold-regulated 47	0.811717	T	14	6.35647	2.44855e-39	180.26	165.78	128.89	17358000	28240000	12515000	0	0	0	32778000	0	0	23089000	0	21378000	0	0	0	0	4824300	0	17542000	0
AT1G20440.1	AT1G20440.1	cold-regulated 47	0.836759	T	16	8.12407	4.74732e-18	132.33	120.71	107.83	0	0	0	20597000	0	16890000	0	13433000	0	0	10270000	0	15097000	0	12686000	30740000	0	13923000	0	16950000
AT1G20450.2	AT1G20450.2	Dehydrin family protein ; Dehydrin family protein	0.99877	S	61	29.897	0.000258707	70.622	43.995	70.622	4978400	3557600	3701400	8386400	5140800	6866800	6424200	3190500	5267900	4454700	0	4998400	3662100	4401200	4411500	5974800	2038100	6485000	2607300	3384700
AT1G20450.2	AT1G20450.2	Dehydrin family protein ; Dehydrin family protein	0.496982	T	218	0	0.00189983	45.957	39.082	45.957	0	0	0	0	0	0	0	0	0	0	0	0	0	0	0	0	0	0	0	0
AT1G20450.2	AT1G20450.2	Dehydrin family protein ; Dehydrin family protein	0.997874	T	220	26.7153	6.76421e-21	138.84	127.74	122.68	16129000	8676600	10731000	17345000	13513000	13129000	20085000	9757900	18070000	10011000	11189000	15208000	16594000	14867000	10468000	20814000	0	15932000	0	10791000
AT1G20450.2	AT1G20450.2	Dehydrin family protein ; Dehydrin family protein	1	T	14	68.0738	4.2868e-05	85.813	80.654	85.813	9237300	6170700	9936800	3356500	0	6919600	11609000	9875900	8128300	5037600	5877300	0	5572700	6750800	0	12743000	3928800	8606400	5908200	0
AT1G20670.1	AT1G20670.1	DNA-binding bromodomain-containing protein	0.999753	S	164	36.4253	1.20955e-07	105.06	83.515	105.06	5476100	2733900	3094500	8159600	5275400	3555400	3892500	2478500	3389300	3477300	0	0	8111700	2833400	2939900	4440700	948970	5187200	941540	2959800
AT1G20670.1	AT1G20670.1	DNA-binding bromodomain-containing protein	1	S	279	78.8174	1.22894e-38	177.14	163.88	163.39	21860000	21192000	17781000	24963000	20454000	24663000	15830000	11117000	15050000	17830000	13483000	21181000	26449000	20784000	12578000	21418000	5186700	20000000	6024800	15437000
AT1G20670.1	AT1G20670.1	DNA-binding bromodomain-containing protein	0.997572	S	514	26.2193	1.03682e-05	112.5	92.038	83.633	1203800	410140	1009400	2884300	2614100	1235100	1552900	527700	0	0	1029500	909260	0	0	1310300	5431500	600140	0	366860	0
AT1G20670.1	AT1G20670.1	DNA-binding bromodomain-containing protein	0.685052	S	320	6.06429	0.00387511	54.281	37.255	54.281	2722500	2757500	0	6848700	3010800	3363800	0	1901300	0	2986600	0	0	3639800	0	0	3521000	1100500	2446900	1113200	0
AT1G20696.1	AT1G20696.1	high mobility group B3 ; high mobility group B2 ; high mobility group B3 ; high mobility group B2 ; high mobility group B2	1	S	117	45.0136	0.0224843	45.014	25.69	45.014	4228700	2539900	3081600	3164900	2141300	4591500	2215800	2287800	3499100	0	1723800	3671600	4372500	4482600	2449700	3982400	265040	4474100	0	0
AT1G20696.1	AT1G20696.1	high mobility group B3 ; high mobility group B2	1	S	134	75.4876	4.35991e-15	107.99	101.09	107.99	0	0	0	0	0	0	0	0	0	0	0	0	0	0	0	0	0	0	0	0
AT1G20760.1	AT1G20760.1	Calcium-binding EF hand family protein	0.750728	S	988	7.6377	0.000155772	66.36	60.519	66.36	479560	700410	555040	1736200	941110	0	934390	390630	641140	441930	664040	1070000	649360	645980	421790	3836900	138160	1237000	101040	710430
AT1G20760.1	AT1G20760.1	Calcium-binding EF hand family protein	0.362546	S	894	0	0.000213131	57.351	51.256	56.533	0	0	0	0	0	0	0	0	0	0	0	0	0	0	0	0	0	0	0	0
AT1G20760.1	AT1G20760.1	Calcium-binding EF hand family protein	0.362546	S	896	0	0.000213131	57.351	51.256	56.533	0	0	0	0	0	0	0	0	0	0	0	0	0	0	0	0	0	0	0	0
AT1G20760.1	AT1G20760.1	Calcium-binding EF hand family protein	1	S	900	77.8624	9.68886e-112	256.84	228.53	253.26	17895000	14752000	10520000	11503000	14642000	26737000	10687000	7564500	16507000	13647000	7132700	13972000	20636000	12576000	7222700	13333000	3835900	10292000	6056600	9046200
AT1G20760.1	AT1G20760.1	Calcium-binding EF hand family protein	0.994116	S	939	25.2879	0.00262946	51.445	40.376	46.158	25120000	18418000	17616000	17014000	0	25899000	16658000	15760000	21549000	0	0	0	18363000	24782000	0	0	10936000	0	0	16720000
AT1G20760.1	AT1G20760.1	Calcium-binding EF hand family protein	0.999838	S	878	37.8805	0.0127081	47.568	26.034	47.568	0	6933900	0	0	5906700	0	5896300	0	5426500	4538400	0	0	0	0	0	644620	1842800	0	0	0
AT1G20760.1	AT1G20760.1	Calcium-binding EF hand family protein	0.99768	S	883	26.3346	0.0127081	47.568	26.034	47.568	0	6933900	0	0	5906700	0	5896300	0	5426500	4538400	0	0	0	0	0	644620	1842800	0	0	0
AT1G20760.1	AT1G20760.1	Calcium-binding EF hand family protein	0.866432	S	957	8.10268	0.00489018	54.951	32.796	45.115	3820700	5188000	3606400	0	7146700	0	3419200	0	3383400	2588000	3531500	4841800	4768000	5549600	7222300	5417600	0	3328700	0	2999900
AT1G20760.1	AT1G20760.1	Calcium-binding EF hand family protein	0.957875	S	960	13.5197	0.00489018	54.951	32.796	45.115	3820700	5188000	3606400	0	7146700	0	3419200	0	3383400	2588000	3531500	4841800	4768000	5549600	7222300	5417600	0	3328700	0	2999900
AT1G20760.1	AT1G20760.1	Calcium-binding EF hand family protein	0.223516	S	762	0	0.00107806	59.512	36.34	59.512	0	0	0	0	0	0	0	0	0	0	0	0	0	0	0	0	0	0	0	0
AT1G20760.1	AT1G20760.1	Calcium-binding EF hand family protein	0.643231	S	769	3.20718	6.20962e-20	164.02	143.77	71.073	0	18207000	24838000	65406000	0	28664000	19060000	19041000	69282000	0	11057000	0	38317000	24220000	0	0	0	0	0	13431000
AT1G20760.1	AT1G20760.1	Calcium-binding EF hand family protein	0.999847	S	773	38.158	4.78819e-20	165.06	151.21	145.88	13294000	23056000	0	10688000	9822200	33853000	11096000	10195000	14116000	16954000	4699300	35460000	36783000	9772800	0	0	0	4984800	0	0
AT1G20760.1	AT1G20760.1	Calcium-binding EF hand family protein	0.993581	S	777	22.7394	8.50946e-06	89.145	68.294	80.721	36689000	32829000	36591000	45555000	25242000	47625000	24121000	26729000	40409000	17945000	11057000	55861000	31722000	25675000	0	0	0	0	0	0
AT1G20760.1	AT1G20760.1	Calcium-binding EF hand family protein	0.635281	S	918	2.41015	0.00233398	64.55	21.762	64.55	0	0	0	0	0	0	0	0	0	7811800	7987700	0	0	0	0	0	0	0	0	0
AT1G20760.1	AT1G20760.1	Calcium-binding EF hand family protein	0.98128	S	922	17.3841	0.000235333	81.565	29.567	61.375	5388800	15682000	10407000	27727000	11162000	20329000	9587500	6190700	11255000	0	7132400	17485000	14135000	15825000	19409000	3898100	2554700	17594000	3629300	10653000
AT1G20760.1	AT1G20760.1	Calcium-binding EF hand family protein	0.99155	S	925	20.7788	0.000491491	70.26	31.884	65.219	0	7631600	2914400	13010000	0	10900000	0	1886600	7697100	0	7132400	8129200	7952600	6585000	10172000	0	0	6820700	0	6612200
AT1G20760.1	AT1G20760.1	Calcium-binding EF hand family protein	0.999843	S	788	38.0452	3.19587e-77	228.8	201.83	186.56	65411000	51099000	47423000	76880000	60719000	67336000	70437000	32768000	57448000	43562000	36782000	70037000	63034000	52441000	39701000	55691000	17659000	59443000	23321000	45382000
AT1G20760.1	AT1G20760.1	Calcium-binding EF hand family protein	1	S	826	121.564	5.2694e-62	211.89	197.63	183.22	12064000	5790300	7001800	5226400	5681700	14725000	6437200	5696100	6932900	3761400	4323700	10580000	12782000	7727200	3613800	8889500	2170200	8822000	2099000	6232100
AT1G20760.1	AT1G20760.1	Calcium-binding EF hand family protein	0.999995	S	866	52.2388	2.35643e-12	143.83	125.41	143.83	7928900	5981000	6885100	10119000	9153400	10380000	7213400	505820	0	5995400	0	9245600	8694000	7859900	7847100	7367600	0	7403800	0	280490
AT1G20760.1	AT1G20760.1	Calcium-binding EF hand family protein	0.674307	S	869	3.21663	1.5412e-49	209.31	178.83	125.52	7928900	5981000	0	10119000	0	0	14515000	0	0	10830000	0	9245600	0	7859900	13987000	7367600	0	7403800	0	0
AT1G20760.1	AT1G20760.1	Calcium-binding EF hand family protein	0.44107	T	903	0	1.67463e-05	69.444	62.971	57.845	0	0	0	0	0	0	0	0	0	0	0	0	0	0	0	0	0	0	0	0
AT1G20760.1	AT1G20760.1	Calcium-binding EF hand family protein	0.223516	T	766	0	0.00107806	59.512	36.34	59.512	0	0	0	0	0	0	0	0	0	0	0	0	0	0	0	0	0	0	0	0
AT1G20760.1	AT1G20760.1	Calcium-binding EF hand family protein	0.223516	T	767	0	0.00107806	59.512	36.34	59.512	0	0	0	0	0	0	0	0	0	0	0	0	0	0	0	0	0	0	0	0
AT1G20760.1	AT1G20760.1	Calcium-binding EF hand family protein	0.834017	T	870	7.69634	2.12506e-92	243.86	212.86	211.29	9753700	0	14431000	16117000	16852000	17294000	0	6801500	10529000	0	7425800	9828400	8694000	8889100	0	8635200	0	10109000	0	8104400
AT1G20770.1	AT1G20770.1	unknown protein; Has 59 Blast hits to 59 proteins in 24 species: Archae - 0; Bacteria - 0; Metazoa - 26; Fungi - 4; Plants - 29; Viruses - 0; Other Eukaryotes - 0 (source: NCBI BLink).	0.993121	S	132	21.6125	2.32069e-06	109.04	93.649	109.04	0	2551700	2703400	3938200	5047100	4539000	4577200	3188600	2871600	3252500	2214900	4449200	4276900	0	2416000	3504500	874660	4189700	907310	1462400
AT1G20770.1	AT1G20770.1	unknown protein; Has 59 Blast hits to 59 proteins in 24 species: Archae - 0; Bacteria - 0; Metazoa - 26; Fungi - 4; Plants - 29; Viruses - 0; Other Eukaryotes - 0 (source: NCBI BLink).	0.999912	S	135	40.5314	4.21647e-177	301.82	264.02	205.06	15573000	11307000	9511100	24966000	22164000	12934000	17446000	8062500	10712000	11516000	6759700	12412000	10386000	11321000	10623000	16911000	3972600	18735000	4257600	14197000
AT1G20840.1	AT1G20840.1	tonoplast monosaccharide transporter1	0.570144	Y	267	1.36258	0.000611798	55.413	39.49	55.413	0	10664000	0	0	0	0	0	0	0	0	0	0	0	0	0	0	0	0	0	0
AT1G20840.1	AT1G20840.1	tonoplast monosaccharide transporter1	0.459785	S	396	0	4.05087e-05	101.05	85.289	90.754	0	0	0	0	0	0	0	0	0	0	0	0	0	0	0	0	0	0	0	0
AT1G20840.1	AT1G20840.1	tonoplast monosaccharide transporter1	0.61957	S	398	3.6072	4.05087e-05	101.05	85.289	61.127	0	0	0	0	0	0	0	0	0	0	0	0	20422000	0	9206100	0	0	0	0	0
AT1G20840.1	AT1G20840.1	tonoplast monosaccharide transporter1	0.998616	S	401	29.8323	1.9118e-09	138.05	126.28	92.307	23629000	37019000	29558000	39789000	16042000	38973000	45804000	10954000	28380000	25725000	0	44394000	47805000	30086000	27336000	50341000	0	38409000	10902000	7825400
AT1G20840.1	AT1G20840.1	tonoplast monosaccharide transporter1	1	S	305	53.001	5.8136e-51	208.47	176.87	53.001	6479800	5990000	5496500	26900000	14528000	7839600	17252000	2586100	3024800	8437200	8671300	13192000	9059600	7923700	7298500	59763000	1724500	0	1077500	4156300
AT1G20840.1	AT1G20840.1	tonoplast monosaccharide transporter1	1	S	287	73.0223	7.0112e-19	153.94	110.04	73.022	6092000	8663200	6154000	13095000	7904500	8296700	15080000	6698100	7991000	9700000	5877200	12061000	12853000	9204800	10305000	25938000	0	11738000	5891200	7196400
AT1G20840.1	AT1G20840.1	tonoplast monosaccharide transporter1	1	S	292	73.0223	3.05693e-13	127.66	102.02	73.022	17864000	22678000	19220000	28382000	12473000	26942000	18656000	13077000	14277000	18800000	12726000	22410000	21314000	21647000	19630000	32408000	7133300	21334000	8838200	17896000
AT1G20840.1	AT1G20840.1	tonoplast monosaccharide transporter1	1	S	266	71.0614	3.48972e-21	157.35	134.26	157.35	8158500	9200800	10557000	32107000	19777000	23314000	18564000	9152100	10036000	7607800	4154900	29293000	29403000	15857000	9600300	23709000	4280900	16886000	4251000	20506000
AT1G20840.1	AT1G20840.1	tonoplast monosaccharide transporter1	0.963498	S	277	14.2154	4.75852e-24	157.03	125.55	154.36	11879000	26993000	18191000	74037000	43403000	24723000	40649000	13450000	7590100	31867000	25226000	45677000	34226000	30180000	41282000	27338000	5142300	30102000	5224400	27034000
AT1G20840.1	AT1G20840.1	tonoplast monosaccharide transporter1	0.539545	S	278	0.729253	1.16192e-08	102.46	90.03	55.413	0	10664000	0	0	0	0	0	0	0	0	0	0	0	8328500	0	0	0	0	0	0
AT1G20840.1	AT1G20840.1	tonoplast monosaccharide transporter1	0.999999	S	319	61.8536	5.37585e-17	153.59	137.25	153.59	18902000	10129000	10532000	74688000	46968000	43712000	65271000	27869000	29550000	34255000	32302000	61204000	60106000	47015000	17562000	49744000	2202900	39515000	2200700	19263000
AT1G20840.1	AT1G20840.1	tonoplast monosaccharide transporter1	1	S	480	45.7899	1.38782e-07	109.48	95.514	45.79	21884000	16420000	18907000	29538000	13058000	24524000	27714000	13811000	19214000	15523000	5542100	30651000	30262000	23870000	23917000	22180000	3700200	24108000	4809400	16773000
AT1G20840.1	AT1G20840.1	tonoplast monosaccharide transporter1	1	S	484	45.7899	1.38782e-07	109.48	95.514	45.79	13974000	12638000	15591000	23578000	11929000	16381000	23977000	9179200	13396000	12299000	3908500	19955000	19807000	19857000	17798000	16291000	2096600	14847000	7542500	12982000
AT1G20840.1	AT1G20840.1	tonoplast monosaccharide transporter1	0.682962	T	395	6.19804	4.05087e-05	101.05	85.289	56.851	0	0	0	0	0	0	11026000	0	0	0	0	0	0	24252000	0	0	0	22915000	0	0
AT1G20840.1	AT1G20840.1	tonoplast monosaccharide transporter1	0.475435	T	399	0.671222	0.000920056	59.513	43.02	58.83	0	0	0	0	0	0	0	0	0	0	0	0	0	0	0	0	0	0	0	0
AT1G20840.1	AT1G20840.1	tonoplast monosaccharide transporter1	0.480867	T	261	0	0.0010865	48.422	37.906	48.422	0	0	0	0	0	0	0	0	0	0	0	0	0	0	0	0	0	0	0	0
AT1G20920.1	AT1G20920.1	P-loop containing nucleoside triphosphate hydrolases superfamily protein	1	S	210	51.7258	2.63209e-06	111.43	76.427	51.726	8122600	4785500	8888500	16230000	10255000	11166000	10106000	5838600	7454800	6395200	6843400	12452000	10506000	8682900	7559200	6258800	2058500	12012000	3146200	5362400
AT1G20920.1	AT1G20920.1	P-loop containing nucleoside triphosphate hydrolases superfamily protein ; P-loop containing nucleoside triphosphate hydrolases superfamily protein ; P-loop containing nucleoside triphosphate hydrolases superfamily protein	0.494458	S	444	1.93215	0.00628992	57.267	40.961	57.267	4435800	2160600	0	0	3854700	0	3039200	0	0	0	0	4719700	0	0	0	0	0	0	0	0
AT1G20920.1	AT1G20920.1	P-loop containing nucleoside triphosphate hydrolases superfamily protein ; P-loop containing nucleoside triphosphate hydrolases superfamily protein ; P-loop containing nucleoside triphosphate hydrolases superfamily protein	0.439236	S	447	3.58746	0.00899024	51.939	36.839	51.939	0	0	0	0	0	0	0	0	0	0	0	0	0	0	0	0	0	0	0	0
AT1G20960.2	AT1G20960.2	U5 small nuclear ribonucleoprotein helicase, putative ; U5 small nuclear ribonucleoprotein helicase, putative	0.917319	S	100	12.8092	0.00324204	58.427	45.006	58.427	4457000	3140900	4165800	6396800	3765100	5894700	3090400	3285900	2916600	3054600	0	3751300	3179200	3190600	3472600	0	961010	3205600	1233800	3563900
AT1G20970.1	AT1G20970.1	FUNCTIONS IN: molecular_function unknown; INVOLVED IN: biological_process unknown; LOCATED IN: plasma membrane, vacuole; EXPRESSED IN: guard cell, cultured cell; BEST Arabidopsis thaliana protein match is: proton pump interactor 1 (TAIR:AT4G27500.1); Has	0.996961	S	199	25.2078	1.14551e-162	285.49	266.53	245.53	82305000	96605000	66572000	103190000	82532000	110730000	71953000	39088000	64247000	38642000	38340000	87757000	82825000	68739000	24585000	56990000	11854000	49983000	3398200	47041000
AT1G20970.1	AT1G20970.1	FUNCTIONS IN: molecular_function unknown; INVOLVED IN: biological_process unknown; LOCATED IN: plasma membrane, vacuole; EXPRESSED IN: guard cell, cultured cell; BEST Arabidopsis thaliana protein match is: proton pump interactor 1 (TAIR:AT4G27500.1); Has	0.701435	S	201	0.699191	1.08104e-24	133.27	114.78	52.577	10383000	18405000	6075100	32422000	19461000	0	18746000	0	13450000	0	0	13247000	0	0	0	0	0	0	18861000	9137600
AT1G20970.1	AT1G20970.1	FUNCTIONS IN: molecular_function unknown; INVOLVED IN: biological_process unknown; LOCATED IN: plasma membrane, vacuole; EXPRESSED IN: guard cell, cultured cell; BEST Arabidopsis thaliana protein match is: proton pump interactor 1 (TAIR:AT4G27500.1); Has	0.999132	S	124	30.6108	1.64204e-176	301.43	279.59	278.98	14573000	13916000	11897000	22234000	20987000	16452000	13944000	8172900	14954000	15617000	9960500	14783000	20494000	14241000	13658000	18530000	5023500	14788000	4727600	10908000
AT1G20970.1	AT1G20970.1	FUNCTIONS IN: molecular_function unknown; INVOLVED IN: biological_process unknown; LOCATED IN: plasma membrane, vacuole; EXPRESSED IN: guard cell, cultured cell; BEST Arabidopsis thaliana protein match is: proton pump interactor 1 (TAIR:AT4G27500.1); Has	0.666667	T	203	0	1.08104e-24	133.27	114.78	59.089	10383000	18405000	6075100	32422000	19461000	0	18746000	0	13450000	0	0	13247000	0	0	0	0	0	0	3398200	9137600
AT1G20970.1	AT1G20970.1	FUNCTIONS IN: molecular_function unknown; INVOLVED IN: biological_process unknown; LOCATED IN: plasma membrane, vacuole; EXPRESSED IN: guard cell, cultured cell; BEST Arabidopsis thaliana protein match is: proton pump interactor 1 (TAIR:AT4G27500.1); Has	0.340651	T	699	0.143519	0.013454	48.848	35.42	48.848	0	0	0	0	0	0	0	0	0	0	0	0	0	0	0	0	0	0	0	0
AT1G20980.1	AT1G20980.1	squamosa promoter binding protein-like 14	1	S	45	40.4773	0.00491995	47.621	22.3	40.477	0	0	0	0	0	0	0	0	0	0	0	0	0	0	0	0	0	0	0	0
AT1G20980.1	AT1G20980.1	squamosa promoter binding protein-like 14	1	S	52	40.4773	0.00491995	47.621	22.3	40.477	0	0	0	0	0	0	0	0	0	0	0	0	0	0	0	0	0	0	0	0
AT1G20980.1	AT1G20980.1	squamosa promoter binding protein-like 14	0.473219	S	740	0	0.00435603	56.766	42.306	56.766	0	0	0	0	0	0	0	0	0	0	0	0	0	0	0	0	0	0	0	0
AT1G20980.1	AT1G20980.1	squamosa promoter binding protein-like 14	0.473219	S	741	0	0.00435603	56.766	42.306	56.766	0	0	0	0	0	0	0	0	0	0	0	0	0	0	0	0	0	0	0	0
AT1G21080.2	AT1G21080.2	DNAJ heat shock N-terminal domain-containing protein ; DNAJ heat shock N-terminal domain-containing protein	0.546383	Y	276	0.808714	0.0120119	56.122	38.027	56.122	0	4697400	0	6248700	4756500	0	0	0	0	3009700	0	0	0	5774900	0	0	0	0	0	3215800
AT1G21170.1	AT1G21170.1	Exocyst complex component SEC5	1	S	179	64.1639	7.67106e-37	177.1	131.27	177.1	7765100	7149800	6278000	11476000	7380600	8597800	10091000	4336700	6479000	9495800	7496100	10279000	9293000	8556800	8147100	24564000	2372000	10370000	3257300	10015000
AT1G21380.1	AT1G21380.1	Target of Myb protein 1	0.633677	S	284	2.78194	3.65868e-10	76.358	71.549	76.358	0	0	0	0	0	0	10746000	0	0	0	0	0	7156400	0	6779300	0	0	0	0	0
AT1G21380.1	AT1G21380.1	Target of Myb protein 1	0.999998	S	294	57.6259	6.29455e-70	193.49	186.29	167.04	0	0	0	17218000	13722000	4662100	0	1735800	2452500	5852800	0	13735000	0	3493400	0	53989000	0	0	0	0
AT1G21380.1	AT1G21380.1	Target of Myb protein 1	1	S	383	79.4623	1.08001e-20	129.84	105.38	83.397	0	25605000	43998000	15252000	20140000	60898000	14379000	0	34420000	8183300	13779000	0	0	0	8421200	71929000	7138700	0	4733700	0
AT1G21380.1	AT1G21380.1	Target of Myb protein 1	0.97309	T	466	16.5812	0.000960572	76.728	53.366	66.004	7725300	6060000	5340900	8532800	6090700	5448900	9141400	5165500	6487300	0	3902700	8231500	9483000	5889100	4289200	9062300	2206200	7574300	2708700	6005700
AT1G21580.1	AT1G21580.1	Zinc finger C-x8-C-x5-C-x3-H type family protein	0.249971	S	1160	0	0.00924352	45.115	25.873	45.115	0	0	0	0	0	0	0	0	0	0	0	0	0	0	0	0	0	0	0	0
AT1G21580.1	AT1G21580.1	Zinc finger C-x8-C-x5-C-x3-H type family protein	0.249971	S	1162	0	0.00924352	45.115	25.873	45.115	0	0	0	0	0	0	0	0	0	0	0	0	0	0	0	0	0	0	0	0
AT1G21580.1	AT1G21580.1	Zinc finger C-x8-C-x5-C-x3-H type family protein	0.249971	S	1163	0	0.00924352	45.115	25.873	45.115	0	0	0	0	0	0	0	0	0	0	0	0	0	0	0	0	0	0	0	0
AT1G21580.1	AT1G21580.1	Zinc finger C-x8-C-x5-C-x3-H type family protein	0.249971	S	1164	0	0.00924352	45.115	25.873	45.115	0	0	0	0	0	0	0	0	0	0	0	0	0	0	0	0	0	0	0	0
AT1G21580.1	AT1G21580.1	Zinc finger C-x8-C-x5-C-x3-H type family protein	0.999999	S	378	59.4697	0.00188443	67.115	45.886	67.115	2192600	1762500	1783400	6720600	3320000	3295600	3613800	1012300	1117200	2133600	2089500	3697200	3766000	2843100	2030600	3681200	503020	3381900	511490	1850500
AT1G21630.1	AT1G21630.1	Calcium-binding EF hand family protein ; Calcium-binding EF hand family protein	0.561941	Y	894	1.16366	8.91215e-20	152.13	137.65	143.4	0	0	0	0	0	0	0	0	0	0	0	34992000	30320000	28313000	0	0	0	0	0	0
AT1G21630.1	AT1G21630.1	Calcium-binding EF hand family protein ; Calcium-binding EF hand family protein	0.987559	S	817	20.1619	2.47283e-07	112.02	90.574	89.507	3544400	3225200	3389600	6702200	5768200	6465300	5089100	2369200	3650400	3062000	4770700	4369800	4775200	4436700	3721700	4668700	1085000	5545600	1524700	3111600
AT1G21630.1	AT1G21630.1	Calcium-binding EF hand family protein ; Calcium-binding EF hand family protein	1	S	1105	77.6963	3.15406e-37	191.96	161.63	149.99	23353000	15627000	15809000	22931000	22623000	33688000	18060000	12203000	20845000	17121000	15015000	23211000	24488000	20607000	16999000	23186000	5440400	17302000	4922300	13578000
AT1G21630.1	AT1G21630.1	Calcium-binding EF hand family protein ; Calcium-binding EF hand family protein	0.999969	S	1137	45.1353	0.00142038	55.549	45.563	55.549	0	0	6401100	0	7414800	13229000	7029000	0	9137800	5626600	0	0	0	0	3425700	10124000	3071200	0	0	6141100
AT1G21630.1	AT1G21630.1	Calcium-binding EF hand family protein ; Calcium-binding EF hand family protein	0.998002	S	1172	29.9963	0.00441983	45.368	34.204	44.203	0	37769000	33675000	0	0	0	0	0	42688000	34069000	37046000	59379000	0	0	0	52720000	0	55549000	0	0
AT1G21630.1	AT1G21630.1	Calcium-binding EF hand family protein ; Calcium-binding EF hand family protein	0.5	S	866	0	4.24985e-12	113.93	103.94	113.93	9129700	5888200	0	9835700	4736700	9826700	9977400	12047000	6591500	5336000	9716200	10956000	6182500	10802000	8141700	21976000	7480100	0	9820000	0
AT1G21630.1	AT1G21630.1	Calcium-binding EF hand family protein ; Calcium-binding EF hand family protein	0.5	S	867	0	4.24985e-12	113.93	103.94	113.93	9129700	5888200	0	9835700	4736700	9826700	9977400	12047000	6591500	5336000	9716200	10956000	6182500	10802000	8141700	21976000	7480100	0	9820000	0
AT1G21630.1	AT1G21630.1	Calcium-binding EF hand family protein ; Calcium-binding EF hand family protein	0.995863	S	961	24.7967	6.16379e-11	114.63	97.174	114.63	6799500	2157100	2451400	1916800	9753900	15093000	2505300	3461400	6363700	1123800	3578100	7785100	13034000	9394100	1987000	25615000	2765200	6298100	219580	7181800
AT1G21630.1	AT1G21630.1	Calcium-binding EF hand family protein ; Calcium-binding EF hand family protein	0.817066	S	967	10.0625	3.52344e-05	84.371	58.241	84.371	0	0	0	0	0	0	0	0	0	0	0	0	0	0	0	24682000	0	0	0	0
AT1G21630.1	AT1G21630.1	Calcium-binding EF hand family protein ; Calcium-binding EF hand family protein	0.63555	S	970	5.0175	0.000318494	77.53	63.489	58.722	2270800	0	1373100	5766700	0	8058100	0	865500	0	0	0	0	0	0	0	21156000	679300	5371600	299730	1649500
AT1G21630.1	AT1G21630.1	Calcium-binding EF hand family protein ; Calcium-binding EF hand family protein	0.963633	S	1002	13.3974	0.0231923	46.131	40.009	46.131	571980	412790	753980	2168800	2036300	0	719910	505840	0	0	0	0	0	0	0	0	0	0	0	0
AT1G21630.1	AT1G21630.1	Calcium-binding EF hand family protein ; Calcium-binding EF hand family protein	0.594892	S	1005	1.54424	0.000133488	72.705	66.288	46.131	571980	412790	753980	2168800	2036300	0	719910	505840	0	0	0	4109200	0	0	0	0	0	0	0	0
AT1G21630.1	AT1G21630.1	Calcium-binding EF hand family protein ; Calcium-binding EF hand family protein	0.481255	S	1087	0	0.000541719	53.747	45.481	53.747	0	0	0	0	0	0	0	0	0	0	0	0	0	0	0	0	0	0	0	0
AT1G21630.1	AT1G21630.1	Calcium-binding EF hand family protein ; Calcium-binding EF hand family protein	0.474742	S	1049	0	8.89241e-05	78.287	66.311	71.879	0	0	0	0	0	0	0	0	0	0	0	0	0	0	0	0	0	0	0	0
AT1G21630.1	AT1G21630.1	Calcium-binding EF hand family protein ; Calcium-binding EF hand family protein	0.763805	S	1121	6.78139	0.00186064	60.564	34.974	54.004	0	0	0	8789900	0	0	0	0	0	0	0	8749200	7202700	0	0	0	0	0	0	0
AT1G21630.1	AT1G21630.1	Calcium-binding EF hand family protein ; Calcium-binding EF hand family protein	0.689927	S	1124	6.08833	0.00158751	62.861	36.713	54.004	6214500	0	5105300	8789900	5522900	0	4295700	3066400	4411200	2951100	3289800	8749200	7202700	5928700	0	0	1151300	5460200	1277100	3876700
AT1G21630.1	AT1G21630.1	Calcium-binding EF hand family protein ; Calcium-binding EF hand family protein	0.556924	S	1126	1.45192	0.00762769	53.328	36.047	46.89	0	0	0	0	0	7743400	0	0	0	0	0	0	0	0	0	0	0	0	0	0
AT1G21630.1	AT1G21630.1	Calcium-binding EF hand family protein ; Calcium-binding EF hand family protein	0.99923	S	896	32.3141	1.75636e-53	197.46	163.08	178.19	14189000	14363000	0	13541000	13253000	15487000	9008600	6083900	10218000	8562300	8563400	0	16786000	13888000	9211400	8039700	0	10747000	0	6794500
AT1G21630.1	AT1G21630.1	Calcium-binding EF hand family protein ; Calcium-binding EF hand family protein	0.999979	S	1145	46.781	1.97681e-42	187.59	166.73	187.59	19051000	17075000	14367000	0	19740000	22228000	13911000	8033400	17393000	13147000	10124000	14319000	17181000	20528000	8493300	8297200	5568900	10633000	4933100	6208200
AT1G21630.1	AT1G21630.1	Calcium-binding EF hand family protein ; Calcium-binding EF hand family protein	0.492845	T	972	0.867221	0.000195877	69.979	53.629	46.839	0	0	0	0	0	0	0	0	0	0	0	0	0	0	0	0	0	0	0	0
AT1G21630.1	AT1G21630.1	Calcium-binding EF hand family protein ; Calcium-binding EF hand family protein	0.876392	T	1006	8.58692	2.6374e-06	99.392	90.296	82.707	0	1110600	2761200	7568300	4120200	4054300	0	0	2798500	0	1894700	854740	0	0	2459100	0	266410	4789600	246660	2048400
AT1G21630.1	AT1G21630.1	Calcium-binding EF hand family protein ; Calcium-binding EF hand family protein	0.650495	T	1088	5.99809	0.000541719	53.747	45.481	40.837	0	0	0	0	0	4522700	0	0	0	0	0	0	0	0	0	0	0	0	0	0
AT1G21630.1	AT1G21630.1	Calcium-binding EF hand family protein ; Calcium-binding EF hand family protein	0.713759	T	1050	5.43084	8.89241e-05	78.287	66.311	42.068	0	0	0	0	0	0	0	1938100	2896100	0	0	0	0	0	0	3941300	0	0	0	0
AT1G21630.1	AT1G21630.1	Calcium-binding EF hand family protein ; Calcium-binding EF hand family protein	0.622553	T	1125	1.0524	0.00158751	62.861	36.713	60.564	6214500	0	5105300	0	5522900	7743400	4295700	3066400	4411200	2951100	3289800	0	7202700	5928700	4992500	0	1151300	5460200	1277100	3876700
AT1G21630.1	AT1G21630.1	Calcium-binding EF hand family protein ; Calcium-binding EF hand family protein	0.414882	T	891	0	0.000151817	76.301	59.807	76.301	0	0	0	0	0	0	0	0	0	0	0	0	0	0	0	0	0	0	0	0
AT1G21630.1	AT1G21630.1	Calcium-binding EF hand family protein ; Calcium-binding EF hand family protein	0.550956	T	900	1.92642	8.19854e-09	113.23	93.154	113.23	0	0	0	0	25319000	0	0	0	0	0	0	0	0	0	0	0	0	0	0	0
AT1G21660.1	AT1G21660.1	Chaperone DnaJ-domain superfamily protein	0.329986	S	153	1.69532	0.00119028	58.831	51.107	58.831	0	0	0	0	0	0	0	0	0	0	0	0	0	0	0	0	0	0	0	0
AT1G21730.1	AT1G21730.1	P-loop containing nucleoside triphosphate hydrolases superfamily protein	0.77245	S	13	6.675	0.025126	45.077	25.835	45.077	9132900	4139500	6055400	6769600	8964200	5401600	6987700	6092500	9934600	3807500	4157300	6979400	5656300	6201900	6843200	6549500	4209500	9428100	2204900	7273500
AT1G22060.1	AT1G22060.1	LOCATED IN: vacuole; EXPRESSED IN: 23 plant structures; EXPRESSED DURING: 13 growth stages; BEST Arabidopsis thaliana protein match is: FBD, F-box and Leucine Rich Repeat domains containing protein (TAIR:AT1G22000.1); Has 84739 Blast hits to 38714 protein	0.992354	S	252	22.8657	0.000226101	77.912	61.658	65.842	3216700	1416100	0	2196300	0	0	1808900	0	1349900	2060900	1805400	3179100	2032300	1578900	1097600	3323500	1032100	2550600	1928300	0
AT1G22060.1	AT1G22060.1	LOCATED IN: vacuole; EXPRESSED IN: 23 plant structures; EXPRESSED DURING: 13 growth stages; BEST Arabidopsis thaliana protein match is: FBD, F-box and Leucine Rich Repeat domains containing protein (TAIR:AT1G22000.1); Has 84739 Blast hits to 38714 protein	1	S	261	80.0672	5.78448e-37	188.58	164.83	187.56	7313700	4847400	8232800	15255000	6845300	9282200	7482300	4601400	4890400	5832100	6383000	7521600	8880800	7190900	7383900	6918000	2902000	9430900	0	5043100
AT1G22230.1	AT1G22230.1	unknown protein; LOCATED IN: chloroplast; BEST Arabidopsis thaliana protein match is: unknown protein (TAIR:AT1G78110.1); Has 2358 Blast hits to 1759 proteins in 159 species: Archae - 2; Bacteria - 36; Metazoa - 1046; Fungi - 203; Plants - 157; Viruses -	0.973601	S	79	15.668	6.10155e-11	120.77	99.47	116.55	13660000	7641800	11614000	16798000	13624000	13453000	10984000	9745600	723890	0	6969900	16067000	0	15454000	9490500	11535000	5779800	14829000	4210700	13132000
AT1G22280.2	AT1G22280.2	phytochrome-associated protein phosphatase type 2C ; phytochrome-associated protein phosphatase type 2C ; phytochrome-associated protein phosphatase type 2C	0.935821	S	118	11.646	3.91058e-112	258.96	232.94	199.84	0	45648000	39188000	53170000	33592000	32761000	0	29023000	44160000	0	32872000	45860000	42992000	33564000	29615000	43211000	14906000	29943000	16657000	30458000
AT1G22280.2	AT1G22280.2	phytochrome-associated protein phosphatase type 2C ; phytochrome-associated protein phosphatase type 2C ; phytochrome-associated protein phosphatase type 2C	0.720989	S	119	4.12461	1.3217e-49	205.28	179.27	205.28	34720000	0	0	0	0	0	35481000	0	0	24312000	0	0	0	0	0	0	0	0	0	0
AT1G22300.2	AT1G22300.2	general regulatory factor 10 ; general regulatory factor 10 ; general regulatory factor 10	0.988974	S	209	19.6218	0.0033101	56.215	43.654	56.215	473480	414410	726820	0	2087900	859340	1095600	490460	300720	304810	544420	0	926100	671280	778490	2004000	0	0	125060	426960
AT1G22310.2	AT1G22310.2	methyl-CPG-binding domain 8	1	S	103	40.552	3.31287e-05	79.089	62.063	40.552	16592000	9526500	0	19156000	14855000	16392000	11610000	0	14196000	10916000	7282900	17625000	19476000	12191000	0	10170000	4235400	16337000	0	0
AT1G22530.1	AT1G22530.1	PATELLIN 2	0.590976	Y	85	4.81117	0.0049298	49.66	41.385	49.66	0	0	0	1914200	0	1291700	1398600	225500	0	482220	618930	0	1097700	774850	0	3761600	0	630050	217140	729360
AT1G22530.1	AT1G22530.1	PATELLIN 2	0.5	S	77	0	1.27413e-32	172.42	155.67	51.276	7236800	0	0	9835400	0	0	0	0	0	14854000	9461100	0	14336000	0	0	0	3112300	0	1251500	3580600
AT1G22530.1	AT1G22530.1	PATELLIN 2	0.999934	S	79	41.8169	4.94265e-181	296.37	275.91	293.01	3578800	0	0	35592000	0	0	95206000	29262000	23421000	60042000	43192000	85614000	54569000	56000000	17862000	95293000	26046000	20156000	7409700	21411000
AT1G22530.1	AT1G22530.1	PATELLIN 2	1	S	403	69.1649	1.45024e-19	162.59	120.38	162.59	6863800	8304300	4057200	0	5234100	1470200	3262300	1141000	5996500	0	0	0	0	0	0	22005000	1780100	5939900	1362800	2818700
AT1G22530.1	AT1G22530.1	PATELLIN 2	0.999997	S	51	57.7716	0.00105582	62.287	49.905	62.287	1664800	0	1950500	0	0	2905700	1814200	0	0	2463900	0	2348900	3531800	2286300	0	0	0	3161200	720600	0
AT1G22620.1	AT1G22620.1	Phosphoinositide phosphatase family protein	0.659868	S	456	3.97794	0.0170126	41.53	30.09	41.53	3605700	0	2685200	9410800	7116000	3828400	0	1956300	2474000	3969800	3058200	5511700	3065100	4700300	3212600	2620600	976270	4091100	1555800	2829900
AT1G22620.1	AT1G22620.1	Phosphoinositide phosphatase family protein	1	S	472	67.4687	1.03116e-07	107.87	83.592	91.812	0	0	0	2893600	1178900	0	2319400	135170	0	243670	748150	933710	609330	738460	911490	3188400	0	1082700	0	553290
AT1G22790.2	AT1G22790.2	unknown protein; FUNCTIONS IN: molecular_function unknown; INVOLVED IN: biological_process unknown; LOCATED IN: plasma membrane; EXPRESSED IN: 22 plant structures; EXPRESSED DURING: 13 growth stages; BEST Arabidopsis thaliana protein match is: unknown pro	0.865195	S	103	8.11844	1.69071e-05	85.42	55.613	82.908	0	0	0	0	4049600	4402700	0	0	0	0	0	0	4518900	4863300	3092000	0	0	0	0	0
AT1G22790.2	AT1G22790.2	unknown protein; FUNCTIONS IN: molecular_function unknown; INVOLVED IN: biological_process unknown; LOCATED IN: plasma membrane; EXPRESSED IN: 22 plant structures; EXPRESSED DURING: 13 growth stages; BEST Arabidopsis thaliana protein match is: unknown pro	0.879725	S	104	8.82525	7.13017e-06	100.11	61.836	90.444	4524300	0	0	6551700	0	0	0	0	0	1277900	0	3103100	0	0	0	4156500	0	0	0	2689300
AT1G23080.2	AT1G23080.2	Auxin efflux carrier family protein ; Auxin efflux carrier family protein ; Auxin efflux carrier family protein	0.566203	Y	237	1.09238	0.00101707	67.456	55.591	44.005	1324000	0	0	2652400	0	0	0	864990	1972000	2233100	0	2643600	2351700	1725900	1458400	2938300	0	0	0	792980
AT1G23080.2	AT1G23080.2	Auxin efflux carrier family protein ; Auxin efflux carrier family protein ; Auxin efflux carrier family protein	0.420138	S	291	1.61099	0.00683001	57.836	44.436	57.836	0	0	0	0	0	0	0	0	0	0	0	0	0	0	0	0	0	0	0	0
AT1G23080.2	AT1G23080.2	Auxin efflux carrier family protein ; Auxin efflux carrier family protein ; Auxin efflux carrier family protein	0.935571	S	297	11.6585	5.64983e-09	133.52	112.74	112.67	8192100	8737700	8751400	0	11440000	6879300	13480000	3171700	0	0	0	0	14218000	8401400	0	0	0	0	1940400	0
AT1G23080.2	AT1G23080.2	Auxin efflux carrier family protein ; Auxin efflux carrier family protein ; Auxin efflux carrier family protein	0.320332	S	238	0	0.000156738	78.234	68.802	52.555	0	0	0	0	0	0	0	0	0	0	0	0	0	0	0	0	0	0	0	0
AT1G23080.2	AT1G23080.2	Auxin efflux carrier family protein ; Auxin efflux carrier family protein ; Auxin efflux carrier family protein	0.510888	T	241	0	1.26819e-36	186.56	146.65	44.005	1324000	0	0	2652400	0	0	0	864990	1972000	2233100	0	2643600	2351700	1725900	1458400	2938300	0	0	0	792980
AT1G23080.2	AT1G23080.2	Auxin efflux carrier family protein ; Auxin efflux carrier family protein ; Auxin efflux carrier family protein	0.49956	T	242	0	1.26819e-36	186.56	146.65	186.56	0	0	0	0	0	0	0	0	0	0	0	0	0	0	0	0	0	0	0	0
AT1G23170.1	AT1G23170.1	Protein of unknown function DUF2359, transmembrane ; Protein of unknown function DUF2359, transmembrane	0.949269	S	118	12.7212	8.2165e-33	171.5	155.15	171.5	0	12791000	7512500	7555800	10397000	21809000	10413000	0	6971900	0	3790000	0	12628000	12401000	0	11939000	0	8926800	0	7190000
AT1G23170.1	AT1G23170.1	Protein of unknown function DUF2359, transmembrane ; Protein of unknown function DUF2359, transmembrane	0.574809	S	120	1.30988	0.000151325	71.073	57.669	71.073	0	0	3879500	0	0	0	0	1316700	0	0	1145400	0	0	0	0	6294700	0	0	0	0
AT1G23190.1;AT1G70730.1	AT1G23190.1	Phosphoglucomutase/phosphomannomutase family protein ; Phosphoglucomutase/phosphomannomutase family protein ; Phosphoglucomutase/phosphomannomutase family protein ; Phosphoglucomutase/phosphomannomutase family protein	1	S	123	64.8014	0	362.85	330.06	350.85	19215000	90742000	39601000	380510000	229850000	89426000	243490000	24388000	101320000	183210000	183680000	240410000	290480000	81510000	57357000	624640000	8233900	73976000	18207000	145190000
AT1G23190.1;AT1G70730.1	AT1G23190.1	Phosphoglucomutase/phosphomannomutase family protein ; Phosphoglucomutase/phosphomannomutase family protein ; Phosphoglucomutase/phosphomannomutase family protein ; Phosphoglucomutase/phosphomannomutase family protein	0.499856	T	121	0	1.47752e-05	85.595	76.627	85.595	0	0	0	0	0	0	0	0	0	0	0	0	0	0	0	0	0	0	0	0
AT1G23860.3	AT1G23860.3	RS-containing zinc finger protein 21 ; RS-containing zinc finger protein 21 ; RS-containing zinc finger protein 21	0.99999	S	123	53.0323	0.000181998	80.245	54.544	77.062	25983000	0	11680000	32521000	20146000	26836000	22596000	0	24810000	14480000	0	18311000	24810000	19219000	8230500	13345000	5149700	21932000	15784000	27364000
AT1G24190.2	AT1G24190.2	SIN3-like 3 ; SIN3-like 3	1	S	894	112.615	5.89101e-13	126.18	114.88	126.18	7776400	7344000	8904600	8148600	11241000	11651000	12764000	5223000	9226900	0	0	0	7187500	9237400	6391100	7084200	1355400	7414500	0	3759900
AT1G24267.1	AT1G24267.1	Protein of unknown function (DUF1664) ; Protein of unknown function (DUF1664)	0.981195	S	291	17.3037	2.94133e-21	160.87	121.3	160.87	20776000	21438000	16465000	33721000	4431100	0	19826000	13736000	24885000	13604000	11754000	39255000	37873000	32371000	19898000	31338000	7157600	32828000	8346300	0
AT1G24267.1	AT1G24267.1	Protein of unknown function (DUF1664) ; Protein of unknown function (DUF1664)	0.55485	S	293	2.17811	7.07412e-05	73.067	53.823	73.067	0	0	0	0	0	0	0	0	0	0	0	0	0	0	0	0	0	0	0	14081000
AT1G24267.1	AT1G24267.1	Protein of unknown function (DUF1664) ; Protein of unknown function (DUF1664)	0.773668	S	330	5.84712	3.06084e-36	184.21	160.99	112.67	14160000	0	0	20925000	0	18506000	0	0	0	7386400	13592000	15412000	0	0	0	0	0	22505000	0	13247000
AT1G24267.1	AT1G24267.1	Protein of unknown function (DUF1664) ; Protein of unknown function (DUF1664)	0.82391	T	289	6.92865	1.42578e-10	133.16	88.648	89.507	0	0	0	0	20013000	37022000	0	0	0	0	0	0	0	0	0	0	0	0	0	0
AT1G24267.1	AT1G24267.1	Protein of unknown function (DUF1664) ; Protein of unknown function (DUF1664)	0.700998	T	328	3.70435	2.40008e-35	183.73	160.35	183.73	0	14949000	0	0	19811000	0	0	10625000	0	0	0	15412000	19464000	18622000	0	18093000	0	0	6040400	13247000
AT1G24300.2	AT1G24300.2	GYF domain-containing protein ; GYF domain-containing protein	0.339619	Y	420	0.154984	0.000100181	58.877	31.557	58.877	0	0	0	0	0	0	0	0	0	0	0	0	0	0	0	0	0	0	0	0
AT1G24300.2	AT1G24300.2	GYF domain-containing protein ; GYF domain-containing protein	0.302469	S	415	1.15784	0.0172269	53.865	41.943	53.865	0	0	0	0	0	0	0	0	0	0	0	0	0	0	0	0	0	0	0	0
AT1G24300.2	AT1G24300.2	GYF domain-containing protein ; GYF domain-containing protein	0.414954	S	423	0.784497	0.000706022	54.259	43.57	54.259	0	0	0	0	0	0	0	0	0	0	0	0	0	0	0	0	0	0	0	0
AT1G24300.2	AT1G24300.2	GYF domain-containing protein ; GYF domain-containing protein	0.70742	S	426	5.92101	4.23461e-10	97.804	84.616	58.498	0	0	0	0	5308300	8085700	6782200	0	4975900	0	0	0	4586400	7509000	0	0	0	0	0	0
AT1G24300.2	AT1G24300.2	GYF domain-containing protein ; GYF domain-containing protein	0.605038	S	50	1.8524	0.00400267	52.79	43.859	52.79	5132300	0	4128900	0	5518900	8477000	0	2769500	5275900	0	3260400	9582500	8635800	0	8292600	7870400	2960900	9658500	3416200	4125400
AT1G24300.2	AT1G24300.2	GYF domain-containing protein ; GYF domain-containing protein	1	S	1306	69.0102	0.000261455	69.01	48.109	69.01	3017700	3592200	2826800	5054400	3658600	0	3025100	1786100	0	0	1748900	4726100	4211600	3569800	2808900	4723100	948270	0	0	1712400
AT1G24300.2	AT1G24300.2	GYF domain-containing protein ; GYF domain-containing protein	1	S	1256	80.122	1.02242e-38	185.27	158.56	136.6	16644000	9441400	7679100	14661000	16399000	13463000	8916400	6605400	7646600	10479000	12250000	13598000	11731000	12574000	12245000	32338000	6686200	13159000	3489300	8928800
AT1G24300.2	AT1G24300.2	GYF domain-containing protein ; GYF domain-containing protein	0.815607	S	1399	7.14414	0.0186134	47.621	29.182	47.621	0	0	0	3893200	0	0	0	0	0	0	0	0	0	0	0	2243600	0	0	0	0
AT1G24300.2	AT1G24300.2	GYF domain-containing protein ; GYF domain-containing protein	0.551	T	52	0.889354	0.00421225	47.728	35.962	47.728	0	0	0	0	0	0	0	0	0	0	0	9582500	0	7346800	0	0	0	0	0	0
AT1G24300.2;AT1G27430.1	AT1G24300.2	GYF domain-containing protein ; GYF domain-containing protein ; GYF domain-containing protein	0.377782	S	29	0.397667	0.0102176	44.196	31.565	44.196	0	0	0	0	0	0	0	0	0	0	0	0	0	0	0	0	0	0	0	0
AT1G24300.2;AT1G27430.1	AT1G24300.2	GYF domain-containing protein ; GYF domain-containing protein ; GYF domain-containing protein	0.999922	S	33	41.2655	8.4608e-50	209.31	196.47	209.31	2657800	0	0	7315500	3786700	4997600	5176400	0	2307800	0	0	3941400	3813000	3296300	1469800	14226000	0	2964500	452700	0
AT1G24460.2	AT1G24460.2	unknown protein; FUNCTIONS IN: molecular_function unknown; INVOLVED IN: biological_process unknown; LOCATED IN: cellular_component unknown; EXPRESSED IN: 22 plant structures; EXPRESSED DURING: 14 growth stages; BEST Arabidopsis thaliana protein match is:	0.751947	S	1612	5.85743	4.25944e-05	76.759	56.92	60.641	0	0	0	0	0	0	4404500	1414000	3867700	0	2903700	2837900	4897900	0	0	4350300	0	0	0	0
AT1G24460.2	AT1G24460.2	unknown protein; FUNCTIONS IN: molecular_function unknown; INVOLVED IN: biological_process unknown; LOCATED IN: cellular_component unknown; EXPRESSED IN: 22 plant structures; EXPRESSED DURING: 14 growth stages; BEST Arabidopsis thaliana protein match is:	0.380458	S	1614	1.34398	0.00532931	52.555	26.616	52.555	0	0	0	0	0	0	0	0	0	0	0	0	0	0	0	0	0	0	0	0
AT1G24460.2	AT1G24460.2	unknown protein; FUNCTIONS IN: molecular_function unknown; INVOLVED IN: biological_process unknown; LOCATED IN: cellular_component unknown; EXPRESSED IN: 22 plant structures; EXPRESSED DURING: 14 growth stages; BEST Arabidopsis thaliana protein match is:	0.995242	S	1631	23.2098	0.000305233	70.089	59.184	70.089	5474600	5121700	5024200	0	7285100	0	0	0	5294500	4683700	3729000	0	8096300	6209900	5779200	7284000	1777700	0	2542000	0
AT1G24460.2	AT1G24460.2	unknown protein; FUNCTIONS IN: molecular_function unknown; INVOLVED IN: biological_process unknown; LOCATED IN: cellular_component unknown; EXPRESSED IN: 22 plant structures; EXPRESSED DURING: 14 growth stages; BEST Arabidopsis thaliana protein match is:	0.54955	T	1613	2.07688	0.000116693	72.891	55.866	55.314	0	3877400	2923200	4594900	0	7840000	5407400	2592500	0	0	1660400	3508100	0	0	0	4633000	0	4395300	0	0
AT1G24460.2	AT1G24460.2	unknown protein; FUNCTIONS IN: molecular_function unknown; INVOLVED IN: biological_process unknown; LOCATED IN: cellular_component unknown; EXPRESSED IN: 22 plant structures; EXPRESSED DURING: 14 growth stages; BEST Arabidopsis thaliana protein match is:	0.74257	T	64	4.6012	2.99888e-05	85.387	77.993	85.387	4396400	2094300	3181000	4350100	3626200	3022700	3011900	929960	0	0	1734800	0	5288800	1814000	2910400	2374600	393850	2544400	857190	0
AT1G24460.2	AT1G24460.2	unknown protein; FUNCTIONS IN: molecular_function unknown; INVOLVED IN: biological_process unknown; LOCATED IN: cellular_component unknown; EXPRESSED IN: 22 plant structures; EXPRESSED DURING: 14 growth stages; BEST Arabidopsis thaliana protein match is:	0.976381	T	65	16.1654	1.83406e-07	106.11	93.448	103.02	4396400	2094300	3181000	4350100	3626200	3022700	3011900	929960	0	0	1734800	0	5288800	1814000	2910400	2374600	393850	2544400	857190	0
AT1G24560.1	AT1G24560.1	unknown protein; BEST Arabidopsis thaliana protein match is: unknown protein (TAIR:AT3G49055.1); Has 71940 Blast hits to 38124 proteins in 2481 species: Archae - 1358; Bacteria - 12126; Metazoa - 32861; Fungi - 6786; Plants - 4024; Viruses - 195; Other Eu	0.997707	S	12	26.3861	1.40126e-08	108.28	94.703	108.28	2284100	0	1113200	1950700	2324700	0	0	0	1552400	0	1610100	1832300	1607300	1756300	1436200	5487600	541520	1720500	308460	979920
AT1G24560.1	AT1G24560.1	unknown protein; BEST Arabidopsis thaliana protein match is: unknown protein (TAIR:AT3G49055.1); Has 71940 Blast hits to 38124 proteins in 2481 species: Archae - 1358; Bacteria - 12126; Metazoa - 32861; Fungi - 6786; Plants - 4024; Viruses - 195; Other Eu	0.5	S	16	0	0.000961666	46.408	39.369	46.408	0	0	0	0	3272600	0	0	0	0	0	0	0	0	0	0	0	0	0	0	0
AT1G24706.1	AT1G24706.1	THO2 ; THO2	0.560245	T	1322	2.30561	0.00223239	91.812	61.831	91.812	0	7876600	6172800	8784000	0	0	0	2930600	0	0	0	9112900	9793200	7084600	3928200	7307100	2456900	0	0	4922800
AT1G24764.1	AT1G24764.1	microtubule-associated proteins 70-2	0.997781	S	448	30.0383	2.28982e-11	126.1	87.695	126.1	8528400	7625800	6854000	22034000	12487000	12462000	7900000	3706400	6296900	8205800	8831300	16743000	11930000	13230000	7423000	11546000	0	10325000	3642500	8573600
AT1G24764.1	AT1G24764.1	microtubule-associated proteins 70-2	0.923645	S	610	10.8674	8.94428e-05	81.494	60.974	78.324	0	0	0	1534200	0	0	0	0	0	3226200	0	1010000	7084100	0	0	0	0	0	0	0
AT1G24764.1	AT1G24764.1	microtubule-associated proteins 70-2	0.819539	S	612	6.59641	5.55076e-05	85.288	69.399	85.288	0	0	0	0	0	0	0	4115200	0	0	0	0	0	0	0	5659700	0	0	0	0
AT1G25260.1	AT1G25260.1	Ribosomal protein L10 family protein	1	S	230	140.703	9.64116e-287	358.02	349.63	337.68	23449000	24375000	26004000	32692000	42161000	60182000	14490000	23430000	38994000	19171000	10069000	58383000	68805000	41172000	21586000	109050000	11334000	48018000	3793100	38665000
AT1G25260.1	AT1G25260.1	Ribosomal protein L10 family protein	0.5	S	235	0	9.39358e-06	113.88	95.825	113.88	0	528340	0	0	647690	4222600	817670	0	0	0	0	0	0	0	1012700	9529600	0	0	0	2269500
AT1G25260.1	AT1G25260.1	Ribosomal protein L10 family protein	0.500001	T	234	0	9.39358e-06	113.88	95.825	113.88	0	528340	0	0	647690	4222600	817670	0	0	0	0	0	0	0	1012700	9529600	0	0	0	2269500
AT1G25280.1	AT1G25280.1	tubby like protein 10	0.999994	S	50	55.3807	0.000277039	70.412	54.873	70.412	440730	0	182030	424680	736040	1434400	890480	278460	512660	1471500	836810	1611500	679510	777150	521840	2522700	465860	637890	97910	1002300
AT1G25570.1	AT1G25570.1	Di-glucose binding protein with Leucine-rich repeat domain	1	S	606	80.8684	1.28314e-06	101.32	85.096	91.62	3938300	4282500	5550000	8970300	4925000	8336600	6019700	2838600	4714600	4187000	1038400	6349900	2738800	5733500	3487100	5609100	1217400	6349400	0	4514700
AT1G26110.2	AT1G26110.2	decapping 5 ; decapping 5	0.980295	S	382	17.0601	4.85796e-28	152.02	146.9	152.02	729560	1235700	643890	12131000	5212100	5013400	0	860490	1223000	2524700	0	6962900	5284800	1884500	1892700	23544000	464370	5269400	0	0
AT1G26110.2	AT1G26110.2	decapping 5 ; decapping 5	0.928546	S	491	11.1378	3.91874e-11	119.27	103.72	119.27	0	0	0	0	0	12343000	0	0	3216800	7032100	0	10376000	8633700	9027800	6924500	10279000	0	11399000	0	0
AT1G26170.1	AT1G26170.1	ARM repeat superfamily protein	1	S	311	83.4064	9.38122e-93	215.08	184.1	198.98	0	38672000	0	20459000	0	15983000	0	0	33287000	0	0	13178000	0	9875700	0	0	11362000	26837000	0	0
AT1G26190.1	AT1G26190.1	Phosphoribulokinase / Uridine kinase family	0.657095	S	436	3.72488	2.16425e-05	105.03	84.725	105.03	0	0	0	0	0	0	0	0	1469200	0	0	0	0	0	3824400	0	0	0	0	0
AT1G26190.1	AT1G26190.1	Phosphoribulokinase / Uridine kinase family	0.720233	S	437	5.23436	1.58861e-121	234.85	175.01	119.54	0	1126700	1226300	7214300	0	3927800	0	0	1469200	629680	658770	0	3119100	2099900	3824400	5404600	0	0	0	27758000
AT1G26190.1	AT1G26190.1	Phosphoribulokinase / Uridine kinase family	0.765366	S	438	3.29276	1.65583e-26	157.23	127.57	157.23	0	1126700	1226300	0	3400100	3927800	0	0	1469200	629680	658770	3345500	0	2099900	0	5404600	0	0	0	0
AT1G26190.1	AT1G26190.1	Phosphoribulokinase / Uridine kinase family	0.916917	S	439	10.7215	2.68385e-62	212.43	162.72	204.17	29115000	25027000	32066000	7214300	3400100	3927800	1243700	0	0	629680	658770	3345500	3119100	2099900	0	5404600	0	3468700	10866000	1486200
AT1G26270.1	AT1G26270.1	Phosphatidylinositol 3- and 4-kinase family protein	0.330734	S	566	0	3.41636e-05	67.364	54.436	67.364	0	0	0	0	0	0	0	0	0	0	0	0	0	0	0	0	0	0	0	0
AT1G26270.1	AT1G26270.1	Phosphatidylinositol 3- and 4-kinase family protein	0.330734	S	567	0	3.41636e-05	67.364	54.436	67.364	0	0	0	0	0	0	0	0	0	0	0	0	0	0	0	0	0	0	0	0
AT1G26270.1	AT1G26270.1	Phosphatidylinositol 3- and 4-kinase family protein	0.330734	S	571	0	3.41636e-05	67.364	54.436	67.364	0	0	0	0	0	0	0	0	0	0	0	0	0	0	0	0	0	0	0	0
AT1G26300.1	AT1G26300.1	BSD domain-containing protein	1	S	295	105.17	2.28897e-31	159.5	113.84	105.17	48277000	25551000	50649000	35987000	32324000	61619000	25023000	28307000	34801000	16966000	23097000	53903000	70546000	53198000	24448000	63068000	13934000	75803000	12701000	34498000
AT1G26470.1	AT1G26470.1	FUNCTIONS IN: molecular_function unknown; INVOLVED IN: regulation of transcription; LOCATED IN: nucleus, H4/H2A histone acetyltransferase complex; EXPRESSED IN: 23 plant structures; EXPRESSED DURING: 15 growth stages; CONTAINS InterPro DOMAIN/s: CT20 (Int	0.905908	S	26	9.83534	0.000673907	65.598	53.044	65.598	0	0	7297100	6614800	9331700	4846400	0	3086800	0	4725200	3967000	8508100	8107400	5929500	3213700	5590600	0	0	3449500	7457200
AT1G26630.1	AT1G26630.1	Eukaryotic translation initiation factor 5A-1 (eIF-5A 1) protein ; Eukaryotic translation initiation factor 5A-1 (eIF-5A 1) protein	1	S	2	87.856	6.45216e-131	268.61	209.36	114.63	42663000	24871000	14597000	42388000	30333000	34916000	39148000	9001800	20070000	28131000	11616000	18188000	32939000	24327000	16749000	12765000	4762800	18836000	9091800	15501000
AT1G26880.2	AT1G26880.2	Ribosomal protein L34e superfamily protein ; ribosomal protein L34 ; Ribosomal protein L34e superfamily protein	0.499996	S	83	0	0.00616159	51.013	25.576	51.013	0	0	0	0	0	0	0	0	0	0	2477200	0	0	0	0	0	0	5716800	0	0
AT1G26880.2	AT1G26880.2	Ribosomal protein L34e superfamily protein ; ribosomal protein L34 ; Ribosomal protein L34e superfamily protein	0.89041	S	85	9.09819	0.0007893	64.55	39.696	64.55	3540300	1140600	4129000	0	0	6219600	3716100	2510100	0	0	2477200	4965700	0	3748600	4071200	1931800	1561400	5716800	1582400	3543100
AT1G27090.1	AT1G27090.1	glycine-rich protein	0.637893	S	6	1.96426	0.000786465	74.46	62.928	74.46	4256400	2839500	0	7806500	3930100	10418000	2551600	1910700	3205200	0	1977100	3832600	3789300	3629500	3617000	0	0	4787400	0	0
AT1G27090.1	AT1G27090.1	glycine-rich protein	0.999582	S	7	33.7905	7.77804e-154	289.87	249.16	232.74	42297000	38473000	38192000	94955000	50787000	65488000	31774000	22570000	30989000	31173000	24788000	50242000	56809000	40876000	41468000	42937000	14097000	53469000	12409000	32621000
AT1G27090.1	AT1G27090.1	glycine-rich protein	1	S	289	103.658	4.36596e-93	247.45	212.1	166.04	33036000	20271000	29712000	50099000	36256000	39322000	19839000	16199000	30620000	20333000	19230000	41423000	36925000	28119000	30026000	25871000	10898000	32476000	11466000	24553000
AT1G27090.1	AT1G27090.1	glycine-rich protein	0.979464	T	4	14.421	0.00587756	50.079	40.424	40.962	0	0	0	0	0	0	0	0	3205200	0	0	0	0	3629500	0	0	0	0	0	0
AT1G27130.1	AT1G27130.1	glutathione S-transferase tau 13	0.496448	S	14	0	1.63299e-05	85.845	48.369	74.76	0	0	0	0	0	0	0	0	0	0	0	0	0	0	0	0	0	0	0	0
AT1G27130.1	AT1G27130.1	glutathione S-transferase tau 13	0.946591	S	15	14.0816	7.32412e-18	143.42	96.832	143.42	412920	570100	402350	813680	0	0	883280	675150	0	0	0	5096800	954780	0	0	9068400	758690	0	254830	0
AT1G27190.1	AT1G27190.1	Leucine-rich repeat protein kinase family protein	0.999999	S	586	59.3983	2.32738e-07	126.63	115.78	126.63	4668000	0	2348400	0	0	0	0	3624300	5616000	3827600	0	9048200	9900200	4766800	4204300	0	0	8855900	0	9762700
AT1G27210.1	AT1G27210.1	ARM repeat superfamily protein	0.855464	S	314	7.84764	2.87037e-17	116.35	92.157	89.466	6723700	6779500	0	9406500	0	7811500	7245600	4318300	0	0	4640600	5652000	0	5344800	0	0	0	5637400	4430400	1562400
AT1G27300.1	AT1G27300.1	unknown protein; Has 54 Blast hits to 54 proteins in 19 species: Archae - 0; Bacteria - 0; Metazoa - 11; Fungi - 6; Plants - 34; Viruses - 0; Other Eukaryotes - 3 (source: NCBI BLink).	0.47015	S	74	0	4.96097e-09	112.13	91.315	98.299	0	0	0	0	0	0	0	0	0	0	0	0	0	0	0	0	0	0	0	0
AT1G27300.1	AT1G27300.1	unknown protein; Has 54 Blast hits to 54 proteins in 19 species: Archae - 0; Bacteria - 0; Metazoa - 11; Fungi - 6; Plants - 34; Viruses - 0; Other Eukaryotes - 3 (source: NCBI BLink).	0.580241	S	75	2.87731	9.60445e-10	113.35	97.844	113.35	0	0	0	0	10311000	0	0	3900500	4435900	0	4327000	10953000	4897700	0	0	3083500	1275600	4914000	1288400	5633700
AT1G27300.1	AT1G27300.1	unknown protein; Has 54 Blast hits to 54 proteins in 19 species: Archae - 0; Bacteria - 0; Metazoa - 11; Fungi - 6; Plants - 34; Viruses - 0; Other Eukaryotes - 3 (source: NCBI BLink).	0.364416	S	77	0	4.96097e-09	112.13	91.315	112.13	0	0	0	0	0	0	0	0	0	0	0	0	0	0	0	0	0	0	0	0
AT1G27390.1	AT1G27390.1	translocase outer membrane 20-2	0.91515	S	4	10.3284	2.20523e-11	123.8	89.934	123.8	6672100	5110000	5804100	10370000	5769400	7592700	4857500	4173400	6464100	320340	0	8908500	6569700	6271700	4102000	8106300	2392800	7981900	1494300	4636100
AT1G27390.1	AT1G27390.1	translocase outer membrane 20-2	0.623185	T	5	2.18489	1.18902e-05	89.548	65.205	89.548	0	0	0	0	0	0	0	0	0	3499800	3265600	0	0	0	0	0	0	0	0	0
AT1G27430.1	AT1G27430.1	GYF domain-containing protein	0.995453	S	426	23.4031	8.2498e-79	216.94	176.32	180.83	19011000	31700000	17114000	44363000	24914000	33292000	26758000	16227000	19153000	23375000	16157000	32551000	27714000	29402000	17247000	20698000	6054600	20126000	8495200	23352000
AT1G27540.1	AT1G27540.1	Protein of unknown function (DUF295)	0.333333	S	10	0	7.7816e-05	72.771	64.584	72.771	0	0	0	0	0	0	0	0	0	0	0	0	0	0	0	0	0	0	0	0
AT1G27540.1	AT1G27540.1	Protein of unknown function (DUF295)	0.333333	S	11	0	7.7816e-05	72.771	64.584	72.771	0	0	0	0	0	0	0	0	0	0	0	0	0	0	0	0	0	0	0	0
AT1G27540.1	AT1G27540.1	Protein of unknown function (DUF295) ; Protein of unknown function (DUF295)	0.558207	S	40	1.18923	3.16414e-18	150.11	119.55	136.33	41651000	0	0	0	0	0	0	0	0	0	0	0	43903000	0	0	0	0	0	0	39404000
AT1G27540.1	AT1G27540.1	Protein of unknown function (DUF295) ; Protein of unknown function (DUF295)	0.902897	S	41	9.97608	4.95764e-32	172.85	142.29	172.85	0	24199000	27355000	63406000	0	48048000	34770000	22398000	27441000	25094000	27889000	0	0	35879000	35243000	41394000	15232000	49389000	0	0
AT1G27540.1	AT1G27540.1	Protein of unknown function (DUF295)	0.333333	T	9	0	7.7816e-05	72.771	64.584	72.771	0	0	0	0	0	0	0	0	0	0	0	0	0	0	0	0	0	0	0	0
AT1G27540.1	AT1G27540.1	Protein of unknown function (DUF295) ; Protein of unknown function (DUF295)	0.48723	T	39	2.78841	1.5044e-12	128.76	94.981	128.76	0	0	0	0	0	0	0	0	0	0	0	0	0	0	0	0	0	0	0	0
AT1G27595.1	AT1G27595.1	CONTAINS InterPro DOMAIN/s: Symplekin tight junction protein C-terminal (InterPro:IPR022075); BEST Arabidopsis thaliana protein match is: HEAT repeat-containing protein (TAIR:AT5G01400.1); Has 593 Blast hits to 297 proteins in 111 species: Archae - 0; Bac	0.356039	S	269	0.326134	0.00489124	50.752	37.678	50.752	0	0	0	0	0	0	0	0	0	0	0	0	0	0	0	0	0	0	0	0
AT1G27595.1	AT1G27595.1	CONTAINS InterPro DOMAIN/s: Symplekin tight junction protein C-terminal (InterPro:IPR022075); BEST Arabidopsis thaliana protein match is: HEAT repeat-containing protein (TAIR:AT5G01400.1); Has 593 Blast hits to 297 proteins in 111 species: Archae - 0; Bac	0.999832	S	276	38.9564	1.22649e-11	125.35	112.03	77.681	5334100	0	4245100	0	4879800	5519400	4384800	2542000	1827200	2088600	1757400	3922600	6596000	4345300	0	2905700	0	2258000	747820	1230300
AT1G27595.1	AT1G27595.1	CONTAINS InterPro DOMAIN/s: Symplekin tight junction protein C-terminal (InterPro:IPR022075); BEST Arabidopsis thaliana protein match is: HEAT repeat-containing protein (TAIR:AT5G01400.1); Has 593 Blast hits to 297 proteins in 111 species: Archae - 0; Bac	0.704124	T	287	3.76615	4.32488e-05	86.856	72.622	86.856	6744800	6114800	0	0	0	0	0	0	0	0	0	0	6402300	0	0	0	0	0	0	0
AT1G27600.2	AT1G27600.2	Nucleotide-diphospho-sugar transferases superfamily protein ; Nucleotide-diphospho-sugar transferases superfamily protein	0.999987	S	9	49.6987	1.02714e-06	93.096	68.241	90.05	27828000	19001000	15470000	26035000	19104000	24726000	22913000	9109600	14746000	15520000	12162000	25510000	31085000	26068000	11713000	25451000	7292400	26187000	10016000	17376000
AT1G27700.1	AT1G27700.1	Syntaxin/t-SNARE family protein	0.997198	S	188	25.5135	4.99473e-13	141.86	114.65	141.86	0	0	369830	2183100	0	2104100	0	0	710070	865300	0	0	3005900	1899000	1084300	6242600	362050	1992400	162690	1157500
AT1G27850.1	AT1G27850.1	unknown protein; FUNCTIONS IN: molecular_function unknown; INVOLVED IN: biological_process unknown; LOCATED IN: plasma membrane; EXPRESSED IN: 22 plant structures; EXPRESSED DURING: 13 growth stages; BEST Arabidopsis thaliana protein match is: unknown pro	0.999992	S	25	50.7727	0.000113636	76.332	58.512	76.332	1213500	0	0	0	2766700	2135700	0	373770	1173300	0	1601200	2954000	2394900	1317200	1122000	6611300	0	2049600	0	0
AT1G27850.1	AT1G27850.1	unknown protein; FUNCTIONS IN: molecular_function unknown; INVOLVED IN: biological_process unknown; LOCATED IN: plasma membrane; EXPRESSED IN: 22 plant structures; EXPRESSED DURING: 13 growth stages; BEST Arabidopsis thaliana protein match is: unknown pro	0.67483	S	906	6.19212	0.00209953	53.998	44.901	53.998	3098800	2247800	2875600	0	4591500	3625500	3611300	1557100	2274800	0	2417100	3323200	5457700	3356100	0	0	235030	1661600	1060900	0
AT1G28280.2	AT1G28280.2	VQ motif-containing protein ; VQ motif-containing protein	0.70208	S	152	3.72287	2.89393e-09	131.51	107.71	131.51	0	681380	1727900	3943400	2720700	2457200	1822000	826380	0	609480	1039600	0	0	1559800	1280000	4960400	186180	0	86426	1135700
AT1G28280.2	AT1G28280.2	VQ motif-containing protein ; VQ motif-containing protein	0.883154	S	155	8.78422	3.87295e-09	128.26	107.01	54.7	0	681380	1727900	0	2720700	0	1822000	826380	0	609480	1039600	1945300	2704400	1559800	1280000	0	0	2671300	0	1135700
AT1G28280.2	AT1G28280.2	VQ motif-containing protein ; VQ motif-containing protein	0.824289	S	235	6.71281	1.07864e-06	101.35	89.123	88.338	2935600	2254900	3637800	6914600	6184100	7324400	4432500	2458500	2011400	1417800	2127100	4990400	4857900	3456200	3658500	11428000	1359500	6499700	779820	3549100
AT1G28280.2	AT1G28280.2	VQ motif-containing protein ; VQ motif-containing protein	0.481462	S	191	0.517528	6.12416e-05	101.2	66.506	101.2	0	0	0	0	0	0	0	0	0	0	0	0	0	0	0	0	0	0	0	0
AT1G28280.2	AT1G28280.2	VQ motif-containing protein ; VQ motif-containing protein	0.998639	S	194	29.5327	3.19889e-06	119	76.255	119	9171000	5036000	7459500	11345000	10522000	10063000	6961600	4760500	6982600	6038000	4442100	9355800	8322500	6555600	6542700	7559800	2281600	8874700	2133300	0
AT1G28280.2	AT1G28280.2	VQ motif-containing protein ; VQ motif-containing protein	0.5	T	234	0	1.07864e-06	101.35	89.123	81.625	2935600	2254900	3637800	0	6184100	7324400	0	2458500	2011400	1417800	2127100	4990400	4857900	3456200	0	11428000	1359500	6499700	779820	3549100
AT1G29025.1	AT1G29025.1	Calcium-binding EF-hand family protein	0.814564	S	187	6.4273	1.05152e-27	178.14	153.79	178.14	0	0	0	0	0	0	25697000	0	0	0	0	0	0	32805000	0	19038000	0	0	6969000	0
AT1G29025.1	AT1G29025.1	Calcium-binding EF-hand family protein	0.964748	S	188	14.3723	7.55019e-78	235.22	219.47	235.22	30340000	10135000	20213000	19327000	27999000	22253000	12689000	14495000	10935000	7240600	8361500	18489000	31379000	19160000	7850000	12384000	2747400	11064000	5948400	7739600
AT1G29025.1	AT1G29025.1	Calcium-binding EF-hand family protein	0.332053	T	183	0	0.0154106	42.382	37.064	42.382	0	0	0	0	0	0	0	0	0	0	0	0	0	0	0	0	0	0	0	0
AT1G29220.1	AT1G29220.1	transcriptional regulator family protein ; transcriptional regulator family protein	0.41611	S	81	1.76979	4.43356e-05	104.95	77.273	75.911	0	0	0	0	0	0	0	0	0	0	0	0	0	0	0	0	0	0	0	0
AT1G29220.1	AT1G29220.1	transcriptional regulator family protein ; transcriptional regulator family protein	0.59376	S	82	2.09316	0.000135221	88.282	59.306	88.282	0	0	0	0	0	0	0	0	0	8353500	0	0	0	0	7753500	0	0	0	0	0
AT1G29220.1	AT1G29220.1	transcriptional regulator family protein ; transcriptional regulator family protein	0.746093	S	83	4.7078	4.7963e-08	131.94	102.96	110.61	0	9462600	6336200	15697000	12582000	15135000	9484600	5044000	0	0	5961400	12561000	0	10233000	0	11007000	2298300	10126000	3303100	7301000
AT1G29220.1	AT1G29220.1	transcriptional regulator family protein ; transcriptional regulator family protein	0.998782	T	87	28.5493	4.7963e-08	131.94	102.96	88.282	0	9462600	6336200	15697000	12582000	15135000	9484600	5044000	0	8353500	5961400	12561000	0	10233000	7753500	11007000	2298300	10126000	3303100	7301000
AT1G29280.1	AT1G29280.1	WRKY DNA-binding protein 65	0.429033	S	38	0.946056	0.00761022	43.282	6.9482	43.282	0	0	0	0	0	0	0	0	0	0	0	0	0	0	0	0	0	0	0	0
AT1G29280.1	AT1G29280.1	WRKY DNA-binding protein 65	0.618297	S	39	2.35382	0.00050279	64.82	28.486	64.82	0	0	0	0	0	7162000	7002200	0	0	0	0	0	0	0	0	0	0	0	0	0
AT1G29280.1	AT1G29280.1	WRKY DNA-binding protein 65	0.996788	S	41	25.0266	8.56236e-14	103.08	54.66	83.397	10134000	0	0	11059000	0	0	0	0	0	4964500	0	8294500	0	10230000	0	0	0	10436000	0	13281000
AT1G29370.1	AT1G29370.1	Kinase-related protein of unknown function (DUF1296) ; Kinase-related protein of unknown function (DUF1296)	0.808133	S	289	6.44717	0.00104183	60.032	47.23	60.032	7549400	4465600	3181800	0	0	0	0	3379400	4500200	4139000	2729300	0	6118200	3442500	4574300	5854600	0	5327400	0	4001100
AT1G29370.1	AT1G29370.1	Kinase-related protein of unknown function (DUF1296) ; Kinase-related protein of unknown function (DUF1296)	0.989558	S	531	21.1972	3.6023e-05	96.135	84.159	90.385	2069000	0	2110800	2735600	1331400	1183300	1136000	857140	1878800	2756500	0	4330300	4249600	2780300	2177500	3252900	0	4586000	0	0
AT1G29370.1	AT1G29370.1	Kinase-related protein of unknown function (DUF1296)	1	S	267	71.7327	2.83587e-08	130.01	111.17	130.01	10361000	7844600	8240000	10615000	8614000	14825000	6021100	5895500	7156700	6009200	5519000	12485000	9890200	10442000	5010900	5459500	2995200	7765600	2938200	7365200
AT1G29370.1	AT1G29370.1	Kinase-related protein of unknown function (DUF1296) ; Kinase-related protein of unknown function (DUF1296)	0.316069	S	245	0	0.000140513	76.85	55.757	76.85	0	0	0	0	0	0	0	0	0	0	0	0	0	0	0	0	0	0	0	0
AT1G29370.1	AT1G29370.1	Kinase-related protein of unknown function (DUF1296) ; Kinase-related protein of unknown function (DUF1296)	0.963762	S	247	16.7751	4.31917e-21	167.05	137.71	167.05	9894900	14786000	16943000	35684000	26841000	19163000	28632000	0	6949900	15602000	8842400	26157000	27311000	23359000	12263000	29991000	4937300	10961000	5800800	18664000
AT1G29370.1	AT1G29370.1	Kinase-related protein of unknown function (DUF1296) ; Kinase-related protein of unknown function (DUF1296)	0.547887	S	248	1.31919	3.28131e-20	157.11	138.37	157.11	0	0	0	0	0	0	0	0	0	0	0	0	0	0	0	0	0	12322000	0	0
AT1G29370.1	AT1G29370.1	Kinase-related protein of unknown function (DUF1296) ; Kinase-related protein of unknown function (DUF1296)	0.99962	S	250	33.8983	2.5802e-28	176.11	159.81	128.74	5819800	12157000	12811000	29477000	24309000	16809000	16163000	8494500	6715500	7482400	4285700	28008000	23995000	24994000	7536500	18494000	4196800	24087000	4573400	14496000
AT1G29370.1	AT1G29370.1	Kinase-related protein of unknown function (DUF1296) ; Kinase-related protein of unknown function (DUF1296)	0.671461	S	397	4.0562	2.6437e-07	107.45	78.112	51.851	7184200	3377400	0	5067300	3149500	5116500	5220600	2978700	6753500	5622900	0	5692400	7755000	4078300	3306800	4281600	1034100	4655500	1158100	2958900
AT1G29370.1	AT1G29370.1	Kinase-related protein of unknown function (DUF1296) ; Kinase-related protein of unknown function (DUF1296)	0.697631	S	108	5.96496	0.000127155	81.428	70.676	81.428	6159200	7788100	0	0	0	0	0	0	0	0	0	10220000	0	0	0	0	2629300	0	3183700	4039300
AT1G29370.1	AT1G29370.1	Kinase-related protein of unknown function (DUF1296) ; Kinase-related protein of unknown function (DUF1296)	0.316069	T	246	0	0.000140513	76.85	55.757	76.85	0	0	0	0	0	0	0	0	0	0	0	0	0	0	0	0	0	0	0	0
AT1G29370.1	AT1G29370.1	Kinase-related protein of unknown function (DUF1296) ; Kinase-related protein of unknown function (DUF1296)	0.499901	T	396	0	2.6437e-07	107.45	78.112	107.45	7184200	3377400	0	5067300	3149500	5116500	5220600	2978700	6753500	5622900	0	5692400	7755000	4078300	3306800	4281600	1034100	4655500	1158100	2958900
AT1G29400.2	AT1G29400.2	MEI2-like protein 5 ; MEI2-like protein 5	0.99999	S	53	50.3749	0.000595009	66.004	50.843	66.004	0	0	279130	0	0	628770	206340	0	453050	86074	0	335050	387710	345450	0	2006400	0	487510	112340	231220
AT1G29400.2	AT1G29400.2	MEI2-like protein 5 ; MEI2-like protein 5	0.330826	S	32	0	0.0145018	40.085	31.59	40.085	0	0	0	0	0	0	0	0	0	0	0	0	0	0	0	0	0	0	0	0
AT1G29400.2	AT1G29400.2	MEI2-like protein 5 ; MEI2-like protein 5	0.656772	S	33	3.03969	2.38213e-07	102.48	93.831	102.48	0	0	0	0	6405000	0	0	0	0	0	0	0	0	0	0	0	0	0	0	0
AT1G29400.2	AT1G29400.2	MEI2-like protein 5 ; MEI2-like protein 5	0.805471	S	34	6.49226	2.04109e-07	104.18	79.286	104.18	1503900	208020	3876800	2294200	4545300	2895700	253270	0	0	0	1478300	0	4797100	621320	437110	0	0	0	86716	173480
AT1G29400.2	AT1G29400.2	MEI2-like protein 5 ; MEI2-like protein 5	0.927653	S	789	11.0797	2.7535e-06	121.82	106.94	121.82	0	19961000	0	18119000	13932000	20379000	0	10378000	0	13338000	9752600	0	0	12388000	10796000	20533000	0	17078000	0	12745000
AT1G29400.2	AT1G29400.2	MEI2-like protein 5 ; MEI2-like protein 5	0.993063	S	792	22.9404	7.06813e-20	166.6	133.3	112.45	6940500	11409000	5448000	24422000	12148000	0	12854000	3714900	2889500	5880000	8627900	8372300	7314000	0	8754000	9280500	0	12018000	4625300	7815600
AT1G29400.2	AT1G29400.2	MEI2-like protein 5 ; MEI2-like protein 5	0.385245	S	800	0.980657	0.00131634	62.684	53.278	62.684	0	0	0	0	0	0	0	0	0	0	0	0	0	0	0	0	0	0	0	0
AT1G29400.2	AT1G29400.2	MEI2-like protein 5 ; MEI2-like protein 5	0.999674	S	522	34.8883	2.36131e-05	96.016	77.721	86.357	11022000	5735000	4417500	71805000	22982000	10527000	12658000	9883000	13978000	14452000	10692000	22231000	27341000	9965000	0	0	0	0	0	0
AT1G30000.1	AT1G30000.1	alpha-mannosidase 3	0.88516	S	29	8.95732	0.00093145	62.924	40.45	62.924	233650	0	210420	0	0	0	515960	136480	0	0	325960	380580	0	360820	266890	1752200	221910	0	0	392480
AT1G30230.1	AT1G30230.1	Glutathione S-transferase, C-terminal-like;Translation elongation factor EF1B/ribosomal protein S6 ; Glutathione S-transferase, C-terminal-like;Translation elongation factor EF1B/ribosomal protein S6	1	T	117	85.1905	1.53885e-07	85.19	77.198	85.19	0	0	0	0	0	0	0	0	0	0	0	0	0	0	0	0	0	0	0	0
AT1G30230.1	AT1G30230.1	Glutathione S-transferase, C-terminal-like;Translation elongation factor EF1B/ribosomal protein S6 ; Glutathione S-transferase, C-terminal-like;Translation elongation factor EF1B/ribosomal protein S6	0.999716	T	91	35.9906	4.89676e-52	178.51	172.67	144.08	8832200	24166000	12534000	27713000	27686000	28993000	45995000	8330400	16527000	16416000	15725000	27496000	26733000	24044000	11180000	34379000	0	15118000	0	11981000
AT1G30240.1	AT1G30240.1	FUNCTIONS IN: binding; INVOLVED IN: biological_process unknown; LOCATED IN: cellular_component unknown; EXPRESSED IN: 21 plant structures; EXPRESSED DURING: 13 growth stages; CONTAINS InterPro DOMAIN/s: Armadillo-type fold (InterPro:IPR016024); Has 165 Bl	0.943884	S	769	12.2609	2.62358e-05	85.636	70.243	65.295	0	2871100	3118500	7582200	4753600	6224100	3188300	0	2065900	0	1797600	1724700	3786000	2853600	0	3168100	0	2924400	0	2129400
AT1G30240.1	AT1G30240.1	FUNCTIONS IN: binding; INVOLVED IN: biological_process unknown; LOCATED IN: cellular_component unknown; EXPRESSED IN: 21 plant structures; EXPRESSED DURING: 13 growth stages; CONTAINS InterPro DOMAIN/s: Armadillo-type fold (InterPro:IPR016024); Has 165 Bl	0.99996	S	748	44.0178	1.44709e-10	119.25	85.001	100.22	0	0	7801400	0	0	0	0	0	0	0	0	0	0	8612500	7862800	0	0	0	0	0
AT1G30440.1	AT1G30440.1	Phototropic-responsive NPH3 family protein	0.298276	S	274	0	0.00600972	41.087	32.998	41.087	0	0	0	0	0	0	0	0	0	0	0	0	0	0	0	0	0	0	0	0
AT1G30440.1	AT1G30440.1	Phototropic-responsive NPH3 family protein	0.999996	S	279	55.5544	3.28061e-48	199.08	185.27	182.18	12604000	6531700	8187300	13845000	9299500	11383000	7057800	6204600	10360000	8228100	5488300	11016000	11010000	9915500	8613700	14031000	4473100	16724000	0	11801000
AT1G30440.1	AT1G30440.1	Phototropic-responsive NPH3 family protein	0.954279	S	631	14.6108	0.000974038	60.401	49.139	60.401	1932200	0	440630	0	1510000	2053700	1397800	971290	0	0	869880	2297800	4634400	2253300	0	1601400	0	0	523790	0
AT1G30440.1	AT1G30440.1	Phototropic-responsive NPH3 family protein	0.298276	T	275	0	0.00600972	41.087	32.998	41.087	0	0	0	0	0	0	0	0	0	0	0	0	0	0	0	0	0	0	0	0
AT1G30450.3	AT1G30450.3	cation-chloride co-transporter 1 ; cation-chloride co-transporter 1 ; cation-chloride co-transporter 1	0.867709	S	110	8.16843	3.76812e-78	236.4	214.94	211.7	0	0	0	17411000	0	0	22435000	0	26531000	0	10218000	0	0	0	0	0	0	0	0	0
AT1G30450.3	AT1G30450.3	cation-chloride co-transporter 1 ; cation-chloride co-transporter 1 ; cation-chloride co-transporter 1	0.949859	S	111	12.8229	8.28428e-154	287.54	261.01	186.05	27423000	14561000	17485000	17411000	13983000	28275000	0	16413000	0	15305000	0	34167000	35866000	18841000	12373000	36788000	7331800	24661000	6839500	16584000
AT1G30470.3	AT1G30470.3	SIT4 phosphatase-associated family protein ; SIT4 phosphatase-associated family protein ; SIT4 phosphatase-associated family protein	0.374349	Y	467	0	5.16356e-12	109.97	97.656	109.97	0	0	0	0	0	0	0	0	0	0	0	0	0	0	0	0	0	0	0	0
AT1G30470.3	AT1G30470.3	SIT4 phosphatase-associated family protein ; SIT4 phosphatase-associated family protein ; SIT4 phosphatase-associated family protein	0.374349	Y	472	0	5.16356e-12	109.97	97.656	109.97	0	0	0	0	0	0	0	0	0	0	0	0	0	0	0	0	0	0	0	0
AT1G30470.3	AT1G30470.3	SIT4 phosphatase-associated family protein ; SIT4 phosphatase-associated family protein ; SIT4 phosphatase-associated family protein	0.65212	S	703	3.1507	1.95486e-07	103.46	73.114	84.954	0	12307000	10212000	12977000	0	11971000	0	0	0	0	0	10467000	0	0	0	0	0	0	11681000	0
AT1G30470.3	AT1G30470.3	SIT4 phosphatase-associated family protein ; SIT4 phosphatase-associated family protein ; SIT4 phosphatase-associated family protein	0.484901	S	704	0	3.41454e-06	96.82	66.472	93.766	0	0	0	0	0	0	0	0	0	0	0	0	0	0	0	0	0	0	0	0
AT1G30470.3	AT1G30470.3	SIT4 phosphatase-associated family protein ; SIT4 phosphatase-associated family protein ; SIT4 phosphatase-associated family protein	0.997262	S	692	25.613	9.4081e-93	242.48	194.44	227.63	39675000	39847000	33201000	0	0	54884000	57659000	24737000	33545000	30415000	22555000	45124000	42082000	43549000	26354000	52135000	12718000	49883000	18281000	32564000
AT1G30470.3	AT1G30470.3	SIT4 phosphatase-associated family protein ; SIT4 phosphatase-associated family protein ; SIT4 phosphatase-associated family protein	0.518538	S	459	2.553	2.29038e-20	128.6	122.02	128.6	0	0	0	0	0	0	12913000	0	0	0	0	0	0	0	0	0	0	0	0	0
AT1G30470.3	AT1G30470.3	SIT4 phosphatase-associated family protein ; SIT4 phosphatase-associated family protein ; SIT4 phosphatase-associated family protein	0.94475	S	462	12.3304	5.1863e-66	201.75	182.86	86.936	213800	0	0	36558000	26085000	12271000	498250	0	0	3487200	0	713170	16824000	6368800	7031200	25939000	0	1283300	426230	0
AT1G30470.3	AT1G30470.3	SIT4 phosphatase-associated family protein ; SIT4 phosphatase-associated family protein ; SIT4 phosphatase-associated family protein	0.548267	T	701	2.74192	2.70547e-05	86.911	57.494	86.911	0	0	0	0	0	0	0	0	0	0	0	0	0	0	0	0	5018500	0	0	0
AT1G30480.1	AT1G30480.1	D111/G-patch domain-containing protein	0.872835	S	187	6.41125	0.000347751	72.433	53.702	72.433	4584700	0	0	0	5452300	5906900	4502700	0	3704600	1935800	2185400	0	4775600	0	4964100	4204500	0	0	0	0
AT1G30480.1	AT1G30480.1	D111/G-patch domain-containing protein	0.683697	S	188	2.45388	0.000347751	72.433	53.702	72.433	4584700	0	0	0	5452300	5906900	4502700	0	3704600	1935800	2185400	0	4775600	0	4964100	4204500	0	0	0	0
AT1G30480.1	AT1G30480.1	D111/G-patch domain-containing protein	0.9928	S	189	24.1959	4.29572e-09	134.02	122.75	112.96	17014000	15311000	17914000	24691000	19926000	24604000	16474000	10689000	13082000	13383000	11642000	19793000	18333000	13145000	16207000	18322000	6733800	2359100	6121700	16818000
AT1G30620.3	AT1G30620.3	NAD(P)-binding Rossmann-fold superfamily protein ; NAD(P)-binding Rossmann-fold superfamily protein ; NAD(P)-binding Rossmann-fold superfamily protein	0.993586	S	18	21.9013	3.23407e-06	94.023	73.166	86.944	4305500	3682300	2900100	0	4087000	4467100	3390400	1795200	3826900	2486400	2835100	4270000	3867800	5574400	2986600	3851200	1127800	5775500	0	0
AT1G30630.1	AT1G30630.1	Coatomer epsilon subunit	1	S	279	46.797	0.000791348	63.727	49.469	46.797	20877000	16279000	11909000	0	15908000	14335000	16178000	7381700	11895000	14878000	10406000	19048000	18440000	15204000	13136000	18979000	5660400	20143000	0	0
AT1G30640.1	AT1G30640.1	Protein kinase family protein	0.498714	S	322	0	6.63301e-06	94.569	85.036	94.569	0	0	0	0	0	0	0	0	0	0	0	0	0	0	0	0	0	0	0	0
AT1G30640.1	AT1G30640.1	Protein kinase family protein	0.498714	T	323	0	6.63301e-06	94.569	85.036	94.569	0	0	0	0	0	0	0	0	0	0	0	0	0	0	0	0	0	0	0	0
AT1G30690.2	AT1G30690.2	Sec14p-like phosphatidylinositol transfer family protein ; Sec14p-like phosphatidylinositol transfer family protein	0.539233	S	51	0.685511	0.000469494	82.908	67.142	55.186	516120	499530	314080	2752900	623980	564670	1298900	131170	483350	363020	606550	988500	544470	673140	0	2938100	324670	0	0	375570
AT1G30690.2	AT1G30690.2	Sec14p-like phosphatidylinositol transfer family protein ; Sec14p-like phosphatidylinositol transfer family protein	0.999941	S	53	42.3223	7.72282e-76	230.48	207.87	230.48	20158000	9510900	10941000	46520000	33918000	23262000	30336000	13701000	25536000	28161000	28357000	46343000	41388000	34487000	11701000	28500000	5185800	8525700	1996200	5704500
AT1G30690.2	AT1G30690.2	Sec14p-like phosphatidylinositol transfer family protein ; Sec14p-like phosphatidylinositol transfer family protein	0.999994	S	131	51.9517	6.79301e-05	95.957	74.126	95.957	8874000	6591800	4666300	7409300	6943000	8422800	6268600	3232700	0	4406000	0	8778200	7178500	7067600	3376100	5587500	1805100	4621000	1996000	4684700
AT1G30810.2	AT1G30810.2	Transcription factor jumonji (jmj) family protein / zinc finger (C5HC2 type) family protein ; Transcription factor jumonji (jmj) family protein / zinc finger (C5HC2 type) family protein	0.878371	S	35	8.58641	2.1272e-22	149.49	128.03	149.49	9245600	0	7028600	12057000	5368800	12929000	5294600	5560800	0	4598200	3464300	0	0	7450700	0	0	0	0	3192700	10333000
AT1G30810.2	AT1G30810.2	Transcription factor jumonji (jmj) family protein / zinc finger (C5HC2 type) family protein ; Transcription factor jumonji (jmj) family protein / zinc finger (C5HC2 type) family protein	0.921278	S	36	10.6829	4.59145e-22	143.31	121.85	127.52	0	6682000	0	0	0	0	5294600	0	6953900	0	3464300	10318000	11851000	0	5838500	7386500	2962300	10035000	3192700	0
AT1G30880.1	AT1G30880.1	unknown protein; Has 24 Blast hits to 24 proteins in 8 species: Archae - 0; Bacteria - 0; Metazoa - 2; Fungi - 0; Plants - 22; Viruses - 0; Other Eukaryotes - 0 (source: NCBI BLink).	0.983617	S	78	21.8379	5.86828e-21	104.51	90.557	49.968	14092000	15154000	15527000	33382000	21151000	29589000	14456000	6210600	0	0	3172200	22452000	15701000	15695000	11592000	12408000	0	13439000	1758800	9478300
AT1G30960.1	AT1G30960.1	GTP-binding family protein	1	S	136	66.0119	9.94372e-07	88.001	81.202	66.012	3905500	2326300	3107600	6383900	4988100	3735100	0	0	2932600	1551900	2284500	5357400	4144800	4131600	0	0	0	0	0	0
AT1G31070.1	AT1G31070.1	N-acetylglucosamine-1-phosphate uridylyltransferase 1 ; N-acetylglucosamine-1-phosphate uridylyltransferase 1	0.657776	S	25	4.18719	0.000748436	53.091	39.361	44.615	6342100	0	0	5765200	0	0	0	0	0	7498400	3648800	0	0	13996000	5838400	0	0	0	1986800	0
AT1G31070.1	AT1G31070.1	N-acetylglucosamine-1-phosphate uridylyltransferase 1 ; N-acetylglucosamine-1-phosphate uridylyltransferase 1	0.689113	T	14	9.46301	3.11809e-05	69.492	59.373	69.492	0	0	0	4991100	4186800	8734200	9912600	0	0	0	0	0	1586900	0	7347700	0	1591400	0	1344600	0
AT1G31440.1	AT1G31440.1	SH3 domain-containing protein	0.742757	S	263	4.60504	2.14147e-19	159.08	145.18	111.62	0	6417000	0	0	0	0	0	3981800	0	7117300	3588900	11492000	5098500	5559300	0	8452800	2780700	9468800	0	7217200
AT1G31440.1	AT1G31440.1	SH3 domain-containing protein	0.981262	S	264	17.1906	8.29368e-111	255.2	231.82	255.2	13645000	14099000	11992000	21679000	20865000	22696000	18073000	7810900	13518000	13242000	9376600	19596000	16222000	13889000	2307900	11619000	0	17227000	4649300	10901000
AT1G31440.1	AT1G31440.1	SH3 domain-containing protein	0.666431	S	285	0	0.00149002	47.104	26.905	42.384	2096600	2495800	0	0	0	4669800	0	0	0	0	0	3319200	2951600	2770300	3800500	5565300	0	3824700	0	1935700
AT1G31440.1	AT1G31440.1	SH3 domain-containing protein	0.666423	S	287	0	2.81776e-07	92.238	70.356	42.384	2096600	2495800	0	0	0	4669800	0	0	0	0	0	3319200	2951600	2770300	3800500	5565300	0	3824700	0	1935700
AT1G31440.1	AT1G31440.1	SH3 domain-containing protein	0.66642	S	288	0	2.81776e-07	92.238	70.356	42.384	2096600	2495800	0	0	0	4669800	0	0	0	0	0	3319200	2951600	2770300	3800500	5565300	0	11413000	0	8916300
AT1G31460.1	AT1G31460.1	unknown protein; FUNCTIONS IN: molecular_function unknown; INVOLVED IN: biological_process unknown; LOCATED IN: plasma membrane; EXPRESSED IN: 23 plant structures; EXPRESSED DURING: 13 growth stages; BEST Arabidopsis thaliana protein match is: unknown pro	0.999437	S	234	37.1428	0.0144439	42.083	16.189	42.083	0	0	5930900	0	0	0	0	2130200	0	0	0	0	3950000	4412600	3413600	0	1215100	4084900	976320	2327400
AT1G31460.1	AT1G31460.1	unknown protein; FUNCTIONS IN: molecular_function unknown; INVOLVED IN: biological_process unknown; LOCATED IN: plasma membrane; EXPRESSED IN: 23 plant structures; EXPRESSED DURING: 13 growth stages; BEST Arabidopsis thaliana protein match is: unknown pro	0.854036	S	106	12.5341	0.00654469	61.641	41.178	54.501	5145200	5502200	6042500	6816800	5492800	8330900	6354900	3343700	5830900	5105900	2279200	5127600	6075900	0	4708400	4799200	0	3581700	0	0
AT1G31730.1	AT1G31730.1	Adaptin family protein	0.24976	S	788	0	0.0247293	49.482	25.19	49.482	0	0	0	0	0	0	0	0	0	0	0	0	0	0	0	0	0	0	0	0
AT1G31730.1	AT1G31730.1	Adaptin family protein	0.24976	S	789	0	0.0247293	49.482	25.19	49.482	0	0	0	0	0	0	0	0	0	0	0	0	0	0	0	0	0	0	0	0
AT1G31730.1	AT1G31730.1	Adaptin family protein	0.24976	S	790	0	0.0247293	49.482	25.19	49.482	0	0	0	0	0	0	0	0	0	0	0	0	0	0	0	0	0	0	0	0
AT1G31810.1	AT1G31810.1	Formin Homology 14	1	S	343	40.0246	1.8662e-06	121.31	106.62	40.025	2617400	3261300	2533600	3801800	3510200	4573300	3524100	2056300	2550800	3269700	1937700	2997700	3644900	2494300	2750400	3420100	718100	2307100	992380	2287000
AT1G31812.1	AT1G31812.1	acyl-CoA-binding protein 6	0.431534	S	88	1.81341	0.00025533	76.073	56.286	55.261	0	0	0	0	0	0	0	0	0	0	0	0	0	0	0	0	0	0	0	0
AT1G31812.1	AT1G31812.1	acyl-CoA-binding protein 6	0.333333	S	91	0	0.00025533	76.073	56.286	76.073	0	0	0	0	0	0	0	0	0	0	0	0	0	0	0	0	0	0	0	0
AT1G31812.1	AT1G31812.1	acyl-CoA-binding protein 6	0.333333	T	92	0	0.00025533	76.073	56.286	76.073	0	0	0	0	0	0	0	0	0	0	0	0	0	0	0	0	0	0	0	0
AT1G31830.2	AT1G31830.2	Amino acid permease family protein	0.563763	S	21	1.11655	2.88349e-06	83.039	75.046	83.039	0	0	0	0	5194400	0	0	0	0	0	4004700	1914700	0	3234100	0	0	0	4718400	347910	0
AT1G31830.2	AT1G31830.2	Amino acid permease family protein	0.774792	S	22	5.44772	5.08333e-06	76.162	68.623	42.347	0	0	0	0	0	8080000	0	3927800	0	0	0	0	0	0	0	11989000	0	0	0	4426600
AT1G31870.2	AT1G31870.2	unknown protein; FUNCTIONS IN: molecular_function unknown; INVOLVED IN: biological_process unknown; LOCATED IN: cytosol, nucleus; EXPRESSED IN: 25 plant structures; EXPRESSED DURING: 15 growth stages; CONTAINS InterPro DOMAIN/s: Protein of unknown functio	0.999993	S	244	51.7845	3.09447e-22	145.29	117.08	128.85	12234000	14320000	8926000	20970000	14363000	9635400	12035000	0	9484600	10511000	6062400	13285000	5238300	8380000	12958000	9875500	4758700	7263900	6548600	9707500
AT1G31870.2	AT1G31870.2	unknown protein; FUNCTIONS IN: molecular_function unknown; INVOLVED IN: biological_process unknown; LOCATED IN: cytosol, nucleus; EXPRESSED IN: 25 plant structures; EXPRESSED DURING: 15 growth stages; CONTAINS InterPro DOMAIN/s: Protein of unknown functio	0.719966	S	300	4.10196	0.00847622	47.915	39.066	47.915	0	0	0	0	0	0	0	0	0	0	7996800	0	0	0	0	0	0	0	0	0
AT1G31870.2	AT1G31870.2	unknown protein; FUNCTIONS IN: molecular_function unknown; INVOLVED IN: biological_process unknown; LOCATED IN: cytosol, nucleus; EXPRESSED IN: 25 plant structures; EXPRESSED DURING: 15 growth stages; CONTAINS InterPro DOMAIN/s: Protein of unknown functio	0.999997	S	303	55.5384	4.68292e-19	154.13	135.51	154.13	10828000	6106600	15334000	6717500	5923900	10637000	5623600	8826500	8926400	0	0	8445000	7060200	11800000	7952600	11017000	5484800	8994800	0	9800600
AT1G31870.2	AT1G31870.2	unknown protein; FUNCTIONS IN: molecular_function unknown; INVOLVED IN: biological_process unknown; LOCATED IN: cytosol, nucleus; EXPRESSED IN: 25 plant structures; EXPRESSED DURING: 15 growth stages; CONTAINS InterPro DOMAIN/s: Protein of unknown functio	0.610422	S	114	4.32728	5.60137e-14	138.2	113.07	138.2	0	0	0	0	0	0	0	0	0	0	0	0	0	0	0	27262000	0	0	0	0
AT1G31870.2	AT1G31870.2	unknown protein; FUNCTIONS IN: molecular_function unknown; INVOLVED IN: biological_process unknown; LOCATED IN: cytosol, nucleus; EXPRESSED IN: 25 plant structures; EXPRESSED DURING: 15 growth stages; CONTAINS InterPro DOMAIN/s: Protein of unknown functio	0.999816	S	117	38.1759	1.94254e-13	131.06	96.807	74.46	6594300	7264100	8367000	9029900	8365000	11894000	7704000	6545200	8282900	5626900	5268400	9506500	10456000	8635400	5823900	9988900	3316900	8252900	4208100	6552600
AT1G31870.2	AT1G31870.2	unknown protein; FUNCTIONS IN: molecular_function unknown; INVOLVED IN: biological_process unknown; LOCATED IN: cytosol, nucleus; EXPRESSED IN: 25 plant structures; EXPRESSED DURING: 15 growth stages; CONTAINS InterPro DOMAIN/s: Protein of unknown functio	0.91542	S	175	10.3751	6.08362e-15	141.38	91.174	66.498	10799000	0	13897000	20797000	0	0	0	0	0	6281100	3998000	9855500	0	0	0	0	2239500	0	0	0
AT1G31870.2	AT1G31870.2	unknown protein; FUNCTIONS IN: molecular_function unknown; INVOLVED IN: biological_process unknown; LOCATED IN: cytosol, nucleus; EXPRESSED IN: 25 plant structures; EXPRESSED DURING: 15 growth stages; CONTAINS InterPro DOMAIN/s: Protein of unknown functio	0.937456	S	178	11.7577	6.04593e-15	141.46	105.13	141.46	0	8559200	0	0	6452400	22864000	7719800	4467700	10688000	0	0	0	15286000	9828500	6295600	13079000	0	12137000	2317100	7243700
AT1G31870.2	AT1G31870.2	unknown protein; FUNCTIONS IN: molecular_function unknown; INVOLVED IN: biological_process unknown; LOCATED IN: cytosol, nucleus; EXPRESSED IN: 25 plant structures; EXPRESSED DURING: 15 growth stages; CONTAINS InterPro DOMAIN/s: Protein of unknown functio	0.677301	S	336	3.21984	8.36357e-16	129.34	81.059	111.94	40099000	22182000	24299000	47893000	24322000	31979000	0	27198000	39072000	23411000	18034000	31268000	26520000	21432000	32363000	34308000	12700000	42383000	16057000	45906000
AT1G31870.2	AT1G31870.2	unknown protein; FUNCTIONS IN: molecular_function unknown; INVOLVED IN: biological_process unknown; LOCATED IN: cytosol, nucleus; EXPRESSED IN: 25 plant structures; EXPRESSED DURING: 15 growth stages; CONTAINS InterPro DOMAIN/s: Protein of unknown functio	0.669286	S	337	3.06189	8.36357e-16	129.34	81.059	83.53	40099000	0	24299000	47893000	0	31979000	28641000	27198000	39072000	23411000	18034000	0	0	21432000	0	0	0	42383000	16057000	0
AT1G31870.2	AT1G31870.2	unknown protein; FUNCTIONS IN: molecular_function unknown; INVOLVED IN: biological_process unknown; LOCATED IN: cytosol, nucleus; EXPRESSED IN: 25 plant structures; EXPRESSED DURING: 15 growth stages; CONTAINS InterPro DOMAIN/s: Protein of unknown functio	0.998581	S	225	28.4738	5.40986e-14	153.65	137.02	140.45	10065000	7762200	6129200	17631000	12443000	18416000	6102900	5045000	8550900	6593500	4504700	12455000	12856000	8919000	8746300	9298400	2719300	9433600	2780100	6085200
AT1G31870.2	AT1G31870.2	unknown protein; FUNCTIONS IN: molecular_function unknown; INVOLVED IN: biological_process unknown; LOCATED IN: cytosol, nucleus; EXPRESSED IN: 25 plant structures; EXPRESSED DURING: 15 growth stages; CONTAINS InterPro DOMAIN/s: Protein of unknown functio	1	S	233	92.424	5.40986e-14	153.65	137.02	112.47	10065000	7762200	6129200	17631000	12443000	18416000	6102900	5045000	8550900	6593500	4504700	12455000	12856000	8919000	8746300	9298400	2719300	9433600	2780100	6085200
AT1G31870.2	AT1G31870.2	unknown protein; FUNCTIONS IN: molecular_function unknown; INVOLVED IN: biological_process unknown; LOCATED IN: cytosol, nucleus; EXPRESSED IN: 25 plant structures; EXPRESSED DURING: 15 growth stages; CONTAINS InterPro DOMAIN/s: Protein of unknown functio	0.999971	S	266	45.3706	0.000875813	68.173	51.294	68.173	6316600	7167800	7902400	18305000	8060100	0	6353900	4138600	7375300	5498400	4819100	11616000	0	0	6086800	6769700	1849600	7876300	3388200	7877600
AT1G31870.2	AT1G31870.2	unknown protein; FUNCTIONS IN: molecular_function unknown; INVOLVED IN: biological_process unknown; LOCATED IN: cytosol, nucleus; EXPRESSED IN: 25 plant structures; EXPRESSED DURING: 15 growth stages; CONTAINS InterPro DOMAIN/s: Protein of unknown functio	0.999993	S	268	51.7458	0.000875813	68.173	51.294	68.173	6316600	7167800	7902400	18305000	8060100	0	6353900	4138600	7375300	5498400	4819100	11616000	0	0	6086800	6769700	1849600	7876300	3388200	7877600
AT1G31870.2	AT1G31870.2	unknown protein; FUNCTIONS IN: molecular_function unknown; INVOLVED IN: biological_process unknown; LOCATED IN: cytosol, nucleus; EXPRESSED IN: 25 plant structures; EXPRESSED DURING: 15 growth stages; CONTAINS InterPro DOMAIN/s: Protein of unknown functio	1	S	286	93.6529	1.76637e-63	218.6	187.77	161.82	28314000	21134000	18774000	39520000	24295000	26493000	16032000	13066000	19467000	15803000	12358000	36312000	24976000	19199000	19183000	22488000	7824500	20793000	9487600	20719000
AT1G31870.2	AT1G31870.2	unknown protein; FUNCTIONS IN: molecular_function unknown; INVOLVED IN: biological_process unknown; LOCATED IN: cytosol, nucleus; EXPRESSED IN: 25 plant structures; EXPRESSED DURING: 15 growth stages; CONTAINS InterPro DOMAIN/s: Protein of unknown functio	0.5	S	326	0	8.94548e-06	93.345	73.559	93.345	4266900	6751900	5290200	12411000	9967800	6671400	7322100	2075300	1566800	6591100	4618900	8391700	4033400	6325000	7917200	2965700	2886900	8815000	2715100	5206600
AT1G31870.2	AT1G31870.2	unknown protein; FUNCTIONS IN: molecular_function unknown; INVOLVED IN: biological_process unknown; LOCATED IN: cytosol, nucleus; EXPRESSED IN: 25 plant structures; EXPRESSED DURING: 15 growth stages; CONTAINS InterPro DOMAIN/s: Protein of unknown functio	0.98875	S	327	19.4393	8.26752e-23	146.16	111.34	136.53	21538000	14761000	18667000	25637000	17053000	24166000	16046000	12450000	23164000	13239000	10236000	22642000	24596000	15315000	17055000	20812000	7884400	16690000	8884100	16475000
AT1G31870.2	AT1G31870.2	unknown protein; FUNCTIONS IN: molecular_function unknown; INVOLVED IN: biological_process unknown; LOCATED IN: cytosol, nucleus; EXPRESSED IN: 25 plant structures; EXPRESSED DURING: 15 growth stages; CONTAINS InterPro DOMAIN/s: Protein of unknown functio	0.992045	S	148	21.3023	0.00716675	54.234	25.258	40.856	10909000	9198500	8513000	21344000	12003000	0	9893300	0	9417700	8169100	0	14843000	14641000	3052800	0	10354000	0	0	3729900	0
AT1G31870.2	AT1G31870.2	unknown protein; FUNCTIONS IN: molecular_function unknown; INVOLVED IN: biological_process unknown; LOCATED IN: cytosol, nucleus; EXPRESSED IN: 25 plant structures; EXPRESSED DURING: 15 growth stages; CONTAINS InterPro DOMAIN/s: Protein of unknown functio	0.963938	S	128	15.3079	0.000156806	75.669	58.267	70.622	0	0	0	0	0	5336500	1971300	3641200	5540200	0	0	4707400	3802400	3388300	0	5099300	4478000	0	1721100	11565000
AT1G31870.2	AT1G31870.2	unknown protein; FUNCTIONS IN: molecular_function unknown; INVOLVED IN: biological_process unknown; LOCATED IN: cytosol, nucleus; EXPRESSED IN: 25 plant structures; EXPRESSED DURING: 15 growth stages; CONTAINS InterPro DOMAIN/s: Protein of unknown functio	0.997843	S	130	26.4771	1.01959e-05	92.039	64.924	41.621	0	1589100	6200400	0	0	8091200	3022500	3641200	6948800	2171600	2801800	6799700	6613200	10201000	0	8747500	0	0	3560400	3872500
AT1G31870.2	AT1G31870.2	unknown protein; FUNCTIONS IN: molecular_function unknown; INVOLVED IN: biological_process unknown; LOCATED IN: cytosol, nucleus; EXPRESSED IN: 25 plant structures; EXPRESSED DURING: 15 growth stages; CONTAINS InterPro DOMAIN/s: Protein of unknown functio	1	S	200	76.556	3.85856e-10	118.24	72.96	118.24	7146400	4211500	3576200	10799000	8873000	9412100	4896500	3020900	4695200	4327200	3279200	8751400	6231800	4949400	5587200	5008700	1283800	6460600	1489100	5053100
AT1G31870.2	AT1G31870.2	unknown protein; FUNCTIONS IN: molecular_function unknown; INVOLVED IN: biological_process unknown; LOCATED IN: cytosol, nucleus; EXPRESSED IN: 25 plant structures; EXPRESSED DURING: 15 growth stages; CONTAINS InterPro DOMAIN/s: Protein of unknown functio	1	S	204	75.6509	3.85856e-10	118.24	72.96	87.498	12530000	9234300	9678500	23579000	15557000	18334000	4896500	7615800	9682000	8286100	7901100	16031000	14090000	11892000	11364000	5008700	4424600	14676000	3899700	12795000
AT1G31870.2	AT1G31870.2	unknown protein; FUNCTIONS IN: molecular_function unknown; INVOLVED IN: biological_process unknown; LOCATED IN: cytosol, nucleus; EXPRESSED IN: 25 plant structures; EXPRESSED DURING: 15 growth stages; CONTAINS InterPro DOMAIN/s: Protein of unknown functio	0.995496	T	112	25.2714	5.47396e-09	113.61	92.752	113.61	0	0	0	0	0	0	0	0	0	0	0	35738000	36276000	0	0	0	0	0	0	17697000
AT1G31930.3	AT1G31930.3	extra-large GTP-binding protein 3 ; extra-large GTP-binding protein 3 ; extra-large GTP-binding protein 3	0.94097	S	506	12.2828	2.77112e-07	71.881	66.45	71.881	0	0	6485800	8697100	8845200	0	0	0	0	0	0	0	0	7689800	0	8107200	0	0	1596400	0
AT1G31930.3	AT1G31930.3	extra-large GTP-binding protein 3 ; extra-large GTP-binding protein 3 ; extra-large GTP-binding protein 3	0.510584	T	516	1.81535	0.000126637	53.615	48.711	45.836	0	0	0	0	0	7949200	6911100	0	0	0	0	0	8830600	0	0	0	0	0	0	0
AT1G31970.1	AT1G31970.1	DEA(D/H)-box RNA helicase family protein	0.99996	S	533	43.9628	8.10103e-05	78.655	77.19	78.655	0	2534600	46389000	0	86247000	0	0	0	0	0	26285000	59893000	0	0	65374000	60197000	15791000	83504000	11839000	0
AT1G31970.1	AT1G31970.1	DEA(D/H)-box RNA helicase family protein	0.84921	S	19	7.5081	0.000193111	75.564	59.808	67.115	2916400	2010400	2991400	5362300	3173500	2986300	0	1359900	0	0	0	4290100	2219000	2002500	0	2650300	0	3164300	0	0
AT1G32090.1	AT1G32090.1	early-responsive to dehydration stress protein (ERD4)	0.996408	S	50	24.4317	6.15715e-05	92.247	66.625	78.903	0	15064000	12448000	22422000	10549000	13743000	9891100	0	9678600	6634500	6356000	20545000	0	0	9377300	0	4456900	0	0	11500000
AT1G32090.1	AT1G32090.1	early-responsive to dehydration stress protein (ERD4)	0.950201	T	45	12.8079	0.00606446	71.085	49.453	65.5	0	0	0	0	0	0	0	9976500	0	0	0	0	12751000	12024000	0	0	0	0	5712300	0
AT1G32130.2	AT1G32130.2	Transcription elongation factor (TFIIS) family protein ; Transcription elongation factor (TFIIS) family protein	0.368974	Y	185	1.37481	7.95052e-17	112.8	95.725	112.8	0	0	0	0	0	0	0	0	0	0	0	0	0	0	0	0	0	0	0	0
AT1G32130.2	AT1G32130.2	Transcription elongation factor (TFIIS) family protein ; Transcription elongation factor (TFIIS) family protein	0.326085	Y	197	0.64082	5.55659e-16	107.76	96.88	98.967	0	0	0	0	0	0	0	0	0	0	0	0	0	0	0	0	0	0	0	0
AT1G32130.2	AT1G32130.2	Transcription elongation factor (TFIIS) family protein ; Transcription elongation factor (TFIIS) family protein	0.993869	S	193	22.1156	2.07859e-101	225.58	197.12	225.58	48845000	58416000	42165000	0	69740000	94242000	46388000	32292000	30660000	38187000	36743000	68679000	71030000	54824000	43750000	49280000	13091000	43712000	13782000	36967000
AT1G32130.2	AT1G32130.2	Transcription elongation factor (TFIIS) family protein ; Transcription elongation factor (TFIIS) family protein	0.53452	T	195	0.600707	3.08497e-74	202.44	185.77	202.44	0	0	0	60298000	0	0	0	0	0	0	0	0	0	0	0	0	0	0	0	0
AT1G32150.1	AT1G32150.1	basic region/leucine zipper transcription factor 68	0.996609	S	156	24.6815	9.06362e-05	76.522	65.032	76.522	3797300	0	0	0	5837800	6065600	0	0	3662000	2828000	0	3440000	0	4401500	2224000	4048200	949610	0	762020	1882500
AT1G32400.3	AT1G32400.3	tobamovirus multiplication 2A ; tobamovirus multiplication 2A ; tobamovirus multiplication 2A	1	S	196	84.5006	2.15882e-153	289.95	268.7	284.46	65114000	42200000	30275000	58522000	45702000	69375000	51922000	28114000	38365000	28182000	25091000	53220000	55630000	35414000	29459000	58242000	16419000	31032000	17927000	30685000
AT1G32400.3	AT1G32400.3	tobamovirus multiplication 2A ; tobamovirus multiplication 2A ; tobamovirus multiplication 2A	0.434943	S	233	0	0.00102684	55.994	44.471	46.956	0	0	0	0	0	0	0	0	0	0	0	0	0	0	0	0	0	0	0	0
AT1G32400.3	AT1G32400.3	tobamovirus multiplication 2A ; tobamovirus multiplication 2A ; tobamovirus multiplication 2A	0.434943	S	235	0	0.00228765	48.697	39.476	46.956	0	0	0	0	0	0	0	0	0	0	0	0	0	0	0	0	0	0	0	0
AT1G32400.3	AT1G32400.3	tobamovirus multiplication 2A ; tobamovirus multiplication 2A ; tobamovirus multiplication 2A	0.696677	S	258	6.01067	3.3952e-15	117.52	106.41	47.487	0	0	0	0	0	0	0	0	0	0	0	0	0	0	0	0	0	9858500	0	0
AT1G32400.3	AT1G32400.3	tobamovirus multiplication 2A ; tobamovirus multiplication 2A ; tobamovirus multiplication 2A	0.996886	S	260	25.0527	1.9559e-152	279.54	252.28	172.97	16977000	10849000	16850000	28942000	13473000	23099000	14137000	11816000	19001000	17624000	13245000	17587000	25015000	18143000	8609000	19521000	5994600	17189000	5444600	13278000
AT1G32400.3	AT1G32400.3	tobamovirus multiplication 2A ; tobamovirus multiplication 2A ; tobamovirus multiplication 2A	0.831346	T	227	7.22211	0.00102684	55.994	44.471	43.162	3784600	2508400	0	0	0	6340600	3639400	2748300	4330200	0	0	2984200	3965800	3015700	0	0	0	2620100	816150	2552100
AT1G32490.2	AT1G32490.2	RNA helicase family protein ; RNA helicase family protein	0.999955	S	135	43.4263	1.55157e-27	169.67	150.6	169.67	5421600	4679800	4054600	16284000	8411900	12017000	5001300	2329700	4588400	3396900	2207600	12720000	10529000	5797900	11904000	17322000	0	7758500	0	5516900
AT1G32490.2	AT1G32490.2	RNA helicase family protein ; RNA helicase family protein	1	S	138	88.7266	7.41533e-38	184.44	161.43	130.01	16484000	13313000	15644000	34019000	20692000	25624000	13358000	9060600	16362000	9690200	8548400	27453000	22141000	17729000	20787000	29643000	4643700	27126000	3650100	18526000
AT1G32490.2	AT1G32490.2	RNA helicase family protein ; RNA helicase family protein	0.999975	S	162	46.002	6.62745e-12	104.03	87.412	104.03	0	0	0	0	0	0	0	0	0	0	0	0	0	0	0	0	0	0	0	0
AT1G32490.2	AT1G32490.2	RNA helicase family protein ; RNA helicase family protein	0.999997	S	164	55.1193	6.62745e-12	104.03	87.412	104.03	0	0	0	0	0	0	0	0	0	0	0	0	0	0	0	0	0	0	0	0
AT1G32640.1	AT1G32640.1	Basic helix-loop-helix (bHLH) DNA-binding family protein	0.998977	S	417	29.9257	0.000568368	88.637	64.786	85.362	6742200	6559200	4867600	14184000	10075000	11653000	6283100	3338600	5160000	3597400	5459300	9807800	9046500	5721100	9419500	6236500	1531100	5781600	1380600	5915200
AT1G32640.1	AT1G32640.1	Basic helix-loop-helix (bHLH) DNA-binding family protein	0.999714	S	420	36.3264	0.000568368	88.637	64.786	85.362	6742200	6559200	4867600	14184000	10075000	11653000	6283100	3338600	5160000	3597400	5459300	9807800	9046500	5721100	9419500	6236500	1531100	5781600	1380600	5915200
AT1G32690.1	AT1G32690.1	unknown protein; FUNCTIONS IN: molecular_function unknown; INVOLVED IN: biological_process unknown; LOCATED IN: plasma membrane; EXPRESSED IN: 21 plant structures; EXPRESSED DURING: 11 growth stages; BEST Arabidopsis thaliana protein match is: unknown pro	0.998985	S	102	29.9918	0.00675654	51.39	32.346	51.39	0	1916600	0	3990500	3559200	0	3059100	1241300	1236100	3054000	0	2484600	2554900	1094000	1582300	3350900	905600	2878300	741230	3277700
AT1G32730.1	AT1G32730.1	unknown protein; LOCATED IN: chloroplast; EXPRESSED IN: 12 plant structures; EXPRESSED DURING: 6 growth stages; CONTAINS InterPro DOMAIN/s: Protein of unknown function DUF702 (InterPro:IPR007818); Has 120 Blast hits to 118 proteins in 39 species: Archae -	0.657077	T	288	3.63367	0.00135035	65.043	42.126	65.043	4551900	4669900	5162100	3446800	6939300	4879900	4791100	0	2946100	2364100	1907500	5751800	7129700	3054200	0	3878400	0	2906800	0	1975800
AT1G32750.1	AT1G32750.1	HAC13 protein (HAC13)	0.609213	S	403	1.94937	2.13341e-05	107.34	84.103	107.34	0	0	3630900	6013400	4239800	6333400	4564200	0	4493400	0	0	0	4687800	3953200	3383800	0	0	0	1777700	0
AT1G32750.1	AT1G32750.1	HAC13 protein (HAC13)	0.528663	T	401	0.96684	0.000119883	94.01	71.779	90.926	0	0	0	0	0	0	0	0	0	0	0	4541900	0	0	0	0	0	4437700	0	0
AT1G32790.1	AT1G32790.1	CTC-interacting domain 11 ; CTC-interacting domain 11	1	S	78	78.5164	3.87653e-08	111.72	88.491	84.297	17766000	14846000	11235000	16463000	11743000	10714000	15968000	7180000	9786400	10413000	7811800	14214000	12378000	10115000	9294200	14078000	3781800	11537000	5175300	8989800
AT1G32790.1	AT1G32790.1	CTC-interacting domain 11	0.999128	S	352	30.5917	0.00427494	56.359	23.13	46.73	12096000	9261100	13746000	11714000	9161500	0	0	8487600	8987000	10696000	10278000	10916000	0	14824000	0	11733000	5810600	0	9581700	11453000
AT1G33050.3	AT1G33050.3	unknown protein; FUNCTIONS IN: molecular_function unknown; INVOLVED IN: biological_process unknown; LOCATED IN: cellular_component unknown; EXPRESSED IN: 25 plant structures; EXPRESSED DURING: 15 growth stages; BEST Arabidopsis thaliana protein match is:	0.934821	S	213	14.5964	5.97553e-12	93.29	75.02	93.29	1721200	0	1422500	8096500	9849700	0	3774900	2265300	2295400	3120200	2292400	0	0	0	0	13989000	1090800	0	710960	0
AT1G33050.3	AT1G33050.3	unknown protein; FUNCTIONS IN: molecular_function unknown; INVOLVED IN: biological_process unknown; LOCATED IN: cellular_component unknown; EXPRESSED IN: 25 plant structures; EXPRESSED DURING: 15 growth stages; BEST Arabidopsis thaliana protein match is:	0.865339	S	167	8.07946	0.000645759	64.439	42.393	64.439	0	11540000	12540000	0	14130000	0	0	0	0	10073000	0	19280000	12887000	0	12108000	0	4550100	16433000	0	12104000
AT1G33050.3	AT1G33050.3	unknown protein; FUNCTIONS IN: molecular_function unknown; INVOLVED IN: biological_process unknown; LOCATED IN: cellular_component unknown; EXPRESSED IN: 25 plant structures; EXPRESSED DURING: 15 growth stages; BEST Arabidopsis thaliana protein match is:	0.341263	T	215	0.287752	0.00113485	43.438	30.095	43.438	0	0	0	0	0	0	0	0	0	0	0	0	0	0	0	0	0	0	0	0
AT1G33050.3	AT1G33050.3	unknown protein; FUNCTIONS IN: molecular_function unknown; INVOLVED IN: biological_process unknown; LOCATED IN: cellular_component unknown; EXPRESSED IN: 25 plant structures; EXPRESSED DURING: 15 growth stages; BEST Arabidopsis thaliana protein match is:	0.499999	T	168	0	0.00169782	57.348	34.874	57.348	0	11540000	12540000	0	14130000	0	0	0	0	10073000	0	19280000	0	0	0	0	4550100	16433000	0	12104000
AT1G33240.1	AT1G33240.1	GT-2-like 1	0.933404	S	17	12.446	8.79471e-05	51.566	46.51	51.566	0	0	0	4784900	4342600	4472700	0	2338900	3284500	0	0	5850800	0	5916900	5196500	6520200	1065200	0	1291600	0
AT1G33240.1	AT1G33240.1	GT-2-like 1	1	S	650	107.417	3.70207e-132	273.07	244.71	128.22	16005000	11159000	15208000	42889000	32606000	19240000	20756000	9446900	12397000	12620000	18126000	23046000	23669000	20350000	14894000	24600000	3425100	11841000	2632500	15870000
AT1G33470.2	AT1G33470.2	RNA-binding (RRM/RBD/RNP motifs) family protein ; RNA-binding (RRM/RBD/RNP motifs) family protein	0.999969	S	89	44.2007	2.45231e-05	83.849	68.694	71.697	32202000	22374000	38224000	46379000	36645000	0	18737000	22346000	36062000	21607000	16394000	49533000	31184000	46340000	23210000	27318000	11183000	39563000	13613000	37939000
AT1G33470.2	AT1G33470.2	RNA-binding (RRM/RBD/RNP motifs) family protein ; RNA-binding (RRM/RBD/RNP motifs) family protein	0.972017	S	93	15.4075	2.45231e-05	83.849	68.694	80.238	64504000	39820000	38224000	82705000	67474000	20209000	40278000	38727000	60784000	41254000	32974000	83772000	60489000	77326000	36357000	49797000	18041000	67460000	28415000	73562000
AT1G33680.1	AT1G33680.1	KH domain-containing protein	0.975057	S	204	15.9208	2.94376e-05	77.562	57.808	77.562	0	0	5755300	0	0	0	0	0	0	6290800	0	9931000	0	0	0	0	0	0	0	6233700
AT1G33680.1	AT1G33680.1	KH domain-containing protein	0.992452	S	206	21.189	5.47695e-05	102.64	81.577	102.64	10271000	5409900	0	7780600	5941300	7520900	5512700	0	7716700	0	4197400	0	9450000	7356600	0	7190400	0	6141700	4116900	0
AT1G33680.1	AT1G33680.1	KH domain-containing protein	0.986092	S	152	18.5066	6.47194e-05	100.43	84.173	100.43	0	0	0	0	6314800	5981200	0	0	0	0	0	0	0	0	0	5078900	0	0	0	4611600
AT1G33680.1	AT1G33680.1	KH domain-containing protein	0.999996	S	154	55.0117	1.05624e-92	243.9	225.7	209.89	44041000	31370000	27491000	50987000	36424000	45108000	26709000	20003000	32574000	22969000	20812000	41851000	41976000	31457000	31624000	32734000	11696000	40178000	12222000	27537000
AT1G33680.1	AT1G33680.1	KH domain-containing protein	0.998459	S	186	28.1192	1.06522e-06	101.62	81.804	92.147	14875000	7933000	12502000	10647000	16426000	11672000	10286000	5661100	9550100	3264300	4270700	14843000	20187000	10033000	4194200	6415600	0	9307000	2373500	2023100
AT1G33990.1	AT1G33990.1	methyl esterase 14	1	S	46	65.1068	0.000608643	67.605	30.835	65.107	5521400	3219300	3460000	4657000	4277500	5453200	2683900	2334100	4574300	2637200	2199400	5413900	5313700	3806600	2928000	4617400	1275700	4923400	1139500	3970000
AT1G33990.1	AT1G33990.1	methyl esterase 14	1	S	55	65.1068	9.6668e-10	130.47	110.04	65.107	16979000	12937000	13336000	20201000	14967000	21247000	11789000	8756900	17002000	10705000	9727700	22015000	22881000	13255000	12847000	16691000	3726100	19553000	3713200	12740000
AT1G33990.1	AT1G33990.1	methyl esterase 14	0.955257	S	77	13.2944	6.58491e-06	97.463	70.365	97.463	13652000	16599000	13525000	17920000	16817000	15132000	12209000	9254400	14044000	0	9535400	17509000	17283000	17814000	12538000	16936000	7094100	25491000	8576700	16926000
AT1G34020.1	AT1G34020.1	Nucleotide-sugar transporter family protein	0.99598	S	326	23.9399	7.28634e-06	100.43	60.696	82.663	11441000	0	0	0	0	0	13456000	0	4752800	3847600	0	0	6104400	0	5792500	0	4253000	0	0	7942000
AT1G34020.1	AT1G34020.1	Nucleotide-sugar transporter family protein	0.995051	S	328	23.0333	1.73146e-06	111.34	76.576	111.34	0	8077200	0	6270500	5032800	0	0	10275000	3823400	0	9164800	10850000	10748000	0	11128000	10426000	0	14800000	7959400	13457000
AT1G34220.2	AT1G34220.2	Regulator of Vps4 activity in the MVB pathway protein ; Regulator of Vps4 activity in the MVB pathway protein	0.459565	S	234	0	3.85089e-31	128.5	124.61	128.5	0	0	0	0	0	0	0	0	0	0	0	0	0	0	0	0	0	0	0	0
AT1G34220.2	AT1G34220.2	Regulator of Vps4 activity in the MVB pathway protein ; Regulator of Vps4 activity in the MVB pathway protein	0.473828	S	236	4.21314	3.85089e-31	128.5	124.61	42.038	0	0	0	0	0	0	0	0	0	0	0	0	0	0	0	0	0	0	0	0
AT1G34220.2	AT1G34220.2	Regulator of Vps4 activity in the MVB pathway protein ; Regulator of Vps4 activity in the MVB pathway protein	0.255981	S	238	0	1.5392e-07	67.441	62.954	67.441	0	0	0	0	0	0	0	0	0	0	0	0	0	0	0	0	0	0	0	0
AT1G34220.2	AT1G34220.2	Regulator of Vps4 activity in the MVB pathway protein ; Regulator of Vps4 activity in the MVB pathway protein	0.247423	S	603	0	0.0126658	41.446	26.502	41.446	0	0	0	0	0	0	0	0	0	0	0	0	0	0	0	0	0	0	0	0
AT1G34220.2	AT1G34220.2	Regulator of Vps4 activity in the MVB pathway protein ; Regulator of Vps4 activity in the MVB pathway protein	0.247423	S	604	0	0.0126658	41.446	26.502	41.446	0	0	0	0	0	0	0	0	0	0	0	0	0	0	0	0	0	0	0	0
AT1G34220.2	AT1G34220.2	Regulator of Vps4 activity in the MVB pathway protein ; Regulator of Vps4 activity in the MVB pathway protein	0.247423	S	606	0	0.0126658	41.446	26.502	41.446	0	0	0	0	0	0	0	0	0	0	0	0	0	0	0	0	0	0	0	0
AT1G34220.2	AT1G34220.2	Regulator of Vps4 activity in the MVB pathway protein ; Regulator of Vps4 activity in the MVB pathway protein	0.840887	S	608	12.423	0.000113453	75.797	62.726	65.213	0	0	0	16744000	0	0	0	8032700	11216000	8445900	7287400	0	0	0	0	0	2014200	9598000	2191100	8951800
AT1G34220.2	AT1G34220.2	Regulator of Vps4 activity in the MVB pathway protein ; Regulator of Vps4 activity in the MVB pathway protein	1	S	353	91.0375	6.52916e-06	91.396	77.414	91.396	657000	705340	728920	3164000	0	984760	2013000	262900	563820	984800	0	0	2092000	0	0	7342800	73156	1587600	215670	1078000
AT1G34220.2	AT1G34220.2	Regulator of Vps4 activity in the MVB pathway protein ; Regulator of Vps4 activity in the MVB pathway protein	0.997823	S	327	26.955	6.93764e-05	99.451	78.498	99.451	5657800	4305000	3386900	9384100	4643000	6372400	5065600	3938800	6084900	3170600	4156600	6025300	5152100	4673600	4171800	6196400	1538900	6482100	1042900	3802300
AT1G34220.2	AT1G34220.2	Regulator of Vps4 activity in the MVB pathway protein ; Regulator of Vps4 activity in the MVB pathway protein	0.775258	S	495	5.51503	5.81881e-06	94.019	80.962	94.019	0	0	6887700	0	0	0	8629100	3277000	0	0	4208500	0	4684000	7208800	3701000	7768800	1855200	6169100	0	5988400
AT1G34220.2	AT1G34220.2	Regulator of Vps4 activity in the MVB pathway protein ; Regulator of Vps4 activity in the MVB pathway protein	0.49009	S	496	0	8.08439e-05	78.794	65.139	78.794	0	0	0	0	0	0	0	0	0	0	0	0	0	0	0	0	0	0	0	0
AT1G34220.2	AT1G34220.2	Regulator of Vps4 activity in the MVB pathway protein ; Regulator of Vps4 activity in the MVB pathway protein	0.919352	S	547	11.333	3.00203e-10	95.255	83.108	71.907	4701800	0	0	4543600	5925400	3377400	3156000	2182300	2768400	3608100	0	0	0	5036600	2982200	7588200	884660	0	0	3888000
AT1G34220.2	AT1G34220.2	Regulator of Vps4 activity in the MVB pathway protein ; Regulator of Vps4 activity in the MVB pathway protein	0.49559	S	548	0	2.47277e-07	73.341	62.236	48.693	0	0	0	0	0	0	0	0	0	0	0	0	0	0	0	0	0	0	0	0
AT1G34220.2	AT1G34220.2	Regulator of Vps4 activity in the MVB pathway protein ; Regulator of Vps4 activity in the MVB pathway protein	0.203184	S	550	0	0.00364599	40.819	28.586	40.819	0	0	0	0	0	0	0	0	0	0	0	0	0	0	0	0	0	0	0	0
AT1G34220.2	AT1G34220.2	Regulator of Vps4 activity in the MVB pathway protein ; Regulator of Vps4 activity in the MVB pathway protein	0.203184	S	551	0	0.00364599	40.819	28.586	40.819	0	0	0	0	0	0	0	0	0	0	0	0	0	0	0	0	0	0	0	0
AT1G34220.2	AT1G34220.2	Regulator of Vps4 activity in the MVB pathway protein ; Regulator of Vps4 activity in the MVB pathway protein	0.999939	S	469	42.1355	9.26174e-38	194.39	173.33	176.94	17411000	16522000	16950000	25199000	16067000	16846000	14044000	0	14716000	12822000	15845000	18049000	15817000	13057000	11680000	14232000	4061300	14277000	6362000	8638200
AT1G34220.2	AT1G34220.2	Regulator of Vps4 activity in the MVB pathway protein ; Regulator of Vps4 activity in the MVB pathway protein	0.601382	S	470	1.99421	0.000209148	74.962	56.65	69.451	0	0	0	0	0	0	0	10507000	0	0	0	0	0	0	0	0	0	0	0	0
AT1G34320.1	AT1G34320.1	Protein of unknown function (DUF668)	0.999991	S	586	50.4299	7.95478e-13	145.04	122.47	58.37	11403000	21274000	9206000	30335000	24103000	11451000	18117000	10155000	12344000	17078000	10807000	19591000	5054600	9540100	20726000	9907200	6248300	7496900	7994000	13484000
AT1G34570.1	AT1G34570.1	Essential protein Yae1, N-terminal	0.780048	S	42	5.96425	2.50917e-05	79.9	65.738	79.9	1317300	1194600	1576500	1986900	1960700	2089200	880910	686250	1370300	1349700	1383100	2467700	2199300	1927200	1699600	3023700	634630	1497800	366900	1813800
AT1G34750.1	AT1G34750.1	Protein phosphatase 2C family protein	0.391009	S	117	0	0.00186842	57.136	40.11	57.136	0	0	0	0	0	0	0	0	0	0	0	0	0	0	0	0	0	0	0	0
AT1G34750.1	AT1G34750.1	Protein phosphatase 2C family protein	0.891396	S	119	9.20664	5.1523e-10	134.14	116.28	112.34	6121500	11531000	5072700	9689900	0	5968100	8549200	5737300	4530200	5728000	5506200	7766900	7155200	4987700	6682000	8081600	0	0	3731000	4209600
AT1G34750.1	AT1G34750.1	Protein phosphatase 2C family protein	0.587438	S	120	1.60867	1.28936e-05	89.541	68.588	89.541	0	0	0	0	5484600	0	0	0	0	0	0	0	0	0	0	0	0	0	0	0
AT1G35160.1	AT1G35160.1	GF14 protein phi chain	0.466808	S	242	0	0.00653453	51.875	39.709	51.875	0	0	0	0	0	0	0	0	0	0	0	0	0	0	0	0	0	0	0	0
AT1G35160.1	AT1G35160.1	GF14 protein phi chain	1	S	248	73.1959	1.71874e-37	183.56	163.82	183.56	13880000	12002000	7106000	20870000	0	2180700	0	2230500	13512000	8550500	8606300	9111600	0	9936500	40498000	47753000	0	10266000	0	4892300
AT1G35220.1	AT1G35220.1	unknown protein; FUNCTIONS IN: molecular_function unknown; INVOLVED IN: biological_process unknown; LOCATED IN: cellular_component unknown; EXPRESSED IN: 22 plant structures; EXPRESSED DURING: 13 growth stages; Has 313 Blast hits to 185 proteins in 75 spe	0.999993	S	327	51.3116	2.22743e-07	108.56	98.577	96.745	49553000	55944000	42160000	85914000	60270000	69100000	47886000	34411000	42101000	43205000	37816000	54417000	56676000	45209000	57321000	63661000	20506000	55487000	24812000	47144000
AT1G35220.1	AT1G35220.1	unknown protein; FUNCTIONS IN: molecular_function unknown; INVOLVED IN: biological_process unknown; LOCATED IN: cellular_component unknown; EXPRESSED IN: 22 plant structures; EXPRESSED DURING: 13 growth stages; Has 313 Blast hits to 185 proteins in 75 spe	0.488383	S	890	0	1.07978e-08	119.25	104.56	119.25	0	0	0	0	0	0	0	0	0	0	0	0	0	0	0	0	0	0	0	0
AT1G35220.1	AT1G35220.1	unknown protein; FUNCTIONS IN: molecular_function unknown; INVOLVED IN: biological_process unknown; LOCATED IN: cellular_component unknown; EXPRESSED IN: 22 plant structures; EXPRESSED DURING: 13 growth stages; Has 313 Blast hits to 185 proteins in 75 spe	0.916457	S	891	13.4389	1.88527e-29	173.87	155.29	173.87	339670	0	389980	0	871600	1041300	0	238750	322160	947450	864310	0	0	606780	664860	5276000	0	0	107420	0
AT1G35220.1	AT1G35220.1	unknown protein; FUNCTIONS IN: molecular_function unknown; INVOLVED IN: biological_process unknown; LOCATED IN: cellular_component unknown; EXPRESSED IN: 22 plant structures; EXPRESSED DURING: 13 growth stages; Has 313 Blast hits to 185 proteins in 75 spe	0.965633	T	927	15.1	0.00802463	54.524	46.8	54.524	1408300	0	0	0	1839200	1960300	1146100	1149500	0	0	775540	1485600	0	1668700	713200	0	569290	1331900	0	0
AT1G35510.1	AT1G35510.1	O-fucosyltransferase family protein	0.579575	S	20	1.48585	0.00764094	58.978	36.448	58.978	0	0	0	0	2547500	0	0	1197200	1666200	0	0	0	3462900	0	0	0	0	0	0	0
AT1G35510.1	AT1G35510.1	O-fucosyltransferase family protein	0.925702	S	26	11.3119	0.00764094	58.978	36.448	58.978	0	0	0	0	2547500	0	0	1197200	1666200	0	0	0	3462900	0	0	3172000	0	0	0	0
AT1G35580.2	AT1G35580.2	cytosolic invertase 1 ; cytosolic invertase 1 ; cytosolic invertase 1	1	S	11	99.3439	1.0133e-110	251.38	235.84	221.99	108890000	94275000	93738000	111580000	139220000	115850000	116910000	52341000	48442000	51456000	37580000	107080000	149730000	83030000	25840000	79369000	4240700	79021000	22086000	29138000
AT1G35580.2	AT1G35580.2	cytosolic invertase 1 ; cytosolic invertase 1 ; cytosolic invertase 1	0.999983	S	14	47.642	1.0133e-110	251.38	235.84	209.23	84663000	73603000	68607000	85710000	112250000	94015000	92267000	38179000	39168000	41273000	29917000	88140000	118990000	66743000	30977000	60388000	6303000	62064000	14935000	25834000
AT1G35580.2	AT1G35580.2	cytosolic invertase 1 ; cytosolic invertase 1 ; cytosolic invertase 1	0.710199	S	16	0.882528	0.00120422	71.594	65.16	60.317	0	0	15764000	27450000	0	0	0	12526000	0	0	9583500	0	0	0	15336000	0	0	0	6794700	0
AT1G35580.2	AT1G35580.2	cytosolic invertase 1 ; cytosolic invertase 1 ; cytosolic invertase 1	1	S	66	94.132	2.83256e-38	185.26	164.31	107.72	77556000	56147000	42796000	69757000	47463000	126410000	46109000	43452000	67694000	48312000	29221000	90505000	86602000	60825000	42326000	105510000	25537000	86252000	24840000	86039000
AT1G35580.2	AT1G35580.2	cytosolic invertase 1 ; cytosolic invertase 1 ; cytosolic invertase 1	0.968717	S	73	14.9083	2.11552e-29	166.7	128.48	58.997	82940000	71172000	63934000	75939000	106820000	130440000	18326000	46800000	17808000	11817000	51045000	14516000	29530000	26812000	106010000	61235000	31364000	96094000	22419000	62749000
AT1G35580.2	AT1G35580.2	cytosolic invertase 1 ; cytosolic invertase 1 ; cytosolic invertase 1	0.857601	S	74	7.79068	3.18527e-22	153.39	128.97	153.39	9601500	12279000	3238400	26150000	16124000	19505000	2613300	2837200	3376400	50478000	6190400	31330000	0	72172000	1289500	0	6029600	15753000	4709400	15785000
AT1G35580.2	AT1G35580.2	cytosolic invertase 1 ; cytosolic invertase 1 ; cytosolic invertase 1	1	S	61	79.492	3.46547e-18	139.76	122.83	79.492	3653000	5171200	5586600	22103000	11600000	4229800	5974000	1471800	510990	3619400	9307800	2969100	2626200	6487800	17153000	598840	795520	0	1021300	0
AT1G35580.2	AT1G35580.2	cytosolic invertase 1 ; cytosolic invertase 1 ; cytosolic invertase 1 ; cytosolic invertase 2 ; Plant neutral invertase family protein ; cytosolic invertase 2	1	S	39	52.255	0.00268853	72.325	28.18	52.255	0	10299000	0	0	17877000	11044000	25999000	0	6734500	0	15076000	0	0	0	0	80394000	33415000	0	56224000	0
AT1G35580.2	AT1G35580.2	cytosolic invertase 1 ; cytosolic invertase 1	0.875365	S	545	8.46551	0.0139061	58.426	50.455	58.426	0	2852700	1588200	0	0	0	4462300	2491000	2862400	1167600	795800	2167200	3695000	3131800	2904400	25868000	2386400	0	1003300	2897800
AT1G35580.2	AT1G35580.2	cytosolic invertase 1 ; cytosolic invertase 1 ; cytosolic invertase 1	0.998872	S	44	29.4709	2.24154e-10	116.54	73.828	97.911	27713000	9612200	35870000	6466200	4816500	17404000	9380700	10546000	19832000	2378600	3381800	26973000	27542000	19154000	3788000	26474000	4722000	23842000	4000800	13370000
AT1G35580.2	AT1G35580.2	cytosolic invertase 1 ; cytosolic invertase 1 ; cytosolic invertase 1	0.779944	S	46	6.43407	3.05722e-07	107.97	57.772	107.97	0	25310000	0	0	0	0	0	0	0	0	0	0	0	0	0	0	0	0	0	0
AT1G35580.2	AT1G35580.2	cytosolic invertase 1 ; cytosolic invertase 1 ; cytosolic invertase 1	0.936439	S	49	11.7622	7.85552e-16	135.6	112.88	135.6	23295000	0	39222000	28640000	21962000	22120000	27830000	13524000	26687000	18646000	14568000	0	32721000	25384000	17141000	28918000	7171400	36052000	9504200	19435000
AT1G35580.2	AT1G35580.2	cytosolic invertase 1 ; cytosolic invertase 1 ; cytosolic invertase 1	1	T	70	68.8407	2.83256e-38	185.26	164.31	177.6	473530000	408460000	338050000	583590000	398040000	478100000	459660000	295430000	361070000	351500000	280340000	459020000	485540000	343160000	349340000	509880000	198640000	538000000	213910000	463920000
AT1G35580.2	AT1G35580.2	cytosolic invertase 1 ; cytosolic invertase 1 ; cytosolic invertase 1	0.587971	T	50	1.86233	3.55105e-05	88.552	67.514	56.205	7598900	0	0	0	0	0	0	0	0	0	0	36422000	0	0	0	0	0	0	0	0
AT1G35670.1	AT1G35670.1	calcium-dependent protein kinase 2	1	S	493	59.5133	0.00679087	59.513	44.9	59.513	0	309600	0	1571400	633080	482830	805700	0	127440	283310	307740	635320	504000	288900	465380	1510100	0	330100	0	210840
AT1G35780.1	AT1G35780.1	unknown protein; BEST Arabidopsis thaliana protein match is: unknown protein (TAIR:AT1G78150.2); Has 145 Blast hits to 144 proteins in 16 species: Archae - 0; Bacteria - 0; Metazoa - 0; Fungi - 0; Plants - 145; Viruses - 0; Other Eukaryotes - 0 (source: N	0.66902	S	234	3.23325	3.79113e-05	77.912	59.132	77.912	0	0	0	0	0	0	0	0	0	7073400	0	0	0	0	0	0	0	0	0	0
AT1G35780.1	AT1G35780.1	unknown protein; BEST Arabidopsis thaliana protein match is: unknown protein (TAIR:AT1G78150.2); Has 145 Blast hits to 144 proteins in 16 species: Archae - 0; Bacteria - 0; Metazoa - 0; Fungi - 0; Plants - 145; Viruses - 0; Other Eukaryotes - 0 (source: N	0.993626	S	235	25.3278	6.66856e-08	117.92	94.998	112.08	10660000	5522100	7683300	11033000	9715200	12749000	6426800	5419300	9174000	0	6004600	11417000	12245000	7557200	10058000	7614600	4072100	10643000	2819200	9922000
AT1G36160.2	AT1G36160.2	acetyl-CoA carboxylase 1 ; acetyl-CoA carboxylase 1	1	T	1031	74.5131	3.30013e-63	222.94	207.41	222.79	9518700	8944000	9469200	13060000	7168900	10391000	10357000	6961800	9821800	8217200	7022000	11891000	11384000	9545000	10291000	14710000	2234700	9571500	2436200	8188200
AT1G36310.2	AT1G36310.2	S-adenosyl-L-methionine-dependent methyltransferases superfamily protein ; S-adenosyl-L-methionine-dependent methyltransferases superfamily protein	0.961009	S	44	13.941	3.92307e-27	170.11	145.73	170.11	3726300	0	2116900	3745300	1676300	11012000	3393600	1346700	1840300	5286900	5358200	0	6739800	0	7861600	7550300	749510	3732200	0	0
AT1G36310.2	AT1G36310.2	S-adenosyl-L-methionine-dependent methyltransferases superfamily protein ; S-adenosyl-L-methionine-dependent methyltransferases superfamily protein	0.951106	S	45	12.9203	1.98321e-10	140.84	121.6	115.56	0	5281500	2940600	11453000	8554300	3308400	7169000	2778500	4329600	0	0	7299100	0	4680600	3679500	3221200	0	0	0	0
AT1G36310.2	AT1G36310.2	S-adenosyl-L-methionine-dependent methyltransferases superfamily protein ; S-adenosyl-L-methionine-dependent methyltransferases superfamily protein	1	S	234	109.317	7.59733e-09	135.38	114.8	130.27	6388900	12462000	6368500	14525000	9072100	12918000	7190400	5854100	9373000	4708800	2902100	11879000	11224000	7303300	10293000	15734000	1464300	11638000	1246300	6622300
AT1G36310.2	AT1G36310.2	S-adenosyl-L-methionine-dependent methyltransferases superfamily protein ; S-adenosyl-L-methionine-dependent methyltransferases superfamily protein	1	S	238	117.07	7.59733e-09	135.38	114.8	130.27	12021000	6904600	9716200	20775000	13937000	18552000	11519000	5717700	9373000	7736600	5379700	18249000	6606600	12575000	14019000	11254000	2984800	19128000	3342700	10534000
AT1G36310.2	AT1G36310.2	S-adenosyl-L-methionine-dependent methyltransferases superfamily protein ; S-adenosyl-L-methionine-dependent methyltransferases superfamily protein	0.666602	T	43	0	0.00170776	75.695	59.576	75.695	0	0	0	0	0	3308400	0	0	0	0	0	0	0	0	0	3221200	0	0	0	0
AT1G36730.1	AT1G36730.1	Translation initiation factor IF2/IF5	1	S	434	207.58	9.55707e-62	218.88	202.86	218.88	0	0	0	0	240440	221920	0	0	0	0	0	224650	0	0	2037400	9971700	0	0	0	114520
AT1G36730.1	AT1G36730.1	Translation initiation factor IF2/IF5	1	S	436	209.346	9.55707e-62	218.88	202.86	218.88	0	0	0	0	240440	221920	0	0	0	0	0	224650	0	0	2037400	9971700	0	0	0	114520
AT1G36940.1	AT1G36940.1	unknown protein; Has 21 Blast hits to 21 proteins in 8 species: Archae - 0; Bacteria - 0; Metazoa - 0; Fungi - 0; Plants - 21; Viruses - 0; Other Eukaryotes - 0 (source: NCBI BLink). ; unknown protein; FUNCTIONS IN: molecular_function unknown; INVOLVED IN	0.5	S	8	0	0.00455472	53.034	20.972	53.034	0	64245000	61561000	0	0	48810000	0	44423000	0	0	0	61751000	67360000	44796000	0	0	14141000	0	0	34735000
AT1G36940.1	AT1G36940.1	unknown protein; Has 21 Blast hits to 21 proteins in 8 species: Archae - 0; Bacteria - 0; Metazoa - 0; Fungi - 0; Plants - 21; Viruses - 0; Other Eukaryotes - 0 (source: NCBI BLink). ; unknown protein; FUNCTIONS IN: molecular_function unknown; INVOLVED IN	0.5	T	4	0	0.00455472	53.034	20.972	53.034	0	64245000	61561000	0	0	48810000	0	44423000	0	0	0	61751000	67360000	44796000	0	0	14141000	0	0	34735000
AT1G37130.1	AT1G37130.1	nitrate reductase 2	0.996715	S	534	24.8788	7.17284e-14	137.95	123.01	137.95	87329000	72706000	81499000	116440000	83585000	96146000	105100000	69929000	80815000	74388000	76812000	109200000	88847000	82140000	75181000	93881000	31515000	106040000	39789000	70166000
AT1G42470.1	AT1G42470.1	Patched family protein	0.988712	T	318	19.4488	0.000364339	66.282	53.353	66.282	4023300	5063600	6619700	5398000	5248500	5266100	7709400	2804100	4459900	3496900	3477100	7062300	5605800	7439100	3308000	6640200	1513700	5736500	1934800	4156300
AT1G43130.1	AT1G43130.1	like COV 2	0.997914	S	28	30.1586	5.2483e-13	96.534	85.134	96.534	12562000	13197000	9228300	15233000	13731000	16116000	12252000	6010000	10488000	9986900	0	0	0	0	8986500	12194000	2487400	25195000	4134000	10831000
AT1G43130.1	AT1G43130.1	like COV 2	0.935401	S	32	13.321	5.2483e-13	96.534	85.134	65.378	12562000	13197000	9228300	15233000	13731000	16116000	12252000	6010000	10488000	9986900	0	0	0	0	8986500	12194000	2487400	25195000	4134000	10831000
AT1G43690.1	AT1G43690.1	ubiquitin interaction motif-containing protein	1	S	73	54.5244	0.00332207	54.524	38.271	54.524	0	0	0	0	0	0	0	0	0	0	0	0	0	0	0	0	0	0	0	0
AT1G43690.1	AT1G43690.1	ubiquitin interaction motif-containing protein	1	S	75	54.5244	0.00332207	54.524	38.271	54.524	0	0	0	0	0	0	0	0	0	0	0	0	0	0	0	0	0	0	0	0
AT1G43690.1	AT1G43690.1	ubiquitin interaction motif-containing protein	0.397908	S	38	1.43677	0.00305825	49.618	38.179	49.618	0	0	0	0	0	0	0	0	0	0	0	0	0	0	0	0	0	0	0	0
AT1G43690.1	AT1G43690.1	ubiquitin interaction motif-containing protein	0.605102	S	40	1.90299	1.35099e-08	121.25	105.65	121.25	0	0	0	0	0	0	0	0	0	0	0	0	0	4247300	0	0	0	6489200	0	0
AT1G43690.1	AT1G43690.1	ubiquitin interaction motif-containing protein	0.994503	S	42	22.7306	3.23225e-16	153.56	137.97	153.56	0	2833100	3765600	8106800	3705600	10674000	4939600	1743000	4432900	0	0	6251900	6682100	4247300	5315400	6794900	0	0	0	3155300
AT1G43690.1	AT1G43690.1	ubiquitin interaction motif-containing protein	1	S	46	68.0079	4.52531e-259	342.14	312.07	153.56	20619000	14953000	16183000	21934000	3705600	29607000	15957000	9663400	16031000	8329100	5485500	21113000	30415000	18644000	12563000	20442000	2595600	23767000	2388000	10007000
AT1G43700.1	AT1G43700.1	VIRE2-interacting protein 1	0.546342	S	113	0.818049	9.65689e-05	81.428	68.867	81.428	0	0	0	0	0	0	0	0	0	0	0	0	0	0	0	0	0	0	0	1117100
AT1G43700.1	AT1G43700.1	VIRE2-interacting protein 1	0.99758	S	115	26.1527	1.39474e-20	167.28	142.74	167.28	823720	2043800	1776900	6853500	4268800	3231800	3590300	1145100	1270400	77194	2477000	4565100	3886700	2353800	3909600	8098700	0	2563100	354570	454810
AT1G43700.1	AT1G43700.1	VIRE2-interacting protein 1	0.999518	S	118	32.6507	0.000355675	83.213	75.124	83.213	0	240480	0	1369800	875480	661780	342950	0	0	77194	95723	735240	435320	267480	2037100	3013900	0	659220	0	454810
AT1G43710.1	AT1G43710.1	Pyridoxal phosphate (PLP)-dependent transferases superfamily protein	1	S	4	78.6394	4.31996e-111	256.67	227.87	227	12966000	8599200	12387000	19791000	16194000	22948000	17511000	6627300	11959000	9994300	10798000	19520000	16364000	13636000	10259000	12922000	2803200	18369000	2076300	10503000
AT1G43910.1	AT1G43910.1	P-loop containing nucleoside triphosphate hydrolases superfamily protein	0.996912	S	457	25.0901	5.33171e-79	237.14	201.46	218.07	14698000	7328000	14091000	16849000	11601000	15453000	5814800	7844200	14311000	6479800	12234000	15059000	13230000	11076000	10082000	7489200	0	11623000	2005500	8473300
AT1G43910.1	AT1G43910.1	P-loop containing nucleoside triphosphate hydrolases superfamily protein	0.583838	S	458	1.4703	0.000974662	67.275	46.046	67.275	11881000	9001100	0	10226000	9673900	9312500	6226800	0	8808000	6469700	0	12188000	11124000	9227500	4881300	9086100	2352600	12128000	2691600	9257900
AT1G44800.1	AT1G44800.1	nodulin MtN21 /EamA-like transporter family protein	1	S	341	75.4074	1.77621e-08	113.24	77.562	87.001	15687000	5298400	17040000	30648000	12068000	13985000	6847400	9292000	12764000	4585300	15566000	21136000	17770000	12699000	13288000	12520000	8165500	14284000	3081200	14566000
AT1G44900.2	AT1G44900.2	minichromosome maintenance (MCM2/3/5) family protein ; minichromosome maintenance (MCM2/3/5) family protein	0.962333	S	720	18.8713	0.00440732	41.27	38.728	41.27	2580500	1138300	700470	3622100	0	0	2235400	1225200	1509800	1009200	1309400	0	1861400	0	1288300	8679000	0	0	0	0
AT1G44910.2	AT1G44910.2	pre-mRNA-processing protein 40A ; pre-mRNA-processing protein 40A	0.999745	S	892	39.2349	0.00322018	52.898	44.404	52.898	1016500	0	1720200	1518100	0	3489200	0	1274600	0	0	1102200	2287900	0	0	0	0	0	2604600	0	0
AT1G44910.2	AT1G44910.2	pre-mRNA-processing protein 40A ; pre-mRNA-processing protein 40A	0.428782	S	897	0	0.0123842	41.084	35.118	41.084	0	0	0	0	0	0	0	0	0	0	0	0	0	0	0	0	0	0	0	0
AT1G44910.2	AT1G44910.2	pre-mRNA-processing protein 40A ; pre-mRNA-processing protein 40A	0.428782	S	898	0	0.0123842	41.084	35.118	41.084	0	0	0	0	0	0	0	0	0	0	0	0	0	0	0	0	0	0	0	0
AT1G44910.2	AT1G44910.2	pre-mRNA-processing protein 40A ; pre-mRNA-processing protein 40A	0.99999	S	858	49.8847	2.48783e-13	144.27	117.46	144.27	54516000	30004000	35125000	66272000	40249000	74228000	46788000	35935000	54840000	32506000	24497000	89106000	74880000	49304000	37339000	64138000	11487000	82726000	9449700	40837000
AT1G45207.2	AT1G45207.2	Remorin family protein	0.997984	S	364	26.9474	0.00252193	56.951	35.445	56.951	6771800	0	0	8265000	5310100	0	4480600	3950600	0	0	3379400	7933500	0	0	0	0	2496200	7564200	0	4542300
AT1G45545.1	AT1G45545.1	Plant protein of unknown function (DUF827)	0.364883	S	148	0.605619	0.00556068	49.31	40.378	49.31	0	0	0	0	0	0	0	0	0	0	0	0	0	0	0	0	0	0	0	0
AT1G45545.1	AT1G45545.1	Plant protein of unknown function (DUF827)	0.65565	S	151	5.80746	0.00148318	61.648	50.747	61.648	137290	0	0	0	306090	380750	0	0	164200	743730	145120	183210	0	244240	147200	2420600	0	467340	214850	174990
AT1G45545.1	AT1G45545.1	Plant protein of unknown function (DUF827)	0.999915	S	114	40.6917	0.00131806	58.83	39.252	58.83	0	1738400	0	0	0	0	0	0	422450	2497700	448720	796530	791580	361170	268450	3570400	0	217480	561120	581760
AT1G45688.2	AT1G45688.2	unknown protein; FUNCTIONS IN: molecular_function unknown; INVOLVED IN: biological_process unknown; LOCATED IN: plasma membrane; EXPRESSED IN: 22 plant structures; EXPRESSED DURING: 13 growth stages; BEST Arabidopsis thaliana protein match is: unknown pro	0.992955	S	30	22.1478	1.68962e-09	136.64	117.59	81.839	105690000	78560000	52764000	144010000	104320000	120960000	96132000	47059000	77509000	63071000	50169000	132390000	129500000	93399000	55366000	71259000	22815000	45821000	26080000	40305000
AT1G45688.2	AT1G45688.2	unknown protein; FUNCTIONS IN: molecular_function unknown; INVOLVED IN: biological_process unknown; LOCATED IN: plasma membrane; EXPRESSED IN: 22 plant structures; EXPRESSED DURING: 13 growth stages; BEST Arabidopsis thaliana protein match is: unknown pro	0.655223	S	32	2.79444	0.00474243	56.947	43.956	56.947	0	0	0	44158000	0	0	0	0	0	0	0	0	0	0	0	0	0	0	0	0
AT1G45688.2	AT1G45688.2	unknown protein; FUNCTIONS IN: molecular_function unknown; INVOLVED IN: biological_process unknown; LOCATED IN: plasma membrane; EXPRESSED IN: 22 plant structures; EXPRESSED DURING: 13 growth stages; BEST Arabidopsis thaliana protein match is: unknown pro	0.996924	S	35	25.2827	0.000151252	82.849	64.602	68.074	43369000	29832000	0	0	33339000	41869000	34032000	16377000	27084000	22749000	18342000	46550000	51324000	29948000	23386000	27275000	7678100	0	8366900	1974900
AT1G45688.2	AT1G45688.2	unknown protein; FUNCTIONS IN: molecular_function unknown; INVOLVED IN: biological_process unknown; LOCATED IN: plasma membrane; EXPRESSED IN: 22 plant structures; EXPRESSED DURING: 13 growth stages; BEST Arabidopsis thaliana protein match is: unknown pro	0.911827	S	56	12.2146	7.76494e-07	83.332	71.499	83.332	11425000	0	9237300	0	12667000	14768000	18706000	9267100	0	0	6519000	18070000	12693000	13166000	9226000	13145000	0	22006000	4583300	0
AT1G45688.2	AT1G45688.2	unknown protein; FUNCTIONS IN: molecular_function unknown; INVOLVED IN: biological_process unknown; LOCATED IN: plasma membrane; EXPRESSED IN: 22 plant structures; EXPRESSED DURING: 13 growth stages; BEST Arabidopsis thaliana protein match is: unknown pro	0.555228	S	11	0.708279	0.014324	43.162	28.908	43.162	0	23738000	0	0	0	0	0	0	0	0	0	0	0	0	0	0	0	0	0	0
AT1G45688.2	AT1G45688.2	unknown protein; FUNCTIONS IN: molecular_function unknown; INVOLVED IN: biological_process unknown; LOCATED IN: plasma membrane; EXPRESSED IN: 22 plant structures; EXPRESSED DURING: 13 growth stages; BEST Arabidopsis thaliana protein match is: unknown pro	0.813188	S	15	6.41211	9.89179e-49	206.64	172.95	139.66	0	23738000	11820000	0	0	12753000	5924700	12867000	7952600	25218000	12989000	29575000	23588000	33997000	34506000	8674200	13067000	50126000	11860000	9850500
AT1G45688.2	AT1G45688.2	unknown protein; FUNCTIONS IN: molecular_function unknown; INVOLVED IN: biological_process unknown; LOCATED IN: plasma membrane; EXPRESSED IN: 22 plant structures; EXPRESSED DURING: 13 growth stages; BEST Arabidopsis thaliana protein match is: unknown pro	0.989231	S	16	19.6311	3.85244e-131	273.52	242.56	256.79	62144000	81022000	48057000	13506000	87914000	83433000	60009000	43470000	47084000	40465000	41315000	70663000	91256000	54766000	58182000	59875000	21101000	61948000	21598000	0
AT1G45688.2	AT1G45688.2	unknown protein; FUNCTIONS IN: molecular_function unknown; INVOLVED IN: biological_process unknown; LOCATED IN: plasma membrane; EXPRESSED IN: 22 plant structures; EXPRESSED DURING: 13 growth stages; BEST Arabidopsis thaliana protein match is: unknown pro	1	S	20	65.7669	3.85244e-131	273.52	242.56	257.93	104150000	106510000	73063000	153900000	104560000	121210000	94262000	56887000	71139000	69639000	54161000	111680000	120980000	86808000	78777000	90361000	32938000	95174000	33717000	75996000
AT1G45688.2	AT1G45688.2	unknown protein; FUNCTIONS IN: molecular_function unknown; INVOLVED IN: biological_process unknown; LOCATED IN: plasma membrane; EXPRESSED IN: 22 plant structures; EXPRESSED DURING: 13 growth stages; BEST Arabidopsis thaliana protein match is: unknown pro	0.870141	T	10	11.2933	1.64627e-09	139.74	111.88	139.74	13092000	0	0	0	0	0	0	0	0	0	0	0	0	0	0	0	0	0	0	0
AT1G47200.1	AT1G47200.1	WPP domain protein 2	1	S	173	67.4585	1.04109e-136	254.04	239.09	250.9	31310000	43467000	30105000	18728000	48533000	64867000	46568000	8967300	31080000	50527000	21833000	57306000	41315000	42879000	24353000	37149000	11561000	37995000	14039000	28361000
AT1G47250.1;AT5G42790.1	AT5G42790.1	20S proteasome alpha subunit F2 ; proteasome alpha subunit F1	0.554999	S	90	0.959337	5.41724e-06	111.33	94.446	111.33	0	0	2292900	0	6841500	0	0	1487500	0	0	0	0	0	4002300	0	0	0	0	0	855700
AT1G47250.1;AT5G42790.1	AT5G42790.1	20S proteasome alpha subunit F2 ; proteasome alpha subunit F1	0.851754	S	92	7.59434	3.15118e-05	94.882	79.29	94.882	0	0	0	5266000	0	0	0	0	3914200	3571200	4118600	3943300	0	0	0	4485900	0	5349200	0	0
AT1G47250.1;AT5G42790.1	AT5G42790.1	20S proteasome alpha subunit F2 ; proteasome alpha subunit F1	0.412578	S	96	0.479952	0.0039294	52.172	45.141	46.833	0	0	0	0	0	0	0	0	0	0	0	0	0	0	0	0	0	0	0	0
AT1G47250.1;AT5G42790.1	AT5G42790.1	20S proteasome alpha subunit F2 ; proteasome alpha subunit F1	0.410409	T	98	0	0.00362996	54.223	46.511	52.172	0	0	0	0	0	0	0	0	0	0	0	0	0	0	0	0	0	0	0	0
AT1G47490.2	AT1G47490.2	RNA-binding protein 47C ; RNA-binding protein 47C	0.492503	S	44	0	0.00162777	58.676	44.324	40.724	0	0	0	0	0	0	0	0	0	0	0	0	0	0	0	0	0	0	0	0
AT1G47490.2	AT1G47490.2	RNA-binding protein 47C ; RNA-binding protein 47C	0.492503	T	43	0	0.00162777	58.676	44.324	40.724	0	0	0	0	0	0	0	0	0	0	0	0	0	0	0	0	0	0	0	0
AT1G47490.2	AT1G47490.2	RNA-binding protein 47C ; RNA-binding protein 47C	0.427055	T	46	1.73401	0.00893244	48.44	34.087	48.44	0	0	0	0	0	0	0	0	0	0	0	0	0	0	0	0	0	0	0	0
AT1G47500.1	AT1G47500.1	RNA-binding protein 47C'	0.336151	S	44	0	0.0195307	43.613	22.913	43.613	0	0	0	0	0	0	0	0	0	0	0	0	0	0	0	0	0	0	0	0
AT1G47670.1	AT1G47670.1	Transmembrane amino acid transporter family protein	0.48683	S	27	0	1.24526e-05	91.767	71.029	91.767	0	0	0	0	0	0	0	0	0	0	0	0	0	0	0	0	0	0	0	0
AT1G47670.1	AT1G47670.1	Transmembrane amino acid transporter family protein	0.48683	S	31	0	1.24526e-05	91.767	71.029	91.767	0	0	0	0	0	0	0	0	0	0	0	0	0	0	0	0	0	0	0	0
AT1G47820.2	AT1G47820.2	unknown protein; BEST Arabidopsis thaliana protein match is: unknown protein (TAIR:AT1G47813.1); Has 29 Blast hits to 29 proteins in 9 species: Archae - 0; Bacteria - 0; Metazoa - 0; Fungi - 0; Plants - 29; Viruses - 0; Other Eukaryotes - 0 (source: NCBI	1	S	71	64.4445	3.81824e-38	141.57	131.76	141.57	14801000	8245300	8077400	20868000	31201000	0	15226000	0	5579100	0	6866200	0	13802000	15202000	0	1826000	948550	15022000	0	0
AT1G47900.2	AT1G47900.2	Plant protein of unknown function (DUF869) ; Plant protein of unknown function (DUF869)	0.999989	S	379	50.8207	3.98039e-07	116.29	100.9	116.29	4632400	3952700	5151700	6342900	3901800	7142800	3446900	3184300	3319200	3469000	0	4128300	6262900	3554100	3068300	4790200	1619500	4878400	1376900	3103500
AT1G47970.1	AT1G47970.1	unknown protein; FUNCTIONS IN: molecular_function unknown; INVOLVED IN: biological_process unknown; LOCATED IN: cytosol; EXPRESSED IN: 21 plant structures; EXPRESSED DURING: 11 growth stages; Has 93717 Blast hits to 40765 proteins in 1891 species: Archae	1	S	22	97.7971	1.05205e-42	192.1	182.28	97.797	2777700	5117200	5718800	47633000	13926000	11902000	3267700	0	2823300	0	0	13352000	4723300	5275200	17708000	31332000	0	8994300	784240	7757800
AT1G47970.1	AT1G47970.1	unknown protein; FUNCTIONS IN: molecular_function unknown; INVOLVED IN: biological_process unknown; LOCATED IN: cytosol; EXPRESSED IN: 21 plant structures; EXPRESSED DURING: 11 growth stages; Has 93717 Blast hits to 40765 proteins in 1891 species: Archae	1	S	26	97.7971	1.05205e-42	192.1	182.28	97.797	2777700	5117200	5718800	47633000	13926000	11902000	3267700	0	2823300	0	0	13352000	4723300	5275200	17708000	31332000	0	8994300	784240	7757800
AT1G48050.1	AT1G48050.1	Ku80 family protein	0.492516	S	532	0	0.00661495	49.765	29.868	42.322	0	0	0	0	0	0	0	0	0	0	0	0	0	0	0	0	0	0	0	0
AT1G48050.1	AT1G48050.1	Ku80 family protein	0.492516	S	534	0	0.00661495	49.765	29.868	42.322	0	0	0	0	0	0	0	0	0	0	0	0	0	0	0	0	0	0	0	0
AT1G48110.2	AT1G48110.2	evolutionarily conserved C-terminal region 7 ; evolutionarily conserved C-terminal region 7	0.489839	S	535	0	0.00736155	57.164	32.311	54.023	0	0	0	0	0	0	0	0	0	0	0	0	0	0	0	0	0	0	0	0
AT1G48110.2	AT1G48110.2	evolutionarily conserved C-terminal region 7 ; evolutionarily conserved C-terminal region 7	0.870028	S	537	10.9284	0.00736155	57.164	32.311	53.557	0	0	0	0	0	6677000	0	0	0	0	0	0	5830300	0	0	0	0	0	0	0
AT1G48120.1	AT1G48120.1	hydrolases;protein serine/threonine phosphatases	1	S	961	70.4119	3.79329e-05	89.013	69.742	70.412	5787600	6351500	5458200	9759800	6040900	6913200	5746200	3846100	3869100	4812600	3985200	7261700	7670500	6381400	5566300	6754300	2233600	8462500	2410100	6511400
AT1G48210.2	AT1G48210.2	Protein kinase superfamily protein ; Protein kinase superfamily protein ; Protein kinase superfamily protein	1	S	353	75.4622	1.57097e-05	95.71	79.178	75.462	0	11244000	8510400	13993000	11279000	8486900	8835600	7938500	9391900	10208000	6601500	17846000	3799500	10402000	12021000	11933000	3322900	11456000	3338400	6683300
AT1G48210.2	AT1G48210.2	Protein kinase superfamily protein ; Protein kinase superfamily protein ; Protein kinase superfamily protein	1	T	357	65.1366	1.57097e-05	95.71	79.178	75.462	0	6466600	8510400	13993000	11279000	8486900	8835600	4882300	9391900	10208000	6601500	13697000	0	6560500	12021000	7770200	2337600	7948800	1521300	6683300
AT1G48380.1	AT1G48380.1	root hair initiation protein root hairless 1 (RHL1) ; root hair initiation protein root hairless 1 (RHL1)	0.5	S	39	0	0.000365266	70.488	48.496	70.488	0	0	1770500	0	0	0	0	0	0	0	0	0	0	0	1418200	0	531300	0	0	0
AT1G48380.1	AT1G48380.1	root hair initiation protein root hairless 1 (RHL1) ; root hair initiation protein root hairless 1 (RHL1)	0.906218	S	41	9.85111	6.60486e-05	97.214	77.82	97.214	1727500	1058000	1770500	2759300	1845000	2623400	1178800	1292500	2110600	1287800	1755300	2957900	2126600	1513000	1418200	1350200	531300	2640500	384300	1322100
AT1G48410.1	AT1G48410.1	Stabilizer of iron transporter SufD / Polynucleotidyl transferase ; Stabilizer of iron transporter SufD / Polynucleotidyl transferase ; Stabilizer of iron transporter SufD / Polynucleotidyl transferase	0.797478	S	1001	7.65822	6.0778e-15	101.67	86.077	101.67	0	0	0	0	0	0	0	0	0	0	0	0	0	0	0	0	0	0	0	0
AT1G48490.3	AT1G48490.3	Protein kinase superfamily protein ; Protein kinase superfamily protein ; Protein kinase superfamily protein	0.999983	S	632	48.128	0.000198495	80.469	59.218	80.469	508400	625650	530570	2832500	931190	722440	974150	316320	282900	0	1102100	1008400	569220	575560	578080	2082700	0	681690	86812	410050
AT1G48490.3;AT3G17850.1	AT3G17850.1	Protein kinase superfamily protein ; Protein kinase superfamily protein ; Protein kinase superfamily protein ; Protein kinase superfamily protein ; AGC (cAMP-dependent, cGMP-dependent and protein kinase C) kinase family protein	0.978444	S	298	17.0396	0.00861897	42.599	19.579	42.599	5333500	0	0	12462000	9730700	0	0	0	5542800	5533200	5093200	0	8010200	7904800	7068900	7971000	2105800	7052300	2430800	5581100
AT1G48540.2	AT1G48540.2	Outer arm dynein light chain 1 protein ; Outer arm dynein light chain 1 protein	0.999966	S	671	40.132	0.0203214	42.348	24.803	42.348	0	0	0	0	0	0	0	0	0	0	0	0	0	0	0	0	0	0	0	0
AT1G48540.2	AT1G48540.2	Outer arm dynein light chain 1 protein ; Outer arm dynein light chain 1 protein	0.915707	S	677	6.18255	0.0203214	42.348	24.803	42.348	0	0	0	0	0	0	0	0	0	0	0	0	0	0	0	0	0	0	0	0
AT1G48610.2	AT1G48610.2	AT hook motif-containing protein ; AT hook motif-containing protein	0.755616	S	11	4.90313	0.00623906	69.379	48.426	69.379	0	0	0	0	0	0	0	0	0	0	0	0	0	0	3806500	0	0	0	0	0
AT1G48610.2	AT1G48610.2	AT hook motif-containing protein ; AT hook motif-containing protein	0.571005	S	13	1.25099	0.00199206	68.576	48.47	68.576	0	5445100	3957100	7829200	0	5683700	0	0	4216200	0	1752700	3198000	0	3322600	0	0	1566200	4087100	1763500	3172900
AT1G48610.2	AT1G48610.2	AT hook motif-containing protein ; AT hook motif-containing protein	0.999994	T	7	55.2464	3.11269e-14	149.32	125.29	123.29	14299000	22430000	21722000	38765000	25030000	34944000	12970000	12114000	22420000	17164000	14031000	31032000	25590000	26107000	24582000	23643000	11765000	35456000	11529000	27651000
AT1G48620.1	AT1G48620.1	high mobility group A5	0.768736	S	334	5.2167	1.3429e-08	82.492	73.111	82.492	0	21817000	15995000	0	21782000	25237000	0	13452000	20803000	15151000	11200000	25594000	31660000	19425000	0	0	4068100	0	6833300	0
AT1G48620.1	AT1G48620.1	high mobility group A5	0.413155	S	180	0	5.92386e-05	62.677	52.558	62.677	0	0	0	0	0	0	0	0	0	0	0	0	0	0	0	0	0	0	0	0
AT1G48620.1	AT1G48620.1	high mobility group A5	0.601265	T	330	1.78383	1.88404e-08	81.242	70.404	81.242	19481000	21817000	15995000	36081000	21782000	0	25149000	0	0	15151000	11200000	0	31660000	19425000	17643000	24319000	0	24548000	0	20804000
AT1G48620.1	AT1G48620.1	high mobility group A5	0.413155	T	181	0	5.92386e-05	62.677	52.558	62.677	0	0	0	0	0	0	0	0	0	0	0	0	0	0	0	0	0	0	0	0
AT1G48760.3	AT1G48760.3	delta-adaptin ; delta-adaptin ; delta-adaptin	0.310436	S	689	0.184257	1.84271e-05	69.619	49.722	69.619	0	0	0	0	0	0	0	0	0	0	0	0	0	0	0	0	0	0	0	0
AT1G48760.3	AT1G48760.3	delta-adaptin ; delta-adaptin ; delta-adaptin	0.399545	S	690	0	1.61013e-06	82.849	62.594	82.849	0	0	0	0	0	0	0	0	0	0	0	0	0	0	0	0	0	0	0	0
AT1G48760.3	AT1G48760.3	delta-adaptin ; delta-adaptin ; delta-adaptin	0.760347	S	691	6.52922	2.21927e-07	97.047	86.179	97.047	7860500	0	10110000	0	0	0	1780600	0	6832500	0	0	0	0	0	2213100	15046000	0	13722000	3442600	0
AT1G48760.3	AT1G48760.3	delta-adaptin ; delta-adaptin ; delta-adaptin	0.264879	S	697	0	7.91346e-06	71.608	58.551	71.608	0	0	0	0	0	0	0	0	0	0	0	0	0	0	0	0	0	0	0	0
AT1G48760.3	AT1G48760.3	delta-adaptin ; delta-adaptin ; delta-adaptin	0.264879	S	698	0	7.91346e-06	71.608	58.551	71.608	0	0	0	0	0	0	0	0	0	0	0	0	0	0	0	0	0	0	0	0
AT1G48880.1	AT1G48880.1	TRICHOME BIREFRINGENCE-LIKE 7	0.491393	S	37	0	0.0154292	41.86	31.664	41.86	0	0	0	0	0	0	0	0	0	0	0	0	0	0	0	0	0	0	0	0
AT1G48880.1	AT1G48880.1	TRICHOME BIREFRINGENCE-LIKE 7	0.744387	S	41	4.69976	0.000319678	71.592	60.072	71.592	0	484560	500290	0	0	0	0	672920	1052700	347760	0	0	0	1443100	0	3228500	0	0	0	0
AT1G48920.1	AT1G48920.1	nucleolin like 1	1	S	388	48.1115	2.45712e-09	129.11	117.34	48.112	19884000	40504000	15758000	36241000	25889000	26076000	37724000	9481000	20978000	9817100	8884200	25536000	58716000	42963000	50293000	21055000	5245400	25104000	5108100	17625000
AT1G48920.1	AT1G48920.1	nucleolin like 1	0.983551	S	393	17.7723	2.05538e-11	121.23	95.278	113.43	0	0	42828000	84914000	39805000	67254000	0	0	7250200	0	16669000	35792000	0	20854000	7745500	0	2660600	53453000	2624900	6283900
AT1G48920.1	AT1G48920.1	nucleolin like 1	0.999997	S	413	54.6695	1.38983e-42	194.83	164.27	194.83	96287000	45833000	93012000	128370000	98355000	135020000	46610000	48581000	87027000	44101000	50611000	95859000	92081000	83791000	71859000	82114000	28668000	115180000	17381000	81239000
AT1G48920.1	AT1G48920.1	nucleolin like 1	0.598611	S	347	1.7358	5.68914e-60	183	154.71	183	0	8525500	0	0	0	0	0	0	0	0	0	0	0	11792000	0	4656200	2708600	0	2369200	0
AT1G48920.1	AT1G48920.1	nucleolin like 1	0.964244	S	348	14.3084	2.39425e-61	212.39	183.38	165.86	12403000	8525500	10173000	16357000	11973000	0	0	1099900	9101000	7730000	7535300	14036000	15920000	11792000	5146800	0	2708600	0	0	10283000
AT1G48920.1	AT1G48920.1	nucleolin like 1	1	S	454	77.1253	9.04505e-16	133.32	117.43	100.55	7219100	2632400	5813700	21507000	10779000	8953300	3978800	4024400	6965400	4579400	4078600	11754000	10561000	7848100	5656000	8783800	2242700	11914000	1236500	9008500
AT1G48920.1	AT1G48920.1	nucleolin like 1	0.62834	S	544	2.28048	0.00222648	63.624	15.34	63.624	4756600	2883700	4843400	6125900	5428600	6170400	2130800	2333900	4206300	0	2024100	6954200	6813800	5352400	3248000	0	1835500	7370200	1307900	4791800
AT1G48920.1	AT1G48920.1	nucleolin like 1	0.761421	S	269	5.03993	1.87944e-10	128.06	107.86	128.06	54980000	39576000	62035000	94624000	57535000	51378000	39849000	41747000	60458000	36046000	23253000	80173000	27941000	47202000	41873000	33869000	15771000	41305000	20347000	56149000
AT1G48920.1	AT1G48920.1	nucleolin like 1	0.998408	S	270	27.9733	6.07359e-32	180.78	144.46	165.24	120840000	45525000	111340000	157530000	92479000	184280000	52587000	91491000	155120000	36776000	42515000	151310000	206250000	158050000	63607000	112970000	23932000	254320000	11841000	106250000
AT1G48920.1	AT1G48920.1	nucleolin like 1	1	T	385	48.1115	2.45712e-09	129.11	117.34	48.112	19884000	18287000	15758000	36241000	25889000	26076000	12119000	9481000	20978000	9817100	8884200	25536000	26786000	17700000	21028000	21055000	5245400	25104000	5108100	17625000
AT1G49040.2	AT1G49040.2	stomatal cytokinesis defective / SCD1 protein (SCD1) ; stomatal cytokinesis defective / SCD1 protein (SCD1) ; stomatal cytokinesis defective / SCD1 protein (SCD1)	1	S	770	76.9629	5.21078e-14	149.3	118.91	145.86	11802000	7656900	6482900	13277000	11265000	11012000	10432000	6860400	9666000	7826500	7140100	12009000	11398000	8911700	8040000	8907400	2886300	9056600	3188800	6517100
AT1G49340.2	AT1G49340.2	Phosphatidylinositol 3- and 4-kinase family protein ; Phosphatidylinositol 3- and 4-kinase family protein	0.999259	S	1111	31.3002	2.02554e-08	107.33	88.962	107.33	800900	989540	1027500	4581800	1527000	0	1153100	518920	880510	1207700	1616000	1704900	1876800	0	1006700	6649900	0	0	145460	677370
AT1G50120.1	AT1G50120.1	FUNCTIONS IN: molecular_function unknown; INVOLVED IN: biological_process unknown; LOCATED IN: cellular_component unknown; EXPRESSED IN: 23 plant structures; EXPRESSED DURING: 13 growth stages; CONTAINS InterPro DOMAIN/s: Rgp1 (InterPro:IPR014848), Immuno	0.987299	S	264	18.9949	1.34533e-06	100.22	61.075	91.657	7125100	4641500	2357700	14821000	5009900	8085500	5512300	2996100	3627100	2485200	3507800	7239600	4696600	5935100	2679300	8208800	864100	3176000	0	5261500
AT1G50120.1	AT1G50120.1	FUNCTIONS IN: molecular_function unknown; INVOLVED IN: biological_process unknown; LOCATED IN: cellular_component unknown; EXPRESSED IN: 23 plant structures; EXPRESSED DURING: 13 growth stages; CONTAINS InterPro DOMAIN/s: Rgp1 (InterPro:IPR014848), Immuno	0.870948	S	265	11.2981	6.07235e-08	118.76	97.534	118.76	0	0	0	0	0	0	0	0	0	0	0	14046000	2882500	0	0	0	0	0	0	0
AT1G50120.1	AT1G50120.1	FUNCTIONS IN: molecular_function unknown; INVOLVED IN: biological_process unknown; LOCATED IN: cellular_component unknown; EXPRESSED IN: 23 plant structures; EXPRESSED DURING: 13 growth stages; CONTAINS InterPro DOMAIN/s: Rgp1 (InterPro:IPR014848), Immuno	0.999458	S	267	32.7629	2.79172e-15	148.52	118.58	108.34	13255000	8556100	6194400	23049000	14557000	17270000	12902000	7523300	11037000	9560400	10031000	4056300	15323000	13095000	12432000	19445000	3791000	15595000	2951000	10215000
AT1G50120.1	AT1G50120.1	FUNCTIONS IN: molecular_function unknown; INVOLVED IN: biological_process unknown; LOCATED IN: cellular_component unknown; EXPRESSED IN: 23 plant structures; EXPRESSED DURING: 13 growth stages; CONTAINS InterPro DOMAIN/s: Rgp1 (InterPro:IPR014848), Immuno	0.999999	S	270	61.5731	7.18432e-11	114.54	103.43	114.54	0	3831700	2473600	5252300	6113700	8165000	3460900	2156000	4972300	0	0	5485800	5201000	6137800	5191600	7373000	0	2727300	0	6270400
AT1G50140.2	AT1G50140.2	P-loop containing nucleoside triphosphate hydrolases superfamily protein ; P-loop containing nucleoside triphosphate hydrolases superfamily protein	0.999736	T	293	35.9446	0.0118364	68.944	44.009	68.944	3479800	0	0	4863000	3946400	5096500	5389300	0	5076400	0	0	0	5422700	5801900	0	2031300	0	0	0	0
AT1G50240.2	AT1G50240.2	Protein kinase family protein with ARM repeat domain	0.996515	S	323	24.5634	2.07877e-06	109.65	96.023	109.65	1063700	878690	1202300	2240400	2829600	4841400	1336700	0	1706600	672240	0	2669800	2102000	0	1245800	5351600	0	2420100	312770	0
AT1G50380.1	AT1G50380.1	Prolyl oligopeptidase family protein	0.5	S	4	0	0.0089098	45.077	19.035	43.083	6690400	3996000	0	6273900	5578100	0	0	4194200	5364200	0	0	0	0	6583800	7105000	0	0	6516600	3916100	0
AT1G50380.1	AT1G50380.1	Prolyl oligopeptidase family protein	0.5	S	6	0	0.0089098	45.077	19.035	43.083	6690400	3996000	0	6273900	5578100	0	0	4194200	5364200	0	0	0	0	6583800	7105000	0	0	6516600	3916100	0
AT1G50570.2	AT1G50570.2	Calcium-dependent lipid-binding (CaLB domain) family protein ; Calcium-dependent lipid-binding (CaLB domain) family protein	0.240107	S	366	0	2.50975e-05	86.727	73.935	86.727	0	0	0	0	0	0	0	0	0	0	0	0	0	0	0	0	0	0	0	0
AT1G50570.2	AT1G50570.2	Calcium-dependent lipid-binding (CaLB domain) family protein ; Calcium-dependent lipid-binding (CaLB domain) family protein	0.240107	S	367	0	2.50975e-05	86.727	73.935	86.727	0	0	0	0	0	0	0	0	0	0	0	0	0	0	0	0	0	0	0	0
AT1G50570.2	AT1G50570.2	Calcium-dependent lipid-binding (CaLB domain) family protein ; Calcium-dependent lipid-binding (CaLB domain) family protein	0.314846	S	368	0	1.05214e-07	108.71	97.099	108.71	0	0	0	0	0	0	0	0	0	0	0	0	0	0	0	0	0	0	0	0
AT1G50570.2	AT1G50570.2	Calcium-dependent lipid-binding (CaLB domain) family protein ; Calcium-dependent lipid-binding (CaLB domain) family protein	0.554674	S	369	1.76009	2.43798e-08	112.5	100.89	100.45	0	0	0	0	0	0	0	0	8121500	0	0	0	0	0	0	0	0	0	0	0
AT1G50570.2	AT1G50570.2	Calcium-dependent lipid-binding (CaLB domain) family protein ; Calcium-dependent lipid-binding (CaLB domain) family protein	0.957014	T	372	14.2902	1.05261e-24	156.67	144.61	130.05	0	6111500	7526000	8903100	9884100	7456500	8524000	5909100	7985800	6540300	5658900	13667000	8252400	8015500	9133600	13143000	0	8559700	484910	8143200
AT1G50620.1	AT1G50620.1	RING/FYVE/PHD zinc finger superfamily protein	0.999986	S	28	48.6498	7.52085e-06	93.106	64.561	93.106	14818000	0	0	0	0	24858000	0	0	16092000	0	0	15074000	27833000	20755000	0	11767000	5214300	26434000	0	0
AT1G50620.1	AT1G50620.1	RING/FYVE/PHD zinc finger superfamily protein	0.723866	S	613	5.18782	0.00393753	42.536	35.26	42.536	0	0	11716000	0	15269000	0	0	0	0	20833000	0	15888000	0	7060300	11898000	0	5278200	0	0	0
AT1G50660.1	AT1G50660.1	unknown protein; INVOLVED IN: biological_process unknown; LOCATED IN: chloroplast; EXPRESSED IN: 22 plant structures; EXPRESSED DURING: 13 growth stages; BEST Arabidopsis thaliana protein match is: unknown protein (TAIR:AT3G20350.1); Has 21445 Blast hits	0.932969	S	491	12.1039	0.0142929	49.448	29.661	49.448	0	0	0	3752500	0	0	2960000	0	0	0	0	0	0	0	0	0	0	4529100	0	0
AT1G50890.1	AT1G50890.1	ARM repeat superfamily protein	0.99995	S	406	43.0406	0.00758249	49.482	33.592	49.482	0	2774600	0	3706200	1969500	1665800	3887100	0	0	2832600	0	0	2220000	0	0	0	0	0	0	0
AT1G50920.1	AT1G50920.1	Nucleolar GTP-binding protein	1	S	568	90.9378	3.78055e-19	146.28	127.98	95.138	14128000	5009800	9939600	21771000	9582400	25422000	6738400	7896100	15295000	0	4749400	15382000	25835000	10167000	7335400	10795000	2400600	23136000	0	11184000
AT1G50920.1	AT1G50920.1	Nucleolar GTP-binding protein	0.5	S	602	0	0.0157736	40.81	25.804	40.81	0	0	1466500	0	0	5383000	0	3577100	0	3569600	3397800	5918000	7229200	4586800	0	4844000	0	6517800	2303000	0
AT1G50920.1	AT1G50920.1	Nucleolar GTP-binding protein	0.5	S	604	0	0.0157736	40.81	25.804	40.81	0	0	1466500	0	0	5383000	0	3577100	0	3569600	3397800	5918000	7229200	4586800	0	4844000	0	6517800	2303000	0
AT1G51140.1	AT1G51140.1	basic helix-loop-helix (bHLH) DNA-binding superfamily protein	0.999942	S	213	42.3505	1.71098e-05	94.191	68.149	94.191	5610300	6264100	3202100	4875000	0	6961500	0	2544000	4728000	6061900	956380	0	7070500	5269500	3963000	10290000	1828800	4892100	2603900	0
AT1G51140.1	AT1G51140.1	basic helix-loop-helix (bHLH) DNA-binding superfamily protein	0.8634	S	290	8.00824	0.000934006	63.894	53.794	63.894	0	0	137490	0	0	0	0	0	0	0	179180	283670	514420	218940	156570	1122400	0	287980	97473	0
AT1G51160.2	AT1G51160.2	SNARE-like superfamily protein ; SNARE-like superfamily protein	0.558326	S	147	1.29162	0.00557338	49.715	37.849	49.715	0	4165400	0	0	3802000	0	0	2271100	0	0	2635800	4885900	0	4306400	3711700	4715000	1755800	0	0	2494800
AT1G51510.1	AT1G51510.1	RNA-binding (RRM/RBD/RNP motifs) family protein	1	S	32	75.5961	4.40434e-75	197.84	182.71	197.84	51895000	76365000	73375000	168990000	103370000	145040000	105930000	41202000	56088000	50553000	49663000	105480000	93772000	80008000	61689000	130330000	18106000	111300000	14528000	100960000
AT1G51600.2	AT1G51600.2	ZIM-LIKE 2 ; ZIM-LIKE 2	1	S	125	40.3693	0.0136189	41.115	32.406	40.369	0	5738500	4269100	7420700	7569200	2903700	5826600	3533500	0	5847500	4571700	0	0	0	3836100	0	2662900	5757200	2374500	7051000
AT1G51690.2	AT1G51690.2	protein phosphatase 2A 55 kDa regulatory subunit B alpha isoform ; protein phosphatase 2A 55 kDa regulatory subunit B alpha isoform ; protein phosphatase 2A 55 kDa regulatory subunit B alpha isoform	0.689337	S	469	3.83237	3.34755e-33	171.96	146.01	139.75	0	0	0	0	34867000	27967000	38333000	0	0	29690000	28748000	0	0	0	0	0	0	0	0	0
AT1G51690.2	AT1G51690.2	protein phosphatase 2A 55 kDa regulatory subunit B alpha isoform ; protein phosphatase 2A 55 kDa regulatory subunit B alpha isoform ; protein phosphatase 2A 55 kDa regulatory subunit B alpha isoform	0.997235	S	471	25.5718	2.03826e-93	241.51	225.2	192.85	24212000	28127000	20300000	36370000	20400000	26174000	15523000	15325000	17790000	17933000	18215000	31944000	27716000	27017000	14507000	18751000	7893800	23662000	8535400	18716000
AT1G51690.2	AT1G51690.2	protein phosphatase 2A 55 kDa regulatory subunit B alpha isoform ; protein phosphatase 2A 55 kDa regulatory subunit B alpha isoform ; protein phosphatase 2A 55 kDa regulatory subunit B alpha isoform	0.764874	S	466	5.24373	1.41315e-25	161.05	139.41	133.13	22013000	0	0	45311000	0	0	0	14559000	0	0	0	0	0	0	0	0	0	0	0	0
AT1G51745.2	AT1G51745.2	Tudor/PWWP/MBT superfamily protein ; Tudor/PWWP/MBT superfamily protein	0.996768	S	72	24.8908	0.000101721	88.768	76.902	64.52	0	2678000	4218500	3816000	5667900	4585000	2245000	1733700	1995800	0	0	2089700	5093700	2292600	0	0	0	0	850910	0
AT1G51800.1	AT1G51800.1	Leucine-rich repeat protein kinase family protein	1	S	561	63.4729	1.42346e-10	119.39	100.12	63.473	7811500	4585000	4053600	10175000	7828900	6279700	4931700	4490200	6076200	4225400	3456000	7634300	10061000	8302100	5416500	2832200	1675400	6974600	1355800	5442300
AT1G51800.1	AT1G51800.1	Leucine-rich repeat protein kinase family protein	0.524185	T	552	3.50011	0.000383626	74.46	42.617	74.46	5985100	0	0	0	0	0	0	0	0	0	0	0	0	0	0	0	0	0	0	0
AT1G51800.1	AT1G51800.1	Leucine-rich repeat protein kinase family protein	0.516136	T	554	1.59096	0.000254454	81.428	48.224	81.428	0	0	0	0	0	0	0	0	5581400	0	0	0	0	0	0	0	0	0	0	0
AT1G51800.1	AT1G51800.1	Leucine-rich repeat protein kinase family protein	0.639803	T	555	5.4714	0.000135367	91.401	58.197	82.663	0	0	0	0	0	0	4872300	0	0	4974200	0	0	8008700	7966500	0	0	0	6370700	0	0
AT1G51850.1	AT1G51850.1	Leucine-rich repeat protein kinase family protein	0.464329	S	524	0.510758	0.00155163	64.203	46.379	49.559	0	0	0	0	0	0	0	0	0	0	0	0	0	0	0	0	0	0	0	0
AT1G51850.1	AT1G51850.1	Leucine-rich repeat protein kinase family protein	0.374839	S	529	0	0.00155163	64.203	46.379	64.203	0	0	0	0	0	0	0	0	0	0	0	0	0	0	0	0	0	0	0	0
AT1G51850.1	AT1G51850.1	Leucine-rich repeat protein kinase family protein	0.81787	S	533	9.70784	0.00216059	60.278	33.243	48.641	12690000	0	0	0	0	0	20745000	0	0	9958700	0	0	0	0	0	20134000	0	0	0	0
AT1G52080.1	AT1G52080.1	actin binding protein family	0.999994	S	83	52.4382	1.07471e-05	89.629	73.492	89.629	1974600	1755700	1783500	2823200	2376300	1647600	2960900	0	0	0	948210	2654900	1905900	1517300	0	0	0	1487800	0	0
AT1G52200.1	AT1G52200.1	PLAC8 family protein	1	T	23	68.6006	2.68567e-06	86.577	75.266	86.577	15802000	0	23804000	28850000	0	20068000	13111000	0	0	0	0	35863000	26702000	0	20410000	18374000	0	0	0	23543000
AT1G52320.4	AT1G52320.4	unknown protein; FUNCTIONS IN: molecular_function unknown; INVOLVED IN: N-terminal protein myristoylation; LOCATED IN: plasma membrane; EXPRESSED IN: 23 plant structures; EXPRESSED DURING: 14 growth stages; CONTAINS InterPro DOMAIN/s: Protein of unknown f	0.5	S	289	0	0.00263786	60.434	40.672	60.434	0	0	0	0	0	0	0	0	0	0	0	0	0	0	0	0	0	0	3446500	0
AT1G52320.4	AT1G52320.4	unknown protein; FUNCTIONS IN: molecular_function unknown; INVOLVED IN: N-terminal protein myristoylation; LOCATED IN: plasma membrane; EXPRESSED IN: 23 plant structures; EXPRESSED DURING: 14 growth stages; CONTAINS InterPro DOMAIN/s: Protein of unknown f	0.968017	S	290	14.8096	1.88614e-05	103.14	66.025	83.087	10790000	7359400	9604200	19635000	11847000	14483000	10407000	6930200	11845000	9637200	8356500	14154000	15297000	10302000	8853000	8735700	4212800	11471000	3446500	10197000
AT1G52380.1	AT1G52380.1	NUP50 (Nucleoporin 50 kDa) protein	0.999813	S	33	37.9442	1.60917e-63	219.06	184.67	182.22	9671100	5970200	8463200	10765000	10193000	11692000	5031500	3940500	7377500	4788800	4993200	9291500	9503600	6398300	5934200	8895000	2344500	9041300	2049900	7170300
AT1G52380.1	AT1G52380.1	NUP50 (Nucleoporin 50 kDa) protein	1	S	114	81.7858	1.06581e-86	228.36	199.94	141.21	122290000	96483000	108980000	231460000	171470000	201170000	119190000	77482000	115790000	79735000	68035000	147540000	181340000	121460000	142000000	142100000	48399000	169150000	33097000	145490000
AT1G52380.1	AT1G52380.1	NUP50 (Nucleoporin 50 kDa) protein	0.999793	S	434	36.8305	6.70499e-61	214.24	198.35	214.24	52699000	60091000	44645000	101300000	72318000	74872000	51680000	34695000	52400000	37570000	35891000	69409000	72760000	48254000	52825000	60543000	17234000	72548000	20590000	48286000
AT1G52380.1	AT1G52380.1	NUP50 (Nucleoporin 50 kDa) protein	1	T	430	84.2815	6.70499e-61	214.24	198.35	181.36	55297000	61653000	50373000	101300000	72318000	79266000	54876000	39537000	54610000	40398000	38439000	73287000	77686000	54671000	54851000	60543000	22172000	81241000	22146000	54692000
AT1G52780.1	AT1G52780.1	Protein of unknown function (DUF2921)	0.999994	S	1041	52.4683	2.40147e-13	128.54	111.6	128.54	13570000	15579000	10076000	14381000	0	12547000	18386000	0	9845600	12262000	8150600	14013000	20715000	13302000	10588000	13887000	3455600	14543000	6338700	12443000
AT1G53050.1	AT1G53050.1	Protein kinase superfamily protein	0.532161	S	635	0.559649	0.00540586	48.314	22.448	48.314	0	1402300	0	0	0	0	0	2260000	2781200	2229000	2169400	0	4382100	0	3270700	0	757200	0	790310	0
AT1G53050.1	AT1G53050.1	Protein kinase superfamily protein	0.737873	S	14	4.49469	5.41027e-06	105.9	74.809	79.013	0	0	0	0	7399200	0	0	0	0	7572500	0	20824000	13197000	0	8048700	0	0	0	0	13037000
AT1G53050.1	AT1G53050.1	Protein kinase superfamily protein	0.992624	S	17	21.2896	3.48801e-07	120.31	98.777	120.31	16870000	5939400	17538000	12202000	0	14291000	6567600	10953000	15046000	0	6172200	0	0	15448000	0	11762000	5502300	16291000	0	0
AT1G53165.2	AT1G53165.2	Protein kinase superfamily protein ; Protein kinase superfamily protein ; Protein kinase superfamily protein	0.551891	S	653	0.905656	0.000211845	70.622	55.361	70.622	9605100	0	0	0	0	0	0	0	0	0	0	0	0	0	0	0	0	0	0	0
AT1G53165.2	AT1G53165.2	Protein kinase superfamily protein ; Protein kinase superfamily protein ; Protein kinase superfamily protein	0.741193	S	479	7.60818	0.00123976	59.862	42.373	59.862	4324900	4289900	2749600	0	0	0	0	3692600	2332800	3167100	4124100	5637600	3306600	0	0	3698700	904050	0	1294500	3421400
AT1G53300.1	AT1G53300.1	tetratricopetide-repeat thioredoxin-like 1	0.968496	S	39	14.8773	3.59868e-18	149.23	98.166	60.157	4149200	0	0	13057000	0	0	0	0	0	0	0	0	0	0	0	0	0	0	0	0
AT1G53300.1	AT1G53300.1	tetratricopetide-repeat thioredoxin-like 1	0.999991	S	42	50.3649	8.07152e-25	166.6	123.09	166.6	9618700	5576000	6734700	0	10067000	10574000	5612300	3379800	7937800	7453800	5273100	10419000	10026000	8810400	7515100	7188300	2841700	7147100	1632800	6407100
AT1G53310.3	AT1G53310.3	phosphoenolpyruvate carboxylase 1 ; phosphoenolpyruvate carboxylase 1 ; phosphoenolpyruvate carboxylase 1	1	S	11	61.6499	2.80505e-05	79.974	66.395	61.65	66761000	67762000	63168000	216080000	105760000	89155000	89611000	40902000	57377000	91750000	96672000	147470000	129530000	83439000	84282000	121840000	26702000	99557000	44802000	77998000
AT1G53430.2	AT1G53430.2	Leucine-rich repeat transmembrane protein kinase ; Leucine-rich repeat transmembrane protein kinase	0.971865	S	787	15.3909	2.77214e-06	97.45	56.049	87.566	5465900	4917800	5051600	6999100	5436000	4449300	4467000	3373600	4478400	0	3625400	7813800	7072200	4909300	4092200	5503800	1626500	5119000	1636800	3575500
AT1G53470.1	AT1G53470.1	mechanosensitive channel of small conductance-like 4	0.65208	S	462	3.1815	3.70225e-09	101.39	74.856	76.073	0	0	0	0	0	29071000	0	0	6734300	0	0	0	4750700	0	0	0	0	0	0	0
AT1G53470.1	AT1G53470.1	mechanosensitive channel of small conductance-like 4	0.989694	S	463	20.4942	1.01997e-17	133.98	116.77	124.47	31453000	21374000	16289000	33085000	21967000	18257000	13551000	12691000	22209000	17920000	12132000	29839000	22120000	32437000	24243000	25599000	7679600	27556000	5780100	22455000
AT1G53470.1	AT1G53470.1	mechanosensitive channel of small conductance-like 4	0.981766	S	471	17.3976	0.000180925	77.506	58.374	76.378	4811800	1230700	3890300	6871900	4953200	5010000	5473900	3407900	3117800	3251800	1965700	6189400	4750700	4636200	2873300	3614300	1583800	4242600	0	3756200
AT1G53470.1	AT1G53470.1	mechanosensitive channel of small conductance-like 4	0.999925	S	209	41.2419	0.0163338	41.242	32.71	41.242	9539200	8003200	0	14556000	9234100	12878000	5972400	0	0	0	6050700	10575000	10715000	7198500	8727000	8477400	3436800	0	1696100	9539200
AT1G53470.1	AT1G53470.1	mechanosensitive channel of small conductance-like 4	0.998571	S	484	28.4435	0.00564112	55.314	36.22	41.399	0	0	0	0	0	0	0	0	0	0	0	0	0	0	0	0	0	0	0	0
AT1G53470.1	AT1G53470.1	mechanosensitive channel of small conductance-like 4	0.996618	S	153	24.8499	3.78361e-09	91.269	77.527	91.269	0	0	0	0	0	5102200	0	0	0	0	0	0	0	0	19536000	0	0	0	0	0
AT1G53470.1	AT1G53470.1	mechanosensitive channel of small conductance-like 4	0.996618	S	154	24.8499	3.78361e-09	91.269	77.527	91.269	0	0	0	0	0	5102200	0	0	0	0	0	0	0	0	19536000	0	0	0	0	0
AT1G53500.1	AT1G53500.1	NAD-dependent epimerase/dehydratase family protein	0.995804	T	371	23.8656	2.16305e-19	164.11	138.64	164.11	6493100	3975400	3013700	3759700	3294200	4223200	6909700	2304200	2240100	4913600	2107900	3874200	2909700	2034500	2095900	3596400	774540	2160500	1348200	1871600
AT1G53510.1	AT1G53510.1	mitogen-activated protein kinase 18	0.969998	Y	189	15.1925	0.00735782	59.281	44.668	59.281	0	0	610460	1056200	662940	772040	352070	0	235530	0	0	0	0	0	608750	1797500	0	770850	0	276300
AT1G53510.1	AT1G53510.1	mitogen-activated protein kinase 18	0.99388	T	187	25.4457	0.00735782	59.281	44.668	59.281	0	0	610460	1056200	662940	772040	352070	0	235530	0	0	0	0	0	608750	1797500	0	770850	0	276300
AT1G53570.5	AT1G53570.5	mitogen-activated protein kinase kinase kinase 3 ; mitogen-activated protein kinase kinase kinase 3 ; mitogen-activated protein kinase kinase kinase 3 ; mitogen-activated protein kinase kinase kinase 3 ; mitogen-activated protein kinase kinase kinase 3	0.939821	S	151	12.2969	0.00316168	62.732	39.357	54.772	0	18538000	0	0	0	0	0	14275000	27206000	0	0	26738000	0	19926000	0	0	0	0	0	20008000
AT1G53570.5	AT1G53570.5	mitogen-activated protein kinase kinase kinase 3 ; mitogen-activated protein kinase kinase kinase 3 ; mitogen-activated protein kinase kinase kinase 3 ; mitogen-activated protein kinase kinase kinase 3 ; mitogen-activated protein kinase kinase kinase 3	1	S	134	52.5549	5.42694e-10	127.79	113.44	52.555	13029000	6773200	9284600	19450000	18033000	13337000	12786000	7929900	10113000	9519000	11153000	16293000	20080000	12124000	13923000	11303000	4417600	14801000	4676500	10807000
AT1G53570.5	AT1G53570.5	mitogen-activated protein kinase kinase kinase 3 ; mitogen-activated protein kinase kinase kinase 3 ; mitogen-activated protein kinase kinase kinase 3 ; mitogen-activated protein kinase kinase kinase 3 ; mitogen-activated protein kinase kinase kinase 3	0.927724	T	39	11.0843	1.87237e-05	96.015	79.344	95.651	3566200	2353500	0	4747800	2850700	0	0	2033300	2596600	3603600	2282400	4054600	0	3966900	2599400	3489300	1186600	4283800	0	3264400
AT1G53570.5	AT1G53570.5	mitogen-activated protein kinase kinase kinase 3 ; mitogen-activated protein kinase kinase kinase 3 ; mitogen-activated protein kinase kinase kinase 3 ; mitogen-activated protein kinase kinase kinase 3 ; mitogen-activated protein kinase kinase kinase 3	0.618016	T	41	2.08955	2.63792e-05	89.013	63.074	73.067	0	0	0	0	0	2503100	2326200	0	0	0	0	0	4130300	0	0	0	0	0	1544000	0
AT1G53590.1	AT1G53590.1	Calcium-dependent lipid-binding (CaLB domain) family protein	0.389074	S	539	2.81165	0.00824011	45.434	35.646	40.237	0	0	0	0	0	0	0	0	0	0	0	0	0	0	0	0	0	0	0	0
AT1G53590.1	AT1G53590.1	Calcium-dependent lipid-binding (CaLB domain) family protein	0.398319	S	544	1.29173	0.000572295	68.944	58.618	68.257	0	0	0	0	0	0	0	0	0	0	0	0	0	0	0	0	0	0	0	0
AT1G53590.1	AT1G53590.1	Calcium-dependent lipid-binding (CaLB domain) family protein	0.583553	S	546	1.73283	4.02364e-05	89.866	81.524	89.866	0	2409900	0	591460	0	0	0	0	0	0	0	0	0	0	0	0	0	0	0	0
AT1G53590.1	AT1G53590.1	Calcium-dependent lipid-binding (CaLB domain) family protein	0.999899	S	548	39.97	5.50883e-38	189.84	173.18	174.53	7464100	6473100	6455000	8924900	7982500	10881000	17341000	6493100	8470500	7304200	9167300	11471000	13608000	7909400	5182300	10106000	0	8615800	0	7116800
AT1G53590.1	AT1G53590.1	Calcium-dependent lipid-binding (CaLB domain) family protein	1	S	483	45.368	0.00461579	45.368	32.791	45.368	0	21553000	0	17800000	0	19181000	0	9080100	17719000	0	10820000	0	19680000	0	10683000	0	0	17417000	9340900	9638600
AT1G53590.1	AT1G53590.1	Calcium-dependent lipid-binding (CaLB domain) family protein	0.999937	S	579	41.9809	6.39381e-05	78.326	59.055	78.326	0	0	0	0	0	0	0	0	0	0	0	0	0	0	0	0	0	0	0	0
AT1G53720.1	AT1G53720.1	cyclophilin 59	1	S	180	117.199	6.09376e-28	147.36	138.15	125.97	9480500	6462000	0	47893000	20347000	16155000	26619000	9111300	9653400	13668000	10971000	29785000	24375000	28663000	13556000	26979000	2614700	22570000	0	11085000
AT1G53730.1	AT1G53730.1	STRUBBELIG-receptor family 6 ; STRUBBELIG-receptor family 6	1	S	377	75.3658	1.23254e-06	102.65	70.497	89.827	15719000	7650300	7681800	18627000	11953000	12131000	17957000	9980800	13570000	8189500	9161400	16887000	11665000	11900000	12232000	11554000	5527200	12195000	7799200	12520000
AT1G53730.1	AT1G53730.1	STRUBBELIG-receptor family 6 ; STRUBBELIG-receptor family 6	0.53216	S	383	0.538609	0.00371924	57.525	38.568	51.147	6645500	1975100	4156700	10007000	6393700	8304200	3803000	2889700	4384700	0	2751700	8272300	0	7754300	3788700	4896400	0	8807500	0	4428800
AT1G53730.1	AT1G53730.1	STRUBBELIG-receptor family 6 ; STRUBBELIG-receptor family 6	0.580594	T	384	1.40542	0.00371924	57.525	38.568	51.798	6645500	1975100	4156700	10007000	6393700	8304200	3803000	2889700	4384700	0	2751700	0	10536000	7754300	3788700	4896400	0	8807500	0	4428800
AT1G53750.1	AT1G53750.1	regulatory particle triple-A 1A	0.99991	S	96	40.4666	5.15411e-06	96.229	86.225	82.171	6821300	6449300	7637600	8447500	6461400	6790900	6666800	4651400	6471400	5312600	5077400	8271200	7306800	5834300	5724200	6824300	3594400	8094600	0	5240900
AT1G54080.1	AT1G54080.1	oligouridylate-binding protein 1A ; oligouridylate-binding protein 1A	0.960858	S	236	13.9004	4.04941e-20	162.76	148.75	132.4	39677000	28712000	61004000	54771000	27153000	43980000	37343000	29514000	33554000	23755000	20520000	33097000	36727000	47508000	30717000	31579000	21601000	37650000	26161000	39197000
AT1G54080.1	AT1G54080.1	oligouridylate-binding protein 1A ; oligouridylate-binding protein 1A	0.60813	S	237	1.90855	9.11149e-06	93.226	84.496	93.226	52398000	41205000	76225000	0	36074000	55385000	45003000	0	48899000	37537000	0	58321000	50392000	59507000	0	0	0	2200000	47648000	0
AT1G54270.2	AT1G54270.2	eif4a-2 ; eif4a-2	1	S	4	76.2808	9.98344e-09	125.97	107.01	115.91	22421000	15965000	15319000	31028000	23803000	25960000	21378000	11644000	15742000	16203000	13838000	24761000	26795000	16753000	18299000	22239000	0	22165000	8088100	16302000
AT1G54270.2;AT3G13920.4	AT3G13920.4	eif4a-2 ; eif4a-2 ; eukaryotic translation initiation factor 4A1 ; eukaryotic translation initiation factor 4A1 ; eukaryotic translation initiation factor 4A1 ; eukaryotic translation initiation factor 4A1	0.988435	S	141	19.318	2.41769e-08	129.16	103.44	129.16	3313800	0	0	4736800	9486500	3669500	5760000	1054600	985550	1796300	1326500	3193100	3953600	3094600	983030	0	0	2020400	1049800	873880
AT1G54270.2;AT3G13920.4	AT3G13920.4	eif4a-2 ; eif4a-2 ; eukaryotic translation initiation factor 4A1 ; eukaryotic translation initiation factor 4A1 ; eukaryotic translation initiation factor 4A1 ; eukaryotic translation initiation factor 4A1	0.989873	T	140	19.9008	2.89357e-36	172.51	166.48	113.72	1677400000	597490000	829130000	905290000	1640800000	1140000000	1380200000	611120000	694300000	529410000	584690000	1092900000	2258900000	1025800000	224360000	1037700000	107160000	1055100000	630490000	593880000
AT1G54610.3	AT1G54610.3	Protein kinase superfamily protein ; Protein kinase superfamily protein ; Protein kinase superfamily protein	0.288326	S	525	0	0.0101605	48.214	38.292	48.214	0	0	0	0	0	0	0	0	0	0	0	0	0	0	0	0	0	0	0	0
AT1G54610.3	AT1G54610.3	Protein kinase superfamily protein ; Protein kinase superfamily protein ; Protein kinase superfamily protein	0.490605	S	526	1.54842	0.000157054	84.41	75.402	49.188	0	0	0	0	0	0	0	0	0	0	0	0	0	0	0	0	0	0	0	0
AT1G54610.3	AT1G54610.3	Protein kinase superfamily protein ; Protein kinase superfamily protein ; Protein kinase superfamily protein	0.441232	S	527	0	0.000157054	84.41	75.402	84.41	0	0	0	0	0	0	0	0	0	0	0	0	0	0	0	0	0	0	0	0
AT1G54710.1	AT1G54710.1	homolog of yeast autophagy 18 (ATG18) H	0.3333	S	340	0	0.00629869	48.704	36.558	48.704	0	0	0	0	0	0	0	0	0	0	0	0	0	0	0	0	0	0	0	0
AT1G54710.1	AT1G54710.1	homolog of yeast autophagy 18 (ATG18) H	0.594007	S	341	1.70053	0.000144612	78.078	51.297	78.078	21244000	0	0	0	26250000	0	0	0	0	0	16167000	0	0	21802000	0	0	0	0	11873000	0
AT1G54710.1	AT1G54710.1	homolog of yeast autophagy 18 (ATG18) H	0.788797	S	342	5.77248	2.33828e-06	117.78	82.073	117.78	0	16737000	0	31544000	0	26947000	26167000	14203000	27410000	0	0	0	21664000	0	24704000	16291000	0	26975000	0	0
AT1G54710.1	AT1G54710.1	homolog of yeast autophagy 18 (ATG18) H	0.946109	S	657	14.0232	5.10261e-76	226.39	202.45	207.79	7211300	7192300	0	0	6417000	0	11546000	5731900	6904900	0	6638000	10348000	8167000	7957500	0	0	0	9664800	0	0
AT1G54710.1	AT1G54710.1	homolog of yeast autophagy 18 (ATG18) H	0.718585	T	656	5.33124	3.65602e-13	149	134.32	149	34399000	17178000	6319300	57627000	19982000	38843000	26517000	0	36992000	20906000	25404000	38940000	24611000	34356000	42376000	24402000	18123000	42916000	9280400	40846000
AT1G54920.1	AT1G54920.1	unknown protein; FUNCTIONS IN: molecular_function unknown; INVOLVED IN: biological_process unknown; LOCATED IN: membrane; EXPRESSED IN: 23 plant structures; EXPRESSED DURING: 15 growth stages; Has 30201 Blast hits to 17322 proteins in 780 species: Archae	0.976969	S	422	16.4411	0.00234489	56.359	35.502	56.359	923050	733880	0	3165600	986820	0	1330800	395040	651800	827250	637410	1125000	900550	1025400	751530	3088500	0	1299200	124450	788380
AT1G54920.1	AT1G54920.1	unknown protein; FUNCTIONS IN: molecular_function unknown; INVOLVED IN: biological_process unknown; LOCATED IN: membrane; EXPRESSED IN: 23 plant structures; EXPRESSED DURING: 15 growth stages; Has 30201 Blast hits to 17322 proteins in 780 species: Archae	0.99706	S	325	28.3197	4.12248e-29	171.76	124.88	132.08	0	14369000	7654600	14624000	12248000	11596000	0	8482700	12542000	14892000	10597000	0	0	13218000	9135700	0	3480000	11722000	4924000	11575000
AT1G55040.1	AT1G55040.1	zinc finger (Ran-binding) family protein	0.968583	S	757	16.5644	0.0129549	54.974	41.311	41.491	9276300	8110900	10187000	16169000	11968000	12563000	7106800	4502200	10983000	5005800	6380000	12086000	12248000	9673100	9437800	8780700	1479000	10439000	1553500	4748100
AT1G55040.1	AT1G55040.1	zinc finger (Ran-binding) family protein	0.496643	S	562	0	0.0149314	40.756	23.161	40.369	0	0	0	0	0	0	0	0	0	0	0	0	0	0	0	0	0	0	0	0
AT1G55040.1	AT1G55040.1	zinc finger (Ran-binding) family protein	0.999999	S	566	62.1368	8.14704e-77	236.27	216.61	185.28	9172000	7181800	9194300	12107000	9933500	12011000	7064700	5247600	8508400	5932800	5897700	8705600	7569000	6657200	7927800	7440100	1948200	7841800	2470400	6474500
AT1G55150.1	AT1G55150.1	DEA(D/H)-box RNA helicase family protein	1	S	47	76.683	6.64491e-16	145.34	130.18	145.34	3485600	10263000	5096100	23003000	22789000	2643400	9341900	1515700	5094600	7667900	9952600	7399500	0	6073600	18758000	0	2036500	4939200	2034800	6103300
AT1G55535.2	AT1G55535.2	unknown protein; FUNCTIONS IN: molecular_function unknown; INVOLVED IN: biological_process unknown; LOCATED IN: cellular_component unknown; EXPRESSED IN: cultured cell; BEST Arabidopsis thaliana protein match is: unknown protein (TAIR:AT3G13420.1); Has 35	0.999941	S	237	42.2753	0.000362909	67.169	18.608	67.169	3671700	3986800	3152800	8896300	0	0	0	0	0	0	0	0	0	0	0	0	0	0	2148800	0
AT1G55860.2	AT1G55860.2	ubiquitin-protein ligase 1 ; ubiquitin-protein ligase 1	0.219974	S	899	0.910032	0.00233462	46.399	36.771	46.399	0	0	0	0	0	0	0	0	0	0	0	0	0	0	0	0	0	0	0	0
AT1G55860.2;AT1G70320.1	AT1G70320.1	ubiquitin-protein ligase 1 ; ubiquitin-protein ligase 1 ; ubiquitin-protein ligase 2	0.359702	S	989	0	4.73693e-05	64.767	52.212	64.767	0	0	0	0	0	0	0	0	0	0	0	0	0	0	0	0	0	0	0	0
AT1G55860.2;AT1G70320.1	AT1G70320.1	ubiquitin-protein ligase 1 ; ubiquitin-protein ligase 1 ; ubiquitin-protein ligase 2	0.359702	S	990	0	4.73693e-05	64.767	52.212	64.767	0	0	0	0	0	0	0	0	0	0	0	0	0	0	0	0	0	0	0	0
AT1G55860.2;AT1G70320.1	AT1G70320.1	ubiquitin-protein ligase 1 ; ubiquitin-protein ligase 1 ; ubiquitin-protein ligase 2	0.874785	S	1703	8.48273	1.2983e-21	159.06	144.7	67.995	7260200	7694800	8068300	1752300	11779000	0	8168900	0	0	8582600	4351200	5966100	10825000	0	6877600	8766900	0	7126200	0	3946100
AT1G55860.2;AT1G70320.1	AT1G70320.1	ubiquitin-protein ligase 1 ; ubiquitin-protein ligase 1 ; ubiquitin-protein ligase 2	0.988531	S	1705	19.5887	1.2983e-21	159.06	144.7	133.48	6747500	8909600	8839400	16217000	14094000	9813100	10255000	8004800	9174600	12295000	0	9304000	14068000	11755000	10598000	15804000	4154500	10947000	0	10785000
AT1G56070.1	AT1G56070.1	Ribosomal protein S5/Elongation factor G/III/V family protein	0.995177	S	837	23.1462	0.000934363	62.162	49.601	62.162	958630	833570	761790	1850000	1221500	1359600	1085300	0	627810	568980	603540	1180300	1537300	1157300	721970	2206900	288380	1331900	223350	749570
AT1G56080.1	AT1G56080.1	unknown protein; FUNCTIONS IN: molecular_function unknown; INVOLVED IN: biological_process unknown; LOCATED IN: plasma membrane; EXPRESSED IN: 12 plant structures; EXPRESSED DURING: 6 growth stages; BEST Arabidopsis thaliana protein match is: unknown prot	1	S	204	82.0823	1.76519e-05	117.26	95.66	117.26	2936600	2409500	2946600	4678000	3446100	4443400	2808800	2197900	3147400	2730900	2594900	4246900	3872900	1899800	2740900	3754500	524330	2808500	776800	1301700
AT1G56080.1	AT1G56080.1	unknown protein; FUNCTIONS IN: molecular_function unknown; INVOLVED IN: biological_process unknown; LOCATED IN: plasma membrane; EXPRESSED IN: 12 plant structures; EXPRESSED DURING: 6 growth stages; BEST Arabidopsis thaliana protein match is: unknown prot	0.999884	S	208	40.2515	3.5711e-48	199.65	166.44	199.65	21037000	16240000	17893000	35981000	25521000	26296000	18528000	14120000	17751000	20597000	15881000	25828000	20711000	19534000	21456000	18910000	5492100	16744000	9219100	15694000
AT1G56080.1	AT1G56080.1	unknown protein; FUNCTIONS IN: molecular_function unknown; INVOLVED IN: biological_process unknown; LOCATED IN: plasma membrane; EXPRESSED IN: 12 plant structures; EXPRESSED DURING: 6 growth stages; BEST Arabidopsis thaliana protein match is: unknown prot	0.996467	S	231	25.4019	0.000135956	83.204	69.046	83.204	3129900	0	2568000	0	3456100	5018800	6047200	2311900	1992500	0	1548400	3372700	3828000	2531800	1323800	0	0	2769900	1358900	2811100
AT1G56110.1	AT1G56110.1	homolog of nucleolar protein NOP56	1	S	469	68.0237	0.000868516	68.024	51.901	68.024	14803000	0	12807000	23425000	0	19887000	0	7397400	0	8010800	5023600	19992000	18975000	14025000	9664900	9662200	3506100	16762000	2015100	11976000
AT1G56110.1	AT1G56110.1	homolog of nucleolar protein NOP56	1	S	444	45.6082	6.50826e-05	107.11	86.328	45.608	24737000	9903900	14622000	26608000	19991000	20245000	8876200	14644000	22855000	7517600	10138000	28646000	16622000	17463000	14642000	15836000	5689200	22331000	4299100	10770000
AT1G56140.1	AT1G56140.1	Leucine-rich repeat transmembrane protein kinase	0.524504	S	1001	1.26842	0.00268535	56.482	42.062	56.482	0	0	0	0	0	0	0	0	0	0	0	0	0	1544900	0	0	0	0	0	0
AT1G56140.1	AT1G56140.1	Leucine-rich repeat transmembrane protein kinase	0.456193	S	1003	0	0.000783179	64.394	48.822	46.964	0	0	0	0	0	0	0	0	0	0	0	0	0	0	0	0	0	0	0	0
AT1G56140.1	AT1G56140.1	Leucine-rich repeat transmembrane protein kinase	0.331059	S	1006	0	0.000783179	64.394	48.822	64.394	0	0	0	0	0	0	0	0	0	0	0	0	0	0	0	0	0	0	0	0
AT1G56140.1	AT1G56140.1	Leucine-rich repeat transmembrane protein kinase	0.331059	T	1005	0	0.000783179	64.394	48.822	64.394	0	0	0	0	0	0	0	0	0	0	0	0	0	0	0	0	0	0	0	0
AT1G56230.2	AT1G56230.2	Protein of unknown function (DUF1399) ; Protein of unknown function (DUF1399)	0.999868	S	18	38.8056	6.11459e-11	123.95	85.074	122.42	6773000	6959000	6521600	11649000	8610900	9099400	8930200	5636900	7425200	6733900	6439900	7120800	9562900	6517900	6346000	12813000	2355700	8082900	2822700	5770400
AT1G56230.2	AT1G56230.2	Protein of unknown function (DUF1399) ; Protein of unknown function (DUF1399)	1	S	21	82.04	4.33109e-07	108.71	83.778	108.71	2552200	2913700	1747000	3847700	3327700	2459200	3469700	1241300	1817200	1193000	1945700	3019500	2354900	1952700	2236900	3659100	557610	2314200	568870	1810400
AT1G56290.1	AT1G56290.1	CwfJ-like family protein	0.999984	S	96	48.2376	1.52759e-05	90.37	79.118	83.788	6179400	3599900	3567800	9865800	8689100	8198000	5166400	4148400	7045900	5572300	0	8200400	5930900	7070400	3117900	6282100	1577600	6708700	1322700	2770800
AT1G56290.1	AT1G56290.1	CwfJ-like family protein	0.999827	S	303	37.4606	0.0108329	53.754	40.175	51.463	0	1455600	979060	4592500	3295700	3887000	1729400	0	1536700	0	0	3296600	2318700	1886100	3907700	3729900	0	2113300	0	1601500
AT1G56290.1	AT1G56290.1	CwfJ-like family protein	0.964428	S	305	14.3293	0.00344594	53.754	40.175	53.754	4475100	5915800	4283200	10193000	3295700	3887000	1729400	0	1536700	0	2536800	3296600	2318700	1886100	3907700	3729900	2132000	2113300	0	1601500
AT1G56450.1	AT1G56450.1	20S proteasome beta subunit G1	1	S	245	102.905	4.56572e-38	191.95	174.47	191.95	0	3265600	0	11841000	7782100	0	6913800	0	3075600	3073000	3004100	8050700	8100800	0	3738000	15084000	0	5396700	349210	2582800
AT1G56460.1	AT1G56460.1	HIT zinc finger ;PAPA-1-like conserved region ; HIT zinc finger ;PAPA-1-like conserved region	0.999749	S	303	35.9975	0.000795172	53.867	46.914	53.867	0	3003000	0	0	3571400	5171700	0	0	0	0	2368700	0	0	0	0	4926000	0	0	0	2592100
AT1G56500.1	AT1G56500.1	haloacid dehalogenase-like hydrolase family protein	0.776037	Y	670	8.41002	0.015415	45.257	12.2	45.257	0	0	0	1646500	0	0	4252600	0	0	4790800	0	0	4436600	0	0	0	0	0	0	1695800
AT1G57680.2	AT1G57680.2	FUNCTIONS IN: molecular_function unknown; INVOLVED IN: biological_process unknown; LOCATED IN: endomembrane system; EXPRESSED IN: 24 plant structures; EXPRESSED DURING: 15 growth stages; CONTAINS InterPro DOMAIN/s: Uncharacterised conserved protein UCP031	0.537784	T	331	2.48381	0.000339417	72.819	28.52	72.819	86943	0	376870	629850	0	0	1483500	617380	1696100	1833900	1727500	1861000	0	2339500	736310	7900100	1119300	2573400	0	0
AT1G57700.1	AT1G57700.1	Protein kinase superfamily protein	0.999975	S	61	46.0863	1.54094e-20	161.21	133.19	161.21	2593300	0	3309700	0	0	6062200	2039200	961310	4264400	2511200	0	0	5115800	2943400	1569800	13011000	0	3939400	526690	2162500
AT1G57700.1	AT1G57700.1	Protein kinase superfamily protein	0.5	T	59	0	0.000889481	62.237	46.731	41.521	2593300	0	3309700	0	0	6062200	2039200	961310	4264400	2511200	0	0	5115800	2943400	1569800	13011000	0	3939400	526690	2162500
AT1G57990.1	AT1G57990.1	purine permease 18	1	S	25	120.273	2.81068e-77	233.31	212.27	211.89	11352000	11514000	9092100	11426000	7523000	9438000	9793900	8264700	11463000	7158700	8521400	13504000	11600000	7997000	8225600	9653000	3569500	7561000	3741000	6371700
AT1G58025.1	AT1G58025.1	DNA-binding bromodomain-containing protein ; DNA-binding bromodomain-containing protein ; DNA-binding bromodomain-containing protein	0.99842	S	59	28.0066	6.26415e-05	75.326	61.699	75.326	0	0	325260	789360	0	1429300	0	261570	448920	587680	284050	1056600	668650	679230	473010	3910200	0	0	106390	527560
AT1G58025.1	AT1G58025.1	DNA-binding bromodomain-containing protein ; DNA-binding bromodomain-containing protein ; DNA-binding bromodomain-containing protein	0.986712	S	415	18.7072	5.19141e-24	155.98	127.77	153.39	17520000	14442000	11327000	27408000	17880000	21426000	13891000	8885600	15540000	9130100	8625300	18550000	14156000	14939000	11631000	15451000	5541000	18729000	4621700	10729000
AT1G58250.1	AT1G58250.1	Golgi-body localisation protein domain ;RNA pol II promoter Fmp27 protein domain ; Golgi-body localisation protein domain ;RNA pol II promoter Fmp27 protein domain	0.990568	S	2473	23.0144	1.9518e-07	82.492	74.206	61.526	0	2367800	3355900	0	0	5467800	0	0	0	0	3009300	6913300	4048400	0	0	5123100	1044600	7953600	545920	0
AT1G58250.1	AT1G58250.1	Golgi-body localisation protein domain ;RNA pol II promoter Fmp27 protein domain ; Golgi-body localisation protein domain ;RNA pol II promoter Fmp27 protein domain	1	S	1605	81.347	3.65035e-06	112.5	90.508	83.37	13532000	9015000	8487900	19174000	12262000	14797000	10160000	7434000	10414000	9870900	6028200	12051000	14099000	11586000	9922100	11391000	4251400	11244000	3906900	9024900
AT1G59359.1	AT1G59359.1	Ribosomal protein S5 family protein ; Ribosomal protein S5 family protein ; Ribosomal protein S5 family protein ; Ribosomal protein S5 family protein	0.594316	S	255	1.74121	4.40004e-05	103.13	78.651	79.81	0	0	0	0	0	0	16513000	0	0	0	15212000	0	0	0	0	19722000	0	0	8800700	0
AT1G59359.1	AT1G59359.1	Ribosomal protein S5 family protein ; Ribosomal protein S5 family protein ; Ribosomal protein S5 family protein ; Ribosomal protein S5 family protein	0.969512	S	257	15.0418	1.36377e-06	123.12	100.71	123.12	17928000	19185000	21446000	39139000	21954000	0	0	12685000	0	16214000	0	25856000	26945000	26531000	16928000	0	0	0	0	21544000
AT1G59610.1	AT1G59610.1	dynamin-like 3	0.827039	S	844	6.83573	4.49001e-62	220.78	202.82	192.16	25792000	34016000	13297000	34805000	22268000	23305000	49534000	15284000	20043000	20998000	15519000	41542000	26135000	16502000	15962000	16918000	5708000	18709000	10308000	16468000
AT1G59610.1	AT1G59610.1	dynamin-like 3	0.999786	S	533	36.703	3.28425e-09	134.93	123.14	134.93	299340000	204890000	208240000	317540000	254470000	256490000	224060000	155550000	215440000	199510000	191710000	332680000	248530000	208770000	206780000	265240000	81699000	280370000	106150000	196020000
AT1G59610.1	AT1G59610.1	dynamin-like 3	0.999184	S	883	30.892	1.37138e-07	107.47	95.022	93.269	13152000	5001600	7919500	16991000	10435000	12961000	15850000	6356200	11888000	6729800	11082000	8705300	11399000	0	9132600	12552000	2304300	18343000	8497800	17715000
AT1G59610.1	AT1G59610.1	dynamin-like 3	0.609697	T	902	1.93775	9.15904e-05	83.606	64.228	54.728	18390000	14706000	17122000	25129000	0	23331000	18532000	0	22877000	0	0	39707000	25973000	18323000	14137000	19346000	0	23592000	0	0
AT1G59610.1	AT1G59610.1	dynamin-like 3	0.876057	T	903	8.49504	0.00910877	52.061	35.965	51.301	0	0	0	0	17729000	0	0	16082000	0	22491000	0	0	0	0	0	0	0	0	0	0
AT1G59710.1	AT1G59710.1	Protein of unknown function (DUF569)	0.794644	S	196	6.94105	8.51913e-05	96.718	79.123	76.704	6053900	8168900	4501700	5900100	8372900	2763700	2565800	5184400	0	3793100	6033300	0	6506000	8758400	3846100	5452800	888550	0	2193700	3632200
AT1G59710.1	AT1G59710.1	Protein of unknown function (DUF569)	0.607455	S	199	4.42295	0.00333855	57.482	36.886	57.482	0	0	0	0	0	0	8616900	0	0	0	0	0	0	0	0	0	0	0	0	0
AT1G59710.1	AT1G59710.1	Protein of unknown function (DUF569)	1	S	204	64.9645	1.32042e-20	162.26	125.94	96.718	32981000	20490000	23179000	28548000	31090000	42501000	20888000	19198000	20526000	13951000	16822000	25955000	34834000	29933000	14911000	27486000	6628400	27760000	6742800	18449000
AT1G59710.1	AT1G59710.1	Protein of unknown function (DUF569)	0.469747	T	197	0	0.0055259	53.197	41.99	42.319	0	0	0	0	0	0	0	0	0	0	0	0	0	0	0	0	0	0	0	0
AT1G59820.1	AT1G59820.1	aminophospholipid ATPase 3	0.903809	T	24	9.72944	0.000396151	76.262	50.603	76.262	3122900	1940000	1442800	2591900	2581000	2687400	2080700	0	1772800	2062200	1984100	2289900	3187000	2226400	0	2634500	625400	1979600	762360	0
AT1G59870.1	AT1G59870.1	ABC-2 and Plant PDR ABC-type transporter family protein	0.778192	S	37	6.43336	1.05481e-32	180.28	149.1	153.39	25112000	10234000	15455000	0	0	0	0	0	0	0	0	0	27781000	0	0	17816000	0	0	0	20388000
AT1G59870.1	AT1G59870.1	ABC-2 and Plant PDR ABC-type transporter family protein	0.588263	S	38	2.52797	3.16414e-18	150.11	120.57	111.12	1863800	0	2286000	1066200	0	0	1107400	0	0	0	0	0	0	0	2117400	0	0	0	0	0
AT1G59870.1	AT1G59870.1	ABC-2 and Plant PDR ABC-type transporter family protein	0.833302	S	40	7.01179	5.82126e-32	171.21	127.62	171.21	0	0	0	0	0	0	0	14106000	0	0	18510000	0	0	0	0	0	0	24690000	0	0
AT1G59870.1	AT1G59870.1	ABC-2 and Plant PDR ABC-type transporter family protein	0.999996	S	45	54.2657	3.18364e-24	160.84	141.32	160.84	11192000	8315300	10862000	15775000	12297000	11417000	11014000	7318700	9113200	6479300	10200000	15750000	10746000	12172000	11757000	10126000	5130700	12806000	5937900	11413000
AT1G59870.1	AT1G59870.1	ABC-2 and Plant PDR ABC-type transporter family protein	0.965445	S	825	14.5621	0.000973708	58.37	31.066	58.37	0	0	0	0	0	304010	962450	0	0	0	1560500	0	0	8329000	901150	1488500	0	0	414320	0
AT1G59870.1	AT1G59870.1	ABC-2 and Plant PDR ABC-type transporter family protein	0.5	T	43	0	1.25559e-05	97.417	56.693	86.497	0	8315300	0	0	0	0	0	0	0	0	0	0	0	0	0	0	5130700	0	0	0
AT1G59890.4	AT1G59890.4	SIN3-like 5 ; SIN3-like 5 ; SIN3-like 5 ; SIN3-like 5	0.986085	S	721	18.0044	0.000166268	68.43	48.174	68.43	4384300	2560100	4061800	5170300	6145500	5883400	2761800	1947500	2147200	0	0	3977100	3823800	2460500	1496900	0	0	4650500	0	0
AT1G59890.4	AT1G59890.4	SIN3-like 5 ; SIN3-like 5 ; SIN3-like 5 ; SIN3-like 5	0.987455	S	725	18.1249	0.000206507	66.98	59.114	56.021	0	0	0	0	6145500	0	0	0	0	0	0	0	3823800	2460500	0	0	0	0	0	0
AT1G59890.4	AT1G59890.4	SIN3-like 5 ; SIN3-like 5 ; SIN3-like 5 ; SIN3-like 5	0.885773	T	723	8.83267	0.000166268	68.43	48.174	68.43	4384300	2560100	4061800	5170300	0	5883400	2761800	1947500	2147200	0	0	3977100	0	0	1496900	0	0	4650500	0	0
AT1G59900.1	AT1G59900.1	pyruvate dehydrogenase complex E1 alpha subunit ; Thiamin diphosphate-binding fold (THDP-binding) superfamily protein	0.981477	S	292	17.2955	4.41313e-06	107.37	77.117	74.147	47522000	41537000	30517000	57168000	0	41959000	93934000	33577000	33154000	40539000	22036000	61807000	35990000	37524000	10958000	48822000	11082000	49115000	0	21137000
AT1G59900.1	AT1G59900.1	pyruvate dehydrogenase complex E1 alpha subunit ; Thiamin diphosphate-binding fold (THDP-binding) superfamily protein	0.722681	S	294	4.24443	1.49058e-05	90.926	63.516	69.716	0	0	0	23765000	0	0	0	0	0	0	0	22663000	0	16335000	0	0	0	0	0	0
AT1G60140.1	AT1G60140.1	trehalose phosphate synthase	0.999999	S	5	60.6373	3.34937e-05	85.231	73.255	85.231	0	150970	116410	1038200	579990	367270	0	0	0	0	0	0	0	199160	0	996650	0	0	0	0
AT1G60200.1	AT1G60200.1	splicing factor PWI domain-containing protein / RNA recognition motif (RRM)-containing protein	0.989562	S	597	19.7684	1.62451e-136	275.43	238.85	266.4	32210000	53795000	44737000	85000000	61252000	62229000	66899000	22569000	46594000	40657000	38264000	64732000	68546000	46554000	42592000	46765000	11848000	60870000	15678000	48833000
AT1G60200.1	AT1G60200.1	splicing factor PWI domain-containing protein / RNA recognition motif (RRM)-containing protein	0.60131	S	417	6.88754	9.0682e-49	193.6	179.49	193.6	48246000	0	0	0	0	0	0	0	0	0	0	0	0	0	0	0	0	0	0	0
AT1G60200.1	AT1G60200.1	splicing factor PWI domain-containing protein / RNA recognition motif (RRM)-containing protein	0.384206	S	426	0	1.82149e-60	209.07	195.48	115.72	0	0	0	0	0	0	0	0	0	0	0	0	0	0	0	0	0	0	0	0
AT1G60200.1	AT1G60200.1	splicing factor PWI domain-containing protein / RNA recognition motif (RRM)-containing protein	0.689057	S	427	6.46737	3.24104e-163	288.2	272.39	257.94	0	0	0	95198000	58128000	79239000	0	0	0	0	0	89871000	0	0	55377000	54774000	0	0	0	0
AT1G60200.1	AT1G60200.1	splicing factor PWI domain-containing protein / RNA recognition motif (RRM)-containing protein	0.23277	T	416	0	6.81281e-05	63.979	56.175	63.979	0	0	0	0	0	0	0	0	0	0	0	0	0	0	0	0	0	0	0	0
AT1G60200.1	AT1G60200.1	splicing factor PWI domain-containing protein / RNA recognition motif (RRM)-containing protein	0.547689	T	425	2.70824	3.33771e-186	298.15	282.91	298.15	0	0	61515000	0	0	0	1943900	0	0	0	0	0	0	0	0	0	0	0	0	0
AT1G60780.1	AT1G60780.1	Clathrin adaptor complexes medium subunit family protein	0.496451	T	148	0	0.0102146	44.005	6.4223	44.005	0	0	0	0	0	0	0	0	0	0	0	0	0	0	0	0	0	0	0	0
AT1G60780.1	AT1G60780.1	Clathrin adaptor complexes medium subunit family protein	0.996135	T	156	25.3918	0.000167144	74.048	17.992	74.048	0	0	2723400	11381000	0	0	0	2725800	3743500	4158000	2163400	6543100	0	3852200	0	0	0	4729900	0	5330700
AT1G60940.2	AT1G60940.2	SNF1-related protein kinase 2.10 ; SNF1-related protein kinase 2.10	1	S	354	56.3592	0.00258168	56.359	30.973	56.359	3810800	1942200	0	0	2582900	0	2718600	3273600	4351900	0	2518400	4692000	0	3226300	3649300	0	0	0	1083100	0
AT1G61100.2	AT1G61100.2	disease resistance protein (TIR class), putative ; disease resistance protein (TIR class), putative	0.999999	S	598	58.3987	7.35323e-05	98.676	84.77	98.676	0	3313400	0	0	1518000	0	2463700	0	0	1929600	0	1373500	1849300	0	525310	0	0	0	1407200	0
AT1G61100.2	AT1G61100.2	disease resistance protein (TIR class), putative ; disease resistance protein (TIR class), putative	0.499998	S	573	0	4.22109e-05	76.588	58.131	76.588	0	813710	0	2105600	0	1359800	2515100	0	1132600	0	0	0	1993400	1058500	0	1920000	488360	1216400	0	0
AT1G61100.2	AT1G61100.2	disease resistance protein (TIR class), putative ; disease resistance protein (TIR class), putative	0.499998	S	575	0	4.22109e-05	76.588	58.131	76.588	0	813710	0	2105600	0	1359800	2515100	0	1132600	0	0	0	1993400	1058500	0	1920000	488360	1216400	0	0
AT1G61150.7	AT1G61150.7	LisH and RanBPM domains containing protein ; LisH and RanBPM domains containing protein ; LisH and RanBPM domains containing protein ; LisH and RanBPM domains containing protein ; LisH and RanBPM domains containing protein ; LisH and RanBPM domains contai	1	S	139	64.3869	0.00202555	69.188	35.828	69.188	133310000	90313000	102900000	239890000	166450000	217640000	123890000	43796000	91090000	53155000	104450000	106620000	122850000	97382000	105520000	73908000	0	111300000	22222000	0
AT1G61150.7	AT1G61150.7	LisH and RanBPM domains containing protein ; LisH and RanBPM domains containing protein ; LisH and RanBPM domains containing protein ; LisH and RanBPM domains containing protein ; LisH and RanBPM domains containing protein ; LisH and RanBPM domains contai	0.999998	S	148	57.0227	0.00202555	69.188	35.828	69.188	133310000	90313000	102900000	239890000	166450000	217640000	123890000	43796000	91090000	53155000	104450000	106620000	122850000	97382000	105520000	73908000	0	111300000	22222000	0
AT1G61150.7	AT1G61150.7	LisH and RanBPM domains containing protein ; LisH and RanBPM domains containing protein ; LisH and RanBPM domains containing protein ; LisH and RanBPM domains containing protein ; LisH and RanBPM domains containing protein ; LisH and RanBPM domains contai	1	T	137	64.3869	0.00202555	69.188	35.828	69.188	133310000	90313000	102900000	239890000	166450000	217640000	123890000	43796000	91090000	53155000	104450000	106620000	122850000	97382000	105520000	73908000	0	111300000	22222000	0
AT1G61150.7	AT1G61150.7	LisH and RanBPM domains containing protein ; LisH and RanBPM domains containing protein ; LisH and RanBPM domains containing protein ; LisH and RanBPM domains containing protein ; LisH and RanBPM domains containing protein ; LisH and RanBPM domains contai	0.999998	T	147	57.0227	0.00202555	69.188	35.828	69.188	133310000	90313000	102900000	239890000	166450000	217640000	123890000	43796000	91090000	53155000	104450000	106620000	122850000	97382000	105520000	73908000	0	111300000	22222000	0
AT1G61210.2	AT1G61210.2	Transducin/WD40 repeat-like superfamily protein ; Transducin/WD40 repeat-like superfamily protein	0.940916	S	490	12.0208	3.45235e-05	105.39	82.016	79.346	4086500	3893300	1788700	5927200	4361400	4873700	3853200	2601500	3185100	2995000	2312900	5087300	4271700	2653600	3282200	4271600	1346900	4712800	1826500	4667900
AT1G61560.4	AT1G61560.4	Seven transmembrane MLO family protein ; Seven transmembrane MLO family protein ; Seven transmembrane MLO family protein ; Seven transmembrane MLO family protein	0.999998	S	441	56.7488	6.5456e-07	107.65	78.742	107.65	2616600	1204800	3529100	2205300	2208800	2560400	0	2352300	3151400	0	2525000	2956600	3413600	2182400	2515200	0	946450	2130100	642890	1790200
AT1G61590.1	AT1G61590.1	Protein kinase superfamily protein	1	S	55	40.5891	0.01337	42.001	32.787	40.589	0	1705600	1653000	0	0	2140200	0	1095700	0	0	1377500	0	0	2197100	0	2476100	0	2625500	0	2053200
AT1G61690.1	AT1G61690.1	phosphoinositide binding	1	S	251	51.013	0.00467673	51.013	31.881	51.013	3360200	0	2768000	3528600	0	0	0	1873300	2693300	0	0	4468100	0	3267500	0	3661300	577850	0	688330	2740300
AT1G61730.1	AT1G61730.1	DNA-binding storekeeper protein-related transcriptional regulator	0.975926	S	49	16.1885	1.17352e-10	131.69	107.4	89.484	9600100	8084400	6682200	8250600	4752800	9743800	12384000	3890800	6815800	5518200	6705100	6014700	8506800	6874300	5539400	11960000	3958200	12516000	10590000	11637000
AT1G61890.1	AT1G61890.1	MATE efflux family protein	0.996081	S	5	24.07	2.28484e-05	92.95	79.893	92.95	9220400	4266200	12199000	25110000	16264000	19754000	0	8750000	11942000	0	5652600	13442000	0	17812000	7049200	0	3685600	21819000	0	9101100
AT1G61890.1	AT1G61890.1	MATE efflux family protein	0.622539	S	16	0	0.00513884	40.88	30.191	40.88	3725100	1622800	3251400	7980700	6939900	0	4715200	4424700	5102800	2697800	3124400	7901600	0	6646600	5243600	4225100	0	0	0	2620200
AT1G61890.1	AT1G61890.1	MATE efflux family protein	0.622539	S	17	0	0.000118491	73.405	68.788	40.88	6918200	1622800	3251400	13073000	6939900	5722600	8187000	6852100	8406900	2697800	5887300	12746000	4279700	6646600	8444100	4225100	1400900	0	0	5869400
AT1G61890.1	AT1G61890.1	MATE efflux family protein	0.741447	S	19	1.7095	0.00513884	40.88	30.191	40.88	3725100	1622800	3251400	7980700	6939900	0	4715200	4424700	5102800	2697800	3124400	7901600	0	6646600	5243600	4225100	0	0	0	2620200
AT1G61930.1	AT1G61930.1	Protein of unknown function, DUF584	0.879464	S	115	8.63842	0.00394341	53.754	23.773	53.754	0	0	0	2518500	0	0	0	1060300	0	1075500	0	2735300	0	1444200	1681100	0	417240	2108100	536460	0
AT1G62300.1	AT1G62300.1	WRKY family transcription factor	0.999984	S	268	48.209	7.43981e-06	102.58	82.21	102.58	48982000	51862000	57349000	73526000	49690000	49689000	57995000	31650000	44071000	37987000	37602000	58920000	52977000	49706000	44669000	47621000	16826000	43849000	30743000	51496000
AT1G62330.1	AT1G62330.1	O-fucosyltransferase family protein	1	S	30	85.5964	3.62271e-37	188.96	163.25	161	37838000	24743000	31417000	66703000	35252000	44860000	30618000	19985000	31012000	26999000	21200000	30510000	37121000	33493000	29655000	28251000	8635200	30315000	7653800	26160000
AT1G62330.1	AT1G62330.1	O-fucosyltransferase family protein	0.997204	S	34	25.5225	3.62271e-37	188.96	163.25	187.04	30670000	20964000	26881000	55309000	28450000	37694000	24765000	16625000	24625000	21048000	18086000	24692000	28420000	26983000	24877000	23064000	6826300	30315000	5986800	22311000
AT1G62390.1	AT1G62390.1	Octicosapeptide/Phox/Bem1p (PB1) domain-containing protein / tetratricopeptide repeat (TPR)-containing protein	0.831614	S	216	6.95715	7.33884e-05	91.914	74.05	57.52	0	1481900	0	0	0	2243400	0	0	0	0	0	0	0	0	0	0	0	0	0	0
AT1G62390.1	AT1G62390.1	Octicosapeptide/Phox/Bem1p (PB1) domain-containing protein / tetratricopeptide repeat (TPR)-containing protein	0.661938	S	261	2.91822	0.00355095	59.35	44.089	59.35	0	6691600	0	13457000	0	0	0	0	0	0	0	0	0	0	0	0	0	0	0	0
AT1G62390.1	AT1G62390.1	Octicosapeptide/Phox/Bem1p (PB1) domain-containing protein / tetratricopeptide repeat (TPR)-containing protein	0.917383	S	263	10.4548	0.00026954	80.318	71.786	80.318	0	6691600	0	0	8716400	0	14021000	0	0	0	0	4259700	0	3616100	6030600	0	2892100	0	7165400	8132000
AT1G62390.1	AT1G62390.1	Octicosapeptide/Phox/Bem1p (PB1) domain-containing protein / tetratricopeptide repeat (TPR)-containing protein	0.499615	T	215	0	7.33884e-05	91.914	74.05	91.914	0	0	0	0	0	0	0	0	0	0	0	0	0	0	0	0	0	0	0	0
AT1G62430.1	AT1G62430.1	CDP-diacylglycerol synthase 1	0.764154	S	8	6.97286	0.000104706	82.349	67.147	82.349	8400600	6383100	0	8511200	13487000	10497000	9866600	0	6866400	6953900	0	0	0	0	0	9888300	2933700	9883200	2394400	6048100
AT1G62430.1	AT1G62430.1	CDP-diacylglycerol synthase 1	0.480801	S	9	0.759103	0.000125814	79.022	43.363	56.514	0	0	0	0	0	0	0	0	0	0	0	0	0	0	0	0	0	0	0	0
AT1G62430.1	AT1G62430.1	CDP-diacylglycerol synthase 1	0.619948	S	11	2.44213	1.68776e-13	146.78	128.03	146.78	0	0	18472000	0	0	0	0	0	0	0	0	23302000	10646000	27185000	0	0	0	23898000	7471400	0
AT1G62430.1	AT1G62430.1	CDP-diacylglycerol synthase 1	0.999709	S	23	35.3652	0.0025804	57.802	13.81	57.52	4217100	3770400	4489400	5172200	2216700	4524700	3838700	3404000	3614300	3072900	2936500	3034900	4295600	6166200	3988600	3913700	1139200	2456300	2223000	3954600
AT1G62430.1	AT1G62430.1	CDP-diacylglycerol synthase 1	0.500754	T	7	1.01203	0.000125814	79.022	43.363	78.234	0	0	0	0	0	0	0	0	0	0	0	0	10646000	0	0	0	0	0	0	0
AT1G62430.1	AT1G62430.1	CDP-diacylglycerol synthase 1	0.855909	T	12	8.12271	2.50125e-19	156.49	143.51	125.52	28093000	24928000	0	8511200	34606000	31778000	30683000	0	28405000	22082000	10535000	0	0	0	0	34103000	10977000	9883200	2394400	23958000
AT1G62480.1	AT1G62480.1	Vacuolar calcium-binding protein-related	1	T	74	87.8339	3.68194e-36	157.68	130.59	157.68	4858000	0	3092300	15403000	8474900	3939800	1000600	1103700	3227300	2263800	8451600	9106400	13124000	8265500	0	14599000	0	9777500	466650	0
AT1G62490.1	AT1G62490.1	Mitochondrial transcription termination factor family protein	0.563248	S	290	1.13491	0.0147126	49.418	21.405	49.418	7219800	4739400	0	0	13185000	0	21616000	7380500	0	0	10247000	21974000	2676900	17442000	12727000	19546000	0	0	8476900	12019000
AT1G62490.1	AT1G62490.1	Mitochondrial transcription termination factor family protein	0.563248	S	294	1.13491	0.0147126	49.418	21.405	49.418	7219800	4739400	0	0	13185000	0	21616000	7380500	0	0	10247000	21974000	2676900	17442000	12727000	19546000	0	0	8476900	12019000
AT1G62740.1	AT1G62740.1	stress-inducible protein, putative	0.99994	S	168	42.1833	5.06003e-05	74.789	58.536	74.789	2740600	3268600	2177200	4265800	0	0	4953800	2213500	0	0	3582700	0	0	0	1908400	3477000	0	0	1302400	0
AT1G62930.1	AT1G62930.1	Tetratricopeptide repeat (TPR)-like superfamily protein	0.960431	S	154	16.5331	0.00899139	41.092	17.611	41.092	42416000	28758000	0	41626000	0	0	0	0	49681000	15089000	0	0	0	0	0	60209000	0	0	0	0
AT1G62930.1	AT1G62930.1	Tetratricopeptide repeat (TPR)-like superfamily protein	0.960632	S	155	16.5331	0.00899139	41.092	17.611	41.092	42416000	28758000	0	41626000	0	0	0	0	49681000	15089000	0	0	0	0	0	60209000	0	0	0	0
AT1G62930.1	AT1G62930.1	Tetratricopeptide repeat (TPR)-like superfamily protein	0.960431	T	152	16.5331	0.00899139	41.092	17.611	41.092	42416000	28758000	0	41626000	0	0	0	0	49681000	15089000	0	0	0	0	0	60209000	0	0	0	0
AT1G63000.1	AT1G63000.1	nucleotide-rhamnose synthase/epimerase-reductase ; rhamnose biosynthesis 1	0.78046	S	142	6.41978	1.29122e-05	89.507	65.675	89.507	5264600	1662000	2003700	1653800	1166000	0	0	0	0	0	0	0	3642500	1464700	1196500	4407500	608060	2800500	792930	1520200
AT1G63000.1	AT1G63000.1	nucleotide-rhamnose synthase/epimerase-reductase ; rhamnose biosynthesis 1	0.590391	S	145	2.48996	0.0109493	45.115	29.486	44.457	0	0	0	0	0	2813300	0	0	0	0	0	0	0	0	0	0	0	0	0	0
AT1G63010.2	AT1G63010.2	Major Facilitator Superfamily with SPX (SYG1/Pho81/XPR1) domain-containing protein ; Major Facilitator Superfamily with SPX (SYG1/Pho81/XPR1) domain-containing protein ; Major Facilitator Superfamily with SPX (SYG1/Pho81/XPR1) domain-containing protein ;	0.990059	S	484	20.194	1.07376e-20	129.9	119.75	129.9	3844800	2275500	4890900	0	0	0	0	0	0	0	0	0	16926000	4144400	0	6210700	0	4643100	0	884450
AT1G63010.2	AT1G63010.2	Major Facilitator Superfamily with SPX (SYG1/Pho81/XPR1) domain-containing protein ; Major Facilitator Superfamily with SPX (SYG1/Pho81/XPR1) domain-containing protein ; Major Facilitator Superfamily with SPX (SYG1/Pho81/XPR1) domain-containing protein ;	0.258084	S	184	0	6.6028e-05	45.751	40.997	45.751	0	0	0	0	0	0	0	0	0	0	0	0	0	0	0	0	0	0	0	0
AT1G63010.2	AT1G63010.2	Major Facilitator Superfamily with SPX (SYG1/Pho81/XPR1) domain-containing protein ; Major Facilitator Superfamily with SPX (SYG1/Pho81/XPR1) domain-containing protein ; Major Facilitator Superfamily with SPX (SYG1/Pho81/XPR1) domain-containing protein ;	0.258084	S	187	0	6.6028e-05	45.751	40.997	45.751	0	0	0	0	0	0	0	0	0	0	0	0	0	0	0	0	0	0	0	0
AT1G63640.2	AT1G63640.2	P-loop nucleoside triphosphate hydrolases superfamily protein with CH (Calponin Homology) domain ; P-loop nucleoside triphosphate hydrolases superfamily protein with CH (Calponin Homology) domain	0.999877	S	865	39.1168	6.16616e-05	80.979	37.697	63.408	2701400	0	4743800	0	2642000	3027800	0	2803800	2317400	0	2015100	2916000	0	4730500	2053100	3570700	0	2901700	2100600	0
AT1G63640.2	AT1G63640.2	P-loop nucleoside triphosphate hydrolases superfamily protein with CH (Calponin Homology) domain ; P-loop nucleoside triphosphate hydrolases superfamily protein with CH (Calponin Homology) domain	0.5	S	856	0	0.00563376	58.889	31.365	44.425	13919000	0	0	20892000	20402000	14871000	0	0	24359000	0	0	13821000	16246000	16917000	0	11395000	7443200	0	10917000	0
AT1G63640.2	AT1G63640.2	P-loop nucleoside triphosphate hydrolases superfamily protein with CH (Calponin Homology) domain ; P-loop nucleoside triphosphate hydrolases superfamily protein with CH (Calponin Homology) domain	0.616923	T	855	2.06946	0.00563376	58.889	31.365	50.353	13919000	0	0	20892000	20402000	14871000	0	0	24359000	0	0	13821000	16246000	16917000	0	11395000	7443200	19628000	10917000	20974000
AT1G63680.1	AT1G63680.1	acid-amino acid ligases;ligases;ATP binding;ATP binding;ligases	0.999807	S	194	38.0345	3.67306e-11	117.55	104.92	117.55	2669900	1831800	1543800	1985300	0	0	0	0	1562800	0	988550	2546100	0	0	1001100	7122800	0	2058700	0	1032300
AT1G63680.1	AT1G63680.1	acid-amino acid ligases;ligases;ATP binding;ATP binding;ligases	1	T	167	84.9623	6.6655e-10	84.962	79.532	84.962	0	0	0	3893200	3649100	0	0	1367300	0	0	1091700	0	3615900	0	0	8641000	0	6161700	337210	0
AT1G63680.1	AT1G63680.1	acid-amino acid ligases;ligases;ATP binding;ATP binding;ligases	0.720345	T	188	6.64986	0.000586103	70.335	52.535	46.159	0	0	0	0	2546400	0	0	0	0	0	0	0	2333200	0	0	0	0	0	0	0
AT1G63700.1	AT1G63700.1	Protein kinase superfamily protein	0.432635	S	716	1.86233	0.00241487	56.951	39.926	56.205	0	0	0	0	0	0	0	0	0	0	0	0	0	0	0	0	0	0	0	0
AT1G63700.1	AT1G63700.1	Protein kinase superfamily protein	0.332531	S	718	0	0.00241487	56.951	39.926	50.207	0	0	0	0	0	0	0	0	0	0	0	0	0	0	0	0	0	0	0	0
AT1G63700.1	AT1G63700.1	Protein kinase superfamily protein	0.770377	S	720	6.44603	0.00241487	56.951	39.926	51.726	0	0	0	5293100	0	0	0	0	0	0	0	0	0	0	2227000	0	0	0	0	0
AT1G63850.1	AT1G63850.1	BTB/POZ domain-containing protein	1	S	130	123.591	1.0819e-42	185.18	161.88	134.14	7313400	6774700	8262900	23326000	20931000	19300000	15196000	7466200	13730000	14056000	8913700	20967000	16746000	15872000	9368700	12042000	3766900	16168000	0	8781300
AT1G64090.1	AT1G64090.1	Reticulan like protein B3 ; Reticulan like protein B3	0.600194	S	32	5.9056	0.000456674	54.167	44.604	54.15	0	0	0	23211000	0	0	0	0	0	0	0	0	0	0	0	0	0	0	0	0
AT1G64190.1	AT1G64190.1	6-phosphogluconate dehydrogenase family protein	0.646865	S	58	2.66045	3.29522e-12	130.27	117.31	130.27	0	0	12822000	0	0	0	0	0	0	0	0	0	0	0	0	0	0	0	0	0
AT1G64190.1	AT1G64190.1	6-phosphogluconate dehydrogenase family protein	0.998171	S	62	27.4067	3.45694e-27	171.56	148.24	156.11	17506000	16206000	0	18828000	15379000	0	17313000	12679000	15123000	10498000	12881000	20040000	0	12818000	11805000	16520000	0	18671000	5219600	0
AT1G64440.1	AT1G64440.1	NAD(P)-binding Rossmann-fold superfamily protein	0.407429	S	343	0	0.0060346	48.112	42.173	48.112	0	0	0	0	0	0	0	0	0	0	0	0	0	0	0	0	0	0	0	0
AT1G64440.1	AT1G64440.1	NAD(P)-binding Rossmann-fold superfamily protein	0.407429	S	344	0	0.0060346	48.112	42.173	48.112	0	0	0	0	0	0	0	0	0	0	0	0	0	0	0	0	0	0	0	0
AT1G64500.1	AT1G64500.1	Glutaredoxin family protein	0.499364	S	113	0	0.00685067	50.284	31.972	50.284	0	0	0	0	0	0	0	0	0	0	0	0	0	0	0	0	0	0	0	0
AT1G64500.1	AT1G64500.1	Glutaredoxin family protein	0.973773	S	115	16.8678	0.000211845	70.622	55.59	70.622	1621900	1555700	0	5497200	2733100	0	4186900	1594300	0	2717300	0	3072500	1848100	1413300	0	0	0	0	0	0
AT1G64650.2	AT1G64650.2	Major facilitator superfamily protein ; Major facilitator superfamily protein	0.647619	S	401	2.64314	3.39707e-07	109.22	49.679	109.22	0	0	0	0	0	0	0	0	0	0	0	0	0	0	0	0	0	0	0	30151000
AT1G64650.2	AT1G64650.2	Major facilitator superfamily protein ; Major facilitator superfamily protein	0.997213	S	403	25.5381	3.06506e-31	164.92	99.419	139.3	27291000	27095000	9639300	19019000	16954000	18907000	30590000	12163000	19778000	22381000	10305000	33439000	30378000	14239000	12948000	22788000	7360100	26359000	16854000	0
AT1G64780.1	AT1G64780.1	ammonium transporter 1;2	1	T	472	79.1531	7.63445e-06	90.05	56.175	89.506	0	9033700	0	0	1708500	0	8459800	3588400	0	4734100	0	8292700	6124700	2299300	0	7909200	1139300	4319500	0	3186000
AT1G64790.1	AT1G64790.1	ILITYHIA ; ILITYHIA	1	S	1801	135.757	0	369.88	347.53	369.88	465670000	358520000	418150000	641310000	475840000	568460000	460880000	277980000	395360000	356830000	311420000	416320000	450650000	436190000	397650000	420990000	156830000	516870000	150290000	358790000
AT1G65010.1	AT1G65010.1	Plant protein of unknown function (DUF827)	0.524913	S	46	0.625846	0.000235279	72.771	40.971	72.771	0	0	0	0	0	0	0	0	0	10142000	0	11537000	0	0	0	0	0	0	0	0
AT1G65010.1	AT1G65010.1	Plant protein of unknown function (DUF827)	0.964439	S	50	14.8873	1.51811e-05	106.93	91.675	86.488	7224100	10889000	7827300	13655000	0	0	11231000	0	0	0	1197700	0	0	0	12372000	0	4036300	9373300	5418700	10090000
AT1G65010.1	AT1G65010.1	Plant protein of unknown function (DUF827)	0.499602	S	1267	0	1.15062e-29	173.59	145.12	173.59	0	0	0	0	0	0	0	0	0	0	0	0	0	0	0	0	0	0	0	0
AT1G65010.1	AT1G65010.1	Plant protein of unknown function (DUF827)	0.999966	S	1270	45.1549	4.84467e-95	242.94	228.29	233.54	67341000	57443000	17910000	115620000	71398000	89196000	68697000	31622000	45183000	39792000	31572000	53966000	62374000	57201000	45308000	92804000	22481000	88684000	14070000	62580000
AT1G65010.1	AT1G65010.1	Plant protein of unknown function (DUF827)	1	S	1279	79.2686	1.55982e-78	233.19	203.92	184.97	20810000	19068000	18328000	37800000	25454000	34747000	23760000	11377000	15980000	15105000	14455000	21577000	29034000	22794000	14186000	24324000	6718200	30865000	2385900	18859000
AT1G65010.1	AT1G65010.1	Plant protein of unknown function (DUF827)	0.550109	T	1275	0.963868	0.00141515	61.703	44.773	57.432	0	0	0	0	0	0	0	0	0	0	9689800	0	0	0	0	0	3307900	0	2732500	0
AT1G65030.1	AT1G65030.1	Transducin/WD40 repeat-like superfamily protein	1	S	344	42.3169	5.25794e-10	138.97	123.4	42.317	14010000	8335000	12235000	19229000	13210000	8145800	8172700	8148700	13912000	9936700	7711800	13898000	0	9679400	13368000	6270100	3988100	7663800	4616600	11050000
AT1G65280.1	AT1G65280.1	DNAJ heat shock N-terminal domain-containing protein	0.65687	S	222	3.44045	0.0123086	42.716	17.28	42.716	0	0	0	0	6719500	0	0	0	0	0	0	0	0	0	0	0	0	0	0	0
AT1G65280.1	AT1G65280.1	DNAJ heat shock N-terminal domain-containing protein	0.995795	S	224	24.4996	7.13863e-16	150.23	128.41	150.23	8111200	0	0	0	0	0	0	0	6934000	0	0	0	0	0	0	0	0	0	0	0
AT1G65320.1	AT1G65320.1	Cystathionine beta-synthase (CBS) family protein	0.824517	S	337	9.72993	4.10471e-06	98.407	98.407	95.018	0	33387000	0	52614000	0	0	33929000	0	0	0	0	0	0	29320000	30994000	0	16562000	42029000	16743000	0
AT1G65320.1	AT1G65320.1	Cystathionine beta-synthase (CBS) family protein	0.621329	T	336	2.59298	4.45684e-05	90.614	64.496	90.614	43055000	0	0	0	0	0	0	0	0	27874000	0	0	0	0	0	0	0	0	0	0
AT1G65440.3	AT1G65440.3	global transcription factor group B1 ; global transcription factor group B1 ; global transcription factor group B1	0.999998	S	991	56.6548	8.34154e-25	149.49	139.89	149.49	0	357410	0	0	1343500	1569300	1592900	671500	1194500	900780	976620	0	1500300	1123000	1215200	8459600	403880	2816100	218880	1523100
AT1G65660.1	AT1G65660.1	Pre-mRNA splicing Prp18-interacting factor	1	S	193	186.628	7.67248e-39	186.63	154.27	186.63	0	0	0	0	0	0	0	0	0	0	0	0	0	0	0	15102000	7055600	0	0	0
AT1G66260.2	AT1G66260.2	RNA-binding (RRM/RBD/RNP motifs) family protein ; RNA-binding (RRM/RBD/RNP motifs) family protein	0.999763	S	2	36.2542	0.010054	43.382	35.737	43.382	0	299700	343120	0	755580	0	444300	0	454750	420690	430550	0	0	0	0	709010	83000	0	0	0
AT1G66680.1	AT1G66680.1	S-adenosyl-L-methionine-dependent methyltransferases superfamily protein	0.237874	S	32	0	0.000644557	49.001	35.8	49.001	0	0	0	0	0	0	0	0	0	0	0	0	0	0	0	0	0	0	0	0
AT1G66680.1	AT1G66680.1	S-adenosyl-L-methionine-dependent methyltransferases superfamily protein	0.999932	S	35	41.7276	3.70023e-132	275.69	256.56	245.78	24628000	23079000	19007000	13160000	13636000	33520000	19842000	13760000	25949000	15199000	10719000	21059000	26412000	17182000	10407000	25503000	5554800	14542000	7347300	15215000
AT1G66680.1	AT1G66680.1	S-adenosyl-L-methionine-dependent methyltransferases superfamily protein	0.237874	S	40	0	0.000644557	49.001	35.8	49.001	0	0	0	0	0	0	0	0	0	0	0	0	0	0	0	0	0	0	0	0
AT1G66750.1	AT1G66750.1	CDK-activating kinase 4	0.999938	S	328	42.0722	2.83699e-15	154.65	129.6	154.65	12527000	8292300	6065000	12720000	7787900	12141000	8987400	4190200	5742400	4402800	3908100	9268000	10291000	8352700	8626300	7877800	2467100	9651800	0	6568000
AT1G66750.1	AT1G66750.1	CDK-activating kinase 4	1	S	333	87.9069	2.83699e-15	154.65	129.6	104.84	12527000	8292300	6065000	12720000	7787900	12141000	8987400	4190200	5742400	4402800	3908100	9268000	10291000	8352700	8626300	7877800	2467100	9651800	0	6568000
AT1G67120.1	AT1G67120.1	ATPases;nucleotide binding;ATP binding;nucleoside-triphosphatases;transcription factor binding	1	S	5048	76.2924	3.22399e-38	148.82	130.9	121.25	22306000	16056000	17136000	20287000	15674000	35685000	8361000	9281800	22389000	9970500	5727400	23358000	21048000	13492000	10407000	24820000	6444300	14524000	7811800	16164000
AT1G67120.1	AT1G67120.1	ATPases;nucleotide binding;ATP binding;nucleoside-triphosphatases;transcription factor binding	0.354372	T	5040	0.632395	3.22399e-38	148.82	130.9	41.27	0	0	0	0	0	0	0	0	0	0	0	0	0	0	0	0	0	0	0	0
AT1G67120.1	AT1G67120.1	ATPases;nucleotide binding;ATP binding;nucleoside-triphosphatases;transcription factor binding	0.50383	T	5043	1.17789	3.22399e-38	148.82	130.9	140.38	0	23015000	0	0	0	0	0	0	0	0	0	0	0	0	0	0	0	0	0	0
AT1G67140.1	AT1G67140.1	HEAT repeat-containing protein ; HEAT repeat-containing protein ; HEAT repeat-containing protein	0.999963	S	2065	44.3402	1.89697e-36	162.19	148.03	148.12	18546000	16396000	11790000	16797000	12639000	24005000	13197000	8734300	12991000	15757000	6307100	13209000	3608000	13838000	9264500	15708000	0	9364800	4600300	10255000
AT1G67140.1	AT1G67140.1	HEAT repeat-containing protein ; HEAT repeat-containing protein ; HEAT repeat-containing protein	0.999754	S	2046	36.0966	2.58093e-20	156.24	135.82	148.52	0	4653600	4183500	0	5043500	7619400	4042100	3213200	4768300	0	0	0	9620200	0	0	8368500	1585000	6816800	1715800	3072300
AT1G67230.1	AT1G67230.1	little nuclei1	0.828281	S	932	7.04012	4.07222e-35	180.86	158.81	60.209	11071000	0	0	11064000	0	0	0	0	0	5176000	0	0	0	0	0	0	0	0	0	0
AT1G67230.1	AT1G67230.1	little nuclei1	1	S	883	64.2154	1.4116e-37	183.45	159.04	128.98	27629000	32320000	21309000	31876000	34150000	37110000	25352000	15444000	23051000	23687000	18914000	34126000	31305000	28781000	29063000	23807000	8632600	24677000	8688200	19831000
AT1G67230.1	AT1G67230.1	little nuclei1	0.999984	S	885	47.8328	4.80202e-79	237.14	219.27	128.98	18621000	16692000	15226000	26341000	22781000	30562000	17752000	12327000	16576000	16210000	13564000	28766000	20108000	14987000	22625000	15224000	5037700	20262000	6715700	17133000
AT1G67230.1	AT1G67230.1	little nuclei1	0.999936	S	774	41.9359	6.07248e-37	186.96	166.23	182.15	16547000	13605000	12434000	18697000	20949000	24252000	12972000	9532100	14229000	10702000	11502000	13411000	16526000	14484000	13149000	16935000	4080000	22905000	3568300	9861200
AT1G67230.1	AT1G67230.1	little nuclei1	0.999959	S	865	43.9243	1.25e-111	254.58	221.58	210.98	11683000	10447000	9085200	12226000	10844000	13336000	15192000	6971200	7970800	8080000	7425000	10814000	16686000	11512000	8145500	11027000	3926900	13574000	3535600	9266500
AT1G67230.1	AT1G67230.1	little nuclei1	0.9973	S	1089	25.6739	0.00188239	57.288	44.449	57.288	0	0	1046000	2567600	0	0	0	1229900	0	0	0	3979200	5261600	2792700	831670	2617300	0	4381700	0	1272300
AT1G67230.1	AT1G67230.1	little nuclei1	0.999971	S	1093	45.5024	2.95807e-10	137.19	85.645	124.43	28708000	15239000	26570000	25525000	16088000	40992000	14643000	15568000	24700000	9950000	8002700	33372000	56132000	31515000	9919200	29625000	6298900	37156000	5068600	15517000
AT1G67230.1	AT1G67230.1	little nuclei1	0.999965	S	1027	44.5718	0.00488408	51.013	22.055	51.013	19591000	12737000	13222000	24507000	18683000	20031000	14410000	8185300	0	10267000	8596100	20286000	20465000	0	8960400	16676000	5861500	20194000	6366000	18612000
AT1G67230.1	AT1G67230.1	little nuclei1	0.999986	S	1105	48.4507	4.94139e-64	218.98	206.04	218.98	20598000	16067000	15984000	0	18278000	26346000	16737000	11076000	13517000	11451000	9893300	26059000	25809000	19875000	10413000	23223000	6723600	29731000	5544400	17138000
AT1G67230.1	AT1G67230.1	little nuclei1	0.999829	S	1112	37.3564	0.00437661	58.92	45.088	58.92	0	0	0	0	0	0	0	0	0	0	0	0	0	0	0	0	0	0	0	0
AT1G67230.1	AT1G67230.1	little nuclei1	1	S	1001	152.992	2.99636e-58	181.76	158.01	152.99	18979000	0	0	0	0	0	0	0	15194000	10945000	9697100	22485000	20565000	16918000	0	0	0	0	0	0
AT1G67230.1	AT1G67230.1	little nuclei1	0.533777	T	933	0.65245	4.07222e-35	180.86	158.81	47.757	0	0	0	0	0	15930000	0	0	0	0	0	0	0	0	0	0	0	0	0	0
AT1G67230.1	AT1G67230.1	little nuclei1	0.698593	T	1099	3.65071	2.1395e-07	104.6	78.773	104.6	0	0	0	22446000	0	0	0	0	0	0	0	0	0	0	0	0	0	0	0	0
AT1G67310.1	AT1G67310.1	Calmodulin-binding transcription activator protein with CG-1 and Ankyrin domains	0.998068	S	935	28.5591	2.67307e-09	137.61	114.38	118.47	5446100	5353600	0	2047400	3176000	0	0	0	4191200	3341900	0	0	0	0	0	0	0	0	0	0
AT1G67325.1	AT1G67325.1	Ran BP2/NZF zinc finger-like superfamily protein ; Ran BP2/NZF zinc finger-like superfamily protein	0.857359	S	277	7.80136	4.48766e-05	88.507	53.753	88.507	0	0	0	0	3389400	0	3292100	3972400	4995300	0	0	7788200	0	0	0	10891000	3159200	2038900	2579300	5649100
AT1G67580.2	AT1G67580.2	Protein kinase superfamily protein ; Protein kinase superfamily protein	1	S	728	47.9714	8.53202e-08	111.39	79.957	47.971	16117000	11553000	14307000	16489000	12746000	20228000	0	10040000	0	9047500	8918600	20080000	0	15417000	11192000	17061000	5394000	22808000	5324200	14285000
AT1G67580.2	AT1G67580.2	Protein kinase superfamily protein ; Protein kinase superfamily protein	0.962236	S	309	14.0317	3.90538e-06	88.075	69.813	42.314	0	0	0	0	0	0	0	0	0	0	0	0	0	0	0	0	0	0	0	0
AT1G67580.2	AT1G67580.2	Protein kinase superfamily protein ; Protein kinase superfamily protein	0.463465	S	277	0	0.00321135	49.528	44.398	47.532	0	0	0	0	0	0	0	0	0	0	0	0	0	0	0	0	0	0	0	0
AT1G67580.2	AT1G67580.2	Protein kinase superfamily protein ; Protein kinase superfamily protein	0.463465	S	278	0	0.00321135	49.528	44.398	47.532	0	0	0	0	0	0	0	0	0	0	0	0	0	0	0	0	0	0	0	0
AT1G67580.2	AT1G67580.2	Protein kinase superfamily protein ; Protein kinase superfamily protein	0.999992	T	311	50.8495	1.23892e-10	136.14	106	136.14	11907000	8398900	10161000	20736000	11596000	19414000	12927000	8391800	9952300	7224800	0	14746000	16030000	9876100	11322000	14586000	4605900	15605000	3033300	12614000
AT1G67580.2	AT1G67580.2	Protein kinase superfamily protein ; Protein kinase superfamily protein	0.333333	T	280	0	0.00321135	49.528	44.398	40.381	0	0	0	0	0	0	0	0	0	0	0	0	0	0	0	0	0	0	0	0
AT1G67590.2	AT1G67590.2	Remorin family protein ; Remorin family protein	0.98974	S	180	21.485	5.07456e-05	106.6	85.644	73.783	37494000	6435100	26373000	58930000	15651000	52069000	9999300	14756000	27726000	3394100	10828000	50022000	42908000	24299000	31734000	35073000	10032000	0	6637100	30631000
AT1G67590.2	AT1G67590.2	Remorin family protein ; Remorin family protein	0.969085	S	184	14.8542	5.07456e-05	106.38	87.593	86.455	37494000	22521000	26373000	58930000	44458000	20650000	27918000	14756000	16518000	16892000	10828000	50022000	42908000	0	11033000	14366000	10032000	29580000	6637100	30631000
AT1G67590.2	AT1G67590.2	Remorin family protein ; Remorin family protein	0.988629	S	95	19.3922	1.05925e-05	97.734	39.364	97.734	33108000	9187900	20886000	35765000	21217000	34547000	17787000	11096000	26566000	13440000	13224000	24815000	24472000	18897000	15283000	13169000	8490500	35718000	6677400	31679000
AT1G67590.2	AT1G67590.2	Remorin family protein ; Remorin family protein	0.680624	T	174	1.04324	0.0102549	54.974	27.564	43.084	0	0	0	0	0	0	0	0	0	0	0	19099000	0	0	11033000	14366000	0	0	0	0
AT1G67590.2	AT1G67590.2	Remorin family protein ; Remorin family protein	0.941694	T	175	12.6025	0.000282389	73.783	50.547	53.565	11342000	6435100	6907600	19392000	44458000	20650000	9999300	4711100	11208000	3394100	0	19099000	16622000	0	0	14366000	2523300	0	1761700	8668000
AT1G67590.2	AT1G67590.2	Remorin family protein ; Remorin family protein	0.844734	T	183	8.79612	8.33023e-05	106.6	85.644	98.281	0	0	0	0	0	31419000	0	0	11208000	0	0	0	0	24299000	20701000	20708000	0	0	0	0
AT1G67630.1	AT1G67630.1	DNA polymerase alpha 2	0.575595	T	112	1.67681	1.26155e-11	123.14	115.61	123.14	1986200	1531700	1791500	0	0	5975300	3261500	1113700	1688100	1946000	1687200	3468400	0	0	1718900	7804800	0	0	316760	1885100
AT1G67630.1	AT1G67630.1	DNA polymerase alpha 2	0.69406	T	113	6.5757	4.21821e-11	116.39	91.454	66.045	0	1681900	2005100	0	0	0	0	1069100	2985100	1904300	2691900	0	0	0	0	5940100	0	0	131930	0
AT1G67910.2	AT1G67910.2	unknown protein; FUNCTIONS IN: molecular_function unknown; INVOLVED IN: biological_process unknown; LOCATED IN: chloroplast; EXPRESSED IN: 21 plant structures; EXPRESSED DURING: 12 growth stages; BEST Arabidopsis thaliana protein match is: unknown protein	1	S	70	73.9788	7.88406e-08	116.19	98.052	116.19	2667500	1859800	1719500	2723500	2284300	3243700	1945100	1244500	1901500	1879600	1122800	2704800	5648300	2833700	970300	3347700	813480	3983300	579910	1118600
AT1G67930.1	AT1G67930.1	Golgi transport complex protein-related	0.266602	S	6	0	0.000733873	66.533	30.248	66.533	0	0	0	0	0	0	0	0	0	0	0	0	0	0	0	0	0	0	0	0
AT1G67930.1	AT1G67930.1	Golgi transport complex protein-related	0.266602	S	7	0	0.000733873	66.533	30.248	66.533	0	0	0	0	0	0	0	0	0	0	0	0	0	0	0	0	0	0	0	0
AT1G67930.1	AT1G67930.1	Golgi transport complex protein-related	0.410747	S	11	0	0.00588596	51.771	26.322	48.823	0	0	0	0	0	0	0	0	0	0	0	0	0	0	0	0	0	0	0	0
AT1G67930.1	AT1G67930.1	Golgi transport complex protein-related	0.410747	S	12	0	0.00588596	51.771	26.322	48.823	0	0	0	0	0	0	0	0	0	0	0	0	0	0	0	0	0	0	0	0
AT1G67950.4	AT1G67950.4	RNA-binding (RRM/RBD/RNP motifs) family protein ; RNA-binding (RRM/RBD/RNP motifs) family protein ; RNA-binding (RRM/RBD/RNP motifs) family protein ; RNA-binding (RRM/RBD/RNP motifs) family protein	0.953025	S	207	13.0724	7.87123e-58	203.51	173.75	191.79	35547000	21507000	20898000	40072000	28166000	34796000	28816000	21239000	24276000	18236000	18076000	37034000	28335000	27697000	18816000	34083000	9838400	35673000	7520400	26183000
AT1G68020.1	AT1G68020.1	UDP-Glycosyltransferase / trehalose-phosphatase family protein ; UDP-Glycosyltransferase / trehalose-phosphatase family protein	0.89112	S	5	9.13017	1.24894e-19	157.11	139.2	136.35	0	0	0	0	3730400	0	0	0	0	0	0	3939600	3791300	2586300	0	6223700	380970	4108700	391690	0
AT1G68020.1	AT1G68020.1	UDP-Glycosyltransferase / trehalose-phosphatase family protein ; UDP-Glycosyltransferase / trehalose-phosphatase family protein	0.558668	S	7	1.02426	8.46735e-07	121.27	104.52	121.27	0	0	0	5068100	3730400	0	2634800	0	0	0	0	0	0	0	0	0	0	0	0	0
AT1G68070.1	AT1G68070.1	Zinc finger, C3HC4 type (RING finger) family protein	1	S	143	83.2854	1.25432e-55	206.94	194.46	162.52	8549000	4802600	6231400	7232700	5935000	9152500	5807900	3804400	6298800	4477000	3055400	8847600	9679400	5742000	5065200	8564100	1456500	5133300	1826500	4284900
AT1G68070.1	AT1G68070.1	Zinc finger, C3HC4 type (RING finger) family protein	0.517169	S	6	3.91029	0.00660998	44.998	30.567	44.998	0	0	6683800	0	0	0	0	0	0	0	0	0	0	0	0	0	0	0	0	0
AT1G68330.1	AT1G68330.1	unknown protein; BEST Arabidopsis thaliana protein match is: unknown protein (TAIR:AT1G48780.1); Has 155 Blast hits to 147 proteins in 23 species: Archae - 0; Bacteria - 0; Metazoa - 19; Fungi - 3; Plants - 126; Viruses - 0; Other Eukaryotes - 7 (source:	0.356387	S	202	0	0.000508379	65.043	44.739	65.043	0	0	0	0	0	0	0	0	0	0	0	0	0	0	0	0	0	0	0	0
AT1G68330.1	AT1G68330.1	unknown protein; BEST Arabidopsis thaliana protein match is: unknown protein (TAIR:AT1G48780.1); Has 155 Blast hits to 147 proteins in 23 species: Archae - 0; Bacteria - 0; Metazoa - 19; Fungi - 3; Plants - 126; Viruses - 0; Other Eukaryotes - 7 (source:	0.356387	S	203	0	0.000508379	65.043	44.739	65.043	0	0	0	0	0	0	0	0	0	0	0	0	0	0	0	0	0	0	0	0
AT1G68330.1	AT1G68330.1	unknown protein; BEST Arabidopsis thaliana protein match is: unknown protein (TAIR:AT1G48780.1); Has 155 Blast hits to 147 proteins in 23 species: Archae - 0; Bacteria - 0; Metazoa - 19; Fungi - 3; Plants - 126; Viruses - 0; Other Eukaryotes - 7 (source:	0.739486	S	204	7.88781	0.00810921	46.964	31.577	41.092	0	0	0	2754400	0	0	0	0	0	0	1673000	0	0	0	0	0	0	0	0	0
AT1G68370.1	AT1G68370.1	Chaperone DnaJ-domain superfamily protein	0.588482	S	374	1.56619	0.00157389	53.475	44.981	46.578	1184600	0	0	0	1736900	2020800	2236900	1335000	2449400	2471100	1271600	2421600	946930	1685600	2052100	2176900	1453200	641830	0	3528300
AT1G68370.1	AT1G68370.1	Chaperone DnaJ-domain superfamily protein	0.999999	S	380	60.7749	1.41833e-43	183.12	179.84	183.12	0	28545000	13896000	51753000	28265000	12551000	32925000	10824000	0	27590000	18433000	21949000	6137700	14687000	41135000	9228800	0	0	18720000	24938000
AT1G68720.1	AT1G68720.1	tRNA arginine adenosine deaminase	0.999998	S	418	58.596	9.46068e-05	94.487	75.244	94.487	5361600	2444100	5404000	4308800	3808500	6269700	0	3345200	6355900	2680200	2295600	5562500	7051600	4060600	5072000	6646100	0	3485900	1937100	3515500
AT1G68720.1	AT1G68720.1	tRNA arginine adenosine deaminase	0.816302	S	899	6.47746	3.03693e-11	129.27	106.62	129.27	16101000	13319000	0	34484000	23987000	26991000	0	0	0	10667000	0	0	12174000	20087000	0	18284000	0	20465000	0	0
AT1G68720.1	AT1G68720.1	tRNA arginine adenosine deaminase	0.624131	T	898	2.2211	1.52931e-05	86.211	63.511	71.656	0	0	0	0	23987000	0	16033000	0	15139000	10667000	0	18571000	12174000	0	11604000	0	0	0	0	0
AT1G68790.1	AT1G68790.1	little nuclei3	0.967139	S	764	14.6939	4.22487e-09	134.14	111.91	134.14	8031600	7272400	9912800	22293000	12515000	0	0	4329400	7893800	0	5001100	0	11311000	9274200	0	0	3712200	14314000	2337400	8897900
AT1G68790.1	AT1G68790.1	little nuclei3	1	S	54	68.1712	0.000433603	68.171	42.126	68.171	2215900	0	2442300	3430700	2801600	3749100	2443100	0	2771600	0	3661100	3694100	1664500	1866000	2245700	2753300	970340	3409900	0	2028700
AT1G68790.1	AT1G68790.1	little nuclei3	0.999436	S	843	32.4818	1.14662e-19	128.9	66.734	128.9	11909000	8435900	5852100	7531000	8361100	10678000	6057900	6328100	8254300	6389400	4568700	0	0	7105400	5926800	9380000	4883300	9367100	4386500	7288400
AT1G68790.1	AT1G68790.1	little nuclei3	0.999984	S	910	48.5316	5.18177e-54	202.62	188	189.09	18003000	12507000	12936000	16037000	15574000	22122000	12212000	7059100	14044000	9107200	7113500	11802000	13853000	12630000	12406000	9929900	3519400	11556000	4033100	8386600
AT1G69030.1	AT1G69030.1	BSD domain-containing protein	1	S	304	141.37	1.60017e-31	162.22	117.91	141.37	136100000	69220000	130090000	96710000	98871000	166550000	66259000	70381000	96257000	49874000	63226000	149590000	202790000	139500000	65087000	182610000	35534000	219550000	30072000	82981000
AT1G69030.1	AT1G69030.1	BSD domain-containing protein	0.89973	S	252	9.54193	0.0117455	55.196	32.618	53.136	2502600	5020600	3218800	11604000	5445100	2458800	6559300	0	0	3002200	6138000	3888100	2940000	5419300	7816700	0	1160200	6621000	1258400	3041900
AT1G69040.1	AT1G69040.1	ACT domain repeat 4 ; ACT domain repeat 4	1	S	440	70.5516	4.78408e-05	72.643	57.499	70.552	7857500	0	3674100	19231000	9866600	10841000	0	3125900	0	0	6511600	0	0	0	0	0	4124800	0	0	7396400
AT1G69070.1	AT1G69070.1	FUNCTIONS IN: molecular_function unknown; INVOLVED IN: biological_process unknown; LOCATED IN: cellular_component unknown; EXPRESSED IN: 23 plant structures; EXPRESSED DURING: 13 growth stages; CONTAINS InterPro DOMAIN/s: Nop14-like protein (InterPro:IPR0	0.531733	Y	124	1.32151	1.27982e-05	74.786	68.057	74.786	0	0	0	0	0	0	0	0	0	0	0	0	0	0	3721400	0	0	0	0	0
AT1G69070.1	AT1G69070.1	FUNCTIONS IN: molecular_function unknown; INVOLVED IN: biological_process unknown; LOCATED IN: cellular_component unknown; EXPRESSED IN: 23 plant structures; EXPRESSED DURING: 13 growth stages; CONTAINS InterPro DOMAIN/s: Nop14-like protein (InterPro:IPR0	1	S	154	112.655	1.99138e-293	356.69	318.84	298.72	11397000	6788100	11413000	13696000	17652000	19072000	4968800	5661100	11587000	2958200	5872300	15346000	18360000	13991000	5191100	29178000	4503700	22589000	1257700	8045200
AT1G69070.1	AT1G69070.1	FUNCTIONS IN: molecular_function unknown; INVOLVED IN: biological_process unknown; LOCATED IN: cellular_component unknown; EXPRESSED IN: 23 plant structures; EXPRESSED DURING: 13 growth stages; CONTAINS InterPro DOMAIN/s: Nop14-like protein (InterPro:IPR0	1	S	305	83.6798	6.84543e-95	243.23	216.82	183.09	15825000	21345000	27372000	34849000	24787000	39746000	12334000	8934100	16980000	13358000	12630000	24146000	26457000	26024000	12276000	13717000	2720300	23641000	2605800	14877000
AT1G69070.1	AT1G69070.1	FUNCTIONS IN: molecular_function unknown; INVOLVED IN: biological_process unknown; LOCATED IN: cellular_component unknown; EXPRESSED IN: 23 plant structures; EXPRESSED DURING: 13 growth stages; CONTAINS InterPro DOMAIN/s: Nop14-like protein (InterPro:IPR0	0.374256	S	122	0.941891	0.000717236	50.229	38.918	50.229	0	0	0	0	0	0	0	0	0	0	0	0	0	0	0	0	0	0	0	0
AT1G69070.1	AT1G69070.1	FUNCTIONS IN: molecular_function unknown; INVOLVED IN: biological_process unknown; LOCATED IN: cellular_component unknown; EXPRESSED IN: 23 plant structures; EXPRESSED DURING: 13 growth stages; CONTAINS InterPro DOMAIN/s: Nop14-like protein (InterPro:IPR0	1	S	127	77.8745	6.20855e-68	215.51	181.51	188.98	9975900	5551600	8857900	10023000	6120200	17012000	4155700	5563100	10492000	2743800	2926200	10516000	15716000	10710000	0	7638800	1306700	9396800	635400	4209700
AT1G69220.1	AT1G69220.1	Protein kinase superfamily protein	0.839358	S	235	8.41002	9.99227e-06	92.19	60.961	45.257	3755400	0	3097800	0	3413000	0	4310800	0	2712500	3122700	0	3673800	3784800	3870800	0	0	0	3087800	1807000	0
AT1G69220.1	AT1G69220.1	Protein kinase superfamily protein	0.588283	T	234	2.5032	0.000587715	71.176	42.014	53.967	0	0	0	6246100	0	0	0	0	0	0	0	0	0	0	0	0	0	0	0	0
AT1G69240.1	AT1G69240.1	methyl esterase 15	0.493868	S	104	0	0.00408498	49.31	41.585	49.31	0	0	0	0	0	0	0	0	0	0	0	0	0	0	0	0	0	0	0	0
AT1G69240.1	AT1G69240.1	methyl esterase 15	0.332719	S	119	0	3.13375e-07	76.956	70.004	76.956	0	0	0	0	0	0	0	0	0	0	0	0	0	0	0	0	0	0	0	0
AT1G69240.1	AT1G69240.1	methyl esterase 15	0.332719	S	121	0	3.13375e-07	76.956	70.004	76.956	0	0	0	0	0	0	0	0	0	0	0	0	0	0	0	0	0	0	0	0
AT1G69240.1	AT1G69240.1	methyl esterase 15	0.493868	T	106	0	0.00408498	49.31	41.585	49.31	0	0	0	0	0	0	0	0	0	0	0	0	0	0	0	0	0	0	0	0
AT1G69240.1	AT1G69240.1	methyl esterase 15	0.332719	T	120	0	3.13375e-07	76.956	70.004	76.956	0	0	0	0	0	0	0	0	0	0	0	0	0	0	0	0	0	0	0	0
AT1G69250.2	AT1G69250.2	Nuclear transport factor 2 (NTF2) family protein with RNA binding (RRM-RBD-RNP motifs) domain ; Nuclear transport factor 2 (NTF2) family protein with RNA binding (RRM-RBD-RNP motifs) domain	1	S	236	81.5653	0.00041974	81.565	70.306	81.565	0	1145600	0	7638900	3596300	0	0	0	0	2839700	0	0	0	0	3786600	0	0	0	959910	0
AT1G69340.1	AT1G69340.1	appr-1-p processing enzyme family protein	0.999989	S	318	49.722	1.88455e-08	126.68	106.81	126.68	0	0	4275400	4343500	4326500	2788700	5623900	0	0	4334600	7858200	8927300	0	0	4658500	28571000	0	5852100	0	102000
AT1G69340.1	AT1G69340.1	appr-1-p processing enzyme family protein	0.871011	T	16	8.4504	0.000110243	83.418	69.755	74.786	448070	2295700	307370	1425900	0	548290	0	596640	0	1375100	967260	1822100	2337400	702670	568260	3958200	363280	863180	532730	0
AT1G69340.1	AT1G69340.1	appr-1-p processing enzyme family protein	0.488242	T	18	0.593747	0.0124515	49.929	37.569	43.382	0	0	0	0	0	0	0	0	0	0	0	0	0	0	0	0	0	0	0	0
AT1G69410.1	AT1G69410.1	eukaryotic elongation factor 5A-3	1	S	2	87.4533	1.53666e-152	280.5	257.51	136.49	2714500000	1979400000	801420000	2197500000	1721400000	2122700000	1845300000	616900000	1328900000	1333500000	660660000	1816500000	2006200000	1179500000	1390100000	1288400000	310410000	1053900000	672630000	694220000
AT1G69510.3	AT1G69510.3	cAMP-regulated phosphoprotein 19-related protein ; cAMP-regulated phosphoprotein 19-related protein ; cAMP-regulated phosphoprotein 19-related protein	1	S	56	93.0108	5.24133e-24	155.86	128.71	93.011	1492500	3504400	0	0	6574500	5366600	7282200	952780	2230200	2007400	1754600	6472800	5063500	4466000	3277500	19138000	1213800	4757600	1224200	2345400
AT1G69570.1	AT1G69570.1	Dof-type zinc finger DNA-binding family protein	0.999739	Y	165	38.9918	0.01598	48.741	23.304	48.741	0	9270600	0	0	3079400	3033700	2822200	1057300	0	0	996840	0	0	0	1874200	1616600	0	0	0	0
AT1G69570.1	AT1G69570.1	Dof-type zinc finger DNA-binding family protein	0.998795	T	167	32.3419	0.01598	48.741	23.304	48.741	0	9270600	0	0	3079400	3033700	2822200	1057300	0	0	996840	0	0	0	1874200	1616600	0	0	0	0
AT1G70060.1	AT1G70060.1	SIN3-like 4	0.795759	S	905	6.68074	0.000166445	54.389	48.903	40.907	0	10840000	6444400	0	0	0	0	0	0	0	0	10606000	0	0	0	0	0	0	0	0
AT1G70060.1	AT1G70060.1	SIN3-like 4	0.54733	T	907	0.826827	2.72978e-08	72.707	58.654	72.707	7942800	0	0	0	0	0	9380300	5659400	6800900	8028400	0	0	8681500	7952500	8582300	6413400	2029600	9935800	1317900	5506900
AT1G70180.1	AT1G70180.1	Sterile alpha motif (SAM) domain-containing protein ; Sterile alpha motif (SAM) domain-containing protein	1	S	26	77.6997	8.15381e-08	115.8	99.231	105.03	4599900	3299200	3735900	7547900	5760000	6055000	4089700	2367200	4204300	3340500	3076300	4739900	5613300	3930800	4205600	5212300	1693300	4776600	1792100	2375400
AT1G70180.1	AT1G70180.1	Sterile alpha motif (SAM) domain-containing protein ; Sterile alpha motif (SAM) domain-containing protein	1	S	226	48.44	0.00259211	61.815	38.443	48.44	36946000	0	23878000	0	32768000	32886000	23894000	16543000	25522000	21500000	0	0	38702000	29306000	24241000	30444000	10746000	36490000	0	0
AT1G70180.1	AT1G70180.1	Sterile alpha motif (SAM) domain-containing protein ; Sterile alpha motif (SAM) domain-containing protein	1	S	242	46.5921	0.0111746	54.198	38.085	46.592	15002000	12812000	9735100	26991000	17950000	14662000	12871000	8449700	10358000	11284000	8169000	19082000	16246000	13954000	11849000	9071800	5803500	14690000	4585200	9940300
AT1G70180.1	AT1G70180.1	Sterile alpha motif (SAM) domain-containing protein ; Sterile alpha motif (SAM) domain-containing protein	1	S	274	57.1747	0.00368362	57.175	37.05	57.175	20208000	10444000	17860000	20047000	16446000	0	11848000	9807700	16874000	12695000	9974700	18375000	1018700	13207000	14446000	0	0	0	0	0
AT1G70180.1	AT1G70180.1	Sterile alpha motif (SAM) domain-containing protein ; Sterile alpha motif (SAM) domain-containing protein	0.999663	S	306	36.4697	1.16373e-05	112.3	100.01	88.992	3211500	4689200	4609900	4428700	1919800	5758200	2084100	0	4106900	0	0	5610800	6496600	2846600	1865700	4566300	1664800	4000600	1668000	4481200
AT1G70290.1	AT1G70290.1	trehalose-6-phosphatase synthase S8 ; trehalose-phosphatase/synthase 9	0.897338	S	568	9.42665	0.000437658	67.726	48.98	61.353	9981400	8240300	5861700	11246000	6918100	0	11955000	4964900	4962200	0	8093600	0	8790200	7136600	8538700	10560000	3170500	0	0	0
AT1G70320.1	AT1G70320.1	ubiquitin-protein ligase 2	0.977461	S	908	20.6357	8.92025e-55	187.76	161.55	150.31	36058000	52334000	26090000	46747000	30502000	59137000	36417000	15537000	30051000	22585000	24586000	39293000	35496000	36853000	0	28389000	0	26664000	5980600	17747000
AT1G70320.1	AT1G70320.1	ubiquitin-protein ligase 2	0.451058	S	2977	0	0.00206473	68.044	38.064	68.044	0	0	0	0	0	0	0	0	0	0	0	0	0	0	0	0	0	0	0	0
AT1G70320.1	AT1G70320.1	ubiquitin-protein ligase 2	0.578163	S	2978	3.83554	0.00206473	68.044	38.064	50.874	0	0	3761100	9449100	6137700	1980700	5519900	1838800	6229900	4931200	0	6951200	9357100	0	6115800	0	0	6721100	0	6341900
AT1G70320.1	AT1G70320.1	ubiquitin-protein ligase 2	1	S	2582	111.679	6.49353e-52	183.06	101.09	176.73	20178000	11619000	9615200	10260000	7134300	19235000	14597000	9974600	17011000	9978900	6357800	17415000	20423000	11266000	7250200	22980000	4331700	14887000	4842400	9860700
AT1G70770.2	AT1G70770.2	Protein of unknown function DUF2359, transmembrane ; Protein of unknown function DUF2359, transmembrane	1	S	87	79.8786	5.2032e-63	211.77	196.61	114.56	1690300000	1683100000	1329000000	2468300000	1664500000	2075600000	1667100000	946320000	1692900000	1267800000	993500000	2332500000	2364800000	1653600000	1842500000	1959200000	531540000	2261900000	625640000	1380600000
AT1G70770.2	AT1G70770.2	Protein of unknown function DUF2359, transmembrane ; Protein of unknown function DUF2359, transmembrane	0.999999	S	95	59.5538	0.00147777	61.87	45.377	61.87	4975800	8168600	5524700	10941000	6496400	10303000	8195000	1936400	4174600	0	2900800	10203000	8004500	4406800	10886000	0	0	0	0	0
AT1G70770.2	AT1G70770.2	Protein of unknown function DUF2359, transmembrane ; Protein of unknown function DUF2359, transmembrane	1	S	112	77.7019	0	511.18	511.18	331.01	159230000	136610000	143510000	101690000	125910000	174600000	127870000	93907000	128010000	117020000	64713000	164030000	163830000	121210000	57728000	162400000	45284000	122940000	33388000	158760000
AT1G70940.1	AT1G70940.1	Auxin efflux carrier family protein	0.235701	Y	234	0.912136	0.00127321	65.563	49.673	65.563	0	0	0	0	0	0	0	0	0	0	0	0	0	0	0	0	0	0	0	0
AT1G70940.1	AT1G70940.1	Auxin efflux carrier family protein	0.499989	S	293	0	0.00838441	50.354	32.653	49.423	0	0	0	0	7264800	0	0	3340800	0	0	0	0	0	0	0	0	0	0	0	0
AT1G70940.1	AT1G70940.1	Auxin efflux carrier family protein	0.96724	S	294	14.7019	1.91799e-77	236.75	219.13	151.04	10349000	6730200	8170500	6889400	7264800	8787300	7571500	3340800	4489300	3439500	1942300	9383800	15600000	5459500	1986500	7480800	0	3410100	3037100	0
AT1G70940.1	AT1G70940.1	Auxin efflux carrier family protein	0.247006	S	235	0	7.73345e-05	88.133	64.384	88.133	0	0	0	0	0	0	0	0	0	0	0	0	0	0	0	0	0	0	0	0
AT1G70940.1	AT1G70940.1	Auxin efflux carrier family protein	0.247006	S	237	0	7.73345e-05	88.133	64.384	88.133	0	0	0	0	0	0	0	0	0	0	0	0	0	0	0	0	0	0	0	0
AT1G70940.1	AT1G70940.1	Auxin efflux carrier family protein	0.247006	T	238	0	7.73345e-05	88.133	64.384	88.133	0	0	0	0	0	0	0	0	0	0	0	0	0	0	0	0	0	0	0	0
AT1G70940.1	AT1G70940.1	Auxin efflux carrier family protein	0.247006	T	239	0	7.73345e-05	88.133	64.384	88.133	0	0	0	0	0	0	0	0	0	0	0	0	0	0	0	0	0	0	0	0
AT1G71010.1	AT1G71010.1	FORMS APLOID AND BINUCLEATE CELLS 1C	0.995321	S	1184	23.2778	0.00336083	50.607	21.134	50.607	0	0	10462000	18853000	9961000	0	0	6860500	8578500	8513100	10712000	14472000	11422000	12416000	7736600	15408000	5475600	0	6527300	10630000
AT1G71080.1	AT1G71080.1	RNA polymerase II transcription elongation factor	0.999979	S	136	46.9968	5.80911e-35	179.85	166.69	179.85	39010000	26984000	29870000	56313000	51335000	37679000	27133000	18112000	22637000	34591000	18764000	34274000	33503000	32092000	26052000	32118000	11616000	31351000	12522000	36674000
AT1G71090.1	AT1G71090.1	Auxin efflux carrier family protein	0.182451	S	242	0.477473	0.00182441	43.068	36.704	43.068	0	0	0	0	0	0	0	0	0	0	0	0	0	0	0	0	0	0	0	0
AT1G71090.1	AT1G71090.1	Auxin efflux carrier family protein	0.329778	S	256	0	0.00182441	43.068	36.704	43.068	0	0	0	0	0	0	0	0	0	0	0	0	0	0	0	0	0	0	0	0
AT1G71090.1	AT1G71090.1	Auxin efflux carrier family protein	0.329778	S	257	0	0.00182441	43.068	36.704	43.068	0	0	0	0	0	0	0	0	0	0	0	0	0	0	0	0	0	0	0	0
AT1G71090.1	AT1G71090.1	Auxin efflux carrier family protein	0.560166	S	258	4.1954	0.000742573	44.254	38.159	44.254	655500	0	619400	4737300	559360	0	2253900	164660	577990	605960	1041000	1812200	0	1144600	708680	0	0	1164600	0	804840
AT1G71090.1	AT1G71090.1	Auxin efflux carrier family protein	0.250443	T	241	0.60445	0.000742573	44.254	38.159	44.254	0	0	0	0	0	0	0	0	0	0	0	0	0	0	0	0	0	0	0	0
AT1G71190.2	AT1G71190.2	senescence associated gene 18 ; senescence associated gene 18	0.993997	S	232	24.2434	6.62912e-05	80.711	64.487	80.711	5288500	9936000	3055000	5272000	3223300	3722500	8917500	0	0	3999200	4113900	5549900	5213400	4124900	2811500	4528500	2576700	4043600	1965500	2908500
AT1G71530.1	AT1G71530.1	Protein kinase superfamily protein	0.974352	S	599	15.7966	0.0176528	42.338	31.999	42.338	0	0	0	1872900	813280	0	1892600	0	0	893460	537500	804760	1084500	560470	606940	0	0	777870	174410	382770
AT1G71530.1	AT1G71530.1	Protein kinase superfamily protein ; Protein kinase superfamily protein	0.853134	T	305	7.64096	3.10735e-05	88.338	71.241	47.559	8268400	21030000	0	11631000	11987000	0	24632000	7507300	8303600	14333000	0	11685000	0	8454600	8177700	17812000	4231900	9966000	9850900	8626600
AT1G71530.1	AT1G71530.1	Protein kinase superfamily protein	0.999762	T	490	36.2423	1.1077e-05	99.055	82.218	99.055	2833400	8577700	0	0	0	0	10211000	0	3599800	0	3991500	0	3953500	0	0	0	0	0	2983500	4677800
AT1G71710.2	AT1G71710.2	DNAse I-like superfamily protein ; DNAse I-like superfamily protein	0.997484	S	201	26.3326	0.00590795	58.04	51.81	58.04	0	3048800	2562400	3775500	2432400	2923800	3797300	2067000	3079900	2001900	2033600	4528000	3069500	2693700	2773600	3976600	1096100	3197900	1465500	2246600
AT1G71710.2	AT1G71710.2	DNAse I-like superfamily protein ; DNAse I-like superfamily protein	0.999986	S	205	53.2568	0.00590795	58.04	51.81	58.04	0	3048800	2562400	3775500	2432400	2923800	3797300	2067000	3079900	2001900	2033600	4528000	3069500	2693700	2773600	3976600	1096100	3197900	1465500	2246600
AT1G71860.2	AT1G71860.2	protein tyrosine phosphatase 1 ; protein tyrosine phosphatase 1 ; protein tyrosine phosphatase 1	0.912688	S	26	12.0069	6.19856e-06	94.09	69.235	86.467	4940900	5377900	3726100	7133200	0	0	3590100	2644800	3567400	2937200	3287000	6396000	5456500	4274400	4089200	4759600	1669300	3761300	2015200	3737200
AT1G71860.2	AT1G71860.2	protein tyrosine phosphatase 1 ; protein tyrosine phosphatase 1 ; protein tyrosine phosphatase 1	0.499978	S	29	0	6.19856e-06	94.09	69.235	94.09	4940900	5377900	0	0	0	0	0	0	0	2937200	0	6396000	0	0	0	0	0	0	0	0
AT1G71860.2	AT1G71860.2	protein tyrosine phosphatase 1 ; protein tyrosine phosphatase 1 ; protein tyrosine phosphatase 1	0.353317	S	7	0	0.00195941	61.375	51.004	51.092	0	0	0	0	0	0	0	0	0	0	0	0	0	0	0	0	0	0	0	0
AT1G71860.2	AT1G71860.2	protein tyrosine phosphatase 1 ; protein tyrosine phosphatase 1 ; protein tyrosine phosphatase 1	0.96251	S	8	17.1111	2.75206e-05	80.469	62.604	57.136	3676600	2057800	2165900	6333500	3643500	3798100	0	2236500	3305800	2496000	1478000	4410700	5110700	2871600	0	4173100	1686100	3598400	1772300	2179100
AT1G71860.2	AT1G71860.2	protein tyrosine phosphatase 1 ; protein tyrosine phosphatase 1 ; protein tyrosine phosphatase 1	0.733102	S	16	7.39969	0.00345062	60.401	42.888	60.401	2746400	0	0	0	0	0	0	0	0	0	0	0	0	0	0	0	0	0	0	0
AT1G71860.2	AT1G71860.2	protein tyrosine phosphatase 1 ; protein tyrosine phosphatase 1 ; protein tyrosine phosphatase 1	0.353317	T	6	0	0.00195941	61.375	51.004	51.092	0	0	0	0	0	0	0	0	0	0	0	0	0	0	0	0	0	0	0	0
AT1G71880.1	AT1G71880.1	sucrose-proton symporter 1	0.852841	S	20	7.665	6.78073e-05	78.717	65.679	78.717	0	2603300	0	0	0	0	0	0	0	0	0	0	0	0	0	0	0	9775300	0	0
AT1G71880.1	AT1G71880.1	sucrose-proton symporter 1	0.821224	T	18	6.6522	4.20388e-05	83.09	66.791	47.204	4276100	0	0	5383800	6895600	4139600	4977800	2960000	0	3436100	3586600	7101600	6496300	0	0	0	0	0	0	0
AT1G71900.1	AT1G71900.1	Protein of unknown function (DUF803)	0.99998	S	339	46.9356	0.000237795	63.073	49.482	63.073	0	0	0	0	0	0	0	0	0	0	0	0	0	0	0	0	0	0	0	0
AT1G71940.1	AT1G71940.1	SNARE associated Golgi protein family ; SNARE associated Golgi protein family	0.999958	S	17	44.0164	3.84944e-05	87.511	76.051	87.511	0	3194700	0	17315000	11796000	24067000	0	0	0	6027700	0	0	5882200	2056100	6448200	7644800	0	5159800	0	10343000
AT1G71940.1	AT1G71940.1	SNARE associated Golgi protein family ; SNARE associated Golgi protein family	0.961857	S	22	14.0171	3.84944e-05	87.511	76.051	76.21	0	3194700	0	0	0	8952300	0	0	0	0	0	0	5882200	2056100	0	7644800	0	5159800	0	3674300
AT1G72150.1	AT1G72150.1	PATELLIN 1	0.813606	S	194	6.43802	0.000265237	87.388	75.103	77.221	0	0	0	11791000	0	0	0	0	0	0	0	0	0	0	0	0	0	0	0	9049700
AT1G72150.1	AT1G72150.1	PATELLIN 1	0.631243	S	195	2.68384	0.000265237	87.388	75.103	52.862	9660900	0	0	0	0	0	13050000	0	9564700	0	0	0	0	0	10855000	0	0	0	0	0
AT1G72150.1	AT1G72150.1	PATELLIN 1	1	S	45	72.6522	0.000268041	96.229	77.499	72.652	3393800	4289000	4079200	0	0	4686200	5376600	2375700	2436700	3475800	0	5180900	4220900	2688700	4234800	5804900	1817600	0	2525800	3558700
AT1G72150.1	AT1G72150.1	PATELLIN 1	0.499535	S	168	0	0.00109112	52.321	44.556	52.321	0	0	0	0	0	0	0	0	0	0	0	0	0	0	0	0	0	0	0	0
AT1G72150.1	AT1G72150.1	PATELLIN 1	0.499535	S	169	0	0.00109112	52.321	44.556	52.321	0	0	0	0	0	0	0	0	0	0	0	0	0	0	0	0	0	0	0	0
AT1G72150.1	AT1G72150.1	PATELLIN 1	0.94764	S	178	12.5765	5.59765e-05	87.352	65.818	87.352	5653100	4428300	2186200	0	6383900	3855200	5655400	4763200	5344200	2851400	4420100	7803300	4157400	2642500	4350900	5374600	1659600	6616900	2761600	0
AT1G72150.1	AT1G72150.1	PATELLIN 1	0.996995	T	32	25.209	0.00103518	67.153	47.367	49.5	4623900	4557300	3529100	7291700	4520900	4217000	5535300	3272900	4033100	3609800	2809900	5617000	4101000	4595400	3571300	5579000	1897100	5777400	2593400	0
AT1G72150.1	AT1G72150.1	PATELLIN 1	0.784949	T	176	5.63208	0.0015806	65.855	43.701	41.798	0	4428300	0	0	0	0	5655400	0	0	0	4420100	0	0	0	0	0	0	0	0	4228000
AT1G72160.1	AT1G72160.1	Sec14p-like phosphatidylinositol transfer family protein	0.83637	S	18	7.21957	1.77208e-36	162.61	150.12	162.61	0	0	3554300	0	0	0	6925400	0	0	9159400	0	0	3031400	4246500	0	44002000	0	0	955490	0
AT1G72160.1	AT1G72160.1	Sec14p-like phosphatidylinositol transfer family protein	0.489415	S	20	0	4.43393e-07	73.109	63.9	73.109	0	0	0	0	0	0	0	0	0	0	0	0	0	0	0	0	0	0	0	0
AT1G72160.1	AT1G72160.1	Sec14p-like phosphatidylinositol transfer family protein	1	S	108	77.3417	3.86986e-92	237.81	218.49	86.699	40741000	42428000	39909000	35631000	28094000	61483000	54522000	40261000	39575000	35182000	26401000	63337000	75699000	46473000	29424000	111780000	11768000	89622000	10232000	26038000
AT1G72160.1	AT1G72160.1	Sec14p-like phosphatidylinositol transfer family protein	0.356879	S	113	0	0.0140702	45.704	31.009	43.598	0	0	0	0	0	0	0	0	0	0	0	0	0	0	0	0	0	0	0	0
AT1G72160.1	AT1G72160.1	Sec14p-like phosphatidylinositol transfer family protein	0.356879	S	114	0	0.0140702	45.704	31.009	43.598	0	0	0	0	0	0	0	0	0	0	0	0	0	0	0	0	0	0	0	0
AT1G72340.1	AT1G72340.1	NagB/RpiA/CoA transferase-like superfamily protein	0.900069	S	5	9.54578	1.80515e-05	87.001	55.158	84.507	0	0	0	0	49742000	0	0	0	35258000	0	0	0	0	0	0	0	0	0	0	0
AT1G72340.1	AT1G72340.1	NagB/RpiA/CoA transferase-like superfamily protein	0.998667	S	7	28.745	3.21697e-31	156.36	114.03	113.22	36594000	22630000	27573000	74557000	0	51011000	31147000	19948000	0	22021000	23171000	43797000	35114000	43540000	29318000	36768000	15674000	48015000	14858000	29233000
AT1G72340.1	AT1G72340.1	NagB/RpiA/CoA transferase-like superfamily protein	0.99985	S	18	41.8012	2.2398e-05	85.536	75.012	78.814	10462000	6015800	12230000	10363000	7457000	8579600	5339300	7707700	10947000	5113800	6396400	11303000	8326000	10624000	8333600	9335000	3832500	10764000	4528700	9069500
AT1G72370.2	AT1G72370.2	40s ribosomal protein SA ; 40s ribosomal protein SA	0.999689	S	6	35.3776	3.01019e-07	117.08	91.38	117.08	6016300	3116300	6145100	0	0	5897600	0	3331300	3462200	4011400	2991800	7559500	5897900	4880500	3036600	7407700	4118600	5778200	0	5616000
AT1G72390.1	AT1G72390.1	CONTAINS InterPro DOMAIN/s: Spt20 family (InterPro:IPR021950); Has 8778 Blast hits to 7244 proteins in 477 species: Archae - 6; Bacteria - 326; Metazoa - 4198; Fungi - 1506; Plants - 923; Viruses - 22; Other Eukaryotes - 1797 (source: NCBI BLink).	0.999315	S	27	31.6408	1.18048e-41	185.95	152.89	163.33	20007000	14381000	14329000	31833000	25375000	29625000	17937000	11648000	18255000	15120000	13760000	25817000	23591000	20843000	14466000	22407000	7333100	21673000	8469200	18894000
AT1G72390.1	AT1G72390.1	CONTAINS InterPro DOMAIN/s: Spt20 family (InterPro:IPR021950); Has 8778 Blast hits to 7244 proteins in 477 species: Archae - 6; Bacteria - 326; Metazoa - 4198; Fungi - 1506; Plants - 923; Viruses - 22; Other Eukaryotes - 1797 (source: NCBI BLink).	0.919302	S	547	11.4455	4.15467e-05	76.82	59.982	76.82	3894500	1998900	3405900	6114300	3886600	5258200	3043800	0	0	3571800	2064300	5787100	3990700	4537100	3400200	3413900	1401700	4960800	1183600	4595000
AT1G72390.1	AT1G72390.1	CONTAINS InterPro DOMAIN/s: Spt20 family (InterPro:IPR021950); Has 8778 Blast hits to 7244 proteins in 477 species: Archae - 6; Bacteria - 326; Metazoa - 4198; Fungi - 1506; Plants - 923; Viruses - 22; Other Eukaryotes - 1797 (source: NCBI BLink).	0.999977	S	1259	46.3573	6.05393e-07	102.4	70.146	102.4	8343000	4216500	0	10639000	6596100	9625700	7352600	5455500	6917600	3859900	3482500	8609200	6131500	6068000	5296300	6816200	3789200	9604900	873460	4088500
AT1G72410.1	AT1G72410.1	COP1-interacting protein-related ; COP1-interacting protein-related	1	S	741	78.0339	6.97301e-29	179.81	152.16	142.88	0	0	0	32196000	21441000	22978000	0	7349800	0	6861500	0	12820000	16305000	10446000	3349300	9797500	2317400	9201700	0	6176700
AT1G72410.1	AT1G72410.1	COP1-interacting protein-related ; COP1-interacting protein-related	1	S	649	75.9688	2.48052e-32	177.36	126.88	145	15013000	8321700	7447600	22721000	13843000	9057300	10943000	3804000	9120100	10960000	9122400	13371000	14355000	9110300	8869000	10692000	3282800	9764200	4426600	9558400
AT1G72410.1	AT1G72410.1	COP1-interacting protein-related ; COP1-interacting protein-related	0.655583	S	308	2.79587	1.91097e-10	116.51	59.491	104.55	29681000	0	14697000	0	22575000	22320000	0	0	20971000	0	0	14992000	26806000	21333000	0	0	0	0	0	0
AT1G72410.1	AT1G72410.1	COP1-interacting protein-related ; COP1-interacting protein-related	0.807871	S	309	6.23928	3.09738e-16	138.55	88.4	138.55	29681000	0	14697000	24107000	22575000	22320000	0	10252000	0	0	0	0	0	21333000	0	0	8180400	20848000	0	18656000
AT1G72410.1	AT1G72410.1	COP1-interacting protein-related ; COP1-interacting protein-related	0.965315	S	477	14.4583	0.00318917	54.524	32.293	54.524	1231800	1940400	0	5412800	3425400	3737000	3154700	1939500	0	0	0	5498400	4289300	0	2047400	3471400	647410	3571800	523380	2513200
AT1G72410.1	AT1G72410.1	COP1-interacting protein-related ; COP1-interacting protein-related	0.827265	S	377	6.80539	0.0139883	47.894	22.157	47.302	0	2789000	3585700	0	0	0	0	0	0	2577900	0	0	0	2989500	0	0	0	0	0	0
AT1G72410.1	AT1G72410.1	COP1-interacting protein-related ; COP1-interacting protein-related	0.605025	S	379	1.85236	0.011529	50.292	24.556	50.292	3562500	0	0	4531800	2788200	2826100	947420	3736600	3548900	0	2421900	4585700	2328600	0	3457600	0	2427100	0	0	7377400
AT1G72630.1	AT1G72630.1	ELF4-like 2	0.498704	S	95	0.147185	0.000161218	80.534	43.687	80.534	0	0	0	0	0	0	0	0	0	0	0	0	0	0	0	0	0	0	0	0
AT1G72680.1	AT1G72680.1	cinnamyl-alcohol dehydrogenase	0.630911	S	24	6.50438	0.014404	42.789	32.557	42.789	0	0	0	0	0	0	0	0	0	0	0	0	0	0	0	0	0	0	0	0
AT1G72690.1	AT1G72690.1	unknown protein; BEST Arabidopsis thaliana protein match is: unknown protein (TAIR:AT1G17490.1); Has 59 Blast hits to 45 proteins in 9 species: Archae - 0; Bacteria - 0; Metazoa - 0; Fungi - 0; Plants - 59; Viruses - 0; Other Eukaryotes - 0 (source: NCBI	0.999889	S	14	39.5398	0.00312112	59.198	33.187	59.198	0	2032000	0	4314800	2861200	0	5120800	0	0	3457300	1993900	0	0	0	3645600	0	0	0	0	0
AT1G72710.1	AT1G72710.1	casein kinase 1-like protein 2	0.341415	S	376	1.91792	0.00085033	62.408	49.419	62.408	0	0	0	0	0	0	0	0	0	0	0	0	0	0	0	0	0	0	0	0
AT1G72710.1	AT1G72710.1	casein kinase 1-like protein 2	0.319955	S	377	0	0.000579806	66.262	51.386	57.019	0	0	0	0	0	0	0	0	0	0	0	0	0	0	0	0	0	0	0	0
AT1G72710.1	AT1G72710.1	casein kinase 1-like protein 2	0.461334	S	378	0	2.98486e-05	87.363	72.463	75.479	0	0	0	0	0	0	0	0	0	0	0	0	0	0	0	0	0	0	0	0
AT1G72710.1	AT1G72710.1	casein kinase 1-like protein 2	0.844146	S	379	8.02207	2.98486e-05	87.363	72.463	75.479	3181500	2422100	0	0	0	0	0	0	0	0	0	0	0	0	0	0	0	0	0	0
AT1G72730.1	AT1G72730.1	DEA(D/H)-box RNA helicase family protein	0.638285	S	148	2.46648	2.83158e-05	88.021	68.259	88.021	0	0	12338000	0	0	0	0	0	0	0	14956000	11222000	12964000	0	0	0	0	0	0	0
AT1G72730.1	AT1G72730.1	DEA(D/H)-box RNA helicase family protein	0.967668	T	147	14.7609	8.59225e-08	135.47	106.56	135.47	20385000	15555000	23459000	54834000	75101000	24006000	33257000	7603200	8404400	11335000	23179000	10262000	27690000	25121000	10900000	0	0	17060000	9555900	7530000
AT1G72790.1	AT1G72790.1	hydroxyproline-rich glycoprotein family protein	0.49399	S	116	0	0.010186	57.836	34.919	57.836	0	0	0	0	0	0	0	0	0	0	0	0	0	0	0	0	0	0	0	0
AT1G72790.1	AT1G72790.1	hydroxyproline-rich glycoprotein family protein	0.953241	S	158	14.8529	0.000126959	80.746	47.543	62.042	3735900	4123200	0	8876400	4810200	5511300	4410100	0	3943800	3354300	2736500	5734100	4081900	6652200	3243300	6125400	1312000	5372400	1146000	3397100
AT1G72790.1	AT1G72790.1	hydroxyproline-rich glycoprotein family protein	0.684242	S	160	1.17307	0.0189286	43.382	16.841	43.382	0	0	0	0	0	0	0	0	3943800	0	0	0	4081900	0	0	0	0	0	0	0
AT1G72790.1	AT1G72790.1	hydroxyproline-rich glycoprotein family protein	0.859524	S	161	7.67422	0.000126959	80.746	47.543	69.716	3735900	4123200	0	8876400	4810200	5511300	4410100	0	3943800	3354300	2736500	5734100	0	6652200	3243300	6125400	1312000	5372400	1146000	3397100
AT1G72790.1	AT1G72790.1	hydroxyproline-rich glycoprotein family protein	0.999965	S	264	44.8064	1.43412e-05	93.411	81.995	91.113	9997800	5626500	7055400	10068000	8353800	9388900	7386700	4290200	5886900	6119700	4883000	22300000	7197900	5953300	7832700	6467000	1993200	8803100	1908100	5460900
AT1G72790.1	AT1G72790.1	hydroxyproline-rich glycoprotein family protein	1	S	268	68.5806	1.43412e-05	93.411	81.995	91.113	9997800	5626500	7055400	10068000	8353800	9388900	7386700	4290200	5886900	6119700	4883000	22300000	7197900	5953300	7832700	6467000	1993200	8803100	1908100	5460900
AT1G72790.1	AT1G72790.1	hydroxyproline-rich glycoprotein family protein	0.738283	T	115	7.35817	0.010186	57.836	34.919	53.237	13136000	0	0	0	0	0	0	0	0	0	0	0	0	0	0	0	0	0	0	0
AT1G72880.2	AT1G72880.2	Survival protein SurE-like phosphatase/nucleotidase ; Survival protein SurE-like phosphatase/nucleotidase	0.488302	T	238	1.35151	0.00237656	60.55	47.15	60.55	0	0	0	0	0	0	0	0	0	0	0	0	0	0	0	0	0	0	0	0
AT1G73020.2	AT1G73020.2	unknown protein; FUNCTIONS IN: molecular_function unknown; INVOLVED IN: biological_process unknown; LOCATED IN: cellular_component unknown; EXPRESSED IN: 22 plant structures; EXPRESSED DURING: 13 growth stages; CONTAINS InterPro DOMAIN/s: Protein of unkno	0.99836	S	645	27.8456	2.46418e-19	145.65	133.22	145.65	0	0	0	0	5848900	1866900	0	2288900	5331300	6183900	0	0	0	7369900	5021200	19301000	2447200	0	0	0
AT1G73200.1	AT1G73200.1	Putative integral membrane protein conserved region (DUF2404)	0.932134	S	315	14.9608	0.00015431	80.975	68.829	70.413	6422400	8100400	4593600	7183800	6862100	0	6084500	3314900	3647100	0	0	12240000	0	4731600	3880000	8266500	1560900	0	0	5159700
AT1G73200.1	AT1G73200.1	Putative integral membrane protein conserved region (DUF2404)	0.332904	S	317	0	0.00201483	56.9	42.86	45.696	0	0	0	0	0	0	0	0	0	0	0	0	0	0	0	0	0	0	0	0
AT1G73200.1	AT1G73200.1	Putative integral membrane protein conserved region (DUF2404)	0.332904	S	318	0	0.00201483	56.9	42.86	45.696	0	0	0	0	0	0	0	0	0	0	0	0	0	0	0	0	0	0	0	0
AT1G73350.3	AT1G73350.3	unknown protein; FUNCTIONS IN: molecular_function unknown; INVOLVED IN: biological_process unknown; EXPRESSED IN: 25 plant structures; EXPRESSED DURING: 15 growth stages; Has 30201 Blast hits to 17322 proteins in 780 species: Archae - 12; Bacteria - 1396;	0.438777	S	102	0	0.0065137	51.927	33.094	51.927	0	0	0	0	0	0	0	0	0	0	0	0	0	0	0	0	0	0	0	0
AT1G73350.3	AT1G73350.3	unknown protein; FUNCTIONS IN: molecular_function unknown; INVOLVED IN: biological_process unknown; EXPRESSED IN: 25 plant structures; EXPRESSED DURING: 15 growth stages; Has 30201 Blast hits to 17322 proteins in 780 species: Archae - 12; Bacteria - 1396;	0.911208	S	103	10.3317	1.26359e-05	109.07	72.627	83.54	8857900	5550200	3651100	8699600	6813400	8064400	6698900	2354200	5021300	3769300	3615900	7384800	6295500	5282700	4340000	6427200	1638200	5406800	791260	0
AT1G73350.3	AT1G73350.3	unknown protein; FUNCTIONS IN: molecular_function unknown; INVOLVED IN: biological_process unknown; EXPRESSED IN: 25 plant structures; EXPRESSED DURING: 15 growth stages; Has 30201 Blast hits to 17322 proteins in 780 species: Archae - 12; Bacteria - 1396;	0.678413	S	105	3.28893	0.000101903	83.54	61.547	67.964	8857900	5550200	0	0	0	0	11031000	0	0	7533100	0	0	0	5282700	0	3301800	0	0	1184700	0
AT1G73350.3	AT1G73350.3	unknown protein; FUNCTIONS IN: molecular_function unknown; INVOLVED IN: biological_process unknown; EXPRESSED IN: 25 plant structures; EXPRESSED DURING: 15 growth stages; Has 30201 Blast hits to 17322 proteins in 780 species: Archae - 12; Bacteria - 1396;	0.991819	S	107	20.9806	1.26359e-05	109.07	72.627	98.507	0	0	3651100	8699600	6813400	8064400	0	2354200	5021300	0	3615900	7384800	6295500	0	4340000	6427200	1638200	5406800	791260	0
AT1G73460.1	AT1G73460.1	Protein kinase superfamily protein	0.765823	S	488	5.23357	0.0018772	49.528	42.275	49.528	1948700	1436800	1497700	2022100	1826200	2617300	0	738480	1298200	0	0	0	2065000	1702200	0	1727700	454660	1555500	0	1403500
AT1G73460.1	AT1G73460.1	Protein kinase superfamily protein ; Protein kinase superfamily protein	0.555349	S	621	0.96824	0.00027412	73.464	59.747	73.464	0	0	0	0	0	0	0	0	0	0	0	0	0	0	0	2125600	0	0	0	0
AT1G73460.1	AT1G73460.1	Protein kinase superfamily protein ; Protein kinase superfamily protein	0.78767	S	622	5.6985	4.77036e-05	104.21	88.819	104.21	3396500	0	2867800	0	3528700	5096300	2623000	1393000	3738700	1500900	0	4135500	0	0	0	0	1604800	2156400	0	0
AT1G73460.1	AT1G73460.1	Protein kinase superfamily protein ; Protein kinase superfamily protein	1	S	1168	125.839	5.47794e-39	190.26	173.23	190.26	5228400	5576600	4700600	17599000	7667000	12405000	7261200	3724900	5854600	7109300	7423600	11032000	8752400	8328800	4965000	51086000	3864500	8292400	2063500	7017100
AT1G73460.1;AT3G17750.1	AT1G73460.1	Protein kinase superfamily protein ; Protein kinase superfamily protein ; Protein kinase superfamily protein	0.48323	S	1021	0.696615	2.23016e-05	85.932	67.637	78.088	0	0	0	0	0	0	0	0	0	0	0	0	0	0	0	0	0	0	0	0
AT1G73460.1;AT3G17750.1	AT1G73460.1	Protein kinase superfamily protein ; Protein kinase superfamily protein ; Protein kinase superfamily protein	0.739209	S	1025	8.1536	0.00312749	49.865	33.464	49.865	0	0	0	0	0	0	0	0	0	3280800	0	0	0	0	0	0	0	0	0	0
AT1G73460.1;AT3G17750.1	AT1G73460.1	Protein kinase superfamily protein ; Protein kinase superfamily protein ; Protein kinase superfamily protein	0.316612	T	1016	0.773884	0.00143413	57.482	35.169	57.482	0	0	0	0	0	0	0	0	0	0	0	0	0	0	0	0	0	0	0	0
AT1G73590.1	AT1G73590.1	Auxin efflux carrier family protein	0.758626	S	337	5.73322	0.000757205	41.205	32.472	41.205	5365000	0	6187000	10713000	0	8536900	2554200	2726600	6687700	0	3251800	6660600	9546000	7991600	0	7642500	0	6838200	0	0
AT1G73590.1	AT1G73590.1	Auxin efflux carrier family protein	1	S	271	67.5792	3.35419e-05	86.8	70.909	67.579	7994700	3165800	7147600	11939000	5476500	12164000	0	4622900	9285500	0	3339800	8440400	10844000	0	3851200	11249000	451480	8279700	2487000	2744300
[truncated: 5,051 more rows]

## Sheet: Significant
Table S2. Phosphoproteome analysis of control and auxin-treated seedlings - differentially abundant proteins (statistics)
[truncated: 444 more rows]
[truncated: 14 more columns]

[truncated: 1 more sheets: Unique]
