# Supplementary material for: The Arabidopsis Root Tip (Phospho)Proteomes at Growth-Promoting versus Growth-Repressing Conditions Reveal Novel Root Growth Regulators
Source: Cells. 2021 Jul 2;10(7):1665. doi: 10.3390/cells10071665 (PMC8303113; doi:10.3390/cells10071665)
Supplement: Supplementary file 1 [file cells-10-01665-s001.zip › Nikonorova_Table S3.xlsx]

## Sheet: Table S3
Table S3. GO categorization for proteome data (potential growth promotion)
Locus	Gene Model(s)	GO term (GO ID)	category		code	GO Slim	Reference	Made by: date last modified
AT1G17180	2020312	AT1G17180	toxin catabolic process	toxin catabolic process, 2,4,6-trinitrotoluene catabolic process, glutathione metabolic process	GO:0009407	7444	proc	other metabolic processes | other cellular processes	TAS	Publication:501681713|PMID:12090627	TAIR	02/26/2004 00:00:00
AT1G17180	2020312	AT1G17180	2,4,6-trinitrotoluene catabolic process		GO:0046256	12902	proc	other metabolic processes | other cellular processes	IDA	Publication:501759798|PMID:24733884		2014-04-06
AT1G17180	2020312	AT1G17180	glutathione metabolic process		GO:0006749	5897	proc	other metabolic processes | other cellular processes	IBA	Communication:501741973		2017-10-05
AT1G20200	2198561	AT1G20200	embryo development ending in seed dormancy	embryo development ending in seed dormancy, regulation of protein catabolic process, ubiquitin-dependent protein catabolic process	GO:0009793	11994	proc	developmental processes	NAS	Communication:501718471	TAIR	02/22/2006 00:00:00
AT1G20200	2198561	AT1G20200	regulation of protein catabolic process		GO:0042176	11245	proc	protein metabolism | other metabolic processes	IEA	AnalysisReference:501756966		09/23/2017 00:00:00
AT1G20200	2198561	AT1G20200	ubiquitin-dependent protein catabolic process		GO:0006511	7522	proc	other cellular processes | protein metabolism | other metabolic processes	TAS	Publication:1445|PMID:10363660	TIGR	04/17/2003 00:00:00
AT1G49760	2012161	AT1G49760	regulation of translation	regulation of translation, viral process, response to cadmium ion	GO:0006417	5836	proc	other cellular processes | protein metabolism | other metabolic processes	IEA	AnalysisReference:501756968		09/23/2017 00:00:00
AT1G49760	2012161	AT1G49760	viral process		GO:0016032	7568	proc	other biological processes	IEA	AnalysisReference:501756968		09/23/2017 00:00:00
AT1G49760	2012160	AT1G49760.1	response to cadmium ion		GO:0046686	13588	proc	other biological processes	IEP	Publication:501718481|PMID:16502469		05/25/2010 00:00:00
AT1G72550	2030290	AT1G72550	phenylalanyl-tRNA aminoacylation	phenylalanyl-tRNA aminoacylation	GO:0006432	6710	proc	other metabolic processes | other cellular processes | protein metabolism	IEA	AnalysisReference:501756966		09/23/2017 00:00:00
AT2G32920	2059395	AT2G32920	cell redox homeostasis	cell redox homeostasis, response to endoplasmic reticulum stress, protein folding	GO:0045454	12159	proc	other cellular processes	IEA	AnalysisReference:501756966		09/23/2017 00:00:00
AT2G32920	2059395	AT2G32920	response to endoplasmic reticulum stress		GO:0034976	30280	proc	other cellular processes | response to stress	IEP	Publication:501725084|PMID:18574595	TAIR	09/21/2008 00:00:00
AT2G32920	2059395	AT2G32920	protein folding		GO:0006457	6884	proc	other cellular processes	IBA	Communication:501741973		01/13/2016 00:00:00
AT3G06720	2083313	AT3G06720	protein import into nucleus	protein import into nucleus, NLS-bearing protein import into nucleus, intracellular protein transport	GO:0006606	6920	proc	transport	IDA	Publication:1299|PMID:10428841		2016-01-08
AT3G06720	2083313	AT3G06720	NLS-bearing protein import into nucleus		GO:0006607	4865	proc	transport	IBA	Communication:501741973		09/17/2015 00:00:00
AT3G06720	2083313	AT3G06720	intracellular protein transport		GO:0006886	6091	proc	transport	ISS	Communication:501714663	TIGR	09/15/2003 00:00:00
AT3G12050	2088649	AT3G12050	response to stress	response to stress	GO:0006950	7330	proc	response to stress	IEA	AnalysisReference:501756966		09/23/2017 00:00:00
AT3G16810	2086760	AT3G16810	regulation of translation	regulation of translation	GO:0006417	5836	proc	other metabolic processes | protein metabolism | other cellular processes	IBA	Communication:501741973		01/13/2016 00:00:00
AT3G22890	2084562	AT3G22890.1	response to cadmium ion	response to cadmium ion, sulfate assimilation, hydrogen sulfide biosynthetic process, response to cytokinin, selenium compound metabolic process	GO:0046686	13588	proc	other biological processes	IEP	Publication:501720022|PMID:17075075		2008-03-10
AT3G22890	2084563	AT3G22890	sulfate assimilation		GO:0000103	7351	proc	other cellular processes | other metabolic processes	IBA	Communication:501741973		2017-10-05
AT3G22890	2084563	AT3G22890	hydrogen sulfide biosynthetic process		GO:0070814	32537	proc	other cellular processes | other metabolic processes	IEA	AnalysisReference:501757242		05/14/2017 00:00:00
AT3G22890	2084563	AT3G22890	response to cytokinin		GO:0009735	11401	proc	other biological processes	IDA	Publication:501757382|PMID:24064926		01/31/2014 00:00:00
AT3G22890	2084563	AT3G22890	selenium compound metabolic process		GO:0001887	19214	proc	other metabolic processes | other cellular processes	IMP	Publication:501716316|PMID:15941393	TAIR	2011-08-10
AT3G55220	2100646	AT3G55220	plant ovule development	plant ovule development, mRNA splicing, via spliceosome, pollen development	GO:0048481	19033	proc	developmental processes	IMP	Publication:501743119|PMID:21680607	TAIR	07/26/2011 00:00:00
AT3G55220	2100646	AT3G55220	mRNA splicing, via spliceosome		GO:0000398	17088	proc	other cellular processes | other metabolic processes	IBA	Communication:501741973		01/13/2016 00:00:00
AT3G55220	2100646	AT3G55220	pollen development		GO:0009555	11329	proc	developmental processes	IMP	Publication:501743119|PMID:21680607	TAIR	07/26/2011 00:00:00
AT3G57150	2080625	AT3G57150	snRNA pseudouridine synthesis	snRNA pseudouridine synthesis, box H/ACA snoRNA 3'-end processing, mRNA pseudouridine synthesis, rRNA pseudouridine synthesis	GO:0031120	19781	proc	other cellular processes | other metabolic processes	IBA	Communication:501741973		01/13/2016 00:00:00
AT3G57150	2080625	AT3G57150	box H/ACA snoRNA 3'-end processing		GO:0000495	28682	proc	other cellular processes | other metabolic processes	IBA	Communication:501741973		01/13/2016 00:00:00
AT3G57150	2080625	AT3G57150	mRNA pseudouridine synthesis		GO:1990481	46997	proc	other metabolic processes | other cellular processes	IBA	Communication:501741973		01/13/2016 00:00:00
AT3G57150	2080625	AT3G57150	rRNA pseudouridine synthesis		GO:0031118	19780	proc	other metabolic processes | other cellular processes	IBA	Communication:501741973		01/13/2016 00:00:00
AT4G01100	2125073	AT4G01100	transport	transport, mitochondrial transport, aerobic respiration, transmembrane transport	GO:0006810	7489	proc	transport	ISS	Communication:501714663	TIGR	2003-05-09
AT4G01100	2125073	AT4G01100	mitochondrial transport		GO:0006839	6381	proc	transport	ISS	Communication:501714663	TIGR	07/19/2002 00:00:00
AT4G01100	2125073	AT4G01100	aerobic respiration		GO:0009060	5059	proc	electron transport or energy pathways | other metabolic processes	IDA	Publication:501728943|PMID:18923018	TAIR	2008-11-12
AT4G01100	2125073	AT4G01100	transmembrane transport		GO:0055085	28452	proc	transport	IEA	AnalysisReference:501756966		01/23/2017 00:00:00
AT4G19210	2134761	AT4G19210	translational initiation	translational initiation, transport, translational termination, ribosomal subunit export from nucleus	GO:0006413	6906	proc	other cellular processes | other metabolic processes | protein metabolism	IBA	Communication:501741973		05/24/2016 00:00:00
AT4G19210	2134761	AT4G19210	transport		GO:0006810	7489	proc	transport	ISS	Publication:501680567|PMID:11346655		2017-07-10
AT4G19210	2134761	AT4G19210	translational termination		GO:0006415	6907	proc	other cellular processes | other metabolic processes | protein metabolism | cell organization and biogenesis	IBA	Communication:501741973		05/24/2016 00:00:00
AT4G19210	2134761	AT4G19210	ribosomal subunit export from nucleus		GO:0000054	7176	proc	DNA or RNA metabolism | transport	IBA	Communication:501741973		05/24/2016 00:00:00
AT4G25630	2131386	AT4G25630	RNA methylation	RNA methylation transcription, DNA-templated, rRNA processing, tRNA processing, histone glutamine methylation, box C/D snoRNA 3'-end processing	GO:0001510	4900	proc	other cellular processes | other metabolic processes	IGI	Publication:386|PMID:10829025	TIGR	04/17/2003 00:00:00
AT4G25630	2131386	AT4G25630	transcription, DNA-templated		GO:0006351	7470	proc	transcription,DNA-dependent	IEA	AnalysisReference:501756968		09/23/2017 00:00:00
AT4G25630	2131386	AT4G25630	rRNA processing		GO:0006364	7076	proc	other metabolic processes | other cellular processes	IGI	Publication:386|PMID:10829025	TAIR	05/23/2003 00:00:00
AT4G25630	2131386	AT4G25630	tRNA processing		GO:0008033	7397	proc	other metabolic processes | other cellular processes	IEA	AnalysisReference:501756966		09/23/2017 00:00:00
AT4G25630	2131386	AT4G25630	histone glutamine methylation		GO:1990258	46840	proc	other metabolic processes | other cellular processes | protein metabolism | cell organization and biogenesis	IBA	Communication:501741973		01/13/2016 00:00:00
AT4G25630	2131386	AT4G25630	box C/D snoRNA 3'-end processing		GO:0000494	28681	proc	other cellular processes | other metabolic processes	IBA	Communication:501741973		01/13/2016 00:00:00
AT4G26110	2120785	AT4G26110	cell differentiation	cell differentiation, nucleosome assembly, DNA repair, somatic cell DNA recombination, double-strand break repair via homologous recombination, cell proliferation	GO:0030154	9398	proc	other cellular processes	IMP	Publication:501720097|PMID:17041028		2016-01-08
AT4G26110	2120785	AT4G26110	nucleosome assembly		GO:0006334	6555	proc	cell organization and biogenesis	ISS	Communication:501714663	TIGR	2003-03-09
AT4G26110	2120785	AT4G26110	DNA repair		GO:0006281	4741	proc	other cellular processes | DNA or RNA metabolism | response to stress	IGI	Publication:501729815|PMID:19228338	TAIR	03/25/2009 00:00:00
AT4G26110	2120785	AT4G26110	somatic cell DNA recombination		GO:0016444	7270	proc	DNA or RNA metabolism	IMP	Publication:501748398|PMID:22534127		2016-01-08
AT4G26110	2120785	AT4G26110	double-strand break repair via homologous recombination		GO:0000724	14226	proc	response to stress | other cellular processes | DNA or RNA metabolism	IGI	Publication:501770780|PMID:27352805		07/26/2016 00:00:00
AT4G26110	2120785	AT4G26110	cell proliferation		GO:0008283	5334	proc	other biological processes	IMP	Publication:501720097|PMID:17041028		2016-01-08
AT4G27585	505006523	AT4G27585	mitochondrial respiratory chain supercomplex assembly	mitochondrial respiratory chain supercomplex assembly	GO:0097250	40252	proc	cell organization and biogenesis	IMP	Publication:501757576|PMID:24424325		10/21/2014 00:00:00
AT4G28480	2121368	AT4G28480	protein folding	protein folding	GO:0006457	6884	proc	other cellular processes	IEA	AnalysisReference:501756966		09/23/2017 00:00:00
AT4G34670	2139574	AT4G34670	translation	translation	GO:0006412	6869	proc	protein metabolism | other cellular processes | other metabolic processes	ISS	Publication:1545953|PMID:11598216	TIGR	04/17/2003 00:00:00
AT4G37910	2121022	AT4G37910	protein folding	protein folding, response to cadmium ion, response to salt stress, response to cytokinin	GO:0006457	6884	proc	other cellular processes	IEA	AnalysisReference:501756966		09/23/2017 00:00:00
AT4G37910	2121021	AT4G37910.1	response to cadmium ion		GO:0046686	13588	proc	other biological processes	IEP	Publication:501718481|PMID:16502469		05/25/2010 00:00:00
AT4G37910	2121021	AT4G37910.1	response to salt stress		GO:0009651	7182	proc	response to abiotic or biotic stimulus | response to stress	IEP	Publication:501723430|PMID:17916636		2008-03-10
AT4G37910	2121022	AT4G37910	response to cytokinin		GO:0009735	11401	proc	other biological processes	IDA	Publication:501757382|PMID:24064926		01/31/2014 00:00:00
AT4G39980	2005525	AT4G39980	chorismate biosynthetic process	chorismate biosynthetic process, aromatic amino acid family biosynthetic process, response to bacterium, response to wounding	GO:0009423	5390	proc	other cellular processes | other metabolic processes	IDA	Publication:501681778|PMID:12177500	TAIR	07/16/2007 00:00:00
AT4G39980	2005525	AT4G39980	aromatic amino acid family biosynthetic process		GO:0009073	5162	proc	other cellular processes | other metabolic processes	TAS	Publication:501681778|PMID:12177500	TAIR	2007-07-08
AT4G39980	2005525	AT4G39980	response to bacterium		GO:0009617	7120	proc	response to abiotic or biotic stimulus	IEP	Publication:5496|PMID:1681544	TIGR	04/17/2003 00:00:00
AT4G39980	2005525	AT4G39980	response to wounding		GO:0009611	7144	proc	response to stress	IEP	Publication:5496|PMID:1681544	TIGR	04/17/2003 00:00:00
AT5G03160	2143553	AT5G03160	viral process	viral processpositive regulation by host of viral processprotein folding	GO:0016032	7568	proc	other biological processes	IEA	AnalysisReference:501756968		09/23/2017 00:00:00
AT5G03160	2143553	AT5G03160	positive regulation by host of viral process		GO:0044794	47720	proc	other biological processes	IDA	Publication:501706007|PMID:12737801		2016-01-08
AT5G03160	2143553	AT5G03160	protein folding		GO:0006457	6884	proc	other cellular processes	ISS	Communication:501714663	TIGR	08/26/2003 00:00:00
AT5G42020	1005715854	AT5G42020.2	response to cadmium ion	response to cadmium ion, response to heat, polar nucleus fusion, response to cytokinin, protein folding, transcription, DNA-templated, response to cadmium ion, response to endoplasmic reticulum stress	GO:0046686	13588	proc	other biological processes	IEP	Publication:501718481|PMID:16502469		05/25/2010 00:00:00
AT5G42020	2165715	AT5G42020	response to heat		GO:0009408	5962	proc	response to stress | response to abiotic or biotic stimulus	IDA	Publication:3712|PMID:8888624	TIGR	04/17/2003 00:00:00
AT5G42020	2165715	AT5G42020	polar nucleus fusion		GO:0010197	17770	proc	developmental processes | other cellular processes | cell organization and biogenesis	IGI	Publication:501735950|PMID:20080634	TAIR	2010-09-02
AT5G42020	2165715	AT5G42020	response to cytokinin		GO:0009735	11401	proc	other biological processes	IDA	Publication:501757382|PMID:24064926		01/31/2014 00:00:00
AT5G42020	2165715	AT5G42020	protein folding		GO:0006457	6884	proc	other cellular processes	ISS	Communication:501714663	TIGR	2002-09-08
AT5G42020	2165715	AT5G42020	transcription, DNA-templated		GO:0006351	7470	proc	transcription,DNA-dependent	IEA	AnalysisReference:501756968		09/23/2017 00:00:00
AT5G42020	2165714	AT5G42020.1	response to cadmium ion		GO:0046686	13588	proc	other biological processes	IEP	Publication:501718481|PMID:16502469		05/25/2010 00:00:00
AT5G42020	2165715	AT5G42020	response to endoplasmic reticulum stress		GO:0034976	30280	proc	other cellular processes | response to stress	IEP	Publication:501725084|PMID:18574595	TAIR	09/21/2008 00:00:00
AT5G49910	2158834	AT5G49910	protein folding	protein folding, protein targeting to chloroplast, response to cadmium ion, response to heat	GO:0006457	6884	proc	other cellular processes	TAS	Publication:501680755|PMID:11402207	TIGR	04/17/2003 00:00:00
AT5G49910	2158834	AT5G49910	protein targeting to chloroplast		GO:0045036	11195	proc	transport	IMP	Publication:501737897|PMID:20484004	TAIR	2010-04-06
AT5G49910	2158833	AT5G49910.1	response to cadmium ion		GO:0046686	13588	proc	other biological processes	IEP	Publication:501718481|PMID:16502469		05/25/2010 00:00:00
AT5G49910	2158834	AT5G49910	response to heat		GO:0009408	5962	proc	response to abiotic or biotic stimulus | response to stress	IEP	Publication:501680755|PMID:11402207	TAIR	01/28/2005 00:00:00
AT5G60960	2173552	AT5G60960	RNA modification	RNA modification, regulation of translation, transcription, DNA-templated	GO:0009451	4901	proc	other cellular processes | other metabolic processes	IBA	Communication:501741973		11/20/2016 00:00:00
AT5G60960	2173552	AT5G60960	regulation of translation		GO:0006417	5836	proc	protein metabolism | other cellular processes | other metabolic processes	IEA	AnalysisReference:501756968		11/24/2016 00:00:00
AT5G60960	2173552	AT5G60960	transcription, DNA-templated		GO:0006351	7470	proc	transcription,DNA-dependent	IEA	AnalysisReference:501756968		11/24/2016 00:00:00
AT5G61020	2159391	AT5G61020	biological_process_unknown	unknown	GO:0008150	5239	proc	unknown biological processes	ND	Communication:1345790	TAIR	10/19/2006 00:00:00
