# Supplementary material for: The Arabidopsis Root Tip (Phospho)Proteomes at Growth-Promoting versus Growth-Repressing Conditions Reveal Novel Root Growth Regulators
Source: Cells. 2021 Jul 2;10(7):1665. doi: 10.3390/cells10071665 (PMC8303113; doi:10.3390/cells10071665)
Supplement: Supplementary file 1 [file cells-10-01665-s001.zip › Nikonorova_Table S4.xlsx]

## Sheet: Table S4
Table S4. GO categorization for proteome data (potential growth repression)
Locus	Gene Model(s)	GO term (GO ID)	cat		code	GO Slim	Reference	Made by: date last modified
AT1G01050	2200965	AT1G01050	phosphate-containing compound metabolic process	phosphate-containing compound metabolic process, lipid storage	GO:0006796	6719	proc	other cellular processes | other metabolic processes	IEA	AnalysisReference:501756966		09/27/2017 00:00:00
AT1G01050	2200965	AT1G01050	lipid storage		GO:0019915	10835	proc	other biological processes	IMP	Publication:501748689|PMID:22566496		05/17/2012 00:00:00
AT1G12240	2201966	AT1G12240	cellular response to gibberellin stimulus	cellular response to gibberellin stimulus, sucrose metabolic process, response to bacterium, primary root development, abscisic acid-activated signaling pathway	GO:0071370	33895	proc	other cellular processes	IEP	Publication:501712346|PMID:15056893		2016-01-08
AT1G12240	2201966	AT1G12240	sucrose metabolic process		GO:0005985	7347	proc	other metabolic processes | other cellular processes	IEA	AnalysisReference:501757242		09/23/2017 00:00:00
AT1G12240	2201966	AT1G12240	response to bacterium		GO:0009617	7120	proc	response to abiotic or biotic stimulus	IEP	Publication:501719312|PMID:16807755		2016-01-08
AT1G12240	2201966	AT1G12240	primary root development		GO:0080022	30849	proc	developmental processes	IMP	Publication:501718520|PMID:16481625		2016-01-08
AT1G12240	2201966	AT1G12240	abscisic acid-activated signaling pathway		GO:0009738	11414	proc	signal transduction | other cellular processes	IEA	AnalysisReference:501756968		09/23/2017 00:00:00
AT1G47600	2015338	AT1G47600	response to hormone	response to hormone, response to salt stress, carbohydrate metabolic process	GO:0009725	11393	proc	other biological processes	IBA	Communication:501741973		03/23/2016 00:00:00
AT1G47600	2015337	AT1G47600.1	response to salt stress		GO:0009651	7182	proc	response to stress | response to abiotic or biotic stimulus	IEP	Publication:501723430|PMID:17916636		2008-03-10
AT1G47600	2015338	AT1G47600	carbohydrate metabolic process		GO:0005975	5291	proc	other metabolic processes	IEA	AnalysisReference:501756966		03/17/2017 00:00:00
AT1G62660	2026177	AT1G62660	sucrose metabolic process	sucrose metabolic process, response to bacterium, cellular response to gibberellin stimulus, abscisic acid-activated signaling pathway, carbohydrate metabolic process	GO:0005985	7347	proc	other metabolic processes | other cellular processes	IEA	AnalysisReference:501757242		09/23/2017 00:00:00
AT1G62660	2026177	AT1G62660	response to bacterium		GO:0009617	7120	proc	response to abiotic or biotic stimulus	IEP	Publication:501719312|PMID:16807755		2016-01-08
AT1G62660	2026177	AT1G62660	cellular response to gibberellin stimulus		GO:0071370	33895	proc	other cellular processes	IEP	Publication:501712346|PMID:15056893		2016-01-08
AT1G62660	2026177	AT1G62660	abscisic acid-activated signaling pathway		GO:0009738	11414	proc	signal transduction | other cellular processes	IEA	AnalysisReference:501756968		09/23/2017 00:00:00
AT1G62660	2026177	AT1G62660	carbohydrate metabolic process		GO:0005975	5291	proc	other metabolic processes	IEA	AnalysisReference:501756966		2017-12-04
AT1G65310	2206335	AT1G65310	cell wall biogenesis	cell wall organization and biogenesis	GO:0042546	13564	proc	other cellular processes	IEA	AnalysisReference:501756966		09/23/2017 00:00:00
AT1G65310	2206335	AT1G65310	cell wall organization		GO:0071555	34184	proc	cell organization and biogenesis | other cellular processes	IEA	AnalysisReference:501756970		2017-10-05
AT1G76030	2204429	AT1G76030.1	response to cadmium ion	response to cadmium ion, glucose mediated signaling pathway, negative regulation of actin filament depolymerization, actin filament capping, actin filament bundle assembly, ATP hydrolysis coupled proton transport, ATP metabolic process	GO:0046686	13588	proc	other biological processes	IEP	Publication:501718481|PMID:16502469		05/25/2010 00:00:00
AT1G76030	2204430	AT1G76030	glucose mediated signaling pathway		GO:0010255	21550	proc	signal transduction | other cellular processes	IMP	Publication:501720456|PMID:17081979	TAIR	01/25/2007 00:00:00
AT1G76030	2204430	AT1G76030	negative regulation of actin filament depolymerization		GO:0030835	16949	proc	other cellular processes | cell organization and biogenesis	IDA	Publication:501747332|PMID:22371505	TAIR	03/30/2012 00:00:00
AT1G76030	2204430	AT1G76030	actin filament capping		GO:0051693	22224	proc	cell organization and biogenesis | other cellular processes	IDA	Publication:501747332|PMID:22371505	TAIR	03/30/2012 00:00:00
AT1G76030	2204430	AT1G76030	actin filament bundle assembly		GO:0051017	18751	proc	cell organization and biogenesis | other cellular processes	IDA	Publication:501747332|PMID:22371505	TAIR	03/30/2012 00:00:00
AT1G76030	2204430	AT1G76030	ATP hydrolysis coupled proton transport		GO:0015991	4696	proc	transport	IEA	AnalysisReference:501756966		09/23/2017 00:00:00
AT1G76030	2204430	AT1G76030	ATP metabolic process		GO:0046034	12794	proc	other metabolic processes | other cellular processes	IEA	AnalysisReference:501756966		09/23/2017 00:00:00
AT1G79340	2207350	AT1G79340	protein autoprocessing	positive regulation of programmed cell death, protein autoprocessing, defense response	GO:0016540	6868	proc	protein metabolism | other metabolic processes	IDA	Publication:501741408|PMID:21209078		2016-01-08
AT1G79340	2207350	AT1G79340	positive regulation of programmed cell death		GO:0043068	17980	proc	other cellular processes	IDA	Publication:501741408|PMID:21209078		2016-01-08
AT1G79340	2207350	AT1G79340	defense response		GO:0006952	5542	proc	response to stress	IEA	AnalysisReference:501756968		09/23/2017 00:00:00
AT2G16600	2045076	AT2G16600	protein folding	protein folding, signal transduction, protein peptidyl-prolyl isomerization	GO:0006457	6884	proc	other cellular processes	ISS	Communication:501714663	TIGR	2003-09-09
AT2G16600	2045076	AT2G16600	signal transduction		GO:0007165	7243	proc	signal transduction	ISS	Publication:2893|PMID:9426607	TAIR	2002-08-11
AT2G16600	2045076	AT2G16600	protein peptidyl-prolyl isomerization		GO:0000413	25262	proc	other metabolic processes | other cellular processes | protein metabolism	IEA	AnalysisReference:501756966		09/23/2017 00:00:00
AT2G41220	2040317	AT2G41220	ammonia assimilation cycle	oxidation-reduction process, glutamate biosynthetic process, ammonia assimilation cycle	GO:0019676	10443	proc	other cellular processes | other metabolic processes	IBA	Communication:501741973		01/13/2016 00:00:00
AT2G41220	2040317	AT2G41220	oxidation-reduction process		GO:0055114	29342	proc	other metabolic processes	ISS	Publication:2574|PMID:9596633		2017-07-10
AT2G41220	2040317	AT2G41220	glutamate biosynthetic process		GO:0006537	5878	proc	other cellular processes | other metabolic processes	IBA	Communication:501741973		01/13/2016 00:00:00
AT3G08030	2077467	AT3G08030	biological_process_unknown	unknown	GO:0008150	5239	proc	unknown biological processes	ND	Communication:501683652	TIGR	09/13/2003 00:00:00
AT3G13790	2091606	AT3G13790	carbohydrate metabolic process	carbohydrate metabolic process, response to wounding, response to karrikin, defense response to fungus	GO:0005975	5291	proc	other metabolic processes	IEA	AnalysisReference:501756966		05/21/2017 00:00:00
AT3G13790	2091606	AT3G13790	response to karrikin		GO:0080167	35962	proc	response to abiotic or biotic stimulus	IEP	Publication:501736304|PMID:20351290	TAIR	09/27/2010 00:00:00
AT3G13790	2091606	AT3G13790	response to wounding		GO:0009611	7144	proc	response to stress	IMP	Publication:501718265|PMID:16339783	TAIR	2007-02-02
AT3G13790	2091606	AT3G13790	defense response to fungus		GO:0050832	18013	proc	response to abiotic or biotic stimulus | response to stress	IEP	Publication:501773992|PMID:28066461	TAIR	05/17/2017 00:00:00
AT3G53420	2084031	AT3G53420	water transport	transport, water transport, transport, hydrogen peroxide transmembrane transport, response to abscisic acid, response to water deprivation, response to salt stress	GO:0006833	7597	proc	transport	IDA	Publication:4792|PMID:7920711		2017-07-10
AT3G53420	2084031	AT3G53420	hydrogen peroxide transmembrane transport		GO:0080170	35958	proc	transport	IDA	Publication:501732521|PMID:18462192	TAIR	09/27/2010 00:00:00
AT3G53420	2084031	AT3G53420	response to abscisic acid		GO:0009737	11395	proc	other biological processes	IDA	Publication:501739724|PMID:20733066	TAIR	10/30/2010 00:00:00
AT3G53420	2084031	AT3G53420	response to water deprivation		GO:0009414	5647	proc	response to stress | response to abiotic or biotic stimulus	IEP	Publication:501717886|PMID:16235111	TAIR	06/16/2006 00:00:00
AT3G53420	2084031	AT3G53420	transmembrane transport		GO:0055085	28452	proc	transport	IDA	Publication:4792|PMID:7920711		2017-07-10
AT3G53420	2084031	AT3G53420	response to salt stress		GO:0009651	7182	proc	response to abiotic or biotic stimulus | response to stress | response to stress | response to abiotic or biotic stimulus	IEP	Publication:501717707|PMID:16183846	TAIR	06/16/2006 00:00:00
AT3G53420	2084031	AT3G53420	transport		GO:0006810	7489	proc	transport	ISS	Communication:501714663	TIGR	07/26/2002 00:00:00
AT4G14800	2130240	AT4G14800	ubiquitin-dependent protein catabolic process	ubiquitin-dependent protein catabolic process, response to cadmium ion	GO:0006511	7522	proc	protein metabolism | other metabolic processes | other cellular processes	TAS	Publication:1445|PMID:10363660	TIGR	04/17/2003 00:00:00
AT4G14800	2130240	AT4G14800	response to cadmium ion		GO:0046686	13588	proc	other biological processes	IEP	Publication:501735733|PMID:20005002	TAIR	05/25/2010 00:00:00
AT4G29350	2118324	AT4G29350	inflorescence development	cytoskeleton organization, inflorescence development, leaf development, lateral root development	GO:0010229	19795	proc	developmental processes	IMP	Publication:501765572|PMID:26160044	TAIR	2015-10-12
AT4G29350	2118324	AT4G29350	leaf development		GO:0048366	18907	proc	developmental processes	IMP	Publication:501765572|PMID:26160044	TAIR	2015-10-12
AT4G29350	2118324	AT4G29350	cytoskeleton organization		GO:0007010	5512	proc	cell organization and biogenesis	ISS	Communication:501714663	TIGR	08/27/2003 00:00:00
AT4G29350	2118324	AT4G29350	lateral root development		GO:0048527	20804	proc	developmental processes	IMP	Publication:501765572|PMID:26160044	TAIR	2015-10-12
AT5G05270	2153539	AT5G05270	flavonoid biosynthetic process	flavonoid biosynthetic process, response to karrikin	GO:0009813	5785	proc	other metabolic processes	IBA	Communication:501741973		10/20/2016 00:00:00
AT5G05270	2153539	AT5G05270	response to karrikin		GO:0080167	35962	proc	response to abiotic or biotic stimulus	IEP	Publication:501736304|PMID:20351290	TAIR	09/27/2010 00:00:00
AT5G15650	2143171	AT5G15650	cellulose biosynthetic process	cell wall organization, cellulose biosynthetic process, arabinose biosynthetic process, pollen development, response to cadmium ion, response to salt stress	GO:0030244	8923	proc	other metabolic processes | other cellular processes	IEA	AnalysisReference:501756966		09/23/2017 00:00:00
AT5G15650	2143171	AT5G15650	cell wall organization		GO:0071555	34184	proc	cell organization and biogenesis | other cellular processes	IEA	AnalysisReference:501756968		09/23/2017 00:00:00
AT5G15650	2143170	AT5G15650.1	response to cadmium ion		GO:0046686	13588	proc	other biological processes	IEP	Publication:501718481|PMID:16502469		05/25/2010 00:00:00
AT5G15650	2143171	AT5G15650	pollen development		GO:0009555	11329	proc	developmental processes	IGI	Publication:501720039|PMID:17071651		2016-01-08
AT5G15650	2143171	AT5G15650	arabinose biosynthetic process		GO:0019567	10489	proc	other metabolic processes	IMP	Publication:3070|PMID:9301086	TAIR	2016-03-06
AT5G15650	2143170	AT5G15650.1	response to salt stress		GO:0009651	7182	proc	response to stress | response to abiotic or biotic stimulus	IEP	Publication:501723430|PMID:17916636		2008-03-10
AT5G17820	2175951	AT5G17820	plant-type cell wall organization	oxidation-reduction process, response to oxidative stress, hydrogen peroxide catabolic process, plant-type cell wall organization	GO:0009664	5349	proc	other cellular processes | cell organization and biogenesis	IBA	Communication:501741973		2017-10-05
AT5G17820	2175951	AT5G17820	hydrogen peroxide catabolic process		GO:0042744	14968	proc	other cellular processes | other metabolic processes	IEA	AnalysisReference:501756970		05/14/2017 00:00:00
AT5G17820	2175951	AT5G17820	oxidation-reduction process		GO:0055114	29342	proc	other metabolic processes	IEA	AnalysisReference:501756970		05/14/2017 00:00:00
AT5G17820	2175951	AT5G17820	response to oxidative stress		GO:0006979	6625	proc	response to stress	IEA	AnalysisReference:501756966		05/14/2017 00:00:00
AT5G21274	1005716170	AT5G21274	calcium-mediated signaling	calcium-mediated signaling	GO:0019722	10040	proc	signal transduction	TAS	Publication:5196|PMID:8507825	TAIR	04/21/2004 00:00:00
AT5G23830	2172788	AT5G23830	intracellular sterol transport	intracellular sterol transport	GO:0032366	25226	proc	transport	IEA	AnalysisReference:501756966		09/23/2017 00:00:00
AT5G64100	2164426	AT5G64100	hydrogen peroxide catabolic process	oxidation-reduction process, response to oxidative stress, hydrogen peroxide catabolic process	GO:0042744	14968	proc	other cellular processes | other metabolic processes	IEA	AnalysisReference:501756968		09/23/2017 00:00:00
AT5G64100	2164426	AT5G64100	oxidation-reduction process		GO:0055114	29342	proc	other metabolic processes	IEA	AnalysisReference:501756968		09/23/2017 00:00:00
AT5G64100	2164426	AT5G64100	response to oxidative stress		GO:0006979	6625	proc	response to stress	IEA	AnalysisReference:501756966		09/23/2017 00:00:00
