# Supplementary material for: The Arabidopsis Root Tip (Phospho)Proteomes at Growth-Promoting versus Growth-Repressing Conditions Reveal Novel Root Growth Regulators
Source: Cells. 2021 Jul 2;10(7):1665. doi: 10.3390/cells10071665 (PMC8303113; doi:10.3390/cells10071665)
Supplement: Supplementary file 1 [file cells-10-01665-s001.zip › Nikonorova_Table S5.xlsx]

## Sheet: Table S5
Table S5. Normalised phosphoproteome. ANOVA (p<0.05) output after normalization of all identified phosphosites on all identified proteins. Phosphosites highlighted in red were also found as significantly regulated without normalization procedure.
Protein	Name	Description	Amino acid	Position	Replicates	Fold change	Mock 1	Mock 2	Mock 3	Mock 4	Mock 5		0.1 nM 1	0.1 nM 2	0.1 nM 3	0.1 nM 4	0.1 nM 5		10 nM 1	10 nM 2	10 nM 3	10 nM 4	10 nM 5		100 nM 1	100 nM 2	100 nM 3	100 nM 4	100 nM 5	Mock (average)	0.1 nM (average)	10 nM (average)	100 nM (average)	0.1 nM fold change	10 nM fold change	100 nM fold change	Multiplicity	ANOVA Significant	Localization prob	PEP	Score	Delta score	Score for localization	Mass error [ppm]	Intensity	ANOVA p value	ANOVA q-value	Mean	Std. dev.
AT1G17745	D-3-phosphoglycerate dehydrogenase 2 (PGDH2)	Involved in the plastidial phosphorylated pathway of serine biosynthesis (PPSB).	S	71			1.24534	0.57234	-0.350563	-1.50087	0.34954		-1.20265	-0.0511946	-0.224143	-0.0248621	-0.561604		2.6793	0.523255	1.11036	1.06179	0.882957		-0.478517	-0.647758	-0.287544	1.21837	0.0248621	0.0631574	-0.412891	1.25153	-0.0341174	-0.476048	1.18838	-0.0972748	___1		0.999989	5.1181e-202	318.41	297.98	302.9	-0.053582	2152300000	0.0260243	0.325143	2.89358	0.391157
AT1G20200	26S proteasome non-ATPase regulatory subunit 3 homolog A (RPN3A)	Acts as a regulatory subunit of the 26 proteasome which is involved in the ATP-dependent degradation of ubiquitinated proteins.	S	14			-3.50774	-0.318612	-1.29913	-0.191081	-0.167174		0.169152	NaN	-0.419656	0.498342	-0.362383		0.35	0.0826416	0	0.440467	-0.159005		-0.488968	0.9886	0.870959	0.757875	0.59973	-1.09675	-0.0286362	0.142821	0.545639	1.06811	1.23957	1.64239	___2		0.999998	4.58494e-95	245.78	183	238.8	-0.072016	874990000	0.0404976	0.3144	-2.2931	0.581428
AT1G35580	Alkaline/neutral invertase CINV1 (CINV1)	Cytosolic invertase that specifically cleaves sucrose into glucose and fructose and is involved in the regulation of multiple tissue development including primary root elongation, root hair growth, leaf and silique development, and floral transition. Is involved in osmotic stress-induced inhibition on lateral root growth by controlling the concentration of hexose in cells. May regulate sugar-medi…	S	44			0	0.207648	-0.0101105	-0.489261	0.143525		-1.64631	-1.67723	-1.9823	-2.25223	0.421947		0.531501	0.0845243	0.212456	0.0363082	0.565607		-0.820528	-1.19071	NaN	0.177272	-0.463468	-0.0296397	-1.42722	0.286079	-0.574358	-1.39758	0.315719	-0.544719	___1		0.998872	2.24154e-10	116.54	73.828	97.911	-2.7954	298520000	0.00379864	0.101	-0.5116	1.1127
AT1G35580	Alkaline/neutral invertase CINV1 (CINV1)	Cytosolic invertase that specifically cleaves sucrose into glucose and fructose and is involved in the regulation of multiple tissue development including primary root elongation, root hair growth, leaf and silique development, and floral transition. Is involved in osmotic stress-induced inhibition on lateral root growth by controlling the concentration of hexose in cells. May regulate sugar-medi…	S	14			0.816537	0.620072	0.392838	-0.195271	-0.380254		0.134559	1.04974	0.0982784	-1.33741	-1.28386		1.22251	0.641381	0.54448	1.15491	-0.232102		-1.23757	-0.0982784	-0.77796	-1.91698	-1.90623	0.250784	-0.267739	0.666236	-1.1874	-0.518523	0.415451	-1.43819	___1		0.999983	1.0133e-110	251.38	235.84	209.23	-0.42938	1746200000	0.00782445	0.165091	-0.9511	0.544372
AT1G35580	Alkaline/neutral invertase CINV1 (CINV1)	Cytosolic invertase that specifically cleaves sucrose into glucose and fructose and is involved in the regulation of multiple tissue development including primary root elongation, root hair growth, leaf and silique development, and floral transition. Is involved in osmotic stress-induced inhibition on lateral root growth by controlling the concentration of hexose in cells. May regulate sugar-medi…	S	61			0.512239	-0.510429	-0.592674	0.243567	NaN		1.33668	0.946016	1.24962	1.79323	NaN		0.0255025	-0.0302084	-1.83362	-0.693851	-0.0255025		0.0706792	-0.051385	0.13077	-2.13549	-0.420401	-0.0868243	1.33139	-0.511536	-0.481165	1.41821	-0.424712	-0.394341	___1		1	3.46547e-18	139.76	122.83	79.492	0.34633	199710000	0.00740609	0.174	-2.41653	1.38124
AT1G48920	Nucleolin 1 (NUCL1)	Involved in pre-rRNA processing and ribosome assembly (PubMed:17108323, PubMed:17286797, PubMed:17369435, PubMed:21124873). Is associated with intranucleolar chromatin and pre-ribosomal particles and plays a role in controlling activation and repression of a specific subset of rRNA genes located in distinctive nucleolar organizer regions. Binds specifically rDNA chromatin and may be required to m…	S	270			0.814488	1.82566	0.256365	1.84778	1.23854		-0.203359	-0.653222	-0.220109	-0.935727	0.503122		0.780552	-0.185521	0.804626	1.79021	-0.355779		-0.78106	0.17972	-0.849656	-0.17972	-1.52488	1.19657	-0.301859	0.566818	-0.631119	-1.49843	-0.629749	-1.82769	___1		0.998408	6.07359e-32	180.78	144.46	165.24	-0.40801	3950400000	0.00302982	0.0948571	-0.263025	0.689544
AT1G72150	Patellin-1 (PATL1)	Carrier protein that may be involved in membrane-trafficking events associated with cell plate formation during cytokinesis. Binds to some hydrophobic molecules and promotes their transfer between the different cellular sites. Binds to phosphoinositides with a preference for PtdIns5P, PtdIns(4,5)P2 and PtdIns3P.	T	32			0.377885	0.25576	-0.33753	0.488234	0.350893		-0.614063	-2.25342	-0.933334	-1.08404	NaN		0.712636	-2.18462	0.0243452	-0.942861	-0.317948		0	1.13895	0.606257	-0.954901	0.983613	0.227048	-1.22121	-0.54169	0.354784	-1.44826	-0.768738	0.127735	___1		0.996995	0.00103518	67.153	47.367	49.5	0.94021	81733000	0.0356471	0.307484	-3.3574	0.377893
AT1G76810		Putative translation initiation factor IF-2	S	696			0.627349	0.103536	-1.63854	0.632058	-0.514705		-2.32705	-1.32106	NaN	-0.549279	-0.714713		0.00254028	-0.259304	0.425358	-0.515696	0.937522		0.868499	0.141332	1.76246	-0.00254028	NaN	-0.15806	-1.22803	0.118084	0.692438	-1.06997	0.276144	0.850498	___1		0.996133	2.63775e-05	107.61	77.55	107.61	0.86653	52830000	0.0271287	0.324	-3.02653	0.403484
AT2G18960	ATPase 1 (AHA1)	The plasma membrane H+ ATPase of plants and fungi generates a proton gradient that drives the active transport of nutrients by H+-symport. The resulting external acidification and/or internal alkinization may mediate growth responses. Forms a functional cation-translocating unit with CNGC17 that is activated by PSKR1/BAK1 and possibly other BAK1/RLK complexes (PubMed:26071421).	T	881			-0.045309	-0.543247	-0.492143	-0.43847	-0.199149		0.655861	1.52595	0.77157	2.51392	0.372482		-1.82039	-0.193946	0.045309	-0.814377	0.877401		0.176758	-1.4977	-0.76077	0.482132	0.737588	-0.343664	1.16796	-0.381201	-0.172398	1.51162	-0.037537	0.171265	___1		1	3.40315e-09	134.06	117.38	50.358	-0.49457	399020000	0.024949	0.3276	1.7042	0.759231
AT2G32730	26S proteasome non-ATPase regulatory subunit 1 homolog A (RPN2A)	Acts as a regulatory subunit of the 26 proteasome which is involved in the ATP-dependent degradation of ubiquitinated proteins.	S	896			-0.62185	-0.141583	-0.996798	0.19089	-0.950722		0.804046	2.00179	-0.0661964	1.03431	1.67404		0.266649	-1.85226	0.25572	-1.19713	1.68658		-0.391342	-0.0291861	-0.104946	0.343775	0.0291861	-0.504013	1.0896	-0.168088	-0.0305026	1.59361	0.335924	0.47351	___1		1	4.69648e-93	247.5	219.14	218.28	-0.5813	1387300000	0.0482362	0.358919	1.61875	0.402589
AT2G34357		ARM repeat superfamily protein	S	1130			0.172548	-0.118972	-0.282111	0.297696	0.653965		-0.96654	-0.192485	-0.304047	0.118972	0.323101		-0.227476	2.2059	0.892734	0.904143	NaN		-0.891792	-2.58434	-0.92155	0.567809	NaN	0.144625	-0.2042	0.943825	-0.957468	-0.348825	0.7992	-1.10209	___1		1	9.61196e-61	211.43	189.07	45.14	-0.0038474	3426700000	0.037141	0.304242	2.1734	0.850198
AT2G46860	Soluble inorganic pyrophosphatase 3 (PPA3)		S	15			0	0.48544	-1.3137	-1.13477	-1.49838		-1.24466	-0.841641	-0.0447212	-0.260526	-0.738032		0.0512595	0.524931	0.237468	-1.14	NaN		1.3494	0.731669	1.67404	0.503834	1.6084	-0.692282	-0.625916	-0.0815854	1.17347	0.066366	0.610697	1.86575	___1		0.995377	7.4428e-289	355.45	335.44	287.37	0.33224	846350000	0.00170164	0.0744	1.6012	1.1471
AT3G05060	Probable nucleolar protein 5-2 (NOP5-2)	Required for 60S ribosomal subunit biogenesis.	S	477			0.455358	-0.343217	-0.00752912	0.629691	0.364274		-0.409082	-0.192635	-2.25047	-1.56942	-1.89642		0.662256	0.953014	0.00752912	0.0445013	-0.0993476		-1.83349	0.513143	-0.948607	0.572763	0.778069	0.219715	-1.26361	0.313591	-0.183624	-1.48332	0.0938752	-0.40334	___1		1	1.0659e-75	225.68	200.23	99.927	-2.9405	1419000000	0.0238831	0.331368	-1.87088	0.408415
AT3G05900		Uncharacterized protein	S	500			1.59069	0.817845	0.64774	3.46268	-0.0513667		-0.261945	-0.25256	-0.056562	0.154854	0.146391		0.578944	-0.659639	0.915969	-0.0857229	0.918232		-0.740837	-0.428112	-0.0810303	-0.0794382	0.0513667	1.29352	-0.0539644	0.333557	-0.25561	-1.34748	-0.959961	-1.54913	___1		0.98308	2.51061e-20	157.09	120.77	128.76	0.077728	4801500000	0.0291442	0.30624	1.02625	0.59669
AT3G16810	Pumilio homolog 24 (APUM24)	Sequence-specific RNA-binding protein that regulates translation and mRNA stability by binding the 3'-UTR of target mRNAs.	S	460			0.81596	0.193905	0.370733	0.666455	0.992272		-1.36777	-0.612389	-0.488983	-0.193905	-0.569664		0.831683	1.89246	0.570953	2.40664	-0.794758		-0.450962	-0.723164	-1.0437	0.84425	-0.576495	0.607865	-0.646542	0.981396	-0.390014	-1.25441	0.373531	-0.997879	___1		0.99877	1.54499e-19	145.52	126.96	145.52	-0.22912	176850000	0.0112042	0.197429	0.5211	0.775896
AT3G43300	Brefeldin A-inhibited guanine nucleotide-exchange protein 5 (BIG5)	Activates the ARF proteins by exchanging bound GDP for free GTP. Plays a role in vesicular protein sorting. Acts as the major regulator of early endosomal vesicle trafficking but is also involved in the endocytosis process. Target of hopM1, a conserved Pseudomonas syringae virulence protein that directs the protein to its own proteasome-mediated degradation. Plays a broad role in PAMP-triggered i…	S	1502			1.00429	1.29477	0.0019306	0.590521	0.325453		-1.17795	-0.219319	-0.659034	-0.419197	-0.38768		-0.0233012	1.48315	0.0312926	0.710485	1.05681		-0.856577	-2.24208	-1.54367	1.30303	-0.0019306	0.643393	-0.572636	0.651687	-0.668246	-1.21603	0.00829436	-1.31164	___1		0.954123	1.29666e-93	240.11	222.53	156.81	-0.98998	4651300000	0.028069	0.319652	1.89758	0.556838
AT3G44750	Histone deacetylase HDT1	Probably mediates the deacetylation of lysine residues on the N-terminal part of the core histones (H2A, H2B, H3 and H4). Histone deacetylation gives a tag for epigenetic repression and plays an important role in transcriptional regulation, cell cycle progression and developmental events. Required for histone H3 'Lys-9' deacetylation. Involved in rRNA gene silencing in nucleolar dominance. Seems …	S	229			NaN	0.648758	-0.175455	-1.05772	-1.06653		-0.774196	-0.153202	-0.505581	0.3771	-1.36276		NaN	-0.270137	0.153202	0.507786	0.698094		1.67378	0.555232	-0.199703	0.671222	2.64054	-0.412737	-0.483728	0.272236	1.06821	-0.070991	0.684973	1.48095	___1		0.996726	4.12983e-05	77.078	57.807	77.078	0.2765	85116000	0.0335996	0.309241	-2.76587	0.476333
AT3G63460	Protein transport protein SEC31 homolog B (SEC31B)	Required for protein transport from the endoplasmic reticulum to the Golgi apparatus.	S	471			-0.894049	0.649253	0	-1.13875	NaN		-2.15333	-1.52456	-0.466273	-1.47207	-0.331668		0.676595	0.831227	0.592466	0.498096	0.357912		-1.20917	-0.434268	0.494072	0.574086	1.38803	-0.345886	-1.18958	0.591259	0.16255	-0.843694	0.937146	0.508436	___1		0.921847	5.6325e-153	287.78	277.46	246.75	0.21447	302780000	0.0123136	0.191	-1.85495	0.546782
AT4G30190	ATPase 2 (AHA2)	The plasma membrane H+ ATPase of plants and fungi generates a proton gradient that drives the active transport of nutrients by H+-symport (PubMed:10748244, PubMed:12920605, PubMed:27013734). The resulting external acidification and/or internal alkinization may mediate growth responses (PubMed:10748244, PubMed:12920605). Involved in maintaining the membrane potential and delta-pH, together forming…	T	942			0.0373236	0.333577	-0.150814	-1.02375	-0.311974		-0.0372221	-0.630945	-1.82823	-0.17617	-0.908739		NaN	-0.479218	0.287632	0.782774	0.536826		0	1.96799	2.64102	0.062374	0.235096	-0.223127	-0.716261	0.282004	0.981296	-0.493134	0.505131	1.20442	___1		0.999449	2.17628e-41	186.74	156.19	186.74	-0.50542	192980000	0.0302943	0.308769	-4.2321	0.492991
AT4G30190	ATPase 2 (AHA2)	The plasma membrane H+ ATPase of plants and fungi generates a proton gradient that drives the active transport of nutrients by H+-symport (PubMed:10748244, PubMed:12920605, PubMed:27013734). The resulting external acidification and/or internal alkinization may mediate growth responses (PubMed:10748244, PubMed:12920605). Involved in maintaining the membrane potential and delta-pH, together forming…	S	899			0.855128	-0.471313	0.724562	0.90701	1.06839		-0.270089	0.0142606	0.58941	-0.82331	-0.0142606		0.992717	-0.320825	-0.458271	0.885512	0.486648		-1.05592	0.637279	-0.512733	-2.44485	-2.09242	0.616755	-0.100798	0.317156	-1.09373	-0.717553	-0.299599	-1.71048	___1		0.99999	1.02281e-13	143.97	123.88	143.97	0.0062589	2114700000	0.0223786	0.324667	-0.918325	0.348866
AT4G31700	40S ribosomal protein S6-1 (RPS6A)	May play an important role in controlling cell growth and proliferation through the selective translation of particular classes of mRNA.	S	247			1.26486	-0.44384	1.60713	2.02369	-0.0997394		0.12732	NaN	-0.909664	-0.78845	0.699193		1.16919	1.34129	-0.473864	0.913328	0.806159		-0.515184	0	-0.2695	-1.41152	-0.596401	0.87042	-0.2179	0.751221	-0.558521	-1.08832	-0.1192	-1.42894	___1		0.977853	7.99276e-09	113.53	80.47	95.264	0.38514	389810000	0.0330243	0.315286	-0.8206	0.49128
AT4G32720	La protein 1 (LA1)	Binds to the 3' poly(U) terminus of nascent RNA polymerase III transcripts, protecting them from exonuclease digestion and facilitating their folding and maturation.	T	275			1.64272	0.363501	-0.181261	1.09429	-0.0585858		-0.43762	-1.02005	-2.36092	-0.336593	0.317146		0.854569	1.01492	0.0585858	0.652026	0.129402		-1.67942	-1.23544	-1.10212	0.176858	-0.342586	0.572133	-0.767607	0.541901	-0.836542	-1.33974	-0.0302323	-1.40867	___1		1	1.6031e-227	325.79	291.78	325.79	-0.38233	2189700000	0.0105283	0.197231	0.87705	0.408803
AT4G34450	Coatomer subunit gamma (Gamma-COP)	The coatomer is a cytosolic protein complex that binds to dilysine motifs and reversibly associates with Golgi non-clathrin-coated vesicles, which further mediate biosynthetic protein transport from the ER, via the Golgi up to the trans Golgi network. Coatomer complex is required for budding from Golgi membranes, and is essential for the retrograde Golgi-to-ER transport of dilysine-tagged protein…	S	577			-0.399609	-1.20694	-1.5034	-1.75136	-0.539545		-0.370215	0.664874	-0.282396	0.86468	1.12129		0.622497	0.168969	0.0357055	1.72359	0.953761		0	-0.864859	1.44444	-0.984416	NaN	-1.08017	0.399647	0.700905	-0.101209	1.47982	1.78108	0.978962	___1		0.99974	0.000263366	74.46	61.033	72.29	-4.3985	84339000	0.0120852	0.199733	-4.8042	0.277271
AT4G37870	Phosphoenolpyruvate carboxykinase (PCKA)		S	62			-1.26427	0.393751	0.0514127	-0.430178	0.241237		1.35923	1.47275	1.89422	0.850674	1.11194		-0.123382	0.12904	-0.0514127	-0.290484	-0.827421		-0.440611	0.565009	-0.605237	-1.60635	-1.78114	-0.201609	1.33776	-0.232732	-0.773666	1.53937	-0.0311225	-0.572056	___1		0.999996	2.5894e-233	328.18	300.97	238.83	-0.1415	7673400000	0.000582981	0.052	1.07998	0.565522
AT4G39680		SAP domain-containing protein	T	421			-0.401632	0.674562	-0.599685	-1.03933	0.0329615		-1.02818	-0.534144	NaN	0.452408	0.941396		NaN	0.537764	0	1.69474	2.15172		-1.19022	-1.19975	0.153184	-0.91577	NaN	-0.266625	-0.04213	1.09606	-0.788139	0.224495	1.36268	-0.521514	___1		0.988982	1.7037e-227	328.73	306.9	271.73	-0.0063034	3109500000	0.0327699	0.324741	4.308	0.524859
AT4G39680		SAP domain-containing protein	T	417			-0.706051	0.173502	0.268139	-1.18975	-0.160405		-1.25084	-0.267756	1.18899	1.03002	-0.12886		NaN	0.707103	1.15209	2.00019	1.17379		-1.17541	-1.23774	0.12886	-0.833476	NaN	-0.322913	0.114311	1.25829	-0.779442	0.437224	1.58121	-0.456529	___1		0.999831	1.7037e-227	328.73	306.9	288.96	-0.090566	2618100000	0.00928732	0.185	2.7301	0.52305
AT4G39680		SAP domain-containing protein	S	311			-0.0677566	0.222863	0.20819	-0.235551	0.694742		-1.52189	-0.34025	0.842339	0	0.196192		NaN	1.41262	NaN	2.37269	1.26243		-1.06883	-0.723571	-1.11544	-0.23512	NaN	0.164497	-0.164722	1.68258	-0.78574	-0.329219	1.51808	-0.950238	___1		1	2.34411e-24	162.88	143.09	113.35	0.97868	245890000	0.00108646	0.055	1.70795	0.57928
AT5G04430	Binding to ToMV RNA 1 (BTR1)	Negative regulator of tomato mosaic virus (ToMV) multiplication, but has no effect on the multiplication of cucumber mosaic virus (CMV). Limits the spreading of the virus (PubMed:18762309). Isoform BTR1S: binds preferentially and directly to the 5'terminal region of ToMV genomic RNA, and affects the efficiency of translation rather than mRNA stability (PubMed:18762309).	S	11			1.19582	0.367839	0.468705	0.129353	1.3043		-1.36115	-0.880852	-1.77806	-1.55694	-0.540073		0.901786	-0.049184	0.049184	1.30953	0.0500166		-0.851234	-0.359513	-1.20022	0.749655	-1.26469	0.693203	-1.22341	0.452267	-0.5852	-1.91662	-0.240937	-1.2784	___1		1	1.2332e-152	280.25	263.83	227	-0.037908	903000000	0.000566846	0.074	-0.375375	0.42036
AT5G04430	Binding to ToMV RNA 1 (BTR1)	Negative regulator of tomato mosaic virus (ToMV) multiplication, but has no effect on the multiplication of cucumber mosaic virus (CMV). Limits the spreading of the virus (PubMed:18762309). Isoform BTR1S: binds preferentially and directly to the 5'terminal region of ToMV genomic RNA, and affects the efficiency of translation rather than mRNA stability (PubMed:18762309).	S	19			0.9224	0.244486	-0.0461495	0.0461495	1.10511		-1.26922	-1.40981	-0.860788	-1.5997	0.1435		0.43423	0.0867988	0.0937389	1.29396	-0.439235		-1.38701	-1.56774	-1.50381	0.483378	-0.997986	0.454399	-0.999204	0.293899	-0.994634	-1.4536	-0.160501	-1.44903	___1		1	1.00738e-39	192.09	165.61	161.37	-0.029429	8656800000	0.0040095	0.0946667	-0.359175	1.05906
AT5G04430	Binding to ToMV RNA 1 (BTR1)	Negative regulator of tomato mosaic virus (ToMV) multiplication, but has no effect on the multiplication of cucumber mosaic virus (CMV). Limits the spreading of the virus (PubMed:18762309). Isoform BTR1S: binds preferentially and directly to the 5'terminal region of ToMV genomic RNA, and affects the efficiency of translation rather than mRNA stability (PubMed:18762309).	S	19			0.633975	0.253642	-0.139933	0.463482	0.381016		-1.48945	-1.49341	-0.680203	-1.73506	NaN		0.538691	0.291246	0.139933	1.58445	NaN		-0.99329	-1.21958	-1.49685	0.314714	-0.716676	0.318436	-1.34953	0.63858	-0.822336	-1.66797	0.320144	-1.14077	___2		1	1.00738e-39	192.09	165.61	161.37	-0.029429	8656800000	0.00030523	0.072	-3.05587	1.06104
AT5G05170	Cellulose synthase A catalytic subunit 3 [UDP-forming] (CESA3)	Catalytic subunit of cellulose synthase terminal complexes ('rosettes'), required for beta-1,4-glucan microfibril crystallization, a major mechanism of the cell wall formation. Involved in the primary cell wall formation, especially in roots.	S	216			-0.44949	1.5523	-0.0404068	-0.750514	1.06416		-1.79708	-0.568746	-1.18509	-0.16309	0.437204		0.594653	1.04418	1.57695	0.0404068	1.43614		-1.06892	-1.43781	-0.122558	0.539747	0.0691554	0.27521	-0.65536	0.938466	-0.404077	-0.93057	0.663256	-0.679287	___1		0.999997	3.19634e-21	158.29	141.35	143.93	0.38894	875210000	0.0351447	0.314267	1.40833	0.59829
AT5G11200	DEAD-box ATP-dependent RNA helicase 56 (RH56)	ATP-dependent RNA helicase involved in pre-mRNA splicing. Required for the export of mRNA out of the nucleus. In addition to ssRNA and dsRNA, binds dsDNA, but not ssDNA.	S	27			0.945908	-1.02666	-0.0676272	-0.230423	0.642722		-0.153051	-0.240343	1.50093	-0.183627	0.0676272		0.76549	2.53547	1.13706	1.09015	0.521238		0.962946	-0.499532	-0.42111	-0.307095	-1.72978	0.052784	0.198307	1.20988	-0.398914	0.145523	1.1571	-0.451698	___1		1	2.3928e-121	260.68	244.43	214.16	0.67031	533750000	0.0415951	0.313889	-1.74477	0.428451
AT5G17920	5-methyltetrahydropteroyltriglutamate--homocysteine methyltransferase 1 (MS1)	Catalyzes the transfer of a methyl group from 5-methyltetrahydrofolate to homocysteine resulting in methionine formation.	S	702			-0.126278	-1.49627	0.549381	-1.57479	0.273437		-1.00939	-0.599953	-0.740734	-0.480585	0.451123		0.8396	0.557886	1.98134	1.18495	2.14946		-0.459778	-0.0421432	-0.170622	0.0421432	0.562593	-0.474904	-0.475908	1.34265	-0.0135614	-0.0010038	1.81755	0.461343	___1		1	4.9374e-76	226.74	198.19	204.81	0.62543	609650000	0.00214292	0.074	-6.59403	0.329234
AT5G27540	Mitochondrial Rho GTPase 1 (MIRO1)	Mitochondrial GTPase required to maintain proper development, morphology and intracellular distribution of mitochondria, which in turn are essential for the progress of embryonic cell division, development of haploid male and female gametes, and pollen tube growth.	S	14			1.47203	2.39298	0.589825	0.857565	0.437741		-0.776111	0.803246	-1.01894	-0.997144	-0.438087		0.958097	-0.171829	-0.385893	1.46293	-1.31742		0.171829	0.553101	-0.940551	-0.29579	-0.282988	1.15003	-0.485407	0.109177	-0.15888	-1.63544	-1.04085	-1.30891	___1		1	1.1525e-10	131.86	95.013	94.45	-3.9008	314710000	0.0359169	0.3005	-0.121725	1.01161
AT5G39570		Uncharacterized protein	S	186			0.583952	1.26003	0.258789	2.97532	0		NaN	0.0471802	-1.07771	-0.140396	-0.0732411		0.492713	0.931067	-0.857046	0.586345	-0.345346		-0.776834	0.206615	-0.605279	-0.9113	-1.34643	1.01562	-0.311042	0.161547	-0.686646	-1.32666	-0.854072	-1.70226	___1		0.88852	0.00490728	53.481	33.225	49.871	0.024649	354620000	0.0283444	0.309333	-0.7235	0.961209
AT5G45510		Probable disease resistance protein	T	293			-0.697989	-0.0643492	-0.283684	0.0643492	0.258983		-1.14158	-1.2582	-0.668834	0.214914	0.597095		0.410695	1.2966	0.930753	-0.127585	2.56618		-0.61417	-1.46802	-1.41255	0.0830435	0.876628	-0.144538	-0.451321	1.01533	-0.507014	-0.306783	1.15987	-0.362476	___1		1	3.6975e-161	284.51	230.51	200.97	0.58265	3420600000	0.0393177	0.313412	4.17342	0.740878
AT5G61790	Calnexin homolog 1 (CNX1)	Calcium-binding protein that interacts with newly synthesized glycoproteins in the endoplasmic reticulum. It may act in assisting protein assembly and/or in the retention within the ER of unassembled protein subunits. It seems to play a major role in the quality control apparatus of the ER by the retention of incorrectly folded proteins (By similarity).	S	508			1.62811	-0.109543	0.634931	0.595058	1.97264		-0.139773	-0.197629	-0.498459	-1.03557	0.546932		1.00752	0.109543	-0.163836	1.96135	0.193285		-1.00734	-1.63141	-1.00091	0.615994	-0.120054	0.944239	-0.2649	0.621572	-0.628744	-1.20914	-0.322667	-1.57298	___1		0.999871	7.22995e-93	249.14	190.31	194.75	0.25479	2005600000	0.022179	0.34	-0.5409	0.575574
[truncated: 11 more columns]
