# Supplementary material for: The Arabidopsis Root Tip (Phospho)Proteomes at Growth-Promoting versus Growth-Repressing Conditions Reveal Novel Root Growth Regulators
Source: Cells. 2021 Jul 2;10(7):1665. doi: 10.3390/cells10071665 (PMC8303113; doi:10.3390/cells10071665)
Supplement: Supplementary file 1 [file cells-10-01665-s001.zip › Nikonorova_Table S6.xlsx]

## Sheet: Table S6
Table S6. GO categorization for phosphoproteome data (potential growth promotion)
Locus	Gene Model(s)	GO term (GO ID)	cat		code	GO Slim	Reference	Made by: date last modified
AT1G10450	2194559	AT1G10450	histone deacetylation		GO:0016575	6005	proc	cell organization and biogenesis | other cellular processes | other metabolic processes | protein metabolism	IBA	Communication:501741973		2015-08-04
AT1G10450	2194559	AT1G10450	regulation of transcription, DNA-templated		GO:0006355	7461	proc	transcription,DNA-dependent | other metabolic processes | other cellular processes	ISS	Communication:501714663	TIGR	2003-09-09
AT1G15340	2037863	AT1G15340	regulation of transcription, DNA-templated		GO:0006355	7461	proc	transcription,DNA-dependent | other metabolic processes | other cellular processes	IEA	AnalysisReference:501756968		09/23/2017 00:00:00
AT1G15340	2037863	AT1G15340	transcription, DNA-templated	transcription, DNA-templatedregulation of transcription, DNA-templated	GO:0006351	7470	proc	transcription,DNA-dependent	IEA	AnalysisReference:501756968		09/23/2017 00:00:00
AT1G32640	2035609	AT1G32640	abscisic acid-activated signaling pathway	abscisic acid-activated signaling pathway, indole glucosinolate biosynthetic process, jasmonic acid mediated signaling pathway, positive regulation of flavonoid biosynthetic process, positive regulation of transcription, DNA-templated, regulation of defense response to insect, regulation of sequence-specific DNA binding transcription factor activity, regulation of transcription from RNA polymeras…	GO:0009738	11414	proc	signal transduction | other cellular processes	IEA	AnalysisReference:501756968		09/23/2017 00:00:00
AT1G32640	2035609	AT1G32640	indole glucosinolate biosynthetic process		GO:0009759	11430	proc	other cellular processes | other metabolic processes	IMP	Publication:501722779|PMID:17616737	TAIR	2007-09-11
AT1G32640	2035609	AT1G32640	jasmonic acid mediated signaling pathway		GO:0009867	8850	proc	signal transduction | other cellular processes	IMP	Publication:501675203	TAIR	2004-12-08
AT1G32640	2035609	AT1G32640	positive regulation of flavonoid biosynthetic process		GO:0009963	13832	proc	other metabolic processes	IEP	Publication:501722779|PMID:17616737	TAIR	2007-09-11
AT1G32640	2035609	AT1G32640	positive regulation of transcription, DNA-templated		GO:0045893	12513	proc	other cellular processes | transcription,DNA-dependent | other metabolic processes	IDA	Publication:501741777|PMID:21321051	TAIR	2011-03-06
AT1G32640	2035609	AT1G32640	regulation of defense response to insect		GO:2000068	35737	proc	response to stress	IMP	Publication:501722779|PMID:17616737	TAIR	08/31/2010 00:00:00
AT1G32640	2035609	AT1G32640	regulation of sequence-specific DNA binding transcription factor activity		GO:0051090	19059	proc	other metabolic processes | other cellular processes | transcription,DNA-dependent	IMP	Publication:501722779|PMID:17616737	TAIR	12/14/2007 00:00:00
AT1G32640	2035609	AT1G32640	regulation of transcription from RNA polymerase II promoter in response to oxidative stress		GO:0043619	22784	proc	other metabolic processes | response to stress | transcription,DNA-dependent | other cellular processes	IMP	Publication:501722779|PMID:17616737	TAIR	2007-12-11
AT1G32640	2035609	AT1G32640	response to abscisic acid		GO:0009737	11395	proc	other biological processes	IEP	Publication:2977|PMID:9368419	TAIR	10/27/2003 00:00:00
AT1G32640	2035609	AT1G32640	response to chitin		GO:0010200	17780	proc	other biological processes	IEP	Publication:501722879|PMID:17722694	TAIR	2008-08-08
AT1G32640	2035609	AT1G32640	response to desiccation		GO:0009269	5575	proc	response to abiotic or biotic stimulus | response to stress	IEP	Publication:2977|PMID:9368419	TAIR	10/27/2003 00:00:00
AT1G32640	2035609	AT1G32640	response to jasmonic acid		GO:0009753	11419	proc	other biological processes	IMP	Publication:501741582|PMID:21242320	TAIR	2011-07-02
AT1G32640	2035609	AT1G32640	response to wounding		GO:0009611	7144	proc	response to stress	IEP	Publication:501723000|PMID:17675405	TAIR	02/17/2009 00:00:00
AT1G32640	2035609	AT1G32640	root development		GO:0048364	18902	proc	developmental processes	IMP	Publication:501722779|PMID:17616737	TAIR	2007-12-11
AT1G32640	2035609	AT1G32640	transcription, DNA-templated		GO:0006351	7470	proc	transcription,DNA-dependent	IEA	AnalysisReference:501756968		09/23/2017 00:00:00
AT1G32640	2035609	AT1G32640	tryptophan metabolic process		GO:0006568	7506	proc	other cellular processes | other metabolic processes	IMP	Publication:501722779|PMID:17616737	TAIR	2007-09-11
AT1G44800	2194864	AT1G44800	amino acid homeostasis		GO:0080144	34325	proc	other biological processes	IMP	Publication:501747275|PMID:22312005		2012-10-02
AT1G44800	2194864	AT1G44800	amino acid transport		GO:0006865	5101	proc	transport	IDA	Publication:501747275|PMID:22312005		2012-10-02
AT1G48920	2028451	AT1G48920	cotyledon vascular tissue pattern formation		GO:0010588	29504	proc	developmental processes	IMP	Publication:501721248|PMID:17369435	TAIR	2009-09-01
AT1G48920	2028451	AT1G48920	endonucleolytic cleavage involved in rRNA processing		GO:0000478	27822	proc	other metabolic processes | other cellular processes	IMP	Publication:501721248|PMID:17369435	TAIR	2009-09-01
AT1G48920	2028451	AT1G48920	leaf development		GO:0048366	18907	proc	developmental processes	IMP	Publication:501721248|PMID:17369435	TAIR	2009-09-01
AT1G48920	2028451	AT1G48920	leaf vascular tissue pattern formation		GO:0010305	25145	proc	developmental processes	IMP	Publication:501721248|PMID:17369435	TAIR	2009-09-01
AT1G48920	2028451	AT1G48920	petal vascular tissue pattern formation		GO:0080056	31836	proc	developmental processes	IMP	Publication:501721248|PMID:17369435	TAIR	04/22/2009 00:00:00
AT1G48920	2028451	AT1G48920	ribosome biogenesis		GO:0042254	11200	proc	other biological processes	TAS	Publication:501721021|PMID:17286797	TAIR	03/26/2007 00:00:00
AT1G48920	2028451	AT1G48920	root development		GO:0048364	18902	proc	developmental processes	IMP	Publication:501721248|PMID:17369435	TAIR	2009-09-01
AT1G48920	2028451	AT1G48920	rRNA processing		GO:0006364	7076	proc	other cellular processes | other metabolic processes	IMP	Publication:501721021|PMID:17286797	TAIR	03/26/2007 00:00:00
AT1G48920	2028451	AT1G48920	sepal vascular tissue pattern formation		GO:0080057	31837	proc	developmental processes	IMP	Publication:501721248|PMID:17369435	TAIR	04/22/2009 00:00:00
AT1G48920	2028451	AT1G48920	shoot system development		GO:0048367	18906	proc	developmental processes	IMP	Publication:501721248|PMID:17369435	TAIR	2009-09-01
AT1G52380	2018204	AT1G52380	intracellular transport		GO:0046907	14194	proc	transport	IEA	AnalysisReference:501756966		09/23/2017 00:00:00
AT1G52380	2018204	AT1G52380	mRNA transport		GO:0051028	18790	proc	DNA or RNA metabolism | transport	IEA	AnalysisReference:501756968		09/23/2017 00:00:00
AT1G52380	2018204	AT1G52380	protein transport		GO:0015031	6910	proc	transport	IEA	AnalysisReference:501756968		09/23/2017 00:00:00
AT1G61150	2008460	AT1G61150	unknown	unknown	GO:0008150	5239	proc	unknown biological processes	ND	Communication:1345790	TAIR	10/19/2006 00:00:00
AT1G78650	2202985	AT1G78650	DNA strand elongation involved in DNA replication		GO:0006271	4754	proc	other metabolic processes | other cellular processes | DNA or RNA metabolism	TAS	Publication:501722569|PMID:17556508	TAIR	2008-02-04
AT1G79280	2207390	AT1G79280	mitotic spindle assembly checkpoint		GO:0007094	6409	proc	cell organization and biogenesis | other cellular processes	IBA	Communication:501741973		11/26/2015 00:00:00
AT1G79280	2207390	AT1G79280	negative regulation of flower development		GO:0009910	9312	proc	developmental processes	IMP	Publication:501721563|PMID:17513499	TAIR	2007-11-07
AT1G79280	2207390	AT1G79280	negative regulation of protein sumoylation		GO:0033234	27193	proc	other metabolic processes | protein metabolism | other cellular processes	IMP	Publication:501721563|PMID:17513499	TAIR	2007-11-07
AT1G79280	2207390	AT1G79280	poly(A)+ mRNA export from nucleus		GO:0016973	6794	proc	DNA or RNA metabolism | other metabolic processes | transport	IMP	Publication:501721563|PMID:17513499	TAIR	2007-11-07
AT1G79280	2207390	AT1G79280	protein import into nucleus		GO:0006606	6920	proc	transport	IEA	AnalysisReference:501756966		04/23/2017 00:00:00
AT1G79280	2207390	AT1G79280	regulation of gene silencing		GO:0060968	33151	proc	other metabolic processes | other cellular processes	IMP	Publication:501771773|PMID:27672037	TAIR	04/19/2017 00:00:00
AT1G79280	2207390	AT1G79280	stamen development		GO:0048443	18880	proc	developmental processes	IMP	Publication:501721563|PMID:17513499	TAIR	2007-11-07
AT1G80530	2198938	AT1G80530	response to karrikin		GO:0080167	35962	proc	response to abiotic or biotic stimulus	IEP	Publication:501736304|PMID:20351290	TAIR	09/27/2010 00:00:00
AT2G16070	2052996	AT2G16070	plastid fission		GO:0043572	22501	proc	cell organization and biogenesis	IGI	Publication:501719872|PMID:16998069		07/13/2007 00:00:00
AT2G18960	2044450	AT2G18960	ATP biosynthetic process		GO:0006754	4694	proc	other cellular processes | other metabolic processes	IEA	AnalysisReference:501756966		09/23/2017 00:00:00
AT2G18960	2044450	AT2G18960	ATP hydrolysis coupled proton transport		GO:0015991	4696	proc	transport	IDA	Publication:4963|PMID:8300635		2016-01-08
AT2G18960	2044450	AT2G18960	proton transport		GO:0015992	6937	proc	transport	TAS	Publication:4963|PMID:8300635	TAIR	2006-10-05
AT2G18960	2044450	AT2G18960	regulation of stomatal movement		GO:0010119	13863	proc	other cellular processes	IMP	Publication:501681594|PMID:12047634	TAIR	2003-01-08
AT2G18960	2044450	AT2G18960	response to abscisic acid		GO:0009737	11395	proc	other biological processes	IMP	Publication:501681594|PMID:12047634	TAIR	2003-01-08
AT2G18960	2044450	AT2G18960	response to water deprivation		GO:0009414	5647	proc	response to abiotic or biotic stimulus | response to stress	IMP	Publication:501681594|PMID:12047634	TAIR	2003-01-08
AT2G18960	2044450	AT2G18960	stomatal opening		GO:1990069	45221	proc	other cellular processes	IMP	Publication:501770391|PMID:27261063	TAIR	2016-12-07
AT2G19490	2050439	AT2G19490	DNA recombinase assembly		GO:0000730	13292	proc	other cellular processes | response to stress | DNA or RNA metabolism | cell organization and biogenesis	IBA	Communication:501741973		2015-06-08
AT2G19490	2050439	AT2G19490	DNA recombination		GO:0006310	4740	proc	DNA or RNA metabolism	ISS	Communication:501714663	TIGR	2003-09-09
AT2G19490	2050439	AT2G19490	DNA repair		GO:0006281	4741	proc	response to stress | DNA or RNA metabolism | other cellular processes	ISS	Communication:501714663	TIGR	2003-09-09
AT2G19490	2050439	AT2G19490	mitotic recombination		GO:0006312	6401	proc	DNA or RNA metabolism	IBA	Communication:501741973		2015-06-08
AT2G19490	2050439	AT2G19490	response to ionizing radiation		GO:0010212	18520	proc	response to abiotic or biotic stimulus	IBA	Communication:501741973		2015-06-08
AT2G19490	2050439	AT2G19490	SOS response		GO:0009432	4917	proc	response to stress | other cellular processes	ISS	Communication:501714663	TIGR	2003-09-09
AT2G19490	2050439	AT2G19490	strand invasion		GO:0042148	10740	proc	DNA or RNA metabolism	IBA	Communication:501741973		2015-06-08
AT2G26460	2066221	AT2G26460	RNA splicing		GO:0008380	4903	proc	other metabolic processes | other cellular processes	IMP	Publication:501734870|PMID:19734266		2009-07-10
AT2G34357	1006230010	AT2G34357	unknown		GO:0008150	5239	proc	unknown biological processes	ND	Communication:1345790	TAIR	10/19/2006 00:00:00
AT2G40070	2061211	AT2G40070	unknown		GO:0008150	5239	proc	unknown biological processes	ND	Communication:1345790	TAIR	2009-08-05
AT3G01160	2102127	AT3G01160	unknown		GO:0008150	5239	proc	unknown biological processes	ND	Communication:1345790	TAIR	10/19/2006 00:00:00
AT3G01540	2084178	AT3G01540	nuclear-transcribed mRNA catabolic process, nonsense-mediated decay		GO:0000184	6508	proc	other cellular processes | other metabolic processes	IEA	AnalysisReference:501756968		09/23/2017 00:00:00
AT3G01540	2084178	AT3G01540	RNA secondary structure unwinding		GO:0010501	28853	proc	other metabolic processes | other cellular processes	IBA	Communication:501741973		03/24/2015 00:00:00
AT3G01540	2084178	AT3G01540	rRNA processing		GO:0006364	7076	proc	other metabolic processes | other cellular processes	IEA	AnalysisReference:501756968		09/23/2017 00:00:00
AT3G05420	2079777	AT3G05420	lipid transport		GO:0006869	6187	proc	transport	IDA	Publication:501718467|PMID:15604682	TAIR	2006-07-04
AT3G05420	2079777	AT3G05420	response to ethylene		GO:0009723	11403	proc	other biological processes	IEP	Publication:501729009|PMID:18836139		2016-01-08
AT3G05420	2079777	AT3G05420	response to jasmonic acid		GO:0009753	11419	proc	other biological processes	IEP	Publication:501729009|PMID:18836139		2016-01-08
AT3G05420	2079777	AT3G05420	response to light stimulus		GO:0009416	6176	proc	response to abiotic or biotic stimulus	TAS	Publication:501729630|PMID:19121948		2016-01-08
AT3G08670	2077883	AT3G08670	response to oxidative stress		GO:0006979	6625	proc	response to stress	IMP	Publication:501727372|PMID:18614705	TAIR	2008-12-09
AT3G10190	2076279	AT3G10190	defense response to fungus		GO:0050832	18013	proc	response to abiotic or biotic stimulus | response to stress	IMP	Publication:501760620|PMID:25036661	TAIR	11/21/2014 00:00:00
AT3G10650	2075785	AT3G10650	nucleus organization		GO:0006997	6521	proc	cell organization and biogenesis	IMP	Publication:501744911|PMID:21818409	TAIR	09/19/2011 00:00:00
AT3G10650	2075785	AT3G10650	poly(A)+ mRNA export from nucleus		GO:0016973	6794	proc	other metabolic processes | DNA or RNA metabolism | transport	IMP	Publication:501735015|PMID:19843313	TAIR	2011-02-05
AT3G12280	2082194	AT3G12280	asymmetric cell division		GO:0008356	5187	proc	other cellular processes	IMP	Publication:501750707|PMID:22921914		2016-01-08
AT3G12280	2082194	AT3G12280	cell cycle		GO:0007049	5323	proc	other cellular processes	IEA	AnalysisReference:501756966		09/23/2017 00:00:00
AT3G12280	2082194	AT3G12280	cell differentiation		GO:0030154	9398	proc	other cellular processes	IMP	Publication:501738242|PMID:20525851		2016-01-08
AT3G12280	2082194	AT3G12280	cell fate specification		GO:0001708	12024	proc	other cellular processes	IMP	Publication:501730239|PMID:19359496	TAIR	05/27/2009 00:00:00
AT3G12280	2082194	AT3G12280	double fertilization forming a zygote and endosperm		GO:0009567	11318	proc	other biological processes	IEP	Publication:501722574|PMID:17555967	TAIR	2007-01-11
AT3G12280	2082194	AT3G12280	embryo sac development		GO:0009553	11320	proc	developmental processes	IMP	Publication:501720566|PMID:17172356	TAIR	03/22/2007 00:00:00
AT3G12280	2082194	AT3G12280	endosperm development		GO:0009960	13684	proc	developmental processes	IMP	Publication:501712634|PMID:15201912	TAIR	02/27/2007 00:00:00
AT3G12280	2082194	AT3G12280	G1/S transition of mitotic cell cycle		GO:0000082	4786	proc	other cellular processes	TAS	Publication:2551|PMID:9620273	TAIR	10/24/2003 00:00:00
AT3G12280	2082194	AT3G12280	gametophyte development		GO:0048229	17129	proc	developmental processes	IMP	Publication:501729230|PMID:18976913		2016-01-08
AT3G12280	2082194	AT3G12280	generative cell differentiation		GO:0022619	25750	proc	developmental processes | other cellular processes	IMP	Publication:501729230|PMID:18976913	TAIR	2008-12-12
AT3G12280	2082194	AT3G12280	guard cell fate commitment		GO:0010377	26832	proc	developmental processes | other cellular processes	IGI	Publication:501761732|PMID:25303364		2016-01-08
AT3G12280	2082194	AT3G12280	leaf development		GO:0048366	18907	proc	developmental processes	IMP	Publication:501718207|PMID:16361519	TAIR	10/22/2007 00:00:00
AT3G12280	2082194	AT3G12280	palisade mesophyll development		GO:1903866	49088	proc	other biological processes	IMP	Publication:501756957|PMID:24118480		2016-01-08
AT3G12280	2082194	AT3G12280	pollen development		GO:0009555	11329	proc	developmental processes	IMP	Publication:501730239|PMID:19359496	TAIR	05/27/2009 00:00:00
AT3G12280	2082194	AT3G12280	regulation of cell cycle		GO:0051726	22516	proc	other cellular processes	IEA	AnalysisReference:501756966		09/23/2017 00:00:00
AT3G12280	2082194	AT3G12280	regulation of cell growth		GO:0001558	8870	proc	other cellular processes | cell organization and biogenesis	IMP	Publication:501718166|PMID:16377572	TAIR	2010-05-08
AT3G12280	2082194	AT3G12280	regulation of DNA endoreduplication		GO:0032875	26512	proc	DNA or RNA metabolism | other cellular processes | other metabolic processes	IMP	Publication:501718207|PMID:16361519	TAIR	10/22/2007 00:00:00
AT3G12280	2082194	AT3G12280	regulation of gene expression by genetic imprinting		GO:0006349	6042	proc	other cellular processes | other metabolic processes	IPI	Publication:501727509|PMID:18700816	TAIR	03/18/2011 00:00:00
AT3G12280	2082194	AT3G12280	regulation of genetic imprinting		GO:2000653	38158	proc	other cellular processes | other metabolic processes	IDA	Publication:501727509|PMID:18700816		2016-01-08
AT3G12280	2082194	AT3G12280	regulation of nuclear division		GO:0051783	22665	proc	cell organization and biogenesis | other cellular processes	IMP	Publication:501712634|PMID:15201912	TAIR	2010-05-08
AT3G12280	2082194	AT3G12280	regulation of stem cell population maintenance		GO:2000036	35584	proc	other biological processes	IMP	Publication:501738242|PMID:20525851		2016-01-08
AT3G12280	2082194	AT3G12280	regulation of transcription from RNA polymerase II promoter		GO:0006357	7463	proc	other metabolic processes | transcription,DNA-dependent | other cellular processes	IEA	AnalysisReference:501756966		09/23/2017 00:00:00
AT3G12280	2082194	AT3G12280	synapsis		GO:0007129	7366	proc	cell organization and biogenesis | other cellular processes	IMP	Publication:501741383|PMID:21217641		2016-01-08
AT3G12280	2082194	AT3G12280	transcription, DNA-templated		GO:0006351	7470	proc	transcription,DNA-dependent	IEA	AnalysisReference:501756966		09/23/2017 00:00:00
AT3G12280	2082194	AT3G12280	trichome morphogenesis		GO:0010090	14838	proc	cell organization and biogenesis | other cellular processes	IMP	Publication:501718207|PMID:16361519	TAIR	10/22/2007 00:00:00
AT3G12280	2082194	AT3G12280	viral process		GO:0016032	7568	proc	other biological processes	IEA	AnalysisReference:501756968		09/23/2017 00:00:00
AT3G13200	2089989	AT3G13200	mRNA splicing, via spliceosome		GO:0000398	17088	proc	other metabolic processes | other cellular processes	IEA	AnalysisReference:501756966		09/23/2017 00:00:00
AT3G13530	2092890	AT3G13530	activation of protein kinase activity		GO:0032147	24245	proc	other metabolic processes | other cellular processes | protein metabolism	IBA	Communication:501741973		2017-10-05
AT3G13530	2092890	AT3G13530	cell cycle		GO:0007049	5323	proc	other cellular processes	IEA	AnalysisReference:501756968		05/14/2017 00:00:00
AT3G13530	2092890	AT3G13530	cell division		GO:0051301	20664	proc	other cellular processes	IEA	AnalysisReference:501756968		05/14/2017 00:00:00
AT3G13530	2092890	AT3G13530	plasma membrane organization		GO:0007009	6772	proc	cell organization and biogenesis	IGI	Publication:501719955|PMID:16965555	TAIR	2006-02-11
AT3G13530	2092890	AT3G13530	pollen development		GO:0009555	11329	proc	developmental processes	IGI	Publication:501719955|PMID:16965555	TAIR	2006-02-11
AT3G13530	2092889	AT3G13530.1	protein phosphorylation		GO:0006468	6897	proc	other metabolic processes | protein metabolism | other cellular processes	RCA	Publication:501740359|PMID:21075962		05/27/2011 00:00:00
AT3G13530	2092890	AT3G13530	regulation of cell division		GO:0051302	20665	proc	other cellular processes	IDA	Publication:501713102|PMID:15292395		2016-01-08
AT3G13530	2092890	AT3G13530	regulation of embryonic development		GO:0045995	12744	proc	developmental processes	IMP	Publication:501751398|PMID:23087695		2016-01-08
AT3G13530	2092890	AT3G13530	regulation of extent of cell growth		GO:0061387	38546	proc	other cellular processes | cell organization and biogenesis	IMP	Publication:501751398|PMID:23087695		2016-01-08
AT3G13530	2092890	AT3G13530	regulation of mitotic cell cycle		GO:0007346	6394	proc	other cellular processes	IBA	Communication:501741973		2017-10-05
AT3G13530	2092890	AT3G13530	regulation of unidimensional cell growth		GO:0051510	21356	proc	cell organization and biogenesis | other cellular processes	IMP	Publication:501751398|PMID:23087695		2016-01-08
AT3G13530	2092890	AT3G13530	signal transduction by protein phosphorylation		GO:0023014	34603	proc	signal transduction | other cellular processes | protein metabolism | other metabolic processes	IBA	Communication:501741973		2017-10-05
AT3G13530	2092890	AT3G13530	stress-activated protein kinase signaling cascade		GO:0031098	19746	proc	other cellular processes | response to stress | signal transduction	IBA	Communication:501741973		2017-10-05
AT3G16310	2094937	AT3G16310	mRNA transport		GO:0051028	18790	proc	DNA or RNA metabolism | transport	IEA	AnalysisReference:501756968		09/23/2017 00:00:00
AT3G22190	2090409	AT3G22190	unknown		GO:0008150	5239	proc	unknown biological processes	ND	Communication:1345790	TAIR	10/19/2006 00:00:00
AT3G25070	2090250	AT3G25070	defense response signaling pathway, resistance gene-independent		GO:0010204	17796	proc	signal transduction | response to stress	IMP	Publication:501716309|PMID:15935761		2007-12-07
AT3G25070	2090250	AT3G25070	defense response to bacterium, incompatible interaction		GO:0009816	8840	proc	response to stress | response to abiotic or biotic stimulus	IMP	Publication:501678382|PMID:11607554	TAIR	2003-03-04
AT3G25070	2090250	AT3G25070	negative regulation of plant-type hypersensitive response		GO:0034051	28884	proc	other cellular processes | response to stress	IMP	Publication:501681891|PMID:11955429		2016-11-06
AT3G25070	2090250	AT3G25070	plant-type hypersensitive response		GO:0009626	6029	proc	other cellular processes | response to stress	IMP	Publication:501683405|PMID:12581527	TAIR	2006-11-05
AT3G25070	2090250	AT3G25070	protein phosphorylation		GO:0006468	6897	proc	other metabolic processes | other cellular processes | protein metabolism	IDA	Publication:501681891|PMID:11955429		2007-12-07
AT3G25070	2090250	AT3G25070	response to molecule of bacterial origin		GO:0002237	25068	proc	response to abiotic or biotic stimulus	IMP	Publication:501716309|PMID:15935761	TAIR	10/30/2006 00:00:00
AT3G52930	2085141	AT3G52930	gluconeogenesis		GO:0006094	5860	proc	other metabolic processes	ISS	Publication:501743408|PMID:21782461		02/16/2017 00:00:00
AT3G52930	2085141	AT3G52930	glycolytic process		GO:0006096	5918	proc	electron transport or energy pathways | other cellular processes | other metabolic processes	ISS	Publication:501743408|PMID:21782461		02/16/2017 00:00:00
AT3G52930	2085141	AT3G52930	pentose-phosphate shunt		GO:0006098	6649	proc	other cellular processes | other metabolic processes	TAS	Publication:501714757	TIGR	10/18/2002 00:00:00
AT3G52930	2085140	AT3G52930.1	response to cadmium ion		GO:0046686	13588	proc	other biological processes	IEP	Publication:501718481|PMID:16502469		05/25/2010 00:00:00
AT3G52930	2085141	AT3G52930	response to karrikin		GO:0080167	35962	proc	response to abiotic or biotic stimulus	IEP	Publication:501736304|PMID:20351290	TAIR	09/27/2010 00:00:00
AT3G52930	2085140	AT3G52930.1	response to salt stress		GO:0009651	7182	proc	response to abiotic or biotic stimulus | response to stress	IEP	Publication:501723430|PMID:17916636		2008-03-10
AT3G56720	2103595	AT3G56720	unknown		GO:0008150	5239	proc	unknown biological processes	ND	Communication:1345790	TAIR	10/19/2006 00:00:00
AT3G63400	2087383	AT3G63400	protein folding		GO:0006457	6884	proc	other cellular processes	ISS	Communication:501714663	TIGR	2003-09-10
AT3G63400	2087383	AT3G63400	protein peptidyl-prolyl isomerization		GO:0000413	25262	proc	other cellular processes | protein metabolism | other metabolic processes	IEA	AnalysisReference:501756966		09/23/2017 00:00:00
AT3G63400	2087383	AT3G63400	RNA splicing		GO:0008380	4903	proc	other cellular processes | other metabolic processes	NAS	Publication:501719314|PMID:16807317	TAIR	2006-05-10
AT4G13510	2140877	AT4G13510	ammonium transmembrane transport		GO:0072488	36839	proc	transport	IEA	AnalysisReference:501756966		09/23/2017 00:00:00
AT4G13510	2140877	AT4G13510	ammonium transport		GO:0015696	5112	proc	transport	IDA	Publication:501718979|PMID:16917981		05/16/2006 00:00:00
AT4G13510	2140877	AT4G13510	lateral root branching		GO:0080181	38876	proc	developmental processes	IMP	Publication:501741051|PMID:21119058	TAIR	06/13/2012 00:00:00
AT4G13510	2140877	AT4G13510	lateral root formation		GO:0010311	25479	proc	developmental processes	IMP	Publication:501741051|PMID:21119058		2011-07-02
AT4G13510	2140877	AT4G13510	organic cation transport		GO:0015695	6606	proc	transport	IBA	Communication:501741973		11/26/2015 00:00:00
AT4G13510	2140877	AT4G13510	protein polymerization		GO:0051258	19378	proc	cell organization and biogenesis	IDA	Publication:501724657|PMID:17293878	TAIR	2008-06-06
AT4G13510	2140877	AT4G13510	response to abscisic acid		GO:0009737	11395	proc	other biological processes	IDA	Publication:501739724|PMID:20733066	TAIR	10/30/2010 00:00:00
AT4G13510	2140877	AT4G13510	response to karrikin		GO:0080167	35962	proc	response to abiotic or biotic stimulus	IEP	Publication:501736304|PMID:20351290	TAIR	09/27/2010 00:00:00
AT4G13510	2140877	AT4G13510	transport		GO:0006810	7489	proc	transport	ISS	Communication:501714663	TIGR	09/24/2003 00:00:00
AT4G14200	2129480	AT4G14200	unknown		GO:0008150	5239	proc	unknown biological processes	ND	Communication:1345790	TAIR	10/19/2006 00:00:00
AT4G30190	2128941	AT4G30190	ATP biosynthetic process		GO:0006754	4694	proc	other metabolic processes | other cellular processes	IEA	AnalysisReference:501756966		09/23/2017 00:00:00
AT4G30190	2128941	AT4G30190	ATP hydrolysis coupled proton transport		GO:0015991	4696	proc	transport	IDA	Publication:4963|PMID:8300635		2016-01-08
AT4G31320	2128136	AT4G31320	response to auxin		GO:0009733	11397	proc	other biological processes	IEA	AnalysisReference:501756966		09/23/2017 00:00:00
AT4G32140	2116657	AT4G32140	unknown		GO:0008150	5239	proc	unknown biological processes	ND	Communication:1345790	TAIR	10/19/2006 00:00:00
AT4G34860	2116870	AT4G34860	carbohydrate metabolic process		GO:0005975	5291	proc	other metabolic processes	IEA	AnalysisReference:501756968		02/16/2017 00:00:00
AT4G37870	2137594	AT4G37870	cellular response to phosphate starvation		GO:0016036	6720	proc	response to stress | other cellular processes	IEP	Publication:501731941|PMID:17376028	TAIR	2010-07-06
AT4G37870	2137594	AT4G37870	defense response to fungus, incompatible interaction		GO:0009817	8841	proc	response to abiotic or biotic stimulus | response to stress	IDA	Publication:501734968|PMID:19857612	TAIR	03/24/2010 00:00:00
AT4G37870	2137594	AT4G37870	gluconeogenesis		GO:0006094	5860	proc	other metabolic processes	ISS	Communication:501714663	TIGR	2003-04-09
AT4G37870	2137593	AT4G37870.1	response to cadmium ion		GO:0046686	13588	proc	other biological processes	IEP	Publication:501718481|PMID:16502469		05/25/2010 00:00:00
AT5G02850	2151266	AT5G02850	regulation of transcription from RNA polymerase II promoter		GO:0006357	7463	proc	other cellular processes | transcription,DNA-dependent | other metabolic processes	IBA	Communication:501741973		2015-06-08
AT5G02850	2151266	AT5G02850	transcription, DNA-templated		GO:0006351	7470	proc	transcription,DNA-dependent	IEA	AnalysisReference:501756968		09/23/2017 00:00:00
AT5G03040	2143503	AT5G03040	unknown		GO:0008150	5239	proc	unknown biological processes	ND	Communication:1345790	TAIR	10/19/2006 00:00:00
AT5G13010	2182340	AT5G13010	defense response to fungus, incompatible interaction		GO:0009817	8841	proc	response to stress | response to abiotic or biotic stimulus	IMP	Publication:501763779|PMID:25902521	TAIR	05/20/2015 00:00:00
AT5G13010	2182340	AT5G13010	embryo development ending in seed dormancy		GO:0009793	11994	proc	developmental processes	NAS	Communication:501718471	TAIR	02/22/2006 00:00:00
AT5G13010	2182340	AT5G13010	mRNA splicing, via spliceosome		GO:0000398	17088	proc	other metabolic processes | other cellular processes	IBA	Communication:501741973		2017-10-05
AT5G13010	2182340	AT5G13010	positive regulation of protein complex assembly		GO:0031334	20894	proc	other cellular processes | cell organization and biogenesis	IGI	Publication:501763779|PMID:25902521	TAIR	05/20/2015 00:00:00
AT5G13010	2182340	AT5G13010	primary miRNA processing		GO:0031053	19487	proc	other metabolic processes | other cellular processes | protein metabolism	IMP	Publication:501763779|PMID:25902521	TAIR	05/20/2015 00:00:00
AT5G13010	2182340	AT5G13010	RNA splicing		GO:0008380	4903	proc	other metabolic processes | other cellular processes	IMP	Publication:501762078|PMID:25384462		2015-07-01
AT5G13010	2182340	AT5G13010	root hair elongation		GO:0048767	22772	proc	other cellular processes | developmental processes	IGI	Publication:501762078|PMID:25384462		2015-07-01
AT5G13010	2182340	AT5G13010	xylem and phloem pattern formation		GO:0010051	14829	proc	developmental processes	IMP	Publication:501762078|PMID:25384462		2015-07-01
AT5G15810	2143266	AT5G15810	tRNA processing		GO:0008033	7397	proc	other cellular processes | other metabolic processes	ISS	Communication:501714663	TIGR	2003-08-09
AT5G18590	2183008	AT5G18590	unknown		GO:0008150	5239	proc	unknown biological processes	ND	Communication:501683652	TIGR	2003-06-09
AT5G21160	2179013	AT5G21160	cellular heat acclimation		GO:0070370	31462	proc	other cellular processes | response to abiotic or biotic stimulus | response to stress	IEP	Publication:501757918|PMID:24332370	TAIR	2014-01-12
AT5G21160	2179013	AT5G21160	heat acclimation		GO:0010286	25138	proc	response to stress | response to abiotic or biotic stimulus	IMP	Publication:501757918|PMID:24332370		2016-01-08
AT5G21160	2179013	AT5G21160	mRNA catabolic process		GO:0006402	6223	proc	other metabolic processes | other cellular processes	IMP	Publication:501757918|PMID:24332370		2016-01-08
AT5G21160	2179013	AT5G21160	positive regulation of mRNA catabolic process		GO:0061014	34300	proc	other cellular processes | other metabolic processes	IGI	Publication:501757918|PMID:24332370	TAIR	2014-01-12
AT5G40200	2173727	AT5G40200	proteolysis		GO:0006508	6934	proc	protein metabolism	ISS	Communication:501714663	TIGR	08/26/2003 00:00:00
AT5G51300	2176222	AT5G51300	abscisic acid-activated signaling pathway		GO:0009738	11414	proc	signal transduction | other cellular processes	IEA	AnalysisReference:501756968		08/31/2017 00:00:00
AT5G51300	2176222	AT5G51300	mRNA processing		GO:0006397	6230	proc	other cellular processes | other metabolic processes	IEA	AnalysisReference:501756968		09/27/2017 00:00:00
AT5G51300	2176222	AT5G51300	response to abscisic acid		GO:0009737	11395	proc	other biological processes	IMP	Publication:501759582|PMID:24580679		2017-05-07
AT5G51300	2176222	AT5G51300	RNA splicing		GO:0008380	4903	proc	other metabolic processes | other cellular processes	IMP	Publication:501759582|PMID:24580679		2017-05-07
AT5G63950	2160811	AT5G63950	DNA recombination		GO:0006310	4740	proc	DNA or RNA metabolism	IEA	AnalysisReference:501756968		09/23/2017 00:00:00
AT5G63950	2160811	AT5G63950	positive regulation of mitotic recombination		GO:0045951	12676	proc	DNA or RNA metabolism | other cellular processes | other metabolic processes	IDA	Publication:501745545|PMID:21968679		2016-01-08
AT5G63950	2160810	AT5G63950.1	response to cadmium ion		GO:0046686	13588	proc	other biological processes	IEP	Publication:501718481|PMID:16502469		05/25/2010 00:00:00
AT5G67220	2155528	AT5G67220	oxidation-reduction process		GO:0055114	29342	proc	other metabolic processes	IEA	AnalysisReference:501756966		09/23/2017 00:00:00
AT5G67220	2155528	AT5G67220	regulation of nitrogen utilization		GO:0006808	6496	proc	other biological processes	ISS	Communication:501714663	TIGR	09/16/2003 00:00:00
