# Supplementary material for: The Arabidopsis Root Tip (Phospho)Proteomes at Growth-Promoting versus Growth-Repressing Conditions Reveal Novel Root Growth Regulators
Source: Cells. 2021 Jul 2;10(7):1665. doi: 10.3390/cells10071665 (PMC8303113; doi:10.3390/cells10071665)
Supplement: Supplementary file 1 [file cells-10-01665-s001.zip › Nikonorova_Table S7.xlsx]

## Sheet: Table S7
Table S7. GO categorization for phosphoproteome data (potential growth repression)
Locus	Gene Model(s)	GO term (GO ID)	cat		code	GO Slim	Reference	Made by: date last modified
AT1G08680	2025575	AT1G08680	protein autophosphorylation	protein autophosphorylation	GO:0046777	13750	proc	other metabolic processes | protein metabolism | other cellular processes	IDA	Publication:501742526|PMID:21477822	TAIR	2011-04-05
AT1G08680	2025575	AT1G08680	protein autophosphorylation		GO:0046777	13750	proc	other metabolic processes | protein metabolism | other cellular processes	IDA	Publication:501742526|PMID:21477822	TAIR	2011-04-05
AT1G09730	2024281	AT1G09730	positive regulation of day photoperiodism, flowering	positive regulation of day photoperiodism, floweringprotein desumoylationproteolysisresponse to stressprotein sumoylation	GO:0048578	21447	proc	developmental processes | response to abiotic or biotic stimulus	IMP	Publication:501773589|PMID:27925396	TAIR	03/13/2017 00:00:00
AT1G09730	2024281	AT1G09730	protein desumoylation		GO:0016926	6879	proc	protein metabolism | other cellular processes | other metabolic processes	ISS	Publication:501719700|PMID:16920872		2016-01-08
AT1G09730	2024281	AT1G09730	proteolysis		GO:0006508	6934	proc	protein metabolism	ISS	Communication:501714663	TIGR	2003-09-09
AT1G09730	2024281	AT1G09730	response to stress		GO:0006950	7330	proc	response to stress	IEA	AnalysisReference:501756966		2017-12-04
AT1G09730	2024281	AT1G09730	proteolysis		GO:0006508	6934	proc	protein metabolism	IEA	AnalysisReference:501756966		2017-12-04
AT1G09730	2024281	AT1G09730	proteolysis		GO:0006508	6934	proc	protein metabolism	IDA	Publication:501773589|PMID:27925396		2017-02-04
AT1G09730	2024281	AT1G09730	positive regulation of short-day photoperiodism, flowering		GO:0048576	21450	proc	response to abiotic or biotic stimulus | developmental processes	IMP	Publication:501773589|PMID:27925396	TAIR	03/13/2017 00:00:00
AT1G09730	2024281	AT1G09730	protein sumoylation		GO:0016925	6904	proc	other metabolic processes | protein metabolism | other cellular processes	IMP	Publication:501773589|PMID:27925396	TAIR	03/13/2017 00:00:00
AT1G18150	2194040	AT1G18150	response to reactive oxygen species	response to reactive oxygen speciesresponse to jasmonic acidresponse to hydrogen peroxideresponse to woundingregulation of gene expressionsignal transduction	GO:0000302	10197	proc	response to stress	IMP	Publication:501742109|PMID:21419340	TAIR	2011-06-06
AT1G18150	2194040	AT1G18150	response to jasmonic acid		GO:0009753	11419	proc	other biological processes	IEP	Publication:501742109|PMID:21419340	TAIR	2011-06-06
AT1G18150	2194040	AT1G18150	response to hydrogen peroxide		GO:0042542	13166	proc	response to stress	IEP	Publication:501742109|PMID:21419340	TAIR	2011-06-06
AT1G18150	2194040	AT1G18150	response to wounding		GO:0009611	7144	proc	response to stress	IEP	Publication:501742109|PMID:21419340	TAIR	2011-06-06
AT1G18150	2194040	AT1G18150	regulation of gene expression		GO:0010468	28541	proc	other metabolic processes	IBA	Communication:501741973		01/19/2017 00:00:00
AT1G18150	2194040	AT1G18150	signal transduction		GO:0007165	7243	proc	signal transduction	IC	Publication:501683496|PMID:12119167	TIGR	2003-12-05
AT1G18210	2194105	AT1G18210	biological_process_unknown	unknown	GO:0008150	5239	proc	unknown biological processes	ND	Communication:1345790	TAIR	10/19/2006 00:00:00
AT1G18420	2014119	AT1G18420	malate transport	malate transport	GO:0015743	6249	proc	transport	IEA	AnalysisReference:501756966		2017-12-04
AT1G20840	2030377	AT1G20840	response to nematode	response to nematodeglucose importhexose transmembrane transport	GO:0009624	7133	proc	response to abiotic or biotic stimulus	IEP	Publication:501718529|PMID:16478044	TAIR	03/16/2006 00:00:00
AT1G20840	2030377	AT1G20840	glucose import		GO:0046323	13158	proc	transport	IBA	Communication:501741973		01/13/2016 00:00:00
AT1G20840	2030377	AT1G20840	hexose transmembrane transport		GO:0035428	35089	proc	transport	IBA	Communication:501741973		01/13/2016 00:00:00
AT1G32790	2035629	AT1G32790	biological_process_unknown	unknown	GO:0008150	5239	proc	unknown biological processes	ND	Communication:1345790	TAIR	10/19/2006 00:00:00
AT1G53500	2024902	AT1G53500	seed coat development	seed coat developmentUDP-rhamnose biosynthetic processoxidation-reduction processmucilage biosynthetic process	GO:0010214	18521	proc	developmental processes	IMP	Publication:501711654|PMID:14671019	TAIR	10/25/2004 00:00:00
AT1G53500	2024902	AT1G53500	UDP-rhamnose biosynthetic process		GO:0010253	21553	proc	other metabolic processes | other cellular processes	IDA	Publication:501720512|PMID:17190829	TAIR	11/21/2007 00:00:00
AT1G53500	2024902	AT1G53500	oxidation-reduction process		GO:0055114	29342	proc	other metabolic processes	IEA	AnalysisReference:501756968		09/23/2017 00:00:00
AT1G53500	2024902	AT1G53500	mucilage biosynthetic process		GO:0010192	17778	proc	other cellular processes | other metabolic processes	IMP	Publication:1546021|PMID:11706181	TAIR	07/18/2003 00:00:00
AT1G59900	2025966	AT1G59900	response to cadmium ion	response to cadmium ionoxidation-reduction processacetyl-CoA biosynthetic process from pyruvateglycolytic process	GO:0046686	13588	proc	other biological processes	IEP	Publication:501735733|PMID:20005002	TAIR	05/25/2010 00:00:00
AT1G59900	2025965	AT1G59900.1	response to cadmium ion		GO:0046686	13588	proc	other biological processes	IEP	Publication:501718481|PMID:16502469		05/25/2010 00:00:00
AT1G59900	2025966	AT1G59900	oxidation-reduction process		GO:0055114	29342	proc	other metabolic processes	IEA	AnalysisReference:501756970		2017-10-05
AT1G59900	2025966	AT1G59900	oxidation-reduction process		GO:0055114	29342	proc	other metabolic processes	IEA	AnalysisReference:501756968		09/23/2017 00:00:00
AT1G59900	2025966	AT1G59900	acetyl-CoA biosynthetic process from pyruvate		GO:0006086	7061	proc	other metabolic processes | other cellular processes	IEA	AnalysisReference:501756966		09/23/2017 00:00:00
AT1G59900	2025966	AT1G59900	glycolytic process		GO:0006096	5918	proc	other cellular processes | electron transport or energy pathways | other metabolic processes	IEA	AnalysisReference:501756968		09/23/2017 00:00:00
AT1G64650	2019429	AT1G64650	molybdate ion transport	molybdate ion transport	GO:0015689	6415	proc	transport	IEA	AnalysisReference:501756966		09/23/2017 00:00:00
AT1G72160	2207016	AT1G72160	cell division	cell divisiontransportcell cycle	GO:0051301	20664	proc	other cellular processes	IEA	AnalysisReference:501756968		09/23/2017 00:00:00
AT1G72160	2207016	AT1G72160	transport		GO:0006810	7489	proc	transport	ISS	Communication:501714663	TIGR	09/15/2003 00:00:00
AT1G72160	2207016	AT1G72160	transport		GO:0006810	7489	proc	transport	IEA	AnalysisReference:501756968		09/23/2017 00:00:00
AT1G72160	2207016	AT1G72160	cell cycle		GO:0007049	5323	proc	other cellular processes	IEA	AnalysisReference:501756968		09/23/2017 00:00:00
AT1G73630	2027869	AT1G73630	biological_process_unknown	unknown	GO:0008150	5239	proc	unknown biological processes	ND	Communication:1345790	TAIR	10/19/2006 00:00:00
AT1G75220	2025132	AT1G75220	glucose import	glucose importglucose homeostasishexose transmembrane transportpositive regulation of seed germination	GO:0046323	13158	proc	transport	IBA	Communication:501741973		01/13/2016 00:00:00
AT1G75220	2025132	AT1G75220	glucose homeostasis		GO:0042593	14167	proc	other biological processes	IMP	Publication:501745490|PMID:21984725	TAIR	08/15/2012 00:00:00
AT1G75220	2025132	AT1G75220	hexose transmembrane transport		GO:0035428	35089	proc	transport	IBA	Communication:501741973		01/13/2016 00:00:00
AT1G75220	2025132	AT1G75220	positive regulation of seed germination		GO:0010030	13934	proc	developmental processes	IMP	Publication:501745490|PMID:21984725	TAIR	08/15/2012 00:00:00
AT1G77760	2203221	AT1G77760	oxidation-reduction process	oxidation-reduction processnitric oxide biosynthetic processnitrate assimilationresponse to herbicideresponse to light stimulus	GO:0055114	29342	proc	other metabolic processes	IEA	AnalysisReference:501756968		09/23/2017 00:00:00
AT1G77760	2203221	AT1G77760	nitric oxide biosynthetic process		GO:0006809	6491	proc	other metabolic processes | other cellular processes	IMP	Publication:501682465|PMID:12446847	TAIR	01/24/2006 00:00:00
AT1G77760	2203221	AT1G77760	nitrate assimilation		GO:0042128	10737	proc	other cellular processes | other metabolic processes	IMP	Publication:5194|PMID:8510658	TAIR	03/28/2003 00:00:00
AT1G77760	2203221	AT1G77760	response to herbicide		GO:0009635	7126	proc	response to stress	IEA	AnalysisReference:501756968		09/23/2017 00:00:00
AT1G77760	2203221	AT1G77760	response to light stimulus		GO:0009416	6176	proc	response to abiotic or biotic stimulus	IMP	Publication:501716328|PMID:15908593	TAIR	2005-03-10
AT2G20000	2061649	AT2G20000	regulation of mitotic cell cycle	regulation of mitotic cell cycleregulation of unidimensional cell growthcell divisionroot cap developmentprotein ubiquitinationregulation of cell divisionroot meristem specificationresponse to auxingamete generationroot developmentregulation of mitotic cell cyclecell differentiationcell cycle	GO:0007346	6394	proc	other cellular processes	IMP	Publication:501719644|PMID:16938844	TAIR	09/20/2006 00:00:00
AT2G20000	2061649	AT2G20000	regulation of unidimensional cell growth		GO:0051510	21356	proc	cell organization and biogenesis | other cellular processes	IGI	Publication:501723336|PMID:17944809	TAIR	05/15/2008 00:00:00
AT2G20000	2061649	AT2G20000	cell division		GO:0051301	20664	proc	other cellular processes	IEA	AnalysisReference:501756968		09/23/2017 00:00:00
AT2G20000	2061649	AT2G20000	cell division		GO:0051301	20664	proc	other cellular processes	IDA	Publication:501723336|PMID:17944809	TAIR	05/15/2008 00:00:00
AT2G20000	2061649	AT2G20000	root cap development		GO:0048829	23444	proc	developmental processes	IMP	Publication:2901|PMID:9425146	TAIR	09/20/2006 00:00:00
AT2G20000	2061649	AT2G20000	protein ubiquitination		GO:0016567	6911	proc	other cellular processes | protein metabolism | other metabolic processes	IEA	AnalysisReference:501757242		09/23/2017 00:00:00
AT2G20000	2061649	AT2G20000	regulation of cell division		GO:0051302	20665	proc	other cellular processes	IGI	Publication:501723336|PMID:17944809	TAIR	05/15/2008 00:00:00
AT2G20000	2061649	AT2G20000	root meristem specification		GO:0010071	14813	proc	developmental processes	IMP	Publication:2901|PMID:9425146	TAIR	09/20/2006 00:00:00
AT2G20000	2061649	AT2G20000	response to auxin		GO:0009733	11397	proc	other biological processes	IMP	Publication:501682689|PMID:12368267	TAIR	09/20/2006 00:00:00
AT2G20000	2061649	AT2G20000	gamete generation		GO:0007276	5824	proc	other biological processes	IGI	Publication:501723336|PMID:17944809	TAIR	05/15/2008 00:00:00
AT2G20000	2061649	AT2G20000	root development		GO:0048364	18902	proc	developmental processes	IMP	Publication:2901|PMID:9425146	TAIR	02/28/2005 00:00:00
AT2G20000	2061649	AT2G20000	regulation of mitotic cell cycle		GO:0007346	6394	proc	other cellular processes	TAS	Publication:501682689|PMID:12368267	TAIR	03/28/2003 00:00:00
AT2G20000	2061649	AT2G20000	cell differentiation		GO:0030154	9398	proc	other cellular processes	IMP	Publication:501682689|PMID:12368267	TAIR	03/28/2003 00:00:00
AT2G20000	2061649	AT2G20000	cell cycle		GO:0007049	5323	proc	other cellular processes	IEA	AnalysisReference:501756968		2017-12-04
AT2G22300	2060405	AT2G22300	defense response to fungus	defense response to fungusregulation of transcription, DNA-templatedresponse to colddefense response to bacteriumpositive regulation of transcription from RNA polymerase II promoterleaf senescencecellular response to cold	GO:0050832	18013	proc	response to abiotic or biotic stimulus | response to stress	IGI	Publication:501747447|PMID:22345509	TAIR	04/30/2012 00:00:00
AT2G22300	2060405	AT2G22300	regulation of transcription, DNA-templated		GO:0006355	7461	proc	other metabolic processes | transcription,DNA-dependent | other cellular processes	TAS	Publication:501682352|PMID:12218065		2011-03-06
AT2G22300	2060405	AT2G22300	response to cold		GO:0009409	5433	proc	response to stress | response to abiotic or biotic stimulus	IMP	Publication:501754420|PMID:23581962		05/31/2013 00:00:00
AT2G22300	2060405	AT2G22300	defense response to bacterium		GO:0042742	14972	proc	response to stress | response to abiotic or biotic stimulus	IMP	Publication:501724056|PMID:18298954	TAIR	2013-01-02
AT2G22300	2060405	AT2G22300	defense response to bacterium		GO:0042742	14972	proc	response to stress | response to abiotic or biotic stimulus	IGI	Publication:501747447|PMID:22345509	TAIR	04/30/2012 00:00:00
AT2G22300	2060405	AT2G22300	positive regulation of transcription from RNA polymerase II promoter		GO:0045944	12514	proc	other metabolic processes | transcription,DNA-dependent | other cellular processes	IBA	Communication:501741973		08/13/2015 00:00:00
AT2G22300	2060405	AT2G22300	leaf senescence		GO:0010150	17252	proc	developmental processes	IMP	Publication:501747447|PMID:22345509	TAIR	04/30/2012 00:00:00
AT2G22300	2060405	AT2G22300	cellular response to cold		GO:0070417	31524	proc	response to abiotic or biotic stimulus | response to stress | other cellular processes	IGI	Publication:501774911|PMID:28351986	TAIR	05/19/2017 00:00:00
AT2G29620	2060615	AT2G29620	biological_process_unknown	unknown	GO:0008150	5239	proc	unknown biological processes	ND	Communication:1345790	TAIR	10/19/2006 00:00:00
AT2G30620	2064332	AT2G30620	nucleosome assembly	nucleosome assembly	GO:0006334	6555	proc	cell organization and biogenesis	ISS	Communication:501714663	TIGR	2003-01-10
AT2G30620	2064332	AT2G30620	nucleosome assembly		GO:0006334	6555	proc	cell organization and biogenesis	IEA	AnalysisReference:501756966		09/23/2017 00:00:00
AT2G30930	2052776	AT2G30930	biological_process_unknown	unknown	GO:0008150	5239	proc	unknown biological processes	ND	Communication:1345790	TAIR	10/19/2006 00:00:00
AT2G32730	2046402	AT2G32730	regulation of protein catabolic process	regulation of protein catabolic processubiquitin-dependent protein catabolic process	GO:0042176	11245	proc	other metabolic processes | protein metabolism	IEA	AnalysisReference:501756966		09/23/2017 00:00:00
AT2G32730	2046402	AT2G32730	ubiquitin-dependent protein catabolic process		GO:0006511	7522	proc	other cellular processes | other metabolic processes | protein metabolism	TAS	Publication:1445|PMID:10363660	TIGR	04/17/2003 00:00:00
AT2G35210	2063429	AT2G35210	pollen development	pollen developmentembryo development ending in seed dormancy	GO:0009555	11329	proc	developmental processes	IMP	Publication:501729801|PMID:19237690	TAIR	03/25/2009 00:00:00
AT2G35210	2063429	AT2G35210	embryo development ending in seed dormancy		GO:0009793	11994	proc	developmental processes	IMP	Publication:501714637|PMID:15634699	TAIR	2007-07-03
AT2G37550	2040691	AT2G37550	vesicle-mediated transport	vesicle-mediated transport	GO:0016192	7567	proc	transport	IEA	AnalysisReference:501756968		09/23/2017 00:00:00
AT2G46860	2041424	AT2G46860	phosphate-containing compound metabolic process	phosphate-containing compound metabolic process	GO:0006796	6719	proc	other cellular processes | other metabolic processes	IEA	AnalysisReference:501756966		09/27/2017 00:00:00
AT3G01310	2102057	AT3G01310	inositol metabolic process	inositol metabolic processdefense response to fungus, incompatible interactionjasmonic acid and ethylene-dependent systemic resistance	GO:0006020	6453	proc	other cellular processes | other metabolic processes	IBA	Communication:501741973		06/17/2016 00:00:00
AT3G01310	2102057	AT3G01310	defense response to fungus, incompatible interaction		GO:0009817	8841	proc	response to abiotic or biotic stimulus | response to stress	IMP	Publication:501763787|PMID:25901085		2015-04-06
AT3G01310	2102057	AT3G01310	inositol phosphate biosynthetic process		GO:0032958	26624	proc	other cellular processes | other metabolic processes	IMP	Publication:501761352|PMID:25231822	TAIR	11/19/2014 00:00:00
AT3G01310	2102057	AT3G01310	jasmonic acid and ethylene-dependent systemic resistance		GO:0009861	8836	proc	response to stress | response to abiotic or biotic stimulus	IMP	Publication:501763787|PMID:25901085		2015-04-06
AT3G03050	2097700	AT3G03050	cell wall organization	cell wall organizationcellulose biosynthetic processplant-type cell wall biogenesisplant-type cell wall organization or biogenesispolysaccharide biosynthetic processresponse to coldresponse to cyclopentenone	GO:0071555	34184	proc	other cellular processes | cell organization and biogenesis	IEA	AnalysisReference:501756968		01/24/2017 00:00:00
AT3G03050	2097700	AT3G03050	cell wall organization		GO:0071555	34184	proc	other cellular processes | cell organization and biogenesis	IEA	AnalysisReference:501756968		01/24/2017 00:00:00
AT3G03050	2097700	AT3G03050	cell wall organization		GO:0071555	34184	proc	other cellular processes | cell organization and biogenesis	IEA	AnalysisReference:501756968		01/24/2017 00:00:00
AT3G03050	2097700	AT3G03050	cell wall organization		GO:0071555	34184	proc	other cellular processes | cell organization and biogenesis	IEA	AnalysisReference:501756968		01/24/2017 00:00:00
AT3G03050	2097700	AT3G03050	cellulose biosynthetic process		GO:0030244	8923	proc	other cellular processes | other metabolic processes	IEA	AnalysisReference:501756966		01/24/2017 00:00:00
AT3G03050	2097700	AT3G03050	cellulose biosynthetic process		GO:0030244	8923	proc	other cellular processes | other metabolic processes	IEA	AnalysisReference:501756966		01/24/2017 00:00:00
AT3G03050	2097700	AT3G03050	cellulose biosynthetic process		GO:0030244	8923	proc	other cellular processes | other metabolic processes	IEA	AnalysisReference:501756966		01/24/2017 00:00:00
AT3G03050	2097700	AT3G03050	cellulose biosynthetic process		GO:0030244	8923	proc	other cellular processes | other metabolic processes	IEA	AnalysisReference:501756966		01/24/2017 00:00:00
AT3G03050	2097700	AT3G03050	plant-type cell wall biogenesis		GO:0009832	10265	proc	other cellular processes	ISS	Communication:501714663	TIGR	2002-12-09
AT3G03050	2097700	AT3G03050	plant-type cell wall biogenesis		GO:0009832	10265	proc	other cellular processes	ISS	Communication:501714663	TIGR	2002-12-09
AT3G03050	2097700	AT3G03050	plant-type cell wall biogenesis		GO:0009832	10265	proc	other cellular processes	ISS	Communication:501714663	TIGR	2002-12-09
AT3G03050	2097700	AT3G03050	plant-type cell wall biogenesis		GO:0009832	10265	proc	other cellular processes	ISS	Communication:501714663	TIGR	2002-12-09
AT3G03050	2097700	AT3G03050	plant-type cell wall organization or biogenesis		GO:0071669	34585	proc	other cellular processes	IBA	Communication:501741973		01/20/2017 00:00:00
AT3G03050	2097700	AT3G03050	plant-type cell wall organization or biogenesis		GO:0071669	34585	proc	other cellular processes	IBA	Communication:501741973		01/20/2017 00:00:00
AT3G03050	2097700	AT3G03050	plant-type cell wall organization or biogenesis		GO:0071669	34585	proc	other cellular processes	IBA	Communication:501741973		01/20/2017 00:00:00
AT3G03050	2097700	AT3G03050	plant-type cell wall organization or biogenesis		GO:0071669	34585	proc	other cellular processes	IBA	Communication:501741973		01/20/2017 00:00:00
AT3G03050	2097700	AT3G03050	polysaccharide biosynthetic process		GO:0000271	6809	proc	other metabolic processes	ISS	Communication:501714663	TIGR	2002-12-09
AT3G03050	2097700	AT3G03050	polysaccharide biosynthetic process		GO:0000271	6809	proc	other metabolic processes	ISS	Communication:501714663	TIGR	2002-12-09
AT3G03050	2097700	AT3G03050	polysaccharide biosynthetic process		GO:0000271	6809	proc	other metabolic processes	ISS	Communication:501714663	TIGR	2002-12-09
AT3G03050	2097700	AT3G03050	polysaccharide biosynthetic process		GO:0000271	6809	proc	other metabolic processes	ISS	Communication:501714663	TIGR	2002-12-09
AT3G03050	2097700	AT3G03050	response to cold		GO:0009409	5433	proc	response to abiotic or biotic stimulus | response to stress	IEP	Publication:501728637|PMID:18768911		09/22/2008 00:00:00
AT3G03050	2097700	AT3G03050	response to cold		GO:0009409	5433	proc	response to abiotic or biotic stimulus | response to stress	IEP	Publication:501728637|PMID:18768911		09/22/2008 00:00:00
AT3G03050	2097700	AT3G03050	response to cold		GO:0009409	5433	proc	response to abiotic or biotic stimulus | response to stress	IEP	Publication:501728637|PMID:18768911		09/22/2008 00:00:00
AT3G03050	2097700	AT3G03050	response to cold		GO:0009409	5433	proc	response to abiotic or biotic stimulus | response to stress	IEP	Publication:501728637|PMID:18768911		09/22/2008 00:00:00
AT3G03050	2097700	AT3G03050	response to cyclopentenone		GO:0010583	29500	proc	other biological processes	IEP	Publication:501724352|PMID:18334669	TAIR	08/22/2008 00:00:00
AT3G03050	2097700	AT3G03050	response to cyclopentenone		GO:0010583	29500	proc	other biological processes	IEP	Publication:501724352|PMID:18334669	TAIR	08/22/2008 00:00:00
AT3G03050	2097700	AT3G03050	response to cyclopentenone		GO:0010583	29500	proc	other biological processes	IEP	Publication:501724352|PMID:18334669	TAIR	08/22/2008 00:00:00
AT3G03050	2097700	AT3G03050	response to cyclopentenone		GO:0010583	29500	proc	other biological processes	IEP	Publication:501724352|PMID:18334669	TAIR	08/22/2008 00:00:00
AT3G03320	2099699	AT3G03320	biological_process_unknown	unknown	GO:0008150	5239	proc	unknown biological processes	ND	Communication:1345790	TAIR	10/19/2006 00:00:00
AT3G04630	2084878	AT3G04630	root morphogenesis	root morphogenesiscircumnutation	GO:0010015	13857	proc	developmental processes	IMP	Publication:501683375|PMID:12586874	TAIR	08/25/2003 00:00:00
AT3G04630	2084878	AT3G04630	circumnutation		GO:0010031	13932	proc	other biological processes	IMP	Publication:501683375|PMID:12586874	TAIR	08/25/2003 00:00:00
AT3G05420	2079777	AT3G05420	response to jasmonic acid	response to jasmonic acidresponse to light stimulusresponse to ethylenelipid transport	GO:0009753	11419	proc	other biological processes	IEP	Publication:501729009|PMID:18836139		2016-01-08
AT3G05420	2079777	AT3G05420	response to light stimulus		GO:0009416	6176	proc	response to abiotic or biotic stimulus	TAS	Publication:501729630|PMID:19121948		2016-01-08
AT3G05420	2079777	AT3G05420	response to ethylene		GO:0009723	11403	proc	other biological processes	IEP	Publication:501729009|PMID:18836139		2016-01-08
AT3G05420	2079777	AT3G05420	lipid transport		GO:0006869	6187	proc	transport	IDA	Publication:501718467|PMID:15604682	TAIR	2006-07-04
AT3G09500	2074974	AT3G09500	ribosome biogenesis	translationribosome biogenesis	GO:0042254	11200	proc	other biological processes	ISS	Communication:501714663	TIGR	09/30/2003 00:00:00
AT3G09500	2074974	AT3G09500	translation		GO:0006412	6869	proc	protein metabolism | other metabolic processes | other cellular processes	ISS	Communication:501714663	TIGR	09/30/2003 00:00:00
AT3G13235	3700495	AT3G13235.1	response to cadmium ion	proteolysisresponse to cadmium ion	GO:0046686	13588	proc	other biological processes	IEP	Publication:501718481|PMID:16502469		05/25/2010 00:00:00
AT3G13235	505006342	AT3G13235	proteolysis		GO:0006508	6934	proc	protein metabolism	IEA	AnalysisReference:501756966		09/23/2017 00:00:00
AT3G14790	2099372	AT3G14790	UDP-rhamnose biosynthetic process	oxidation-reduction processUDP-rhamnose biosynthetic processnucleotide-sugar metabolic process	GO:0010253	21553	proc	other metabolic processes | other cellular processes	IDA	Publication:501720512|PMID:17190829	TAIR	11/21/2007 00:00:00
AT3G14790	2099372	AT3G14790	oxidation-reduction process		GO:0055114	29342	proc	other metabolic processes	IEA	AnalysisReference:501756968		09/23/2017 00:00:00
AT3G14790	2099372	AT3G14790	nucleotide-sugar metabolic process		GO:0009225	6567	proc	other cellular processes | other metabolic processes	ISS	Communication:501714663	TIGR	2002-04-11
AT3G15880	2093222	AT3G15880	primary shoot apical meristem specification	RNA processingtranscription, DNA-templatedprimary shoot apical meristem specification	GO:0010072	14812	proc	developmental processes	IGI	Publication:501719447|PMID:16763149	TAIR	09/28/2006 00:00:00
AT3G15880	2093222	AT3G15880	regulation of transcription, DNA-templated		GO:0006355	7461	proc	other cellular processes | other metabolic processes | transcription,DNA-dependent	IEA	AnalysisReference:501756968		09/23/2017 00:00:00
AT3G15880	2093222	AT3G15880	RNA processing		GO:0006396	4902	proc	other cellular processes | other metabolic processes	IEA	AnalysisReference:501756966		08/31/2017 00:00:00
AT3G15880	2093222	AT3G15880	transcription, DNA-templated		GO:0006351	7470	proc	transcription,DNA-dependent	IEA	AnalysisReference:501756968		09/23/2017 00:00:00
AT3G15880	2093222	AT3G15880	regulation of transcription, DNA-templated		GO:0006355	7461	proc	other cellular processes | transcription,DNA-dependent | other metabolic processes	IEA	AnalysisReference:501756966		09/27/2017 00:00:00
AT3G24300	2087173	AT3G24300	lateral root formation	transportorganic cation transportammonium transportlateral root formation	GO:0010311	25479	proc	developmental processes	IMP	Publication:501741051|PMID:21119058		2011-07-02
AT3G24300	2087173	AT3G24300	ammonium transmembrane transport		GO:0072488	36839	proc	transport	IEA	AnalysisReference:501756966		09/23/2017 00:00:00
AT3G24300	2087173	AT3G24300	ammonium transport		GO:0015696	5112	proc	transport	IMP	Publication:501720174|PMID:17026539	TAIR	2008-07-06
AT3G24300	2087173	AT3G24300	organic cation transport		GO:0015695	6606	proc	transport	IBA	Communication:501741973		11/26/2015 00:00:00
AT3G24300	2087173	AT3G24300	lateral root branching		GO:0080181	38876	proc	developmental processes	IMP	Publication:501741051|PMID:21119058	TAIR	06/13/2012 00:00:00
AT3G24300	2087173	AT3G24300	transport		GO:0006810	7489	proc	transport	ISS	Communication:501714663	TIGR	09/24/2003 00:00:00
AT3G46440	2078206	AT3G46440	D-xylose metabolic process	D-xylose metabolic processnucleotide-sugar metabolic process	GO:0042732	14900	proc	other metabolic processes	TAS	Publication:501682867|PMID:12481102	TAIR	07/18/2003 00:00:00
AT3G46440	2078206	AT3G46440	nucleotide-sugar metabolic process		GO:0009225	6567	proc	other metabolic processes | other cellular processes	ISS	Communication:501714663	TIGR	2002-04-11
AT3G46440	2078206	AT3G46440	UDP-D-xylose biosynthetic process		GO:0033320	27379	proc	other cellular processes | other metabolic processes	IEA	AnalysisReference:501757242		09/23/2017 00:00:00
AT3G49210	2082936	AT3G49210	glycerolipid biosynthetic process	glycerolipid biosynthetic process	GO:0045017	11232	proc	other cellular processes | other metabolic processes	IEA	AnalysisReference:501756966		02/16/2017 00:00:00
AT3G53390	2083996	AT3G53390	biological_process_unknown	unknown	GO:0008150	5239	proc	unknown biological processes	ND	Communication:1345790	TAIR	10/19/2006 00:00:00
AT3G63460	2087433	AT3G63460	vesicle-mediated transport	protein transportvesicle-mediated transport	GO:0016192	7567	proc	transport	IEA	AnalysisReference:501756968		09/23/2017 00:00:00
AT3G63460	2087433	AT3G63460	protein transport		GO:0015031	6910	proc	transport	IEA	AnalysisReference:501756968		09/23/2017 00:00:00
AT4G01290	2124948	AT4G01290	biological_process_unknown	unknown	GO:0008150	5239	proc	unknown biological processes	ND	Communication:1345790	TAIR	10/19/2006 00:00:00
AT4G05150	2115658	AT4G05150	protein autophosphorylation	protein autophosphorylation	GO:0046777	13750	proc	other metabolic processes | protein metabolism | other cellular processes	IDA	Publication:501742526|PMID:21477822	TAIR	2011-04-05
AT4G05150	2115658	AT4G05150	protein autophosphorylation		GO:0046777	13750	proc	other metabolic processes | protein metabolism | other cellular processes	IDA	Publication:501742526|PMID:21477822	TAIR	2011-04-05
AT4G11740	2139787	AT4G11740	vesicle-mediated transport	vesicle-mediated transport	GO:0016192	7567	proc	transport	TAS	Publication:570|PMID:10758485	TAIR	2003-08-04
AT4G24580	2121865	AT4G24580	negative regulation of Rho protein signal transduction	signal transductionnegative regulation of Rho protein signal transductionpollen tube developmentpollen tube adhesionactivation of GTPase activitypollen germination	GO:0035024	17236	proc	signal transduction | other cellular processes	IMP	Publication:501729267|PMID:19108776	TAIR	2009-09-02
AT4G24580	2121865	AT4G24580	signal transduction		GO:0007165	7243	proc	signal transduction	ISS	Publication:501713226|PMID:15358268	TAIR	02/13/2009 00:00:00
AT4G24580	2121865	AT4G24580	pollen tube development		GO:0048868	25766	proc	other biological processes	IMP	Publication:501729267|PMID:19108776	TAIR	2009-09-02
AT4G24580	2121865	AT4G24580	pollen tube adhesion		GO:0009865	10024	proc	other cellular processes	IMP	Publication:501729267|PMID:19108776	TAIR	2009-09-02
AT4G24580	2121865	AT4G24580	activation of GTPase activity		GO:0090630	49178	proc	other biological processes	IDA	Publication:501729267|PMID:19108776	TAIR	03/24/2015 00:00:00
AT4G24580	2121865	AT4G24580	pollen germination		GO:0009846	10881	proc	other biological processes	IMP	Publication:501729267|PMID:19108776	TAIR	2009-09-02
AT4G30190	2128941	AT4G30190	ATP hydrolysis coupled proton transport	ATP biosynthetic processATP hydrolysis coupled proton transport	GO:0015991	4696	proc	transport	IDA	Publication:4963|PMID:8300635		2016-01-08
AT4G30190	2128941	AT4G30190	ATP biosynthetic process		GO:0006754	4694	proc	other metabolic processes | other cellular processes	IEA	AnalysisReference:501756966		09/23/2017 00:00:00
AT5G04990	2175354	AT5G04990	meiotic attachment of telomere to nuclear envelope	nucleus organizationmeiotic attachment of telomere to nuclear envelopeprotein heterooligomerizationprotein homooligomerizationprotein localization to nuclear enveloperegulation of establishment or maintenance of cell polarity regulating cell shape	GO:0070197	31104	proc	cell organization and biogenesis | other cellular processes	IMP	Publication:501761978|PMID:25412930		2017-05-07
AT5G04990	2175354	AT5G04990	nucleus organization		GO:0006997	6521	proc	cell organization and biogenesis	IMP	Publication:501741872|PMID:21294795		2016-01-08
AT5G04990	2175354	AT5G04990	nucleus organization		GO:0006997	6521	proc	cell organization and biogenesis	IMP	Publication:501761385|PMID:25217773	TAIR	10/24/2014 00:00:00
AT5G04990	2175354	AT5G04990	nucleus organization		GO:0006997	6521	proc	cell organization and biogenesis	IGI	Publication:501747056|PMID:22270916	TAIR	07/30/2012 00:00:00
AT5G04990	2175354	AT5G04990	protein heterooligomerization		GO:0051291	19868	proc	cell organization and biogenesis	IDA	Publication:501735240|PMID:19807882		2016-01-08
AT5G04990	2175354	AT5G04990	protein homooligomerization		GO:0051260	19376	proc	cell organization and biogenesis	IDA	Publication:501735240|PMID:19807882		2016-01-08
AT5G04990	2175354	AT5G04990	protein localization to nuclear envelope		GO:0090435	43096	proc	cell organization and biogenesis	IDA	Publication:501761894|PMID:24667841		2016-01-08
AT5G04990	2175354	AT5G04990	protein localization to nuclear envelope		GO:0090435	43096	proc	cell organization and biogenesis	IMP	Publication:501747056|PMID:22270916	TAIR	07/31/2012 00:00:00
AT5G04990	2175354	AT5G04990	regulation of establishment or maintenance of cell polarity regulating cell shape		GO:2000769	38485	proc	cell organization and biogenesis | other cellular processes	IMP	Publication:501763504|PMID:25759303		2017-05-07
AT5G11110	2184891	AT5G11110	nectar secretion	sucrose biosynthetic processnectar secretionpollen wall assembly	GO:0071836	36109	proc	transport	IMP	Publication:501759265|PMID:24670640		2016-01-08
AT5G11110	2184891	AT5G11110	nectar secretion		GO:0071836	36109	proc	transport	IMP	Publication:501759265|PMID:24670640		2016-01-08
AT5G11110	2184891	AT5G11110	nectar secretion		GO:0071836	36109	proc	transport	IMP	Publication:501759265|PMID:24670640		2016-01-08
AT5G11110	2184891	AT5G11110	pollen wall assembly		GO:0010208	12142	proc	other cellular processes | developmental processes | cell organization and biogenesis	IMP	Publication:501728784|PMID:18779216		2016-01-08
AT5G11110	2184891	AT5G11110	pollen wall assembly		GO:0010208	12142	proc	other cellular processes | developmental processes | cell organization and biogenesis	IMP	Publication:501728784|PMID:18779216		2016-01-08
AT5G11110	2184891	AT5G11110	pollen wall assembly		GO:0010208	12142	proc	other cellular processes | developmental processes | cell organization and biogenesis	IMP	Publication:501728784|PMID:18779216		2016-01-08
AT5G11110	2184891	AT5G11110	sucrose biosynthetic process		GO:0005986	7345	proc	other metabolic processes | other cellular processes	IEA	AnalysisReference:501757242		09/23/2017 00:00:00
AT5G11110	2184891	AT5G11110	sucrose biosynthetic process		GO:0005986	7345	proc	other metabolic processes | other cellular processes	IEA	AnalysisReference:501757242		09/23/2017 00:00:00
AT5G11110	2184891	AT5G11110	sucrose biosynthetic process		GO:0005986	7345	proc	other metabolic processes | other cellular processes	IEA	AnalysisReference:501757242		09/23/2017 00:00:00
AT5G16300	2171302	AT5G16300	intra-Golgi vesicle-mediated transport	intra-Golgi vesicle-mediated transport	GO:0006891	6086	proc	transport	IEA	AnalysisReference:501756966		09/23/2017 00:00:00
AT5G16300	2171302	AT5G16300	intra-Golgi vesicle-mediated transport		GO:0006891	6086	proc	transport	IEA	AnalysisReference:501756966		09/23/2017 00:00:00
AT5G17390	2178920	AT5G17390	response to stress	response to stress	GO:0006950	7330	proc	response to stress	IEA	AnalysisReference:501756966		09/23/2017 00:00:00
AT5G17920	2170318	AT5G17920	homocysteine metabolic process	homocysteine metabolic processmethionine biosynthetic processmethylationresponse to cadmium ionresponse to salt stressresponse to zinc ion	GO:0050667	17592	proc	other cellular processes | other metabolic processes	IBA	Communication:501741973		2015-04-09
AT5G17920	2170318	AT5G17920	methionine biosynthetic process		GO:0009086	6344	proc	other metabolic processes | other cellular processes	IEA	AnalysisReference:501756968		09/23/2017 00:00:00
AT5G17920	2170318	AT5G17920	methionine biosynthetic process		GO:0009086	6344	proc	other metabolic processes | other cellular processes	ISS	Communication:501714663	TIGR	2003-08-09
AT5G17920	2170318	AT5G17920	methylation		GO:0032259	24571	proc	other metabolic processes	IEA	AnalysisReference:501756968		09/23/2017 00:00:00
AT5G17920	2170317	AT5G17920.1	response to cadmium ion		GO:0046686	13588	proc	other biological processes	IEP	Publication:501718481|PMID:16502469		05/25/2010 00:00:00
AT5G17920	4010713139	AT5G17920.2	response to salt stress		GO:0009651	7182	proc	response to stress | response to abiotic or biotic stimulus	IEP	Publication:501723430|PMID:17916636		2008-03-10
AT5G17920	2170317	AT5G17920.1	response to salt stress		GO:0009651	7182	proc	response to abiotic or biotic stimulus | response to stress	IEP	Publication:501723430|PMID:17916636		2008-03-10
AT5G17920	2170318	AT5G17920	response to zinc ion		GO:0010043	12087	proc	other biological processes	IEP	Publication:501735543|PMID:19880396	TAIR	02/26/2010 00:00:00
AT5G19050	2179634	AT5G19050	biological_process_unknown	unknown	GO:0008150	5239	proc	unknown biological processes	ND	Communication:1345790	TAIR	10/19/2006 00:00:00
AT5G20280	2149179	AT5G20280	sucrose biosynthetic process	sucrose biosynthetic processnectar secretion	GO:0005986	7345	proc	other metabolic processes | other cellular processes	IEA	AnalysisReference:501757242		09/23/2017 00:00:00
AT5G20280	2149179	AT5G20280	nectar secretion		GO:0071836	36109	proc	transport	IMP	Publication:501759265|PMID:24670640		2016-01-08
AT5G25010	2179245	AT5G25010	biological_process_unknown	unknown	GO:0008150	5239	proc	unknown biological processes	ND	Communication:1345790	TAIR	10/19/2006 00:00:00
AT5G28040	2143764	AT5G28040	regulation of transcription, DNA-templated	regulation of transcription, DNA-templated	GO:0006355	7461	proc	other cellular processes | other metabolic processes | transcription,DNA-dependent	TAS	Publication:501682971|PMID:12535344		2011-03-06
AT5G36880	2149104	AT5G36880	fatty acid metabolic process	fatty acid metabolic processacetate metabolic processacetyl-CoA biosynthetic process from acetate	GO:0006631	5754	proc	other metabolic processes | other cellular processes	IEA	AnalysisReference:501756968		09/23/2017 00:00:00
AT5G36880	2149104	AT5G36880	acetate metabolic process		GO:0006083	4974	proc	other metabolic processes | other cellular processes	IMP	Publication:501725139|PMID:18552233	TAIR	09/25/2009 00:00:00
AT5G36880	2149104	AT5G36880	acetyl-CoA biosynthetic process from acetate		GO:0019427	10630	proc	other metabolic processes | other cellular processes	IEA	AnalysisReference:501756966		09/23/2017 00:00:00
AT5G40390	2170528	AT5G40390	carbohydrate metabolic process	carbohydrate metabolic processmannitol biosynthetic processraffinose family oligosaccharide biosynthetic processresponse to abscisic acidresponse to oxidative stressresponse to water deprivationsucrose biosynthetic process	GO:0005975	5291	proc	other metabolic processes	IEA	AnalysisReference:501756968		09/23/2017 00:00:00
AT5G40390	2170528	AT5G40390	mannitol biosynthetic process		GO:0019593	10471	proc	other metabolic processes | other cellular processes	IMP	Publication:501706700	TAIR	11/29/2006 00:00:00
AT5G40390	2170528	AT5G40390	raffinose family oligosaccharide biosynthetic process		GO:0010325	26463	proc	other metabolic processes	IMP	Publication:501706700	TAIR	2007-02-02
AT5G40390	2170528	AT5G40390	response to abscisic acid		GO:0009737	11395	proc	other biological processes	IDA	Publication:501739724|PMID:20733066	TAIR	10/30/2010 00:00:00
AT5G40390	2170528	AT5G40390	response to oxidative stress		GO:0006979	6625	proc	response to stress	IEP	Publication:501724697|PMID:18502973	TAIR	04/26/2011 00:00:00
AT5G40390	2170528	AT5G40390	response to water deprivation		GO:0009414	5647	proc	response to abiotic or biotic stimulus | response to stress	IEP	Publication:501730567|PMID:19502356		09/30/2009 00:00:00
AT5G40390	2170528	AT5G40390	sucrose biosynthetic process		GO:0005986	7345	proc	other cellular processes | other metabolic processes	IMP	Publication:501706700	TAIR	11/29/2006 00:00:00
AT5G49680	2157052	AT5G49680	pollen tube growth	pollen tube growthroot hair cell tip growth	GO:0009860	10927	proc	other cellular processes | cell organization and biogenesis	IMP	Publication:501711624|PMID:14675453		2016-01-08
AT5G49680	2157052	AT5G49680	root hair cell tip growth		GO:0048768	22773	proc	cell organization and biogenesis | developmental processes | other cellular processes	IMP	Publication:501711624|PMID:14675453		2016-01-08
AT5G52200	2145146	AT5G52200	regulation of phosphoprotein phosphatase activity	regulation of signal transductionregulation of phosphoprotein phosphatase activity	GO:0043666	23618	proc	protein metabolism | other metabolic processes | other cellular processes	IEA	AnalysisReference:501756966		2017-12-04
AT5G52200	2145146	AT5G52200	regulation of signal transduction		GO:0009966	13829	proc	other cellular processes | signal transduction	IEA	AnalysisReference:501756966		2017-12-04
AT5G52200	2145146	AT5G52200	regulation of protein serine/threonine phosphatase activity		GO:0080163	35952	proc	other metabolic processes | other cellular processes | protein metabolism	IDA	Publication:501741364|PMID:21222654	TAIR	04/19/2011 00:00:00
AT5G57610	2174552	AT5G57610	protein phosphorylation	protein phosphorylation	GO:0006468	6897	proc	other cellular processes | other metabolic processes | protein metabolism	ISS	Publication:501718348|PMID:16429265		2017-07-10
AT5G57610	2174552	AT5G57610	protein phosphorylation		GO:0006468	6897	proc	other cellular processes | other metabolic processes | protein metabolism	ISS	Communication:501714663	TIGR	08/22/2003 00:00:00
AT5G57610	2174552	AT5G57610	protein phosphorylation		GO:0006468	6897	proc	other cellular processes | other metabolic processes | protein metabolism	ISS	Publication:501718348|PMID:16429265		2017-07-10
AT5G57610	2174552	AT5G57610	protein phosphorylation		GO:0006468	6897	proc	other cellular processes | other metabolic processes | protein metabolism	ISS	Communication:501714663	TIGR	08/22/2003 00:00:00
AT5G57830	2174408	AT5G57830	biological_process_unknown	unknown	GO:0008150	5239	proc	unknown biological processes	ND	Communication:501683652	TIGR	09/13/2003 00:00:00
AT5G61350	2163158	AT5G61350	regulation of calcium ion transport	protein phosphorylationregulation of calcium ion transportroot hair cell developmentcellular ammonia homeostasis	GO:0051924	23185	proc	transport	IMP	Publication:501759625|PMID:24769480		05/15/2014 00:00:00
AT5G61350	2163158	AT5G61350	protein phosphorylation		GO:0006468	6897	proc	other cellular processes | protein metabolism | other metabolic processes	IEA	AnalysisReference:501756966		09/23/2017 00:00:00
AT5G61350	2163158	AT5G61350	root hair cell development		GO:0080147	35039	proc	other cellular processes | developmental processes	IMP	Publication:501759625|PMID:24769480		05/13/2014 00:00:00
AT5G61350	2163158	AT5G61350	cellular ammonia homeostasis		GO:0097275	40454	proc	other cellular processes	IMP	Publication:501759625|PMID:24769480		05/13/2014 00:00:00
AT5G63270	2162002	AT5G63270	response to nitrate	response to nitrate	GO:0010167	12141	proc	other biological processes	ISS	Communication:501714663	TIGR	2003-02-10
AT5G64220	2173368	AT5G64220	response to cold	regulation of transcription, DNA-templatedresponse to coldcellular response to aluminum ion	GO:0009409	5433	proc	response to stress | response to abiotic or biotic stimulus	IMP	Publication:501754420|PMID:23581962		05/31/2013 00:00:00
AT5G64220	2173368	AT5G64220	positive regulation of transcription from RNA polymerase II promoter		GO:0045944	12514	proc	other metabolic processes | transcription,DNA-dependent | other cellular processes	IBA	Communication:501741973		08/13/2015 00:00:00
AT5G64220	2173368	AT5G64220	regulation of transcription, DNA-templated		GO:0006355	7461	proc	transcription,DNA-dependent | other metabolic processes | other cellular processes	TAS	Publication:501682352|PMID:12218065		2011-03-06
AT5G64220	2173368	AT5G64220	positive regulation of transcription, DNA-templated		GO:0045893	12513	proc	other metabolic processes | other cellular processes | transcription,DNA-dependent	IMP	Publication:501762692|PMID:25627216		04/30/2015 00:00:00
AT5G64220	2173368	AT5G64220	cellular response to aluminum ion		GO:0071275	33800	proc	other cellular processes	IEP	Publication:501762692|PMID:25627216		04/30/2015 00:00:00
AT5G66280	2155036	AT5G66280	nucleotide-sugar metabolic process	nucleotide-sugar metabolic processGDP-mannose metabolic process	GO:0009225	6567	proc	other cellular processes | other metabolic processes	ISS	Communication:501714663	TIGR	09/16/2003 00:00:00
AT5G66280	2155036	AT5G66280	GDP-mannose metabolic process		GO:0019673	10484	proc	other cellular processes | other metabolic processes	IEA	AnalysisReference:501756966		09/23/2017 00:00:00
AT5G66280	2155036	AT5G66280	'de novo' GDP-L-fucose biosynthetic process		GO:0042351	11927	proc	other metabolic processes | other cellular processes	IEA	AnalysisReference:501757242		09/23/2017 00:00:00
