# Supplementary material for: The Arabidopsis Root Tip (Phospho)Proteomes at Growth-Promoting versus Growth-Repressing Conditions Reveal Novel Root Growth Regulators
Source: Cells. 2021 Jul 2;10(7):1665. doi: 10.3390/cells10071665 (PMC8303113; doi:10.3390/cells10071665)
Supplement: Supplementary file 1 [file cells-10-01665-s001.zip › Nikonorova_Table S8.xlsx]

## Sheet: Putative kinases
Table S8. List of putative kinases in phosphoproteome data set.
Protein	Amino acid	Position	Name	Description		hmm acc (hmm name)	ANOVA p value	ANOVA q-value	Profile of log2 fold change of differentially abundant phosphorylation site (left to right: 0.1, 10, 100 nM NAA)	% of valid values for unique phosphorylation sites	Log2 FC 0.1 nM	Log2 FC 10 nM	Log2 FC 100 nM	% of valid values for unique phosphorylation sites (Mock)	% of valid values for unique phosphorylation sites (0.1 nM NAA)	% of valid values for unique phosphorylation sites (10 nM NAA)	% of valid values for unique phosphorylation sites (100 nM NAA)
AT1G18150	S	539	MITOGEN-ACTIVATED PROTEIN KINASE 8 (MPK8)	Encodes mitogen-activated protein kinase 8 (MPK8). MPK8 connects protein phosphorylation, Ca2+, and ROS in the wound-signaling pathway.	nucleus, plasma membrane, cytoplasm	PF00069.24 (Pkinase); PF07714.16 (Pkinase_Tyr); PF12330.7 (Haspin_kinase)	0.000785897	0.0121127			-0.518797	-0.357591	0.298595
AT1G51800	S	561	IMPAIRED OOMYCETE SUSCEPTIBILITY 1 (IOS1)	The gene encodes a putative member of the LRR-RLK protein family. Expressin and mutant analysis revealed that it contributes to the interaction between Arabidopsis and Hyaloperonospora arabidopsidis	plasma membrane	PF00069.24 (Pkinase_Tyr); PF07714.16 (Pkinase)	0.0308884	0.113114			-0.030322	-0.0207074	-0.616835
AT2G37840	S	311		Protein kinase superfamily protein	autophagosome	PF00069.24 (Pkinase_Tyr); PF07714.16 (Pkinase)	0.0411738	0.132608			0.783806	0.301226	0.914048
AT3G02880	S	621		Leucine-rich repeat protein kinase family protein	membrane	PF00069.24 (Pkinase_Tyr); PF07714.16 (Pkinase)	0.0399862	0.129044			0.013348	-0.0107815	0.365126
AT3G02880	S	626		Leucine-rich repeat protein kinase family protein	membrane	PF00069.24 (Pkinase_Tyr); PF07714.16 (Pkinase)	0.0351659	0.121098			0.303009	0.262676	0.444914
AT3G13530	S	922	MITOGEN-ACTIVATED PROTEIN KINASE KINASE KINASE 7 (MAPKKK7)	MAP3K epsilon protein kinase 1 is functionally redundant with MAP3Ke2. Required for pollen development but not essential. map3ke1;map3ke2 double-mutant pollen grains develop plasma membrane irregularities following pollen mitosis I. Localized primarily in the plasma membrane. Expressed in leaf trichomes, root columella cells and developing ovules.	plasma membrane, nucleus, cytoskeleton	PF00069.24 (Pkinase_Tyr); PF07714.16 (Pkinase)	0.0254052	0.10238			-0.110337	-0.177015	-0.454642
AT3G13530	S	882	MITOGEN-ACTIVATED PROTEIN KINASE KINASE KINASE 7 (MAPKKK7)	MAP3K epsilon protein kinase 1 is functionally redundant with MAP3Ke2. Required for pollen development but not essential. map3ke1;map3ke2 double-mutant pollen grains develop plasma membrane irregularities following pollen mitosis I. Localized primarily in the plasma membrane. Expressed in leaf trichomes, root columella cells and developing ovules.	plasma membrane, nucleus, cytoskeleton	PF00069.24 (Pkinase_Tyr); PF07714.16 (Pkinase)								80	80	20	80
AT3G20410	T	37	CALCIUM-DEPENDENT PROTEIN KINASE 9 (CDPK9); CALMODULIN-DOMAIN PROTEIN KINASE 9 (CPK9)	calmodulin-domain protein kinase CDPK isoform 9 (CPK9)	plasma membrane	PF00069.24 (Pkinase); PF07714.16 (Pkinase_Tyr); PF14531.5 (Kinase-like)	0.015264	0.070563			0.333796	0.297598	0.580136
AT3G53930	S	398		Protein kinase superfamily protein	autophagosome	PF00069.24 (Pkinase_Tyr); PF07714.16 (Pkinase)
AT3G58640	S	371		Mitogen activated protein kinase kinase kinase-like protein	intracellular	PF00069.24 (Pkinase_Tyr); PF07714.16 (Pkinase)	0.0335084	0.117032			0.121988	-0.449324	-0.098719
AT3G58640	S	320		Mitogen activated protein kinase kinase kinase-like protein	intracellular	PF00069.24 (Pkinase_Tyr); PF07714.16 (Pkinase)	0.00219094	0.0236226			-0.690432	0.05619	-0.326816
AT4G20940	S	688	GUARD CELL HYDROGEN PEROXIDE-RESISTANT 1 (GHR1)	Encodes a plasma-membrane localized LRR receptor-like protein involved in both ABA and H202 mediated signaling involved in stomatal movement.	plasma membrane	PF00069.24 (Pkinase_Tyr); PF07714.16 (Pkinase)	0.0148903	0.069985			0.049092	0.116896	-0.481116
AT4G24100	S	499		Protein kinase superfamily protein	plasma membrane, cytoplasm	PF00069.24 (Pkinase); PF07714.16 (Pkinase_Tyr); PF14531.5 (Kinase-like)	0.0434256	0.135876			0.465777	0.0691114	0.470011
AT4G29810	T	31	MAP KINASE KINASE 2 (MKK2)	encodes a MAP kinase kinase 2 that regulates MPK6 and MPK4 in response to cold and salt stresses. Co-expression with MEKK1 in protoplasts activated MKK2 activity, suggesting that MEKK1 may be a regulator of MKK2.	plasma membrane, cytoplasm	PF00069.24 (Pkinase); PF07714.16 (Pkinase_Tyr); PF12330.7 (Haspin_kinase); PF14531.5 (Kinase-like)								0	100	20	80
AT5G03320	S	22	PATTERN-TRIGGERED IMMUNITY COMPROMISED RECEPTOR-LIKE CYTOPLASMIC KINASE 2 (PCRK2)	Protein kinase superfamily protein	plasma membrane	PF00069.24 (Pkinase); PF07714.16 (Pkinase_Tyr); PF14531.5 (Kinase-like)	0.0299592	0.111			-0.459368	-0.158474	-0.682282
AT5G15270	S	140		RNA-binding KH domain-containing protein		PF02895.13 (H-kinase_dim)	0.0121081	0.0620747			1.12028	-0.351094	0.267311
AT5G22840	S	494	SRPK3	Protein kinase superfamily protein	Nucleus, cytoplasm	PF00069.24 (Pkinase_Tyr); PF07714.16 (Pkinase)	0.0236132	0.096795			-0.528942	0.028794	-0.807711
AT5G54380	S	668	THESEUS1 (THE1)	Encodes THESEUS1 (THE1), a receptor kinase regulated by Brassinosteroids and required for cell elongation during vegetative growth.	Plasma membrane	PF00069.24 (Pkinase_Tyr); PF07714.16 (Pkinase)								20	80	80	100
AT5G57610	S	169		kinase superfamily with octicosapeptide/Phox/Bem1p domain-containing protein	Cytoplasm	PF00069.24 (Pkinase_Tyr); PF07714.16 (Pkinase)	0.0155393	0.0713676			-0.452201	0.00010076	0.105796
AT5G57610	S	14		kinase superfamily with octicosapeptide/Phox/Bem1p domain-containing protein	Cytoplasm	PF00069.24 (Pkinase_Tyr); PF07714.16 (Pkinase)	0.00567263	0.0420988			-0.179567	0.0967058	0.381881
AT5G61350	S	497	ERULUS (ERU); [CA2+]CYT-ASSOCIATED PROTEIN KINASE 1 (CAP1)	Encodes a tonoplast-localized receptor-like kinase that regulates root hair tip growth by maintaining cytoplasmic Ca2+ gradients. Knockouts of CAP1 produced more cytoplasmic NH4+ and ceased growth of root hairs on MS medium except when NH4+ was depleted; NH4+ depletion reestablished the Ca2+ gradient necessary for normal growth. The lower net NH4+ influx across the vacuolar membrane and relativel…	Membrane	PF00069.24 (Pkinase_Tyr); PF07714.16 (Pkinase)	0.000242611	0.00663158			0.28072	0.285918	2.51317

## Sheet: HMMER raw output
seq id	hmm acc	hmm name	hmm start	hmm end	hmm length	bit score	Individual E-value	Conditional E-value	database significant	outcompeted	clan
AT1G18150	PF12330.7	Haspin_kinase	186	266	367	16.16	0.0037	1.1e-06	0	1	CL0016
AT1G18150	PF00069.24	Pkinase	1	264	264	222.48	5.7e-66	1.7e-69	1	0	CL0016
AT1G18150	PF07714.16	Pkinase_Tyr	2	211	260	105.33	2.9e-30	8.6e-34	1	1	CL0016
AT1G51800	PF00069.24	Pkinase	4	259	264	153.65	5.6e-45	2e-48	1	1	CL0016
AT1G51800	PF07714.16	Pkinase_Tyr	3	260	260	153.69	5.1e-45	1.8e-48	1	0	CL0016
AT2G37840	PF00069.24	Pkinase	3	264	264	246.51	2.7e-73	9.6e-77	1	0	CL0016
AT2G37840	PF07714.16	Pkinase_Tyr	4	256	260	154.73	2.4e-45	8.8e-49	1	1	CL0016
AT3G02880	PF00069.24	Pkinase	5	258	264	123.95	6.5e-36	7e-39	1	0	CL0016
AT3G02880	PF07714.16	Pkinase_Tyr	5	258	260	118.99	2e-34	2.1e-37	1	1	CL0016
AT3G13530	PF00069.24	Pkinase	2	264	264	247.27	1.6e-73	4.7e-77	1	0	CL0016
AT3G13530	PF07714.16	Pkinase_Tyr	3	258	260	175.38	1.2e-51	3.7e-55	1	1	CL0016
AT3G20410	PF14531.5	Kinase-like	139	288	288	17.64	0.0017	1.6e-06	0	1	CL0016
AT3G20410	PF00069.24	Pkinase	1	264	264	253.85	1.5e-75	1.5e-78	1	0	CL0016
AT3G20410	PF07714.16	Pkinase_Tyr	2	257	260	108.52	3.1e-31	2.9e-34	1	1	CL0016
AT3G53930	PF00069.24	Pkinase	1	264	264	245.55	5.2e-73	1.6e-76	1	0	CL0016
AT3G53930	PF07714.16	Pkinase_Tyr	3	256	260	158.14	2.2e-46	6.7e-50	1	1	CL0016
AT3G58640	PF00069.24	Pkinase	3	259	264	177.6	2.8e-52	1.2e-55	1	1	CL0016
AT3G58640	PF07714.16	Pkinase_Tyr	2	260	260	205.99	5.6e-61	2.3e-64	1	0	CL0016
AT4G20940	PF00069.24	Pkinase	5	195	264	87.51	8.4e-25	9.6e-28	1	1	CL0016
AT4G20940	PF07714.16	Pkinase_Tyr	5	203	260	100.96	6.2e-29	7.1e-32	1	0	CL0016
AT4G24100	PF14531.5	Kinase-like	154	254	288	22.24	6.7e-05	3.2e-08	0	1	CL0016
AT4G24100	PF00069.24	Pkinase	1	264	264	204.7	1.5e-60	7.2e-64	1	0	CL0016
AT4G24100	PF07714.16	Pkinase_Tyr	2	258	260	153.63	5.3e-45	2.5e-48	1	1	CL0016
AT4G29810	PF12330.7	Haspin_kinase	144	257	367	20.68	0.00016	8.4e-08	0	1	CL0016
AT4G29810	PF14531.5	Kinase-like	16	57	288	6.11	5.5	0.003	0	1	CL0016
AT4G29810	PF14531.5	Kinase-like	161	256	288	18.91	0.00069	3.7e-07	0	1	CL0016
AT4G29810	PF00069.24	Pkinase	4	264	264	240.85	1.4e-71	7.6e-75	1	0	CL0016
AT4G29810	PF07714.16	Pkinase_Tyr	2	258	260	134.7	3.2e-39	1.7e-42	1	1	CL0016
AT5G03320	PF14531.5	Kinase-like	163	263	288	17.7	0.0016	3.9e-07	0	1	CL0016
AT5G03320	PF00069.24	Pkinase	3	260	264	147.11	5.6e-43	1.3e-46	1	0	CL0016
AT5G03320	PF07714.16	Pkinase_Tyr	6	258	260	146.74	6.7e-43	1.6e-46	1	1	CL0016
AT5G15270	PF02895.13	H-kinase_dim	12	45	69	9.75	0.99	0.0003	0	0	CL0025
AT5G15270	PF02895.13	H-kinase_dim	12	36	69	4.8	35	0.01	0	0	CL0025
AT5G22840	PF00069.24	Pkinase	1	132	264	72.14	4.1e-20	7.4e-24	1	0	CL0016
AT5G22840	PF00069.24	Pkinase	129	264	264	78.32	5.4e-22	9.7e-26	1	0	CL0016
AT5G22840	PF07714.16	Pkinase_Tyr	3	139	260	41.4	9.2e-11	1.7e-14	1	1	CL0016
AT5G22840	PF07714.16	Pkinase_Tyr	135	204	260	23.88	2.1e-05	3.7e-09	1	1	CL0016
AT5G54380	PF00069.24	Pkinase	2	257	264	148.76	1.7e-43	1.3e-46	1	1	CL0016
AT5G54380	PF07714.16	Pkinase_Tyr	5	253	260	163.27	6.1e-48	4.4e-51	1	0	CL0016
AT5G57610	PF00069.24	Pkinase	2	260	264	165.76	1.1e-48	2e-52	1	1	CL0016
AT5G57610	PF07714.16	Pkinase_Tyr	2	260	260	207.68	1.7e-61	3.1e-65	1	0	CL0016
AT5G61350	PF00069.24	Pkinase	4	212	264	144.11	4.6e-42	1.1e-45	1	1	CL0016
AT5G61350	PF07714.16	Pkinase_Tyr	6	204	260	154.74	2.4e-45	5.8e-49	1	0	CL0016
