# Supplementary material for: The Arabidopsis Root Tip (Phospho)Proteomes at Growth-Promoting versus Growth-Repressing Conditions Reveal Novel Root Growth Regulators
Source: Cells. 2021 Jul 2;10(7):1665. doi: 10.3390/cells10071665 (PMC8303113; doi:10.3390/cells10071665)
Supplement: Supplementary file 1 [file cells-10-01665-s001.zip › Nikonorova_Table S9.xlsx]

## Sheet: All identifications
Table S9. Proteome analysis of Col-0 versus mkk1 and mkk2
Majority protein IDs	Fasta headers	Score	Peptide counts (all)	Peptide counts (unique)	LFQ intensity mkk1-1	LFQ intensity mkk1-2	LFQ intensity mkk1-3	LFQ intensity mkk2-1	LFQ intensity mkk2-2	LFQ intensity mkk2-3	LFQ intensity WT-1	LFQ intensity WT-2	LFQ intensity WT-3
AT1G01050.1	pyrophosphorylase 1	30.715	6	3	149920000	152910000	312970000	278230000	279070000	234570000	201100000	210170000	147010000
AT1G01090.1	pyruvate dehydrogenase E1 alpha	160.25	11	11	314330000	259620000	410170000	273950000	278410000	305320000	340230000	321770000	349160000
AT1G01100.4;AT1G01100.2;AT1G01100.1;AT1G01100.3	60S acidic ribosomal protein family ; 60S acidic ribosomal protein family ; 60S acidic ribosomal protein family ; 60S acidic ribosomal protein family	141.35	3;3;3;2	2;2;2;1	728590000	730540000	1032700000	755400000	907720000	861260000	870030000	880420000	761180000
AT2G15090.1;AT4G34250.1;AT1G68530.1;AT2G26640.1;AT1G19440.1;AT1G04220.1;AT1G01120.1;AT5G43760.1	3-ketoacyl-CoA synthase 8 ; 3-ketoacyl-CoA synthase 16 ; 3-ketoacyl-CoA synthase 6 ; 3-ketoacyl-CoA synthase 11 ; 3-ketoacyl-CoA synthase 4 ; 3-ketoacyl-CoA synthase 2 ; 3-ketoacyl-CoA synthase 1 ; 3-ketoacyl-CoA synthase 20	2.5048	1;1;1;1;1;1;1;1	1;1;1;1;1;1;1;1	0	0	0	0	0	0	0	0	31483000
AT1G01300.1	Eukaryotic aspartyl protease family protein	12.004	2	2	0	53445000	59104000	70178000	0	55635000	61738000	71896000	0
AT1G01470.1	Late embryogenesis abundant protein	44.039	2	2	190220000	184060000	273800000	144670000	167180000	164820000	209520000	239950000	157480000
AT4G00400.1;AT1G01610.1	glycerol-3-phosphate acyltransferase 8 ; glycerol-3-phosphate acyltransferase 4	30.468	2;2	2;2	0	36467000	30452000	0	32223000	32369000	29264000	0	0
AT1G01620.1;AT1G01620.2	plasma membrane intrinsic protein 1C ; plasma membrane intrinsic protein 1C	14.292	3;2;1	2;1;0	0	118350000	58722000	62138000	0	0	82539000	61647000	100470000
AT1G01710.1	Acyl-CoA thioesterase family protein	10.042	2	2	27976000	12007000	15360000	0	24177000	23227000	17379000	11680000	10513000
AT4G00680.1;AT1G01750.1	actin depolymerizing factor 8 ; actin depolymerizing factor 11	3.6612	1;1	1;1	0	0	0	0	0	0	0	0	50544000
AT1G01800.1;AT1G01800.2	NAD(P)-binding Rossmann-fold superfamily protein ; NAD(P)-binding Rossmann-fold superfamily protein	14.31	7;5;1;1	6;5;0;0	107320000	118520000	98559000	118750000	118640000	94260000	126500000	116300000	138590000
AT1G01910.4;AT1G01910.2;AT1G01910.1;AT1G01910.3	P-loop containing nucleoside triphosphate hydrolases superfamily protein ; P-loop containing nucleoside triphosphate hydrolases superfamily protein ; P-loop containing nucleoside triphosphate hydrolases superfamily protein ; P-loop containing nucleoside t	16.925	3;3;3;2;1	3;3;3;2;1	86799000	74486000	91851000	78701000	74909000	68157000	68181000	0	76955000
AT1G01940.1	Cyclophilin-like peptidyl-prolyl cis-trans isomerase family protein	18.738	2	2	0	0	0	0	0	0	51560000	59779000	35315000
AT1G01960.1	SEC7-like guanine nucleotide exchange family protein	62.028	7	6	90097000	97676000	111910000	101350000	103050000	102800000	101740000	99908000	52023000
AT1G01980.1	FAD-binding Berberine family protein	2.162	1	1	0	0	0	0	0	0	0	0	0
AT1G02080.2;AT1G02080.1	transcription regulators ; transcription regulators	11.933	8;8	8;8	0	65018000	113070000	95890000	80468000	127440000	83338000	83113000	68680000
AT1G02090.2;AT1G02090.3;AT1G02090.1	Proteasome component (PCI) domain protein ; Proteasome component (PCI) domain protein ; Proteasome component (PCI) domain protein	3.6484	3;3;3	3;3;3	0	0	0	0	0	0	0	18157000	0
AT1G02100.2;AT1G02100.3;AT1G02100.1	Leucine carboxyl methyltransferase ; Leucine carboxyl methyltransferase ; Leucine carboxyl methyltransferase	3.0722	2;2;2	2;2;2	0	0	0	0	27146000	0	0	0	0
AT1G02140.1	mago nashi family protein	23.778	4	4	102820000	136290000	109110000	116490000	112920000	111690000	102000000	96431000	100120000
AT1G02305.1	Cysteine proteinases superfamily protein	48.793	8;2	8;2	126450000	134500000	91534000	109910000	153780000	79516000	119630000	120180000	174570000
AT1G02335.1	germin-like protein subfamily 2 member 2 precursor	4.7889	4	2	0	0	26323000	14272000	15457000	0	14210000	0	0
AT1G02360.1	Chitinase family protein	10.359	3	3	58156000	63988000	36818000	0	0	48016000	0	36174000	61119000
AT1G02500.2;AT1G02500.1	S-adenosylmethionine synthetase 1 ; S-adenosylmethionine synthetase 1	323.31	17;17	7;7	7659500000	7468400000	8433900000	8170200000	7891200000	8322600000	7479200000	7321600000	7903100000
AT1G02530.1	P-glycoprotein 12	5.5094	4	1	0	0	0	0	0	0	0	0	9508600
AT1G02560.1	nuclear encoded CLP protease 5	10.089	3	3	56828000	43190000	66513000	42980000	56495000	50074000	44968000	41316000	38829000
AT1G02640.1	beta-xylosidase 2	1.8624	1	1	0	0	0	0	0	0	0	0	8974500
AT1G02690.1;AT1G02690.2	importin alpha isoform 6 ; importin alpha isoform 6	10.209	3;3	2;2	58444000	69982000	0	80216000	95943000	134900000	0	87788000	0
AT1G02780.1	Ribosomal protein L19e family protein	27.353	4;1	4;1	293300000	203770000	226930000	272340000	294190000	264810000	216700000	214720000	326480000
AT1G02840.2;AT1G02840.3;AT1G02840.1	RNA-binding (RRM/RBD/RNP motifs) family protein ; RNA-binding (RRM/RBD/RNP motifs) family protein ; RNA-binding (RRM/RBD/RNP motifs) family protein	12.451	4;4;4	4;4;4	120490000	99253000	117690000	104840000	93388000	107260000	98385000	102690000	98365000
AT1G02880.2;AT1G02880.3;AT1G02880.4;AT1G02880.1;AT2G44750.1;AT2G44750.2	thiamin pyrophosphokinase1 ; thiamin pyrophosphokinase1 ; thiamin pyrophosphokinase1 ; thiamin pyrophosphokinase1 ; thiamin pyrophosphokinase 2 ; thiamin pyrophosphokinase 2	11.631	4;4;2;2;2;2	4;4;2;2;2;2	70155000	0	0	68020000	0	0	63516000	61800000	54236000
AT1G02920.1	glutathione S-transferase 7	304.57	11	6	1093200000	899260000	1000400000	852430000	973440000	719730000	1022600000	879720000	850190000
AT1G02930.2;AT1G02930.1	glutathione S-transferase 6 ; glutathione S-transferase 6	136.96	9;9	4;4	422620000	298990000	525420000	374400000	320470000	346540000	482740000	372180000	289980000
AT1G43140.1;AT1G02980.1	Cullin family protein ; cullin 2	1.8028	1;1	1;1	0	0	0	0	0	0	0	0	24568000
AT1G03060.1;AT4G02660.1	Beige/BEACH domain ;WD domain, G-beta repeat protein ; Beige/BEACH domain ;WD domain, G-beta repeat protein	5.856	2;1	2;1	0	0	39751000	0	0	0	0	0	0
AT1G03090.1;AT1G03090.2	methylcrotonyl-CoA carboxylase alpha chain, mitochondrial / 3-methylcrotonyl-CoA carboxylase 1 (MCCA) ; methylcrotonyl-CoA carboxylase alpha chain, mitochondrial / 3-methylcrotonyl-CoA carboxylase 1 (MCCA)	2.5519	3;3	3;3	0	0	53345000	0	0	0	0	0	0
AT1G03110.1	Transducin/WD40 repeat-like superfamily protein	4.068	2	2	0	0	0	0	0	0	0	0	11352000
AT1G03150.1	Acyl-CoA N-acyltransferases (NAT) superfamily protein	1.21	1	1	0	0	0	0	0	0	0	0	5477100
AT1G03220.1	Eukaryotic aspartyl protease family protein	323.31	20	16	8687900000	8636300000	8528600000	8472100000	7342600000	7059300000	7999900000	8426900000	6528300000
AT1G03230.1	Eukaryotic aspartyl protease family protein	296.12	18	14	1464300000	1449400000	1458900000	1378600000	1276500000	1250000000	1221800000	1312400000	1183700000
AT1G03330.1	Small nuclear ribonucleoprotein family protein	2.2946	3	3	30871000	0	0	0	0	30586000	31493000	0	0
AT1G03350.1	BSD domain-containing protein	34.49	3	3	36159000	0	62257000	30804000	43898000	47256000	94639000	59566000	0
AT1G03360.1	ribosomal RNA processing 4	2.4324	1	1	0	14229000	0	17338000	13353000	14909000	15217000	14394000	15297000
AT1G03475.1	Coproporphyrinogen III oxidase	5.3127	2	2	0	0	0	0	0	0	0	0	15634000
AT1G03860.3;AT1G03860.1;AT1G03860.2	prohibitin 2 ; prohibitin 2 ; prohibitin 2	163.81	9;9;7	6;6;4	415280000	330880000	247160000	301740000	356930000	299150000	319510000	417800000	466080000
AT1G03870.1	FASCICLIN-like arabinoogalactan 9	87.869	5	4	264800000	311990000	360960000	372600000	227460000	232240000	271760000	249880000	248600000
AT1G04040.1	HAD superfamily, subfamily IIIB acid phosphatase	1.7152	4	3	0	0	0	0	14802000	0	9963800	0	11633000
AT1G04080.2;AT1G04080.1;AT1G04080.3	Tetratricopeptide repeat (TPR)-like superfamily protein ; Tetratricopeptide repeat (TPR)-like superfamily protein ; Tetratricopeptide repeat (TPR)-like superfamily protein	48.186	6;6;6	6;6;6	121560000	129280000	270880000	220400000	143580000	167190000	189990000	264040000	135970000
AT1G04170.1	eukaryotic translation initiation factor 2 gamma subunit	106.91	10;3;3;1	10;3;3;1	552090000	534820000	563960000	637400000	641030000	598120000	606350000	713680000	625470000
AT1G04190.1	Tetratricopeptide repeat (TPR)-like superfamily protein	20.8	3	3	37443000	25948000	44563000	38347000	36820000	33264000	39102000	30981000	36074000
AT1G04270.2;AT5G09510.1;AT1G04270.1;AT5G09510.2;AT5G43640.1;AT5G09500.1	cytosolic ribosomal protein S15 ; Ribosomal protein S19 family protein ; cytosolic ribosomal protein S15 ; Ribosomal protein S19 family protein ; Ribosomal protein S19 family protein ; Ribosomal protein S19 family protein	179.67	4;4;4;3;3;3	4;4;4;3;3;3	756880000	694270000	864820000	735240000	888220000	883590000	664950000	661280000	588000000
AT1G04410.1	Lactate/malate dehydrogenase family protein	323.31	17;1	9;0	7061300000	5750700000	5907100000	5800200000	5721600000	6066800000	6351800000	6228500000	6620400000
AT1G04430.2;AT1G04430.1	S-adenosyl-L-methionine-dependent methyltransferases superfamily protein ; S-adenosyl-L-methionine-dependent methyltransferases superfamily protein	4.3278	3;3	2;2	0	0	69218000	64484000	0	0	0	45173000	35189000
AT3G04400.1;AT2G33370.1;AT1G04480.1	Ribosomal protein L14p/L23e family protein ; Ribosomal protein L14p/L23e family protein ; Ribosomal protein L14p/L23e family protein	11.24	8;8;8	1;1;1	0	0	0	0	0	0	77882000	0	0
AT1G04510.2;AT1G04510.1	MOS4-associated complex 3A ; MOS4-associated complex 3A	19.053	2;2	2;2	94129000	0	92947000	114830000	0	98945000	87865000	82114000	0
AT1G04690.1	potassium channel beta subunit 1	110.37	7	7	638480000	530030000	549710000	495360000	657450000	624090000	555960000	525690000	557820000
AT1G04710.1	peroxisomal 3-ketoacyl-CoA thiolase 4	2.5483	2	1	0	0	0	0	0	0	0	0	19634000
AT1G04750.2;AT1G04750.1;AT2G33120.1;AT2G33120.2	vesicle-associated membrane protein 721 ; vesicle-associated membrane protein 721 ; synaptobrevin-related protein 1 ; synaptobrevin-related protein 1	12.292	3;3;3;3;1	3;3;3;3;1	62754000	57093000	23192000	0	26467000	40989000	54862000	29957000	0
AT1G04810.1	26S proteasome regulatory complex, non-ATPase subcomplex, Rpn2/Psmd1 subunit	40.777	9	4	68565000	0	42894000	55047000	57757000	30266000	54419000	51704000	56068000
AT1G50010.1;AT1G04820.1	tubulin alpha-2 chain ; tubulin alpha-4 chain	323.31	22;22	3;3	5987100000	6168800000	8240500000	6527300000	6293100000	6224100000	5883000000	6631000000	6143900000
AT1G04850.1	ubiquitin-associated (UBA)/TS-N domain-containing protein	10.01	4	4	76150000	84248000	114010000	111730000	104610000	96161000	83850000	94643000	69651000
AT1G04870.1;AT1G04870.2	protein arginine methyltransferase 10 ; protein arginine methyltransferase 10	12.595	3;3	3;3	0	29707000	34845000	32474000	29382000	0	33464000	39884000	0
AT1G04900.1	Protein of unknown function (DUF185)	2.3501	1	1	0	0	0	0	0	0	0	0	8154300
AT1G04980.1	PDI-like 2-2	5.8792	3	3	44644000	47437000	37334000	0	43577000	40743000	0	0	0
AT1G05010.1	ethylene-forming enzyme	9.869	3	2	48175000	31308000	36844000	32891000	39009000	38677000	38503000	33112000	42859000
AT1G05150.1;AT2G32450.1	Calcium-binding tetratricopeptide family protein ; Calcium-binding tetratricopeptide family protein	7.4234	4;2	4;2	41495000	46406000	23362000	48436000	29871000	35936000	38054000	34989000	37824000
AT1G05180.3;AT1G05180.2;AT1G05180.1	NAD(P)-binding Rossmann-fold superfamily protein ; NAD(P)-binding Rossmann-fold superfamily protein ; NAD(P)-binding Rossmann-fold superfamily protein	3.3407	3;3;3;1;1	3;3;3;1;1	35959000	41205000	39897000	0	0	0	42698000	47848000	50688000
AT1G05250.1;AT1G05240.1	Peroxidase superfamily protein ; Peroxidase superfamily protein	14.361	6;6	5;5	64525000	53183000	39909000	46744000	28699000	37725000	34248000	30291000	55042000
AT1G05260.1	Peroxidase superfamily protein	223.91	12	11	1007200000	1182300000	864910000	1216400000	801580000	905970000	966520000	1019700000	1253300000
AT1G05270.1	TraB family protein	2.9408	1	1	0	0	0	0	0	0	0	0	12179000
AT1G05320.3;AT1G05320.2;AT1G05320.1	FUNCTIONS IN: molecular_function unknown; INVOLVED IN: biological_process unknown; LOCATED IN: cellular_component unknown; EXPRESSED IN: fruit, egg cell; CONTAINS InterPro DOMAIN/s: Prefoldin (InterPro:IPR009053); BEST Arabidopsis thaliana protein match i	6.3224	2;2;2	1;1;1	0	0	0	0	0	0	0	0	19953000
AT1G05350.1	NAD(P)-binding Rossmann-fold superfamily protein	8.0063	2	2	0	29515000	26116000	36570000	34392000	28180000	30786000	27187000	53528000
AT1G05500.1	Calcium-dependent lipid-binding (CaLB domain) family protein	12.91	7	7	95849000	74369000	102110000	115190000	122860000	134420000	86951000	78951000	66789000
AT1G05520.1	Sec23/Sec24 protein transport family protein	41.58	6	3	90991000	86334000	113000000	95800000	85394000	102910000	76557000	59479000	58624000
AT1G05620.2;AT1G05620.1	uridine-ribohydrolase 2 ; uridine-ribohydrolase 2	18.87	3;3	3;3	53856000	79384000	66747000	82462000	68469000	55166000	62947000	41776000	55470000
AT1G05680.1;AT1G05675.1	Uridine diphosphate glycosyltransferase 74E2 ; UDP-Glycosyltransferase superfamily protein	3.5349	2;1	2;1	13532000	13310000	11939000	14669000	0	12739000	17453000	14246000	14722000
AT1G05720.1	selenoprotein family protein	2.0677	1	1	0	0	0	0	0	0	0	79429000	0
AT1G06000.1	UDP-Glycosyltransferase superfamily protein	17.645	7	7	124240000	124020000	134490000	128620000	127940000	147620000	131370000	151110000	188520000
AT1G06130.2;AT1G06130.1	glyoxalase 2-4 ; glyoxalase 2-4	9.0711	3;3;1;1	3;3;1;1	0	0	78584000	50617000	52795000	0	0	113500000	54842000
AT1G06210.1;AT1G06210.2	ENTH/VHS/GAT family protein ; ENTH/VHS/GAT family protein	1.7355	2;1	2;1	0	0	0	0	0	0	0	0	17380000
AT1G06220.2;AT1G06220.1;AT5G25230.1	Ribosomal protein S5/Elongation factor G/III/V family protein ; Ribosomal protein S5/Elongation factor G/III/V family protein ; Ribosomal protein S5/Elongation factor G/III/V family protein	29.592	10;10;7	10;10;7	180990000	173080000	181740000	167360000	192250000	202580000	174580000	188850000	141020000
AT1G06230.3;AT1G06230.2;AT1G06230.1	global transcription factor group E4 ; global transcription factor group E4 ; global transcription factor group E4	1.8024	1;1;1	1;1;1	0	0	0	0	0	0	0	0	0
AT1G06290.1	acyl-CoA oxidase 3	67.943	11;2;1	11;2;1	269500000	195680000	172880000	168670000	204100000	224270000	203130000	199750000	208840000
AT1G06400.1	Ras-related small GTP-binding family protein	47.549	5;1	4;0	28672000	30694000	0	56697000	33302000	0	31277000	24608000	38961000
AT1G06410.1	trehalose-phosphatase/synthase 7	22.224	7	7	48740000	50085000	70869000	52830000	54020000	52276000	60483000	72318000	58801000
AT1G06530.1	Tropomyosin-related	13.633	3	3	0	0	0	0	0	0	59643000	0	0
AT1G06550.1	ATP-dependent caseinolytic (Clp) protease/crotonase family protein	49.415	6	6	282410000	209820000	259320000	214560000	214680000	224520000	216280000	202660000	189780000
AT1G06620.1	2-oxoglutarate (2OG) and Fe(II)-dependent oxygenase superfamily protein	15.082	2	2	0	0	22854000	26467000	23399000	24500000	17604000	26468000	32342000
AT1G06640.1;AT1G06640.3;AT1G06640.2	2-oxoglutarate (2OG) and Fe(II)-dependent oxygenase superfamily protein ; 2-oxoglutarate (2OG) and Fe(II)-dependent oxygenase superfamily protein ; 2-oxoglutarate (2OG) and Fe(II)-dependent oxygenase superfamily protein	7.5944	5;3;3;2;1;1;1	4;3;3;1;1;1;0	22921000	32017000	22198000	21314000	24932000	19263000	24996000	25650000	32255000
AT1G06680.2;AT1G06680.1	photosystem II subunit P-1 ; photosystem II subunit P-1	1.5487	1;1	1;1	0	0	0	0	0	0	0	0	5252400
AT1G06840.1	Leucine-rich repeat protein kinase family protein	2.6039	1	1	0	0	0	0	0	0	0	0	4677400
AT1G06900.1	Insulinase (Peptidase family M16) family protein	36.343	8	8	70267000	128380000	146850000	106710000	144110000	119920000	104170000	106850000	72596000
AT1G06950.1	translocon at the inner envelope membrane of chloroplasts 110	33.024	8	8	114060000	133460000	138310000	162100000	137060000	144940000	132030000	121920000	137210000
AT1G07000.1	exocyst subunit exo70 family protein B2	4.8223	1	1	0	0	0	0	0	0	0	2516800	0
AT1G07080.1	Thioredoxin superfamily protein	126.01	4	4	358660000	435780000	601690000	362850000	374320000	519350000	403760000	325380000	249140000
AT1G07140.1	Pleckstrin homology (PH) domain superfamily protein	141.53	7	4	425790000	482740000	268830000	370610000	454850000	377180000	534170000	313030000	537730000
AT1G07210.1	Ribosomal protein S18	1.3617	1	1	0	0	0	0	0	0	0	0	14126000
AT1G07240.1	UDP-glucosyl transferase 71C5	22.662	4	4	54557000	45193000	80791000	46821000	96988000	53839000	67096000	81511000	60048000
AT1G07250.1	UDP-glucosyl transferase 71C4	1.2675	2	2	0	0	0	0	0	0	0	0	4426900
AT1G07260.1	UDP-glucosyl transferase 71C3	2.907	1	1	0	0	0	0	0	0	2650800	0	0
AT1G07310.1	Calcium-dependent lipid-binding (CaLB domain) family protein	1.3921	1	1	0	0	0	0	0	0	0	0	13297000
AT1G07360.1;AT2G29580.1	CCCH-type zinc fingerfamily protein with RNA-binding domain ; CCCH-type zinc fingerfamily protein with RNA-binding domain	6.8887	2;1	2;1	35058000	43772000	0	40242000	35656000	38250000	45134000	44834000	54101000
AT1G07370.1;AT2G29570.1	proliferating cellular nuclear antigen 1 ; proliferating cell nuclear antigen 2	15.396	4;3	4;3	265690000	276110000	340140000	311510000	273320000	295090000	293610000	250590000	253260000
AT5G59970.1;AT5G59690.1;AT3G53730.1;AT3G46320.1;AT3G45930.1;AT2G28740.1;AT1G07820.2;AT1G07820.1;AT1G07660.1;AT1G07660.2	Histone superfamily protein ; Histone superfamily protein ; Histone superfamily protein ; Histone superfamily protein ; Histone superfamily protein ; histone H4 ; Histone superfamily protein ; Histone superfamily protein ; Histone superfamily protein ; Hi	26.712	8;8;8;8;8;8;8;8;8;7	8;8;8;8;8;8;8;8;8;7	2738500000	3058100000	2094200000	2706200000	2845700000	2514600000	2783700000	2215300000	3120700000
AT1G07670.1	endomembrane-type CA-ATPase 4	2.3348	6	2	0	0	0	0	0	0	0	7945800	0
AT1G07750.1	RmlC-like cupins superfamily protein	123.2	4;1	4;1	311940000	204720000	337270000	307870000	221980000	288710000	276470000	244080000	207350000
AT5G59850.1;AT1G07770.2;AT1G07770.1;AT3G46040.1	Ribosomal protein S8 family protein ; ribosomal protein S15A ; ribosomal protein S15A ; ribosomal protein S15A D	54.697	9;9;9;5;3	9;9;9;5;3	780100000	985180000	850020000	1029000000	888590000	989250000	813910000	1039200000	1206500000
AT5G05590.1;AT1G07780.5;AT1G07780.3;AT1G07780.2;AT1G07780.1;AT1G07780.4;AT5G05590.2	phosphoribosylanthranilate isomerase 2 ; phosphoribosylanthranilate isomerase 1 ; phosphoribosylanthranilate isomerase 1 ; phosphoribosylanthranilate isomerase 1 ; phosphoribosylanthranilate isomerase 1 ; phosphoribosylanthranilate isomerase 1 ; phosphori	13.179	3;3;3;3;3;2;2;1;1	3;3;3;3;3;2;2;1;1	34257000	36803000	51924000	49357000	30198000	41910000	50981000	56707000	69411000
AT5G22880.1;AT3G46030.1;AT1G07790.1;AT5G59910.1;AT3G45980.1;AT2G28720.1;AT5G02570.1;AT2G37470.1	histone B2 ; Histone superfamily protein ; Histone superfamily protein ; Histone superfamily protein ; Histone superfamily protein ; Histone superfamily protein ; Histone superfamily protein ; Histone superfamily protein	16.591	3;3;3;3;3;3;2;2;1;1	3;3;3;3;3;3;2;2;1;1	457120000	487960000	244630000	416170000	513890000	319650000	424690000	294660000	381290000
AT1G07810.1	ER-type Ca2+-ATPase 1	47.817	6;1	2;0	174980000	155620000	129200000	164990000	170990000	174020000	139240000	162510000	142640000
AT1G07890.8;AT1G07890.7;AT1G07890.5;AT1G07890.4;AT1G07890.3;AT1G07890.2;AT1G07890.1;AT1G07890.6	ascorbate peroxidase 1 ; ascorbate peroxidase 1 ; ascorbate peroxidase 1 ; ascorbate peroxidase 1 ; ascorbate peroxidase 1 ; ascorbate peroxidase 1 ; ascorbate peroxidase 1 ; ascorbate peroxidase 1	323.31	16;16;16;16;16;16;16;15	14;14;14;14;14;14;14;13	13113000000	11145000000	11114000000	10941000000	10808000000	10433000000	11464000000	11465000000	14678000000
AT5G60390.3;AT5G60390.1;AT1G07940.2;AT1G07940.1;AT1G07930.1;AT1G07920.1;AT5G60390.2;AT1G07930.2	GTP binding Elongation factor Tu family protein ; GTP binding Elongation factor Tu family protein ; GTP binding Elongation factor Tu family protein ; GTP binding Elongation factor Tu family protein ; GTP binding Elongation factor Tu family protein ; GTP b	323.31	23;23;23;23;23;23;20;19;1	23;23;23;23;23;23;20;19;1	15025000000	15154000000	16188000000	15482000000	15740000000	15890000000	13824000000	13787000000	14239000000
AT1G07960.3;AT1G07960.2;AT1G07960.1	PDI-like 5-1 ; PDI-like 5-1 ; PDI-like 5-1	2.1588	1;1;1	1;1;1	0	0	0	0	0	0	0	0	27729000
AT1G07990.1	SIT4 phosphatase-associated family protein	3.4908	2	1	0	0	0	0	0	0	0	3621900	0
AT1G08110.3;AT1G08110.2;AT1G08110.1;AT1G08110.4	lactoylglutathione lyase family protein / glyoxalase I family protein ; lactoylglutathione lyase family protein / glyoxalase I family protein ; lactoylglutathione lyase family protein / glyoxalase I family protein ; lactoylglutathione lyase family protein	19.244	5;5;5;5	5;5;5;5	108610000	109780000	149720000	121480000	119630000	100430000	126670000	120080000	150100000
AT1G08190.1	vacuolar protein sorting 41	2.0145	2	2	0	0	0	0	0	0	0	0	9011100
AT1G08200.1	UDP-D-apiose/UDP-D-xylose synthase 2	229.59	19	8	1561900000	1809700000	1790100000	1722900000	1651800000	1681300000	1597900000	1763000000	2031300000
AT1G08360.1	Ribosomal protein L1p/L10e family	134.34	7	3	852900000	742980000	663420000	800670000	851030000	783770000	763910000	946670000	999370000
AT1G08370.1	decapping 1	38.565	1	1	0	13591000	16369000	0	13018000	7393600	0	9445600	8063600
AT1G08420.2;AT1G08420.1	BRI1 suppressor 1 (BSU1)-like 2 ; BRI1 suppressor 1 (BSU1)-like 2	19.546	5;5	1;1	37515000	46030000	52838000	0	46527000	0	43690000	53826000	51465000
AT1G08450.3;AT1G08450.1;AT1G08450.2	calreticulin 3 ; calreticulin 3 ; calreticulin 3	15.245	3;3;2	3;3;2	74224000	72022000	56746000	70884000	69447000	68480000	66011000	80913000	88446000
AT1G08480.1	unknown protein; FUNCTIONS IN: molecular_function unknown; INVOLVED IN: biological_process unknown; LOCATED IN: mitochondrion, plasma membrane, plastid, vacuole; EXPRESSED IN: 27 plant structures; EXPRESSED DURING: 15 growth stages; Has 39 Blast hits to 3	50.645	5	5	127560000	176650000	199120000	153900000	206760000	235790000	148040000	194210000	199580000
AT1G08780.1	ABI3-interacting protein 3	1.3402	1	1	0	0	0	0	0	0	7615000	0	0
AT1G08820.2;AT1G08820.1	vamp/synaptobrevin-associated protein 27-2 ; vamp/synaptobrevin-associated protein 27-2	2.1676	1;1	1;1	0	0	0	0	0	0	0	0	15903000
AT1G08830.2;AT1G08830.1;AT5G18100.2;AT5G18100.1	copper/zinc superoxide dismutase 1 ; copper/zinc superoxide dismutase 1 ; copper/zinc superoxide dismutase 3 ; copper/zinc superoxide dismutase 3	3.1918	2;2;1;1	2;2;1;1	0	0	0	0	0	0	0	0	24084000
AT1G08940.1	Phosphoglycerate mutase family protein	4.2409	1	1	0	0	0	0	0	0	0	0	5876300
AT1G09010.1	glycoside hydrolase family 2 protein	9.8178	5	5	89367000	90913000	100550000	90137000	75124000	79610000	94895000	97261000	105330000
AT1G09020.1	homolog of yeast sucrose nonfermenting 4	6.4085	5	5	66551000	83098000	82567000	91261000	77823000	66498000	101520000	71841000	59482000
AT1G09050.1;AT1G09040.1	unknown protein; BEST Arabidopsis thaliana protein match is: unknown protein (TAIR:AT1G09040.1); Has 552 Blast hits to 499 proteins in 115 species: Archae - 0; Bacteria - 86; Metazoa - 259; Fungi - 14; Plants - 77; Viruses - 0; Other Eukaryotes - 116 (sou	1.492	2;1	2;1	0	0	0	0	0	0	0	108130000	0
AT1G09130.2;AT1G09130.1;AT1G09130.3	ATP-dependent caseinolytic (Clp) protease/crotonase family protein ; ATP-dependent caseinolytic (Clp) protease/crotonase family protein ; ATP-dependent caseinolytic (Clp) protease/crotonase family protein	2.0576	1;1;1	1;1;1	0	0	0	0	0	0	0	0	7555800
AT1G09150.1	pseudouridine synthase and archaeosine transglycosylase (PUA) domain-containing protein	56.598	2	2	0	0	0	0	78193000	99133000	88618000	0	0
AT5G65360.1;AT5G10400.1;AT5G10390.1;AT3G27360.1;AT1G09200.1;AT5G65350.1	Histone superfamily protein ; Histone superfamily protein ; Histone superfamily protein ; Histone superfamily protein ; Histone superfamily protein ; histone 3 11	201.48	4;4;4;4;4;2	1;1;1;1;1;1	287130000	485110000	218050000	274220000	453590000	520000000	355540000	487630000	264980000
AT1G09210.1	calreticulin 1b	323.31	18	11	4325100000	3633700000	4337600000	3585800000	3861400000	3875400000	3540200000	3311700000	3327300000
AT1G09270.2;AT1G09270.1;AT1G09270.3	importin alpha isoform 4 ; importin alpha isoform 4 ; importin alpha isoform 4	214.38	10;10;9	9;9;8	309810000	354470000	409370000	422040000	314930000	390200000	301410000	350630000	280280000
AT1G09430.1	ATP-citrate lyase A-3	95.214	11	9	346460000	349840000	382430000	301820000	299270000	351380000	390210000	312200000	352210000
AT1G09560.1	germin-like protein 5	71.762	4	2	1011500000	900520000	672180000	754820000	853040000	716120000	835820000	833070000	812210000
AT1G57860.1;AT1G57660.1;AT1G09690.1;AT1G09590.1	Translation protein SH3-like family protein ; Translation protein SH3-like family protein ; Translation protein SH3-like family protein ; Translation protein SH3-like family protein	33.748	4;4;4;4	4;4;4;4	245320000	220990000	239810000	175150000	304740000	262090000	291520000	238590000	195240000
AT1G09620.1	ATP binding;leucine-tRNA ligases;aminoacyl-tRNA ligases;nucleotide binding;ATP binding;aminoacyl-tRNA ligases	125.41	22	22	470250000	602550000	664360000	638100000	585290000	638440000	521420000	539020000	506060000
AT1G09630.1	RAB GTPase 11C	6.3011	7	3	0	25647000	0	0	18350000	0	18691000	14825000	39695000
AT1G09640.1;AT1G09640.2	Translation elongation factor EF1B, gamma chain ; Translation elongation factor EF1B, gamma chain	194.56	14;10	6;6	464490000	456990000	389630000	433410000	476830000	357200000	430870000	445130000	499100000
AT1G09740.1	Adenine nucleotide alpha hydrolases-like superfamily protein	81.192	3	3	685900000	545370000	570670000	514270000	582390000	603770000	661930000	537950000	526460000
AT1G09760.1	U2 small nuclear ribonucleoprotein A	22.26	4	4	66161000	0	93493000	58623000	0	56361000	44736000	48495000	46872000
AT1G09780.1	Phosphoglycerate mutase, 2,3-bisphosphoglycerate-independent	323.31	22	16	5292000000	4323700000	4773000000	4387200000	4370000000	4546700000	4417000000	4117500000	4295500000
AT1G09795.1	ATP phosphoribosyl transferase 2	9.5367	1	1	0	0	0	0	0	0	0	0	8184800
AT1G09830.1	Glycinamide ribonucleotide (GAR) synthetase	5.8737	3	3	0	22552000	0	26896000	25282000	0	22171000	24033000	19220000
AT1G09850.1	xylem bark cysteine peptidase 3	6.9616	3	3	0	77066000	70133000	72098000	70284000	74644000	66448000	0	66744000
AT1G09870.1	histidine acid phosphatase family protein	27.727	3	3	69377000	59194000	67414000	62918000	69116000	60660000	52737000	64961000	56332000
AT1G10140.1	Uncharacterised conserved protein UCP031279	4.7629	1	1	0	0	0	0	0	0	0	0	2850400
AT1G10290.1	dynamin-like protein 6	60.989	17	4	425000000	394350000	492310000	455990000	418860000	424240000	396180000	360610000	350900000
AT1G10370.1	Glutathione S-transferase family protein	3.5299	2	2	0	0	0	0	0	0	0	0	40380000
AT1G10390.2;AT1G10390.1	Nucleoporin autopeptidase ; Nucleoporin autopeptidase	14.273	3;3	3;3	0	0	0	0	0	0	0	0	37845000
AT1G59830.1;AT1G10430.1;AT1G59830.2;AT1G69960.1	protein phosphatase 2A-2 ; protein phosphatase 2A-2 ; protein phosphatase 2A-2 ; serine/threonine protein phosphatase 2A	7.0235	3;3;2;2	2;2;1;1	0	65345000	63638000	67540000	61261000	57531000	63625000	64073000	69421000
AT3G57940.2;AT3G57940.1;AT1G10490.1	Domain of unknown function (DUF1726) ;Putative ATPase (DUF699) ; Domain of unknown function (DUF1726) ;Putative ATPase (DUF699) ; Domain of unknown function (DUF1726) ;Putative ATPase (DUF699)	4.1627	2;2;2	2;2;2	0	0	0	0	13093000	0	0	9312500	0
AT1G10510.1	RNI-like superfamily protein	6.0435	1	1	0	0	0	0	0	15850000	0	0	0
AT1G10580.1	Transducin/WD40 repeat-like superfamily protein	2.8686	1	1	0	0	0	0	0	0	0	0	7591200
AT1G10590.2;AT1G10590.1;AT1G10590.3	Nucleic acid-binding, OB-fold-like protein ; Nucleic acid-binding, OB-fold-like protein ; Nucleic acid-binding, OB-fold-like protein	9.741	2;2;1	2;2;1	0	0	0	0	0	0	0	0	109440000
AT2G47170.1;AT1G10630.1;AT5G14670.1	Ras-related small GTP-binding family protein ; ADP-ribosylation factor A1F ; ADP-ribosylation factor A1B	84.185	10;10;9	1;1;0	0	0	0	0	0	0	75374000	0	0
AT1G10670.4;AT1G10670.2;AT1G10670.1;AT1G10670.3	ATP-citrate lyase A-1 ; ATP-citrate lyase A-1 ; ATP-citrate lyase A-1 ; ATP-citrate lyase A-1	165.9	10;10;10;9	6;6;6;5	368030000	427280000	531150000	434410000	447940000	541440000	359580000	451560000	455990000
AT1G10700.1	phosphoribosyl pyrophosphate (PRPP) synthase 3	2.6844	1	1	0	0	0	0	0	0	0	6640700	0
AT1G10760.1	Pyruvate phosphate dikinase, PEP/pyruvate binding domain	5.548	2	2	0	14454000	0	16642000	14558000	0	0	0	0
AT1G10840.1;AT1G10840.2	translation initiation factor 3 subunit H1 ; translation initiation factor 3 subunit H1	37.385	8;6	8;6	175790000	211270000	217130000	212410000	188970000	184800000	197550000	200210000	196880000
AT1G60940.2;AT1G60940.1;AT1G10940.1;AT1G10940.2;AT5G63650.1	SNF1-related protein kinase 2.10 ; SNF1-related protein kinase 2.10 ; Protein kinase superfamily protein ; Protein kinase superfamily protein ; SNF1-related protein kinase 2.5	1.1531	2;2;2;2;1	1;1;1;1;0	0	0	0	0	0	0	0	0	11293000
AT1G10950.1	transmembrane nine 1	70.147	4	4	73176000	64965000	98315000	59944000	68405000	90565000	78840000	83610000	78851000
AT1G10960.1	ferredoxin 1	13.601	2	2	61401000	0	0	0	0	0	0	0	0
AT1G11360.4;AT1G11360.3;AT1G11360.2;AT1G11360.1	Adenine nucleotide alpha hydrolases-like superfamily protein ; Adenine nucleotide alpha hydrolases-like superfamily protein ; Adenine nucleotide alpha hydrolases-like superfamily protein ; Adenine nucleotide alpha hydrolases-like superfamily protein	6.7092	3;3;3;3	3;3;3;3	0	90008000	0	0	0	92487000	126840000	0	84236000
AT1G11430.1	plastid developmental protein DAG, putative	6.7598	2	2	0	30227000	34925000	37801000	32728000	56885000	34734000	0	33158000
AT1G11580.1	methylesterase PCR A	103.25	11	11	1011000000	901320000	642890000	808500000	861490000	651100000	1054400000	820740000	1180900000
AT1G11650.1;AT1G11650.2	RNA-binding (RRM/RBD/RNP motifs) family protein ; RNA-binding (RRM/RBD/RNP motifs) family protein	17.063	4;4	4;4	81923000	119990000	71134000	98838000	100920000	116680000	108050000	102100000	118480000
AT1G11660.1	heat shock protein 70 (Hsp 70) family protein	24.122	7	7	125660000	123880000	139290000	115380000	114880000	118690000	120050000	96415000	92954000
AT1G11680.1	CYTOCHROME P450 51G1	5.8419	4	4	0	0	42298000	25386000	0	0	35031000	47284000	35599000
AT1G11790.2;AT3G07630.2;AT3G07630.1;AT1G11790.1	arogenate dehydratase 1 ; arogenate dehydratase 2 ; arogenate dehydratase 2 ; arogenate dehydratase 1	8.7045	1;1;1;1	1;1;1;1	0	0	0	0	0	0	0	0	12103000
AT1G11820.1;AT1G11820.2	O-Glycosyl hydrolases family 17 protein ; O-Glycosyl hydrolases family 17 protein	1.5185	1;1	1;1	0	0	0	0	0	0	0	2955900	0
AT1G11840.4;AT1G11840.3;AT1G11840.2;AT1G11840.1;AT1G11840.6;AT1G11840.5	glyoxalase I homolog ; glyoxalase I homolog ; glyoxalase I homolog ; glyoxalase I homolog ; glyoxalase I homolog ; glyoxalase I homolog	170.1	8;8;8;8;7;5	7;7;7;7;6;5	1685100000	1292400000	1844900000	1345800000	1422600000	1370000000	1579000000	1720700000	1519500000
AT1G11860.3;AT1G11860.2;AT1G11860.1	Glycine cleavage T-protein family ; Glycine cleavage T-protein family ; Glycine cleavage T-protein family	88.997	12;12;12	12;12;12	720600000	589770000	623300000	756620000	545310000	681630000	763280000	823710000	873750000
AT1G11890.1	Synaptobrevin family protein	3.194	1	1	0	0	0	0	0	0	0	0	41939000
AT1G11905.2;AT1G11905.1	B-cell receptor-associated protein 31-like ; B-cell receptor-associated protein 31-like	3.1469	1;1	1;1	0	0	0	0	0	0	0	0	4253300
AT1G11910.1	aspartic proteinase A1	323.31	16;2;2	16;2;2	2747900000	2559700000	3262900000	2816500000	2597700000	2800600000	2108100000	2769000000	2369400000
AT1G11930.2;AT1G11930.1	Predicted pyridoxal phosphate-dependent enzyme, YBL036C type ; Predicted pyridoxal phosphate-dependent enzyme, YBL036C type	33.614	4;4	4;4	97848000	79482000	105500000	72521000	69976000	90590000	87821000	89214000	85360000
AT1G12000.1	Phosphofructokinase family protein	216.86	17	14	1188200000	1118300000	1594200000	1363100000	1214400000	1173400000	1325000000	1150700000	1197000000
AT1G12010.1	2-oxoglutarate (2OG) and Fe(II)-dependent oxygenase superfamily protein	97.594	2	1	127440000	140930000	206900000	0	118930000	167950000	134450000	115240000	112130000
AT1G12050.1	fumarylacetoacetase, putative	77.901	8	8	164720000	188220000	241690000	194640000	218130000	216910000	203490000	182950000	149140000
AT1G12080.2;AT1G12080.1	Vacuolar calcium-binding protein-related ; Vacuolar calcium-binding protein-related	215.29	6;4	5;3	482110000	466020000	509290000	372600000	391210000	540970000	273770000	252360000	269600000
AT1G12110.1	nitrate transporter 1.1	40.315	4	4	85592000	94557000	46044000	93378000	119210000	118470000	86449000	94774000	84932000
AT1G12140.2;AT1G12140.1	flavin-monooxygenase glucosinolate S-oxygenase 5 ; flavin-monooxygenase glucosinolate S-oxygenase 5	3.053	3;3	3;3	0	0	0	0	0	0	0	27599000	38570000
AT1G12210.1	RPS5-like 1	2.0305	1	1	0	0	0	0	0	0	0	0	31531000
AT1G12230.1;AT1G12230.2	Aldolase superfamily protein ; Aldolase superfamily protein	4.5979	6;6	6;6	85402000	125670000	64892000	83761000	76049000	79117000	141330000	80698000	200710000
AT1G12240.1	Glycosyl hydrolases family 32 protein	152.78	14	11	336980000	303030000	354400000	350160000	293470000	304230000	244300000	304330000	314560000
AT1G12270.1	stress-inducible protein, putative	35.634	11	11	252050000	353510000	430740000	327410000	368990000	502950000	344620000	387600000	264190000
AT1G12310.1	Calcium-binding EF-hand family protein	59.252	10	4	556460000	508820000	505900000	547690000	511970000	535030000	533940000	483890000	477600000
AT1G12350.1	4-phospho-panto-thenoylcysteine synthetase	27.491	2	2	0	12723000	13119000	16813000	14923000	0	17073000	17672000	0
AT1G12360.1	Sec1/munc18-like (SM) proteins superfamily	8.6078	7	7	54125000	64075000	67295000	62865000	57853000	69861000	53875000	62267000	54632000
AT1G12410.1	CLP protease proteolytic subunit 2	8.583	1	1	0	0	0	0	0	0	0	0	25768000
AT1G12470.1	zinc ion binding	6.9439	3	3	0	0	0	0	0	0	15056000	0	0
AT1G12520.2;AT1G12520.1;AT1G12520.3	copper chaperone for SOD1 ; copper chaperone for SOD1 ; copper chaperone for SOD1	5.5102	2;2;1	2;2;1	0	0	0	0	0	0	0	29171000	0
AT1G12780.1	UDP-D-glucose/UDP-D-galactose 4-epimerase 1	18.755	5;2;1	4;1;0	130060000	125690000	126450000	120670000	86706000	110690000	130080000	112660000	98993000
AT1G12820.1	auxin signaling F-box 3	1.4503	1	1	0	0	0	0	0	0	0	0	667760
AT1G12840.1	vacuolar ATP synthase subunit C (VATC) / V-ATPase C subunit / vacuolar proton pump C subunit (DET3)	277.15	17	17	1101900000	995660000	786740000	949090000	996720000	939430000	863600000	970880000	1233100000
AT1G12910.1	Transducin/WD40 repeat-like superfamily protein	2.1477	1	1	0	0	0	0	0	0	0	3995200	0
AT1G12920.1	eukaryotic release factor 1-2	115.29	8	3	206180000	220850000	319770000	467680000	235290000	171370000	266810000	337260000	334440000
AT1G13060.1;AT1G13060.2	20S proteasome beta subunit E1 ; 20S proteasome beta subunit E1	270.03	10;9	5;5	703870000	698180000	729530000	789920000	704560000	745040000	629620000	646190000	652900000
AT1G13080.1;AT1G13080.2	cytochrome P450, family 71, subfamily B, polypeptide 2 ; cytochrome P450, family 71, subfamily B, polypeptide 2	7.1845	3;2	3;2	25242000	29220000	20499000	32173000	33417000	28818000	0	33094000	27373000
AT1G13180.1	Actin-like ATPase superfamily protein	1.5422	1	1	0	0	0	0	0	0	0	0	3127500
AT1G13280.1	allene oxide cyclase 4	36.18	4;1;1	3;0;0	170520000	211790000	275340000	230320000	221750000	181190000	207610000	221240000	193080000
AT1G13320.3;AT1G13320.1;AT1G13320.2	protein phosphatase 2A subunit A3 ; protein phosphatase 2A subunit A3 ; protein phosphatase 2A subunit A3	31.349	16;16;15	11;11;10	72801000	96430000	87152000	74337000	82996000	75327000	75624000	97894000	90500000
AT1G13420.1	sulfotransferase 4B	24.306	8;2;1	8;2;1	234720000	275110000	273970000	299850000	276410000	250050000	272310000	316920000	295370000
AT1G13440.1;AT1G13440.2	glyceraldehyde-3-phosphate dehydrogenase C2 ; glyceraldehyde-3-phosphate dehydrogenase C2	323.31	27;22	3;3	26516000000	28217000000	32654000000	29415000000	29316000000	31245000000	28415000000	26581000000	24867000000
AT1G13560.1;AT3G25585.4;AT3G25585.2;AT3G25585.1	aminoalcoholphosphotransferase 1 ; aminoalcoholphosphotransferase ; aminoalcoholphosphotransferase ; aminoalcoholphosphotransferase	3.5561	2;1;1;1	2;1;1;1	23284000	27507000	19579000	0	39977000	0	27570000	21585000	31161000
AT1G13690.1	ATPase E1	27.145	3	3	38541000	0	61899000	51043000	56434000	48847000	40318000	49594000	39380000
AT1G13730.1	Nuclear transport factor 2 (NTF2) family protein with RNA binding (RRM-RBD-RNP motifs) domain	11.244	3	3	26616000	31917000	0	38636000	25794000	32170000	29815000	23625000	24089000
AT1G13750.1	Purple acid phosphatases superfamily protein	11.106	4	4	37244000	60117000	32859000	36622000	19609000	50439000	52017000	34587000	44141000
AT1G13900.1	Purple acid phosphatases superfamily protein	1.8728	1	1	0	0	0	0	0	0	0	0	8628200
AT1G13930.3;AT1G13930.2;AT1G13930.1	Involved in response to salt stress. Knockout mutants are hypersensitive to salt stress. ; Involved in response to salt stress. Knockout mutants are hypersensitive to salt stress. ; Involved in response to salt stress. Knockout mutants are hypersensiti	94.367	7;7;7	7;7;7	170270000	293400000	305310000	429250000	353210000	287610000	690370000	415830000	310580000
AT1G13950.1	eukaryotic elongation factor 5A-1	2.272	3	1	0	0	0	0	0	0	0	0	0
AT1G13980.2;AT1G13980.1	sec7 domain-containing protein ; sec7 domain-containing protein	2.5075	1;1	1;1	0	0	0	0	0	0	0	5612200	0
AT1G14000.1	VH1-interacting kinase	28.381	7	7	181500000	164230000	238990000	205250000	212410000	173470000	179980000	218130000	194000000
AT1G14210.1	Ribonuclease T2 family protein	8.1877	2	2	95002000	0	87092000	0	67002000	0	92590000	102330000	83129000
AT1G14240.3;AT1G14240.4;AT1G14240.2;AT1G14240.1	GDA1/CD39 nucleoside phosphatase family protein ; GDA1/CD39 nucleoside phosphatase family protein ; GDA1/CD39 nucleoside phosphatase family protein ; GDA1/CD39 nucleoside phosphatase family protein	3.5371	1;1;1;1	1;1;1;1	0	0	0	0	0	0	0	0	22033000
AT1G14320.1;AT1G14320.2	Ribosomal protein L16p/L10e family protein ; Ribosomal protein L16p/L10e family protein	36.741	7;4	2;2	1375400000	1459600000	1766300000	1646600000	1647800000	1586300000	1432200000	1286900000	1242400000
AT2G02760.1;AT1G14400.2;AT1G14400.1	ubiquiting-conjugating enzyme 2 ; ubiquitin carrier protein 1 ; ubiquitin carrier protein 1	29.163	2;2;2	2;2;2	120670000	121580000	147080000	94623000	99309000	0	130980000	0	151930000
AT1G14510.1	alfin-like 7	8.1911	1	1	0	0	0	0	0	0	0	0	2820700
AT1G14570.4;AT1G14570.3;AT1G14570.2;AT1G14570.1	UBX domain-containing protein ; UBX domain-containing protein ; UBX domain-containing protein ; UBX domain-containing protein	1.4235	1;1;1;1	1;1;1;1	0	0	0	0	0	0	0	0	9330100
AT1G14610.1	valyl-tRNA synthetase / valine--tRNA ligase (VALRS)	210.17	20	20	406140000	339610000	432840000	399240000	423040000	367570000	380940000	358720000	357040000
AT1G14620.1;AT1G14620.2	decoy ; decoy	5.2686	3;2	3;2	49048000	48033000	90809000	65788000	60231000	60856000	60035000	62854000	60325000
AT1G14650.2;AT1G14650.1	SWAP (Suppressor-of-White-APricot)/surp domain-containing protein / ubiquitin family protein ; SWAP (Suppressor-of-White-APricot)/surp domain-containing protein / ubiquitin family protein	6.891	5;5	5;5	32350000	35181000	34166000	39482000	34730000	32730000	44716000	42845000	45940000
AT1G14670.1	Endomembrane protein 70 protein family	6.2802	4	1	81804000	97366000	89244000	100440000	95966000	95761000	97780000	106950000	112430000
AT1G14710.2;AT1G14710.1	hydroxyproline-rich glycoprotein family protein ; hydroxyproline-rich glycoprotein family protein	2.3838	1;1	1;1	7078900	9113200	0	0	0	0	7328700	0	0
AT1G14810.1	semialdehyde dehydrogenase family protein	223.04	10	10	428430000	458240000	519790000	532850000	356490000	520370000	464580000	463400000	412550000
AT1G14820.2;AT1G14820.1;AT1G14820.3	Sec14p-like phosphatidylinositol transfer family protein ; Sec14p-like phosphatidylinositol transfer family protein ; Sec14p-like phosphatidylinositol transfer family protein	1.8133	1;1;1	1;1;1	0	0	0	0	0	0	0	0	2516500
AT1G14830.1	DYNAMIN-like 1C	18.351	9	7	271620000	274750000	196360000	274680000	211990000	228660000	217820000	257500000	241550000
AT1G14850.1	nucleoporin 155	1.6404	2	2	0	0	0	0	0	0	0	15870000	0
AT1G14870.1	PLANT CADMIUM RESISTANCE 2	2.0404	2	2	0	0	0	0	28743000	0	0	0	0
AT1G14960.1	Polyketide cyclase/dehydrase and lipid transport superfamily protein	38.551	6	6	329460000	318040000	318140000	313540000	226230000	259020000	274160000	313080000	300410000
AT1G14980.1	chaperonin 10	59.727	7	7	498050000	263600000	253390000	195010000	288640000	221000000	194830000	183190000	166580000
AT1G15120.1;AT1G15120.2;AT2G01090.2;AT2G01090.1	Ubiquinol-cytochrome C reductase hinge protein ; Ubiquinol-cytochrome C reductase hinge protein ; Ubiquinol-cytochrome C reductase hinge protein ; Ubiquinol-cytochrome C reductase hinge protein	20.125	2;2;1;1	2;2;1;1	114310000	0	0	0	0	185990000	0	0	0
AT1G15130.1	Endosomal targeting BRO1-like domain-containing protein	57.289	8	8	178710000	163640000	211000000	203590000	173170000	179050000	165000000	165980000	166360000
AT1G15210.1	pleiotropic drug resistance 7	7.2186	12;1	4;1	69255000	18219000	0	0	0	0	0	0	0
AT1G15270.1	Translation machinery associated TMA7	3.5796	1	1	0	0	0	0	0	0	0	0	29652000
AT1G15340.1;AT1G15340.2	methyl-CPG-binding domain 10 ; methyl-CPG-binding domain 10	13.726	4;3	4;3	199970000	0	142390000	218750000	258360000	207240000	102070000	213360000	179400000
AT1G15500.1;AT1G80300.1	TLC ATP/ADP transporter ; nucleotide transporter 1	158.23	2;1	2;1	64359000	67402000	0	66560000	70120000	84800000	61776000	63472000	93352000
AT1G15540.1	2-oxoglutarate (2OG) and Fe(II)-dependent oxygenase superfamily protein	2.2654	1	1	0	0	0	0	0	0	0	0	297430000
AT1G15690.1	Inorganic H pyrophosphatase family protein	61.454	7;3	7;3	161210000	270550000	185690000	328260000	349930000	271990000	291800000	261140000	283510000
AT1G15750.4;AT1G15750.3;AT1G15750.2;AT1G15750.1;AT1G80490.1;AT1G80490.2	Transducin family protein / WD-40 repeat family protein ; Transducin family protein / WD-40 repeat family protein ; Transducin family protein / WD-40 repeat family protein ; Transducin family protein / WD-40 repeat family protein ; TOPLESS-related 1 ; TOP	160.88	12;12;12;12;11;11;2;2	8;8;8;8;7;7;0;0	267130000	284320000	312160000	265200000	249670000	270140000	291090000	309120000	263720000
AT1G15860.2;AT1G15860.1;AT1G15860.3	Domain of unknown function (DUF298) ; Domain of unknown function (DUF298) ; Domain of unknown function (DUF298)	2.9966	1;1;1	1;1;1	0	0	0	0	0	0	12878000	0	0
AT1G15880.1	golgi snare 11	1.5094	1	1	0	0	0	0	0	0	0	10338000	0
AT1G15930.2;AT1G15930.1	Ribosomal protein L7Ae/L30e/S12e/Gadd45 family protein ; Ribosomal protein L7Ae/L30e/S12e/Gadd45 family protein	117.36	6;6	4;4	2249400000	1850000000	2500100000	2222900000	2252900000	2319800000	2220100000	2517800000	2595600000
AT1G15950.2;AT1G15950.1	cinnamoyl coa reductase 1 ; cinnamoyl coa reductase 1	34.078	6;6	6;6	194280000	236220000	228990000	215640000	166190000	217680000	265160000	254470000	277180000
AT1G16340.3;AT1G16340.2;AT1G16340.1;AT1G16340.4;AT1G79500.5	Aldolase superfamily protein ; Aldolase superfamily protein ; Aldolase superfamily protein ; Aldolase superfamily protein ; Aldolase-type TIM barrel family protein	5.2009	4;4;4;4;2	2;2;2;2;0	58386000	56776000	54502000	59216000	46656000	55947000	0	0	0
AT1G16350.1	Aldolase-type TIM barrel family protein	27.176	7	5	234030000	214150000	152260000	243450000	178220000	191980000	213870000	207950000	250010000
AT1G16460.4;AT1G16460.3;AT1G16460.1;AT1G16460.2	rhodanese homologue 2 ; rhodanese homologue 2 ; rhodanese homologue 2 ; rhodanese homologue 2	2.8589	3;3;3;3	3;3;3;3	42546000	27821000	52260000	43871000	39419000	37948000	44046000	44691000	39780000
AT1G16470.2;AT1G16470.1;AT1G79210.3;AT1G79210.2;AT1G79210.1	proteasome subunit PAB1 ; proteasome subunit PAB1 ; N-terminal nucleophile aminohydrolases (Ntn hydrolases) superfamily protein ; N-terminal nucleophile aminohydrolases (Ntn hydrolases) superfamily protein ; N-terminal nucleophile aminohydrolases (Ntn hyd	261.97	10;10;9;9;9	10;10;9;9;9	1014800000	832600000	1009900000	992260000	942960000	968750000	837440000	914340000	854850000
AT1G16610.2;AT1G16610.1;AT1G16610.3	arginine/serine-rich 45 ; arginine/serine-rich 45 ; arginine/serine-rich 45	14.66	2;2;2	2;2;2	116050000	130790000	144850000	113940000	126830000	143850000	124000000	136950000	106450000
AT1G16700.1	Alpha-helical ferredoxin	2.3193	5	1	0	0	0	0	0	0	0	0	26003000
AT1G16810.2;AT1G16810.1	unknown protein; CONTAINS InterPro DOMAIN/s: Protein of unknown function DUF1754, eukaryotic (InterPro:IPR013865); Has 35333 Blast hits to 34131 proteins in 2444 species: Archae - 798; Bacteria - 22429; Metazoa - 974; Fungi - 991; Plants - 531; Viruses -	2.2143	1;1	1;1	0	0	0	0	0	0	0	11234000	0
AT1G16820.2;AT1G16820.1	vacuolar ATP synthase catalytic subunit-related / V-ATPase-related / vacuolar proton pump-related ; vacuolar ATP synthase catalytic subunit-related / V-ATPase-related / vacuolar proton pump-related	38.764	1;1	1;1	0	0	0	0	0	0	0	176320000	0
AT1G16870.1	mitochondrial 28S ribosomal protein S29-related	5.3489	2	2	31835000	38420000	0	0	44680000	59461000	44884000	46709000	42262000
AT1G16880.1	uridylyltransferase-related	6.5359	3;1	3;1	35573000	0	46598000	42160000	0	0	0	49334000	0
AT1G16890.2;AT1G16890.1;AT1G78870.2;AT1G16890.3;AT1G78870.3;AT1G78870.1	ubiquitin-conjugating enzyme 36 ; ubiquitin-conjugating enzyme 36 ; ubiquitin-conjugating enzyme 35 ; ubiquitin-conjugating enzyme 36 ; ubiquitin-conjugating enzyme 35 ; ubiquitin-conjugating enzyme 35	73.38	6;5;5;5;4;4	6;5;5;5;4;4	442280000	402900000	449640000	396240000	345920000	341650000	381000000	383890000	394030000
AT1G16920.1	RAB GTPase homolog A1B	2.2284	5	1	0	0	0	0	0	0	0	0	6543600
AT1G17020.1	senescence-related gene 1	3.1096	3	3	0	18796000	0	16074000	0	19672000	0	0	24657000
AT1G17160.2;AT1G17160.1	pfkB-like carbohydrate kinase family protein ; pfkB-like carbohydrate kinase family protein	6.605	1;1	1;1	0	0	0	0	0	0	0	0	38805000
AT1G17170.1	glutathione S-transferase TAU 24	13.311	7	5	161020000	173730000	213030000	191940000	154580000	172020000	238930000	176330000	206250000
AT1G17180.1	glutathione S-transferase TAU 25	43.674	9;1	8;1	361650000	296370000	341300000	300910000	282340000	285570000	328180000	295470000	368990000
AT1G17190.1	glutathione S-transferase tau 26	72.962	12	12	1037900000	1231500000	1270300000	1123300000	954800000	1045900000	1036200000	1074800000	1015000000
AT1G17290.1	alanine aminotransferas	181.38	17;3;3;3	17;3;3;3	729360000	647260000	664060000	617170000	657290000	711790000	625440000	700420000	711540000
AT1G17370.2;AT1G17370.1	oligouridylate binding protein 1B ; oligouridylate binding protein 1B	7.8814	4;4	2;2	0	0	17801000	0	0	28656000	16219000	17179000	16323000
AT1G17470.2;AT1G17470.1;AT1G72660.3;AT1G72660.2;AT1G72660.1	developmentally regulated G-protein 1 ; developmentally regulated G-protein 1 ; P-loop containing nucleoside triphosphate hydrolases superfamily protein ; P-loop containing nucleoside triphosphate hydrolases superfamily protein ; P-loop containing nucleos	10.731	3;3;2;2;2	3;3;2;2;2	42132000	44180000	113110000	83132000	48784000	62834000	86490000	81164000	68047000
AT1G17580.1	myosin 1	1.7482	1	1	0	0	0	0	0	0	0	0	1888800
AT1G17720.2;AT1G17720.1	Protein phosphatase 2A, regulatory subunit PR55 ; Protein phosphatase 2A, regulatory subunit PR55	13.69	4;4	3;3	35095000	31805000	26245000	0	0	0	30681000	32130000	34752000
AT1G17745.1;AT1G17745.2	D-3-phosphoglycerate dehydrogenase ; D-3-phosphoglycerate dehydrogenase	82.528	12;12	10;10	192530000	247460000	252100000	259880000	254740000	281100000	286090000	286500000	312070000
AT1G17860.1	Kunitz family trypsin and protease inhibitor protein	323.31	14	14	4008800000	3031400000	2858500000	2760200000	2361200000	2773700000	3813700000	3585600000	3517300000
AT1G17880.1	basic transcription factor 3	79.225	5	3	329970000	221570000	253730000	173350000	231640000	210440000	195360000	240010000	215980000
AT1G17890.3;AT1G17890.2;AT1G17890.1	NAD(P)-binding Rossmann-fold superfamily protein ; NAD(P)-binding Rossmann-fold superfamily protein ; NAD(P)-binding Rossmann-fold superfamily protein	44.127	8;8;8	5;5;5	347950000	387780000	375950000	370740000	331020000	383730000	367780000	378210000	388610000
AT1G18070.2;AT1G18070.1;AT1G18070.3	Translation elongation factor EF1A/initiation factor IF2gamma family protein ; Translation elongation factor EF1A/initiation factor IF2gamma family protein ; Translation elongation factor EF1A/initiation factor IF2gamma family protein	46.847	12;12;12	12;12;12	422890000	455270000	439400000	487590000	393010000	439930000	556150000	527390000	473120000
AT1G18080.1	Transducin/WD40 repeat-like superfamily protein	323.31	18	14	3761300000	3231400000	3515900000	3199600000	3223900000	3606900000	3092400000	3138400000	3454900000
AT1G18150.3;AT1G18150.2;AT1G18150.1	Protein kinase superfamily protein ; Protein kinase superfamily protein ; Protein kinase superfamily protein	2.2855	2;2;2	2;2;2	0	0	0	0	0	11610000	12064000	0	0
AT1G18210.2;AT1G18210.1	Calcium-binding EF-hand family protein ; Calcium-binding EF-hand family protein	141.5	8;8	8;8	379380000	377110000	466940000	384440000	315960000	401410000	343150000	307040000	257920000
AT1G18270.1;AT1G18270.3;AT1G18270.2	ketose-bisphosphate aldolase class-II family protein ; ketose-bisphosphate aldolase class-II family protein ; ketose-bisphosphate aldolase class-II family protein	207.11	28;28;27	28;28;27	759650000	694420000	765420000	704370000	578570000	776860000	631480000	599100000	583410000
AT1G18450.1	actin-related protein 4	8.9797	4	4	27101000	24969000	18116000	22897000	21700000	20819000	17855000	17669000	22185000
AT1G18500.1	methylthioalkylmalate synthase-like 4	35.63	8	4	53059000	74037000	57616000	71534000	66188000	75631000	61594000	63707000	59881000
AT1G18540.1	Ribosomal protein L6 family protein	7.1183	10	4	128080000	133010000	115200000	160940000	139550000	121120000	120190000	100830000	101760000
AT1G18590.1	sulfotransferase 17	5.8687	5	3	0	15597000	42921000	30410000	29400000	40110000	28603000	22094000	12869000
AT1G18630.1	glycine-rich RNA-binding protein 6	4.7516	3	3	0	0	0	0	0	0	0	38159000	0
AT1G18720.1	Protein of unknown function (DUF962)	2.6305	1	1	0	0	0	0	0	0	0	0	3970300
AT1G18800.1	NAP1-related protein 2	59.357	6	3	0	64257000	136070000	113650000	104450000	99288000	67313000	81216000	67930000
AT1G18970.1	germin-like protein 4	6.8999	2	2	0	0	0	0	0	0	0	0	106970000
AT1G18980.1	RmlC-like cupins superfamily protein	52.43	4	4	840850000	771460000	597310000	606120000	586180000	702120000	542990000	704030000	660960000
AT1G19110.1	inter-alpha-trypsin inhibitor heavy chain-related	4.4277	3	3	19356000	24900000	0	23998000	35946000	0	0	21318000	14850000
AT1G19130.1	CONTAINS InterPro DOMAIN/s: Protein of unknown function DUF985 (InterPro:IPR009327), RmlC-like jelly roll fold (InterPro:IPR014710); Has 1465 Blast hits to 1465 proteins in 584 species: Archae - 10; Bacteria - 1038; Metazoa - 19; Fungi - 43; Plants - 51;	50.686	5	5	137780000	182550000	277240000	204180000	131150000	188430000	191510000	231880000	192260000
AT1G19140.1;AT1G19140.2	FUNCTIONS IN: molecular_function unknown; INVOLVED IN: ubiquinone biosynthetic process; LOCATED IN: mitochondrion; EXPRESSED IN: 24 plant structures; EXPRESSED DURING: 15 growth stages; CONTAINS InterPro DOMAIN/s: COQ9 (InterPro:IPR013718), Ubiquinone bio	20.501	4;4	4;4	135280000	139670000	117540000	94510000	129850000	143360000	136010000	91274000	64405000
AT1G19360.1	Nucleotide-diphospho-sugar transferase family protein	13.141	5	5	93465000	99200000	73441000	106670000	114820000	102840000	132470000	121310000	134320000
AT1G19520.1	pentatricopeptide (PPR) repeat-containing protein	15.501	5;2	5;2	0	25286000	34952000	35297000	30790000	31538000	28242000	23588000	39601000
AT1G19570.1;AT1G19570.2	dehydroascorbate reductase ; dehydroascorbate reductase	323.31	15;13;5	15;13;5	3818400000	3508500000	4013300000	3965000000	3647100000	3159900000	4294400000	4727700000	4708700000
AT1G19580.1;AT1G19580.2	gamma carbonic anhydrase 1 ; gamma carbonic anhydrase 1	61.334	8;7	4;3	98748000	85308000	88387000	79784000	84166000	98840000	84704000	87576000	94478000
AT1G19730.1	Thioredoxin superfamily protein	1.8609	2	2	18242000	18785000	30763000	28011000	19118000	18359000	31276000	27028000	25232000
AT1G19835.2;AT1G19835.1	Plant protein of unknown function (DUF869) ; Plant protein of unknown function (DUF869)	1.3456	1;1	1;1	0	0	0	0	0	0	1225200	0	0
AT1G19870.1	IQ-domain 32	27.586	4	4	84680000	100040000	71904000	93768000	106870000	104410000	85584000	73159000	108920000
AT1G19880.1	Regulator of chromosome condensation (RCC1) family protein	3.2687	3	3	0	0	26586000	0	0	0	44507000	0	0
AT1G19920.1	Pseudouridine synthase/archaeosine transglycosylase-like family protein	16.388	5	4	50268000	67887000	117510000	36192000	79015000	81476000	100760000	64346000	59019000
AT1G20010.1	tubulin beta-5 chain	145.97	23	5	827440000	863880000	855220000	760200000	740680000	828570000	741070000	706320000	772410000
AT1G20050.1	C-8,7 sterol isomerase	19.402	1	1	0	0	0	0	0	0	0	0	56377000
AT1G20110.1	RING/FYVE/PHD zinc finger superfamily protein	10.567	4	4	45523000	62065000	39889000	50023000	46062000	44483000	60555000	51096000	78660000
AT1G20200.1	PAM domain (PCI/PINT associated module) protein	69.569	13	6	679290000	801420000	568050000	716680000	764300000	811030000	855560000	645140000	866160000
AT1G20220.1	Alba DNA/RNA-binding protein	40.211	4	3	140440000	121550000	152100000	127840000	102640000	158020000	106630000	128520000	121400000
AT1G20225.1	Thioredoxin superfamily protein	17.641	3	3	126280000	414370000	297010000	423890000	97231000	346270000	148610000	319560000	296390000
AT1G76030.1;AT1G20260.1	ATPase, V1 complex, subunit B protein ; ATPase, V1 complex, subunit B protein	14.667	24;24	3;3	881140000	1164400000	1019000000	1077000000	857200000	1001600000	1138000000	1185200000	1113500000
AT1G20330.1	sterol methyltransferase 2	56.489	9	9	225240000	233970000	243510000	252960000	305320000	294300000	212630000	249490000	279070000
AT1G20370.1	Pseudouridine synthase family protein	2.2204	1	1	0	0	0	0	0	0	0	17143000	0
AT1G20440.1	cold-regulated 47	323.31	10	9	2827500000	2501800000	1817100000	2322400000	2040900000	2434600000	1730700000	1620000000	2296000000
AT1G20450.2;AT1G20450.1	Dehydrin family protein ; Dehydrin family protein	67.543	9;9	9;9	372740000	410740000	286460000	368610000	386010000	243600000	313890000	278560000	398110000
AT1G20510.1;AT1G20510.2	OPC-8:0 CoA ligase1 ; OPC-8:0 CoA ligase1	8.4473	2;1	2;1	82725000	82768000	49658000	42668000	56822000	77889000	55094000	42103000	0
AT1G20560.2;AT1G20560.1	acyl activating enzyme 1 ; acyl activating enzyme 1	1.9505	1;1	1;1	0	0	0	0	0	0	0	0	21093000
AT1G20575.1	Nucleotide-diphospho-sugar transferases superfamily protein	2.8564	2	2	0	0	0	0	0	0	0	0	17698000
AT1G20580.1	Small nuclear ribonucleoprotein family protein	40.334	3;1;1	3;1;1	172480000	218290000	276620000	185530000	201860000	157860000	362000000	336370000	257350000
AT1G20620.1;AT1G20620.5;AT1G20620.2;AT1G20620.4	catalase 3 ; catalase 3 ; catalase 3 ; catalase 3	156.32	19;18;17;14	12;11;10;10	571030000	468470000	690790000	511580000	581070000	454360000	536140000	508510000	577690000
AT1G20693.2;AT1G20693.3;AT1G20693.1	high mobility group B2 ; high mobility group B2 ; high mobility group B2	3.0202	1;1;1	1;1;1	0	0	0	0	0	68462000	0	0	0
AT1G20696.3;AT1G20696.1;AT1G20696.2	high mobility group B3 ; high mobility group B3 ; high mobility group B3	3.2341	1;1;1	1;1;1	0	0	0	27668000	0	0	0	0	0
AT1G20760.1	Calcium-binding EF hand family protein	9.6842	3	3	0	0	0	0	51352000	0	0	0	0
AT1G20840.1	tonoplast monosaccharide transporter1	99.976	6	6	225700000	147070000	227400000	192690000	218760000	199200000	172420000	172420000	184430000
AT1G20850.1	xylem cysteine peptidase 2	14.737	4	4	0	0	27770000	0	19172000	22800000	24781000	23641000	17920000
AT1G20950.1	Phosphofructokinase family protein	272	19	10	853650000	902630000	798590000	815400000	925290000	892550000	790490000	694780000	806200000
AT1G20960.2;AT1G20960.1	U5 small nuclear ribonucleoprotein helicase, putative ; U5 small nuclear ribonucleoprotein helicase, putative	87.338	21;21;6	21;21;6	404440000	335690000	379480000	368830000	308610000	338610000	324990000	329510000	321300000
AT1G20970.1	FUNCTIONS IN: molecular_function unknown; INVOLVED IN: biological_process unknown; LOCATED IN: plasma membrane, vacuole; EXPRESSED IN: guard cell, cultured cell; BEST Arabidopsis thaliana protein match is: proton pump interactor 1 (TAIR:AT4G27500.1); Has	61.529	2	2	56161000	59261000	43067000	51617000	59746000	64390000	73842000	56888000	63277000
AT1G21080.2;AT1G21080.1;AT1G21080.3	DNAJ heat shock N-terminal domain-containing protein ; DNAJ heat shock N-terminal domain-containing protein ; DNAJ heat shock N-terminal domain-containing protein	10.188	3;3;3	3;3;3	23006000	32352000	26716000	27921000	22931000	28091000	25186000	23919000	22375000
AT1G21090.1	Cupredoxin superfamily protein	2.2651	1	1	0	0	0	0	0	0	0	0	38480000
AT1G21100.1	O-methyltransferase family protein	54.64	11	1	407120000	462750000	399880000	375110000	315570000	389660000	463580000	442960000	381250000
AT1G21120.1;AT1G21110.1	O-methyltransferase family protein ; O-methyltransferase family protein	5.304	9;8	1;1	0	0	0	32400000	30453000	0	38632000	32349000	0
AT1G21380.1	Target of Myb protein 1	77.868	4	3	145170000	131640000	190230000	118090000	156480000	166670000	124390000	125100000	73370000
AT1G21440.1	Phosphoenolpyruvate carboxylase family protein	24.419	4	4	0	0	127200000	82680000	96680000	62021000	81120000	104500000	82657000
AT1G21630.1;AT1G21630.2	Calcium-binding EF hand family protein ; Calcium-binding EF hand family protein	3.3296	2;2	2;2	0	0	0	0	0	0	0	16043000	0
AT1G21660.1	Chaperone DnaJ-domain superfamily protein	3.5788	1	1	0	0	0	0	0	0	0	0	21513000
AT1G21680.1	DPP6 N-terminal domain-like protein	27.332	3	3	76648000	63821000	76230000	69143000	53717000	0	69811000	70448000	50779000
AT1G21720.1	proteasome beta subunit C1	97.741	7	1	477670000	443340000	536960000	409100000	393350000	461270000	402750000	426400000	349020000
AT1G21750.1;AT1G21750.2	PDI-like 1-1 ; PDI-like 1-1	323.31	27;25	23;22	3756700000	3997700000	3585100000	3921900000	4035700000	4046100000	3460100000	3621700000	3432400000
AT1G21770.1	Acyl-CoA N-acyltransferases (NAT) superfamily protein	4.2564	2	2	64343000	46394000	43621000	64994000	42679000	45687000	61743000	67140000	74839000
AT1G21880.1;AT1G21880.2	lysm domain GPI-anchored protein 1 precursor ; lysm domain GPI-anchored protein 1 precursor	18.171	2;2	2;2	29084000	33825000	53610000	41665000	42099000	34897000	45992000	46953000	26803000
AT1G21900.1	emp24/gp25L/p24 family/GOLD family protein	3.0117	1	1	0	0	0	0	0	0	0	0	35380000
AT1G22060.1	LOCATED IN: vacuole; EXPRESSED IN: 23 plant structures; EXPRESSED DURING: 13 growth stages; BEST Arabidopsis thaliana protein match is: FBD, F-box and Leucine Rich Repeat domains containing protein (TAIR:AT1G22000.1); Has 84739 Blast hits to 38714 protein	3.6052	2	2	80336000	0	0	79468000	0	0	57281000	186380000	114000000
AT1G22170.1;AT1G78050.1	Phosphoglycerate mutase family protein ; phosphoglycerate/bisphosphoglycerate mutase	6.5965	3;2	3;2	0	12890000	11458000	16580000	13254000	13941000	20831000	14106000	25799000
AT1G22200.2;AT1G22200.1	Endoplasmic reticulum vesicle transporter protein ; Endoplasmic reticulum vesicle transporter protein	7.0531	1;1	1;1	0	0	0	0	0	0	0	0	11814000
AT1G22270.1	Trm112p-like protein	4.2947	2	2	62131000	67780000	100470000	93460000	59170000	79008000	0	96157000	116880000
AT1G22280.1;AT1G22280.3	phytochrome-associated protein phosphatase type 2C ; phytochrome-associated protein phosphatase type 2C	1.4403	1;1	1;1	0	0	0	0	0	0	0	0	16342000
AT1G22300.2;AT1G22300.1;AT1G22300.3	general regulatory factor 10 ; general regulatory factor 10 ; general regulatory factor 10	323.31	16;16;13;3;3;1;1	15;15;12;2;2;1;1	2180800000	2172300000	1688600000	1891800000	1956600000	1940600000	2076000000	1838900000	2352900000
AT1G78260.2;AT1G78260.1;AT1G22330.1;AT1G22910.2;AT1G22910.1;AT1G20880.2;AT1G20880.1;AT1G76460.1;AT1G22910.3	RNA-binding (RRM/RBD/RNP motifs) family protein ; RNA-binding (RRM/RBD/RNP motifs) family protein ; RNA-binding (RRM/RBD/RNP motifs) family protein ; RNA-binding (RRM/RBD/RNP motifs) family protein ; RNA-binding (RRM/RBD/RNP motifs) family protein ; RNA-b	2.2618	2;2;2;1;1;1;1;1;1	2;2;2;1;1;1;1;1;1	0	45788000	0	0	0	42511000	0	0	18897000
AT1G22360.1;AT1G22360.2	UDP-glucosyl transferase 85A2 ; UDP-glucosyl transferase 85A2	22.371	7;6;1	7;6;1	182300000	218550000	229610000	230840000	231970000	222190000	178230000	204580000	168920000
AT1G22410.1	Class-II DAHP synthetase family protein	143.12	12	10	225650000	330820000	286860000	274510000	351480000	302310000	271240000	305880000	396220000
AT1G22440.1	Zinc-binding alcohol dehydrogenase family protein	150.86	11	11	685150000	623800000	518570000	522040000	566270000	567500000	538080000	572200000	515940000
AT1G22450.1	cytochrome C oxidase 6B	111.01	4	4	418550000	377670000	230920000	349990000	365080000	394510000	246130000	191030000	271420000
AT1G22530.1	PATELLIN 2	323.31	28	25	2281400000	2494700000	1757400000	2085800000	2201000000	1872300000	2111700000	1615000000	2263900000
AT1G22650.1	Plant neutral invertase family protein	7.297	2	1	0	0	0	0	38787000	0	48107000	0	34895000
AT4G09800.1;AT1G34030.1;AT1G22780.1	S18 ribosomal protein ; Ribosomal protein S13/S18 family ; Ribosomal protein S13/S18 family	106.21	7;7;7	7;7;7	2753900000	2037600000	2636200000	2518500000	2998700000	2335700000	2465900000	2250700000	2165200000
AT1G22840.1;AT1G22840.2	CYTOCHROME C-1 ; CYTOCHROME C-1	1.5108	2;1	1;1	0	0	0	0	0	0	4696000	0	0
AT1G22880.2;AT1G71380.1;AT1G22880.1	cellulase 5 ; cellulase 3 ; cellulase 5	2.7566	1;1;1	1;1;1	0	0	0	0	0	0	0	0	15975000
AT1G22920.1;AT1G22920.2	COP9 signalosome 5A ; COP9 signalosome 5A	15.385	4;3;1	4;3;1	112170000	79469000	102000000	67422000	83772000	64895000	99199000	72193000	74582000
AT1G23100.1	GroES-like family protein	4.5506	1	1	0	0	0	0	0	0	0	0	19246000
AT1G23120.1	Polyketide cyclase/dehydrase and lipid transport superfamily protein	2.6323	1	1	0	0	0	0	0	0	0	0	11495000
AT1G23190.1	Phosphoglucomutase/phosphomannomutase family protein	323.31	27	17	2509100000	2760400000	2850300000	2476600000	2454100000	2478100000	2473400000	2177900000	2405000000
AT1G70600.1;AT1G23290.1	Ribosomal protein L18e/L15 superfamily protein ; Ribosomal protein L18e/L15 superfamily protein	20.386	4;4	4;4	1114500000	1048000000	1030400000	1118800000	1148700000	1110100000	966870000	1155400000	1002300000
AT1G23440.1	Peptidase C15, pyroglutamyl peptidase I-like	22.595	7;3	6;3	0	109550000	0	0	0	0	0	0	0
AT1G70490.3;AT1G70490.2;AT1G70490.1;AT1G23490.1	Ras-related small GTP-binding family protein ; Ras-related small GTP-binding family protein ; Ras-related small GTP-binding family protein ; ADP-ribosylation factor 1	323.31	10;10;10;10	1;1;1;1	1926700000	2885200000	3401000000	2448900000	2396500000	3121600000	2757500000	2585000000	2382000000
AT1G23800.1	aldehyde dehydrogenase 2B7	51.124	13	12	153390000	202730000	191130000	162180000	160310000	183930000	227790000	155790000	221540000
AT1G23820.1;AT1G23820.2	spermidine synthase 1 ; spermidine synthase 1	191.13	14;12	10;8	503920000	513950000	661820000	555510000	561580000	530290000	490060000	591650000	514450000
AT1G23870.1	trehalose-phosphatase/synthase 9	1.1069	1	1	0	0	0	0	0	0	0	6902100	0
AT1G23900.2;AT1G23900.1	gamma-adaptin 1 ; gamma-adaptin 1	21.909	5;5	5;5	75858000	64395000	78177000	72115000	57226000	97983000	72701000	75279000	47887000
AT1G24050.1	RNA-processing, Lsm domain	16.798	4	4	77079000	112430000	148870000	120910000	112290000	156840000	117980000	140320000	63846000
AT1G24100.1	UDP-glucosyl transferase 74B1	28.544	5	5	100320000	89048000	149060000	100170000	132750000	97518000	102600000	56652000	105440000
AT1G24180.1	Thiamin diphosphate-binding fold (THDP-binding) superfamily protein	131.88	13	10	1315600000	1121700000	1167500000	1286900000	1365800000	1096800000	1353000000	1275400000	1701200000
AT1G24280.1	glucose-6-phosphate dehydrogenase 3	14.698	11	6	233060000	267440000	214590000	156750000	276760000	275250000	241980000	192040000	185050000
AT1G24300.2;AT1G24300.1	GYF domain-containing protein ; GYF domain-containing protein	2.697	1;1	1;1	0	0	0	0	0	0	0	0	3532300
AT1G24360.1	NAD(P)-binding Rossmann-fold superfamily protein	135.95	6	6	367340000	283710000	325820000	269450000	263940000	216870000	376110000	160680000	390460000
AT1G24510.1;AT1G24510.2	TCP-1/cpn60 chaperonin family protein ; TCP-1/cpn60 chaperonin family protein	323.31	18;17;1	18;17;1	727840000	888950000	865130000	926230000	925760000	820580000	916280000	873690000	976140000
AT1G24560.1	unknown protein; BEST Arabidopsis thaliana protein match is: unknown protein (TAIR:AT3G49055.1); Has 71940 Blast hits to 38124 proteins in 2481 species: Archae - 1358; Bacteria - 12126; Metazoa - 32861; Fungi - 6786; Plants - 4024; Viruses - 195; Other Eu	2.0799	2	2	0	0	0	0	0	0	0	12930000	0
AT1G25230.1	Calcineurin-like metallo-phosphoesterase superfamily protein	1.3511	1	1	0	0	0	0	0	0	0	0	12155000
AT1G25260.1	Ribosomal protein L10 family protein	1.5172	1	1	0	0	0	0	0	0	0	0	24147000
AT1G25350.1;AT1G25350.2	glutamine-tRNA ligase, putative / glutaminyl-tRNA synthetase, putative / GlnRS, putative ; glutamine-tRNA ligase, putative / glutaminyl-tRNA synthetase, putative / GlnRS, putative	16.629	7;6	7;6	75705000	101050000	123360000	110700000	80243000	91255000	99747000	106690000	87139000
AT1G25420.3;AT1G25420.2;AT1G25420.1	Regulator of Vps4 activity in the MVB pathway protein ; Regulator of Vps4 activity in the MVB pathway protein ; Regulator of Vps4 activity in the MVB pathway protein	3.5201	1;1;1	1;1;1	0	0	0	0	0	0	0	0	6321800
AT1G25490.1	ARM repeat superfamily protein	160.02	14	10	165890000	221120000	226510000	233760000	216310000	264050000	214110000	217280000	133140000
AT1G25520.1	Uncharacterized protein family (UPF0016)	2.9991	1	1	0	0	0	6872800	0	0	0	0	0
AT1G26110.2;AT1G26110.1	decapping 5 ; decapping 5	4.1939	2;2	2;2	0	0	0	0	0	0	0	0	41206000
AT1G26340.1	cytochrome B5 isoform A	8.5547	2	2	0	0	0	58728000	60519000	0	0	59918000	0
AT1G26460.1	Tetratricopeptide repeat (TPR)-like superfamily protein	15.178	6	6	74470000	77691000	0	115410000	75793000	66505000	72042000	93006000	85604000
AT1G26630.1;AT1G26630.2	Eukaryotic translation initiation factor 5A-1 (eIF-5A 1) protein ; Eukaryotic translation initiation factor 5A-1 (eIF-5A 1) protein	255.12	7;5	6;4	1097800000	1338500000	1063500000	962160000	1054000000	1102600000	1238100000	922930000	1258000000
AT1G26640.1	Amino acid kinase family protein	10.716	3	3	0	17129000	6359800	9140200	9570200	21715000	16801000	0	25812000
AT1G26820.1;AT2G02990.1	ribonuclease 3 ; ribonuclease 1	2.1602	1;1	1;1	0	0	0	0	0	0	0	0	12291000
AT1G26850.2;AT1G26850.1;AT1G26850.3	S-adenosyl-L-methionine-dependent methyltransferases superfamily protein ; S-adenosyl-L-methionine-dependent methyltransferases superfamily protein ; S-adenosyl-L-methionine-dependent methyltransferases superfamily protein	29.754	5;5;4	5;5;4	98749000	78187000	82151000	89249000	111310000	87953000	89946000	93862000	81890000
AT1G26880.1;AT1G26880.2	Ribosomal protein L34e superfamily protein ; Ribosomal protein L34e superfamily protein	10.451	4;3	1;1	321280000	347770000	226510000	352520000	366780000	368300000	378000000	299900000	479270000
AT1G27020.1	unknown protein; BEST Arabidopsis thaliana protein match is: unknown protein (TAIR:AT1G27030.1); Has 514 Blast hits to 514 proteins in 175 species: Archae - 0; Bacteria - 311; Metazoa - 0; Fungi - 0; Plants - 65; Viruses - 0; Other Eukaryotes - 138 (sourc	7.2345	3	3	31488000	30249000	54402000	0	40293000	55586000	36627000	42890000	20050000
AT1G27030.1	unknown protein; BEST Arabidopsis thaliana protein match is: unknown protein (TAIR:AT1G27020.1); Has 504 Blast hits to 502 proteins in 169 species: Archae - 0; Bacteria - 299; Metazoa - 0; Fungi - 0; Plants - 67; Viruses - 0; Other Eukaryotes - 138 (sourc	116.99	5	5	143060000	140540000	146930000	132880000	124660000	158160000	145540000	131240000	188750000
AT1G27090.1	glycine-rich protein	256.75	9	9	360380000	341270000	330200000	311270000	381470000	353880000	319840000	333330000	354320000
AT1G27130.1	glutathione S-transferase tau 13	26.822	5	4	366390000	488780000	645780000	431130000	364620000	416910000	521350000	452950000	423680000
AT1G27140.1	glutathione S-transferase tau 14	2.8523	3	2	0	0	0	0	0	0	0	0	13919000
AT1G27150.1	Tetratricopeptide repeat (TPR)-like superfamily protein	1.247	2	2	16086000	0	0	0	0	0	0	0	0
AT1G27310.1	nuclear transport factor 2A	132.9	5	5	444130000	552140000	863660000	509080000	535040000	697640000	436700000	537460000	485140000
AT1G27390.1	translocase outer membrane 20-2	25.542	3	3	91580000	97285000	112040000	87503000	105340000	92690000	77924000	83327000	84790000
AT1G27400.1;AT1G67430.1	Ribosomal protein L22p/L17e family protein ; Ribosomal protein L22p/L17e family protein	59.623	5;4;2	5;4;2	1650000000	1881300000	2264000000	2135800000	2324200000	1894300000	1551200000	2264500000	1386200000
AT1G27450.2;AT1G27450.1;AT1G27450.3	adenine phosphoribosyl transferase 1 ; adenine phosphoribosyl transferase 1 ; adenine phosphoribosyl transferase 1	169.76	9;8;8	9;8;8	720100000	776430000	928070000	753910000	656050000	766770000	699500000	793340000	492340000
AT1G27530.1	CONTAINS InterPro DOMAIN/s: Ubiquitin-conjugating enzyme/RWD-like (InterPro:IPR016135), Ubiquitin-fold modifier-conjugating enzyme 1 (InterPro:IPR014806); Has 269 Blast hits to 269 proteins in 110 species: Archae - 0; Bacteria - 0; Metazoa - 175; Fungi -	9.6488	2	2	26550000	31362000	0	0	41428000	0	43722000	66968000	0
AT1G27650.1;AT1G27650.2;AT5G42820.2;AT5G42820.1	U2 snRNP auxiliary factor small subunit, putative ; U2 snRNP auxiliary factor small subunit, putative ; Zinc finger C-x8-C-x5-C-x3-H type family protein ; Zinc finger C-x8-C-x5-C-x3-H type family protein	4.9835	2;1;1;1	2;1;1;1	0	20594000	27913000	24602000	30394000	0	0	0	0
AT1G27680.1	ADPGLC-PPase large subunit	3.705	1	1	0	0	0	0	0	0	0	0	18404000
AT1G27752.2;AT1G27752.1	Ubiquitin system component Cue protein ; Ubiquitin system component Cue protein	1.4754	1;1	1;1	0	0	0	0	0	0	0	0	4935000
AT1G27770.2;AT1G27770.1	autoinhibited Ca2+-ATPase 1 ; autoinhibited Ca2+-ATPase 1	4.9693	2;2	2;2	22251000	26164000	21638000	27297000	27832000	25724000	25926000	23106000	21140000
AT1G27930.1	Protein of unknown function (DUF579)	6.7562	2	2	0	0	0	0	0	0	0	0	9546400
AT1G27950.1	glycosylphosphatidylinositol-anchored lipid protein transfer 1	1.3592	1	1	0	0	0	0	0	0	0	0	5863200
AT1G27970.1;AT1G27970.2	nuclear transport factor 2B ; nuclear transport factor 2B	41.685	5;4	5;4	379590000	401600000	442440000	461580000	373880000	402550000	534490000	460230000	518470000
AT1G28120.1	CONTAINS InterPro DOMAIN/s: Ovarian tumour, otubain (InterPro:IPR003323), Ubiquitin thioesterase Otubain (InterPro:IPR016615), Peptidase C65, otubain (InterPro:IPR019400); Has 413 Blast hits to 411 proteins in 139 species: Archae - 0; Bacteria - 0; Metazo	7.5441	3	3	71326000	55842000	64374000	69610000	0	67413000	71234000	69035000	80388000
AT1G28130.1;AT1G28130.2	Auxin-responsive GH3 family protein ; Auxin-responsive GH3 family protein	194.1	10;8	10;8	399120000	347080000	320860000	287500000	299190000	428170000	360220000	317390000	316120000
AT1G28200.1	FH interacting protein 1	1.8465	2	2	0	0	0	0	0	0	12291000	0	0
AT1G28290.2;AT1G28290.1	arabinogalactan protein 31 ; arabinogalactan protein 31	103.83	5;5	5;5	1752900000	1544000000	1550500000	2035200000	1947900000	1794300000	1777100000	1992500000	1574000000
AT1G28580.2;AT1G28580.1	GDSL-like Lipase/Acylhydrolase superfamily protein ; GDSL-like Lipase/Acylhydrolase superfamily protein	49.193	5;5;1	5;5;1	54434000	68252000	100480000	53551000	95396000	81164000	110340000	84893000	60671000
AT1G28660.1	GDSL-like Lipase/Acylhydrolase superfamily protein	1.3517	1	1	0	0	0	0	0	0	0	0	2956200
AT1G28680.1	HXXXD-type acyl-transferase family protein	76.783	6	6	238770000	213400000	201400000	255360000	223460000	186250000	164130000	224120000	177030000
AT1G28960.4;AT1G28960.2;AT1G28960.5;AT1G28960.3;AT1G28960.1	nudix hydrolase homolog 15 ; nudix hydrolase homolog 15 ; nudix hydrolase homolog 15 ; nudix hydrolase homolog 15 ; nudix hydrolase homolog 15	7.8117	3;3;3;3;3	3;3;3;3;3	0	0	37883000	0	0	41047000	34052000	27493000	15615000
AT1G29030.1	Apoptosis inhibitory protein 5 (API5)	2.5784	1	1	0	0	0	0	0	0	0	0	3382500
AT1G29150.1	non-ATPase subunit 9	86.554	15	15	418310000	486820000	646280000	550150000	526720000	552440000	515850000	546500000	564540000
AT1G29250.1;AT3G04620.1	Alba DNA/RNA-binding protein ; Alba DNA/RNA-binding protein	24.785	4;2	1;0	312810000	384590000	484180000	412290000	356900000	384760000	357940000	415740000	252710000
AT1G29260.1	peroxin 7	1.2077	1	1	0	0	0	0	0	0	0	0	0
AT2G34250.2;AT2G34250.1;AT1G29310.1	SecY protein transport family protein ; SecY protein transport family protein ; SecY protein transport family protein	80.458	3;3;3	3;3;3	121510000	111110000	92862000	108900000	133030000	149810000	100050000	104150000	150260000
AT1G29370.1;AT1G29350.1	Kinase-related protein of unknown function (DUF1296) ; Kinase-related protein of unknown function (DUF1296)	132.14	7;6	7;6	151300000	152180000	141120000	173810000	166570000	159130000	174700000	161630000	194430000
AT1G29470.2;AT1G29470.1	S-adenosyl-L-methionine-dependent methyltransferases superfamily protein ; S-adenosyl-L-methionine-dependent methyltransferases superfamily protein	36.092	6;6;2;1	4;4;0;0	87682000	83303000	76779000	79963000	99364000	93688000	87334000	60934000	85333000
AT1G29690.1	MAC/Perforin domain-containing protein	3.4157	3	3	25409000	0	0	0	0	0	0	28717000	0
AT1G29850.1;AT1G29850.2;AT1G29850.3	double-stranded DNA-binding family protein ; double-stranded DNA-binding family protein ; double-stranded DNA-binding family protein	97.099	4;4;4	4;4;4	123850000	132820000	128660000	126440000	117350000	125180000	135150000	142080000	135940000
AT1G29880.1	glycyl-tRNA synthetase / glycine--tRNA ligase	80.017	17;1	17;1	307270000	255810000	315560000	301830000	305210000	285050000	283920000	284720000	285080000
AT1G29900.1	carbamoyl phosphate synthetase B	191.2	20	20	621720000	553480000	653430000	568410000	575190000	581290000	558770000	524410000	496010000
AT1G29990.1	prefoldin 6	8.1395	2	2	91587000	126240000	130030000	94076000	111560000	121570000	141050000	157230000	101720000
AT1G30070.1;AT1G30070.2	SGS domain-containing protein ; SGS domain-containing protein	1.9712	1;1	1;1	0	0	0	0	0	0	0	0	6644500
AT1G30120.1	pyruvate dehydrogenase E1 beta	105.42	4	1	272790000	213110000	234440000	194450000	257510000	252450000	223120000	215120000	192160000
AT1G30230.1;AT1G30230.2	Glutathione S-transferase, C-terminal-like;Translation elongation factor EF1B/ribosomal protein S6 ; Glutathione S-transferase, C-terminal-like;Translation elongation factor EF1B/ribosomal protein S6	323.31	14;14	8;8	1487000000	1779000000	1772000000	1654100000	1896500000	1932000000	1731700000	1588000000	1642600000
AT1G30300.1	Metallo-hydrolase/oxidoreductase superfamily protein	1.367	1	1	0	0	0	0	0	0	0	0	3805800
AT1G30360.1	Early-responsive to dehydration stress protein (ERD4)	23.094	5	5	119630000	156080000	93382000	140790000	150410000	122940000	133570000	129470000	129430000
AT1G30400.2;AT1G30400.1	multidrug resistance-associated protein 1 ; multidrug resistance-associated protein 1	13.691	6;6	4;4	52882000	40827000	72087000	81276000	63797000	77569000	58916000	125210000	77060000
AT1G30470.3;AT1G30470.2;AT1G30470.1	SIT4 phosphatase-associated family protein ; SIT4 phosphatase-associated family protein ; SIT4 phosphatase-associated family protein	17.039	3;3;3	3;3;3	61265000	69161000	37060000	47639000	48560000	58544000	50739000	36416000	36521000
AT1G30510.3;AT1G30510.1;AT1G30510.2	root FNR 2 ; root FNR 2 ; root FNR 2	168.37	14;14;14	10;10;10	1372900000	1292800000	1373900000	1218500000	1705100000	1326900000	1246500000	1176600000	1221000000
AT1G30580.1	GTP binding	206.72	21	21	1752000000	1843000000	1989600000	1836000000	1997400000	2135400000	1678500000	1866900000	1650900000
AT1G30630.1	Coatomer epsilon subunit	133.27	11;2;2	11;2;2	676260000	607360000	756970000	663750000	544820000	691410000	499340000	541480000	476960000
AT1G30690.2;AT1G30690.1	Sec14p-like phosphatidylinositol transfer family protein ; Sec14p-like phosphatidylinositol transfer family protein	99.824	17;17	17;17	830880000	878580000	752650000	815790000	727810000	838610000	744480000	652860000	758710000
AT1G30700.1	FAD-binding Berberine family protein	22.031	6	6	249350000	283260000	201230000	223580000	187530000	291790000	218050000	192900000	232560000
AT1G30720.1	FAD-binding Berberine family protein	3.7778	2	1	0	0	0	0	0	0	2534400	0	0
AT1G30730.1	FAD-binding Berberine family protein	5.2726	4	3	0	0	0	0	32386000	0	0	0	0
AT1G30870.1	Peroxidase superfamily protein	11.02	3	3	34883000	54531000	0	30670000	28830000	0	0	0	28271000
AT1G30890.2;AT1G30890.1;AT3G59500.1	Integral membrane HRF1 family protein ; Integral membrane HRF1 family protein ; Integral membrane HRF1 family protein	8.1154	2;2;1	2;2;1	0	0	0	0	0	0	0	15467000	0
AT1G31070.2	N-acetylglucosamine-1-phosphate uridylyltransferase 1	31.198	9;1	5;0	282180000	126430000	171190000	123870000	150270000	147510000	149830000	135980000	105200000
AT1G31180.1	isopropylmalate dehydrogenase 3	21.315	6	2	111030000	113240000	149970000	68695000	201610000	78313000	122050000	126460000	99164000
AT2G35635.1;AT1G31340.1;AT3G52590.1;AT2G36170.1;AT4G05050.4;AT4G05050.3;AT4G05050.2;AT4G05050.1;AT4G02890.2;AT4G02890.1;AT1G55060.1;AT4G05320.5;AT4G02890.4;AT4G02890.3;AT5G03240.3;AT5G03240.2;AT5G03240.1;AT1G65350.1;AT5G37640.1;AT4G05320.6;AT4G05320.3;AT4G05320.1;AT5G20620.1;AT4G05320.4;AT4G05320.2;AT3G09790.1	ubiquitin 7 ; related to ubiquitin 1 ; ubiquitin extension protein 1 ; Ubiquitin supergroup;Ribosomal protein L40e ; ubiquitin 11 ; ubiquitin 11 ; ubiquitin 11 ; ubiquitin 11 ; Ubiquitin family protein ; Ubiquitin family protein ; ubiquitin 12 ; polyubiqu	323.31	6;6;4;4;4;4;4;4;4;4;4;4;4;4;4;4;4;4;4;4;4;4;4;4;4;4	2;2;0;0;0;0;0;0;0;0;0;0;0;0;0;0;0;0;0;0;0;0;0;0;0;0	4684200000	4404600000	4281600000	4086600000	4134300000	5061600000	4037500000	4850300000	3686900000
AT1G31730.1	Adaptin family protein	23.474	8	8	100700000	118720000	118150000	119650000	130580000	109360000	122300000	91192000	77839000
AT1G31780.1	CONTAINS InterPro DOMAIN/s: Conserved oligomeric complex COG6 (InterPro:IPR010490); Has 384 Blast hits to 379 proteins in 190 species: Archae - 0; Bacteria - 4; Metazoa - 151; Fungi - 156; Plants - 42; Viruses - 0; Other Eukaryotes - 31 (source: NCBI BLin	8.0303	2	2	12018000	9141900	14637000	27263000	13277000	10789000	11217000	0	8608100
AT1G31812.1	acyl-CoA-binding protein 6	79.143	4	4	3203600000	2126700000	1951900000	1956200000	2237300000	2417200000	2659400000	2432600000	2832200000
AT1G31860.1	histidine biosynthesis bifunctional protein (HISIE)	4.4076	2	2	0	0	0	0	20081000	0	23470000	0	19991000
AT1G31910.1;AT1G31910.2	GHMP kinase family protein ; GHMP kinase family protein	41.948	10;9	10;9	178030000	158620000	176730000	174570000	189190000	198370000	146200000	168010000	158910000
AT1G32050.1	SCAMP family protein	23.346	1	1	0	0	0	0	0	0	0	23810000	0
AT1G32440.1	plastidial pyruvate kinase 3	4.8533	4	3	40394000	33971000	44025000	42209000	34500000	38496000	68188000	63791000	55582000
AT1G32490.2;AT1G32490.1	RNA helicase family protein ; RNA helicase family protein	4.844	2;2	2;2	0	0	0	0	0	0	0	0	11341000
AT1G32940.1	Subtilase family protein	2.6966	2	2	0	0	0	0	0	0	35076000	0	0
AT1G33020.1	F-box and associated interaction domains-containing protein	1.469	1	1	0	0	0	0	0	0	0	0	33267000
AT1G33140.1;AT1G33120.1	Ribosomal protein L6 family ; Ribosomal protein L6 family	242.14	10;10	7;7	3811400000	3424800000	4436500000	4390600000	4659400000	4274400000	3689700000	3976600000	3898000000
AT1G33240.1	GT-2-like 1	1.6078	1	1	0	0	0	0	0	0	0	0	6401100
AT1G33590.1	Leucine-rich repeat (LRR) family protein	4.5015	3	3	30919000	0	0	0	34175000	0	36703000	40150000	16040000
AT1G33610.1	Leucine-rich repeat (LRR) family protein	2.1823	1	1	0	0	0	0	0	0	4014400	0	3227400
AT1G33680.1	KH domain-containing protein	11.077	4	4	29983000	42183000	21831000	37664000	42775000	31360000	41749000	25581000	44194000
AT1G33750.1	Terpenoid cyclases/Protein prenyltransferases superfamily protein	1.5544	1	1	0	0	0	0	0	0	3235400	0	0
AT1G33800.1	Protein of unknown function (DUF579)	3.2772	2	1	90715000	0	0	0	0	0	0	0	0
AT1G34220.2;AT1G34220.1	Regulator of Vps4 activity in the MVB pathway protein ; Regulator of Vps4 activity in the MVB pathway protein	2.0764	2;1	2;1	0	0	0	0	0	0	0	0	28003000
AT1G34430.1	2-oxoacid dehydrogenases acyltransferase family protein	55.35	9	7	239110000	312620000	338860000	378750000	297470000	291280000	277930000	285530000	312260000
AT1G35160.1;AT1G35160.2	GF14 protein phi chain ; GF14 protein phi chain	100.64	14;12	7;5	200310000	198890000	153290000	180550000	198110000	139010000	205500000	160440000	210740000
AT1G35580.2;AT1G35580.1;AT1G35580.3	cytosolic invertase 1 ; cytosolic invertase 1 ; cytosolic invertase 1	101.92	8;8;7;2;1;1;1	7;7;6;1;0;0;0	138240000	152320000	97844000	145280000	145220000	171090000	116300000	147200000	117500000
AT1G35620.1	PDI-like 5-2	12.951	4	4	101290000	129780000	116730000	153590000	108010000	133990000	113570000	153560000	126680000
AT1G35670.1;AT4G09570.1	calcium-dependent protein kinase 2 ; calcium-dependent protein kinase 4	33.715	8;6;1;1	8;6;1;1	265440000	144360000	129900000	131990000	129770000	109950000	149460000	146220000	232340000
AT1G35720.1	annexin 1	323.31	23	23	9362700000	9291700000	8831400000	9114000000	8937400000	8247800000	9854400000	9741300000	10871000000
AT1G36050.2;AT1G36050.1	Endoplasmic reticulum vesicle transporter protein ; Endoplasmic reticulum vesicle transporter protein	6.8219	2;2	2;2	38280000	28364000	28386000	58947000	38017000	32871000	0	68415000	49222000
AT1G36160.2;AT1G36160.1	acetyl-CoA carboxylase 1 ; acetyl-CoA carboxylase 1	77.996	20;20;4;1	20;20;4;1	377630000	316170000	338770000	347890000	331850000	345930000	323890000	374930000	281480000
AT1G36310.2;AT1G36310.1	S-adenosyl-L-methionine-dependent methyltransferases superfamily protein ; S-adenosyl-L-methionine-dependent methyltransferases superfamily protein	1.2909	1;1	1;1	0	0	0	0	0	0	0	0	28868000
AT1G36730.1	Translation initiation factor IF2/IF5	2.4359	2	1	0	31136000	0	34445000	34093000	34377000	31780000	30352000	31346000
AT1G37130.1	nitrate reductase 2	9.2532	3	3	85532000	67741000	47959000	64464000	69951000	62639000	82040000	80526000	82499000
AT1G41830.1	SKU5-similar 6	75.634	9	5	613040000	740360000	665620000	580290000	603360000	613280000	631510000	723500000	666930000
AT1G41880.1;AT1G07070.1	Ribosomal protein L35Ae family protein ; Ribosomal protein L35Ae family protein	61.325	3;2	1;0	173240000	112690000	129230000	108100000	130420000	153240000	97633000	98791000	94991000
AT1G42960.1	expressed protein localized to the inner membrane of the chloroplast.	64.735	1	1	0	0	0	0	0	0	0	0	64332000
AT1G43170.9;AT1G43170.8;AT1G43170.7;AT1G43170.6;AT1G43170.5;AT1G43170.3;AT1G43170.2;AT1G43170.1;AT1G43170.4	ribosomal protein 1 ; ribosomal protein 1 ; ribosomal protein 1 ; ribosomal protein 1 ; ribosomal protein 1 ; ribosomal protein 1 ; ribosomal protein 1 ; ribosomal protein 1 ; ribosomal protein 1	184.91	18;18;18;18;18;18;18;18;16	14;14;14;14;14;14;14;14;13	3135700000	2875600000	2771800000	3106900000	3732200000	3137700000	3159400000	2847500000	3365300000
AT1G43190.3;AT1G43190.2;AT1G43190.1	polypyrimidine tract-binding protein 3 ; polypyrimidine tract-binding protein 3 ; polypyrimidine tract-binding protein 3	14.529	5;5;5	5;5;5	62362000	115670000	100450000	86295000	90736000	97163000	94944000	94345000	149750000
AT1G43670.1	Inositol monophosphatase family protein	8.2727	3	3	0	0	0	47656000	0	53828000	54948000	52691000	51101000
AT1G43690.1	ubiquitin interaction motif-containing protein	8.6787	2	2	20374000	24207000	21968000	0	19816000	29376000	18187000	18571000	20960000
AT1G43710.1	Pyridoxal phosphate (PLP)-dependent transferases superfamily protein	13.991	4	4	34713000	46788000	45334000	42683000	57674000	57615000	49569000	43717000	47198000
AT1G43890.3;AT1G43890.2;AT1G43890.1	RAB GTPASE HOMOLOG B18 ; RAB GTPASE HOMOLOG B18 ; RAB GTPASE HOMOLOG B18	24.76	5;5;5	4;4;4	85844000	145060000	96855000	126570000	175600000	139970000	134450000	125190000	153090000
AT1G44170.2;AT1G44170.1;AT1G44170.3	aldehyde dehydrogenase 3H1 ; aldehyde dehydrogenase 3H1 ; aldehyde dehydrogenase 3H1	34.059	7;7;5	7;7;5	184170000	234700000	261440000	241460000	277270000	271190000	296930000	275300000	275340000
AT1G44790.1	ChaC-like family protein	11.486	3	3	28142000	63205000	34459000	49908000	43465000	52857000	56778000	61574000	36235000
AT1G44820.1	Peptidase M20/M25/M40 family protein	17.43	5;1	5;1	46551000	78569000	61136000	57250000	58798000	55406000	71033000	84025000	63680000
AT1G44835.1;AT1G44835.2	YbaK/aminoacyl-tRNA synthetase-associated domain ; YbaK/aminoacyl-tRNA synthetase-associated domain	7.6752	5;5	5;5	92728000	105000000	89194000	85448000	79325000	121650000	91761000	91494000	96370000
AT1G45000.1;AT1G45000.2	AAA-type ATPase family protein ; AAA-type ATPase family protein	243.59	16;15	1;1	521740000	551550000	480420000	566180000	503160000	542590000	529870000	487230000	542790000
AT1G45015.2;AT1G45015.1	MD-2-related lipid recognition domain-containing protein ; MD-2-related lipid recognition domain-containing protein	1.5725	1;1	1;1	0	0	0	0	0	0	0	0	16105000
AT1G45130.1	beta-galactosidase 5	7.0032	5;2;2;2	3;0;0;0	35470000	28365000	34112000	31179000	26618000	33942000	26661000	33328000	31455000
AT1G45145.1	thioredoxin H-type 5	323.31	7	7	1322400000	847910000	1004900000	1020000000	759930000	759530000	976990000	1038700000	1196600000
AT1G45201.2;AT1G45201.1	triacylglycerol lipase-like 1 ; triacylglycerol lipase-like 1	64.577	6;6	6;6	367720000	409990000	463490000	454120000	511120000	389260000	358630000	391570000	356760000
AT1G45332.1;AT2G45030.1	Translation elongation factor EFG/EF2 protein ; Translation elongation factor EFG/EF2 protein	85.899	4;3	4;3	46684000	64860000	91399000	87396000	60880000	69401000	82255000	74395000	83461000
AT1G45688.1	unknown protein; FUNCTIONS IN: molecular_function unknown; INVOLVED IN: biological_process unknown; LOCATED IN: plasma membrane; EXPRESSED IN: 22 plant structures; EXPRESSED DURING: 13 growth stages; BEST Arabidopsis thaliana protein match is: unknown pro	1.3456	1	1	0	0	0	0	0	0	0	0	10587000
AT1G47128.1	Granulin repeat cysteine protease family protein	263.54	5	5	2962100000	3713700000	2923000000	3638800000	2146800000	2783000000	3377400000	3758900000	3592100000
AT5G43070.1;AT1G47200.1	WPP domain protein 1 ; WPP domain protein 2	12.087	1;1	1;1	0	0	0	0	0	0	0	0	71134000
AT1G47250.1	20S proteasome alpha subunit F2	60.031	9	1	79297000	0	0	0	49964000	0	64754000	94610000	0
AT1G47260.1	gamma carbonic anhydrase 2	215.7	11	8	618630000	720260000	443460000	708310000	740890000	720430000	657750000	628070000	747180000
AT1G47290.1;AT1G47290.2	3beta-hydroxysteroid-dehydrogenase/decarboxylase isoform 1 ; 3beta-hydroxysteroid-dehydrogenase/decarboxylase isoform 1	4.5311	1;1	1;1	0	0	2304700	4359700	4707900	5165000	0	2549300	1708500
AT1G47380.1	Protein phosphatase 2C family protein	1.4558	2	2	0	3781900	2809100	0	0	3483500	5211500	4321800	4593300
AT1G47420.1	succinate dehydrogenase 5	152.18	9	9	520140000	378050000	398000000	439770000	375200000	406560000	380870000	448380000	371240000
AT1G47480.1	alpha/beta-Hydrolases superfamily protein	39.73	6	6	165460000	121240000	112090000	115990000	104300000	136970000	129860000	106940000	151500000
AT1G47600.1;AT1G47600.2	beta glucosidase 34 ; beta glucosidase 34	231.07	12;11;1	5;4;0	1242900000	940430000	1122300000	1039100000	838800000	726460000	775020000	965050000	931100000
AT1G47710.1	Serine protease inhibitor (SERPIN) family protein	17.763	7	7	98222000	111450000	179000000	101530000	102300000	118100000	132700000	117280000	82762000
AT1G47750.1	peroxin 11A	3.8795	1	1	0	0	0	0	0	0	0	0	2969700
AT1G48030.2;AT1G48030.1	mitochondrial lipoamide dehydrogenase 1 ; mitochondrial lipoamide dehydrogenase 1	98.058	16;16;1	9;9;0	807270000	823290000	790950000	887670000	813160000	810560000	919270000	746700000	892810000
AT1G48160.1	signal recognition particle 19 kDa protein, putative / SRP19, putative	2.5343	1	1	0	0	0	0	0	0	0	0	7843000
AT1G48200.1	unknown protein; FUNCTIONS IN: molecular_function unknown; INVOLVED IN: biological_process unknown; LOCATED IN: endomembrane system; EXPRESSED IN: 22 plant structures; EXPRESSED DURING: 13 growth stages; Has 30 Blast hits to 30 proteins in 12 species: Arc	4.8378	1	1	0	0	0	0	0	0	0	0	12334000
AT1G48320.1	Thioesterase superfamily protein	2.8762	2	2	0	0	0	0	0	0	0	0	102390000
AT1G48410.1;AT1G48410.3;AT1G48410.2;AT5G43810.2;AT5G43810.1	Stabilizer of iron transporter SufD / Polynucleotidyl transferase ; Stabilizer of iron transporter SufD / Polynucleotidyl transferase ; Stabilizer of iron transporter SufD / Polynucleotidyl transferase ; Stabilizer of iron transporter SufD / Polynucleotid	12.268	6;6;6;3;3;1	6;6;6;3;3;1	57897000	68524000	54792000	78059000	59605000	85357000	66380000	67263000	83003000
AT1G48420.1	D-cysteine desulfhydrase	46.259	6	6	94766000	117230000	97808000	111520000	98479000	107810000	131020000	132530000	146350000
AT1G48440.1	B-cell receptor-associated 31-like	3.9959	2	2	23158000	14961000	0	18776000	14102000	25325000	20118000	16893000	19549000
AT1G48600.1;AT1G48600.2	S-adenosyl-L-methionine-dependent methyltransferases superfamily protein ; S-adenosyl-L-methionine-dependent methyltransferases superfamily protein	120.99	20;19	13;12	1060200000	980430000	1169600000	1075700000	1047900000	1001600000	1067500000	1034900000	1021400000
AT1G48620.1	high mobility group A5	14.904	6	6	126170000	117700000	110940000	107390000	84903000	99864000	141750000	135720000	146680000
AT1G48630.1	receptor for activated C kinase 1B	183.99	16	7	960190000	742930000	772940000	873120000	824230000	824700000	808740000	844550000	1026400000
AT1G48830.2;AT1G48830.1	Ribosomal protein S7e family protein ; Ribosomal protein S7e family protein	208.15	5;5	5;5	259270000	362630000	312840000	301610000	344020000	340070000	332010000	330160000	331170000
AT1G48850.1;AT1G48850.3;AT1G48850.2	chorismate synthase, putative / 5-enolpyruvylshikimate-3-phosphate phospholyase, putative ; chorismate synthase, putative / 5-enolpyruvylshikimate-3-phosphate phospholyase, putative ; chorismate synthase, putative / 5-enolpyruvylshikimate-3-phosphate phos	68.082	7;6;6	7;6;6	332950000	352550000	408990000	328240000	350070000	345750000	301720000	271570000	380940000
AT1G48860.1;AT1G48860.2	RNA 3-terminal phosphate cyclase/enolpyruvate transferase, alpha/beta ; RNA 3-terminal phosphate cyclase/enolpyruvate transferase, alpha/beta	21.575	12;11	3;3	72557000	74129000	81651000	80033000	76854000	75434000	83416000	81063000	93279000
AT1G48900.2;AT1G48900.1	Signal recognition particle, SRP54 subunit protein ; Signal recognition particle, SRP54 subunit protein	17.9	5;5;2	5;5;2	91085000	107390000	88243000	104610000	98660000	101820000	100890000	93828000	103140000
AT1G48920.1	nucleolin like 1	119.73	13	13	1186400000	1094400000	887990000	1289900000	1323500000	1192400000	1251900000	1221500000	1505100000
AT3G18780.2;AT1G49240.1;AT3G18780.1	actin 2 ; actin 8 ; actin 2	323.31	20;20;18	9;9;7	5820100000	4987300000	4683900000	5006000000	5441400000	4118300000	4657100000	4582700000	6157400000
AT1G49300.2;AT1G49300.1;AT3G18820.1	RAB GTPase homolog G3E ; RAB GTPase homolog G3E ; RAB GTPase homolog G3F	65.48	6;6;3;2;2	5;5;2;1;1	434500000	385430000	444510000	413600000	477470000	467050000	352560000	415900000	317160000
AT1G49340.2;AT1G49340.1	Phosphatidylinositol 3- and 4-kinase family protein ; Phosphatidylinositol 3- and 4-kinase family protein	4.4729	2;2	2;2	0	0	0	0	9410500	0	0	0	0
AT1G49400.1	Nucleic acid-binding, OB-fold-like protein	2.2458	2	2	0	0	0	0	0	0	0	10503000	0
AT1G49430.1	long-chain acyl-CoA synthetase 2	3.3174	3	3	0	0	0	26532000	26679000	26158000	21235000	23821000	0
AT1G49540.1;AT1G49540.2	elongator protein 2 ; elongator protein 2	1.1114	1;1	1;1	0	0	0	0	0	0	11331000	0	0
AT1G49600.1	RNA-binding protein 47A	12.261	3	2	0	43352000	59396000	53869000	38922000	64466000	51851000	46811000	30377000
AT1G49660.1	carboxyesterase 5	28.517	4	4	126970000	47516000	46588000	44582000	57573000	61659000	37881000	49174000	68416000
AT1G49670.1;AT1G49670.2	ARP protein (REF) ; ARP protein (REF)	59.436	10;10	10;10	134010000	145500000	139020000	138070000	136760000	161730000	131430000	130790000	125780000
AT1G49760.2;AT1G49760.1	poly(A) binding protein 8 ; poly(A) binding protein 8	115.36	12;12	8;8	341730000	344730000	387990000	374330000	490620000	356260000	306230000	351400000	336940000
AT1G49820.1	S-methyl-5-thioribose kinase	20.068	7	7	0	0	113530000	84856000	0	122870000	127250000	121970000	120330000
AT1G50030.2;AT1G50030.1	target of rapamycin ; target of rapamycin	1.7305	1;1	1;1	0	0	0	0	0	0	0	0	3020100
AT1G50140.2;AT1G50140.1	P-loop containing nucleoside triphosphate hydrolases superfamily protein ; P-loop containing nucleoside triphosphate hydrolases superfamily protein	2.7424	2;2	1;1	0	9071300	6426200	5408000	5353200	5642100	4211800	6909000	0
AT1G50200.2;AT1G50200.1	Alanyl-tRNA synthetase ; Alanyl-tRNA synthetase	169.18	15;15	15;15	542160000	481070000	549040000	540990000	513290000	512620000	491490000	565240000	594800000
AT5G42270.1;AT1G50250.1	FtsH extracellular protease family ; FTSH protease 1	4.3582	1;1	1;1	0	0	0	0	0	0	0	0	10411000
AT1G50370.1;AT3G19980.1	Calcineurin-like metallo-phosphoesterase superfamily protein ; flower-specific, phytochrome-associated protein phosphatase 3	11.154	3;2	3;2	62100000	0	34792000	46121000	0	61034000	53132000	48581000	66863000
AT1G50380.1	Prolyl oligopeptidase family protein	7.5119	7	7	87749000	103070000	113790000	103040000	97570000	126440000	110950000	103740000	60757000
AT1G50480.1	10-formyltetrahydrofolate synthetase	81.268	13	13	277900000	232970000	252790000	229340000	236240000	226700000	208140000	208030000	242770000
AT1G50500.1;AT1G50500.2	Membrane trafficking VPS53 family protein ; Membrane trafficking VPS53 family protein	1.5378	1;1	1;1	0	0	0	0	0	0	0	0	0
AT1G50570.2;AT1G50570.1	Calcium-dependent lipid-binding (CaLB domain) family protein ; Calcium-dependent lipid-binding (CaLB domain) family protein	2.8902	2;2	1;1	0	8379800	17575000	0	12122000	0	0	6416000	0
AT1G50670.1	OTU-like cysteine protease family protein	84.316	7	7	179440000	168470000	153570000	152930000	126370000	158730000	182090000	178730000	224470000
AT1G50940.1	electron transfer flavoprotein alpha	8.893	3	3	0	33689000	43715000	39101000	29494000	39734000	33204000	34502000	24601000
AT5G54640.1;AT4G27230.2;AT4G27230.1;AT1G51060.1;AT3G20670.1;AT1G54690.1;AT1G08880.1	Histone superfamily protein ; histone H2A 2 ; histone H2A 2 ; histone H2A 10 ; histone H2A 13 ; gamma histone variant H2AX ; Histone superfamily protein	23.489	4;4;4;4;3;3;3	3;3;3;3;2;2;2	329400000	444020000	266790000	398270000	398820000	541170000	541060000	443210000	334010000
AT1G51390.1	NFU domain protein 5	2.0871	2	2	0	0	0	0	0	0	0	0	24749000
AT1G51470.1	beta glucosidase 35	63.572	12	5	870110000	649670000	558340000	601130000	487970000	466240000	463850000	497880000	603570000
AT1G51510.1	RNA-binding (RRM/RBD/RNP motifs) family protein	2.5403	2	2	57987000	0	0	0	0	0	0	0	92923000
AT1G51580.1	RNA-binding KH domain-containing protein	3.3279	1	1	0	0	0	0	0	0	0	0	5130200
AT3G21175.3;AT3G21175.2;AT3G21175.1;AT1G51600.2;AT1G51600.1	ZIM-like 1 ; ZIM-like 1 ; ZIM-like 1 ; ZIM-LIKE 2 ; ZIM-LIKE 2	1.5212	1;1;1;1;1	1;1;1;1;1	0	0	0	0	0	0	0	0	2642900
AT1G51650.1	ATP synthase epsilon chain, mitochondrial	17.218	3	3	82495000	0	54990000	0	62662000	0	0	0	57243000
AT1G51680.1;AT1G51680.3;AT1G51680.2	4-coumarate:CoA ligase 1 ; 4-coumarate:CoA ligase 1 ; 4-coumarate:CoA ligase 1	47.541	10;9;6	9;8;5	367250000	289100000	458630000	280820000	527880000	340640000	376770000	296660000	244430000
AT1G51690.2;AT1G51690.1;AT1G51690.3	protein phosphatase 2A 55 kDa regulatory subunit B alpha isoform ; protein phosphatase 2A 55 kDa regulatory subunit B alpha isoform ; protein phosphatase 2A 55 kDa regulatory subunit B alpha isoform	5.1311	3;3;3	2;2;2	0	31022000	48425000	0	29735000	35546000	0	0	26064000
AT1G51710.1;AT1G51710.2	ubiquitin-specific protease 6 ; ubiquitin-specific protease 6	29.165	8;7;1	8;7;1	173460000	210200000	239950000	165860000	196630000	242740000	181760000	212660000	220440000
AT1G51730.1	Ubiquitin-conjugating enzyme family protein	11.211	3	3	0	103090000	99468000	96102000	78932000	100480000	114930000	108530000	93250000
AT1G51760.1	peptidase M20/M25/M40 family protein	20.729	6;2	6;2	44996000	55659000	150720000	120740000	90173000	53709000	57956000	112650000	94222000
AT1G51840.1	protein kinase-related	5.4198	2	2	56849000	94297000	66725000	54472000	85676000	88210000	64042000	75203000	83943000
AT1G51850.1	Leucine-rich repeat protein kinase family protein	1.8676	2	1	0	0	0	0	0	0	0	0	26790000
AT1G51980.1;AT1G51980.2	Insulinase (Peptidase family M16) protein ; Insulinase (Peptidase family M16) protein	323.31	22;20	15;14	1707500000	1540800000	1629700000	1671100000	2030300000	1983000000	1760600000	1590100000	1398800000
AT1G52050.1	Mannose-binding lectin superfamily protein	21.528	8	8	108540000	185820000	134160000	168000000	98171000	149180000	136740000	126270000	167150000
AT1G52070.1	Mannose-binding lectin superfamily protein	7.3352	5;2	5;2	106040000	112720000	95000000	115600000	108700000	87366000	94175000	93193000	113650000
AT1G52340.1	NAD(P)-binding Rossmann-fold superfamily protein	4.3216	3	3	0	0	0	0	0	0	27145000	0	0
AT1G52360.1;AT1G52360.2	Coatomer, beta subunit ; Coatomer, beta subunit	72.354	15;14	3;3	142730000	151510000	198010000	179870000	188670000	179640000	168300000	169820000	152270000
AT1G52370.3;AT1G52370.2;AT1G52370.1;AT4G28360.1	Ribosomal protein L22p/L17e family protein ; Ribosomal protein L22p/L17e family protein ; Ribosomal protein L22p/L17e family protein ; Ribosomal protein L22p/L17e family protein	2.7307	2;2;2;2	2;2;2;2	18057000	17444000	21418000	20406000	18607000	0	21611000	23625000	18352000
AT1G52380.1	NUP50 (Nucleoporin 50 kDa) protein	15.219	3	3	80019000	67587000	73371000	78001000	82707000	66913000	81644000	0	61272000
AT1G52400.2;AT1G52400.3;AT1G52400.1	beta glucosidase 18 ; beta glucosidase 18 ; beta glucosidase 18	3.5112	2;2;2	1;1;1	24563000	0	0	0	0	0	0	0	0
AT1G52410.1;AT1G52410.2	TSK-associating protein 1 ; TSK-associating protein 1	37.376	5;5	5;5	72835000	80471000	62612000	64406000	78856000	67196000	46639000	48791000	64047000
AT1G52570.1	phospholipase D alpha 2	48.045	9	2	306850000	293660000	1041100000	745970000	520890000	534360000	589060000	438850000	390080000
AT1G52600.1	Peptidase S24/S26A/S26B/S26C family protein	3.2567	1	1	0	0	0	0	0	0	0	0	15276000
AT1G52670.1	Single hybrid motif superfamily protein	94.606	4	4	0	145430000	177300000	144090000	165730000	226030000	120340000	115820000	120550000
AT1G52730.2;AT1G52730.1	Transducin/WD40 repeat-like superfamily protein ; Transducin/WD40 repeat-like superfamily protein	18.036	4;4;1	1;1;0	61788000	37856000	55557000	66838000	62033000	66500000	66537000	60338000	72009000
AT1G52740.1	histone H2A protein 9	11.308	5;2;2	1;0;0	71048000	111320000	60686000	82968000	71103000	81021000	67122000	57276000	56103000
AT1G52760.1	lysophospholipase 2	54.371	6	6	333460000	362040000	300110000	359770000	331750000	314540000	327260000	302250000	282340000
AT1G52780.1	Protein of unknown function (DUF2921)	1.926	1	1	0	0	0	0	0	0	8406000	0	0
AT1G52820.1	2-oxoglutarate (2OG) and Fe(II)-dependent oxygenase superfamily protein	54.514	8	8	277250000	283620000	300820000	255660000	263580000	387340000	239060000	343820000	311200000
AT1G53000.1	Nucleotide-diphospho-sugar transferases superfamily protein	1.2109	1	1	0	0	0	0	0	0	0	0	14859000
AT1G53070.1	Legume lectin family protein	6.2602	2	2	73597000	92137000	89291000	85075000	67556000	65567000	58647000	86437000	71218000
AT1G53210.1	sodium/calcium exchanger family protein / calcium-binding EF hand family protein	78.863	3	3	75017000	86755000	50744000	107350000	101000000	80744000	69953000	71909000	87041000
AT1G53240.1	Lactate/malate dehydrogenase family protein	79.19	14	5	2735000000	2138500000	2176400000	2443500000	2756400000	2511000000	2672600000	2369700000	2317500000
AT1G53280.1	Class I glutamine amidotransferase-like superfamily protein	80.852	9	9	318680000	383030000	496680000	470830000	389870000	416530000	466130000	516270000	367790000
AT1G53310.3;AT1G53310.2;AT1G53310.1	phosphoenolpyruvate carboxylase 1 ; phosphoenolpyruvate carboxylase 1 ; phosphoenolpyruvate carboxylase 1	323.31	51;51;51	22;22;22	6636200000	5919500000	7122400000	6552100000	6310600000	6125500000	6354600000	6373600000	5951000000
AT3G14840.2;AT1G53440.1	Leucine-rich repeat transmembrane protein kinase ; Leucine-rich repeat transmembrane protein kinase	1.9113	1;1	1;1	0	0	0	0	0	0	0	0	5608100
AT1G53500.1	NAD-dependent epimerase/dehydratase family protein	10.104	18	6	317440000	196370000	205660000	156140000	201550000	132040000	211830000	177530000	232110000
AT1G53580.1;AT1G53580.2	glyoxalase II 3 ; glyoxalase II 3	230.55	11;10	11;10	1378000000	1206900000	853420000	1224800000	890720000	1100800000	1185700000	1146700000	1341900000
AT1G53645.1	hydroxyproline-rich glycoprotein family protein	2.5411	1	1	0	0	0	0	0	0	0	25530000	0
AT1G53750.1	regulatory particle triple-A 1A	99.354	17;3;3;3	17;3;3;3	330550000	357250000	350800000	384110000	506480000	338910000	337470000	302030000	475750000
AT1G53830.1	pectin methylesterase 2	64.096	6	4	144830000	153900000	86350000	134240000	111870000	115100000	127670000	111430000	134140000
AT1G53850.2;AT1G53850.1	20S proteasome alpha subunit E1 ; 20S proteasome alpha subunit E1	323.31	10;10	2;2	789330000	566250000	633780000	583460000	552470000	508160000	653320000	645290000	763120000
AT1G54000.1	GDSL-like Lipase/Acylhydrolase superfamily protein	323.31	14;1	13;1	3817400000	3108100000	2688200000	2816200000	3081200000	2899300000	2501300000	2841600000	3011000000
AT1G54010.1	GDSL-like Lipase/Acylhydrolase superfamily protein	323.31	12	11	919580000	856260000	708870000	606880000	658110000	747240000	524240000	614650000	570220000
AT1G54030.1	GDSL-like Lipase/Acylhydrolase superfamily protein	16.821	5	5	0	91741000	92699000	81484000	69993000	0	59222000	0	78378000
AT1G54080.1;AT1G54080.2	oligouridylate-binding protein 1A ; oligouridylate-binding protein 1A	6.2558	3;3	1;1	0	0	0	0	0	0	0	0	7660900
AT1G54100.2;AT1G54100.1	aldehyde dehydrogenase 7B4 ; aldehyde dehydrogenase 7B4	323.31	19;19	19;19	1063600000	1047000000	1037800000	1044800000	885600000	1016200000	1119900000	1078600000	1065100000
AT1G54220.2;AT1G54220.1	Dihydrolipoamide acetyltransferase, long form protein ; Dihydrolipoamide acetyltransferase, long form protein	1.185	4;4	1;1	0	0	0	0	0	0	0	12953000	0
AT1G54270.1;AT1G54270.2	eif4a-2 ; eif4a-2	128.46	25;24	6;6	250060000	324370000	541120000	305130000	330730000	369190000	220160000	200490000	183800000
AT5G54760.3;AT5G54760.2;AT5G54760.1;AT4G27130.1;AT1G54290.1;AT5G54940.2;AT5G54940.1	Translation initiation factor SUI1 family protein ; Translation initiation factor SUI1 family protein ; Translation initiation factor SUI1 family protein ; Translation initiation factor SUI1 family protein ; Translation initiation factor SUI1 family prote	5.7848	2;2;2;2;2;1;1	2;2;2;2;2;1;1	0	0	280950000	225330000	0	224560000	208240000	227660000	218230000
AT1G54340.1	isocitrate dehydrogenase	8.9008	8	4	41188000	0	67880000	76819000	81254000	0	65380000	56789000	25350000
AT1G54570.1	Esterase/lipase/thioesterase family protein	2.5141	1	1	0	0	0	0	0	0	0	0	786460
AT1G54580.1	acyl carrier protein 2	292.08	2	1	676510000	550880000	566000000	452680000	511760000	646350000	620300000	832790000	265640000
AT1G54630.1;AT1G54630.2	acyl carrier protein 3 ; acyl carrier protein 3	134.23	2;1	1;0	72828000	415430000	369510000	200560000	278050000	479310000	296660000	323240000	153890000
AT1G54790.1;AT1G54790.3;AT1G54790.2	GDSL-like Lipase/Acylhydrolase superfamily protein ; GDSL-like Lipase/Acylhydrolase superfamily protein ; GDSL-like Lipase/Acylhydrolase superfamily protein	2.4164	1;1;1	1;1;1	0	0	0	0	0	0	0	0	3943400
AT1G54990.1	alpha/beta-Hydrolases superfamily protein	3.8008	1	1	0	0	0	0	0	0	0	0	4846800
AT1G55020.1	lipoxygenase 1	244.1	23	23	945600000	579030000	724750000	577230000	614980000	674180000	555080000	690210000	599480000
AT1G55210.2;AT1G55210.1	Disease resistance-responsive (dirigent-like protein) family protein ; Disease resistance-responsive (dirigent-like protein) family protein	1.7007	1;1	1;1	0	0	0	0	0	0	0	0	25700000
AT1G55450.1;AT1G55450.2	S-adenosyl-L-methionine-dependent methyltransferases superfamily protein ; S-adenosyl-L-methionine-dependent methyltransferases superfamily protein	2.1482	1;1	1;1	0	0	0	0	0	0	0	0	8051800
AT1G55490.2;AT1G55490.1	chaperonin 60 beta ; chaperonin 60 beta	100.14	15;15	2;2	539900000	692290000	620110000	661760000	672710000	668160000	678950000	661510000	653940000
AT1G55805.1	BolA-like family protein	2.1992	1	1	0	0	0	0	0	0	0	16515000	0
AT1G55850.1	cellulose synthase like E1	24.605	3	3	34475000	35435000	28460000	36898000	33047000	28457000	29169000	36250000	30829000
AT1G55890.1	Tetratricopeptide repeat (TPR)-like superfamily protein	24.606	7	7	68596000	54178000	72183000	97986000	79237000	91300000	69529000	69941000	64212000
AT1G56030.1	RING/U-box superfamily protein	1.1063	1	1	23488000	0	0	0	0	0	0	0	0
AT1G56070.1	Ribosomal protein S5/Elongation factor G/III/V family protein	323.31	47	32	14650000000	12768000000	15944000000	13807000000	14582000000	13947000000	13167000000	12527000000	13398000000
AT1G56110.1;AT3G12860.1	homolog of nucleolar protein NOP56 ; NOP56-like pre RNA processing ribonucleoprotein	63.132	14;7	14;7	353280000	394780000	508870000	407140000	590440000	431050000	373160000	390810000	313430000
AT1G56145.1;AT1G56145.2;AT1G56130.1;AT1G56140.1;AT1G56120.1	Leucine-rich repeat transmembrane protein kinase ; Leucine-rich repeat transmembrane protein kinase ; Leucine-rich repeat transmembrane protein kinase ; Leucine-rich repeat transmembrane protein kinase ; Leucine-rich repeat transmembrane protein kinase	1.5233	2;2;1;1;1	2;2;1;1;1	0	0	0	0	0	0	0	0	26197000
AT1G56190.2;AT1G56190.1	Phosphoglycerate kinase family protein ; Phosphoglycerate kinase family protein	12.014	16;16	5;5	166580000	175090000	204510000	179850000	152270000	190830000	155050000	193590000	164080000
AT1G56330.1	secretion-associated RAS 1B	59.305	9;4;1	3;0;0	501140000	789070000	722320000	641960000	651670000	749920000	718290000	688850000	665150000
AT1G56340.1;AT1G56340.2	calreticulin 1a ; calreticulin 1a	146.27	17;16	10;9	1286100000	1211500000	1346000000	1197000000	1345100000	1196900000	1435700000	1113200000	1534100000
AT1G56450.1	20S proteasome beta subunit G1	323.31	8	8	781740000	606630000	889220000	748190000	700530000	695800000	703800000	622620000	603550000
AT1G56550.1	RhamnoGalacturonan speci&#64257;c Xylosyltransferase 1	6.1262	1	1	0	0	0	0	0	0	0	0	22290000
AT1G56560.1	Plant neutral invertase family protein	4.4843	1	1	0	0	0	0	0	0	0	0	13754000
AT1G56700.2;AT1G56700.1;AT1G56700.3	Peptidase C15, pyroglutamyl peptidase I-like ; Peptidase C15, pyroglutamyl peptidase I-like ; Peptidase C15, pyroglutamyl peptidase I-like	150.82	8;8;7	7;7;6	279220000	316680000	360390000	290420000	263360000	340140000	302940000	361050000	246900000
AT1G57620.1	emp24/gp25L/p24 family/GOLD family protein	3.5016	2	2	35179000	38034000	35167000	38178000	0	38547000	34697000	0	31023000
AT1G57720.2;AT1G57720.1	Translation elongation factor EF1B, gamma chain ; Translation elongation factor EF1B, gamma chain	196	16;16	8;8	2534300000	2057900000	2182600000	2270000000	2057600000	2214200000	1958800000	2213500000	2282400000
AT1G57850.1;AT1G57850.2	Toll-Interleukin-Resistance (TIR) domain family protein ; Toll-Interleukin-Resistance (TIR) domain family protein	1.7143	2;1	2;1	0	0	0	0	0	247310000	207420000	221430000	0
AT1G58080.1	ATP phosphoribosyl transferase 1	28.867	3	3	0	0	38219000	38865000	42190000	41030000	41543000	52566000	32958000
AT1G58270.1	TRAF-like family protein	323.31	11	11	4084900000	4249700000	3124500000	4335100000	3409700000	3492900000	3320500000	3269000000	3661800000
AT1G58280.4;AT1G58280.3;AT1G58280.1;AT1G58280.2	Phosphoglycerate mutase family protein ; Phosphoglycerate mutase family protein ; Phosphoglycerate mutase family protein ; Phosphoglycerate mutase family protein	2.808	2;2;2;2	2;2;2;2	38247000	0	0	0	0	0	0	0	34850000
AT1G59359.1;AT1G58983.1;AT1G58684.1;AT1G58380.1	Ribosomal protein S5 family protein ; Ribosomal protein S5 family protein ; Ribosomal protein S5 family protein ; Ribosomal protein S5 family protein	32.092	7;7;7;7;3	3;3;3;3;0	358180000	386960000	377170000	454830000	401830000	434550000	385460000	371680000	349020000
AT1G59580.2;AT1G59580.1;AT2G18170.1;AT1G10210.2;AT1G10210.1	mitogen-activated protein kinase homolog 2 ; mitogen-activated protein kinase homolog 2 ; MAP kinase 7 ; mitogen-activated protein kinase 1 ; mitogen-activated protein kinase 1	2.5469	2;2;1;1;1	2;2;1;1;1	0	0	0	0	0	0	0	15012000	0
AT1G59610.1	dynamin-like 3	4.9988	15	2	0	0	0	0	0	0	0	0	31847000
AT1G59870.1	ABC-2 and Plant PDR ABC-type transporter family protein	99.11	15;4;3;1	7;1;1;0	517270000	585300000	413980000	597700000	520680000	614470000	540160000	519490000	429970000
AT1G59900.1	pyruvate dehydrogenase complex E1 alpha subunit	25.827	7	4	119790000	88896000	117330000	97976000	120910000	131240000	105980000	93286000	101970000
AT1G59950.1	NAD(P)-linked oxidoreductase superfamily protein	4.6076	1	1	40728000	0	51409000	31694000	35680000	0	0	0	34057000
AT1G59960.1	NAD(P)-linked oxidoreductase superfamily protein	33.94	5	5	107160000	87513000	109220000	88961000	108100000	119010000	85663000	96164000	77206000
AT1G60070.1;AT1G60070.2	Adaptor protein complex AP-1, gamma subunit ; Adaptor protein complex AP-1, gamma subunit	1.7262	2;2	2;2	0	0	0	0	0	0	0	0	26360000
AT1G60420.1	DC1 domain-containing protein	49.096	7	7	197350000	165390000	193350000	167940000	167970000	188280000	160990000	171130000	167240000
AT1G60680.1	NAD(P)-linked oxidoreductase superfamily protein	1.9016	5	1	0	0	0	0	0	0	0	0	6499800
AT1G60710.1	NAD(P)-linked oxidoreductase superfamily protein	29.951	11;2	7;0	933550000	792920000	1059100000	870500000	816380000	808440000	858300000	935580000	892010000
AT1G60730.1;AT1G60730.3;AT1G60730.2	NAD(P)-linked oxidoreductase superfamily protein ; NAD(P)-linked oxidoreductase superfamily protein ; NAD(P)-linked oxidoreductase superfamily protein	7.6203	7;6;4	4;3;2	35791000	45028000	54538000	58809000	42489000	45923000	46474000	49079000	32582000
AT1G65970.1;AT1G60740.1	thioredoxin-dependent peroxidase 2 ; Thioredoxin superfamily protein	135.04	5;5	4;4	325610000	269510000	274210000	249780000	192350000	225230000	255860000	236730000	191230000
AT1G60770.1	Tetratricopeptide repeat (TPR)-like superfamily protein	2.288	1	1	0	0	0	0	0	0	0	0	26097000
AT1G60780.1	Clathrin adaptor complexes medium subunit family protein	8.9309	3;1	3;1	22965000	0	0	0	40436000	54511000	43534000	34585000	0
AT1G60810.1	ATP-citrate lyase A-2	22.382	5	2	0	76093000	78712000	73502000	0	83692000	67272000	0	0
AT1G61150.7;AT1G61150.3;AT1G61150.5;AT1G61150.6;AT1G61150.4;AT1G61150.2;AT1G61150.1	LisH and RanBPM domains containing protein ; LisH and RanBPM domains containing protein ; LisH and RanBPM domains containing protein ; LisH and RanBPM domains containing protein ; LisH and RanBPM domains containing protein ; LisH and RanBPM domains contai	51.603	3;3;3;3;3;3;3	3;3;3;3;3;3;3	56253000	63213000	49704000	63811000	57019000	69092000	68518000	63551000	76631000
AT1G61570.1	translocase of the inner mitochondrial membrane 13	20.632	3	3	143950000	105250000	104500000	125310000	36804000	34204000	121330000	145000000	131260000
AT1G61580.1	R-protein L3 B	3.7309	5	1	0	0	0	0	0	0	0	0	12332000
AT1G61730.1	DNA-binding storekeeper protein-related transcriptional regulator	1.3641	1	1	0	0	0	0	0	0	0	0	14056000
AT1G61790.1	Oligosaccharyltransferase complex/magnesium transporter family protein	14.712	6	6	226140000	135660000	153140000	164930000	183870000	195220000	124380000	155350000	171870000
AT5G54800.1;AT1G61800.1	glucose 6-phosphate/phosphate translocator 1 ; glucose-6-phosphate/phosphate translocator 2	1.1135	1;1	1;1	0	0	0	0	0	0	0	0	20305000
AT1G61870.1	pentatricopeptide repeat 336	10.219	5	5	64424000	0	74257000	91435000	64192000	79671000	69776000	73157000	72460000
AT1G62020.1	Coatomer, alpha subunit	39.497	27	9	259840000	207390000	204800000	236110000	233650000	211570000	198630000	261990000	190730000
AT1G62040.1;AT2G05630.1;AT4G21980.1;AT1G62040.2;AT4G21980.2;AT2G05630.2	Ubiquitin-like superfamily protein ; Ubiquitin-like superfamily protein ; Ubiquitin-like superfamily protein ; Ubiquitin-like superfamily protein ; Ubiquitin-like superfamily protein ; Ubiquitin-like superfamily protein	2.5324	1;1;1;1;1;1	1;1;1;1;1;1	0	0	0	0	0	0	0	0	9870800
AT1G62380.1	ACC oxidase 2	135.33	9	8	240330000	340400000	350020000	349620000	329960000	318320000	346110000	288490000	259600000
AT1G62390.1	Octicosapeptide/Phox/Bem1p (PB1) domain-containing protein / tetratricopeptide repeat (TPR)-containing protein	69.308	6	6	126560000	101150000	119980000	102830000	121670000	143860000	106130000	106400000	70743000
AT1G62480.1	Vacuolar calcium-binding protein-related	323.31	7	7	1365700000	1593300000	1217500000	912340000	1011900000	1678700000	591410000	488430000	509330000
AT1G62570.1	flavin-monooxygenase glucosinolate S-oxygenase 4	5.5093	3	2	0	65097000	0	0	0	50845000	0	0	69345000
AT1G62600.1	Flavin-binding monooxygenase family protein	4.9267	3;1	3;1	0	0	0	0	0	0	9478500	0	0
AT1G62640.2;AT1G62640.1	3-ketoacyl-acyl carrier protein synthase III ; 3-ketoacyl-acyl carrier protein synthase III	106.1	6;6	6;6	159660000	192840000	204060000	133040000	176300000	195560000	161620000	144170000	139000000
AT1G62660.1	Glycosyl hydrolases family 32 protein	323.31	19;1	16;1	4070500000	3653500000	3255100000	3481500000	3040400000	3011700000	3559500000	2846900000	3490700000
AT1G62740.1	stress-inducible protein, putative	48.289	13	13	394440000	294150000	264240000	332030000	323950000	277630000	324450000	362100000	359880000
AT1G62750.1	Translation elongation factor EFG/EF2 protein	1.9801	2	2	0	0	0	0	16461000	0	0	0	0
AT1G62800.1;AT1G62800.2	aspartate aminotransferase 4 ; aspartate aminotransferase 4	22.976	10;10	8;8	37710000	52088000	73968000	66128000	31424000	0	65437000	74109000	70298000
AT1G62820.1	Calcium-binding EF-hand family protein	10.195	8	2	46303000	0	0	42533000	51751000	39704000	44514000	0	42669000
AT1G63000.1	nucleotide-rhamnose synthase/epimerase-reductase	323.31	16	14	1766200000	1940900000	2245600000	1951500000	1588900000	1931500000	1601500000	1682000000	2078100000
AT1G63220.1;AT1G63220.2	Calcium-dependent lipid-binding (CaLB domain) family protein ; Calcium-dependent lipid-binding (CaLB domain) family protein	30.306	3;2	3;2	90005000	81960000	130530000	93608000	81767000	118230000	84469000	111730000	87787000
AT1G63290.1	Aldolase-type TIM barrel family protein	7.2427	3	3	0	0	0	47267000	38179000	0	34051000	39718000	32450000
AT1G63460.1	glutathione peroxidase 8	14.742	5;1	4;0	133420000	118840000	112880000	103870000	110660000	125940000	121190000	135520000	125430000
AT1G63500.1;AT1G01740.2;AT1G01740.1	Protein kinase protein with tetratricopeptide repeat domain ; Protein kinase protein with tetratricopeptide repeat domain ; Protein kinase protein with tetratricopeptide repeat domain	1.2555	4;2;2;1;1;1;1	2;0;0;0;0;0;0	18957000	20635000	11137000	0	13721000	24442000	14329000	16492000	13406000
AT1G63660.1;AT1G63660.2	GMP synthase (glutamine-hydrolyzing), putative / glutamine amidotransferase, putative ; GMP synthase (glutamine-hydrolyzing), putative / glutamine amidotransferase, putative	136.06	15;12	15;12	198360000	243400000	268080000	211010000	268630000	230220000	209970000	210550000	245080000
AT1G63770.4;AT1G63770.3;AT1G63770.2;AT1G63770.5;AT1G63770.1	Peptidase M1 family protein ; Peptidase M1 family protein ; Peptidase M1 family protein ; Peptidase M1 family protein ; Peptidase M1 family protein	323.31	31;31;30;30;28	31;31;30;30;28	1411000000	1343900000	1517100000	1338700000	1328100000	1568100000	1320700000	1580800000	1522400000
AT1G63940.1;AT1G63940.2;AT1G63940.4;AT1G63940.3	monodehydroascorbate reductase 6 ; monodehydroascorbate reductase 6 ; monodehydroascorbate reductase 6 ; monodehydroascorbate reductase 6	323.31	23;23;22;20	23;23;22;20	2728400000	2321100000	2379100000	2435400000	2670100000	2539300000	2692500000	2706400000	2793400000
AT1G64090.1;AT5G41600.1;AT1G64090.2	Reticulan like protein B3 ; VIRB2-interacting protein 3 ; Reticulan like protein B3	4.0717	2;1;1	2;1;1	0	0	0	0	0	0	0	0	78116000
AT1G64190.1	6-phosphogluconate dehydrogenase family protein	69.675	20	8	571990000	545520000	462970000	388030000	529870000	602020000	512540000	409710000	335610000
AT1G64200.1	vacuolar H+-ATPase subunit E isoform 3	3.7727	8	2	0	52855000	51095000	53555000	56211000	39672000	0	0	60426000
AT1G64330.1	myosin heavy chain-related	21.298	6	5	70451000	72046000	61542000	93584000	60866000	81878000	97115000	77723000	94466000
AT1G64350.1	Transducin/WD40 repeat-like superfamily protein	30.638	1	1	0	0	0	0	0	0	0	0	4222700
AT1G64440.1	NAD(P)-binding Rossmann-fold superfamily protein	5.2574	5	5	0	0	0	43494000	0	0	0	0	52953000
AT1G64520.1	regulatory particle non-ATPase 12A	196	11;2	11;2	588470000	672220000	803060000	664340000	714710000	771710000	732330000	823710000	796300000
AT1G64550.1	general control non-repressible 3	29.999	8	8	87775000	66456000	85897000	76086000	83298000	0	64704000	62307000	79266000
AT1G64790.1;AT1G64790.2	ILITYHIA ; ILITYHIA	43.896	20;19	20;19	74677000	126330000	119480000	132420000	128770000	163250000	98982000	96358000	73764000
AT1G64950.1	cytochrome P450, family 89, subfamily A, polypeptide 5	2.5348	1	1	0	0	0	0	0	0	0	0	6509200
AT1G64980.1	Nucleotide-diphospho-sugar transferases superfamily protein	1.8706	2	2	0	0	0	0	0	0	25868000	0	0
AT1G65010.1	Plant protein of unknown function (DUF827)	8.9748	6	6	18832000	0	22886000	38171000	37276000	36633000	48088000	33140000	48283000
AT1G65020.1	FUNCTIONS IN: molecular_function unknown; INVOLVED IN: biological_process unknown; LOCATED IN: endoplasmic reticulum, plasma membrane; EXPRESSED IN: 23 plant structures; EXPRESSED DURING: 13 growth stages; CONTAINS InterPro DOMAIN/s: NERD (InterPro:IPR011	2.1029	2	2	23962000	14897000	41139000	29639000	0	35086000	30531000	33841000	23088000
AT1G65220.1	ARM repeat superfamily protein	4.5635	6	2	0	0	0	0	0	0	0	0	22053000
AT1G65270.3;AT1G65270.2;AT1G65270.1	unknown protein; FUNCTIONS IN: molecular_function unknown; INVOLVED IN: biological_process unknown; LOCATED IN: endoplasmic reticulum, plasma membrane; EXPRESSED IN: 24 plant structures; EXPRESSED DURING: 13 growth stages; Has 35333 Blast hits to 34131 pr	19.492	2;2;2	2;2;2	111570000	114840000	116910000	101480000	0	0	100030000	0	83327000
AT1G65290.1	mitochondrial acyl carrier protein 2	41.461	1	1	321630000	578470000	660560000	661960000	493600000	615170000	650670000	948640000	418430000
AT4G30280.1;AT1G65310.1	xyloglucan endotransglucosylase/hydrolase 18 ; xyloglucan endotransglucosylase/hydrolase 17	1.9756	6;6;1	2;2;0	18381000	0	18186000	15226000	0	29968000	0	0	0
AT1G65440.3;AT1G65440.2;AT1G65440.1	global transcription factor group B1 ; global transcription factor group B1 ; global transcription factor group B1	2.6918	3;3;3	2;2;2	15075000	18116000	18483000	23508000	23856000	23615000	22047000	14587000	16384000
AT1G65540.1	LETM1-like protein	4.3197	3	2	0	37321000	0	36356000	0	40919000	37650000	0	0
AT1G65570.1	Pectin lyase-like superfamily protein	10.406	3	3	80524000	113100000	86228000	96037000	65907000	81154000	64244000	60564000	85356000
AT1G65590.1	beta-hexosaminidase 3	51.352	8	8	155390000	145560000	177100000	96587000	107990000	108710000	89643000	122490000	151520000
AT1G65650.1	Peptidase C12, ubiquitin carboxyl-terminal hydrolase 1	35.896	4	4	48016000	67109000	74320000	63099000	63777000	62157000	56918000	57124000	32956000
AT1G65700.2;AT1G65700.1;AT1G65700.3	Small nuclear ribonucleoprotein family protein ; Small nuclear ribonucleoprotein family protein ; Small nuclear ribonucleoprotein family protein	9.7677	2;2;2	2;2;2	27632000	42153000	63300000	49970000	43383000	43454000	48639000	56885000	44987000
AT1G65820.1;AT1G65820.3;AT1G65820.2	microsomal glutathione s-transferase, putative ; microsomal glutathione s-transferase, putative ; microsomal glutathione s-transferase, putative	4.0775	2;2;1	2;2;1	0	0	0	0	0	0	0	66093000	0
AT1G65930.1	cytosolic NADP+-dependent isocitrate dehydrogenase	323.31	24	20	9142500000	8416300000	8433900000	8409800000	8866200000	8477200000	8657900000	9233600000	10283000000
AT1G65960.2;AT1G65960.1	glutamate decarboxylase 2 ; glutamate decarboxylase 2	38.94	15;10	11;8	246790000	216400000	288600000	249460000	263570000	301790000	248730000	246560000	247800000
AT1G65980.1	thioredoxin-dependent peroxidase 1	246.76	7;3	6;3	1830400000	1734600000	1642400000	1583400000	1439100000	1695600000	1408600000	1565500000	1341800000
AT1G66070.2;AT1G66070.1	Translation initiation factor eIF3 subunit ; Translation initiation factor eIF3 subunit	2.7875	1;1	1;1	0	0	0	0	0	0	0	0	15769000
AT1G66180.1	Eukaryotic aspartyl protease family protein	2.7879	1	1	0	0	0	0	0	0	0	10917000	0
AT1G66200.1;AT1G66200.3;AT1G66200.2	glutamine synthase clone F11 ; glutamine synthase clone F11 ; glutamine synthase clone F11	323.31	22;20;13;1	9;9;6;0	8375400000	7477700000	8492800000	7579700000	8709600000	9486600000	8900700000	9352100000	7288800000
AT1G66240.1;AT1G66240.2	homolog of anti-oxidant 1 ; homolog of anti-oxidant 1	34.293	4;3	4;3	1077300000	986110000	866460000	1022000000	864910000	1142400000	1077600000	992870000	1324500000
AT2G01630.2;AT2G01630.1;AT1G66250.1	O-Glycosyl hydrolases family 17 protein ; O-Glycosyl hydrolases family 17 protein ; O-Glycosyl hydrolases family 17 protein	1.6838	1;1;1	1;1;1	0	0	0	0	0	0	0	0	9311300
AT1G66260.2;AT1G66260.1	RNA-binding (RRM/RBD/RNP motifs) family protein ; RNA-binding (RRM/RBD/RNP motifs) family protein	13.212	3;3	3;3	0	0	0	0	0	0	0	0	56376000
AT1G66270.1;AT1G66270.2	Glycosyl hydrolase superfamily protein ; Glycosyl hydrolase superfamily protein	323.31	24;23;1	12;11;0	6495600000	5974400000	6953100000	5275400000	5220300000	6753300000	5012700000	5418000000	5763600000
AT1G66280.1	Glycosyl hydrolase superfamily protein	323.31	25	16	10139000000	7955600000	8600200000	7774100000	6766500000	7147100000	7368300000	6971000000	8235000000
AT5G37780.1;AT1G66410.1;AT1G66410.2;AT5G37780.2;AT5G37780.3	calmodulin 1 ; calmodulin 4 ; calmodulin 4 ; calmodulin 1 ; calmodulin 1	22.459	7;7;7;7;7;1;1;1;1	2;2;2;2;2;0;0;0;0	0	0	160800000	0	0	156570000	0	42059000	0
AT1G66430.1	pfkB-like carbohydrate kinase family protein	5.1753	4	4	0	0	11620000	0	0	0	0	0	0
AT1G66530.1	Arginyl-tRNA synthetase, class Ic	6.9461	9	5	0	0	49353000	40621000	39027000	35622000	51014000	38380000	37837000
AT1G66580.1;AT1G26910.1	senescence associated gene 24 ; Ribosomal protein L16p/L10e family protein	-2	7;4	2;0	0	0	0	0	2662600	0	11646000	4584200	0
AT1G66680.1	S-adenosyl-L-methionine-dependent methyltransferases superfamily protein	28.584	5	5	71327000	59495000	63555000	72620000	70400000	78487000	65769000	81282000	83261000
AT1G66830.1	Leucine-rich repeat protein kinase family protein	1.2181	1	1	0	0	0	0	0	0	0	0	7346700
AT1G67230.1	little nuclei1	9.9746	6	6	75903000	103930000	100470000	91833000	109040000	85656000	104200000	104500000	104230000
AT1G67280.2;AT1G67280.1	Glyoxalase/Bleomycin resistance protein/Dioxygenase superfamily protein ; Glyoxalase/Bleomycin resistance protein/Dioxygenase superfamily protein	1.3686	3;3	2;2	0	0	0	0	0	0	41783000	0	0
AT1G67330.1	Protein of unknown function (DUF579)	5.3037	4	4	37750000	35268000	28504000	37249000	40897000	33978000	31986000	40701000	38086000
AT1G67350.2;AT1G67350.1	unknown protein; FUNCTIONS IN: molecular_function unknown; INVOLVED IN: photorespiration; LOCATED IN: mitochondrial membrane, mitochondrial respiratory chain complex I, respiratory chain complex I; EXPRESSED IN: 24 plant structures; EXPRESSED DURING: 15 g	7.4966	2;2	2;2	0	21246000	23587000	21405000	0	25923000	20479000	22460000	16228000
AT1G67360.2;AT1G67360.1	Rubber elongation factor protein (REF) ; Rubber elongation factor protein (REF)	1.762	1;1	1;1	0	0	0	0	0	0	0	0	17846000
AT1G67550.1	urease	3.8341	3	3	0	0	0	28129000	0	0	0	0	28223000
AT1G67680.1	SRP72 RNA-binding domain	24.778	7;2	7;2	87197000	123590000	69016000	108630000	105690000	94382000	127650000	100290000	153220000
AT1G67730.1	beta-ketoacyl reductase 1	44.34	7	7	230420000	247050000	281070000	306150000	308140000	318570000	180490000	234860000	196220000
AT1G67785.1	unknown protein; Has 30 Blast hits to 30 proteins in 12 species: Archae - 0; Bacteria - 0; Metazoa - 0; Fungi - 0; Plants - 30; Viruses - 0; Other Eukaryotes - 0 (source: NCBI BLink).	14.782	1	1	41714000	70695000	80160000	101010000	52582000	66623000	0	93333000	0
AT1G68300.1	Adenine nucleotide alpha hydrolases-like superfamily protein	3.7232	2	2	0	0	0	0	0	0	0	0	66593000
AT1G68560.1	alpha-xylosidase 1	267.18	19;3	19;3	1070000000	1045400000	1119900000	966170000	956880000	919140000	898060000	1115000000	974370000
AT1G68680.1	unknown protein; FUNCTIONS IN: molecular_function unknown; INVOLVED IN: biological_process unknown; LOCATED IN: chloroplast; EXPRESSED IN: 23 plant structures; EXPRESSED DURING: 16 growth stages; Has 20 Blast hits to 20 proteins in 11 species: Archae - 0;	1.9283	1	1	0	0	0	0	0	0	0	0	5402000
AT1G68760.1	nudix hydrolase 1	1.6962	1	1	0	0	36508000	0	0	0	43885000	0	0
AT1G68790.1	little nuclei3	1.3063	1	1	0	0	0	0	0	0	0	4983200	0
AT1G68910.3;AT1G68910.2;AT1G68910.1	WPP domain-interacting protein 2 ; WPP domain-interacting protein 2 ; WPP domain-interacting protein 2	12.229	2;2;2	2;2;2	0	0	0	0	0	0	11211000	10109000	8897700
AT1G69010.1	BES1-interacting Myc-like protein 2	1.1263	1	1	0	0	0	0	0	0	0	0	0
AT1G69030.1	BSD domain-containing protein	1.5716	1	1	0	0	0	0	0	0	0	0	11483000
AT1G69210.2;AT1G69210.1	Uncharacterised protein family UPF0090 ; Uncharacterised protein family UPF0090	1.4821	1;1	1;1	0	0	0	0	0	0	0	0	4596200
AT1G69250.2;AT1G69250.1	Nuclear transport factor 2 (NTF2) family protein with RNA binding (RRM-RBD-RNP motifs) domain ; Nuclear transport factor 2 (NTF2) family protein with RNA binding (RRM-RBD-RNP motifs) domain	1.1816	1;1	1;1	0	0	0	0	0	0	0	0	20277000
AT1G69410.1	eukaryotic elongation factor 5A-3	23.674	5	3	164250000	160500000	170620000	145990000	236770000	133610000	201850000	124600000	126480000
AT1G69460.1	emp24/gp25L/p24 family/GOLD family protein	2.7611	2	2	0	0	0	0	22518000	0	0	20027000	0
AT1G69510.3;AT1G69510.2;AT1G69510.1	cAMP-regulated phosphoprotein 19-related protein ; cAMP-regulated phosphoprotein 19-related protein ; cAMP-regulated phosphoprotein 19-related protein	2.8971	1;1;1	1;1;1	0	0	0	0	0	0	0	0	19856000
AT1G69620.1	ribosomal protein L34	1.7194	4	1	89083000	117280000	0	107300000	145040000	0	135430000	169310000	164060000
AT1G69670.1;AT1G26830.1	cullin 3B ; cullin 3	2.8893	2;1	2;1	0	35304000	0	36024000	19831000	33024000	0	34014000	33061000
AT1G69740.2;AT1G69740.1	Aldolase superfamily protein ; Aldolase superfamily protein	17.893	3;3	3;3	0	0	0	0	0	54024000	40933000	0	45257000
AT1G69800.1;AT1G69800.2	Cystathionine beta-synthase (CBS) protein ; Cystathionine beta-synthase (CBS) protein	3.5754	1;1	1;1	0	0	0	0	0	0	0	0	14490000
AT1G70310.1	spermidine synthase 2	249.65	15	11	790550000	876520000	982510000	862890000	861470000	957810000	765150000	980360000	726840000
AT1G70320.1;AT1G55860.2;AT1G55860.1	ubiquitin-protein ligase 2 ; ubiquitin-protein ligase 1 ; ubiquitin-protein ligase 1	24.833	14;11;11	14;11;11	70731000	75778000	72318000	86713000	95866000	93257000	94093000	85615000	68697000
AT1G70330.1	equilibrative nucleotide transporter 1	4.7185	1	1	0	0	0	0	0	0	0	0	16398000
AT1G70410.3;AT1G70410.1;AT1G70410.2	beta carbonic anhydrase 4 ; beta carbonic anhydrase 4 ; beta carbonic anhydrase 4	120.44	12;12;11;2	12;12;11;2	1531300000	1139100000	1370900000	1168500000	1225300000	1492800000	1224800000	1316800000	1253300000
AT1G70530.1	cysteine-rich RLK (RECEPTOR-like protein kinase) 3	1.8707	1	1	0	0	0	0	4005800	0	0	0	0
AT1G70570.1;AT1G70570.2	anthranilate phosphoribosyltransferase, putative ; anthranilate phosphoribosyltransferase, putative	5.5189	6;6	6;6	0	55696000	59588000	65610000	0	72961000	72020000	71284000	74052000
AT1G70580.4;AT1G70580.3;AT1G70580.2;AT1G70580.1;AT1G23310.2;AT1G23310.1	alanine-2-oxoglutarate aminotransferase 2 ; alanine-2-oxoglutarate aminotransferase 2 ; alanine-2-oxoglutarate aminotransferase 2 ; alanine-2-oxoglutarate aminotransferase 2 ; glutamate:glyoxylate aminotransferase ; glutamate:glyoxylate aminotransferase	78.222	4;4;4;4;3;3	4;4;4;4;3;3	178480000	144270000	135210000	136940000	114410000	125260000	136700000	134020000	158950000
AT1G70660.2;AT1G70660.1;AT1G70650.2	MMS ZWEI homologue 2 ; MMS ZWEI homologue 2 ; Ran BP2/NZF zinc finger-like superfamily protein	1.3119	1;1;1	1;1;1	0	0	0	0	0	0	0	5984400	0
AT1G70670.1	Caleosin-related family protein	1.5168	1	1	0	0	0	0	0	0	0	0	6592400
AT1G70710.1	glycosyl hydrolase 9B1	1.6681	1	1	0	0	0	0	0	0	0	0	10630000
AT1G70730.1;AT1G70730.2;AT1G70730.3	Phosphoglucomutase/phosphomannomutase family protein ; Phosphoglucomutase/phosphomannomutase family protein ; Phosphoglucomutase/phosphomannomutase family protein	111.82	18;18;18	8;8;8	210170000	256280000	283940000	281950000	240160000	286620000	232290000	233520000	245300000
AT1G70770.2;AT1G70770.1	Protein of unknown function DUF2359, transmembrane ; Protein of unknown function DUF2359, transmembrane	323.31	14;14;2	11;11;0	880170000	876320000	885230000	927070000	941320000	1022800000	732240000	842680000	681630000
AT1G70800.1	Calcium-dependent lipid-binding (CaLB domain) family protein	1.5654	2	2	0	0	0	0	0	0	0	0	55482000
AT1G70810.1	Calcium-dependent lipid-binding (CaLB domain) family protein	13.027	2	2	0	0	0	0	0	63211000	0	0	0
AT1G70830.5;AT1G70830.3;AT1G70830.4;AT1G70830.1;AT1G70830.2	MLP-like protein 28 ; MLP-like protein 28 ; MLP-like protein 28 ; MLP-like protein 28 ; MLP-like protein 28	5.5208	5;5;5;5;4	1;1;1;1;1	842370000	902250000	1086100000	843830000	669850000	958710000	794500000	892340000	738220000
AT1G70840.1	MLP-like protein 31	4.0571	3	1	0	0	0	0	0	0	0	0	5343800000
AT1G70850.3;AT1G70850.1;AT1G70850.2	MLP-like protein 34 ; MLP-like protein 34 ; MLP-like protein 34	323.31	18;18;11	10;10;6	37121000000	34392000000	36445000000	35030000000	26942000000	32419000000	31195000000	33337000000	39135000000
AT1G70880.1	Polyketide cyclase/dehydrase and lipid transport superfamily protein	9.95	2	2	0	0	0	0	0	0	0	244240000	184970000
AT1G70890.1	MLP-like protein 43	24.887	9	6	539100000	477080000	405310000	458020000	370410000	408900000	551970000	574110000	496140000
AT1G70980.1	Class II aminoacyl-tRNA and biotin synthetases superfamily protein	6.8164	3	2	0	0	0	0	0	0	0	0	9162500
AT1G71100.1	Ribose 5-phosphate isomerase, type A protein	1.2624	1	1	0	0	0	0	0	0	0	0	10387000
AT1G71220.1;AT1G71220.2	UDP-glucose:glycoprotein glucosyltransferases;transferases, transferring hexosyl groups;transferases, transferring glycosyl groups ; UDP-glucose:glycoprotein glucosyltransferases;transferases, transferring hexosyl groups;transferases, transferring glycosy	53.712	16;16	16;16	317200000	273860000	304740000	280720000	268090000	268840000	219020000	269940000	298160000
AT1G71410.1	ARM repeat superfamily protein	4.9494	3	3	0	0	0	0	0	0	0	0	11169000
AT1G71440.1	tubulin folding cofactor E / Pfifferling (PFI)	3.7208	1	1	0	0	0	0	0	0	0	0	1066200
AT1G71697.1	choline kinase 1	4.3126	2	2	0	0	0	0	0	0	0	0	25317000
AT1G71730.1	unknown protein; Has 52 Blast hits to 52 proteins in 24 species: Archae - 0; Bacteria - 0; Metazoa - 4; Fungi - 0; Plants - 41; Viruses - 0; Other Eukaryotes - 7 (source: NCBI BLink).	67.374	3	3	47302000	63555000	80298000	66266000	78258000	86476000	86159000	88359000	53132000
AT1G71780.1	unknown protein; FUNCTIONS IN: molecular_function unknown; INVOLVED IN: biological_process unknown; LOCATED IN: endoplasmic reticulum; EXPRESSED IN: 25 plant structures; EXPRESSED DURING: 15 growth stages; Has 34 Blast hits to 34 proteins in 11 species: A	3.5477	3	3	0	45939000	43319000	0	57140000	65965000	0	0	0
AT1G71820.1;AT1G71820.2	SEC6 ; SEC6	2.0149	2;2	2;2	0	0	0	0	0	10198000	0	0	0
AT1G71840.1	transducin family protein / WD-40 repeat family protein	6.1546	3	3	0	0	0	0	0	50070000	0	0	0
AT1G71860.3;AT1G71860.1;AT1G71860.2	protein tyrosine phosphatase 1 ; protein tyrosine phosphatase 1 ; protein tyrosine phosphatase 1	18.848	4;4;3	4;4;3	137910000	103480000	94820000	87634000	96722000	70755000	102990000	126620000	125020000
AT1G71920.1;AT5G10330.2;AT5G10330.1;AT1G71920.2;AT5G10330.3;AT1G71920.3	HISTIDINE BIOSYNTHESIS 6B ; histidinol phosphate aminotransferase 1 ; histidinol phosphate aminotransferase 1 ; HISTIDINE BIOSYNTHESIS 6B ; histidinol phosphate aminotransferase 1 ; HISTIDINE BIOSYNTHESIS 6B	6.7424	2;2;2;2;1;1	2;2;2;2;1;1	23676000	21868000	27847000	23926000	27482000	27033000	24112000	27164000	0
AT1G72150.1	PATELLIN 1	323.31	14	11	1827900000	1757100000	1347100000	1373700000	1360700000	1385500000	1411900000	1266200000	1578000000
AT1G72160.1	Sec14p-like phosphatidylinositol transfer family protein	172.87	13	13	1183000000	1013700000	981600000	938070000	870230000	856840000	834490000	935930000	1024400000
AT1G72230.1	Cupredoxin superfamily protein	7.3863	2	2	0	0	35239000	44186000	0	0	0	0	50019000
AT1G72340.1	NagB/RpiA/CoA transferase-like superfamily protein	1.8838	1	1	0	0	0	0	0	0	0	0	10027000
AT1G72370.2;AT1G72370.1	40s ribosomal protein SA ; 40s ribosomal protein SA	207.34	9;9;3;3	9;9;3;3	4111300000	4109700000	4124300000	4191300000	4110400000	3832000000	4349700000	4192200000	4955700000
AT1G72550.2;AT1G72550.1	tRNA synthetase beta subunit family protein ; tRNA synthetase beta subunit family protein	101.8	9;9	9;9	196380000	225170000	260740000	191390000	206390000	246190000	187440000	216450000	181370000
AT1G72680.1	cinnamyl-alcohol dehydrogenase	68.209	8	8	234050000	207620000	204070000	220040000	175690000	224420000	242070000	228400000	228650000
AT1G72730.1	DEA(D/H)-box RNA helicase family protein	14.394	16	5	64187000	75968000	76294000	72964000	88178000	90352000	101020000	84554000	92478000
AT1G72750.1	translocase inner membrane subunit 23-2	3.2286	1	1	0	0	0	0	0	0	0	0	19655000
AT1G72880.2;AT1G72880.1	Survival protein SurE-like phosphatase/nucleotidase ; Survival protein SurE-like phosphatase/nucleotidase	6.3964	1;1	1;1	0	0	0	0	0	0	0	0	16979000
AT1G73180.2;AT1G73180.1	Eukaryotic translation initiation factor eIF2A family protein ; Eukaryotic translation initiation factor eIF2A family protein	1.6561	1;1	1;1	0	0	0	0	0	0	0	20015000	0
AT1G73230.1	Nascent polypeptide-associated complex NAC	166.93	5	3	502670000	474030000	512120000	438470000	499250000	571610000	418500000	545010000	437650000
AT1G73250.1	GDP-4-keto-6-deoxymannose-3,5-epimerase-4-reductase 1	18.232	7	4	0	62539000	0	59899000	0	63116000	0	60324000	0
AT1G73260.1	kunitz trypsin inhibitor 1	83.574	6	6	688630000	587510000	578790000	451400000	421980000	360780000	440190000	410810000	362210000
AT1G73280.1	serine carboxypeptidase-like 3	1.4339	1	1	0	0	0	0	1635700	0	0	0	0
AT1G73330.1	drought-repressed 4	104.2	6	6	794200000	906090000	604100000	760130000	652850000	648170000	810970000	876330000	877030000
AT1G73430.2;AT1G73430.1	sec34-like family protein ; sec34-like family protein	4.3874	2;2	2;2	25087000	24691000	30770000	0	37182000	0	25715000	0	0
AT1G73600.1;AT1G73600.2	S-adenosyl-L-methionine-dependent methyltransferases superfamily protein ; S-adenosyl-L-methionine-dependent methyltransferases superfamily protein	34.244	4;4	1;1	0	0	0	0	0	0	0	0	48713000
AT1G73650.1;AT1G73650.4;AT1G73650.2;AT1G73650.3	Protein of unknown function (DUF1295) ; Protein of unknown function (DUF1295) ; Protein of unknown function (DUF1295) ; Protein of unknown function (DUF1295)	3.4202	2;2;2;2	2;2;2;2	37610000	0	0	0	0	0	33462000	0	12952000
AT1G73710.1	Pentatricopeptide repeat (PPR) superfamily protein	1.3957	1	1	1834500000	1046800000	601730000	1212600000	910050000	1774300000	1635800000	926050000	394590000
AT1G73720.1	transducin family protein / WD-40 repeat family protein	1.6399	3	3	0	0	0	16549000	0	0	0	0	0
AT1G73940.1	unknown protein; BEST Arabidopsis thaliana protein match is: unknown protein (TAIR:AT5G49410.2); Has 54 Blast hits to 54 proteins in 11 species: Archae - 0; Bacteria - 0; Metazoa - 0; Fungi - 0; Plants - 54; Viruses - 0; Other Eukaryotes - 0 (source: NCBI	1.8473	1	1	0	0	0	0	0	0	0	0	21336000
AT1G74020.1	strictosidine synthase 2	32.575	7;1	7;1	320630000	226160000	252720000	275880000	255780000	276270000	244830000	251960000	242150000
AT1G74030.1	enolase 1	323.31	15	15	1521200000	1221300000	1508200000	1275400000	1257200000	1487900000	1135300000	1232500000	964850000
AT1G74040.1	2-isopropylmalate synthase 1	7.2277	5	1	0	0	0	0	0	0	0	0	13962000
AT1G74060.1;AT1G74050.1	Ribosomal protein L6 family protein ; Ribosomal protein L6 family protein	52.942	12;12	6;6	1150600000	1278500000	826650000	1144100000	1475400000	1092600000	1187700000	1040000000	1428400000
AT1G74090.1	desulfo-glucosinolate sulfotransferase 18	13.03	6	4	163050000	85513000	146790000	122740000	130250000	137920000	122230000	120920000	75999000
AT1G74100.1	sulfotransferase 16	141.02	9	7	227730000	221870000	220720000	203760000	199970000	169870000	214240000	191690000	290670000
AT1G74210.1	PLC-like phosphodiesterases superfamily protein	40.09	3	3	128210000	163560000	147630000	121900000	126030000	129260000	137770000	127630000	115750000
AT1G74230.1	glycine-rich RNA-binding protein 5	20.984	2	2	0	50190000	0	0	46141000	59614000	50849000	60483000	0
AT1G74260.1	purine biosynthesis 4	151.84	19	19	482360000	497620000	626040000	515010000	460890000	461670000	503130000	553970000	487260000
AT3G55750.1;AT1G74270.1	Ribosomal protein L35Ae family protein ; Ribosomal protein L35Ae family protein	104.83	3;3	1;1	0	77454000	0	88397000	85439000	108520000	54185000	0	64421000
AT1G74380.1;AT5G07720.1;AT1G18690.1	xyloglucan xylosyltransferase 5 ; Galactosyl transferase GMA12/MNN10 family protein ; Galactosyl transferase GMA12/MNN10 family protein	3.6863	2;1;1	2;1;1	0	0	0	0	0	0	0	0	13315000
AT1G74560.1;AT1G74560.2;AT1G74560.3	NAP1-related protein 1 ; NAP1-related protein 1 ; NAP1-related protein 1	99.367	7;7;7	4;4;4	215510000	264200000	282690000	255260000	288220000	289020000	163460000	241330000	176340000
AT1G74590.1	glutathione S-transferase TAU 10	12.337	4	4	72233000	76465000	74514000	78996000	79307000	61242000	76936000	60892000	56238000
AT1G74790.1	catalytics	3.9697	3	2	0	0	0	0	0	0	0	0	58824000
AT1G74910.3;AT1G74910.2;AT1G74910.1	ADP-glucose pyrophosphorylase family protein ; ADP-glucose pyrophosphorylase family protein ; ADP-glucose pyrophosphorylase family protein	18.503	6;6;6	5;5;5	158230000	188940000	218030000	216280000	187140000	190240000	170450000	193220000	206550000
AT1G74920.1;AT1G74920.2	aldehyde dehydrogenase 10A8 ; aldehyde dehydrogenase 10A8	169.89	17;15	16;14	740240000	653630000	784960000	690250000	718820000	767050000	751170000	733290000	714330000
AT1G74960.3;AT1G74960.2;AT1G74960.1	fatty acid biosynthesis 1 ; fatty acid biosynthesis 1 ; fatty acid biosynthesis 1	19.638	5;5;5	5;5;5	96149000	89211000	86505000	83920000	63028000	96391000	72264000	89000000	92307000
AT1G75270.1	dehydroascorbate reductase 2	78.428	12	12	1287300000	1231500000	1359400000	1365900000	1259200000	1237400000	1572500000	1763700000	1606600000
AT1G75280.1	NmrA-like negative transcriptional regulator family protein	165.07	10;2;1	10;2;1	514880000	537780000	600870000	591240000	484790000	532640000	657830000	615420000	564370000
AT1G75330.1	ornithine carbamoyltransferase	33.961	5	5	117870000	130130000	224470000	212910000	173740000	216790000	183370000	98575000	85678000
AT1G75510.1	Transcription initiation factor IIF, beta subunit	2.6011	1	1	0	0	0	0	0	0	0	8017100	0
AT1G75530.1	Forkhead-associated (FHA) domain-containing protein	1.6827	1	1	0	0	0	0	0	51098000	0	0	0
AT1G75680.1	glycosyl hydrolase 9B7	5.9232	3	3	0	0	0	0	0	0	38825000	0	0
AT1G75750.2;AT1G75750.1	GAST1 protein homolog 1 ; GAST1 protein homolog 1	2.1177	1;1	1;1	0	0	0	0	0	0	0	602380	0
AT1G75780.1	tubulin beta-1 chain	2.2124	19	1	0	0	0	0	0	0	0	0	84634000
AT1G75950.1	S phase kinase-associated protein 1	65.37	5	4	182140000	200660000	114860000	148360000	153460000	218100000	173000000	150110000	165760000
AT1G75990.1	PAM domain (PCI/PINT associated module) protein	3.6412	8	1	0	0	0	0	0	0	0	0	19543000
AT1G76010.1	Alba DNA/RNA-binding protein	38.167	7	6	375440000	358950000	437150000	426390000	389710000	407900000	304740000	408520000	325410000
AT1G76090.1	sterol methyltransferase 3	104.72	4	4	90311000	99404000	79374000	101630000	123560000	119330000	63916000	87897000	125950000
AT1G76140.1;AT1G76140.2	Prolyl oligopeptidase family protein ; Prolyl oligopeptidase family protein	33.681	6;5	6;5	152900000	127390000	187700000	160810000	149890000	142140000	153820000	140080000	127630000
AT1G76150.1	enoyl-CoA hydratase 2	9.5703	3	3	96863000	113580000	115990000	106960000	112640000	107190000	110660000	126000000	97914000
AT1G76160.1	SKU5 similar 5	57.777	6;2;1	3;1;1	133440000	101260000	95765000	97796000	106350000	128880000	109040000	106990000	98847000
AT1G76180.2;AT1G76180.1	Dehydrin family protein ; Dehydrin family protein	55.81	7;7	6;6	480470000	587960000	290960000	415910000	447600000	326220000	441090000	364660000	468300000
AT1G76390.2;AT1G76390.1	ARM repeat superfamily protein ; ARM repeat superfamily protein	1.5163	1;1	1;1	0	0	0	0	0	0	0	0	1815200
AT1G76400.1	Ribophorin I	63.546	12	12	278000000	269800000	286940000	299050000	277310000	328940000	267050000	259920000	253900000
AT1G76490.1	hydroxy methylglutaryl CoA reductase 1	7.0055	1	1	0	0	0	0	0	0	0	0	15259000
AT1G76510.2;AT1G76510.1;AT1G76510.3	ARID/BRIGHT DNA-binding domain-containing protein ; ARID/BRIGHT DNA-binding domain-containing protein ; ARID/BRIGHT DNA-binding domain-containing protein	1.1517	1;1;1	1;1;1	0	0	0	0	0	0	0	3775400	0
AT1G76550.1	Phosphofructokinase family protein	49.083	18	9	131710000	226330000	190820000	196490000	219730000	196170000	196260000	162550000	172990000
AT1G76680.1;AT1G76680.2	12-oxophytodienoate reductase 1 ; 12-oxophytodienoate reductase 1	323.31	19;18;1;1	13;12;0;0	2596000000	2181500000	2125400000	2347500000	1955500000	1965900000	2583600000	2584200000	2581200000
AT1G76690.1	12-oxophytodienoate reductase 2	24.372	13	7	231950000	167260000	181790000	197590000	138790000	169860000	139480000	190610000	173120000
AT1G76790.1	O-methyltransferase family protein	152.42	16	15	997760000	839230000	998000000	877900000	712640000	739110000	971260000	864830000	833660000
AT1G76810.1	eukaryotic translation initiation factor 2 (eIF-2) family protein	95.478	12;5;4	12;5;4	194540000	175450000	144450000	145260000	140960000	177400000	157980000	161010000	165830000
AT1G76860.1	Small nuclear ribonucleoprotein family protein	4.7387	3;1	3;1	0	0	105290000	118500000	90531000	103160000	93363000	101620000	93480000
AT1G76970.1	Target of Myb protein 1	3.108	2	1	0	0	0	0	0	0	0	0	4569600
AT1G77180.3;AT1G77180.2;AT1G77180.1	chromatin protein family ; chromatin protein family ; chromatin protein family	8.0352	2;2;2	2;2;2	0	127750000	0	131530000	119340000	122250000	145780000	186740000	0
AT1G77330.1	2-oxoglutarate (2OG) and Fe(II)-dependent oxygenase superfamily protein	17.749	3	3	0	0	82095000	0	70236000	93078000	63683000	78277000	53861000
AT1G77440.2;AT1G77440.1	20S proteasome beta subunit C2 ; 20S proteasome beta subunit C2	40.936	7;7	1;1	12699000	54513000	10727000	104980000	10728000	109340000	14937000	93544000	71038000
AT1G77510.1	PDI-like 1-2	131.11	14	10	803960000	779870000	787350000	755430000	694400000	689260000	674710000	766410000	804140000
AT1G77520.1	O-methyltransferase family protein	120.88	10	8	285790000	328050000	482030000	335380000	247890000	256190000	324850000	221240000	208800000
AT1G77530.1	O-methyltransferase family protein	62.093	12;1;1;1	10;0;1;0	161650000	171450000	217180000	146500000	152800000	124200000	177670000	167450000	196900000
AT1G77540.1	Acyl-CoA N-acyltransferases (NAT) superfamily protein	1.1283	1	1	0	0	0	0	0	0	0	0	29446000
AT1G77550.1	tubulin-tyrosine ligases;tubulin-tyrosine ligases	36.621	9	9	87934000	108570000	180290000	117240000	140170000	130170000	124340000	103030000	86341000
AT1G77590.1	long chain acyl-CoA synthetase 9	5.4838	3	2	0	0	41853000	0	47927000	52698000	51462000	0	0
AT1G77670.1	Pyridoxal phosphate (PLP)-dependent transferases superfamily protein	2.1656	1	1	0	0	0	0	0	0	0	0	17557000
AT1G77710.1	CONTAINS InterPro DOMAIN/s: Ubiquitin-like, Ufm1 (InterPro:IPR005375); Has 244 Blast hits to 244 proteins in 106 species: Archae - 0; Bacteria - 0; Metazoa - 149; Fungi - 0; Plants - 47; Viruses - 0; Other Eukaryotes - 48 (source: NCBI BLink).	7.5415	2	2	135750000	82142000	83428000	89614000	84526000	86344000	81858000	97196000	113490000
AT1G77760.1	nitrate reductase 1	14.266	4	4	92764000	95839000	69158000	91717000	93520000	104670000	71539000	107250000	123250000
AT1G77940.1	Ribosomal protein L7Ae/L30e/S12e/Gadd45 family protein	27.01	5	2	922040000	767170000	811040000	943400000	935270000	831270000	848160000	943560000	858240000
AT1G78000.2;AT1G78000.1	sulfate transporter 1;2 ; sulfate transporter 1;2	18.259	5;5;2;1	5;5;2;1	0	59145000	88406000	64761000	75946000	77672000	72957000	85708000	47878000
AT1G78040.2;AT1G78040.1	Pollen Ole e 1 allergen and extensin family protein ; Pollen Ole e 1 allergen and extensin family protein	2.726	3;3	3;3	0	0	0	0	0	37364000	0	0	0
AT1G78060.1	Glycosyl hydrolase family protein	73.92	10	10	236160000	184220000	256840000	205660000	169710000	217190000	250400000	224620000	331440000
AT1G78150.2;AT1G78150.1;AT1G78150.3	unknown protein; BEST Arabidopsis thaliana protein match is: unknown protein (TAIR:AT1G35780.1); Has 35333 Blast hits to 34131 proteins in 2444 species: Archae - 798; Bacteria - 22429; Metazoa - 974; Fungi - 991; Plants - 531; Viruses - 0; Other Eukaryote	18.402	1;1;1	1;1;1	0	0	0	0	0	0	0	0	16669000
AT1G78300.1	general regulatory factor 2	216.5	14;1	9;0	1371500000	1339400000	1156100000	1377100000	1416900000	1220900000	1498900000	1392600000	1676300000
AT1G78340.1	glutathione S-transferase TAU 22	65.938	9	8	239330000	209840000	195560000	251840000	209060000	276510000	239280000	241490000	210740000
AT1G78370.1	glutathione S-transferase TAU 20	49.67	9	8	237500000	164230000	274090000	268810000	296240000	241800000	356700000	360950000	279710000
AT1G78380.1	glutathione S-transferase TAU 19	323.31	13;1	10;1	8011400000	8662700000	8701400000	9318200000	7042100000	8018800000	9994300000	9071700000	9551700000
AT1G78570.1	rhamnose biosynthesis 1	278.64	27	17	1522000000	1598100000	1757800000	1467400000	1719500000	1739900000	1579300000	1622900000	1580800000
AT1G78660.2;AT1G78660.3;AT1G78660.1	gamma-glutamyl hydrolase 1 ; gamma-glutamyl hydrolase 1 ; gamma-glutamyl hydrolase 1	10.465	3;3;3	2;2;2	0	0	0	0	22940000	0	19145000	24310000	25968000
AT1G78670.1	gamma-glutamyl hydrolase 3	2.65	3	2	0	16575000	0	0	0	0	0	0	0
AT1G78680.2;AT1G78680.1	gamma-glutamyl hydrolase 2 ; gamma-glutamyl hydrolase 2	80.826	6;6	5;5	229230000	200930000	208800000	181740000	243550000	165940000	194500000	216420000	186580000
AT1G78830.1;AT1G78820.1	Curculin-like (mannose-binding) lectin family protein ; D-mannose binding lectin protein with Apple-like carbohydrate-binding domain	45.285	5;3	5;3	158920000	77255000	66516000	100620000	0	91193000	70274000	96854000	93242000
AT1G78850.1	D-mannose binding lectin protein with Apple-like carbohydrate-binding domain	292.54	18	8	3259900000	2888700000	2566300000	2357500000	2131100000	1973100000	2203600000	1996000000	2710300000
AT1G78860.1	D-mannose binding lectin protein with Apple-like carbohydrate-binding domain	-2	11	1	0	0	0	0	0	0	0	0	52141000
AT1G78900.2;AT1G78900.1	vacuolar ATP synthase subunit A ; vacuolar ATP synthase subunit A	323.31	34;34	34;34	7951000000	7098100000	6283700000	7123900000	7262400000	6431300000	6231900000	6803100000	7614100000
AT1G79010.1	Alpha-helical ferredoxin	119.56	5	1	189020000	167290000	141090000	185560000	160290000	218090000	168180000	0	167140000
AT1G79230.3;AT1G79230.1;AT1G79230.2	mercaptopyruvate sulfurtransferase 1 ; mercaptopyruvate sulfurtransferase 1 ; mercaptopyruvate sulfurtransferase 1	40.211	9;9;5	9;9;5	478200000	359030000	397500000	300480000	310790000	402530000	349270000	304720000	327380000
AT1G79260.1	CONTAINS InterPro DOMAIN/s: Domain of unknown function DUF1794 (InterPro:IPR014878); Has 30201 Blast hits to 17322 proteins in 780 species: Archae - 12; Bacteria - 1396; Metazoa - 17338; Fungi - 3422; Plants - 5037; Viruses - 0; Other Eukaryotes - 2996 (s	2.9668	1	1	0	0	0	0	0	0	5865200	0	0
AT1G79280.1;AT1G79280.3;AT1G79280.2	nuclear pore anchor ; nuclear pore anchor ; nuclear pore anchor	15.601	8;8;8	8;8;8	132660000	118990000	114310000	110420000	112580000	132860000	133960000	168800000	0
AT1G79340.1	metacaspase 4	191.97	10;1	7;0	450910000	476160000	387020000	483020000	468910000	459570000	465440000	424110000	416520000
AT2G01060.2;AT2G01060.1;AT4G13640.1;AT1G79430.1;AT1G79430.2;AT3G04030.2;AT3G04030.3;AT5G18240.4;AT5G18240.1	myb-like HTH transcriptional regulator family protein ; myb-like HTH transcriptional regulator family protein ; Homeodomain-like superfamily protein ; Homeodomain-like superfamily protein ; Homeodomain-like superfamily protein ; Homeodomain-like superfami	1.3067	1;1;1;1;1;1;1;1;1	1;1;1;1;1;1;1;1;1	0	0	0	0	0	0	0	0	3545700
AT1G79440.1	aldehyde dehydrogenase 5F1	118.78	17	17	683680000	550940000	481330000	563100000	541940000	543750000	565080000	584870000	661940000
AT1G79470.1	Aldolase-type TIM barrel family protein	2.5062	5	3	0	0	33087000	0	29975000	0	0	34039000	42974000
AT1G79500.4;AT1G79500.3;AT1G79500.2;AT1G79500.1	Aldolase-type TIM barrel family protein ; Aldolase-type TIM barrel family protein ; Aldolase-type TIM barrel family protein ; Aldolase-type TIM barrel family protein	2.2573	3;3;3;3	1;1;1;1	0	0	0	0	0	0	33942000	0	0
AT1G79530.1	glyceraldehyde-3-phosphate dehydrogenase of plastid 1	323.31	12	7	1520100000	1492900000	1620800000	1467700000	1359400000	1541400000	1222900000	1531600000	1421100000
AT1G79550.2;AT1G79550.1	phosphoglycerate kinase ; phosphoglycerate kinase	323.31	18;18	14;14	8541000000	7911600000	8276900000	8692000000	7797600000	7676600000	8392200000	8764400000	8737900000
AT1G79570.1;AT1G16270.2;AT1G16270.1	Protein kinase superfamily protein with octicosapeptide/Phox/Bem1p domain ; Protein kinase superfamily protein with octicosapeptide/Phox/Bem1p domain ; Protein kinase superfamily protein with octicosapeptide/Phox/Bem1p domain	2.4808	2;1;1	2;1;1	0	0	0	0	0	0	0	0	30497000
AT1G79690.1	nudix hydrolase homolog 3	75.047	12	12	343080000	341490000	468120000	387740000	344030000	409040000	391440000	409150000	427090000
AT1G79750.1	NADP-malic enzyme 4	252.38	14;3	13;2	396440000	363990000	506430000	438810000	432250000	493430000	297710000	426730000	301930000
AT1G79830.3;AT1G79830.2;AT1G79830.1;AT1G79830.4	golgin candidate 5 ; golgin candidate 5 ; golgin candidate 5 ; golgin candidate 5	16.301	5;5;5;5	5;5;5;5	39336000	43549000	29238000	47581000	40003000	36155000	36849000	46082000	83748000
AT1G79870.2;AT1G79870.1	D-isomer specific 2-hydroxyacid dehydrogenase family protein ; D-isomer specific 2-hydroxyacid dehydrogenase family protein	60.757	7;7	7;7	395510000	369670000	420610000	406810000	417380000	374970000	414720000	430330000	338650000
AT1G79920.2;AT1G79920.1	Heat shock protein 70 (Hsp 70) family protein ; Heat shock protein 70 (Hsp 70) family protein	103.47	29;29	5;5	196310000	232210000	326180000	293390000	245670000	248310000	236130000	328140000	217670000
AT1G79930.2;AT1G79930.1	heat shock protein 91 ; heat shock protein 91	323.31	30;30	6;6	1764500000	1613800000	1840800000	1706400000	1703000000	1724700000	1569100000	1606200000	1742200000
AT1G79940.4;AT1G79940.3;AT1G79940.2;AT1G79940.1	DnaJ / Sec63 Brl domains-containing protein ; DnaJ / Sec63 Brl domains-containing protein ; DnaJ / Sec63 Brl domains-containing protein ; DnaJ / Sec63 Brl domains-containing protein	14.878	5;5;5;5	5;5;5;5	45212000	55220000	38483000	55202000	62336000	55318000	50206000	46495000	57296000
AT1G79990.5;AT1G79990.3;AT1G79990.1	structural molecules ; structural molecules ; structural molecules	9.1637	12;12;11	4;4;4	0	70932000	52110000	66025000	81906000	74162000	67592000	72647000	59354000
AT1G80070.1;AT4G38780.1	Pre-mRNA-processing-splicing factor ; Pre-mRNA-processing-splicing factor	11.512	12;6	12;6	76863000	99061000	114370000	98504000	99103000	96834000	94923000	79124000	82570000
AT1G80230.1	Rubredoxin-like superfamily protein	8.2937	4	3	83719000	102930000	62256000	107380000	106210000	118200000	100230000	77978000	124430000
AT1G80240.1	Protein of unknown function, DUF642	13.838	6	6	196470000	256700000	220340000	220530000	210030000	234570000	210280000	255320000	211540000
AT1G80270.3;AT1G80270.2;AT1G80270.1	PENTATRICOPEPTIDE REPEAT 596 ; PENTATRICOPEPTIDE REPEAT 596 ; PENTATRICOPEPTIDE REPEAT 596	4.985	4;4;4;1	4;4;4;1	30524000	49463000	45054000	64243000	58538000	55286000	40194000	40447000	45238000
AT1G80360.1	Pyridoxal phosphate (PLP)-dependent transferases superfamily protein	77.132	7	7	269370000	155430000	244480000	190140000	181360000	207020000	171650000	195850000	175550000
AT1G80410.1;AT1G80410.2	tetratricopeptide repeat (TPR)-containing protein ; tetratricopeptide repeat (TPR)-containing protein	164.85	14;14	14;14	298720000	337780000	300480000	281490000	334970000	312740000	285090000	290280000	365570000
AT1G80460.2;AT1G80460.1	Actin-like ATPase superfamily protein ; Actin-like ATPase superfamily protein	56.814	14;14	14;14	651660000	640760000	499540000	599800000	628320000	667000000	595410000	653960000	785480000
AT1G80500.1	SNARE-like superfamily protein	4.0537	2	2	0	0	0	0	0	0	0	0	20461000
AT1G80560.1	isopropylmalate dehydrogenase 2	69.09	10	6	197760000	204220000	203210000	173910000	181380000	202250000	181640000	206850000	184400000
AT1G80600.1	HOPW1-1-interacting 1	69.938	7	7	202060000	208710000	265210000	210600000	213010000	201920000	200380000	196010000	188370000
AT2G01140.1	Aldolase superfamily protein	223.73	13;2;2;2;1;1	13;2;2;2;1;1	1294700000	1228700000	877850000	985270000	1103800000	1120300000	1147900000	1082200000	1268700000
AT2G01250.1;AT2G01250.2	Ribosomal protein L30/L7 family protein ; Ribosomal protein L30/L7 family protein	83.209	9;5	5;2	607610000	505930000	513270000	544820000	423470000	445630000	440640000	576390000	585130000
AT2G01350.4;AT2G01350.2;AT2G01350.3;AT2G01350.1	quinolinate phoshoribosyltransferase ; quinolinate phoshoribosyltransferase ; quinolinate phoshoribosyltransferase ; quinolinate phoshoribosyltransferase	24.363	8;7;7;7	8;7;7;7	113190000	125540000	131550000	114400000	143780000	134680000	107440000	131510000	104580000
AT2G01470.1	SEC12P-like 2 protein	4.1936	3	3	0	0	0	0	51909000	0	0	0	0
AT2G01490.1	phytanoyl-CoA dioxygenase (PhyH) family protein	10.619	4	4	89957000	87595000	115650000	109710000	89729000	101490000	99071000	122090000	111760000
AT2G01520.1	MLP-like protein 328	323.31	15	9	50382000000	42275000000	37996000000	31631000000	30573000000	31693000000	42488000000	39985000000	50554000000
AT2G01530.1	MLP-like protein 329	120.2	11	6	5155800000	5653700000	3548500000	4524600000	3877800000	3933900000	4507000000	4350800000	4878900000
AT2G01540.1	Calcium-dependent lipid-binding (CaLB domain) family protein	9.654	3	3	0	0	0	0	0	0	0	0	33440000
AT2G01600.1	ENTH/ANTH/VHS superfamily protein	12.396	2	2	0	27232000	0	0	0	25878000	0	0	32241000
AT2G01650.1	plant UBX domain-containing protein 2	6.0093	3	3	0	0	51313000	0	0	0	0	34912000	0
AT2G01690.1;AT2G01690.2	ARM repeat superfamily protein ; ARM repeat superfamily protein	8.1865	6;6	6;6	42791000	48342000	42536000	76108000	53531000	0	0	68067000	58857000
AT2G01720.1	Ribophorin I	117.87	4	4	80785000	118810000	97906000	115920000	132920000	148580000	94331000	100630000	61878000
AT2G01880.1	purple acid phosphatase 7	6.1827	2	2	41703000	45640000	41681000	57399000	27979000	43199000	30697000	0	40353000
AT2G02050.1	NADH-ubiquinone oxidoreductase B18 subunit, putative	16.986	4	4	91698000	116140000	74690000	128540000	124710000	107120000	118510000	99964000	141860000
AT2G02100.1	low-molecular-weight cysteine-rich 69	60.259	1	1	187940000	166920000	175430000	293390000	225100000	202140000	263100000	257970000	365740000
AT2G02130.1	low-molecular-weight cysteine-rich 68	114.94	1	1	1013600000	650170000	329120000	894250000	672360000	1086700000	977960000	898300000	1112900000
AT2G02390.1;AT2G02390.2;AT2G02390.3	glutathione S-transferase zeta 1 ; glutathione S-transferase zeta 1 ; glutathione S-transferase zeta 1	173.19	5;4;4;1	5;4;4;1	562340000	549420000	565910000	640190000	555960000	602630000	459960000	790860000	538070000
AT2G02560.2;AT2G02560.1	cullin-associated and neddylation dissociated ; cullin-associated and neddylation dissociated	195.58	16;16	16;16	311310000	424680000	460650000	463340000	414570000	482580000	373400000	313590000	224210000
AT2G02740.2;AT2G02740.1	ssDNA-binding transcriptional regulator ; ssDNA-binding transcriptional regulator	5.3582	1;1	1;1	0	0	0	0	0	0	0	6557800	0
AT2G02750.1	Pentatricopeptide repeat (PPR) superfamily protein	1.8743	1	1	0	0	0	0	0	0	0	0	66203000
AT2G02850.1	plantacyanin	1.7494	1	1	0	0	0	0	0	0	0	0	17017000
AT2G03220.1	fucosyltransferase 1	-2	1	1	0	0	0	0	0	0	0	0	10253000
AT2G03440.1	nodulin-related protein 1	17.419	3	3	89179000	66221000	67779000	60627000	58156000	69499000	94293000	82323000	121160000
AT2G03510.1	SPFH/Band 7/PHB domain-containing membrane-associated protein family	20.188	3	3	0	0	0	37830000	0	52766000	0	0	0
AT2G03640.1;AT2G03640.2;AT2G03640.4;AT2G03640.3	Nuclear transport factor 2 (NTF2) family protein with RNA binding (RRM-RBD-RNP motifs) domain ; Nuclear transport factor 2 (NTF2) family protein with RNA binding (RRM-RBD-RNP motifs) domain ; Nuclear transport factor 2 (NTF2) family protein with RNA bindi	6.7656	3;3;3;3	3;3;3;3	60255000	0	0	64947000	0	0	0	54819000	53535000
AT2G03760.1	sulphotransferase 12	8.8933	4	4	63017000	75857000	73840000	65223000	51156000	57062000	67125000	74817000	59942000
AT2G03820.1	nonsense-mediated mRNA decay NMD3 family protein	1.5278	2	2	0	0	0	0	0	0	0	0	15756000
AT2G03870.2;AT2G03870.1	Small nuclear ribonucleoprotein family protein ; Small nuclear ribonucleoprotein family protein	7.4829	2;2	2;2	12306000	24740000	31110000	23930000	14279000	28262000	17415000	28825000	11457000
AT2G04030.2;AT2G04030.1	Chaperone protein htpG family protein ; Chaperone protein htpG family protein	102.72	21;21	18;18	602550000	591880000	730860000	646260000	725170000	729540000	595400000	595600000	563070000
AT2G04160.1	Subtilisin-like serine endopeptidase family protein	22.002	5	5	145910000	159130000	104180000	135710000	86436000	122860000	95828000	108160000	122410000
AT2G04170.4;AT2G04170.3;AT2G04170.5;AT2G04170.2;AT2G04170.1	TRAF-like family protein ; TRAF-like family protein ; TRAF-like family protein ; TRAF-like family protein ; TRAF-like family protein	4.2545	4;4;4;4;4	1;1;1;1;1	0	0	0	0	0	0	0	0	22591000
AT2G04350.2;AT2G04350.1	AMP-dependent synthetase and ligase family protein ; AMP-dependent synthetase and ligase family protein	9.3857	2;2	1;1	0	0	0	0	0	0	0	0	9979600
AT2G04400.1	Aldolase-type TIM barrel family protein	52.996	9	9	167170000	174610000	185340000	197760000	182450000	172580000	205910000	183440000	175720000
AT2G04410.1	RPM1-interacting protein 4 (RIN4) family protein	1.4725	1	1	0	0	0	0	0	0	0	0	7588000
AT2G04650.1	ADP-glucose pyrophosphorylase family protein	3.1043	3	2	0	0	0	0	0	0	0	0	25837000
AT2G04780.2;AT2G04780.1	FASCICLIN-like arabinoogalactan 7 ; FASCICLIN-like arabinoogalactan 7	50.231	3;3	3;3	350850000	265780000	267710000	282610000	184890000	232040000	189280000	335880000	275830000
AT2G04900.2;AT2G04900.1	unknown protein; FUNCTIONS IN: molecular_function unknown; LOCATED IN: cellular_component unknown; EXPRESSED IN: 23 plant structures; EXPRESSED DURING: 15 growth stages; CONTAINS InterPro DOMAIN/s: Protein of unknown function DUF423 (InterPro:IPR006696);	8.9598	1;1	1;1	0	0	0	0	0	0	0	0	29036000
AT2G05170.1	vacuolar protein sorting 11	11.998	4	4	128720000	117360000	117320000	131470000	0	0	119430000	0	127100000
AT2G05710.1	aconitase 3	323.31	33	26	3915800000	3505500000	4095600000	3550000000	3758500000	3562000000	3684400000	3524000000	3338500000
AT2G05830.1;AT2G05830.3;AT2G05830.2;AT2G05830.4	NagB/RpiA/CoA transferase-like superfamily protein ; NagB/RpiA/CoA transferase-like superfamily protein ; NagB/RpiA/CoA transferase-like superfamily protein ; NagB/RpiA/CoA transferase-like superfamily protein	63.514	6;5;5;5	6;5;5;5	95684000	92423000	77291000	92696000	101200000	95201000	98924000	73600000	65067000
AT2G05840.1;AT2G05840.2	20S proteasome subunit PAA2 ; 20S proteasome subunit PAA2	120.7	12;9	8;6	785830000	743780000	898170000	881200000	843820000	893220000	798390000	1002100000	776930000
AT2G05920.1	Subtilase family protein	260.89	17;1	16;0	482910000	540980000	720000000	587580000	559290000	500900000	533580000	581630000	623060000
AT2G05990.2;AT2G05990.1	NAD(P)-binding Rossmann-fold superfamily protein ; NAD(P)-binding Rossmann-fold superfamily protein	323.31	12;12	12;12	453800000	594300000	653760000	629880000	498450000	578980000	547120000	611980000	543660000
AT2G06050.3;AT2G06050.2;AT2G06050.1	oxophytodienoate-reductase 3 ; oxophytodienoate-reductase 3 ; oxophytodienoate-reductase 3	20.463	3;3;3	3;3;3	37805000	25734000	44229000	42217000	33627000	0	38498000	31401000	31371000
AT2G06210.1	binding	2.3703	1	1	0	0	0	0	0	0	0	0	5849700
AT2G06530.1	SNF7 family protein	65.121	1	1	0	0	0	0	0	0	0	0	17153000
AT2G06850.1	xyloglucan endotransglucosylase/hydrolase 4	13.552	5	4	113240000	85433000	97587000	87937000	109400000	106050000	95010000	123850000	108250000
AT2G06990.1	RNA helicase, ATP-dependent, SK12/DOB1 protein	8.5638	3	3	15069000	14913000	0	15119000	19104000	13291000	45234000	22771000	42291000
AT2G07360.1;AT2G07360.2	SH3 domain-containing protein ; SH3 domain-containing protein	83.345	7;7	7;7	73120000	69564000	90513000	71141000	69164000	75762000	54780000	60788000	66877000
ATMG01190.1;AT2G07698.1	ATP synthase subunit 1 ; ATPase, F1 complex, alpha subunit protein	323.31	18;18	18;18	5783000000	6212300000	5908400000	6249800000	6447600000	6791000000	5401000000	5668900000	5478500000
ATMG00480.1;AT2G07707.1	Plant mitochondrial ATPase, F0 complex, subunit 8 protein ; Plant mitochondrial ATPase, F0 complex, subunit 8 protein	44.502	5;5	5;5	558690000	441490000	416060000	477860000	520370000	512950000	536440000	558660000	573600000
ATMG00220.1;AT2G07727.1	apocytochrome b ; Di-haem cytochrome, transmembrane;Cytochrome b/b6, C-terminal	1.5231	1;1	1;1	0	0	0	0	0	0	0	0	14489000
ATMG00290.1;AT2G07734.1	mitochondrial ribosomal protein S4 ; Alpha-L RNA-binding motif/Ribosomal protein S4 family protein	1.483	1;1	1;1	0	0	0	0	0	0	0	0	20072000
AT2G09990.1	Ribosomal protein S5 domain 2-like superfamily protein	65.773	8	1	327720000	271670000	162400000	237700000	276790000	253670000	259020000	222290000	450860000
AT2G12400.1	unknown protein; FUNCTIONS IN: molecular_function unknown; INVOLVED IN: biological_process unknown; LOCATED IN: endomembrane system; EXPRESSED IN: 25 plant structures; EXPRESSED DURING: 13 growth stages; BEST Arabidopsis thaliana protein match is: unknown	3.865	2	2	0	46364000	101010000	32819000	0	0	29817000	0	0
AT2G13360.2;AT2G13360.1	alanine:glyoxylate aminotransferase ; alanine:glyoxylate aminotransferase	6.4587	3;3	3;3	0	0	0	0	0	0	0	31258000	0
AT2G13540.1	ARM repeat superfamily protein	57.76	9	9	102500000	142760000	187310000	138810000	115850000	161430000	132530000	135590000	105560000
AT2G13560.1	NAD-dependent malic enzyme 1	39.013	8	8	261790000	267540000	327730000	295700000	279270000	305010000	334850000	287860000	219650000
AT2G14120.2;AT2G14120.1;AT2G14120.3	dynamin related protein ; dynamin related protein ; dynamin related protein	13.987	6;6;6	4;4;4	105100000	85493000	115230000	58342000	81998000	61950000	100030000	85489000	66263000
AT2G14170.2;AT2G14170.1;AT2G14170.3	aldehyde dehydrogenase 6B2 ; aldehyde dehydrogenase 6B2 ; aldehyde dehydrogenase 6B2	102.17	5;5;4	5;5;4	122870000	142380000	146550000	138560000	190470000	129990000	142090000	83067000	61771000
AT2G14260.2;AT2G14260.1	proline iminopeptidase ; proline iminopeptidase	16.698	2;2	2;2	0	0	35908000	46597000	0	0	42285000	49009000	0
AT2G14720.2;AT2G14720.1;AT2G14740.2;AT2G14740.1	vacuolar sorting receptor 4 ; vacuolar sorting receptor 4 ; vaculolar sorting receptor 3 ; vaculolar sorting receptor 3	37.729	7;7;6;6	6;6;5;5	149780000	163150000	183520000	171310000	169970000	186370000	135830000	146370000	117350000
AT2G14750.1	APS kinase	8.7125	3	3	0	48259000	50876000	0	41869000	44675000	43224000	42081000	34489000
AT2G14835.2;AT2G14835.1	RING/U-box superfamily protein ; RING/U-box superfamily protein	1.503	1;1	1;1	0	0	0	0	0	0	22033000	0	0
AT2G15220.1;AT2G15130.2;AT2G15130.1	Plant basic secretory protein (BSP) family protein ; Plant basic secretory protein (BSP) family protein ; Plant basic secretory protein (BSP) family protein	8.7248	2;1;1	2;1;1	0	0	0	0	0	0	0	0	59962000
AT2G15390.1;AT2G15390.2	fucosyltransferase 4 ; fucosyltransferase 4	3.8936	1;1	1;1	0	0	0	0	0	0	0	0	2034000
AT2G15490.3;AT2G15490.1;AT2G15490.2;AT2G15480.1;AT2G15480.2	UDP-glycosyltransferase 73B4 ; UDP-glycosyltransferase 73B4 ; UDP-glycosyltransferase 73B4 ; UDP-glucosyl transferase 73B5 ; UDP-glucosyl transferase 73B5	80.121	7;7;6;4;4	7;7;6;4;4	136850000	137970000	134220000	129330000	137500000	145970000	164770000	132930000	121720000
AT2G15620.1	nitrite reductase 1	144.34	20	20	941120000	871540000	1020100000	898370000	1006800000	982450000	951470000	901180000	925080000
AT2G15790.1	peptidyl-prolyl cis-trans isomerase / cyclophilin-40 (CYP40) / rotamase	3.1783	1	1	0	0	0	0	0	0	0	0	8193600
AT2G15860.1;AT2G15860.2	unknown protein; FUNCTIONS IN: molecular_function unknown; INVOLVED IN: biological_process unknown; LOCATED IN: cellular_component unknown; EXPRESSED IN: 24 plant structures; EXPRESSED DURING: 13 growth stages; Has 30201 Blast hits to 17322 proteins in 78	7.8257	3;3	3;3	0	0	0	0	0	0	48040000	0	0
AT2G16005.1	MD-2-related lipid recognition domain-containing protein	106.62	7	7	2012200000	3022000000	1878100000	1946800000	1005700000	1180200000	1574700000	1471300000	2651500000
AT2G16060.1	hemoglobin 1	2.4627	2	2	0	0	0	0	0	0	0	23722000	0
AT2G16370.1	thymidylate synthase 1	3.2386	1	1	0	0	0	0	0	0	0	0	12956000
AT2G16460.2;AT2G16460.1	Protein of unknown function (DUF1640) ; Protein of unknown function (DUF1640)	2.8531	2;2	2;2	0	0	0	0	0	0	14503000	0	0
AT4G38920.1;AT4G34720.1;AT2G16510.1;AT1G19910.1;AT1G75630.1;AT1G75630.2	vacuolar-type H(+)-ATPase C3 ; ATPase, F0/V0 complex, subunit C protein ; ATPase, F0/V0 complex, subunit C protein ; ATPase, F0/V0 complex, subunit C protein ; vacuolar H+-pumping ATPase 16 kDa proteolipid subunit 4 ; vacuolar H+-pumping ATPase 16 kDa pro	30.221	2;2;2;1;1;1	2;2;2;1;1;1	199960000	167400000	141220000	213100000	164600000	246510000	155150000	144920000	154710000
AT2G16570.1	GLN phosphoribosyl pyrophosphate amidotransferase 1	3.8703	3;1;1	3;1;1	0	0	0	0	0	50950000	50080000	0	0
AT2G16600.1;AT2G16600.2	rotamase CYP 3 ; rotamase CYP 3	323.31	9;8	8;7	4813400000	3801900000	4870400000	3815600000	3600600000	4731800000	3741600000	3826900000	3392400000
AT2G16640.1;AT3G16620.1	multimeric translocon complex in the outer envelope membrane 132 ; translocon outer complex protein 120	1.4042	2;1	2;1	0	0	0	0	0	0	0	0	7515400
AT5G56150.2;AT5G56150.1;AT2G16740.1	ubiquitin-conjugating enzyme 30 ; ubiquitin-conjugating enzyme 30 ; ubiquitin-conjugating enzyme 29	10.056	1;1;1	1;1;1	0	0	0	0	0	0	0	0	32835000
AT2G16760.1;AT2G47370.1	Calcium-dependent phosphotriesterase superfamily protein ; Calcium-dependent phosphotriesterase superfamily protein	5.6253	2;1	2;1	0	0	0	0	0	0	0	0	25377000
AT2G16780.1	Transducin family protein / WD-40 repeat family protein	30.657	2	2	0	0	0	27410000	0	0	19806000	17459000	0
AT2G16790.2;AT2G16790.1	P-loop containing nucleoside triphosphate hydrolases superfamily protein ; P-loop containing nucleoside triphosphate hydrolases superfamily protein	2.0487	1;1	1;1	0	0	0	0	0	0	0	0	22424000
AT2G16940.1;AT2G16940.3;AT2G16940.2	Splicing factor, CC1-like ; Splicing factor, CC1-like ; Splicing factor, CC1-like	7.2719	2;2;2	2;2;2	0	46689000	39356000	52472000	0	53589000	46556000	0	0
AT2G16950.2;AT2G16950.1	transportin 1 ; transportin 1	82.843	17;16	17;16	520810000	545600000	548650000	477470000	573810000	602200000	421570000	476600000	411090000
AT2G17120.1	lysm domain GPI-anchored protein 2 precursor	2.2085	2	2	0	0	0	0	0	0	0	60291000	0
AT2G17130.2;AT2G17130.1	isocitrate dehydrogenase subunit 2 ; isocitrate dehydrogenase subunit 2	60.129	13;13	6;6	296390000	303430000	347720000	256100000	329810000	294700000	309540000	281250000	258920000
AT2G17190.1	ubiquitin family protein	6.9759	2	1	0	0	0	0	0	0	0	0	55986000
AT2G17200.1	ubiquitin family protein	32.233	4	3	120570000	85220000	83580000	76212000	107120000	84615000	90707000	67836000	84674000
AT2G17265.1	homoserine kinase	81.383	9	9	381310000	419460000	523580000	426490000	433120000	463580000	360360000	464170000	349810000
AT2G17280.2;AT2G17280.1	Phosphoglycerate mutase family protein ; Phosphoglycerate mutase family protein	16.323	3;3	3;3	0	24003000	35353000	41319000	0	0	0	0	0
AT2G17340.1;AT2G17320.1	Uncharacterised conserved protein (UCP030210) ; Uncharacterised conserved protein (UCP030210)	88.609	6;3	4;1	51270000	80278000	63668000	62451000	63462000	69125000	55501000	58207000	40085000
AT2G17380.1;AT4G35410.2	associated protein 19 ; Clathrin adaptor complex small chain family protein	7.8806	1;1	1;1	0	0	0	0	0	0	0	0	76993000
AT2G17390.1	ankyrin repeat-containing 2B	34.101	7	6	215100000	193690000	83063000	195330000	142790000	195810000	177160000	192940000	203480000
AT2G17420.1	NADPH-dependent thioredoxin reductase A	219.69	10	7	1823400000	1669900000	1994500000	1834800000	1433900000	1613100000	1671500000	1869600000	1869600000
AT2G17440.1	plant intracellular ras group-related LRR 5	1.2191	1	1	0	0	0	0	0	0	0	0	3499300
AT2G17510.1;AT2G17510.2	ribonuclease II family protein ; ribonuclease II family protein	2.5442	3;3	3;3	0	0	0	0	0	0	0	0	20757000
AT2G17560.3;AT2G17560.2;AT2G17560.1	high mobility group B4 ; high mobility group B4 ; high mobility group B4	2.1093	1;1;1	1;1;1	0	0	0	0	0	0	0	0	26988000
AT2G17630.1	Pyridoxal phosphate (PLP)-dependent transferases superfamily protein	4.007	8	2	0	0	0	0	0	0	48799000	0	0
AT2G17700.1	ACT-like protein tyrosine kinase family protein	2.3405	2	2	0	0	37419000	0	0	0	25720000	0	0
AT2G17720.1	2-oxoglutarate (2OG) and Fe(II)-dependent oxygenase superfamily protein	12.218	4	4	113300000	59794000	37522000	64753000	67979000	90362000	65635000	81396000	99697000
AT2G17760.1	Eukaryotic aspartyl protease family protein	3.9177	1	1	0	0	0	0	0	0	0	0	15222000
AT2G17790.1	VPS35 homolog A	4.6547	2	2	0	0	27619000	23929000	25206000	0	17911000	0	18928000
AT2G17840.1	Senescence/dehydration-associated protein-related	76.809	14;1	14;1	441140000	388510000	442400000	473280000	495040000	466680000	457230000	463010000	487270000
AT2G17870.1	cold shock domain protein 3	43.871	2	2	0	37377000	30777000	34573000	54303000	0	33152000	39728000	46478000
AT2G17980.1	Sec1/munc18-like (SM) proteins superfamily	54.597	9	9	132470000	186180000	213950000	188050000	151220000	200490000	176940000	178800000	147560000
AT2G18020.1	Ribosomal protein L2 family	183.67	9;2	4;0	2617500000	2376900000	1822800000	2650000000	2421900000	2126800000	2518200000	2913300000	3386300000
AT2G18040.1	peptidylprolyl cis/trans isomerase, NIMA-interacting 1	32.556	5	5	243450000	187070000	169290000	187890000	181230000	149980000	206550000	169900000	193990000
AT2G18110.1	Translation elongation factor EF1B/ribosomal protein S6 family protein	34.826	10	4	143270000	162010000	189390000	177870000	144920000	155380000	161580000	184990000	114710000
AT2G18150.1;AT2G18140.1	Peroxidase superfamily protein ; Peroxidase superfamily protein	3.4114	3;2	1;1	0	0	0	0	12412000	0	0	0	0
AT2G18230.1	pyrophosphorylase 2	26.562	5	4	55835000	52187000	109460000	77926000	58107000	70621000	61999000	62202000	39584000
AT2G18330.1	AAA-type ATPase family protein	1.6401	2	2	0	0	0	0	5880000	0	0	0	8880200
AT2G18360.1	alpha/beta-Hydrolases superfamily protein	4.0019	1	1	0	0	0	0	0	0	0	0	6094100
AT2G18510.1	RNA-binding (RRM/RBD/RNP motifs) family protein	2.0004	1	1	0	0	0	0	0	0	0	0	8085600
AT2G18730.1	diacylglycerol kinase 3	1.5961	2	2	0	0	0	0	0	0	0	0	36866000
AT2G18740.1;AT2G18740.2;AT4G30330.1	Small nuclear ribonucleoprotein family protein ; Small nuclear ribonucleoprotein family protein ; Small nuclear ribonucleoprotein family protein	4.6054	2;1;1	2;1;1	0	0	0	0	0	0	0	3868000	0
AT2G18790.1;AT4G16250.1	phytochrome B ; phytochrome D	6.8449	4;2	4;2	20306000	27676000	13903000	25675000	24424000	26594000	22994000	25307000	41414000
AT2G18960.1	H(+)-ATPase 1	10.718	29;6;4;4;4	5;0;0;0;0	243060000	149010000	141280000	175700000	221040000	183430000	165950000	181510000	191490000
AT2G18980.1	Peroxidase superfamily protein	96.581	12	8	203700000	174200000	188410000	208430000	186580000	191600000	188450000	186090000	184470000
AT2G19480.3;AT2G19480.2;AT2G19480.1	nucleosome assembly protein 1;2 ; nucleosome assembly protein 1;2 ; nucleosome assembly protein 1;2	174.34	8;8;8	7;7;7	497290000	425160000	328950000	466860000	419050000	457870000	379030000	391750000	480080000
AT2G19520.1	Transducin family protein / WD-40 repeat family protein	44.464	6;1	6;1	171920000	148100000	163590000	147920000	147440000	152000000	172750000	169680000	159380000
AT2G19540.1	Transducin family protein / WD-40 repeat family protein	2.4439	2	2	0	0	0	0	0	0	30693000	0	0
AT2G19570.1	cytidine deaminase 1	9.9518	6	6	148690000	175240000	132480000	243910000	115120000	159510000	158470000	268860000	242020000
AT2G19670.1	protein arginine methyltransferase 1A	1.9914	2	2	0	0	0	0	0	17481000	0	0	0
AT2G19730.3;AT2G19730.2;AT2G19730.1	Ribosomal L28e protein family ; Ribosomal L28e protein family ; Ribosomal L28e protein family	79.881	6;6;6	5;5;5	793070000	623660000	549400000	778680000	945720000	685350000	627340000	699250000	706470000
AT5G56710.1;AT4G26230.1;AT2G19740.1;AT5G56710.2	Ribosomal protein L31e family protein ; Ribosomal protein L31e family protein ; Ribosomal protein L31e family protein ; Ribosomal protein L31e family protein	68.166	3;3;3;2	3;3;3;2	209210000	259180000	262880000	226990000	331470000	410630000	330610000	266390000	336510000
AT5G56670.1;AT4G29390.1;AT2G19750.1	Ribosomal protein S30 family protein ; Ribosomal protein S30 family protein ; Ribosomal protein S30 family protein	4.2411	2;2;2	2;2;2	0	0	0	0	111200000	101090000	94159000	111140000	86913000
AT2G19760.1	profilin 1	323.31	7	7	1928500000	1480200000	1583300000	1515500000	1376500000	1537500000	1338000000	1307900000	1324000000
AT2G19830.1;AT4G29160.3;AT4G29160.1	SNF7 family protein ; SNF7 family protein ; SNF7 family protein	2.7941	1;1;1	1;1;1	0	0	0	0	0	0	0	0	41523000
AT2G19940.2;AT2G19940.1	oxidoreductases, acting on the aldehyde or oxo group of donors, NAD or NADP as acceptor;copper ion binding ; oxidoreductases, acting on the aldehyde or oxo group of donors, NAD or NADP as acceptor;copper ion binding	16.412	7;7	7;7	221050000	203390000	228450000	193890000	161540000	171070000	189070000	160900000	180280000
AT4G29040.1;AT2G20140.1	regulatory particle AAA-ATPase 2A ; AAA-type ATPase family protein	215.83	14;14	14;14	576760000	550520000	720250000	594760000	554920000	619040000	489020000	498340000	449520000
AT2G20190.1	CLIP-associated protein	12.526	3	3	16177000	0	18152000	12116000	8642200	0	33171000	11032000	17393000
AT2G20270.1;AT2G20270.2	Thioredoxin superfamily protein ; Thioredoxin superfamily protein	38.514	3;2	3;2	111560000	104250000	142240000	136760000	113530000	169570000	102580000	147390000	107110000
AT2G20360.1	NAD(P)-binding Rossmann-fold superfamily protein	152.32	16	16	592480000	721740000	735950000	710080000	705260000	722500000	607320000	647440000	532960000
AT2G20420.1	ATP citrate lyase (ACL) family protein	323.31	16	16	2854100000	2611000000	2780000000	3346000000	2773600000	3034800000	3016300000	3027400000	3172600000
AT2G20450.1	Ribosomal protein L14	4.6206	7	2	92612000	0	87840000	95793000	0	95154000	0	107770000	0
AT2G20530.2;AT2G20530.1	prohibitin 6 ; prohibitin 6	18.238	7;7	4;4	75861000	115690000	86293000	148720000	123240000	99415000	82940000	99611000	111270000
AT2G20580.1	26S proteasome regulatory subunit S2 1A	103.75	26	17	530650000	597050000	787690000	668330000	611330000	628010000	568700000	553170000	587320000
AT2G20610.1;AT2G20610.2	Tyrosine transaminase family protein ; Tyrosine transaminase family protein	42.453	13;9	13;9	295840000	243070000	361870000	247640000	270310000	314580000	328560000	297840000	262150000
AT2G20630.1;AT2G20630.2	PP2C induced by AVRRPM1 ; PP2C induced by AVRRPM1	88.17	11;11	7;7	514490000	530230000	583410000	525460000	453290000	601520000	515370000	553240000	443660000
AT2G20750.1	expansin B1	10.364	1	1	32587000	56732000	26543000	0	32309000	33524000	36995000	35316000	61297000
AT2G20760.1	Clathrin light chain protein	10.641	4;1	4;1	139980000	133900000	71415000	105850000	136530000	89422000	119320000	93591000	122550000
AT2G20930.1	SNARE-like superfamily protein	15.524	1	1	0	0	0	0	0	0	0	0	30267000
AT2G20990.1;AT2G20990.3;AT2G20990.2	synaptotagmin A ; synaptotagmin A ; synaptotagmin A	73.665	13;13;12;2	13;13;12;2	267310000	317150000	315270000	311640000	274600000	334060000	296210000	265070000	243940000
AT2G21045.1	Rhodanese/Cell cycle control phosphatase superfamily protein	133.39	5	5	426180000	338730000	376850000	401440000	463830000	444670000	484220000	481280000	366540000
AT2G21060.1	glycine-rich protein 2B	110.04	2	2	139730000	159910000	118690000	143910000	140490000	136300000	93444000	113070000	130100000
AT2G21130.1	Cyclophilin-like peptidyl-prolyl cis-trans isomerase family protein	5.5261	8	2	51811000	53540000	46751000	55920000	0	60789000	53329000	63737000	58989000
AT2G21150.1	XAP5 family protein	1.4383	1	1	0	0	0	0	0	0	0	0	13085000
AT2G21160.1;AT2G21160.2	Translocon-associated protein (TRAP), alpha subunit ; Translocon-associated protein (TRAP), alpha subunit	7.7333	2;1	2;1	494960000	447870000	560070000	462800000	453300000	507510000	387130000	446270000	325390000
AT2G21170.1;AT2G21170.2	triosephosphate isomerase ; triosephosphate isomerase	23.792	6;5	5;5	95467000	103540000	131250000	128690000	114640000	123020000	160360000	183140000	126480000
AT2G21250.1;AT2G21250.2	NAD(P)-linked oxidoreductase superfamily protein ; NAD(P)-linked oxidoreductase superfamily protein	56.299	10;7;4	10;7;4	288630000	319180000	406800000	423490000	326540000	444070000	349380000	358090000	298490000
AT2G21270.2;AT2G21270.1;AT2G21270.3	ubiquitin fusion degradation 1 ; ubiquitin fusion degradation 1 ; ubiquitin fusion degradation 1	6.8919	2;2;2	2;2;2	0	0	0	49173000	0	0	0	39633000	0
AT2G21390.1	Coatomer, alpha subunit	226.24	35	17	1269400000	1239400000	1370600000	1266500000	1259600000	1303400000	1291700000	1294700000	1303000000
AT2G21410.1	vacuolar proton ATPase A2	3.8952	10	5	0	49107000	0	66548000	0	0	0	0	0
AT2G21430.1	Papain family cysteine protease	1.2384	1	1	0	0	0	0	0	0	0	49186000	0
AT2G21470.1;AT2G21470.3;AT2G21470.2	SUMO-activating enzyme 2 ; SUMO-activating enzyme 2 ; SUMO-activating enzyme 2	24.115	4;4;4	4;4;4	21723000	32505000	46412000	30937000	34529000	31978000	33478000	31809000	19059000
AT2G21580.2;AT2G21580.1	Ribosomal protein S25 family protein ; Ribosomal protein S25 family protein	7.4933	3;3	1;1	0	0	0	0	0	0	0	0	27784000
AT2G21620.1;AT2G21620.2	Adenine nucleotide alpha hydrolases-like superfamily protein ; Adenine nucleotide alpha hydrolases-like superfamily protein	165.32	12;11	12;11	618230000	619040000	675160000	690290000	595260000	661940000	802150000	794410000	881300000
AT2G21660.1;AT2G21660.2	cold, circadian rhythm, and rna binding 2 ; cold, circadian rhythm, and rna binding 2	268.27	9;8	7;6	1548600000	1652700000	1676600000	1580500000	1882600000	2002900000	1815000000	1576000000	1599200000
AT2G21870.1;AT2G21870.2	copper ion binding;cobalt ion binding;zinc ion binding ; copper ion binding;cobalt ion binding;zinc ion binding	156.27	12;11	12;11	1469800000	1427900000	1113300000	1365700000	1544300000	1426100000	1353300000	1435800000	1312100000
AT2G21880.1;AT2G21880.2	RAB GTPase homolog 7A ; RAB GTPase homolog 7A	3.0533	3;2	1;0	0	0	0	0	0	0	0	15732000	0
AT2G22125.1	binding	64.885	15	15	177210000	138960000	134330000	148670000	149070000	137860000	159810000	135310000	126250000
AT2G22170.1	Lipase/lipooxygenase, PLAT/LH2 family protein	289.95	5	4	1230900000	780990000	918440000	826140000	745690000	675310000	755000000	774530000	865020000
AT2G22230.1	Thioesterase superfamily protein	2.4749	3	2	0	0	0	0	51335000	0	0	0	0
AT2G22250.1;AT2G22250.3;AT2G22250.2	aspartate aminotransferase ; aspartate aminotransferase ; aspartate aminotransferase	66.351	10;10;10	10;10;10	214080000	229990000	272750000	251550000	199400000	225780000	334320000	276490000	298680000
AT2G22400.1	S-adenosyl-L-methionine-dependent methyltransferases superfamily protein	19.455	6	5	52620000	59217000	58110000	64285000	60562000	65045000	56796000	54588000	43158000
AT2G22420.1	Peroxidase superfamily protein	3.1511	1	1	0	0	0	0	0	0	0	0	12304000
AT2G22450.1;AT5G64300.1	riboflavin biosynthesis protein, putative ; GTP cyclohydrolase II	8.2748	1;1	1;1	0	0	0	0	0	0	0	5774200	0
AT2G22480.1	phosphofructokinase 5	89.903	9	9	347900000	362790000	395760000	360880000	372330000	428090000	355670000	420770000	413850000
AT2G22660.1;AT2G22660.2	Protein of unknown function (duplicated DUF1399) ; Protein of unknown function (duplicated DUF1399)	2.3619	1;1	1;1	0	0	0	0	0	0	8708200	0	0
AT2G22780.1	peroxisomal NAD-malate dehydrogenase 1	262.32	15	15	765230000	793030000	1029300000	896990000	709980000	815190000	868910000	784540000	795720000
AT2G22920.1;AT2G22920.2;AT2G22920.3	serine carboxypeptidase-like 12 ; serine carboxypeptidase-like 12 ; serine carboxypeptidase-like 12	20.779	2;2;1	1;1;0	89960000	79950000	87888000	71483000	78613000	84443000	70061000	85902000	65184000
AT2G22970.1;AT2G22970.3;AT2G22970.2	serine carboxypeptidase-like 11 ; serine carboxypeptidase-like 11 ; serine carboxypeptidase-like 11	1.5066	2;2;1	1;1;1	0	0	0	0	0	0	0	0	14549000
AT2G23070.1	Protein kinase superfamily protein	10.982	5	3	53965000	53265000	45696000	62074000	57981000	55141000	71680000	66231000	91816000
AT2G23090.1	Uncharacterised protein family SERF	2.8224	1	1	0	0	0	0	0	0	0	0	11847000
AT2G23350.1	poly(A) binding protein 4	208.46	14;3;3	10;0;0	526410000	595950000	649490000	624470000	650860000	668700000	624440000	617700000	617720000
AT2G23420.1	nicotinate phosphoribosyltransferase 2	1.259	1	1	0	0	0	0	0	0	0	0	2674500
AT2G23540.1	GDSL-like Lipase/Acylhydrolase superfamily protein	83.671	3	3	110200000	104680000	80752000	91882000	75271000	111410000	76946000	78108000	82191000
AT2G23630.1	SKU5 similar 16	4.3022	4	2	17088000	0	25777000	0	0	0	0	19324000	23249000
AT2G23820.1;AT2G23820.2	Metal-dependent phosphohydrolase ; Metal-dependent phosphohydrolase	1.4854	2;2	2;2	0	0	0	0	0	0	0	8043100	0
AT2G23930.2;AT3G11500.1;AT2G23930.1	probable small nuclear ribonucleoprotein G ; Small nuclear ribonucleoprotein family protein ; probable small nuclear ribonucleoprotein G	20.823	2;2;2	2;2;2	0	0	0	0	0	0	0	0	25272000
AT4G30620.1;AT2G24020.2;AT2G24020.1	Uncharacterised BCR, YbaB family COG0718 ; Uncharacterised BCR, YbaB family COG0718 ; Uncharacterised BCR, YbaB family COG0718	2.3453	1;1;1	1;1;1	0	0	0	0	0	0	0	0	17502000
AT2G24050.1	MIF4G domain-containing protein / MA3 domain-containing protein	6.4432	4	4	49483000	0	51616000	0	0	47926000	0	34105000	34302000
AT2G24180.1	cytochrome p450 71b6	40.796	8	8	98829000	107010000	102680000	114530000	116100000	132460000	139630000	118760000	145180000
AT2G24200.2;AT2G24200.1;AT2G24200.3	Cytosol aminopeptidase family protein ; Cytosol aminopeptidase family protein ; Cytosol aminopeptidase family protein	323.31	29;29;26	20;20;17	2595800000	2445800000	3298600000	2631100000	2504100000	2571500000	2488000000	2781000000	2365600000
AT2G24420.2;AT2G24420.1	DNA repair ATPase-related ; DNA repair ATPase-related	35.715	4;4	4;4	53276000	53875000	37026000	46738000	52004000	0	57008000	46778000	80096000
AT2G24580.1	FAD-dependent oxidoreductase family protein	69.05	10	10	359340000	404550000	421270000	390740000	331850000	388250000	321540000	298890000	349090000
AT2G24590.1	RNA recognition motif and CCHC-type zinc finger domains containing protein	3.5175	2	1	0	52212000	70597000	0	0	79280000	0	101040000	0
AT2G24765.1;AT2G24765.2	ADP-ribosylation factor 3 ; ADP-ribosylation factor 3	9.1922	4;3	4;3	72740000	76442000	81508000	74501000	79408000	122010000	71023000	85972000	72824000
AT2G24940.1	membrane-associated progesterone binding protein 2	108.53	6	6	813130000	818140000	691450000	778780000	865950000	836230000	727830000	739630000	790010000
AT2G25060.1	early nodulin-like protein 14	3.4411	2	2	0	31007000	36464000	37123000	35703000	29503000	35265000	37311000	28972000
AT2G25070.1	Protein phosphatase 2C family protein	1.6699	1	1	0	0	0	0	0	0	0	0	13961000
AT2G25080.1	glutathione peroxidase 1	4.701	4	3	25743000	0	0	0	0	0	27631000	25165000	20735000
AT2G25110.1	stromal cell-derived factor 2-like protein precursor	3.7676	1	1	0	0	0	0	0	0	0	0	27046000
AT2G25160.1	cytochrome P450, family 82, subfamily F, polypeptide 1	13.972	5	5	64177000	72228000	49638000	78616000	56475000	98287000	54141000	59448000	41480000
AT2G25210.1;AT4G31985.1	Ribosomal protein L39 family protein ; Ribosomal protein L39 family protein	1.6364	1;1	1;1	0	0	0	0	0	0	0	0	36543000
AT2G25280.1	CONTAINS InterPro DOMAIN/s: UPF0103/Mediator of ErbB2-driven cell motility (Memo), related (InterPro:IPR002737); Has 1074 Blast hits to 1072 proteins in 474 species: Archae - 213; Bacteria - 366; Metazoa - 159; Fungi - 135; Plants - 54; Viruses - 0; Other	56.714	7	7	100580000	67282000	121770000	108120000	44669000	76615000	94896000	71057000	63362000
AT2G25430.1	epsin N-terminal homology (ENTH) domain-containing protein / clathrin assembly protein-related	15.008	7	3	59797000	96506000	97096000	84136000	78242000	70324000	85972000	74533000	52139000
AT2G25450.1	2-oxoglutarate (2OG) and Fe(II)-dependent oxygenase superfamily protein	161.22	7	7	227440000	200860000	282390000	234190000	273680000	254340000	261990000	258680000	237380000
AT2G25670.2;AT2G25670.1	BEST Arabidopsis thaliana protein match is: copper ion binding (TAIR:AT4G32610.1); Has 43784 Blast hits to 26928 proteins in 1799 species: Archae - 86; Bacteria - 6347; Metazoa - 15971; Fungi - 5398; Plants - 1931; Viruses - 259; Other Eukaryotes - 13792	34.522	1;1	1;1	0	0	0	0	0	0	0	0	9180000
AT2G25710.2;AT2G25710.1	holocarboxylase synthase 1 ; holocarboxylase synthase 1	1.8604	2;2	2;2	37493000	38353000	34835000	39259000	40832000	0	43176000	0	0
AT2G25800.1	Protein of unknown function (DUF810)	6.0555	4	4	19123000	21778000	20173000	21639000	19982000	23700000	18888000	22045000	22511000
AT2G25870.1	haloacid dehalogenase-like hydrolase family protein	1.6725	1	1	0	0	0	0	0	0	0	0	55426000
AT2G25950.1	Protein of unknown function (DUF1000)	23.196	3	3	76247000	74576000	125610000	82144000	83520000	94483000	66285000	81279000	94190000
AT2G25970.1	KH domain-containing protein	26.969	4	4	373510000	365380000	293720000	344910000	319750000	265930000	347330000	283330000	366340000
AT2G25980.1	Mannose-binding lectin superfamily protein	77.935	12;1;1;1	12;1;1;1	460960000	513770000	456770000	516100000	571870000	550580000	508660000	530930000	551090000
AT2G26080.1	glycine decarboxylase P-protein 2	211.94	22	12	952610000	784890000	843040000	864250000	730560000	755930000	774810000	771920000	783580000
AT2G26140.1	FTSH protease 4	3.5712	2	2	0	0	0	0	0	0	0	0	18027000
AT2G26230.1	uricase / urate oxidase / nodulin 35, putative	39.806	8	8	176780000	155960000	208730000	180160000	124490000	154190000	197320000	169350000	253920000
AT2G26240.1	Transmembrane proteins 14C	3.6527	1	1	0	0	0	0	0	0	0	1051900	0
AT2G26570.1	Plant protein of unknown function (DUF827)	5.6822	2	2	0	17664000	0	0	14714000	0	18760000	23789000	15120000
AT2G26590.3;AT2G26590.2;AT2G26590.1	regulatory particle non-ATPase 13 ; regulatory particle non-ATPase 13 ; regulatory particle non-ATPase 13	39.32	6;6;6	6;6;6	0	34962000	68074000	30016000	26867000	28033000	52288000	38641000	43660000
AT2G26650.1	K+ transporter 1	2.1348	1	1	0	0	0	0	0	0	0	0	2334100
AT2G26730.1	Leucine-rich repeat protein kinase family protein	5.8202	3	3	31661000	0	50270000	51563000	40810000	0	28594000	0	38897000
AT2G26780.1	ARM repeat superfamily protein	7.0562	6	6	36104000	19043000	25874000	27432000	0	26981000	41106000	27112000	22322000
AT2G26830.1	Protein kinase superfamily protein	2.5802	2	2	0	0	0	45341000	36074000	54165000	45225000	39476000	38221000
AT2G26890.1	DNAJ heat shock N-terminal domain-containing protein	1.1806	2	2	0	0	0	17805000	0	0	25700000	23791000	0
AT2G26990.1	proteasome family protein	9.1521	2	2	30145000	46096000	54672000	45240000	54517000	51919000	43618000	49930000	25478000
AT2G27020.1	20S proteasome alpha subunit G1	21.627	7	7	255390000	265100000	206630000	338870000	310790000	279200000	365010000	285290000	427780000
AT5G21274.1;AT3G56800.1;AT3G43810.1;AT2G41110.1;AT2G27030.1;AT2G41110.2;AT2G27030.3;AT2G27030.2	calmodulin 6 ; calmodulin 3 ; calmodulin 7 ; calmodulin 2 ; calmodulin 5 ; calmodulin 2 ; calmodulin 5 ; calmodulin 5	188.03	8;8;8;8;8;8;8;5	3;3;3;3;3;3;3;2	844330000	765170000	727030000	626300000	666490000	830360000	565600000	395810000	404350000
AT2G27040.2;AT2G27040.1	Argonaute family protein ; Argonaute family protein	4.2689	5;5	5;5	0	95599000	109110000	93665000	81355000	0	74128000	77471000	86001000
AT2G27100.1	C2H2 zinc-finger protein SERRATE (SE)	27.301	3	3	41654000	52832000	37776000	45452000	43153000	50196000	57923000	49129000	54910000
AT2G27190.1	purple acid phosphatase 12	7.5379	2	2	0	0	0	0	0	0	0	0	45665000
AT2G27210.2;AT2G27210.1	BRI1 suppressor 1 (BSU1)-like 3 ; BRI1 suppressor 1 (BSU1)-like 3	8.0395	5;5	1;1	0	0	0	0	0	0	0	0	6002600
AT2G27450.1;AT2G27450.2	nitrilase-like protein 1 ; nitrilase-like protein 1	11.054	4;4	4;4	0	54920000	57458000	58579000	41520000	0	0	82578000	0
AT2G27460.1	sec23/sec24 transport family protein	5.1863	2	2	0	0	0	0	0	0	10383000	0	0
AT2G27490.2;AT2G27490.1	dephospho-CoA kinase family ; dephospho-CoA kinase family	1.8819	1;1	1;1	0	0	0	0	0	0	2835800	0	0
AT2G27510.1	ferredoxin 3	323.31	3	3	1204300000	1018400000	1341900000	1103700000	1540800000	1198000000	1208600000	1253200000	1004900000
AT2G27530.2;AT2G27530.1	Ribosomal protein L1p/L10e family ; Ribosomal protein L1p/L10e family	296.77	8;8	5;5	1596000000	1659500000	1789600000	2055700000	1977100000	1894100000	1876200000	2142900000	2104200000
AT2G27600.1	AAA-type ATPase family protein	15.416	1	1	0	0	0	0	0	0	0	0	14315000
AT2G27710.3;AT2G27710.2;AT2G27710.1;AT2G27710.4	60S acidic ribosomal protein family ; 60S acidic ribosomal protein family ; 60S acidic ribosomal protein family ; 60S acidic ribosomal protein family	309	5;5;5;4	3;3;3;2	2699100000	2603600000	2691900000	2922500000	2730100000	3008800000	2398600000	2547800000	2429200000
AT2G27720.1;AT2G27720.3;AT2G27720.2	60S acidic ribosomal protein family ; 60S acidic ribosomal protein family ; 60S acidic ribosomal protein family	181.68	5;4;4	3;2;2	254450000	344380000	424910000	326690000	343420000	462070000	472620000	492940000	387010000
AT2G27730.1	copper ion binding	1.856	1	1	0	0	0	0	0	0	0	0	907430
AT2G27840.2;AT2G27840.1	histone deacetylase-related / HD-related ; histone deacetylase-related / HD-related	1.7592	1;1	1;1	0	0	0	0	0	0	0	11781000	0
AT2G27860.1	UDP-D-apiose/UDP-D-xylose synthase 1	77.169	17	6	322910000	273410000	285000000	234250000	293730000	310990000	251580000	371490000	259940000
AT2G27970.1;AT2G27960.1	CDK-subunit 2 ; cyclin-dependent kinase-subunit 1	3.8444	2;2	2;2	0	0	0	0	0	0	0	0	39236000
AT2G28000.1	chaperonin-60alpha	210.27	17	17	1042800000	1139700000	1222600000	1234400000	1421600000	1289600000	1276700000	1341800000	1258100000
AT2G28520.1	vacuolar proton ATPase A1	1.2164	3	3	0	0	0	0	0	0	31390000	0	0
AT2G28760.3;AT2G28760.2;AT2G28760.1	UDP-XYL synthase 6 ; UDP-XYL synthase 6 ; UDP-XYL synthase 6	15.602	9;9;9	2;2;2	0	0	84727000	70738000	51913000	0	67748000	0	54575000
AT2G28790.1	Pathogenesis-related thaumatin superfamily protein	4.5877	1	1	0	0	0	0	0	0	0	0	30151000
AT2G28900.1	outer plastid envelope protein 16-1	2.214	1	1	0	0	0	0	0	0	0	0	20712000
AT2G29080.1	FTSH protease 3	5.7462	4	4	0	0	0	54242000	50183000	0	0	49075000	42927000
AT2G29140.1	pumilio 3	-2	1	1	0	0	0	0	0	0	0	0	2368800000
AT2G29330.1	tropinone reductase	29.781	2	2	0	0	0	0	0	0	0	0	23951000
AT2G29420.1	glutathione S-transferase tau 7	31.386	7	7	352680000	346180000	374050000	383170000	301720000	291070000	388050000	345340000	314620000
AT2G29450.1	glutathione S-transferase tau 5	5.0579	3;1	3;1	0	0	0	0	0	0	0	0	32678000
AT2G29480.1	glutathione S-transferase tau 2	8.177	1	1	0	0	0	0	0	0	0	0	0
AT2G29490.1	glutathione S-transferase TAU 1	43.077	9	9	247480000	130330000	321860000	241680000	182220000	178700000	219890000	246420000	221430000
AT2G29530.2;AT2G29530.1;AT2G29530.3	Tim10/DDP family zinc finger protein ; Tim10/DDP family zinc finger protein ; Tim10/DDP family zinc finger protein	97.064	2;2;2	2;2;2	83854000	65752000	67228000	77152000	76204000	90905000	79277000	74951000	102570000
AT2G29550.1	tubulin beta-7 chain	31.333	22	2	124780000	115350000	137970000	107510000	85955000	115020000	101980000	102450000	99886000
AT2G29560.1	cytosolic enolase	23.389	7	7	124410000	113120000	135570000	144120000	115460000	127180000	119480000	125430000	118680000
AT3G55870.1;AT2G29690.1;AT5G05730.1;AT5G05730.2	ADC synthase superfamily protein ; anthranilate synthase 2 ; anthranilate synthase alpha subunit 1 ; anthranilate synthase alpha subunit 1	1.8804	2;2;1;1	2;2;1;1	0	0	0	0	0	13727000	0	0	0
AT2G29700.1	pleckstrin homologue 1	2.0616	1	1	0	0	0	0	0	0	0	0	20032000
AT2G29730.1	UDP-glucosyl transferase 71D1	3.1035	2	2	0	0	0	0	0	0	0	0	5741300
AT2G29750.1	UDP-glucosyl transferase 71C1	9.0636	6	5	82906000	55934000	0	60737000	61548000	53896000	50965000	46710000	50470000
AT2G29900.1	Presenilin-2	2.0303	1	1	0	0	0	0	0	0	0	0	4445800
AT2G29960.1;AT2G29960.2	cyclophilin 5 ; cyclophilin 5	22.128	7;6	6;5	326990000	360090000	346990000	374910000	296000000	336370000	353880000	330900000	312870000
AT2G30050.1	transducin family protein / WD-40 repeat family protein	141.92	8	6	387710000	334810000	394840000	360830000	323330000	329490000	326760000	336870000	405330000
AT2G30060.1	Pleckstrin homology (PH) domain superfamily protein	181.37	5	4	305350000	345460000	247190000	319770000	307980000	331490000	395650000	312520000	464510000
AT2G30105.1	CONTAINS InterPro DOMAIN/s: Leucine-rich repeat, typical subtype (InterPro:IPR003591), Leucine-rich repeat (InterPro:IPR001611), Ubiquitin (InterPro:IPR000626), Ubiquitin supergroup (InterPro:IPR019955); BEST Arabidopsis thaliana protein match is: Leucine	1.2831	1	1	0	0	0	0	0	0	6096400	0	0
AT2G30110.1	ubiquitin-activating enzyme 1	323.31	29	27	1495300000	1430600000	1643000000	1704000000	1493300000	1558600000	1554300000	1507900000	1623200000
AT2G30200.1;AT2G30200.2	catalytics;transferases;[acyl-carrier-protein] S-malonyltransferases;binding ; catalytics;transferases;[acyl-carrier-protein] S-malonyltransferases;binding	120.89	12;11	12;11	480260000	426230000	515880000	415680000	410540000	412560000	417120000	494260000	418980000
AT2G30210.1	laccase 3	12.271	1	1	0	0	0	0	0	0	0	0	21189000
AT2G30260.1	U2 small nuclear ribonucleoprotein B	2.8877	1	1	56719000	0	0	62009000	51210000	78208000	56502000	65737000	62318000
AT2G30410.2;AT2G30410.1	tubulin folding cofactor A (KIESEL) ; tubulin folding cofactor A (KIESEL)	27.643	1;1	1;1	0	0	0	0	0	0	0	0	26305000
AT2G30490.1	cinnamate-4-hydroxylase	323.31	24	23	1732500000	1536900000	1809700000	1574100000	1814400000	1803000000	1559000000	1692600000	1325100000
AT2G30620.2;AT2G30620.1	winged-helix DNA-binding transcription factor family protein ; winged-helix DNA-binding transcription factor family protein	32.002	2;2	2;2	104590000	99368000	105750000	108190000	88195000	103340000	102270000	84594000	95258000
AT2G30740.1;AT1G06700.2;AT1G06700.1;AT2G41970.1;AT3G59350.2;AT2G43230.1;AT3G59350.3;AT3G59350.1;AT2G43230.2	Protein kinase superfamily protein ; Protein kinase superfamily protein ; Protein kinase superfamily protein ; Protein kinase superfamily protein ; Protein kinase superfamily protein ; Protein kinase superfamily protein ; Protein kinase superfamily protei	4.6311	4;3;3;2;2;2;2;2;2;1	3;2;2;1;1;1;1;1;1;1	41593000	51426000	70279000	59491000	58414000	52093000	31525000	53754000	48859000
AT2G30860.1;AT2G30860.2	glutathione S-transferase PHI 9 ; glutathione S-transferase PHI 9	266.73	11;8	9;6	10343000000	10445000000	12625000000	10129000000	9813600000	8708400000	11219000000	8386200000	11549000000
AT2G30870.1	glutathione S-transferase PHI 10	189.97	11	9	4009700000	4262700000	4262600000	4132000000	3950400000	3869700000	3875500000	3429500000	3518800000
AT2G30880.2;AT2G30880.1	Pleckstrin homology (PH) domain-containing protein ; Pleckstrin homology (PH) domain-containing protein	2.5361	2;2	2;2	36324000	30846000	38815000	35503000	35102000	37597000	37656000	38082000	30014000
AT2G30930.1	unknown protein; FUNCTIONS IN: molecular_function unknown; INVOLVED IN: biological_process unknown; LOCATED IN: chloroplast, plasma membrane, membrane; EXPRESSED IN: 24 plant structures; EXPRESSED DURING: 14 growth stages; BEST Arabidopsis thaliana protei	233.63	3	3	503400000	402480000	362200000	370530000	414590000	359930000	330600000	398960000	426930000
AT2G30970.2;AT2G30970.1	aspartate aminotransferase 1 ; aspartate aminotransferase 1	208.78	20;20	20;20	1279600000	1121000000	1237400000	1280100000	1178700000	1242400000	1216000000	1297300000	1438700000
AT2G31060.2;AT2G31060.3;AT2G31060.1	elongation factor family protein ; elongation factor family protein ; elongation factor family protein	5.5291	4;4;3	4;4;3	0	34812000	19100000	25592000	21915000	24214000	38712000	21224000	28629000
AT2G31390.1	pfkB-like carbohydrate kinase family protein	323.31	17;5;5;2	14;4;3;1	5044800000	5029100000	6505100000	5540200000	4711300000	5346500000	4921100000	5051000000	4626800000
AT2G31570.1	glutathione peroxidase 2	97.637	5	4	474970000	424090000	579790000	560600000	553890000	461310000	450930000	643730000	515170000
AT2G31610.1	Ribosomal protein S3 family protein	5.4806	15	1	259150000	193720000	164850000	187570000	222110000	132970000	218620000	244910000	246760000
AT2G31660.1	ARM repeat superfamily protein	71.7	7	7	62172000	143340000	184000000	105930000	146600000	132670000	127380000	123100000	92263000
AT2G31670.1	Stress responsive alpha-beta barrel domain protein	152.7	8	8	253730000	344960000	437430000	427250000	439750000	451850000	372660000	368220000	361420000
AT2G31740.1	S-adenosyl-L-methionine-dependent methyltransferases superfamily protein	1.3179	1	1	0	0	0	0	0	0	0	0	120010000
AT2G31750.1	UDP-glucosyl transferase 74D1	91.36	11	11	517210000	654750000	698100000	585620000	571010000	717840000	592390000	533240000	442710000
AT2G31790.1	UDP-Glycosyltransferase superfamily protein	7.1087	2	2	0	20839000	35911000	0	42517000	0	40059000	42231000	35237000
AT2G31810.1;AT2G31810.2;AT2G31810.3	ACT domain-containing small subunit of acetolactate synthase protein ; ACT domain-containing small subunit of acetolactate synthase protein ; ACT domain-containing small subunit of acetolactate synthase protein	5.8692	4;3;3	4;3;3	28088000	34253000	41366000	31522000	38802000	28299000	37117000	43374000	43432000
AT2G32060.3;AT2G32060.2;AT2G32060.1	Ribosomal protein L7Ae/L30e/S12e/Gadd45 family protein ; Ribosomal protein L7Ae/L30e/S12e/Gadd45 family protein ; Ribosomal protein L7Ae/L30e/S12e/Gadd45 family protein	38.21	6;6;6	4;4;4	1431500000	1463200000	1361700000	1287900000	1431800000	1434000000	1747000000	1867800000	1811700000
AT2G32080.2;AT2G32080.1	purin-rich alpha 1 ; purin-rich alpha 1	7.1583	6;5	6;5	114600000	133940000	128370000	127470000	125590000	133980000	110940000	136730000	103220000
AT2G32240.1	FUNCTIONS IN: molecular_function unknown; INVOLVED IN: response to cadmium ion; LOCATED IN: plasma membrane; EXPRESSED IN: 25 plant structures; EXPRESSED DURING: 13 growth stages; CONTAINS InterPro DOMAIN/s: Prefoldin (InterPro:IPR009053); BEST Arabidopsi	323.31	40	39	1458000000	1589500000	1370000000	1826500000	1763600000	1784800000	1723000000	1637100000	1808700000
AT2G32260.1	phosphorylcholine cytidylyltransferase	11.703	5	5	57618000	50884000	58557000	58905000	53173000	85384000	0	52032000	115790000
AT2G32520.1	alpha/beta-Hydrolases superfamily protein	23.212	5	5	252550000	228120000	283870000	234280000	157880000	255450000	325000000	320260000	277690000
AT2G32600.1	hydroxyproline-rich glycoprotein family protein	50.008	2	2	0	0	0	0	0	0	0	0	35952000
AT2G32720.1	cytochrome B5 isoform B	1.4091	2	2	0	0	0	0	0	0	0	0	58364000
AT2G32730.1	26S proteasome regulatory complex, non-ATPase subcomplex, Rpn2/Psmd1 subunit	88.24	14	9	647140000	681540000	658840000	714630000	700810000	665370000	788600000	736070000	862540000
AT2G32850.1;AT2G32850.2	Protein kinase superfamily protein ; Protein kinase superfamily protein	1.7302	1;1	1;1	0	0	0	0	0	0	0	0	11444000
AT2G32900.1	centromere/kinetochore protein, putative (ZW10)	2.2565	2	2	0	0	0	0	0	0	0	0	20379000
AT2G32920.1	PDI-like 2-3	86.811	5	5	120530000	99741000	127800000	99945000	149970000	119950000	109070000	103670000	129150000
AT2G33040.1	gamma subunit of Mt ATP synthase	323.31	11	11	1713700000	1866500000	2250400000	2361000000	2094700000	2407300000	2252400000	2479600000	2547300000
AT2G33150.1	peroxisomal 3-ketoacyl-CoA thiolase 3	323.31	13	12	2168500000	1947700000	2203800000	1838800000	1746100000	1731300000	1782600000	1906700000	1920800000
AT2G33210.2;AT2G33210.1	heat shock protein 60-2 ; heat shock protein 60-2	171.73	21;21	10;10	480120000	501230000	548620000	596540000	622240000	622340000	550290000	548150000	559870000
AT2G33220.1;AT1G04630.1	GRIM-19 protein ; GRIM-19 protein	5.3696	2;1	2;1	0	0	0	0	139230000	0	0	0	112060000
AT2G33255.1	Haloacid dehalogenase-like hydrolase (HAD) superfamily protein	4.9998	3	3	0	0	0	35807000	0	0	0	0	0
AT2G33340.3;AT2G33340.2;AT2G33340.1	MOS4-associated complex 3B ; MOS4-associated complex 3B ; MOS4-associated complex 3B	113.89	5;5;5	5;5;5	76759000	68091000	146400000	117520000	0	64685000	62520000	108760000	120040000
AT2G33410.1	RNA-binding (RRM/RBD/RNP motifs) family protein	21.283	3	3	72331000	127370000	0	134720000	0	98860000	126020000	160750000	104750000
AT2G33470.2;AT2G33470.1	glycolipid transfer protein 1 ; glycolipid transfer protein 1	8.7253	5;5	5;5	75381000	108400000	127640000	152690000	133850000	134130000	160530000	144230000	113160000
AT2G33590.1	NAD(P)-binding Rossmann-fold superfamily protein	13.624	3	2	72044000	61106000	41209000	46617000	44328000	72812000	57573000	56347000	78721000
AT2G33600.1	NAD(P)-binding Rossmann-fold superfamily protein	11.308	3	2	0	0	0	0	0	0	0	0	80763000
AT2G33630.1	NAD(P)-binding Rossmann-fold superfamily protein	2.0749	2	2	0	0	0	0	0	0	49519000	0	0
AT2G33730.1	P-loop containing nucleoside triphosphate hydrolases superfamily protein	6.9243	3	3	0	57165000	57331000	49832000	0	62407000	0	65059000	0
AT2G33790.1	arabinogalactan protein 30	12.499	3	3	40884000	76380000	39897000	52697000	105420000	67373000	56746000	69689000	65759000
AT2G33830.1;AT2G33830.2	Dormancy/auxin associated family protein ; Dormancy/auxin associated family protein	1.3785	1;1	1;1	0	0	0	0	0	0	0	0	4543800
AT2G33840.1;AT1G28350.1	Tyrosyl-tRNA synthetase, class Ib, bacterial/mitochondrial ; Nucleotidylyl transferase superfamily protein	45.276	4;2	4;2	34428000	48773000	49128000	38027000	40955000	58448000	49351000	41857000	29652000
AT2G33845.1	Nucleic acid-binding, OB-fold-like protein	2.7602	2	2	16530000	0	10975000	0	24275000	22554000	26332000	0	0
AT2G34040.1;AT2G34040.2	Apoptosis inhibitory protein 5 (API5) ; Apoptosis inhibitory protein 5 (API5)	138.53	8;6	8;6	229460000	276900000	323610000	307950000	248170000	305210000	286430000	284370000	286240000
AT2G34470.1;AT2G34470.2	urease accessory protein G ; urease accessory protein G	15.051	5;5	5;5	125020000	147380000	155650000	122620000	116150000	134680000	159910000	156530000	122260000
AT2G34480.1;AT1G29965.1;AT1G29970.2	Ribosomal protein L18ae/LX family protein ; Ribosomal protein L18ae/LX family protein ; 60S ribosomal protein L18A-1	53.266	6;4;4	4;2;2	482620000	457330000	561350000	630720000	668640000	537020000	473860000	474610000	421900000
AT2G34560.1;AT2G34560.2	P-loop containing nucleoside triphosphate hydrolases superfamily protein ; P-loop containing nucleoside triphosphate hydrolases superfamily protein	28.175	5;5	5;5	112960000	128390000	112340000	116360000	86724000	113400000	135420000	86296000	116820000
AT2G34590.1	Transketolase family protein	2.798	4	1	0	0	0	0	0	0	0	0	27012000
AT2G34630.1;AT2G34630.2	geranyl diphosphate synthase 1 ; geranyl diphosphate synthase 1	14.462	3;3	3;3	0	12802000	21863000	19248000	19123000	27352000	0	15929000	0
AT2G34660.2;AT2G34660.1	multidrug resistance-associated protein 2 ; multidrug resistance-associated protein 2	9.2916	5;5	3;3	0	32371000	0	22945000	37799000	0	0	0	0
AT2G34690.1	Glycolipid transfer protein (GLTP) family protein	2.8684	1	1	0	0	0	0	10556000	0	0	0	0
AT2G34790.1;AT1G30760.1	FAD-binding Berberine family protein ; FAD-binding Berberine family protein	2.7765	2;1	2;1	0	0	0	0	0	0	0	0	34258000
AT2G34970.1	Trimeric LpxA-like enzyme	5.2009	2	2	0	15498000	0	0	16439000	0	13640000	14593000	0
AT2G35010.2;AT2G35010.1	thioredoxin O1 ; thioredoxin O1	17.679	3;3	3;3	0	91472000	0	88263000	74432000	0	101390000	100650000	82186000
AT2G35020.1	N-acetylglucosamine-1-phosphate uridylyltransferase 2	5.881	6	2	0	0	42691000	0	0	0	0	0	0
AT2G35040.2;AT2G35040.1	AICARFT/IMPCHase bienzyme family protein ; AICARFT/IMPCHase bienzyme family protein	91.571	11;11	11;11	273490000	237910000	336440000	346870000	301740000	313770000	385710000	354200000	309440000
AT2G35120.1	Single hybrid motif superfamily protein	201.01	4	4	1529900000	1232800000	1597300000	1402700000	1426300000	1202400000	1296700000	1359500000	1056100000
AT2G35240.1	plastid developmental protein DAG, putative	4.0561	1	1	0	0	0	0	0	0	0	0	5962900
AT2G35490.1	Plastid-lipid associated protein PAP / fibrillin family protein	4.2033	1	1	0	0	0	0	0	0	0	0	13243000
AT2G35540.1	DNAJ heat shock N-terminal domain-containing protein	1.159	1	1	0	0	0	0	150190000	0	0	0	0
AT2G35605.1	SWIB/MDM2 domain superfamily protein	27.92	2	2	89289000	72303000	100010000	0	92450000	79681000	110050000	113410000	81467000
AT2G35630.1	ARM repeat superfamily protein	11.014	4	4	0	0	25034000	12453000	14524000	0	0	13185000	0
AT2G35690.1	acyl-CoA oxidase 5	18.313	5	2	0	0	0	0	0	0	9573400	0	0
AT2G35770.1	serine carboxypeptidase-like 28	5.5055	5	5	0	0	40678000	40195000	39869000	0	0	0	0
AT2G35780.1	serine carboxypeptidase-like 26	7.4265	3	3	0	0	120470000	101920000	94310000	110070000	0	110470000	109970000
AT2G35810.1	unknown protein; BEST Arabidopsis thaliana protein match is: unknown protein (TAIR:AT2G35830.2); Has 153 Blast hits to 153 proteins in 52 species: Archae - 0; Bacteria - 62; Metazoa - 0; Fungi - 0; Plants - 82; Viruses - 0; Other Eukaryotes - 9 (source: N	48.014	5;2;2	5;2;2	89257000	0	82420000	65414000	56577000	91376000	69773000	114200000	75489000
AT2G35840.3;AT2G35840.2;AT2G35840.1	Sucrose-6F-phosphate phosphohydrolase family protein ; Sucrose-6F-phosphate phosphohydrolase family protein ; Sucrose-6F-phosphate phosphohydrolase family protein	11.115	7;7;7	4;4;4	74739000	99502000	95678000	105530000	97712000	112070000	71283000	101090000	76503000
AT2G35880.1	TPX2 (targeting protein for Xklp2) protein family	1.436	1	1	0	0	0	0	0	0	0	0	3531100
AT2G35980.1	Late embryogenesis abundant (LEA) hydroxyproline-rich glycoprotein family	1.5336	2	2	0	0	0	0	0	0	0	0	21284000
AT2G36060.2	MMS ZWEI homologue 3	10.185	5	0	0	0	0	0	0	0	0	51764000	0
AT2G36070.1	translocase inner membrane subunit 44-2	5.6434	4	4	0	45783000	32548000	0	34285000	54463000	0	43310000	41400000
AT2G36100.1	Uncharacterised protein family (UPF0497)	1.7292	1	1	0	0	0	0	0	0	0	17608000	0
AT2G36130.1	Cyclophilin-like peptidyl-prolyl cis-trans isomerase family protein	3.8399	2	2	0	0	0	0	0	0	0	0	35775000
AT2G36290.1	alpha/beta-Hydrolases superfamily protein	46.288	4;1	4;1	95722000	66476000	83827000	76531000	91979000	85448000	75533000	65081000	51229000
AT2G36310.1	uridine-ribohydrolase 1	93.661	3	3	107580000	160290000	262900000	154860000	192770000	209220000	158130000	178970000	134580000
AT2G36380.1	pleiotropic drug resistance 6	55.885	11;4	11;4	183040000	198470000	146670000	183220000	156190000	210870000	146510000	185370000	151890000
AT2G36460.1;AT2G36460.2	Aldolase superfamily protein ; Aldolase superfamily protein	91.965	19;14	9;6	318750000	292500000	173780000	255440000	237190000	280380000	359120000	326320000	346640000
AT2G36530.1	Enolase	323.31	24	24	11186000000	10004000000	10230000000	9837800000	9858100000	9698800000	8781100000	10427000000	10953000000
AT2G36580.1	Pyruvate kinase family protein	323.31	19	8	1933400000	1826300000	2067600000	2000000000	1849300000	2069100000	1767600000	1829400000	1574200000
AT2G36620.1	ribosomal protein L24	2.3392	5	2	59660000	61258000	117160000	89386000	104040000	81073000	94951000	70926000	77734000
AT2G36830.1	gamma tonoplast intrinsic protein	7.7739	2	2	455310000	398390000	214940000	282990000	312030000	313760000	314980000	285310000	436320000
AT2G36850.1	glucan synthase-like 8	2.868	1	1	0	0	0	0	0	0	0	0	6217100
AT2G36880.2;AT2G36880.1	methionine adenosyltransferase 3 ; methionine adenosyltransferase 3	323.31	20;20	13;13	6771000000	6509000000	7488800000	6732400000	6544400000	6158800000	6462400000	5689700000	6889900000
AT2G37020.1;AT2G37020.2	Translin family protein ; Translin family protein	5.8062	4;4	4;4	0	35354000	37631000	35986000	42777000	35458000	40178000	42220000	55012000
AT2G37040.1	PHE ammonia lyase 1	310.12	19	12	1189300000	1042200000	1097900000	1027800000	1252000000	1242800000	1165900000	1151600000	1343300000
AT2G37130.2;AT2G37130.1	Peroxidase superfamily protein ; Peroxidase superfamily protein	132.73	9;9	9;9	1361700000	1376300000	781820000	1488800000	1208200000	1264900000	1376200000	1411600000	1622200000
AT2G37170.1	plasma membrane intrinsic protein 2	10.111	3	2	50933000	0	31075000	36163000	0	28879000	41203000	26026000	43995000
AT2G37220.1	RNA-binding (RRM/RBD/RNP motifs) family protein	55.736	3	3	0	64513000	58978000	61812000	64060000	68157000	53761000	70510000	66952000
AT2G37250.1	adenosine kinase	3.7506	1	1	0	0	0	0	0	0	0	0	24376000
AT2G37270.2;AT2G37270.1	ribosomal protein 5B ; ribosomal protein 5B	121.11	8;8	3;3	1169300000	1204700000	1256000000	1139400000	1234400000	1134000000	1076900000	1217300000	1089400000
AT2G37400.1	Tetratricopeptide repeat (TPR)-like superfamily protein	3.1628	1	1	0	0	0	0	0	0	0	0	6809000
AT2G37410.2;AT2G37410.1	translocase inner membrane subunit 17-2 ; translocase inner membrane subunit 17-2	12.252	1;1	1;1	0	0	0	0	0	0	0	0	22297000
AT2G37500.2;AT2G37500.1	arginine biosynthesis protein ArgJ family ; arginine biosynthesis protein ArgJ family	26.856	5;5	5;5	61812000	88949000	109170000	94622000	101920000	109930000	80876000	95954000	97721000
AT2G37690.1	phosphoribosylaminoimidazole carboxylase, putative / AIR carboxylase, putative	18.749	3	3	70079000	81776000	89262000	69281000	0	70105000	70448000	84581000	76226000
AT2G37760.4;AT2G37760.3;AT2G37760.5;AT2G37760.2;AT2G37760.1	NAD(P)-linked oxidoreductase superfamily protein ; NAD(P)-linked oxidoreductase superfamily protein ; NAD(P)-linked oxidoreductase superfamily protein ; NAD(P)-linked oxidoreductase superfamily protein ; NAD(P)-linked oxidoreductase superfamily protein	32.887	7;7;7;7;7	6;6;6;6;6	140220000	111350000	123120000	127420000	112120000	124960000	118650000	117040000	84789000
AT2G37790.1	NAD(P)-linked oxidoreductase superfamily protein	10.36	4	3	72043000	62569000	0	72296000	48673000	68905000	64790000	0	0
AT2G37970.1	SOUL heme-binding family protein	31.868	4	4	0	81281000	0	0	0	0	0	149480000	0
AT2G38020.2;AT2G38020.1	vacuoleless1 (VCL1) ; vacuoleless1 (VCL1)	1.8036	2;2	2;2	0	0	0	0	0	0	0	25925000	0
AT2G38040.2;AT2G38040.1	acetyl Co-enzyme a carboxylase carboxyltransferase alpha subunit ; acetyl Co-enzyme a carboxylase carboxyltransferase alpha subunit	98.555	14;14	14;14	377680000	485880000	358200000	408830000	478210000	428590000	446620000	437750000	539340000
AT2G38270.1	CAX-interacting protein 2	1.4246	1	1	0	0	0	0	0	0	0	0	14773000
AT2G38380.1	Peroxidase superfamily protein	189.9	12	8	2135400000	2106600000	1904800000	2171800000	2237500000	1683800000	2112500000	2599900000	2682100000
AT2G38390.1	Peroxidase superfamily protein	272.72	9	5	1731000000	1637600000	2038400000	1592400000	1739500000	1782500000	1329900000	1762800000	1262300000
AT2G38410.1	ENTH/VHS/GAT family protein	22.315	6	6	28538000	30718000	62472000	60196000	27221000	31983000	54232000	58653000	34527000
AT2G38550.1	Transmembrane proteins 14C	23.816	4	4	57552000	60786000	0	63968000	69270000	0	0	51150000	69003000
AT2G38670.1	phosphorylethanolamine cytidylyltransferase 1	16.304	3	3	0	43996000	47095000	43567000	55001000	55020000	26869000	32712000	0
AT2G38700.1	mevalonate diphosphate decarboxylase 1	204.46	15	11	970030000	1020200000	958830000	1067600000	941540000	912570000	925490000	986290000	1026800000
AT2G38710.2;AT2G38710.1	AMMECR1 family ; AMMECR1 family	5.1809	2;2	2;2	0	0	0	0	0	0	0	96963000	0
AT2G38730.1	Cyclophilin-like peptidyl-prolyl cis-trans isomerase family protein	3.6016	2	2	0	0	0	0	0	0	55023000	0	0
AT2G38740.1	Haloacid dehalogenase-like hydrolase (HAD) superfamily protein	15.299	4	4	90622000	128340000	121640000	126820000	144690000	151720000	140430000	132530000	120980000
AT2G38750.1	annexin 4	130.78	13	13	651760000	661670000	569900000	646300000	570850000	539350000	590340000	615020000	915790000
AT2G38760.1	annexin 3	100.01	9	9	340290000	320980000	374780000	281080000	257530000	265070000	256660000	285420000	268780000
AT2G38770.1	P-loop containing nucleoside triphosphate hydrolases superfamily protein	8.4112	5	5	0	33224000	37376000	28442000	36510000	39203000	40272000	37840000	31381000
AT3G54560.1;AT2G38810.3;AT2G38810.2;AT2G38810.1	histone H2A 11 ; histone H2A 8 ; histone H2A 8 ; histone H2A 8	4.6815	4;4;4;4	1;1;1;1	0	0	0	0	0	0	0	0	2129900
AT2G38860.1;AT2G38860.2;AT2G38860.3	Class I glutamine amidotransferase-like superfamily protein ; Class I glutamine amidotransferase-like superfamily protein ; Class I glutamine amidotransferase-like superfamily protein	5.8398	3;3;2;1	3;3;2;1	106740000	122960000	133310000	122670000	117890000	157340000	152620000	153600000	130410000
AT2G38940.1	phosphate transporter 1;4	11.866	1	1	0	0	0	0	0	0	0	0	25680000
AT2G39020.1	Acyl-CoA N-acyltransferases (NAT) superfamily protein	18.351	5	5	61887000	77719000	119150000	69400000	56741000	80780000	76569000	68024000	62591000
AT2G39040.1	Peroxidase superfamily protein	19.813	4	4	0	74914000	52457000	50450000	0	64689000	0	44643000	48755000
AT2G39050.1	hydroxyproline-rich glycoprotein family protein	26.59	8	8	146820000	140300000	73979000	105980000	86305000	100400000	115640000	80959000	132610000
AT2G39080.1	NAD(P)-binding Rossmann-fold superfamily protein	2.1932	1	1	0	0	0	0	0	0	0	0	21491000
AT2G39130.1	Transmembrane amino acid transporter family protein	8.829	1	1	0	0	0	0	0	0	0	0	23192000
AT2G39270.1	P-loop containing nucleoside triphosphate hydrolases superfamily protein	1.909	1	1	0	0	0	0	0	0	0	0	1615800
AT2G39310.3;AT2G39310.1;AT2G39310.2	jacalin-related lectin 22 ; jacalin-related lectin 22 ; jacalin-related lectin 22	323.31	24;24;22;1	24;24;22;1	9694900000	8528600000	7549400000	6813000000	8221600000	8190500000	7858800000	8992100000	9725200000
AT3G55280.3;AT3G55280.2;AT3G55280.1;AT2G39460.2;AT2G39460.1	ribosomal protein L23AB ; ribosomal protein L23AB ; ribosomal protein L23AB ; ribosomal protein L23AA ; ribosomal protein L23AA	19.103	7;7;7;7;7	7;7;7;7;7	269460000	274880000	222550000	216410000	361730000	199920000	295930000	162190000	247520000
AT2G39630.2;AT2G39630.1	Nucleotide-diphospho-sugar transferases superfamily protein ; Nucleotide-diphospho-sugar transferases superfamily protein	2.6771	1;1	1;1	0	0	0	0	0	0	0	2824900	0
AT2G39730.3;AT2G39730.2;AT2G39730.1	rubisco activase ; rubisco activase ; rubisco activase	12.856	3;3;3	3;3;3	0	16641000	27974000	0	0	19530000	18380000	25406000	13788000
AT2G39770.2;AT2G39770.1	Glucose-1-phosphate adenylyltransferase family protein ; Glucose-1-phosphate adenylyltransferase family protein	109.73	9;9;1	9;9;1	229290000	226960000	227870000	166660000	226740000	281200000	200810000	233200000	192020000
AT2G39780.1;AT2G39780.2	ribonuclease 2 ; ribonuclease 2	48.793	3;2	3;2	64713000	127100000	133600000	56390000	82392000	137720000	51402000	74106000	51396000
AT2G39800.2;AT2G39800.3;AT2G39800.4;AT2G39800.1	delta1-pyrroline-5-carboxylate synthase 1 ; delta1-pyrroline-5-carboxylate synthase 1 ; delta1-pyrroline-5-carboxylate synthase 1 ; delta1-pyrroline-5-carboxylate synthase 1	36.068	9;9;9;9	6;6;6;6	152620000	167680000	166480000	170150000	125490000	140130000	102620000	122320000	109340000
AT2G39940.1	RNI-like superfamily protein	5.8083	3	3	19140000	22416000	31072000	20749000	25059000	26088000	20823000	21312000	17321000
AT2G39970.1	Mitochondrial substrate carrier family protein	2.7266	1	1	0	0	0	0	9666500	0	0	0	0
AT2G39990.1	eukaryotic translation initiation factor 2	227.65	10	10	571830000	716350000	905430000	800560000	626670000	679710000	800030000	842590000	725190000
AT2G40060.1	Clathrin light chain protein	2.1523	2	2	0	0	0	0	0	0	0	0	6444800
AT2G40290.1;AT2G40290.3;AT2G40290.2	Eukaryotic translation initiation factor 2 subunit 1 ; Eukaryotic translation initiation factor 2 subunit 1 ; Eukaryotic translation initiation factor 2 subunit 1	14.123	4;2;2	4;2;2	84596000	63384000	55614000	58768000	95261000	46870000	54900000	68670000	98005000
AT2G40490.1	Uroporphyrinogen decarboxylase	3.9199	1	1	0	0	0	0	0	18830000	0	0	0
AT2G40600.1	appr-1-p processing enzyme family protein	28.9	2	2	27431000	56417000	81601000	71119000	53776000	55834000	58469000	48772000	29800000
AT2G40660.1	Nucleic acid-binding, OB-fold-like protein	35.112	11	11	238080000	266240000	267200000	282300000	303620000	244350000	253640000	257680000	241610000
AT2G40730.1	Protein kinase family protein with ARM repeat domain	11.26	7	7	66326000	71685000	110740000	51868000	75762000	69962000	49783000	52244000	39965000
AT2G40800.1	unknown protein; BEST Arabidopsis thaliana protein match is: unknown protein (TAIR:AT3G56430.1); Has 43 Blast hits to 43 proteins in 15 species: Archae - 0; Bacteria - 0; Metazoa - 0; Fungi - 0; Plants - 41; Viruses - 0; Other Eukaryotes - 2 (source: NCBI	1.9789	1	1	0	0	0	0	0	10225000	0	0	0
AT2G40840.1	disproportionating enzyme 2	38.682	9	9	215830000	205390000	264230000	227020000	218190000	232690000	221770000	275820000	211800000
AT2G40890.1	cytochrome P450, family 98, subfamily A, polypeptide 3	12.115	6	6	124370000	134640000	142950000	158450000	131130000	168840000	132660000	101810000	139980000
AT2G40950.1	Basic-leucine zipper (bZIP) transcription factor family protein	1.4738	1	1	0	0	0	0	0	0	0	0	1282500
AT2G41220.1	glutamate synthase 2	205.72	27;2;2	27;2;2	985980000	748230000	851240000	817140000	825550000	854070000	829580000	916890000	786170000
AT2G41380.1	S-adenosyl-L-methionine-dependent methyltransferases superfamily protein	55.978	9	9	303990000	357010000	326620000	407650000	309000000	313830000	283020000	359530000	388510000
AT2G41475.1	Embryo-specific protein 3, (ATS3)	1.4908	1	1	0	0	0	0	0	0	0	0	38248000
AT2G41530.1	S-formylglutathione hydrolase	154.82	7	7	384620000	346380000	341280000	339740000	339960000	390660000	335950000	338620000	391420000
AT2G41560.1	autoinhibited Ca(2+)-ATPase, isoform 4	14.89	2	2	0	13132000	8283800	9870600	12440000	15644000	0	7424700	0
AT2G41600.4;AT2G41600.1;AT2G41600.2;AT2G41600.3;AT2G41600.5	Mitochondrial glycoprotein family protein ; Mitochondrial glycoprotein family protein ; Mitochondrial glycoprotein family protein ; Mitochondrial glycoprotein family protein ; Mitochondrial glycoprotein family protein	4.5642	1;1;1;1;1	1;1;1;1;1	0	0	27181000	17693000	29603000	25722000	29555000	29319000	26324000
AT2G41620.1	Nucleoporin interacting component (Nup93/Nic96-like) family protein	1.9514	2	2	0	0	0	0	0	0	0	0	20740000
AT3G10330.1;AT2G41630.1	Cyclin-like family protein ; transcription factor IIB	1.1085	1;1	1;1	0	0	0	0	0	0	0	0	9291900
AT2G41740.1	villin 2	128.53	24	20	923030000	955860000	1064500000	906220000	928620000	978350000	986400000	972770000	1011000000
AT2G41790.1	Insulinase (Peptidase family M16) family protein	22.139	14	14	172560000	224830000	217410000	227820000	179300000	220350000	236010000	210630000	317640000
AT2G41800.1	Protein of unknown function, DUF642	35.044	9	9	304090000	304810000	265610000	276140000	223950000	241770000	239170000	317890000	236290000
AT2G41840.1	Ribosomal protein S5 family protein	109.91	7	3	1318100000	1100400000	978480000	1114900000	1257600000	1015900000	1055300000	1110000000	1164900000
AT2G42210.4;AT2G42210.3;AT2G42210.1;AT2G42210.2	Mitochondrial import inner membrane translocase subunit Tim17/Tim22/Tim23 family protein ; Mitochondrial import inner membrane translocase subunit Tim17/Tim22/Tim23 family protein ; Mitochondrial import inner membrane translocase subunit Tim17/Tim22/Tim23	6.8245	3;3;3;3	3;3;3;3	49243000	35345000	25813000	40236000	51915000	43674000	40395000	28431000	42928000
AT2G42490.1	Copper amine oxidase family protein	29.016	6	6	193190000	126120000	177520000	174380000	148490000	134710000	132710000	158800000	131100000
AT2G42520.1	P-loop containing nucleoside triphosphate hydrolases superfamily protein	11.702	7	2	0	0	72876000	73284000	71561000	65569000	80355000	69412000	66208000
AT2G42590.1;AT2G42590.3;AT2G42590.2	general regulatory factor 9 ; general regulatory factor 9 ; general regulatory factor 9	39.045	6;6;4	5;5;3	186410000	169740000	182450000	176950000	138480000	218990000	197560000	139380000	190820000
AT2G42600.2;AT2G42600.1	phosphoenolpyruvate carboxylase 2 ; phosphoenolpyruvate carboxylase 2	7.0732	25;25	3;3	0	0	13042000	15640000	9202700	0	11864000	0	0
AT2G42680.1	multiprotein bridging factor 1A	8.759	4	3	94182000	0	52599000	0	0	56556000	0	0	78535000
AT2G42700.1;AT2G42700.2	FUNCTIONS IN: molecular_function unknown; INVOLVED IN: vesicle-mediated transport, vesicle docking involved in exocytosis; LOCATED IN: cellular_component unknown; EXPRESSED IN: 22 plant structures; EXPRESSED DURING: 14 growth stages; CONTAINS InterPro DOM	1.1717	1;1	1;1	0	0	0	0	0	0	0	0	0
AT2G42710.1	Ribosomal protein L1p/L10e family	10.516	2	2	45943000	31999000	63887000	59645000	54885000	35784000	0	47804000	53754000
AT5G45775.1;AT5G45775.2;AT4G18730.1;AT3G58700.1;AT2G42740.1	Ribosomal L5P family protein ; Ribosomal L5P family protein ; ribosomal protein L16B ; Ribosomal L5P family protein ; ribosomal protein large subunit 16A	83.243	9;9;9;9;9	9;9;9;9;9	2146400000	2030900000	2026100000	2576400000	2668900000	2249000000	2718400000	2545400000	2698500000
AT2G42790.1	citrate synthase 3	103.49	12	7	346890000	331200000	412330000	370610000	414470000	369870000	428120000	337270000	380980000
AT2G42810.1;AT2G42810.2	protein phosphatase 5.2 ; protein phosphatase 5.2	27.638	11;10	11;10	258840000	232790000	249010000	240120000	211620000	219400000	208190000	259950000	178510000
AT2G42910.1	Phosphoribosyltransferase family protein	43.129	9	9	110430000	275380000	287880000	221730000	272140000	243160000	190210000	251560000	177170000
AT2G43090.1;AT2G43090.2	Aconitase/3-isopropylmalate dehydratase protein ; Aconitase/3-isopropylmalate dehydratase protein	117.67	8;6	6;6	598790000	501730000	539090000	499730000	576090000	568640000	526470000	517530000	532870000
AT2G43120.1	RmlC-like cupins superfamily protein	5.7886	1	1	0	45731000	0	0	0	0	0	44955000	72483000
AT2G43160.3;AT2G43160.2;AT2G43160.1;AT2G43160.4	ENTH/VHS family protein ; ENTH/VHS family protein ; ENTH/VHS family protein ; ENTH/VHS family protein	5.7959	3;3;3;2;1	3;3;3;2;1	98280000	0	0	0	0	0	66159000	75288000	69111000
AT2G43360.1	Radical SAM superfamily protein	5.2639	2	2	0	0	0	0	37206000	0	0	20997000	21586000
AT3G59540.1;AT2G43460.1	Ribosomal L38e protein family ; Ribosomal L38e protein family	5.5375	2;2	2;2	207300000	0	350150000	370100000	441440000	436190000	340080000	423200000	312690000
AT2G43480.1	Peroxidase superfamily protein	2.9279	3	3	0	0	0	0	0	0	0	0	26770000
AT2G43535.1	Scorpion toxin-like knottin superfamily protein	2.9834	1	1	0	0	0	0	0	0	0	0	107020000
AT2G43590.1	Chitinase family protein	3.437	2	2	0	0	16704000	15855000	0	0	18888000	0	0
AT2G43610.1	Chitinase family protein	63.953	8;2	8;2	483710000	640410000	307810000	366670000	393750000	458630000	387040000	321940000	635510000
AT2G43710.2;AT2G43710.1	Plant stearoyl-acyl-carrier-protein desaturase family protein ; Plant stearoyl-acyl-carrier-protein desaturase family protein	16.766	7;7;2;1;1	4;4;0;0;0	74640000	72393000	74156000	56432000	64497000	39567000	68754000	61368000	85355000
AT2G43750.2;AT2G43750.1	O-acetylserine (thiol) lyase B ; O-acetylserine (thiol) lyase B	83.122	12;12	11;11	562440000	486610000	513170000	507430000	520640000	467930000	539590000	541700000	544360000
AT2G43770.1	Transducin/WD40 repeat-like superfamily protein	3.8869	3	3	37842000	0	42323000	36527000	0	34139000	0	34601000	28027000
AT2G43790.1	MAP kinase 6	32.463	4	3	214160000	204830000	236120000	197890000	197020000	201830000	209840000	210840000	168070000
AT2G43820.1	UDP-glucosyltransferase 74F2	46.438	5;1;1	5;1;1	75811000	0	94508000	0	106420000	105180000	0	121260000	0
AT2G43910.1;AT2G43910.2;AT2G43910.3	HARMLESS TO OZONE LAYER 1 ; HARMLESS TO OZONE LAYER 1 ; HARMLESS TO OZONE LAYER 1	95.055	9;8;5;1;1;1	9;8;5;1;1;1	1527600000	1401000000	1814000000	1166300000	1394100000	966610000	1693300000	1705000000	1561900000
AT2G43940.1	S-adenosyl-L-methionine-dependent methyltransferases superfamily protein	36.19	5	5	116930000	123730000	109140000	127350000	110690000	123890000	110130000	127180000	113550000
AT2G43950.3;AT2G43950.2;AT2G43950.1	chloroplast outer envelope protein 37 ; chloroplast outer envelope protein 37 ; chloroplast outer envelope protein 37	10.998	1;1;1	1;1;1	0	0	0	0	0	0	0	0	16349000
AT2G43980.1	inositol 1,3,4-trisphosphate 5/6-kinase 4	3.43	1	1	0	0	0	0	0	0	0	4013700	0
AT2G44050.1	6,7-dimethyl-8-ribityllumazine synthase / DMRL synthase / lumazine synthase / riboflavin synthase	3.5882	2	2	0	25721000	22617000	25145000	28660000	17802000	21470000	0	22313000
AT2G44060.2;AT2G44060.1	Late embryogenesis abundant protein, group 2 ; Late embryogenesis abundant protein, group 2	122.4	16;16	16;16	2044300000	2059900000	2269500000	1769500000	1813200000	1941000000	1784300000	1909000000	1694400000
AT2G44100.2;AT2G44100.1	guanosine nucleotide diphosphate dissociation inhibitor 1 ; guanosine nucleotide diphosphate dissociation inhibitor 1	170.36	13;13;4	7;7;1	458530000	240590000	290070000	293540000	346410000	271340000	362790000	326380000	457890000
AT2G44120.1;AT2G44120.2;AT3G13580.3;AT3G13580.2;AT3G13580.1	Ribosomal protein L30/L7 family protein ; Ribosomal protein L30/L7 family protein ; Ribosomal protein L30/L7 family protein ; Ribosomal protein L30/L7 family protein ; Ribosomal protein L30/L7 family protein	62.543	8;8;6;6;6	4;4;3;3;3	341270000	306640000	283500000	269560000	350000000	290190000	202840000	324330000	288950000
AT2G44160.1	methylenetetrahydrofolate reductase 2	157.56	20	16	554420000	539340000	607190000	651010000	486540000	530590000	654910000	540830000	569450000
AT2G44230.1	Plant protein of unknown function (DUF946)	1.4367	1	1	0	0	0	0	0	0	0	6049300	0
AT2G44310.1	Calcium-binding EF-hand family protein	60.314	3	3	44138000	45271000	70065000	61527000	56738000	51391000	56868000	60806000	31067000
AT2G44350.1;AT2G44350.2	Citrate synthase family protein ; Citrate synthase family protein	323.31	20;20;3	20;20;3	2458700000	2137100000	2409200000	2148900000	2216900000	2274800000	2265400000	2403100000	2121000000
AT2G44450.1	beta glucosidase 15	27.53	4;1;1;1	4;1;1;1	49932000	42141000	35584000	46159000	37758000	42809000	46356000	33106000	39948000
AT2G44490.1	Glycosyl hydrolase superfamily protein	4.0624	2	2	45684000	0	0	0	0	54868000	0	54509000	57914000
AT2G44525.1	Protein of unknown function (DUF498/DUF598)	2.8459	1	1	0	0	0	0	0	0	0	0	13472000
AT2G44530.2;AT2G44530.1	Phosphoribosyltransferase family protein ; Phosphoribosyltransferase family protein	10.207	4;4	4;4	0	29652000	26931000	0	31043000	22706000	18698000	22597000	19076000
AT2G44610.1	Ras-related small GTP-binding family protein	19.903	5;2;2;2;1	5;2;2;2;1	210080000	216040000	229740000	220840000	228550000	210660000	265010000	229080000	218660000
AT2G44620.1	mitochondrial acyl carrier protein 1	7.1318	1	1	0	0	0	0	0	0	0	0	15392000
AT2G44650.1	chloroplast chaperonin 10	31.428	1	1	67263000	62966000	88341000	69983000	55278000	66222000	63550000	68351000	58438000
AT2G44710.1	RNA-binding (RRM/RBD/RNP motifs) family protein	13.908	3	3	0	0	0	19526000	13559000	0	18302000	24407000	18910000
AT2G44790.1	uclacyanin 2	49.523	5	5	518450000	669870000	546160000	766860000	588780000	332780000	715680000	524260000	507390000
AT2G45060.1	Uncharacterised conserved protein UCP022280	4.8519	1	1	0	0	0	0	0	0	0	0	10858000
AT2G45140.1	plant VAP homolog 12	14.02	4	4	45502000	63165000	47762000	0	54821000	0	0	53446000	44429000
AT2G45200.1	golgi snare 12	5.2211	1	1	0	0	0	0	0	0	0	0	11663000
AT2G45220.1	Plant invertase/pectin methylesterase inhibitor superfamily	172.45	8	8	356430000	372050000	204740000	309090000	304520000	309020000	266950000	296350000	380800000
AT2G45240.1	methionine aminopeptidase 1A	6.7254	1	1	0	0	0	0	0	0	0	0	34721000
AT4G36100.1;AT4G34080.1;AT4G33320.1;AT2G45260.1	Sec1/munc18-like (SM) proteins superfamily ; Plant protein of unknown function (DUF641) ; Plant protein of unknown function (DUF641) ; Plant protein of unknown function (DUF641)	1.628	1;1;1;1	1;1;1;1	0	0	0	0	0	0	0	6372900	0
AT2G45290.1	Transketolase	36.21	14	8	333960000	182530000	400400000	316720000	207410000	277090000	254290000	290990000	287220000
AT2G45300.1	RNA 3-terminal phosphate cyclase/enolpyruvate transferase, alpha/beta	108.82	14	5	903570000	851300000	903670000	793260000	637330000	757970000	889850000	818350000	742450000
AT2G45330.2;AT2G45330.1;AT5G23600.1	RNA 2-phosphotransferase, Tpt1 / KptA family ; RNA 2-phosphotransferase, Tpt1 / KptA family ; RNA 2-phosphotransferase, Tpt1 / KptA family	18.956	3;3;2	3;3;2	39654000	39883000	19724000	17166000	23016000	0	39684000	43835000	38890000
AT2G45470.1	FASCICLIN-like arabinogalactan protein 8	217.33	7	6	1082200000	1281400000	1706200000	1410400000	1320400000	1122900000	1377500000	1154900000	1006100000
AT2G45540.1;AT2G45540.2	WD-40 repeat family protein / beige-related ; WD-40 repeat family protein / beige-related	2.6955	2;2	2;2	0	18667000	13017000	19004000	0	0	18896000	0	15375000
AT2G45640.2;AT2G45640.1	SIN3 associated polypeptide P18 ; SIN3 associated polypeptide P18	1.5217	1;1	1;1	0	0	0	0	0	0	0	0	9405200
AT2G45710.1;AT3G61110.1	Zinc-binding ribosomal protein family protein ; ribosomal protein S27	6.5781	3;3;1	2;2;1	0	0	0	0	0	0	0	0	34975000
AT2G45730.1	eukaryotic initiation factor 3 gamma subunit family protein	1.5174	1	1	0	0	0	0	0	0	0	0	12395000
AT2G45790.1	phosphomannomutase	62.312	9	9	534990000	465850000	543570000	462780000	431660000	502980000	431670000	496120000	479720000
AT2G45810.1	DEA(D/H)-box RNA helicase family protein	82.204	9	4	124870000	121830000	153590000	139620000	133590000	149440000	134090000	121100000	133880000
AT2G45820.1	Remorin family protein	7.8749	5	5	71893000	93248000	71809000	81409000	0	79650000	98871000	73905000	82026000
AT2G45960.2;AT2G45960.1;AT2G45960.3	plasma membrane intrinsic protein 1B ; plasma membrane intrinsic protein 1B ; plasma membrane intrinsic protein 1B	51.686	4;4;4	3;3;3	270310000	390840000	191740000	271720000	285040000	281910000	232880000	257690000	423560000
AT2G45990.3;AT2G45990.2;AT2G45990.1;AT2G45990.4	unknown protein; FUNCTIONS IN: molecular_function unknown; INVOLVED IN: biological_process unknown; LOCATED IN: chloroplast; EXPRESSED IN: 22 plant structures; EXPRESSED DURING: 13 growth stages; Has 35333 Blast hits to 34131 proteins in 2444 species: Arc	3.1188	2;2;2;1	2;2;2;1	40378000	0	0	0	0	0	0	0	27012000
AT2G46140.1	Late embryogenesis abundant protein	44.855	5	5	229120000	192630000	208910000	164340000	149280000	161200000	177100000	185180000	192910000
AT2G46280.2;AT2G46280.1	TGF-beta receptor interacting protein 1 ; TGF-beta receptor interacting protein 1	100.41	7;7;3;1	7;7;3;1	515780000	486340000	355440000	527400000	406460000	409170000	417640000	491790000	596040000
AT2G46370.2;AT2G46370.1;AT2G46370.4;AT2G46370.3	Auxin-responsive GH3 family protein ; Auxin-responsive GH3 family protein ; Auxin-responsive GH3 family protein ; Auxin-responsive GH3 family protein	45.727	6;6;6;4	6;6;6;4	0	0	58898000	63243000	0	0	53308000	48855000	46774000
AT2G46520.1	cellular apoptosis susceptibility protein, putative / importin-alpha re-exporter, putative	75.693	13	13	181740000	148490000	190960000	161490000	189490000	202280000	150820000	183830000	133400000
AT2G46560.1	transducin family protein / WD-40 repeat family protein	2.4874	1	1	0	0	0	0	0	0	0	0	8637800
AT2G46650.1	cytochrome B5 isoform C	12.17	3	3	79967000	90481000	94258000	108030000	76874000	135280000	126380000	126860000	110660000
AT2G46750.1	D-arabinono-1,4-lactone oxidase family protein	90.441	14;2;2	10;0;2	475360000	467710000	503470000	578970000	391720000	434070000	509690000	579200000	424940000
AT2G46760.1	D-arabinono-1,4-lactone oxidase family protein	7.354	6	2	89078000	122000000	124970000	99229000	69343000	115170000	110710000	102410000	62949000
AT2G46860.1	pyrophosphorylase 3	21.679	2	1	88344000	84430000	84847000	56420000	86230000	100080000	66964000	62303000	37943000
AT2G47000.1	ATP binding cassette subfamily B4	101.93	17;2;1	7;1;0	430910000	365190000	308520000	387290000	383590000	347560000	296480000	344140000	378160000
AT3G62250.1;AT2G47110.2;AT2G47110.1;AT1G23410.1	ubiquitin 5 ; ubiquitin 6 ; ubiquitin 6 ; Ribosomal protein S27a / Ubiquitin family protein	26.923	6;6;6;5	2;2;2;1	359760000	251370000	251040000	328330000	336660000	348930000	330070000	386510000	450810000
AT2G47130.1	NAD(P)-binding Rossmann-fold superfamily protein	104.31	5	4	148640000	131180000	143220000	178780000	125760000	179940000	174530000	143080000	154540000
AT2G47250.1;AT3G62310.1	RNA helicase family protein ; RNA helicase family protein	5.8008	5;4	5;4	34938000	25165000	37848000	42281000	35562000	32366000	40268000	31620000	24811000
AT2G47390.1	Prolyl oligopeptidase family protein	99.223	16	16	285490000	307450000	382020000	356660000	402120000	342150000	325140000	374740000	241160000
AT2G47470.1;AT2G47470.3;AT2G47470.4;AT2G47470.2	thioredoxin family protein ; thioredoxin family protein ; thioredoxin family protein ; thioredoxin family protein	201.22	14;13;13;10	14;13;13;10	1616800000	1280900000	1531600000	1407900000	1435800000	1221700000	1366000000	1369900000	1256000000
AT2G47510.2;AT2G47510.1	fumarase 1 ; fumarase 1	323.31	15;15;6;6;6	15;15;6;6;6	1094900000	991500000	1115000000	1085500000	982550000	1207800000	1033300000	1066300000	1192000000
AT2G47540.1	Pollen Ole e 1 allergen and extensin family protein	1.2145	2	2	0	0	0	0	0	0	0	0	25611000
AT2G47610.1	Ribosomal protein L7Ae/L30e/S12e/Gadd45 family protein	43.249	7	1	667080000	1258300000	1122500000	1444100000	1400500000	1243700000	1119300000	1159400000	1219800000
AT3G62840.2;AT2G47640.3;AT2G47640.2;AT3G62840.1;AT2G47640.4;AT2G47640.1	Small nuclear ribonucleoprotein family protein ; Small nuclear ribonucleoprotein family protein ; Small nuclear ribonucleoprotein family protein ; Small nuclear ribonucleoprotein family protein ; Small nuclear ribonucleoprotein family protein ; Small nucl	7.7038	4;4;4;4;4;4	4;4;4;4;4;4	63413000	91477000	111020000	93770000	98946000	78329000	81183000	88164000	100540000
AT2G47710.1	Adenine nucleotide alpha hydrolases-like superfamily protein	9.9021	4	4	0	62281000	106600000	76749000	62019000	61625000	105200000	80459000	94587000
AT2G47730.1	glutathione S-transferase phi 8	323.31	10	9	4862400000	4909500000	5277500000	4933000000	5351200000	5558100000	5017700000	4320900000	3939700000
AT2G47800.1	multidrug resistance-associated protein 4	24.133	3	2	25340000	30229000	14649000	38741000	31618000	29566000	16193000	15661000	0
AT2G47970.2;AT2G47970.1	Nuclear pore localisation protein NPL4 ; Nuclear pore localisation protein NPL4	46.462	6;6	6;6	89590000	148500000	183460000	143470000	119480000	159140000	123550000	116350000	86945000
AT3G01050.1	membrane-anchored ubiquitin-fold protein 1 precursor	1.4075	1	1	0	0	0	0	0	0	0	0	13652000
AT3G01120.1	Pyridoxal phosphate (PLP)-dependent transferases superfamily protein	162.28	11	11	413790000	418570000	444870000	364230000	330910000	431520000	367680000	419430000	339940000
AT3G01130.2;AT3G01130.1	unknown protein; FUNCTIONS IN: molecular_function unknown; INVOLVED IN: biological_process unknown; EXPRESSED IN: male gametophyte, pollen tube; EXPRESSED DURING: M germinated pollen stage; BEST Arabidopsis thaliana protein match is: unknown protein (TAIR	8.3803	1;1	1;1	0	0	0	0	0	0	0	0	42718000
AT3G01180.1	starch synthase 2	2.6333	1	1	0	0	0	0	0	0	0	0	131130000
AT3G01190.1	Peroxidase superfamily protein	111.94	16	14	1870900000	1539200000	1614900000	1535300000	1087200000	1302000000	1490800000	1565700000	1556200000
AT3G01280.1	voltage dependent anion channel 1	323.31	12	11	3712900000	3246500000	2930500000	3912800000	4024300000	3733400000	3457700000	3489500000	3546600000
AT3G01290.1	SPFH/Band 7/PHB domain-containing membrane-associated protein family	75.933	11;3;1;1;1;1;1;1;1	11;3;1;1;1;1;1;1;1	280510000	302230000	251770000	257460000	199920000	333360000	212660000	187900000	206020000
AT5G15070.1;AT3G01310.2;AT3G01310.1;AT5G15070.2	Phosphoglycerate mutase-like family protein ; Phosphoglycerate mutase-like family protein ; Phosphoglycerate mutase-like family protein ; Phosphoglycerate mutase-like family protein	10.625	2;2;2;2	2;2;2;2	0	0	27055000	37123000	33231000	0	0	0	0
AT3G01340.2;AT3G01340.1	Transducin/WD40 repeat-like superfamily protein ; Transducin/WD40 repeat-like superfamily protein	79.34	7;7	5;5	145420000	93715000	199570000	140020000	134780000	110190000	107800000	111410000	109620000
AT3G01390.2;AT3G01390.1	vacuolar membrane ATPase 10 ; vacuolar membrane ATPase 10	111.24	3;3	3;3	528130000	188800000	314550000	278660000	365880000	211030000	301130000	562610000	286500000
AT3G01420.1	Peroxidase superfamily protein	323.31	32	32	4032000000	3157200000	3315200000	3351000000	3186200000	2981100000	2731500000	2946300000	2942900000
AT3G01520.1	Adenine nucleotide alpha hydrolases-like superfamily protein	7.4672	4;1	4;1	151540000	169440000	172690000	188100000	142900000	141130000	150220000	158400000	185990000
AT3G01640.1;AT5G14470.1	glucuronokinase G ; GHMP kinase family protein	1.9847	2;1	2;1	0	0	0	0	0	0	0	32234000	0
AT3G01670.1	unknown protein; BEST Arabidopsis thaliana protein match is: unknown protein (TAIR:AT3G01680.1); Has 121 Blast hits to 111 proteins in 12 species: Archae - 0; Bacteria - 0; Metazoa - 0; Fungi - 0; Plants - 121; Viruses - 0; Other Eukaryotes - 0 (source: N	35.608	3	3	0	35081000	73626000	40888000	43281000	51461000	56163000	38231000	42867000
AT3G01680.1	CONTAINS InterPro DOMAIN/s: Mediator complex subunit Med28 (InterPro:IPR021640); BEST Arabidopsis thaliana protein match is: unknown protein (TAIR:AT3G01670.1); Has 122 Blast hits to 112 proteins in 13 species: Archae - 0; Bacteria - 0; Metazoa - 0; Fungi	15.636	4	4	19097000	0	0	40650000	30412000	0	27643000	44755000	29050000
AT3G01780.1	ARM repeat superfamily protein	26.727	7	7	56288000	60160000	55027000	56325000	60255000	59100000	41585000	63394000	55836000
AT3G01790.2;AT3G01790.1	Ribosomal protein L13 family protein ; Ribosomal protein L13 family protein	4.5253	2;2	2;2	36640000	43959000	42431000	49194000	60770000	44356000	42268000	55417000	54933000
AT3G01850.2;AT3G01850.1	Aldolase-type TIM barrel family protein ; Aldolase-type TIM barrel family protein	5.6877	1;1	1;1	0	0	0	0	0	0	0	0	2325300
AT3G01910.1;AT3G01910.2	sulfite oxidase ; sulfite oxidase	45.367	10;5;2	10;5;2	251430000	204950000	173490000	259500000	197840000	227520000	255640000	283060000	253500000
AT3G01930.1;AT3G01930.2	Major facilitator superfamily protein ; Major facilitator superfamily protein	2.5473	1;1	1;1	0	0	0	0	0	0	0	4366300	0
AT3G02080.1	Ribosomal protein S19e family protein	55.049	5	2	216790000	118420000	226680000	150070000	174310000	172980000	133250000	165970000	136300000
AT3G02090.1;AT3G02090.2	Insulinase (Peptidase family M16) protein ; Insulinase (Peptidase family M16) protein	323.31	15;14	15;14	3364300000	2488800000	2285500000	2624400000	3017600000	2795100000	2334300000	2427800000	2535300000
AT3G02200.1;AT3G02200.2	Proteasome component (PCI) domain protein ; Proteasome component (PCI) domain protein	22.602	6;6	6;6	124930000	143160000	107290000	141040000	126320000	128660000	137160000	115230000	110160000
AT3G02230.1	reversibly glycosylated polypeptide 1	323.31	24;7;2	12;2;0	4991700000	4835100000	5657200000	4944400000	4695800000	5470100000	4933700000	4589000000	5054900000
AT3G02260.1	auxin transport protein (BIG)	12.882	9	9	0	34438000	0	0	35656000	36321000	53013000	36526000	25298000
AT3G02350.1	galacturonosyltransferase 9	4.9114	1	1	0	0	0	0	0	0	0	13733000	0
AT3G02360.2;AT3G02360.1	6-phosphogluconate dehydrogenase family protein ; 6-phosphogluconate dehydrogenase family protein	138.41	17;17	14;14	817210000	838170000	856730000	825820000	741310000	753620000	756030000	658900000	838190000
AT3G02520.1	general regulatory factor 7	126.97	12	5	355600000	290150000	254730000	312390000	252310000	297170000	354780000	385540000	383060000
AT3G02530.1	TCP-1/cpn60 chaperonin family protein	233.05	18	6	744120000	827340000	933340000	1001900000	784210000	939930000	900550000	869290000	910340000
AT3G02540.3;AT3G02540.1;AT3G02540.2	Rad23 UV excision repair protein family ; Rad23 UV excision repair protein family ; Rad23 UV excision repair protein family	31.444	3;3;2	2;2;2	128820000	128910000	78281000	96751000	111760000	95835000	92672000	145480000	118000000
AT3G02560.2;AT3G02560.1	Ribosomal protein S7e family protein ; Ribosomal protein S7e family protein	279.11	7;7	4;4	223940000	213630000	195190000	262170000	287420000	288270000	241370000	271260000	229050000
AT3G02630.1	Plant stearoyl-acyl-carrier-protein desaturase family protein	45.071	10;4	7;1	211210000	205460000	209110000	157230000	186470000	226530000	244290000	191480000	186590000
AT3G02650.1	Tetratricopeptide repeat (TPR)-like superfamily protein	3.5831	3	3	22239000	19643000	20703000	24773000	21571000	0	21435000	0	18028000
AT3G02710.1	ARM repeat superfamily protein	4.3811	3	3	14586000	17432000	18321000	17980000	14377000	24700000	23515000	20004000	15219000
AT3G02720.1	Class I glutamine amidotransferase-like superfamily protein	27.076	7	7	131540000	138160000	144430000	125140000	128200000	141460000	152650000	118890000	96802000
AT3G02740.1	Eukaryotic aspartyl protease family protein	3.278	1	1	0	0	0	0	0	0	0	0	16062000
AT3G02760.1	Class II aaRS and biotin synthetases superfamily protein	74.115	19	19	300170000	341080000	385930000	315280000	321830000	381390000	318020000	285840000	292050000
AT3G02780.1	isopentenyl pyrophosphate:dimethylallyl pyrophosphate isomerase 2	83.405	10	6	1188800000	1337000000	1501400000	1428300000	1391600000	1422100000	1415700000	1386000000	1480600000
AT3G02870.1;AT3G02870.3;AT3G02870.2	Inositol monophosphatase family protein ; Inositol monophosphatase family protein ; Inositol monophosphatase family protein	37.618	4;3;3	4;3;3	49093000	37659000	41785000	39305000	39457000	34876000	41977000	34294000	19921000
AT3G02875.1	Peptidase M20/M25/M40 family protein	2.1193	3	3	19048000	24605000	0	26109000	0	21426000	0	23077000	25305000
AT3G02880.1	Leucine-rich repeat protein kinase family protein	23.969	11	9	270450000	307900000	298030000	310580000	310000000	348210000	295470000	345730000	291380000
AT3G03060.1;AT5G16930.1	P-loop containing nucleoside triphosphate hydrolases superfamily protein ; AAA-type ATPase family protein	1.3016	2;1	2;1	0	0	0	0	0	0	10061000	0	0
AT3G03070.1	NADH-ubiquinone oxidoreductase-related	71.855	2	2	206490000	0	299550000	201220000	225210000	270520000	200450000	282010000	197990000
AT3G03100.2;AT3G03100.1	NADH:ubiquinone oxidoreductase, 17.2kDa subunit ; NADH:ubiquinone oxidoreductase, 17.2kDa subunit	13.253	2;2	2;2	207830000	164270000	139120000	194720000	155760000	169520000	182380000	183920000	224970000
AT3G03250.1	UDP-GLUCOSE PYROPHOSPHORYLASE 1	323.31	21	9	1931600000	1820700000	1720600000	1796900000	1816000000	1786300000	1792000000	1580500000	2115600000
AT3G03270.2;AT3G03270.1	Adenine nucleotide alpha hydrolases-like superfamily protein ; Adenine nucleotide alpha hydrolases-like superfamily protein	9.5362	4;3	4;3	0	69786000	100440000	84438000	115610000	80378000	69531000	96670000	97266000
AT3G03310.1	lecithin:cholesterol acyltransferase 3	1.3425	1	1	56222000	0	0	0	0	0	0	0	0
AT3G03340.1	LUC7 related protein	1.159	1	1	0	0	0	0	0	0	0	0	6221300
AT3G03380.1	DegP protease 7	8.9272	3	3	44768000	38340000	55260000	43986000	54942000	36128000	52745000	45568000	34432000
AT3G03490.1	peroxin 19-1	6.0528	1	1	0	0	0	0	0	0	0	0	3847800
AT3G03500.1	TatD related DNase	5.1653	4	4	68061000	0	0	0	0	0	47056000	0	52433000
AT3G03520.1	non-specific phospholipase C3	11.347	6;1	5;0	0	57537000	0	0	103260000	0	0	0	58469000
AT3G03600.1	ribosomal protein S2	1.6495	1	1	0	0	0	0	0	0	0	0	8722500
AT3G03640.1	beta glucosidase 25	36.837	5	5	141850000	113010000	124090000	127430000	106440000	130990000	150930000	159150000	263360000
AT3G03780.3;AT3G03780.2;AT3G03780.1	methionine synthase 2 ; methionine synthase 2 ; methionine synthase 2	323.31	37;37;37	16;16;16	3276200000	2630700000	3513900000	3048200000	3353300000	3319900000	2921300000	3148800000	3005700000
AT3G03920.1	H/ACA ribonucleoprotein complex, subunit Gar1/Naf1 protein	11.121	3;1	3;1	73649000	41243000	0	0	65061000	0	74826000	79476000	0
AT3G03960.1	TCP-1/cpn60 chaperonin family protein	307.61	19	19	987120000	906420000	884530000	887740000	963060000	862980000	774540000	964650000	868840000
AT3G03990.1	alpha/beta-Hydrolases superfamily protein	1.3972	2	2	0	0	0	0	0	0	0	0	15952000
AT3G04010.1	O-Glycosyl hydrolases family 17 protein	41.41	1	1	20385000	19592000	21103000	0	0	19067000	15809000	14545000	10661000
AT3G04120.1	glyceraldehyde-3-phosphate dehydrogenase C subunit 1	205.98	26	2	3201700000	2480900000	4179800000	1623200000	2611100000	2637400000	3231600000	3563200000	2196000000
AT3G04400.2	Ribosomal protein L14p/L23e family protein	72.902	8	1	676250000	636720000	743850000	919040000	1012500000	891520000	750870000	861060000	772860000
AT3G04480.1	endoribonucleases	2.9202	1	1	0	0	0	0	0	0	0	5625100	0
AT3G04520.2;AT3G04520.1	threonine aldolase 2 ; threonine aldolase 2	6.5942	2;2	2;2	0	0	0	0	0	0	0	0	16290000
AT3G04600.3;AT3G04600.2;AT3G04600.1	Nucleotidylyl transferase superfamily protein ; Nucleotidylyl transferase superfamily protein ; Nucleotidylyl transferase superfamily protein	39.747	6;6;6	6;6;6	150380000	151980000	139330000	126120000	122780000	164170000	133090000	156010000	126720000
AT3G04610.1	RNA-binding KH domain-containing protein	27.034	3	3	30276000	36246000	36190000	40463000	29744000	43590000	50377000	49859000	58888000
AT3G04710.2;AT3G04710.1;AT3G04710.3	ankyrin repeat family protein ; ankyrin repeat family protein ; ankyrin repeat family protein	53.516	4;4;4	4;4;4	0	0	103460000	93089000	78140000	105730000	0	0	73649000
AT3G04720.1	pathogenesis-related 4	24.151	3	3	223260000	93384000	76005000	100320000	91144000	85351000	110640000	104880000	194830000
AT3G04780.1	Protein of unknown function (DUF1000)	45.18	3	3	101410000	107150000	106970000	0	105740000	97838000	170520000	80542000	98107000
AT3G04790.1	Ribose 5-phosphate isomerase, type A protein	32.615	3	3	118570000	0	115390000	95847000	92723000	0	0	0	131890000
AT3G04820.1	Pseudouridine synthase family protein	1.4185	1	1	0	0	0	0	0	0	0	8189700	0
AT3G04830.2;AT3G04830.1	Protein prenylyltransferase superfamily protein ; Protein prenylyltransferase superfamily protein	3.4364	3;3	2;2	44046000	45296000	45494000	49770000	60705000	50147000	40317000	46737000	44472000
AT3G04840.1	Ribosomal protein S3Ae	165.13	13	7	1374600000	1141200000	1113400000	1123700000	1308400000	1389400000	1226700000	1518800000	1384100000
AT3G04880.1	DNA-damage-repair/toleration protein (DRT102)	60.321	6	6	77740000	84031000	103050000	80582000	105300000	82373000	65393000	71785000	64248000
AT3G04920.1	Ribosomal protein S24e family protein	30.171	4	2	0	397690000	442420000	0	0	408190000	354990000	405800000	358050000
AT3G04940.1	cysteine synthase D1	13.254	4	2	45213000	50851000	72840000	61213000	47835000	45313000	56955000	60386000	56220000
AT3G05020.1	acyl carrier protein 1	164.63	1	1	0	888280000	874790000	948720000	775610000	994490000	223320000	781030000	376700000
AT3G05050.1	Protein kinase superfamily protein	4.1946	1	1	0	0	0	0	0	0	0	0	1608200
AT3G05060.1	NOP56-like pre RNA processing ribonucleoprotein	105.25	12	8	275700000	283190000	308910000	323950000	364640000	274970000	251330000	227230000	256080000
AT3G05420.2	acyl-CoA binding protein 4	51.6	10	1	117440000	108290000	146320000	115540000	133380000	145920000	114060000	115330000	139500000
AT3G05520.1;AT3G05520.2	Subunits of heterodimeric actin filament capping protein Capz superfamily ; Subunits of heterodimeric actin filament capping protein Capz superfamily	1.9039	2;2	2;2	0	0	0	25756000	0	0	0	0	0
AT3G05530.1;AT1G09100.1	regulatory particle triple-A ATPase 5A ; 26S proteasome AAA-ATPase subunit RPT5B	198.14	15;11;1	14;10;0	633360000	514370000	476130000	541620000	552190000	485720000	520670000	527670000	502010000
AT3G05560.3;AT3G05560.2;AT3G05560.1	Ribosomal L22e protein family ; Ribosomal L22e protein family ; Ribosomal L22e protein family	3.9297	5;5;5	2;2;2	347100000	368120000	334550000	391710000	383820000	505190000	397510000	353790000	400950000
AT3G05900.1	neurofilament protein-related	135.49	17	17	594690000	705440000	534980000	530860000	628650000	597940000	616550000	441900000	569160000
AT3G05970.1	long-chain acyl-CoA synthetase 6	58.196	7	7	201910000	139650000	121820000	163480000	142310000	118190000	168680000	138920000	140920000
AT3G06035.1	Glycoprotein membrane precursor GPI-anchored	13.772	1	1	0	0	0	0	0	0	0	0	24990000
AT3G06050.1	peroxiredoxin IIF	87.702	7	7	687030000	638600000	609260000	704870000	653360000	649580000	770790000	791070000	793700000
AT3G06300.1	P4H isoform 2	35.493	3	2	110080000	84179000	77371000	79826000	141890000	83705000	100680000	90106000	91884000
AT3G06350.1	dehydroquinate dehydratase, putative / shikimate dehydrogenase, putative	112.62	13	13	213650000	190930000	245270000	264190000	207760000	227800000	222970000	253700000	250950000
AT3G06400.1;AT3G06400.2;AT3G06400.3;AT5G18620.1;AT5G18620.2	chromatin-remodeling protein 11 ; chromatin-remodeling protein 11 ; chromatin-remodeling protein 11 ; chromatin remodeling factor17 ; chromatin remodeling factor17	5.8856	4;4;4;4;4	4;4;4;4;4	0	0	0	0	0	0	0	0	27510000
AT3G06510.1;AT3G06510.2	Glycosyl hydrolase superfamily protein ; Glycosyl hydrolase superfamily protein	2.8393	1;1	1;1	0	0	0	0	0	0	0	1096300	0
AT3G06530.3;AT3G06530.1;AT3G06530.2	ARM repeat superfamily protein ; ARM repeat superfamily protein ; ARM repeat superfamily protein	2.0484	3;3;3	3;3;3	0	0	0	0	0	0	0	0	18893000
AT3G06580.1	Mevalonate/galactokinase family protein	77.148	9	9	192390000	202420000	242080000	209480000	186370000	184710000	199060000	190320000	164750000
AT3G06610.1	DNA-binding enhancer protein-related	4.0889	1	1	74771000	64313000	65343000	46776000	63477000	81900000	61788000	72855000	64266000
AT3G06650.1	ATP-citrate lyase B-1	33.576	18	4	313970000	305220000	320080000	267060000	294190000	243080000	255460000	284620000	285360000
AT3G06720.2;AT3G06720.1	importin alpha isoform 1 ; importin alpha isoform 1	180.27	14;14	10;10	461660000	503540000	577340000	543520000	449680000	567240000	511920000	499580000	536270000
AT3G06810.1	acyl-CoA dehydrogenase-related	5.9482	3	3	46335000	0	0	35201000	0	0	0	0	34935000
AT3G06850.2;AT3G06850.1	2-oxoacid dehydrogenases acyltransferase family protein ; 2-oxoacid dehydrogenases acyltransferase family protein	5.6055	2;2	2;2	0	0	0	0	0	0	16160000	0	0
AT3G06860.1	multifunctional protein 2	176.92	23	23	1156600000	1248900000	1377400000	1204500000	1086000000	1335200000	1031200000	1189500000	913410000
AT3G06930.1;AT3G06930.2	protein arginine methyltransferase 4B ; protein arginine methyltransferase 4B	4.1171	3;3	2;2	0	0	0	0	0	0	0	0	28815000
AT3G07050.1	GTP-binding family protein	20.907	3	3	0	0	33021000	0	0	0	0	0	0
AT3G07090.1	PPPDE putative thiol peptidase family protein	10.052	6	6	0	29888000	45756000	32560000	23934000	0	0	30360000	38163000
AT3G07100.1	Sec23/Sec24 protein transport family protein	56.957	11	11	234110000	185420000	194860000	204280000	217220000	209870000	190820000	225340000	216750000
AT3G07110.1;AT3G07110.2	Ribosomal protein L13 family protein ; Ribosomal protein L13 family protein	17.397	8;8	3;3	93553000	95289000	84319000	98042000	114540000	117290000	88417000	94071000	78836000
AT3G07230.1	wound-responsive protein-related	2.319	1	1	0	0	0	0	0	0	0	0	35410000
AT3G07300.2;AT3G07300.1;AT3G07300.3	NagB/RpiA/CoA transferase-like superfamily protein ; NagB/RpiA/CoA transferase-like superfamily protein ; NagB/RpiA/CoA transferase-like superfamily protein	3.0789	2;2;2	2;2;2	0	0	0	0	0	0	28196000	0	0
AT3G07320.1	O-Glycosyl hydrolases family 17 protein	20.715	4	4	96019000	48284000	75240000	70874000	69111000	87032000	51744000	68384000	51515000
AT3G07390.1	auxin-responsive family protein	3.5233	2	2	0	0	193440000	0	82589000	78320000	152440000	167210000	0
AT3G07470.1	Protein of unknown function, DUF538	25.474	2	2	0	0	0	0	0	0	0	0	66459000
AT3G07480.1	2Fe-2S ferredoxin-like superfamily protein	18.772	4	4	124630000	110350000	61542000	63603000	95704000	70614000	101370000	83888000	127530000
AT3G07570.1	Cytochrome b561/ferric reductase transmembrane with DOMON related domain	3.6586	1	1	0	0	0	0	0	0	0	0	14684000
AT3G07590.2;AT3G07590.1;AT4G02840.1;AT4G02840.2	Small nuclear ribonucleoprotein family protein ; Small nuclear ribonucleoprotein family protein ; Small nuclear ribonucleoprotein family protein ; Small nuclear ribonucleoprotein family protein	11.459	2;2;2;2	2;2;2;2	76379000	122000000	134120000	96663000	122030000	147670000	151890000	111400000	121240000
AT3G07660.1	Kinase-related protein of unknown function (DUF1296)	12.371	1	1	0	0	0	0	0	0	0	0	11989000
AT3G07680.1	emp24/gp25L/p24 family/GOLD family protein	37.327	3	3	0	250660000	297310000	228800000	265400000	385390000	192900000	256490000	213880000
AT3G07720.1	Galactose oxidase/kelch repeat superfamily protein	25.143	6	6	48828000	57136000	77443000	51965000	60809000	87288000	73231000	71418000	48884000
AT3G07770.1	HEAT SHOCK PROTEIN 89.1	48.427	18	14	234880000	275520000	293280000	248220000	284480000	298630000	218010000	277070000	305370000
AT3G07880.1	Immunoglobulin E-set superfamily protein	6.9671	2	2	112490000	0	0	103720000	0	0	0	92039000	0
AT3G07980.1;AT3G13530.1	mitogen-activated protein kinase kinase kinase 6 ; mitogen-activated protein kinase kinase kinase 7	1.746	1;1	1;1	0	0	0	0	0	0	0	7560200	0
AT3G08030.2;AT3G08030.1	Protein of unknown function, DUF642 ; Protein of unknown function, DUF642	103.25	13;13	13;13	1419400000	1223700000	1602300000	1100100000	1278700000	1410200000	1257700000	1427700000	1035900000
AT3G08510.3;AT3G08510.2;AT3G08510.1	phospholipase C 2 ; phospholipase C 2 ; phospholipase C 2	5.4005	3;3;3	3;3;3	24869000	25795000	0	25982000	0	18474000	27039000	0	34428000
AT3G08530.1	Clathrin, heavy chain	91.451	64	11	418270000	296610000	316400000	265690000	309140000	341740000	263430000	238220000	284250000
AT3G08580.2;AT3G08580.1	ADP/ATP carrier 1 ; ADP/ATP carrier 1	305.02	13;13	7;7	3365700000	4407400000	4340500000	4847000000	4936000000	4425000000	3627700000	3931500000	3822500000
AT3G08590.2;AT3G08590.1	Phosphoglycerate mutase, 2,3-bisphosphoglycerate-independent ; Phosphoglycerate mutase, 2,3-bisphosphoglycerate-independent	323.31	26;26	20;20	3340600000	2861000000	3050400000	3019400000	3360100000	3231100000	3334400000	3329100000	3319600000
AT3G08610.1	unknown protein; Has 40 Blast hits to 40 proteins in 15 species: Archae - 0; Bacteria - 0; Metazoa - 0; Fungi - 0; Plants - 40; Viruses - 0; Other Eukaryotes - 0 (source: NCBI BLink).	2.7198	1	1	0	0	0	0	0	0	0	0	25234000
AT3G08860.1	PYRIMIDINE 4	2.4008	2	2	0	0	0	0	8357400	0	0	0	0
AT3G08943.1	ARM repeat superfamily protein	133.91	14	3	387300000	374790000	490370000	384010000	419550000	458930000	360930000	329810000	283250000
AT3G08947.1	ARM repeat superfamily protein	17.707	12	1	0	0	0	0	0	0	0	0	26332000
AT3G09090.2;AT3G09090.3;AT3G09090.1	defective in exine formation protein (DEX1) ; defective in exine formation protein (DEX1) ; defective in exine formation protein (DEX1)	5.8041	2;2;2	2;2;2	0	0	0	0	0	0	0	0	13475000
AT3G09200.1;AT3G09200.2	Ribosomal protein L10 family protein ; Ribosomal protein L10 family protein	323.31	11;8;4	3;3;0	2650900000	2875300000	3517200000	2937400000	2513500000	3483400000	2715200000	2799100000	2464000000
AT3G09220.1	laccase 7	63.473	5	5	418010000	351160000	351500000	312070000	326350000	298420000	299160000	336200000	307510000
AT3G09260.1	Glycosyl hydrolase superfamily protein	323.31	31;2	25;1	150480000000	131230000000	138530000000	114270000000	116060000000	136070000000	117520000000	126400000000	113880000000
AT3G09270.1	glutathione S-transferase TAU 8	13.534	3	3	333290000	190810000	177760000	179240000	167210000	191670000	228820000	211340000	210670000
AT3G09300.1	OSBP(oxysterol binding protein)-related protein 3B	46.476	6	2	120220000	96919000	99813000	115630000	112550000	101680000	99802000	124100000	114800000
AT3G09350.3;AT3G09350.2;AT3G09350.1	Fes1A ; Fes1A ; Fes1A	5.0259	2;2;2	2;2;2	32455000	0	0	18786000	0	0	0	26171000	27432000
AT3G09410.1;AT3G09410.3;AT3G09405.1	Pectinacetylesterase family protein ; Pectinacetylesterase family protein ; Pectinacetylesterase family protein	8.8651	2;1;1	2;1;1	0	0	0	0	0	0	30585000	0	0
AT3G09440.2;AT3G09440.1	Heat shock protein 70 (Hsp 70) family protein ; Heat shock protein 70 (Hsp 70) family protein	274.01	30;30	17;17	1647300000	1621700000	1761700000	1421600000	1657900000	1647200000	1530800000	1494100000	1363500000
AT3G55170.2;AT3G55170.1;AT3G09500.1	Ribosomal L29 family protein ; Ribosomal L29 family protein ; Ribosomal L29 family protein	35.161	1;1;1	1;1;1	0	0	0	0	0	0	0	0	228050000
AT3G09630.2;AT3G09630.1	Ribosomal protein L4/L1 family ; Ribosomal protein L4/L1 family	60.694	13;13	5;5	1134100000	992480000	1160100000	1262200000	1477400000	1385600000	1202100000	1246400000	1059000000
AT3G09740.1	syntaxin of plants 71	6.5885	5	5	43779000	53655000	46843000	0	49754000	47250000	58792000	0	29376000
AT3G09810.1	isocitrate dehydrogenase VI	42.834	10	5	123870000	156770000	121590000	0	123830000	166390000	156670000	174080000	173760000
AT3G09820.1;AT3G09820.2	adenosine kinase 1 ; adenosine kinase 1	323.31	18;15	8;6	5134000000	4914400000	5391800000	4929600000	5601400000	5678700000	5818200000	5010700000	5632800000
AT3G09840.1	cell division cycle 48	323.31	46	9	4515600000	3748300000	4169800000	4207000000	3691900000	3977200000	3839100000	4070000000	4222400000
AT3G09890.1	Ankyrin repeat family protein	1.6619	1	1	0	0	0	0	0	0	0	0	10365000
AT3G09940.1;AT3G09940.2	monodehydroascorbate reductase ; monodehydroascorbate reductase	140.6	9;8	9;8	788300000	772830000	826700000	796160000	545650000	700270000	553880000	842820000	645290000
AT3G09970.1;AT3G09960.1	Calcineurin-like metallo-phosphoesterase superfamily protein ; Calcineurin-like metallo-phosphoesterase superfamily protein	2.8723	2;1	2;1	0	23025000	25439000	29401000	0	26037000	25902000	27919000	25283000
AT3G10050.1	L-O-methylthreonine resistant 1	12.108	4	4	21637000	28683000	30627000	30042000	33668000	28366000	36417000	30706000	37862000
AT5G03850.1;AT3G10090.1	Nucleic acid-binding, OB-fold-like protein ; Nucleic acid-binding, OB-fold-like protein	13.439	4;4	4;4	680360000	383680000	445140000	326760000	434900000	322890000	377740000	327010000	397750000
AT3G10210.1	SEC14 cytosolic factor family protein / phosphoglyceride transfer family protein	1.6087	1	1	0	0	0	0	0	0	584660000	0	0
AT3G10220.1	tubulin folding cofactor B	34.39	4	4	68398000	75681000	51767000	93348000	46527000	71238000	91519000	82233000	108480000
AT3G10260.2;AT3G10260.1;AT3G10260.3	Reticulon family protein ; Reticulon family protein ; Reticulon family protein	62.536	2;2;2	2;2;2	36208000	54665000	50284000	59821000	54175000	60847000	51595000	73076000	42885000
AT3G10300.2;AT3G10300.5;AT3G10300.4;AT3G10300.3	Calcium-binding EF-hand family protein ; Calcium-binding EF-hand family protein ; Calcium-binding EF-hand family protein ; Calcium-binding EF-hand family protein	3.3691	2;2;2;2	2;2;2;2	0	33756000	0	0	30190000	54100000	48235000	0	0
AT3G10340.1	phenylalanine ammonia-lyase 4	22.327	8	4	29279000	28760000	29161000	22240000	20807000	27096000	33548000	23799000	37030000
AT3G10370.1	FAD-dependent oxidoreductase family protein	34.132	5	5	0	30324000	0	37922000	28864000	36441000	0	32085000	22194000
AT3G10380.1	subunit of exocyst complex 8	6.6544	8	8	42969000	26406000	0	32225000	0	0	33129000	0	35108000
AT3G10410.1	SERINE CARBOXYPEPTIDASE-LIKE 49	70.317	7	7	206820000	248950000	252570000	276230000	226250000	272920000	184770000	205630000	218350000
AT3G10520.1	haemoglobin 2	5.6223	2	2	29128000	0	26416000	26199000	21479000	27924000	26423000	31961000	32738000
AT3G10620.1	nudix hydrolase homolog 26	10.074	1	1	0	0	0	0	0	25737000	0	0	0
AT3G10660.1;AT5G04870.1	calmodulin-domain protein kinase cdpk isoform 2 ; calcium dependent protein kinase 1	25.109	2;1	2;1	40247000	53201000	0	66731000	56685000	54881000	52612000	70443000	34637000
AT3G10670.1	non-intrinsic ABC protein 7	3.0202	1	1	0	0	0	0	0	0	0	0	35495000
AT3G10690.1	DNA GYRASE A	7.8523	2	2	18156000	34053000	24201000	31716000	35585000	29763000	23685000	22009000	17326000
AT3G10720.2	Plant invertase/pectin methylesterase inhibitor superfamily	3.3524	1	1	0	0	0	0	0	0	0	0	15107000
AT3G10740.1	alpha-L-arabinofuranosidase 1	136.24	12	12	229350000	308070000	239650000	233550000	189860000	166710000	264870000	244580000	181920000
AT3G10850.1	Metallo-hydrolase/oxidoreductase superfamily protein	91.114	5	5	389320000	362670000	360000000	294200000	329930000	351760000	348050000	269240000	270650000
AT3G10920.2;AT3G10920.1	manganese superoxide dismutase 1 ; manganese superoxide dismutase 1	175.1	8;8	8;8	1179600000	1246600000	1609800000	1359600000	1202300000	1336200000	1200700000	1558700000	1449300000
AT5G05460.1;AT3G11040.1	Glycosyl hydrolase family 85 ; Glycosyl hydrolase family 85	3.5372	1;1	1;1	0	0	0	0	0	0	0	0	0
AT3G11070.1	Outer membrane OMP85 family protein	5.3925	3	3	0	0	0	39681000	0	0	0	42848000	29362000
AT3G11130.1	Clathrin, heavy chain	323.31	65	12	4684800000	4371400000	4481700000	4478700000	4841600000	4715200000	4001700000	4153000000	4086700000
AT3G11200.2;AT3G11200.1	alfin-like 2 ; alfin-like 2	1.1168	1;1	1;1	0	0	0	0	0	0	0	0	3184000
AT3G11220.1;AT3G11220.2	Paxneb protein-related ; Paxneb protein-related	1.3011	1;1	1;1	0	0	0	0	0	0	16472000	0	0
AT3G11250.1	Ribosomal protein L10 family protein	34.474	10	2	0	0	128590000	79378000	153880000	0	65805000	66324000	43077000
AT3G11270.1;AT3G11270.2	Mov34/MPN/PAD-1 family protein ; Mov34/MPN/PAD-1 family protein	2.1166	5;4	1;1	0	0	0	0	0	0	0	0	6240400
AT3G11330.1	plant intracellular ras group-related LRR 9	77.229	10	10	144370000	193240000	203430000	145300000	149340000	217100000	145690000	163490000	110310000
AT3G11340.1	UDP-Glycosyltransferase superfamily protein	19.443	7	7	56089000	86990000	75216000	69257000	55581000	67801000	89047000	55496000	68465000
AT3G11400.1;AT3G11400.2	eukaryotic translation initiation factor 3G1 ; eukaryotic translation initiation factor 3G1	26.488	4;4	4;4	132280000	124020000	155010000	148930000	72504000	136320000	119370000	170550000	144760000
AT3G11450.1	DnaJ domain ;Myb-like DNA-binding domain	2.0302	3	2	0	0	39237000	0	0	0	0	0	0
AT3G11510.1;AT2G36160.1	Ribosomal protein S11 family protein ; Ribosomal protein S11 family protein	59.805	7;6	3;2	222760000	221550000	198570000	246420000	252080000	187190000	254150000	227750000	306180000
AT3G11630.1;AT5G06290.1	Thioredoxin superfamily protein ; 2-cysteine peroxiredoxin B	152.6	7;5	7;5	1241200000	1035000000	1270400000	1076700000	1006900000	1241200000	943340000	1089800000	1002500000
AT3G11710.1	lysyl-tRNA synthetase 1	113.13	15	15	468740000	535610000	628820000	581310000	547480000	542040000	487320000	479020000	500910000
AT3G11730.1	Ras-related small GTP-binding family protein	8.4891	1	1	0	0	0	0	0	0	0	0	10456000
AT3G11770.1	Polynucleotidyl transferase, ribonuclease H-like superfamily protein	28.877	1	1	0	0	0	0	0	0	0	0	25466000
AT3G11780.1;AT3G11780.2	MD-2-related lipid recognition domain-containing protein / ML domain-containing protein ; MD-2-related lipid recognition domain-containing protein / ML domain-containing protein	50.984	2;2	2;2	147220000	138820000	0	0	113870000	139360000	143440000	111740000	156690000
AT3G11830.1;AT3G11830.2	TCP-1/cpn60 chaperonin family protein ; TCP-1/cpn60 chaperonin family protein	323.31	22;21	22;21	989330000	1169400000	1221900000	1113200000	1371500000	1160700000	1108500000	1132600000	1092200000
AT3G11910.2;AT3G11910.1	ubiquitin-specific protease 13 ; ubiquitin-specific protease 13	200.57	24;24	12;12	460720000	367370000	477070000	407770000	355160000	453920000	345380000	329910000	373170000
AT3G11930.1;AT3G11930.2;AT3G11930.4;AT3G11930.3	Adenine nucleotide alpha hydrolases-like superfamily protein ; Adenine nucleotide alpha hydrolases-like superfamily protein ; Adenine nucleotide alpha hydrolases-like superfamily protein ; Adenine nucleotide alpha hydrolases-like superfamily protein	2.6627	2;2;2;2	2;2;2;2	0	0	0	0	0	0	0	51162000	0
AT3G11940.2;AT3G11940.1	ribosomal protein 5A ; ribosomal protein 5A	106.93	6;6	1;1	0	0	0	0	0	0	0	0	127530000
AT3G12050.1;AT3G12050.2	Aha1 domain-containing protein ; Aha1 domain-containing protein	36.8	6;4	6;4	207130000	216630000	176990000	188670000	159490000	197690000	268530000	211760000	260360000
AT3G12110.1	actin-11	5.1335	13	1	21352000	30864000	25585000	0	0	27195000	31178000	28196000	30510000
AT3G12120.2;AT3G12120.1	fatty acid desaturase 2 ; fatty acid desaturase 2	9.9534	1;1	1;1	0	0	0	0	0	0	0	0	13453000
AT3G12140.2;AT3G12140.1;AT3G12140.3	Emsy N Terminus (ENT)/ plant Tudor-like domains-containing protein ; Emsy N Terminus (ENT)/ plant Tudor-like domains-containing protein ; Emsy N Terminus (ENT)/ plant Tudor-like domains-containing protein	2.9486	1;1;1	1;1;1	0	0	0	0	0	0	0	0	14362000
AT3G12260.1	LYR family of Fe/S cluster biogenesis protein	48.839	4	4	199290000	222310000	194280000	241390000	180920000	214050000	252400000	260680000	386400000
AT3G12290.1	Amino acid dehydrogenase family protein	103	11	11	683350000	719850000	764780000	918380000	770390000	766190000	849320000	754850000	831260000
AT3G12370.1	Ribosomal protein L10 family protein	2.0572	1	1	0	0	0	0	0	0	0	0	13292000
AT3G12390.1	Nascent polypeptide-associated complex (NAC), alpha subunit family protein	133.57	8	5	1111100000	1069500000	1222300000	1018700000	1091600000	1104300000	922190000	1098300000	897860000
AT3G12490.1;AT3G12490.2	cystatin B ; cystatin B	7.2002	4;4	4;4	182280000	111310000	215590000	119280000	124300000	132000000	133830000	156430000	114360000
AT3G12500.1	basic chitinase	179.76	8	8	1250300000	897010000	1327700000	836620000	653260000	895020000	976980000	1059700000	1092100000
AT3G12580.1	heat shock protein 70	108.28	24;4	9;1	161540000	136420000	146690000	99291000	197860000	160090000	140400000	134130000	101860000
AT3G12600.2;AT3G12600.1	nudix hydrolase homolog 16 ; nudix hydrolase homolog 16	2.9311	2;2	2;2	0	0	0	0	0	0	0	0	27440000
AT3G12640.1	RNA binding (RRM/RBD/RNP motifs) family protein	1.6191	1	1	0	0	0	0	0	0	0	0	4525300
AT3G12670.1	CTP synthase family protein	13.411	6;1	5;0	55068000	79132000	101210000	74798000	92326000	99023000	44123000	88404000	56383000
AT3G12700.1	Eukaryotic aspartyl protease family protein	2.9206	1	1	0	0	0	0	0	0	0	0	25652000
AT3G12780.1	phosphoglycerate kinase 1	110.55	18	8	811490000	746710000	850420000	812320000	760530000	755780000	818910000	789310000	735440000
AT3G12800.1	short-chain dehydrogenase-reductase B	12.969	5;1	5;1	144610000	183410000	149550000	187670000	181940000	189800000	194140000	187570000	189980000
AT3G12915.1;AT3G12915.2	Ribosomal protein S5/Elongation factor G/III/V family protein ; Ribosomal protein S5/Elongation factor G/III/V family protein	1.4566	16;14	1;1	0	0	0	0	0	0	0	0	31971000
AT3G13110.1	serine acetyltransferase 2;2	14.849	4	4	71960000	79757000	110860000	109800000	94256000	93741000	111340000	115620000	88114000
AT3G13160.1	Tetratricopeptide repeat (TPR)-like superfamily protein	22.318	5	5	155800000	196320000	159550000	190780000	186690000	134170000	77850000	132010000	100250000
AT3G13235.3;AT3G13235.2;AT3G13235.1	ubiquitin family protein ; ubiquitin family protein ; ubiquitin family protein	43.06	6;6;6	6;6;6	203930000	236570000	212770000	228600000	178790000	218180000	215570000	193970000	184610000
AT3G13300.2;AT3G13300.1	Transducin/WD40 repeat-like superfamily protein ; Transducin/WD40 repeat-like superfamily protein	79.405	16;16	11;11	296400000	365420000	365660000	403610000	377480000	444690000	424640000	442970000	371870000
AT3G13330.1	proteasome activating protein 200	8.6955	5	5	75636000	0	87858000	57277000	76801000	79248000	50603000	0	46283000
AT3G13460.2;AT3G13460.4;AT3G13460.1;AT3G13460.3	evolutionarily conserved C-terminal region 2 ; evolutionarily conserved C-terminal region 2 ; evolutionarily conserved C-terminal region 2 ; evolutionarily conserved C-terminal region 2	113.88	5;5;5;3	5;5;5;3	82096000	74020000	53332000	65575000	91511000	106110000	60644000	71185000	93872000
AT3G13470.1	TCP-1/cpn60 chaperonin family protein	9.7237	14	1	0	0	0	0	0	0	0	0	40697000
AT3G13570.1	SC35-like splicing factor 30A	22.761	3;1;1;1	3;1;1;1	124510000	137990000	96234000	132630000	95114000	130400000	124830000	193630000	164010000
AT3G13610.1	2-oxoglutarate (2OG) and Fe(II)-dependent oxygenase superfamily protein	4.1688	2	2	42079000	0	0	0	38418000	0	0	0	35337000
AT3G13710.1	prenylated RAB acceptor 1.F4	7.3802	1	1	0	0	0	0	0	0	0	0	20527000
AT3G13720.1	PRA1 (Prenylated rab acceptor) family protein	1.9214	1	1	0	0	0	0	0	0	0	0	24935000
AT3G13772.1;AT1G55130.1	transmembrane nine 7 ; Endomembrane protein 70 protein family	2.778	2;1	2;1	0	0	0	0	0	0	0	83798000	0
AT3G13790.2;AT3G13790.1	Glycosyl hydrolases family 32 protein ; Glycosyl hydrolases family 32 protein	130.82	11;11;1;1;1	11;11;1;1;1	866770000	933600000	833160000	846560000	800550000	817940000	731820000	882370000	849230000
AT3G13860.1	heat shock protein 60-3A	65.74	15	15	364930000	323310000	338440000	365320000	305030000	344530000	366960000	360700000	368220000
AT3G13870.1;AT3G13870.2	Root hair defective 3 GTP-binding protein (RHD3) ; Root hair defective 3 GTP-binding protein (RHD3)	100.63	15;14;4;1	15;14;4;1	362910000	209570000	239660000	242780000	195080000	280400000	218820000	220070000	210830000
AT3G13920.1;AT3G13920.3;AT3G13920.4;AT3G13920.2	eukaryotic translation initiation factor 4A1 ; eukaryotic translation initiation factor 4A1 ; eukaryotic translation initiation factor 4A1 ; eukaryotic translation initiation factor 4A1	323.31	26;25;25;24	6;5;6;6	3829600000	4718200000	5068000000	4865200000	4934800000	5019600000	5007500000	4773600000	4474900000
AT3G13930.1	Dihydrolipoamide acetyltransferase, long form protein	98.658	12	9	986920000	841200000	743990000	834930000	1055100000	777960000	852910000	873010000	1016400000
AT3G14010.4;AT3G14010.3;AT3G14010.2;AT3G14010.1	CTC-interacting domain 4 ; CTC-interacting domain 4 ; CTC-interacting domain 4 ; CTC-interacting domain 4	1.3193	1;1;1;1	1;1;1;1	0	0	0	0	0	0	0	0	20104000
AT3G14067.1	Subtilase family protein	323.31	14	14	1626300000	1246500000	1288800000	1282800000	1151000000	1101900000	1126200000	1184900000	1242100000
AT3G14080.2;AT3G14080.1	Small nuclear ribonucleoprotein family protein ; Small nuclear ribonucleoprotein family protein	2.4227	1;1	1;1	0	0	0	0	0	0	0	0	12572000
AT3G14100.1	RNA-binding (RRM/RBD/RNP motifs) family protein	15.578	4	2	72728000	69625000	93271000	74677000	84270000	84636000	67864000	101240000	80075000
AT3G14150.2;AT3G14150.1;AT3G14130.1	Aldolase-type TIM barrel family protein ; Aldolase-type TIM barrel family protein ; Aldolase-type TIM barrel family protein	2.952	2;2;2	2;2;2	0	0	0	0	79927000	75862000	0	0	0
AT3G14290.1	20S proteasome alpha subunit E2	10.599	10	2	44117000	31626000	28948000	27613000	28970000	0	0	0	22590000
AT3G14310.1	pectin methylesterase 3	323.31	15	13	1345400000	1340500000	1023400000	1226000000	1219600000	1001200000	1600200000	1257700000	1738300000
AT3G14390.1	Pyridoxal-dependent decarboxylase family protein	18.779	7	3	227150000	217040000	108590000	209300000	202040000	214540000	272290000	197680000	335120000
AT3G14680.1	cytochrome P450, family 72, subfamily A, polypeptide 14	1.1495	1	1	0	0	0	0	0	0	0	0	824290
AT3G14690.1;AT3G14630.1;AT3G14650.1;AT3G14660.1	cytochrome P450, family 72, subfamily A, polypeptide 15 ; cytochrome P450, family 72, subfamily A, polypeptide 9 ; cytochrome P450, family 72, subfamily A, polypeptide 11 ; cytochrome P450, family 72, subfamily A, polypeptide 13	1.312	2;1;1;1	2;1;1;1	0	0	0	0	0	0	8094600	0	0
AT3G14790.1	rhamnose biosynthesis 3	5.5292	15	4	33648000	49261000	37502000	38732000	44495000	40725000	47730000	39165000	43751000
AT3G14920.1	Peptide-N4-(N-acetyl-beta-glucosaminyl)asparagine amidase A protein	18.376	4	4	121220000	106340000	98731000	122090000	87709000	151840000	100300000	106810000	0
AT3G14940.1	phosphoenolpyruvate carboxylase 3	228.06	51;1	22;0	1705700000	1806100000	1979400000	2329000000	1773300000	2161200000	2079600000	2118400000	1969000000
AT3G14990.1;AT3G14990.3;AT3G14990.2	Class I glutamine amidotransferase-like superfamily protein ; Class I glutamine amidotransferase-like superfamily protein ; Class I glutamine amidotransferase-like superfamily protein	323.31	18;17;17	18;17;17	7354100000	7692700000	9458900000	8270100000	6851700000	7275500000	8329600000	7938400000	7503500000
AT3G15000.1	cobalt ion binding	4.7799	3	3	0	0	0	0	130370000	128520000	0	0	0
AT3G15010.2;AT3G15010.1	RNA-binding (RRM/RBD/RNP motifs) family protein ; RNA-binding (RRM/RBD/RNP motifs) family protein	23.858	2;2	2;2	0	16790000	0	23609000	19573000	20651000	0	0	7198800
AT3G15020.1;AT3G15020.2	Lactate/malate dehydrogenase family protein ; Lactate/malate dehydrogenase family protein	323.31	14;13	5;5	3926900000	4328400000	5086900000	4621800000	3989400000	4198400000	4959800000	5149800000	3865800000
AT3G15090.1	GroES-like zinc-binding alcohol dehydrogenase family protein	10.4	6	6	84017000	0	0	72686000	91549000	101290000	74163000	0	85543000
AT3G15260.2;AT3G15260.1	Protein phosphatase 2C family protein ; Protein phosphatase 2C family protein	2.4364	4;4;1	2;2;0	0	0	0	0	0	0	0	0	14161000
AT3G15290.1	3-hydroxyacyl-CoA dehydrogenase family protein	3.2576	2	2	29790000	0	0	0	20930000	26727000	30986000	0	0
AT3G15450.3;AT3G15450.2;AT3G15450.1	Aluminium induced protein with YGL and LRDR motifs ; Aluminium induced protein with YGL and LRDR motifs ; Aluminium induced protein with YGL and LRDR motifs	7.7922	1;1;1	1;1;1	0	0	0	0	0	0	0	0	1870500
AT3G15610.1	Transducin/WD40 repeat-like superfamily protein	5.6435	4	1	0	0	0	0	0	0	0	0	18190000
AT3G15620.2;AT3G15620.1	DNA photolyase family protein ; DNA photolyase family protein	2.294	2;2	2;2	0	0	44254000	0	0	739830000	0	43388000	0
AT3G15640.2;AT3G15640.1	Rubredoxin-like superfamily protein ; Rubredoxin-like superfamily protein	24.518	5;5	4;4	283070000	348890000	301500000	364160000	279170000	452990000	249400000	280220000	191930000
AT3G15660.2;AT3G15660.1	glutaredoxin 4 ; glutaredoxin 4	10.273	3;3	3;3	71638000	68395000	69766000	78617000	70779000	55793000	95655000	95418000	77781000
AT3G15690.2	Single hybrid motif superfamily protein	2.9649	1	1	0	0	0	0	0	0	0	0	40081000
AT3G15730.1	phospholipase D alpha 1	323.31	37	30	5013500000	4548600000	5839300000	4410900000	4417100000	4871300000	4749800000	4713200000	4101100000
AT3G15790.1	methyl-CPG-binding domain 11	5.2724	3	3	0	0	0	0	0	0	0	0	50437000
AT3G15950.1;AT3G15950.2	DNA topoisomerase-related ; DNA topoisomerase-related	323.31	42;40	42;40	12075000000	11619000000	9745300000	9549300000	9097000000	8515200000	10577000000	10757000000	12325000000
AT3G15980.1;AT3G15980.4;AT3G15980.3;AT3G15980.2;AT3G15980.5	Coatomer, beta subunit ; Coatomer, beta subunit ; Coatomer, beta subunit ; Coatomer, beta subunit ; Coatomer, beta subunit	73.756	16;16;16;16;15	6;6;6;6;5	477820000	494670000	600040000	539810000	597590000	573770000	498830000	424510000	477980000
AT3G16050.1	pyridoxine biosynthesis 1.2	28.17	2	2	0	0	0	0	0	0	0	0	33857000
AT3G16110.1	PDI-like 1-6	29.307	7;2	7;2	537150000	453770000	584980000	587130000	499050000	510270000	472040000	503330000	524280000
AT3G16240.1	delta tonoplast integral protein	18.578	2	2	0	62824000	51707000	65318000	65359000	87385000	60695000	59513000	43418000
AT3G16270.1	ENTH/VHS family protein	7.7123	2	2	34116000	31869000	21652000	29186000	28428000	36048000	33203000	32260000	48213000
AT3G16370.1	GDSL-like Lipase/Acylhydrolase superfamily protein	13.529	1	1	0	0	0	0	0	0	0	0	7975700
AT3G16390.1	nitrile specifier protein 3	1.2272	6	2	0	0	0	0	0	0	0	0	19227000
AT3G16400.2;AT3G16400.1	nitrile specifier protein 1 ; nitrile specifier protein 1	323.31	26;26	9;9	6814100000	5336300000	5768100000	4846900000	4450200000	5510600000	4825600000	5361800000	4970300000
AT3G16410.1	nitrile specifier protein 4	323.31	27	11	16352000000	16729000000	16335000000	14008000000	12004000000	13339000000	14659000000	15901000000	17397000000
AT3G16420.3;AT3G16420.2;AT3G16420.1	PYK10-binding protein 1 ; PYK10-binding protein 1 ; PYK10-binding protein 1	323.31	14;14;14	12;12;12	25448000000	25106000000	26818000000	24103000000	20418000000	27478000000	22720000000	27791000000	21794000000
AT3G16430.2;AT3G16430.1	jacalin-related lectin 31 ; jacalin-related lectin 31	137.95	10;10	8;8	1034200000	845240000	1180100000	991420000	1230300000	1056400000	1075400000	1174800000	903090000
AT3G16440.1	myrosinase-binding protein-like protein-300B	16.459	4	4	66813000	71215000	66457000	63178000	66021000	67194000	86741000	61405000	100380000
AT3G16450.3;AT3G16450.2;AT3G16450.1	Mannose-binding lectin superfamily protein ; Mannose-binding lectin superfamily protein ; Mannose-binding lectin superfamily protein	323.31	12;12;12	12;12;12	10773000000	9190800000	6798500000	6330800000	6252300000	7471200000	7407900000	7482800000	8594600000
AT3G16460.2;AT3G16460.1	Mannose-binding lectin superfamily protein ; Mannose-binding lectin superfamily protein	323.31	21;21	21;21	15781000000	13696000000	11870000000	12493000000	12545000000	13667000000	11583000000	11951000000	12017000000
AT3G16470.2;AT3G16470.1;AT3G16470.3	Mannose-binding lectin superfamily protein ; Mannose-binding lectin superfamily protein ; Mannose-binding lectin superfamily protein	323.31	14;14;11	14;14;11	3303900000	3015700000	3274200000	2862100000	2966700000	2780300000	2795600000	2773000000	3010000000
AT3G16480.1	mitochondrial processing peptidase alpha subunit	124.5	9	2	64324000	52783000	51219000	66771000	58836000	60302000	53051000	52789000	45267000
AT3G16530.1	Legume lectin family protein	108.92	6;1	6;1	290150000	260760000	287580000	283970000	249740000	294300000	309700000	384030000	228590000
AT3G16565.1;AT3G16565.2	alanine-tRNA ligases;nucleic acid binding;ligases, forming aminoacyl-tRNA and related compounds;nucleotide binding;ATP binding ; alanine-tRNA ligases;nucleic acid binding;ligases, forming aminoacyl-tRNA and related compounds;nucleotide binding;ATP binding	2.4894	2;2	2;2	0	0	0	0	0	0	0	90631000	0
AT3G16640.1	translationally controlled tumor protein	134.71	8	8	2513900000	2390100000	2736600000	2306300000	2147100000	2436000000	2763900000	2394300000	1855500000
AT3G16780.1	Ribosomal protein L19e family protein	9.406	1	1	0	0	0	0	0	0	0	0	32605000
AT3G16810.1	pumilio 24	1.4381	1	1	0	0	0	0	0	0	0	0	6451900
AT3G16830.1	TOPLESS-related 2	1.185	6	2	0	0	0	0	0	0	0	13611000	0
AT3G16910.1	acyl-activating enzyme 7	43.026	6	6	198360000	148590000	112520000	112370000	142960000	140190000	153680000	156860000	129360000
AT3G16950.1;AT3G16950.2	lipoamide dehydrogenase 1 ; lipoamide dehydrogenase 1	63.487	10;10	3;3	330500000	473490000	711800000	587850000	422940000	537580000	486410000	577290000	445970000
AT3G17020.1	Adenine nucleotide alpha hydrolases-like superfamily protein	118.51	8	8	662910000	555700000	593150000	650080000	605860000	543690000	604600000	729610000	910380000
AT3G17210.1	heat stable protein 1	172.86	5	5	870460000	644400000	1028300000	892810000	696730000	723050000	911470000	1013800000	864740000
AT3G17240.3;AT3G17240.1	lipoamide dehydrogenase 2 ; lipoamide dehydrogenase 2	108.69	15;15	8;8	646450000	567640000	671990000	640580000	610250000	693890000	655580000	640730000	479970000
AT3G17390.1	S-adenosylmethionine synthetase family protein	323.31	20	13	9302400000	9074200000	8955500000	9551500000	10202000000	8984300000	8665600000	9189500000	11049000000
AT3G17410.1	Protein kinase superfamily protein	36.005	5;2;2;2;2;2;2;1;1;1;1	4;1;1;1;1;1;1;0;0;0;0	38926000	49302000	44010000	56711000	32025000	41191000	40278000	49575000	45489000
AT3G17440.2;AT3G17440.1	novel plant snare 13 ; novel plant snare 13	1.8023	1;1	1;1	0	0	0	0	0	0	0	0	17988000
AT3G17465.1	ribosomal protein L3 plastid	4.1289	2	2	39647000	0	43306000	35352000	30568000	0	0	30214000	31947000
AT3G17770.1	Dihydroxyacetone kinase	9.8798	3	3	0	37651000	34122000	34625000	37219000	37335000	40652000	53883000	50449000
AT3G17810.1	pyrimidine 1	173.28	17	17	1066000000	882800000	1008600000	838010000	793820000	957310000	890280000	879620000	1118100000
AT3G17820.1	glutamine synthetase 1.3	323.31	15	10	850190000	719560000	820900000	681550000	544160000	741280000	587380000	554640000	663510000
AT3G17840.1	receptor-like kinase 902	2.7243	1	1	0	0	0	0	0	0	0	0	5178100
AT3G17880.2;AT3G17880.1	tetraticopeptide domain-containing thioredoxin ; tetraticopeptide domain-containing thioredoxin	3.2138	2;2	2;2	0	0	0	0	0	0	28626000	0	0
AT3G17900.1	unknown protein; FUNCTIONS IN: molecular_function unknown; INVOLVED IN: biological_process unknown; LOCATED IN: cellular_component unknown; EXPRESSED IN: 23 plant structures; EXPRESSED DURING: 13 growth stages; Has 45 Blast hits to 44 proteins in 14 speci	6.8231	2	2	0	0	0	0	0	0	0	27582000	0
AT3G17910.1	Surfeit locus 1 cytochrome c oxidase biogenesis protein	1.1874	1	1	0	0	0	0	0	0	0	0	5445500
AT3G17940.1	Galactose mutarotase-like superfamily protein	116.72	8	8	548560000	445860000	535850000	459110000	447100000	468820000	431590000	392810000	458700000
AT3G18000.1	S-adenosyl-L-methionine-dependent methyltransferases superfamily protein	18.33	8	1	0	0	0	46185000	43791000	53939000	51552000	53688000	38563000
AT3G18035.1	winged-helix DNA-binding transcription factor family protein	1.1176	1	1	0	0	0	0	0	4281900	0	0	0
AT3G18060.1	transducin family protein / WD-40 repeat family protein	122.81	11	11	357880000	357150000	364370000	332330000	308360000	355620000	338750000	288380000	403850000
AT3G18130.1	receptor for activated C kinase 1C	109.8	14	4	277480000	300830000	251650000	275090000	296620000	352980000	232450000	292640000	275740000
AT3G18165.1	modifier of snc1,4	2.6435	1	1	0	0	0	0	0	0	0	0	7584900
AT3G18190.1	TCP-1/cpn60 chaperonin family protein	211.36	19	19	812950000	951840000	881530000	927720000	963740000	982010000	976960000	1061500000	1053200000
AT3G18420.1	Protein prenylyltransferase superfamily protein	5.1865	2	2	0	0	0	0	0	0	0	0	2985700
AT3G18490.1	Eukaryotic aspartyl protease family protein	4.229	1	1	0	0	0	0	0	0	0	20028000	0
AT3G18600.1	P-loop containing nucleoside triphosphate hydrolases superfamily protein	6.0741	3	3	9216600	6330400	11215000	9695100	8535100	12215000	32210000	9750100	7760400
AT3G18740.1;AT1G36240.1	Ribosomal protein L7Ae/L30e/S12e/Gadd45 family protein ; Ribosomal protein L7Ae/L30e/S12e/Gadd45 family protein	2.8736	5;4	2;1	0	0	90938000	104750000	144250000	0	101790000	142980000	138070000
AT3G18860.2;AT3G18860.1	transducin family protein / WD-40 repeat family protein ; transducin family protein / WD-40 repeat family protein	7.8123	5;5	5;5	39393000	41246000	0	50373000	37185000	0	47263000	46713000	73409000
AT3G18940.1	clast3-related	2.597	2	2	0	0	0	20093000	0	0	0	0	0
AT3G19000.2;AT3G19000.1	2-oxoglutarate (2OG) and Fe(II)-dependent oxygenase superfamily protein ; 2-oxoglutarate (2OG) and Fe(II)-dependent oxygenase superfamily protein	2.7361	1;1	1;1	0	0	0	0	0	0	5445900	0	0
AT3G19010.1;AT3G19010.2;AT3G19010.3	2-oxoglutarate (2OG) and Fe(II)-dependent oxygenase superfamily protein ; 2-oxoglutarate (2OG) and Fe(II)-dependent oxygenase superfamily protein ; 2-oxoglutarate (2OG) and Fe(II)-dependent oxygenase superfamily protein	19.177	9;7;7	9;7;7	184440000	178430000	189900000	172300000	141990000	172260000	198210000	175180000	172640000
AT3G19170.2;AT3G19170.1	presequence protease 1 ; presequence protease 1	25.126	8;8;1;1;1	8;8;1;1;1	47628000	84157000	171940000	119240000	97002000	92102000	71798000	59178000	59758000
AT3G19340.1	Protein of unknown function (DUF3754)	9.7154	3	3	55894000	44331000	48222000	61817000	58515000	57148000	47362000	0	0
AT3G19390.1	Granulin repeat cysteine protease family protein	56.815	3	3	404710000	502200000	492580000	504370000	416090000	433040000	382890000	461930000	389030000
AT3G19400.2;AT3G19400.1	Cysteine proteinases superfamily protein ; Cysteine proteinases superfamily protein	19.691	2;2	2;2	64881000	60814000	0	64238000	0	0	44666000	63870000	59343000
AT3G19420.1	PTEN 2	11.383	4	4	24598000	21259000	13349000	15414000	13750000	17282000	18469000	14769000	17973000
AT3G19450.1	GroES-like zinc-binding alcohol dehydrogenase family protein	323.31	17	16	2268400000	2212200000	2316500000	2290200000	2182700000	2061900000	2381500000	2045400000	2440700000
AT3G19710.1	branched-chain aminotransferase4	27.975	3	3	28498000	48195000	83994000	53483000	69910000	55803000	53669000	90075000	35734000
AT3G19740.1	P-loop containing nucleoside triphosphate hydrolases superfamily protein	5.2173	2	1	22207000	0	0	26403000	0	34244000	26787000	34693000	16126000
AT3G19760.1	eukaryotic initiation factor 4A-III	97.149	12;1	11;1	334960000	337580000	365270000	361620000	430490000	372330000	374770000	352860000	321150000
AT3G19770.1	Vacuolar sorting protein 9 (VPS9) domain	9.1154	2	2	0	0	0	0	0	0	0	20062000	0
AT3G19820.3;AT3G19820.2;AT3G19820.1	cell elongation protein / DWARF1 / DIMINUTO (DIM) ; cell elongation protein / DWARF1 / DIMINUTO (DIM) ; cell elongation protein / DWARF1 / DIMINUTO (DIM)	193.87	22;22;22	22;22;22	1379200000	1484500000	1322600000	1509300000	1743400000	1614100000	1179800000	1352400000	1497000000
AT3G19920.1	unknown protein; BEST Arabidopsis thaliana protein match is: unknown protein (TAIR:AT5G64230.1); Has 217 Blast hits to 217 proteins in 16 species: Archae - 0; Bacteria - 2; Metazoa - 0; Fungi - 0; Plants - 215; Viruses - 0; Other Eukaryotes - 0 (source: N	1.2462	1	1	0	0	0	0	0	0	0	0	17938000
AT3G20000.1	translocase of the outer mitochondrial membrane 40	56.66	5	5	314920000	243830000	201030000	316140000	326160000	277720000	218740000	282080000	272630000
AT3G20050.1	T-complex protein 1 alpha subunit	194.8	14	14	590960000	837700000	973080000	863240000	845430000	864740000	735260000	724940000	692230000
AT3G20250.1;AT4G25880.2;AT4G25880.3;AT4G25880.1	pumilio 5 ; pumilio 6 ; pumilio 6 ; pumilio 6	6.2527	2;1;1;1	2;1;1;1	34727000	40925000	33830000	37812000	32387000	34071000	40716000	36025000	0
AT3G20330.1	PYRIMIDINE B	8.8893	5	5	72442000	80615000	52811000	66910000	58407000	65168000	78394000	59738000	86973000
AT3G20370.1	TRAF-like family protein	261.07	11	11	2970500000	2476500000	2432000000	2451100000	2313400000	2260300000	2091100000	2037000000	2214700000
AT3G20390.1	endoribonuclease L-PSP family protein	55.102	8	8	307940000	278330000	449680000	266410000	248640000	242890000	290320000	315510000	224020000
AT3G20410.1	calmodulin-domain protein kinase 9	60.658	7;2	6;2	124760000	146090000	103680000	98416000	101410000	121320000	96486000	109110000	116040000
AT3G20560.1	PDI-like 5-3	3.7792	2	2	0	0	0	0	18004000	24836000	31976000	0	0
AT3G20570.1	early nodulin-like protein 9	2.1811	1	1	0	0	0	0	0	0	0	30157000	0
AT3G20630.1	ubiquitin-specific protease 14	29.272	9	9	327680000	273820000	314540000	366900000	317100000	286220000	339000000	394150000	318430000
AT3G20790.1	NAD(P)-binding Rossmann-fold superfamily protein	11.698	3	3	0	0	0	0	0	0	0	0	31543000
AT5G12980.1;AT3G20800.1	Cell differentiation, Rcd1-like protein ; Cell differentiation, Rcd1-like protein	2.3301	1;1	1;1	0	0	0	0	0	0	0	0	9831800
AT3G20890.1	RNA-binding (RRM/RBD/RNP motifs) family protein	1.3742	1	1	0	0	0	0	0	0	0	0	5515200
AT3G20970.2;AT3G20970.1	NFU domain protein 4 ; NFU domain protein 4	9.132	2;2	2;2	0	0	0	0	0	0	0	0	31273000
AT3G21060.1	Transducin/WD40 repeat-like superfamily protein	1.3018	1	1	0	0	0	0	0	0	0	0	4175600
AT3G21110.2;AT3G21110.1	purin 7 ; purin 7	4.6328	1;1	1;1	0	0	0	0	0	17267000	0	0	0
AT3G21140.1	Pyridoxamine 5-phosphate oxidase family protein	1.8144	2	2	0	14228000	0	31421000	0	0	20074000	24237000	0
AT3G21160.1;AT1G51590.2;AT1G51590.1	alpha-mannosidase 2 ; alpha-mannosidase 1 ; alpha-mannosidase 1	3.8001	2;1;1	2;1;1	0	0	0	0	0	0	0	0	39065000
AT3G21240.1	4-coumarate:CoA ligase 2	14.355	4	3	75238000	149080000	148460000	134680000	109060000	151920000	109240000	104800000	74111000
AT3G21510.1	histidine-containing phosphotransmitter 1	3.09	1	1	0	0	0	0	0	0	0	0	8896600
AT3G21540.1	transducin family protein / WD-40 repeat family protein	5.7118	1	1	0	0	0	0	0	0	0	0	4381600
AT3G21630.1	chitin elicitor receptor kinase 1	3.2182	3	3	26740000	29223000	23183000	35312000	26150000	29366000	39353000	28058000	21889000
AT3G21770.1	Peroxidase superfamily protein	19.459	5	4	160820000	219260000	198130000	247970000	167030000	123430000	190540000	283560000	195410000
AT3G21820.1	histone-lysine N-methyltransferase ATXR2	11.961	1	1	0	0	0	0	0	0	0	0	13495000
AT3G21865.1	peroxin 22	7.8036	5	5	0	56324000	44352000	63341000	39905000	59903000	54699000	0	37076000
AT3G22110.1	20S proteasome alpha subunit C1	153.49	11	10	676180000	653300000	612320000	712100000	677360000	744830000	729040000	661040000	625690000
AT3G22200.1;AT3G22200.2	Pyridoxal phosphate (PLP)-dependent transferases superfamily protein ; Pyridoxal phosphate (PLP)-dependent transferases superfamily protein	323.31	22;22	22;22	2619300000	2364900000	2399300000	2496200000	2480800000	2314900000	2450800000	2456500000	2278100000
AT3G22230.1	Ribosomal L27e protein family	3.6228	6;2	2;1	0	45171000	0	0	52633000	23930000	39444000	38405000	70999000
AT3G22310.1	putative mitochondrial RNA helicase 1	1.2548	2	2	0	0	0	0	44582000	0	0	0	33564000
AT3G22320.1	Eukaryotic rpb5 RNA polymerase subunit family protein	8.0574	1	1	0	0	0	0	0	0	0	19825000	0
AT3G22330.1	putative mitochondrial RNA helicase 2	2.1446	1	1	0	0	0	0	0	0	12286000	0	0
AT3G22480.2;AT3G22480.1	prefoldin 2 ; prefoldin 2	11.122	4;4	4;4	0	71268000	101210000	0	0	87872000	59857000	0	0
AT3G22600.1	Bifunctional inhibitor/lipid-transfer protein/seed storage 2S albumin superfamily protein	2.34	1	1	0	0	0	0	0	0	0	6239600	0
AT3G22845.1	emp24/gp25L/p24 family/GOLD family protein	15.848	2	2	0	69592000	39065000	59437000	52147000	0	0	0	0
AT3G22850.1	Aluminium induced protein with YGL and LRDR motifs	212.93	6	5	269020000	289610000	186840000	251310000	296500000	305250000	267400000	251390000	336790000
AT3G22890.1	ATP sulfurylase 1	126.18	11	9	486330000	288380000	419790000	325800000	326220000	321050000	412080000	354420000	357370000
AT3G22950.2;AT3G22950.1	ADP-ribosylation factor C1 ; ADP-ribosylation factor C1	4.5268	2;2	2;2	0	0	0	0	0	0	0	39107000	0
AT3G22960.1	Pyruvate kinase family protein	111.14	12	12	254310000	366900000	361150000	330840000	420740000	396170000	409420000	337420000	357740000
AT3G22980.1	Ribosomal protein S5/Elongation factor G/III/V family protein	2.8067	2	2	0	0	0	0	0	0	0	0	20120000
AT3G22990.1	ARM repeat superfamily protein	2.1354	2	2	0	0	0	0	0	0	0	0	15349000
AT4G14342.1;AT3G23325.1	Splicing factor 3B subunit 5/RDS3 complex subunit 10 ; Splicing factor 3B subunit 5/RDS3 complex subunit 10	12.784	1;1	1;1	0	0	0	0	0	0	0	0	42825000
AT4G14320.1;AT3G23390.1	Zinc-binding ribosomal protein family protein ; Zinc-binding ribosomal protein family protein	2.8468	1;1	1;1	0	0	0	0	0	6466600	0	0	0
AT3G23400.1	Plastid-lipid associated protein PAP / fibrillin family protein	1.9418	1	1	0	0	0	0	0	0	12100000	0	0
AT3G23490.1	cyanase	143.5	6	6	283720000	290650000	298560000	274280000	282720000	310410000	320830000	290130000	225930000
AT3G23570.1	alpha/beta-Hydrolases superfamily protein	12.997	6	6	91963000	108970000	102780000	101400000	96928000	97189000	129530000	112790000	118000000
AT3G23600.2;AT3G23600.1	alpha/beta-Hydrolases superfamily protein ; alpha/beta-Hydrolases superfamily protein	205.97	11;11	11;11	1638600000	2126500000	2673200000	2252400000	1804200000	2153800000	2176800000	2497900000	2395600000
AT3G23620.1	Ribosomal RNA processing Brix domain protein	3.3843	3	3	0	40633000	0	38836000	0	0	0	27291000	0
AT3G23660.1;AT3G23660.2	Sec23/Sec24 protein transport family protein ; Sec23/Sec24 protein transport family protein	5.8479	5;5	1;1	0	0	27949000	0	0	0	0	0	9931600
AT3G23810.1	S-adenosyl-l-homocysteine (SAH) hydrolase 2	191.6	23	7	644910000	636640000	925970000	579350000	866360000	784690000	605820000	636810000	528690000
AT3G23820.1	UDP-D-glucuronate 4-epimerase 6	14.313	2	2	0	49490000	0	0	0	62753000	0	27036000	17917000
AT3G23830.2;AT3G23830.1	glycine-rich RNA-binding protein 4 ; glycine-rich RNA-binding protein 4	12.043	2;2	2;2	134090000	111820000	126600000	123930000	135250000	141700000	0	118460000	104820000
AT3G23940.2;AT3G23940.1	dehydratase family ; dehydratase family	124	14;14	14;14	843400000	883420000	995090000	919900000	840680000	896610000	872860000	1004400000	906980000
AT3G23990.1	heat shock protein 60	323.31	29	18	2348700000	2417700000	2550300000	2470000000	2815400000	2463800000	2428200000	2559600000	2730500000
AT3G24020.1;AT4G13580.1	Disease resistance-responsive (dirigent-like protein) family protein ; Disease resistance-responsive (dirigent-like protein) family protein	1.9961	1;1	1;1	0	0	0	0	0	0	0	0	22645000
AT3G24160.1	putative type 1 membrane protein	2.8841	1	1	0	0	0	0	0	0	0	0	10549000
AT3G24170.3;AT3G24170.2;AT3G24170.1	glutathione-disulfide reductase ; glutathione-disulfide reductase ; glutathione-disulfide reductase	323.31	21;21;21	21;21;21	1812600000	1921700000	2235400000	2071400000	1950400000	2068300000	1866900000	1925900000	1785900000
AT3G24180.2;AT3G24180.1	Beta-glucosidase, GBA2 type family protein ; Beta-glucosidase, GBA2 type family protein	1.1777	1;1	1;1	0	0	0	0	0	0	0	0	5148500
AT3G24200.1;AT3G24200.2	FAD/NAD(P)-binding oxidoreductase family protein ; FAD/NAD(P)-binding oxidoreductase family protein	4.1541	3;3	3;3	27019000	30105000	24577000	26217000	28934000	29629000	0	30047000	27529000
AT3G24300.1	ammonium transporter 1;3	10.572	1	1	0	0	0	0	0	0	0	24081000	0
AT3G24350.1;AT3G24350.2	syntaxin of plants 32 ; syntaxin of plants 32	10.318	2;2	2;2	0	38275000	44587000	41309000	26395000	42238000	42203000	57275000	41564000
AT3G24503.1	aldehyde dehydrogenase 2C4	286.22	25	25	2447400000	2139400000	2058200000	1957100000	2109700000	2115600000	2145100000	2316600000	2098800000
AT3G24530.1	AAA-type ATPase family protein / ankyrin repeat family protein	2.1088	2	2	0	0	0	0	0	0	64290000	0	0
AT3G24550.1	proline extensin-like receptor kinase 1	6.1219	4	3	0	55044000	50465000	67658000	44040000	54591000	65572000	48045000	45138000
AT3G24830.1;AT5G48760.2;AT5G48760.1	Ribosomal protein L13 family protein ; Ribosomal protein L13 family protein ; Ribosomal protein L13 family protein	129.41	8;5;5	3;0;0	725260000	1046600000	1035600000	1083000000	1430100000	1080600000	996150000	1146300000	1219500000
AT3G25110.1	fatA acyl-ACP thioesterase	26.014	4;1	4;1	79441000	94746000	49115000	46725000	38709000	61686000	51805000	50331000	44401000
AT3G25150.1;AT3G25150.2	Nuclear transport factor 2 (NTF2) family protein with RNA binding (RRM-RBD-RNP motifs) domain ; Nuclear transport factor 2 (NTF2) family protein with RNA binding (RRM-RBD-RNP motifs) domain	6.4973	3;3	3;3	30735000	37292000	0	0	0	0	24537000	34273000	0
AT3G25220.1	FK506-binding protein 15 kD-1	125.4	4	3	246880000	353830000	399590000	322880000	428720000	499340000	388700000	323100000	267790000
AT3G25230.1;AT3G25230.2	rotamase FKBP 1 ; rotamase FKBP 1	77.29	13;13;1	13;13;1	327300000	406450000	271470000	374660000	483790000	343250000	379810000	350620000	428720000
AT3G25520.1;AT3G25520.2	ribosomal protein L5 ; ribosomal protein L5	3.3167	10;8	1;1	0	0	0	0	0	0	0	339280000	0
AT3G25530.1;AT3G25530.2	glyoxylate reductase 1 ; glyoxylate reductase 1	98.497	10;8	10;8	363220000	439060000	465340000	446390000	413860000	443970000	471130000	419050000	363620000
AT3G25540.1	TRAM, LAG1 and CLN8 (TLC) lipid-sensing domain containing protein	1.6026	1	1	0	0	0	0	0	0	0	7514000	0
AT3G25545.1	unknown protein; FUNCTIONS IN: molecular_function unknown; INVOLVED IN: biological_process unknown; LOCATED IN: cellular_component unknown; EXPRESSED IN: 23 plant structures; EXPRESSED DURING: 13 growth stages; Has 38 Blast hits to 38 proteins in 14 speci	3.6081	2	2	0	0	0	41927000	0	0	0	0	0
AT3G25700.1	Eukaryotic aspartyl protease family protein	1.135	1	1	0	0	0	0	0	0	0	0	1305500
AT3G25780.1	allene oxide cyclase 3	30.444	4	3	111570000	121560000	111130000	124470000	123390000	120630000	101820000	131210000	131830000
AT3G25800.1;AT3G25800.2	protein phosphatase 2A subunit A2 ; protein phosphatase 2A subunit A2	187.23	16;13	10;7	429990000	414010000	451540000	393990000	398640000	403490000	433660000	419080000	330030000
AT3G25830.1;AT3G25820.1;AT3G25820.2	terpene synthase-like sequence-1,8-cineole ; terpene synthase-like sequence-1,8-cineole ; terpene synthase-like sequence-1,8-cineole	58.5	13;13;12;1	13;13;12;1	468250000	451220000	348930000	343470000	315550000	299670000	371570000	331390000	477600000
AT3G25860.1	2-oxoacid dehydrogenases acyltransferase family protein	127.39	10	8	500930000	558170000	565300000	559000000	535510000	553510000	491840000	516590000	552970000
AT3G26210.1	cytochrome P450, family 71, subfamily B, polypeptide 23	6.2768	3	3	0	0	0	16853000	32544000	26695000	28979000	0	0
AT3G26290.1;AT3G26310.1	cytochrome P450, family 71, subfamily B, polypeptide 26 ; cytochrome P450, family 71, subfamily B, polypeptide 35	4.0744	2;1	1;0	0	27930000	41093000	36312000	0	31586000	34876000	41707000	31306000
AT3G26300.1	cytochrome P450, family 71, subfamily B, polypeptide 34	1.3793	2	1	0	0	0	0	0	0	0	0	4871800
AT3G26330.1	cytochrome P450, family 71, subfamily B, polypeptide 37	1.1681	1	1	0	0	0	0	0	0	0	0	2685900
AT3G26340.1	N-terminal nucleophile aminohydrolases (Ntn hydrolases) superfamily protein	3.3354	7	2	0	0	0	0	0	25204000	0	0	0
AT3G26420.1	RNA-binding (RRM/RBD/RNP motifs) family protein with retrovirus zinc finger-like domain	2.4966	1	1	0	0	0	0	0	0	0	0	17456000
AT3G26450.1	Polyketide cyclase/dehydrase and lipid transport superfamily protein	163.58	9	5	1498400000	1318300000	1127600000	1467500000	1296800000	1170700000	1354100000	1339600000	1518800000
AT3G26460.1	Polyketide cyclase/dehydrase and lipid transport superfamily protein	121.14	9	4	1625200000	1608400000	1649900000	1812700000	1389600000	1286900000	1602400000	1503700000	1905900000
AT3G26520.1	tonoplast intrinsic protein 2	277.61	2	2	1221400000	877170000	666530000	998160000	755850000	601140000	581840000	756470000	830930000
AT3G26560.1	ATP-dependent RNA helicase, putative	1.2743	1	1	0	0	0	0	0	0	0	0	11844000
AT3G26618.1	eukaryotic release factor 1-3	41.508	6	1	0	0	0	0	0	0	0	0	14307000
AT3G26720.1;AT3G26720.2	Glycosyl hydrolase family 38 protein ; Glycosyl hydrolase family 38 protein	152.85	17;16	17;16	452510000	518380000	542360000	411910000	357880000	430670000	516130000	367830000	380430000
AT3G26760.1	NAD(P)-binding Rossmann-fold superfamily protein	11.98	4	4	38017000	69285000	63846000	48436000	47612000	62626000	69012000	50594000	49726000
AT3G26770.1	NAD(P)-binding Rossmann-fold superfamily protein	1.4345	1	1	0	0	0	0	0	0	0	0	4099100
AT3G26820.1	Esterase/lipase/thioesterase family protein	2.096	1	1	0	0	0	0	0	380170000	0	312100000	0
AT3G27120.1	P-loop containing nucleoside triphosphate hydrolases superfamily protein	1.172	1	1	0	0	0	0	0	0	0	0	8977100
AT3G27190.1	uridine kinase-like 2	96.299	7;2;1;1;1;1;1	3;0;0;0;0;0;0	186150000	174260000	217880000	212400000	244280000	221750000	226580000	226590000	216680000
AT3G27200.1	Cupredoxin superfamily protein	1.9385	1	1	0	0	0	0	0	0	0	0	5773700
AT3G27240.1	Cytochrome C1 family	100.81	5	3	306910000	279560000	284230000	275770000	311170000	245780000	234820000	210510000	274290000
AT3G27280.2;AT3G27280.1	prohibitin 4 ; prohibitin 4	29.303	8;8	4;4	75577000	71651000	104830000	65332000	92811000	89594000	71648000	100800000	78903000
AT3G27300.3;AT3G27300.2;AT3G27300.1	glucose-6-phosphate dehydrogenase 5 ; glucose-6-phosphate dehydrogenase 5 ; glucose-6-phosphate dehydrogenase 5	45.722	7;7;7	7;7;7	165730000	97663000	104640000	89196000	125010000	125280000	53189000	69919000	67166000
AT3G27380.2;AT3G27380.1;AT5G40650.1	succinate dehydrogenase 2-1 ; succinate dehydrogenase 2-1 ; succinate dehydrogenase 2-2	17.155	6;6;5	6;6;5	393030000	265200000	318240000	330050000	371260000	343860000	329570000	322170000	300560000
AT3G27390.1	unknown protein; FUNCTIONS IN: molecular_function unknown; INVOLVED IN: biological_process unknown; LOCATED IN: plasma membrane; EXPRESSED IN: 23 plant structures; EXPRESSED DURING: 13 growth stages; BEST Arabidopsis thaliana protein match is: unknown pro	4.7027	2	2	0	0	0	0	0	0	5099300	0	0
AT3G27530.1	golgin candidate 6	6.4064	3	3	0	22942000	0	20905000	19053000	25662000	16630000	17777000	22208000
AT3G27570.1	Sucrase/ferredoxin-like family protein	8.8707	4	4	0	96056000	106790000	79804000	101980000	0	75630000	98909000	104250000
AT3G27740.1;AT3G27740.2	carbamoyl phosphate synthetase A ; carbamoyl phosphate synthetase A	8.9772	4;2	4;2	71469000	84851000	80202000	95566000	154070000	77093000	89403000	82342000	103570000
AT3G27820.1	monodehydroascorbate reductase 4	12.841	6	6	82403000	0	64624000	88785000	130310000	111390000	87243000	101580000	76486000
AT3G27890.1	NADPH:quinone oxidoreductase	125.69	9	9	438470000	412640000	552980000	447980000	355250000	346400000	541780000	552710000	583780000
AT3G28200.1	Peroxidase superfamily protein	6.7334	2	2	30797000	26811000	21854000	21632000	0	21135000	0	19772000	20740000
AT3G28300.1;AT3G28290.1	Protein of unknown function (DUF677) ; Protein of unknown function (DUF677)	2.1039	1;1	1;1	0	0	0	0	0	0	0	0	8289400
AT3G28450.1	Leucine-rich repeat protein kinase family protein	6.1772	5	5	146100000	133120000	150110000	109640000	117980000	136470000	122280000	133580000	0
AT3G28710.1	ATPase, V0/A0 complex, subunit C/D	7.5723	13	2	0	0	0	0	0	0	0	0	60705000
AT3G28715.1;AT3G28715.2	ATPase, V0/A0 complex, subunit C/D ; ATPase, V0/A0 complex, subunit C/D	166.31	13;10	2;1	1010400000	889850000	891910000	990230000	1073800000	1069400000	760100000	926320000	733800000
AT3G28720.1	unknown protein; FUNCTIONS IN: molecular_function unknown; INVOLVED IN: biological_process unknown; LOCATED IN: cellular_component unknown; EXPRESSED IN: 25 plant structures; EXPRESSED DURING: 13 growth stages; BEST Arabidopsis thaliana protein match is:	4.0074	2	2	0	0	0	0	6737100	0	0	0	0
AT3G28900.1	Ribosomal protein L34e superfamily protein	5.5759	3	2	77825000	65209000	47471000	59720000	78365000	60246000	71156000	69951000	78023000
AT3G28940.1	AIG2-like (avirulence induced gene) family protein	323.31	7	7	1820600000	1450500000	1783700000	1704800000	1348300000	1710700000	1601300000	1780900000	1662900000
AT3G28950.1	AIG2-like (avirulence induced gene) family protein	33.818	4	4	51061000	60375000	74916000	72455000	51261000	83003000	79573000	67416000	68859000
AT3G29200.1	chorismate mutase 1	6.0312	2	2	0	0	0	0	32504000	37606000	0	0	32710000
AT3G29250.2;AT3G29250.1	NAD(P)-binding Rossmann-fold superfamily protein ; NAD(P)-binding Rossmann-fold superfamily protein	102.79	7;7	6;6	1045400000	962860000	712250000	814540000	751440000	717980000	753730000	870390000	1037400000
AT3G29320.1	Glycosyl transferase, family 35	6.8125	3	3	0	15254000	0	42587000	52908000	0	33422000	0	0
AT3G29350.2;AT3G29350.1	histidine-containing phosphotransmitter 2 ; histidine-containing phosphotransmitter 2	88.295	4;4	4;4	122170000	115390000	102270000	72920000	76375000	82798000	111000000	93439000	104770000
AT3G29360.2;AT3G29360.1	UDP-glucose 6-dehydrogenase family protein ; UDP-glucose 6-dehydrogenase family protein	31.118	20;20;1	7;7;0	409810000	248140000	307180000	262200000	312870000	307420000	261790000	266430000	325890000
AT3G29410.1	Terpenoid cyclases/Protein prenyltransferases superfamily protein	13.939	2	2	0	0	0	0	0	0	0	12885000	0
AT3G30280.1	HXXXD-type acyl-transferase family protein	3.2542	2	1	0	0	0	0	0	0	0	0	37739000
AT3G32030.1	Terpenoid cyclases/Protein prenyltransferases superfamily protein	8.3853	4	4	25669000	53714000	0	0	45815000	55910000	42360000	0	0
AT3G32980.1	Peroxidase superfamily protein	323.31	13	9	12836000000	9951100000	10233000000	8407200000	8201300000	9101100000	8670300000	7581900000	8106900000
AT3G42050.1	vacuolar ATP synthase subunit H family protein	270.89	12	12	603730000	524930000	607710000	520380000	622800000	664710000	484110000	492780000	418900000
AT3G42170.1	BED zinc finger ;hAT family dimerisation domain	80.699	8	8	198240000	224850000	272150000	229840000	183880000	238690000	214520000	186910000	175730000
AT3G42790.1	alfin-like 3	3.2756	1	1	0	0	0	0	0	0	0	5532500	0
AT3G43300.2;AT3G43300.1	HOPM interactor 7 ; HOPM interactor 7	132.14	29;28	29;28	415670000	509530000	580580000	495780000	509400000	525970000	570710000	507610000	537740000
AT3G43520.1	Transmembrane proteins 14C	3.3488	1	1	0	0	0	0	0	0	0	0	32388000
AT3G43600.1	aldehyde oxidase 2	21.372	8;1;1	8;1;1	0	50791000	50143000	58089000	59140000	64499000	70510000	78842000	45561000
AT3G43800.1	glutathione S-transferase tau 27	40.108	4	4	66107000	105380000	98506000	81886000	85574000	93560000	109630000	123690000	116220000
AT3G44100.1	MD-2-related lipid recognition domain-containing protein	7.6807	3	3	239730000	245460000	165330000	199640000	174960000	203450000	301860000	301230000	286220000
AT3G44110.1;AT3G44110.2	DNAJ homologue 3 ; DNAJ homologue 3	116.76	10;7	7;4	303970000	293530000	199440000	269340000	269870000	257080000	301940000	287560000	409850000
AT3G44190.1	FAD/NAD(P)-binding oxidoreductase family protein	32.131	8	7	186960000	306090000	207640000	329660000	242750000	266150000	327860000	308400000	319380000
AT3G44300.1	nitrilase 2	161.68	9	5	607300000	614360000	710570000	705560000	518470000	601020000	748830000	978370000	713540000
AT3G44310.3;AT3G44310.1	nitrilase 1 ; nitrilase 1	201.26	11;11;5	8;8;3	1076100000	1143000000	1106700000	1018000000	823020000	962530000	971310000	1138900000	1105200000
AT3G44320.1	nitrilase 3	323.31	14	10	1189600000	1110300000	1019300000	1174200000	1063300000	1121100000	1286100000	1437400000	1344700000
AT3G44330.1	INVOLVED IN: protein processing; LOCATED IN: mitochondrion, endoplasmic reticulum, plasma membrane, vacuole; EXPRESSED IN: 25 plant structures; EXPRESSED DURING: 13 growth stages; CONTAINS InterPro DOMAIN/s: Nicalin (InterPro:IPR016574), EF-Hand 1, calciu	76.173	10	10	171260000	236600000	183000000	273030000	237110000	265780000	163410000	251570000	179680000
AT3G44340.1;AT3G44340.2	clone eighty-four ; clone eighty-four	27.567	7;6	6;5	106050000	83857000	141990000	92041000	74020000	73432000	95933000	118190000	94260000
AT3G44590.2;AT3G44590.1	60S acidic ribosomal protein family ; 60S acidic ribosomal protein family	47.557	5;5	5;5	139790000	194090000	174770000	177730000	158160000	220120000	194840000	229250000	202790000
AT3G44600.1	cyclophilin71	11.508	2	2	17800000	16555000	15635000	0	17495000	19463000	0	0	21832000
AT3G44750.2;AT3G44750.1	histone deacetylase 3 ; histone deacetylase 3	77.932	3;3	3;3	0	182920000	213700000	211100000	231140000	216790000	150370000	165700000	135530000
AT3G44990.1	xyloglucan endo-transglycosylase-related 8	4.2047	1	1	0	0	0	0	0	0	0	0	16303000
AT3G45010.1	serine carboxypeptidase-like 48	39.879	7	7	185030000	154620000	153870000	175460000	164380000	155750000	129640000	178340000	172700000
AT3G47370.3;AT3G47370.2;AT3G47370.1;AT5G62300.2;AT5G62300.1;AT3G45030.1	Ribosomal protein S10p/S20e family protein ; Ribosomal protein S10p/S20e family protein ; Ribosomal protein S10p/S20e family protein ; Ribosomal protein S10p/S20e family protein ; Ribosomal protein S10p/S20e family protein ; Ribosomal protein S10p/S20e fa	46.332	5;5;5;5;5;5	5;5;5;5;5;5	1293200000	994180000	1138200000	1262400000	1231900000	947000000	1202300000	1368300000	1499300000
AT3G45070.1;AT2G27570.1;AT3G45080.1	P-loop containing nucleoside triphosphate hydrolases superfamily protein ; P-loop containing nucleoside triphosphate hydrolases superfamily protein ; P-loop containing nucleoside triphosphate hydrolases superfamily protein	1.9732	2;1;1	2;1;1	0	0	0	0	0	0	0	0	3604400
AT5G42300.1;AT3G45180.1	ubiquitin-like protein 5 ; Ubiquitin-like superfamily protein	2.61	2;2	2;2	0	0	0	715050000	0	0	0	0	0
AT3G45190.1	SIT4 phosphatase-associated family protein	3.5387	3;1	2;0	0	0	0	30582000	0	0	42517000	42559000	0
AT3G45300.1	isovaleryl-CoA-dehydrogenase	47.912	8	8	145510000	134300000	163810000	129920000	103480000	128170000	139270000	129970000	127000000
AT3G45310.2;AT3G45310.1	Cysteine proteinases superfamily protein ; Cysteine proteinases superfamily protein	105.29	4;4	3;3	143800000	192340000	300520000	194700000	125790000	177910000	105080000	165020000	105050000
AT3G45640.1	mitogen-activated protein kinase 3	30.503	3	2	26198000	0	0	0	27175000	29537000	0	28408000	32434000
AT3G46000.1	actin depolymerizing factor 2	44.144	4	3	379360000	281950000	448410000	346560000	294960000	436960000	283550000	303340000	237090000
AT3G46060.3;AT3G46060.2;AT3G46060.1;AT3G09900.1	RAB GTPase homolog 8A ; RAB GTPase homolog 8A ; RAB GTPase homolog 8A ; RAB GTPase homolog E1E	5.6552	3;3;3;2	1;1;1;0	0	0	0	0	0	0	0	66065000	0
AT3G46220.3;AT3G46220.1;AT3G46220.2	unknown protein; INVOLVED IN: biological_process unknown; EXPRESSED IN: 24 plant structures; EXPRESSED DURING: 13 growth stages; CONTAINS InterPro DOMAIN/s: Protein of unknown function DUF2042 (InterPro:IPR018611). ; unknown protein; CONTAINS InterPro DOM	6.2586	4;4;4	4;4;4	40841000	0	0	0	31697000	0	0	0	0
AT3G46280.1	protein kinase-related	3.3094	1	1	0	0	0	0	0	0	0	0	12926000
AT5G59613.2;AT5G59613.1;AT3G46430.1	unknown protein; FUNCTIONS IN: molecular_function unknown; INVOLVED IN: biological_process unknown; LOCATED IN: mitochondrial respiratory chain complex III; BEST Arabidopsis thaliana protein match is: unknown protein (TAIR:AT3G46430.1). ; unknown protein;	11.09	3;3;3	3;3;3	153810000	99691000	152080000	149090000	118610000	107270000	116350000	136460000	191560000
AT3G46440.2;AT3G46440.1	UDP-XYL synthase 5 ; UDP-XYL synthase 5	239.83	13;13	4;4	1981400000	1718100000	2127500000	1898400000	1811200000	2068700000	1728000000	1647700000	1712600000
AT3G46510.1	plant U-box 13	8.1595	3	3	14497000	18504000	16325000	18340000	15995000	0	0	16336000	15244000
AT5G59370.2;AT5G59370.1;AT3G46520.1	actin 4 ; actin 4 ; actin-12	2.5411	9;9;9	0;0;0	0	0	0	0	0	0	0	0	25501000
AT3G46560.1	Tim10/DDP family zinc finger protein	15.272	3	3	0	0	0	0	0	0	0	0	68585000
AT3G46740.1	translocon at the outer envelope membrane of chloroplasts 75-III	30.508	8	8	170930000	215780000	178190000	211590000	184740000	223900000	175980000	209970000	188240000
AT3G46830.1;AT1G07410.1	RAB GTPase homolog A2C ; RAB GTPase homolog A2B	18.293	6;4	2;0	67077000	70446000	75309000	65615000	69572000	93835000	38375000	64275000	55893000
AT3G46940.1	DUTP-PYROPHOSPHATASE-LIKE 1	3.7846	1	1	0	0	0	0	0	0	0	0	13093000
AT3G47000.1;AT3G47050.2;AT3G47050.1	Glycosyl hydrolase family protein ; Glycosyl hydrolase family protein ; Glycosyl hydrolase family protein	2.8654	3;2;2;1;1	1;0;0;1;1	0	0	0	0	0	0	0	0	12843000
AT3G47200.2;AT3G47200.1	Plant protein of unknown function (DUF247) ; Plant protein of unknown function (DUF247)	1.1434	1;1	1;1	0	0	0	0	0	0	0	0	8521500
AT3G47520.1	malate dehydrogenase	323.31	20	19	3201500000	3160800000	3774600000	3175200000	3065000000	2834300000	3385700000	3599500000	3210600000
AT3G47590.1	alpha/beta-Hydrolases superfamily protein	23.685	4;1	4;1	69144000	0	71798000	74291000	55529000	67570000	80658000	84664000	66964000
AT3G47800.1	Galactose mutarotase-like superfamily protein	2.1262	1	1	5234900	5142900	0	5095000	4681500	0	5652900	4300900	6215000
AT3G47810.3;AT3G47810.2;AT3G47810.1	Calcineurin-like metallo-phosphoesterase superfamily protein ; Calcineurin-like metallo-phosphoesterase superfamily protein ; Calcineurin-like metallo-phosphoesterase superfamily protein	6.668	3;3;3	3;3;3	72732000	92184000	71087000	74151000	60547000	69350000	81524000	89783000	122000000
AT3G47833.1	unknown protein; BEST Arabidopsis thaliana protein match is: unknown protein (TAIR:AT5G62575.2); Has 42 Blast hits to 42 proteins in 12 species: Archae - 0; Bacteria - 0; Metazoa - 0; Fungi - 0; Plants - 42; Viruses - 0; Other Eukaryotes - 0 (source: NCBI	12.526	2	2	66049000	99551000	47936000	96521000	72990000	84440000	86004000	0	109940000
AT3G47930.2;AT3G47930.1	L-galactono-1,4-lactone dehydrogenase ; L-galactono-1,4-lactone dehydrogenase	3.1402	2;2	2;2	0	0	0	0	0	0	33298000	31588000	49995000
AT3G48000.1	aldehyde dehydrogenase 2B4	290.37	15	14	984780000	1006900000	1017500000	978550000	842000000	893210000	1067100000	1014700000	1235200000
AT3G48090.2;AT3G48090.1	alpha/beta-Hydrolases superfamily protein ; alpha/beta-Hydrolases superfamily protein	3.4347	2;2	2;2	0	0	0	0	0	0	0	0	8334900
AT3G48170.1	aldehyde dehydrogenase 10A9	253.32	14	13	598870000	594240000	570770000	635320000	580010000	638680000	575760000	656960000	510790000
AT3G48190.1	ataxia-telangiectasia mutated	1.7704	2	2	0	0	54402000	41581000	40452000	42473000	39994000	0	0
AT3G48330.2;AT3G48330.1	protein-l-isoaspartate methyltransferase 1 ; protein-l-isoaspartate methyltransferase 1	6.2092	2;2	2;2	0	0	0	0	0	0	0	0	43355000
AT3G48340.1	Cysteine proteinases superfamily protein	37.466	6	5	383040000	315910000	358740000	374640000	345020000	380890000	290480000	309840000	332910000
AT3G48380.2;AT3G48380.1;AT3G48380.3	Peptidase C78, ubiquitin fold modifier-specific peptidase 1/ 2 ; Peptidase C78, ubiquitin fold modifier-specific peptidase 1/ 2 ; Peptidase C78, ubiquitin fold modifier-specific peptidase 1/ 2	2.0583	1;1;1	1;1;1	0	0	0	0	0	0	0	0	1490800
AT3G48530.1	SNF1-related protein kinase regulatory subunit gamma 1	28.433	9	9	153600000	163170000	164720000	142310000	133050000	159750000	140170000	145090000	95741000
AT3G48560.1	chlorsulfuron/imidazolinone resistant 1	16.849	8	8	79301000	121160000	140550000	128400000	132120000	115160000	147160000	119030000	148140000
AT3G48590.1;AT5G63470.2;AT5G63470.1	nuclear factor Y, subunit C1 ; nuclear factor Y, subunit C4 ; nuclear factor Y, subunit C4	1.8538	1;1;1	1;1;1	0	0	0	0	0	0	0	0	8313800
AT3G48680.1	gamma carbonic anhydrase-like 2	4.2959	5	1	0	0	0	0	0	0	0	0	2704900
AT3G48690.1	alpha/beta-Hydrolases superfamily protein	36.971	6;1	6;1	337190000	354670000	438240000	365360000	346710000	422690000	416350000	448480000	416020000
AT3G48730.1	glutamate-1-semialdehyde 2,1-aminomutase 2	2.1992	5	1	0	0	0	0	0	0	0	0	15391000
AT3G48870.2;AT3G48870.1	Clp ATPase ; Clp ATPase	9.6947	22;22	6;6	86948000	93346000	81184000	68913000	67801000	84764000	88805000	78806000	91013000
AT3G48890.1	membrane-associated progesterone binding protein 3	192.48	3	2	0	65791000	34497000	0	77943000	42581000	0	0	0
AT3G48930.1	Nucleic acid-binding, OB-fold-like protein	40.776	9	5	585770000	486260000	334110000	421770000	499010000	421650000	553120000	467390000	667550000
AT3G48990.1	AMP-dependent synthetase and ligase family protein	174.81	13	13	1932400000	1653300000	1749400000	1948200000	1669400000	1468100000	1993700000	2101600000	2314000000
AT3G49010.4;AT3G49010.3;AT3G49010.2;AT3G49010.1;AT3G49010.5	breast basic conserved 1 ; breast basic conserved 1 ; breast basic conserved 1 ; breast basic conserved 1 ; breast basic conserved 1	65.797	8;8;8;8;4	5;5;5;5;1	907050000	700480000	616620000	821020000	889580000	694120000	887940000	829330000	1183200000
AT3G49100.1	Signal recognition particle, SRP9/SRP14 subunit	6.5943	2	2	0	26420000	34457000	29656000	33215000	44171000	29590000	30166000	27016000
AT3G49120.1	peroxidase CB	323.31	13	9	2569800000	2495400000	2853300000	2075600000	1461700000	2601300000	1893400000	1766900000	1356300000
AT3G49430.2;AT3G49430.3;AT3G49430.1	SER/ARG-rich protein 34A ; SER/ARG-rich protein 34A ; SER/ARG-rich protein 34A	8.5372	4;4;4	4;4;4	128930000	110390000	138950000	137510000	142990000	128380000	156830000	143290000	144900000
AT3G49470.1	nascent polypeptide-associated complex subunit alpha-like protein 2	6.2215	3	3	0	0	0	0	0	0	56139000	70265000	58049000
AT3G49680.2;AT3G49680.1	branched-chain aminotransferase 3 ; branched-chain aminotransferase 3	52.941	6;6	4;4	149840000	155790000	162270000	143900000	181090000	189760000	152270000	155130000	136420000
AT3G49720.2;AT3G49720.1	unknown protein; FUNCTIONS IN: molecular_function unknown; INVOLVED IN: biological_process unknown; LOCATED IN: chloroplast thylakoid membrane, Golgi apparatus, plasma membrane, membrane; EXPRESSED IN: 25 plant structures; EXPRESSED DURING: 15 growth stag	69.35	5;5	5;5	139140000	153200000	114410000	123170000	178880000	175970000	111040000	112270000	116950000
AT3G49870.1;AT5G67560.1	ADP-ribosylation factor-like A1C ; ADP-ribosylation factor-like A1D	7.6462	3;2	3;2	44049000	0	0	0	0	0	40345000	36757000	43258000
AT3G49910.1	Translation protein SH3-like family protein	11.278	5	4	354020000	348840000	264680000	415720000	424220000	372030000	427300000	392020000	484800000
AT3G50360.1	centrin2	3.2201	1	1	0	0	0	0	0	0	0	30896000	0
AT3G50590.1	Transducin/WD40 repeat-like superfamily protein	13.6	12	12	75903000	89695000	81913000	84843000	81777000	80856000	122420000	103590000	126220000
AT3G50670.1	U1 small nuclear ribonucleoprotein-70K	2.9033	2	2	0	6661400	4841400	5000900	6496200	5389200	5722300	0	7275600
AT3G50740.1	UDP-glucosyl transferase 72E1	1.864	2	2	17626000	19005000	22869000	32985000	21948000	21450000	25542000	27195000	21162000
AT3G50970.1	dehydrin family protein	1.1287	3	3	8102100	7087000	4995500	6149300	6898200	5016700	13689000	5505700	24597000
AT3G51000.1	alpha/beta-Hydrolases superfamily protein	14.781	4	4	155540000	163790000	227780000	201790000	169290000	183260000	138270000	156390000	71271000
AT3G51050.1	FG-GAP repeat-containing protein	7.821	1	1	0	0	0	0	0	0	0	0	5317300
AT3G51160.1	NAD(P)-binding Rossmann-fold superfamily protein	71.303	11	7	718040000	730190000	591220000	684850000	632630000	618820000	693250000	628950000	877600000
AT3G51240.1;AT3G51240.2	flavanone 3-hydroxylase ; flavanone 3-hydroxylase	112.4	6;5	6;5	198770000	160320000	303460000	163010000	259200000	277010000	188240000	285760000	227090000
AT3G51260.1;AT3G51260.2	20S proteasome alpha subunit PAD1 ; 20S proteasome alpha subunit PAD1	264.14	11;10	4;3	1624400000	1820700000	2122700000	1998300000	1757000000	1751600000	1657900000	1810200000	1592200000
AT3G51330.1	Eukaryotic aspartyl protease family protein	60.477	1	1	0	0	0	0	0	0	9361500	0	0
AT3G51350.1	Eukaryotic aspartyl protease family protein	1.648	1	1	0	0	0	0	0	0	0	0	7017500
AT3G51460.1	Phosphoinositide phosphatase family protein	38.88	7;2	7;2	173990000	138470000	177020000	166690000	132740000	125370000	131500000	143080000	108190000
AT3G51730.1	saposin B domain-containing protein	27.679	4	4	100900000	100370000	91459000	105910000	80822000	115750000	82210000	125380000	83228000
AT3G51780.1	BCL-2-associated athanogene 4	1.4566	1	1	0	0	0	0	0	0	0	0	12925000
AT3G51800.3;AT3G51800.1;AT3G51800.2	metallopeptidase M24 family protein ; metallopeptidase M24 family protein ; metallopeptidase M24 family protein	149.84	12;12;11	12;12;11	1089700000	1175400000	924840000	1142500000	1128300000	992120000	1170600000	1191600000	1235700000
AT3G51840.1	acyl-CoA oxidase 4	43.399	8	8	167900000	155420000	199190000	145210000	132790000	176220000	186220000	137040000	144470000
AT3G51880.4;AT3G51880.3;AT3G51880.1;AT3G51880.2	high mobility group B1 ; high mobility group B1 ; high mobility group B1 ; high mobility group B1	1.4056	1;1;1;1	1;1;1;1	0	0	0	0	0	0	0	0	6634800
AT3G52090.1;AT3G52090.2	DNA-directed RNA polymerase, RBP11-like ; DNA-directed RNA polymerase, RBP11-like	1.2966	1;1	1;1	0	0	0	0	0	0	0	0	38097000
AT3G52115.1	gamma response gene 1	1.5577	1	1	0	0	0	0	0	0	0	0	17242000
AT3G52140.3;AT3G52140.1;AT3G52140.2;AT3G52140.4	tetratricopeptide repeat (TPR)-containing protein ; tetratricopeptide repeat (TPR)-containing protein ; tetratricopeptide repeat (TPR)-containing protein ; tetratricopeptide repeat (TPR)-containing protein	159.9	12;12;12;12	12;12;12;12	242310000	285390000	342980000	268450000	302130000	313530000	209270000	227820000	261960000
AT3G52200.1;AT3G52200.2	Dihydrolipoamide acetyltransferase, long form protein ; Dihydrolipoamide acetyltransferase, long form protein	39.641	13;13	13;13	331930000	375640000	432100000	411040000	453050000	485010000	354680000	435130000	372770000
AT3G52300.1;AT3G52300.2	ATP synthase D chain, mitochondrial ; ATP synthase D chain, mitochondrial	98.197	9;6	9;6	683700000	676480000	373110000	664630000	784690000	784910000	651410000	646600000	845270000
AT3G52390.1;AT3G52390.2	TatD related DNase ; TatD related DNase	4.5872	2;2	2;2	0	0	0	0	0	0	0	0	22492000
AT3G52400.1	syntaxin of plants 122	7.8626	2	2	0	0	0	0	37345000	45706000	0	28132000	0
AT3G52500.1	Eukaryotic aspartyl protease family protein	37.381	6	6	340070000	301400000	410660000	295480000	311220000	322930000	264780000	311420000	232590000
AT3G52560.1;AT3G52560.4	ubiquitin E2 variant 1D-4 ; ubiquitin E2 variant 1D-4	4.9059	6;5	0;0	0	0	0	0	0	0	0	0	51807000
AT3G52560.2;AT3G52560.3	ubiquitin E2 variant 1D-4 ; ubiquitin E2 variant 1D-4	26.089	6;4	0;0	220800000	124570000	176870000	182380000	167460000	165340000	198290000	177360000	244510000
AT3G52580.1	Ribosomal protein S11 family protein	5.2092	6	2	0	37624000	28460000	56765000	46761000	32505000	42574000	48640000	52972000
AT3G52640.3;AT3G52640.1;AT3G52640.2	Zn-dependent exopeptidases superfamily protein ; Zn-dependent exopeptidases superfamily protein ; Zn-dependent exopeptidases superfamily protein	6.3264	2;2;2	2;2;2	0	12499000	0	15484000	11787000	12027000	11081000	9055100	0
AT3G52850.1	vacuolar sorting receptor homolog 1	1.9975	2	1	0	0	0	0	0	0	0	0	21573000
AT3G52880.1;AT3G52880.2	monodehydroascorbate reductase 1 ; monodehydroascorbate reductase 1	196.06	16;16	16;16	979240000	845370000	803490000	941720000	865090000	941010000	923360000	907980000	1053000000
AT3G52930.1	Aldolase superfamily protein	323.31	24;1	13;0	25577000000	24244000000	19793000000	23190000000	22962000000	27330000000	23222000000	24496000000	25958000000
AT3G52950.2;AT3G52950.1	CBS / octicosapeptide/Phox/Bemp1 (PB1) domains-containing protein ; CBS / octicosapeptide/Phox/Bemp1 (PB1) domains-containing protein	2.2295	1;1	1;1	0	0	0	0	0	0	0	0	0
AT3G52960.1	Thioredoxin superfamily protein	192.13	10	10	570930000	478290000	465540000	559500000	494560000	514220000	501050000	558940000	500180000
AT3G52990.1;AT3G52990.2	Pyruvate kinase family protein ; Pyruvate kinase family protein	113.17	18;16	7;6	560730000	537040000	599930000	555570000	732520000	805950000	547290000	488140000	582060000
AT3G53020.1	Ribosomal protein L24e family protein	32.562	5	2	722480000	830020000	1051600000	849280000	1179400000	1159400000	1010700000	871520000	668080000
AT3G53030.1	ser/arg-rich protein kinase 4	-2	1	1	0	0	0	0	0	0	0	0	0
AT3G53110.1	P-loop containing nucleoside triphosphate hydrolases superfamily protein	202.81	12	12	525050000	527460000	690090000	617550000	617580000	578650000	646010000	628970000	712540000
AT3G53180.1	glutamate-ammonia ligases;catalytics;glutamate-ammonia ligases	162.07	12	12	396290000	429300000	493050000	481720000	435110000	453820000	438980000	456630000	346620000
AT3G53230.1	ATPase, AAA-type, CDC48 protein	9.6701	32	3	40069000	28279000	0	0	29271000	0	37262000	0	0
AT3G53260.1	phenylalanine ammonia-lyase 2	45.306	19;2;2	12;0;0	184900000	193050000	226500000	166330000	190490000	181110000	187540000	166350000	195190000
AT3G53340.1	nuclear factor Y, subunit B10	2.1582	1	1	0	0	0	0	0	0	0	0	1393000
AT3G53420.2;AT3G53420.1	plasma membrane intrinsic protein 2A ; plasma membrane intrinsic protein 2A	13.634	3;3	1;1	489050000	656060000	338580000	172240000	0	0	464720000	566950000	0
AT3G53430.1;AT2G37190.1;AT5G60670.1	Ribosomal protein L11 family protein ; Ribosomal protein L11 family protein ; Ribosomal protein L11 family protein	64.843	6;5;4	6;5;4	1368100000	1330900000	1507100000	1368200000	1721800000	1388200000	1550400000	1528000000	1550800000
AT3G53460.3;AT3G53460.2;AT3G53460.1;AT3G53460.4	chloroplast RNA-binding protein 29 ; chloroplast RNA-binding protein 29 ; chloroplast RNA-binding protein 29 ; chloroplast RNA-binding protein 29	2.5144	1;1;1;1	1;1;1;1	0	0	0	0	0	0	0	0	9166900
AT3G53480.1;AT2G37280.1	pleiotropic drug resistance 9 ; pleiotropic drug resistance 5	3.5756	4;2	4;2	0	16678000	0	0	0	19087000	0	11361000	0
AT3G53520.3;AT3G53520.2;AT3G53520.1;AT3G53520.4	UDP-glucuronic acid decarboxylase 1 ; UDP-glucuronic acid decarboxylase 1 ; UDP-glucuronic acid decarboxylase 1 ; UDP-glucuronic acid decarboxylase 1	11.061	6;6;6;6	4;4;4;4	64670000	82714000	89257000	87528000	88749000	81952000	68321000	101520000	106300000
AT3G53580.1	diaminopimelate epimerase family protein	28.059	4	4	147450000	124370000	115000000	143800000	67530000	131370000	147390000	120790000	150140000
AT3G53620.1	pyrophosphorylase 4	2.9254	4	3	0	0	0	0	49991000	0	0	0	0
AT3G53710.2;AT3G53710.1	ARF-GAP domain 6 ; ARF-GAP domain 6	7.3948	1;1	1;1	0	0	0	0	0	0	0	0	37747000
AT3G53740.1;AT3G53740.4;AT3G53740.3;AT3G53740.2;AT2G37600.2;AT2G37600.1	Ribosomal protein L36e family protein ; Ribosomal protein L36e family protein ; Ribosomal protein L36e family protein ; Ribosomal protein L36e family protein ; Ribosomal protein L36e family protein ; Ribosomal protein L36e family protein	1.5484	4;4;4;4;3;3	1;1;1;1;1;1	0	0	0	0	0	0	0	0	66189000
AT3G53870.1	Ribosomal protein S3 family protein	65.542	16	3	1425900000	1637800000	1486900000	1817500000	2242100000	1401800000	1623400000	1794500000	1832100000
AT3G53880.1	NAD(P)-linked oxidoreductase superfamily protein	6.33	2	2	0	0	0	0	0	0	0	0	9210300
AT3G53890.2;AT3G53890.1	Ribosomal protein S21e ; Ribosomal protein S21e	86.965	4;4	2;2	263040000	256590000	279510000	224450000	278330000	231630000	268640000	173410000	294080000
AT3G53900.1;AT3G53900.2	uracil phosphoribosyltransferase ; uracil phosphoribosyltransferase	3.3264	1;1	1;1	7797800	13489000	12408000	0	18814000	18935000	21896000	12500000	10573000
AT3G53970.2;AT3G53970.1	proteasome inhibitor-related ; proteasome inhibitor-related	25.934	2;2	2;2	214520000	195420000	188530000	216460000	161760000	176250000	267620000	227870000	153200000
AT3G53990.1;AT3G53990.2	Adenine nucleotide alpha hydrolases-like superfamily protein ; Adenine nucleotide alpha hydrolases-like superfamily protein	132.34	8;5	8;5	597440000	651420000	651410000	658500000	642220000	593490000	597140000	567340000	609830000
AT3G54110.1	plant uncoupling mitochondrial protein 1	36.453	6	6	228050000	188600000	183420000	220420000	223060000	241550000	186170000	178590000	189290000
AT3G54130.1	Josephin family protein	2.2346	1	1	0	0	0	0	0	0	0	0	12281000
AT3G54170.1	FKBP12 interacting protein 37	1.3719	2	2	0	0	0	0	0	0	15897000	0	0
AT3G54200.1	Late embryogenesis abundant (LEA) hydroxyproline-rich glycoprotein family	4.2275	1	1	21355000	0	0	0	0	0	5781000	0	4517000
AT3G54250.1	GHMP kinase family protein	1.8123	5	1	0	0	0	0	0	0	0	24029000	0
AT3G54400.1	Eukaryotic aspartyl protease family protein	63.741	7	7	136890000	128950000	94843000	104200000	89948000	95677000	97042000	100440000	109340000
AT3G54440.1;AT3G54440.3;AT3G54440.2	glycoside hydrolase family 2 protein ; glycoside hydrolase family 2 protein ; glycoside hydrolase family 2 protein	6.7083	5;5;4	5;5;4	41783000	22875000	45912000	35384000	29842000	30358000	36938000	46715000	19307000
AT3G54470.1	uridine 5-monophosphate synthase / UMP synthase (PYRE-F) (UMPS)	323.31	16;1	16;1	703610000	756710000	1100100000	817690000	840440000	912790000	852770000	840050000	644730000
AT3G54540.1	general control non-repressible 4	38.354	9	9	242830000	291080000	345670000	319220000	315320000	281320000	385910000	295210000	346320000
AT3G54640.1	tryptophan synthase alpha chain	210.17	8	7	531140000	437320000	511720000	419830000	393130000	469590000	555630000	634090000	578860000
AT3G54660.1	glutathione reductase	55.943	7	7	119840000	165970000	203410000	197900000	188020000	166950000	180740000	200690000	148690000
AT3G54760.2;AT3G54760.1	dentin sialophosphoprotein-related ; dentin sialophosphoprotein-related	17.965	3;3	3;3	46209000	31961000	30304000	35281000	42782000	30676000	42831000	30567000	67795000
AT3G54840.2;AT3G54840.1	Ras-related small GTP-binding family protein ; Ras-related small GTP-binding family protein	2.3543	1;1	1;1	0	0	0	0	0	0	0	0	32879000
AT3G54860.1;AT3G54860.2	Sec1/munc18-like (SM) proteins superfamily ; Sec1/munc18-like (SM) proteins superfamily	14.782	5;5	5;5	0	0	66461000	0	0	0	0	0	0
AT3G54900.1	CAX interacting protein 1	15.434	1	1	0	0	0	0	0	0	0	19902000	0
AT3G54960.1;AT3G54960.2	PDI-like 1-3 ; PDI-like 1-3	323.31	20;16	20;16	774860000	861730000	940950000	843170000	939810000	955790000	767720000	846720000	822740000
AT3G55005.1	tonneau 1b (TON1b)	1.8687	1	1	0	0	0	0	0	0	0	0	4684800
AT3G55010.2;AT3G55010.1	phosphoribosylformylglycinamidine cyclo-ligase, chloroplast / phosphoribosyl-aminoimidazole synthetase / AIR synthase (PUR5) ; phosphoribosylformylglycinamidine cyclo-ligase, chloroplast / phosphoribosyl-aminoimidazole synthetase / AIR synthase (PUR5)	53.209	5;5	5;5	194880000	185270000	263710000	278190000	204060000	183910000	193510000	225490000	214020000
AT3G55020.1	Ypt/Rab-GAP domain of gyp1p superfamily protein	2.8666	2	2	0	0	0	23693000	18532000	19591000	23878000	0	0
AT3G55120.1	Chalcone-flavanone isomerase family protein	39.841	8	8	254660000	139500000	198820000	140540000	213120000	193880000	204160000	190150000	162470000
AT3G55220.1;AT3G55200.1	Cleavage and polyadenylation specificity factor (CPSF) A subunit protein ; Cleavage and polyadenylation specificity factor (CPSF) A subunit protein	28.383	11;11	11;11	204490000	192530000	218900000	212500000	198960000	230840000	177940000	248270000	170130000
AT3G55260.1	beta-hexosaminidase 1	10.807	3	3	0	0	0	0	77993000	0	0	0	0
AT3G55360.1	3-oxo-5-alpha-steroid 4-dehydrogenase family protein	13.562	1	1	0	0	0	0	0	0	0	0	46828000
AT3G55410.1	2-oxoglutarate dehydrogenase, E1 component	323.31	30	20	1440300000	1533200000	1510500000	1452900000	1375200000	1616400000	1537900000	1609100000	1633500000
AT3G55440.1	triosephosphate isomerase	317.82	17	16	7705500000	8405300000	8761800000	8405800000	8516500000	8356100000	8697000000	8960700000	9039700000
AT3G55460.1	SC35-like splicing factor 30	3.0836	1	1	37080000	35653000	48531000	44246000	32351000	36346000	43361000	41372000	47725000
AT3G55470.2;AT3G55470.1	Calcium-dependent lipid-binding (CaLB domain) family protein ; Calcium-dependent lipid-binding (CaLB domain) family protein	2.4175	1;1	1;1	0	0	0	0	0	0	0	17483000	0
AT3G55610.1;AT3G55610.2	delta 1-pyrroline-5-carboxylate synthase 2 ; delta 1-pyrroline-5-carboxylate synthase 2	21.203	7;6	4;4	0	76241000	64709000	63893000	75145000	90960000	75062000	69806000	75991000
AT3G55620.1	Translation initiation factor IF6	68.002	4	4	163320000	181360000	189080000	202230000	161610000	221330000	150340000	169540000	151700000
AT3G56070.2;AT3G56070.1	rotamase cyclophilin 2 ; rotamase cyclophilin 2	20.214	9;9	8;8	662110000	622570000	595460000	494310000	585650000	577820000	605260000	569040000	574350000
AT3G56090.1	ferritin 3	9.1113	5	4	97145000	75576000	76568000	100270000	69325000	87769000	64053000	74022000	100240000
AT3G56130.1;AT3G56130.4;AT3G56130.3;AT3G56130.2	biotin/lipoyl attachment domain-containing protein ; biotin/lipoyl attachment domain-containing protein ; biotin/lipoyl attachment domain-containing protein ; biotin/lipoyl attachment domain-containing protein	98.346	4;3;2;2	4;3;2;2	130900000	121430000	77781000	95026000	111860000	92344000	97711000	99713000	107830000
AT3G56150.2;AT3G56150.1	eukaryotic translation initiation factor 3C ; eukaryotic translation initiation factor 3C	230.72	23;23	23;23	554610000	598750000	546780000	599540000	657220000	642930000	579520000	599080000	541420000
AT3G56190.2;AT3G56190.1	alpha-soluble NSF attachment protein 2 ; alpha-soluble NSF attachment protein 2	144.22	7;7;2	7;7;2	197150000	221010000	186430000	172140000	209190000	179700000	176400000	183450000	149540000
AT3G56240.1	copper chaperone	187.09	5	5	1014200000	726900000	532860000	858650000	853850000	758610000	916680000	742130000	1006000000
AT3G56310.1;AT3G56310.2	Melibiase family protein ; Melibiase family protein	19.291	4;3	4;3	44125000	45179000	62022000	44320000	46074000	0	51445000	39781000	31422000
[truncated: 1,510 more rows]

## Sheet: Significant
Table S9. Proteome analysis of Col-0 versus mkk1 and mkk2 - differentially abundant proteins (statistics)
Protein	Name	Description	Profile of log2 fold change values for mkk1 (left) and mkk2 (right)	Average log2 centered intensity values. Left to righ Col-0, mkk1, mkk2	Profile of log2 centered intensity	Log2 FC mkk1	Log2 FC mkk2	Average Col-0	Average mkk1	Average mkk2	ANOVA p value	ANOVA q-value	Col-0 1	Col-0 2	Col-0 3			mkk1 1	mkk1 2	mkk1 3			mkk2 1	mkk2 2	mkk2 3	Peptides	Razor + unique peptides	Unique peptides	Sequence coverage [%]	Unique + razor sequence coverage [%]	Unique sequence coverage [%]	Mol. weight [kDa]	Q-value	Score	Intensity	MS/MS count	Peptide counts (all)	Peptide counts (razor+unique)	Peptide counts (unique)	Mean	Std. dev.	Protein IDs	Majority protein IDs
AT4G35790	PHOSPHOLIPASE D DELTA (PLDDELTA)	Hydrolyzes glycerol-phospholipids at the terminal phosphodiesteric bond to generate phosphatidic acids (PA). May be involved in PA accumulation in the dehydration stress response and in the transduction of hormonal and environmental signals to the microtubules cytoskeleton (PubMed:11549769, PubMed:11489173, PubMed:12881496). Prefers phosphatidylethanolamine to phosphatidylcholine as substrate (Pu…				1.50408	2.02995	-1.55252	-0.0484367	0.47743	1.56364e-06	0	-1.58149	-1.5163	-1.55976			0	0.0701139	-0.215424			0.560595	0.332552	0.539143	15	15	15	25	25	25	97.778	0	52.364	2227700000	66	NaN	NaN	NaN	0.358305	0.229299	AT4G35790.2; AT4G35790.1; AT4G35790.3	AT4G35790.2; AT4G35790.1; AT4G35790.3
AT5G04800	40S RIBOSOMAL PROTEIN S17-4 (RPS17D)	Ribosomal S17 family protein;(source:Araport11)				-2.04071	-0.94322	1.20926	-0.831454	0.26604	0.00535117	0.168774	1.02098	1.026	1.5808			-1.3965	-0.84494	-0.252922			0.822957	-0.0248374	0	6	6	6	63.8	63.8	63.8	16.018	0	31	6379700000	33	NaN	NaN	NaN	1.6797	0.269237	AT5G04800.4; AT5G04800.3; AT5G04800.2; AT5G04800.1; AT3G10610.1; AT2G05220.2; AT2G05220.1; AT2G04390.1	AT5G04800.4; AT5G04800.3; AT5G04800.2; AT5G04800.1; AT3G10610.1; AT2G05220.2; AT2G05220.1; AT2G04390.1
AT4G29120	Probable 3-hydroxyisobutyrate dehydrogenase-like 1 (HIBADH-like)	Probable 3-hydroxyisobutyrate dehydrogenase-like 1, mitochondrial				-1.70231	-1.83275	1.39829	-0.304021	-0.434459	0.0049679	0.169571	1.6728	1.56982	0.95226			-0.899716	0.136821	-0.149168			-0.907356	0	-0.396021	8	8	8	35	35	35	35.371	0	47.116	1141900000	30	8	8	8	-0.77965	0.215952	AT4G29120.1	AT4G29120.1
AT1G73260	KUNITZ TRYPSIN INHIBITOR 1 (KTI1)	Exhibits Kunitz trypsin protease inhibitor activity. Involved in modulating programmed cell death (PCD) in plant-pathogen interactions.				1.76266	-0.0380576	-0.361269	1.40139	-0.399327	0.00434482	0.1705	0.0407007	-0.350904	-0.773605			1.87312	1.26465	1.06639			0	-0.202727	-0.995254	6	6	6	29.8	29.8	29.8	23.793	0	83.574	3322900000	30	6	6	6	0.716995	0.339193	AT1G73260.1	AT1G73260.1
AT5G23830		MD-2-related lipid recognition domain-containing protein;(source:Araport11)				1.89371	0.372008	-0.457307	1.43641	-0.0852987	0.00419077	0.171826	-0.312457	-0.18769	-0.871774			1.12699	1.68869	1.49354			0	-0.728771	0.472875	6	6	5	47.6	47.6	42.1	18.088	0	66.811	4568900000	55	NaN	NaN	NaN	1.20311	0.234706	AT5G23830.1; AT5G23830.2	AT5G23830.1; AT5G23830.2
AT5G61780	TUDOR-SN PROTEIN 2 (TUDOR2);TUDOR-SN PROTEIN 2 (TSN2)	Involved in the regulation of AtGA20ox3 expression, as well as seed germination. The mRNA is cell-to-cell mobile.				1.39714	1.94503	-1.39522	0.0019215	0.549811	0.00508297	0.173103	-1.90299	-1.46682	-0.815854			-0.0772911	0.073195	0.00986061			0	0.516744	1.13269	24	18	18	33.6	27.9	27.9	107.74	0	300.68	7176800000	117	24	18	18	2.0204	0.128051	AT5G61780.1	AT5G61780.1
AT2G33150	PEROXISOME DEFECTIVE 1 (PED1);3-KETOACYL-COA THIOLASE 2 (KAT2);PEROXISOMAL 3-KETOACYL-COA THIOLASE 3 (PKT3);POTASSIUM CHANNEL IN ARABIDOPSIS THALIANA 2 (KAT2)	Encodes an organellar (peroxisome, glyoxysome) 3-ketoacyl-CoA thiolase, involved in fatty acid b-oxidation during germination and subsequent seedling growth. Cytoprotective ribonuclease (RNase) required for resistance to abiotic stresses, acting as a positive regulator of mRNA decapping during stress (PubMed:25736060). Essential for the integrity and function of cytoplasmic messenger ribonucleopr…				1.20593	-0.877306	-0.0387607	1.16717	-0.916066	0.00534774	0.1744	-0.494772	0	0.37849			1.50738	0.484082	1.51005			-0.53583	-0.893149	-1.31922	13	13	12	46.5	46.5	44.4	48.578	0	323.31	12853000000	108	13	13	12	2.81251	0.129189	AT2G33150.1	AT2G33150.1
AT1G14650	PROBABLE SPLICING FACTOR 3A SUBUNIT 1	SWAP (Suppressor-of-White-APricot)/surp domain-containing protein / ubiquitin family protein;(source:Araport11)				-1.80215	-1.59115	1.46074	-0.341414	-0.130409	0.00496597	0.175852	1.53558	1.11629	1.73035			-0.635572	0	-0.388671			0.520128	-0.171985	-0.73937	5	5	5	8.8	8.8	8.8	87.593	0	6.891	257260000	8	NaN	NaN	NaN	-2.91579	0.226185	AT1G14650.2; AT1G14650.1	AT1G14650.2; AT1G14650.1
AT1G12080		Vacuolar calcium-binding protein-like protein;(source:Araport11)				2.05239	1.57346	-1.31354	0.738854	0.25992	0.00192874	0.1784	-1.17985	-1.54013	-1.22063			0.714997	0.652233	0.849333			-0.236231	0	1.01599	6	6	5	80.4	80.4	70.3	15.382	0	215.29	2529500000	60	NaN	NaN	NaN	0.539	0.418156	AT1G12080.2; AT1G12080.1	AT1G12080.2; AT1G12080.1
AT1G67730	BETA-KETOACYL REDUCTASE 1 (KCR1); (YBR159); (GLOSSY 8)	Beta-ketoacyl-coenzyme A reductase required for the elongation of fatty acids precursors of sphingolipids, triacylglycerols, cuticular waxes and suberin. Responsible for the first reduction step in very long-chain fatty acids (VLCFAs) synthesis. Decreased expression of KCR1 (RNAi) leads to plants with fused vegetative and reproductive organs, and abnormal trichome, epidermal cell and root morphol…				1.08998	2.11483	-1.06915	0.0208243	1.04568	0.00418425	0.179636	-1.64154	-0.381144	-1.18477			-0.448104	0	0.510577			0.947657	1.08513	1.10425	7	7	7	42.1	42.1	42.1	35.761	0	44.34	1697400000	28	7	7	7	-0.103853	0.27508	AT1G67730.1	AT1G67730.1
AT3G54640	TRYPTOPHAN SYNTHASE ALPHA CHAIN (TSA1);TRYPTOPHAN-REQUIRING 3 (TRP3)	Catalyzes the conversion of indole-3-glycerolphosphate to indole, the penultimate reaction in the biosynthesis of tryptophan. Functions as a heterocomplex with tryptophan synthase beta subunit (TSA2). The alpha subunit is responsible for the aldol cleavage of indoleglycerol phosphate to indole and glyceraldehyde 3-phosphate. Required for tryptophan biosynthesis. Contributes to the tryptophan-inde…				-1.15351	-2.10721	1.00736	-0.146146	-1.09985	0.0040163	0.18019	0.696889	1.35851	0.966693			0.322378	-0.760816	0			-1.2133	-1.49214	-0.594099	8	8	7	48.1	48.1	48.1	33.199	0	210.17	3411700000	84	8	8	7	0.90102	0.237885	AT3G54640.1	AT3G54640.1
AT3G04400	60S RIBOSOMAL PROTEIN L23 (RPL23A)	Ribosomal protein L14p/L23e family protein;(source:Araport11)				-1.09821	0.997964	0.113507	-0.984698	1.11147	0.00487137	0.180923	-0.224474	0.564995	0			-1.06528	-1.37348	-0.515335			0.935316	1.74311	0.655988	8	8	1	52.8	52.8	15.2	13.406	0	72.902	5301200000	43	8	8	1	1.54798	0.20821	AT3G04400.2	AT3G04400.2
AT3G29350	HISTIDINE-CONTAINING PHOSPHOTRANSMITTER 2 (AHP2)	Encodes AHP2, one of the six Arabidopsis thaliana histidine phosphotransfer proteins (AHPs). AHPs function in His-to-Asp phosphorelay signal transduction and as redundant positive regulators of cytokinin signaling. Functions as two-component phosphorelay mediators between cytokinin sensor histidine kinases and response regulators (B-type ARRs). Plays an important role in propagating cytokinin sig…				0.416813	-1.54148	0.155539	0.572352	-1.38594	0.00381295	0.181	0.568095	-0.40049	0.299013			0.961094	0.755962	0			-1.68886	-1.36127	-1.1077	4	4	4	53.5	53.5	53.5	12.689	0	88.295	645440000	30	NaN	NaN	NaN	-1.42195	0.290772	AT3G29350.2; AT3G29350.1	AT3G29350.2; AT3G29350.1
AT2G27710	60S ACIDIC RIBOSOMAL PROTEIN P2-2 (RPP2B)	60S acidic ribosomal protein family. Plays an important role in the elongation step of protein synthesis.				1.13416	2.17425	-1.04366	0.0904976	1.13059	0.00131519	0.181714	-1.33062	-0.730235	-1.07012			0.298674	-0.0271811	0			1.28693	0.509407	1.59544	5	5	3	67.8	67.8	57.4	11.444	0	309	18385000000	117	NaN	NaN	NaN	3.29622	0.0897497	AT2G27710.3; AT2G27710.2; AT2G27710.1; AT2G27710.4	AT2G27710.3; AT2G27710.2; AT2G27710.1; AT2G27710.4
AT3G06050	PEROXIREDOXIN IIF (PRXIIF)	Thiol-specific peroxidase that catalyzes the reduction of hydrogen peroxide and organic hydroperoxides to water and alcohols, respectively. Plays a role in cell protection against oxidative stress by detoxifying peroxides. Reduces preferentially hydrogen peroxide rather than alkyl peroxides. May be involved in mitochondrial redox homeostasis. Encodes a mitochondrial matrix localized peroxiredoxin…				-1.92161	-1.71102	1.32638	-0.595234	-0.384644	0.00366939	0.181895	1.2162	1.24368	1.51925			0	-0.529533	-1.25617			0.070121	-0.448388	-0.775664	7	7	7	47.3	47.3	47.3	21.445	0	87.702	4803800000	37	7	7	7	1.34899	0.156242	AT3G06050.1	AT3G06050.1
AT1G29850	PROGRAMMED CELL DEATH PROTEIN 5 (PDCD5)	Encodes a protein that by its interaction with HAM acetyltransferases plays an important role during DNA damage responses induced by UV-B radiation and participates in programmed cell death programs.				-1.15041	-1.9862	1.34794	0.197532	-0.638257	0.00479155	0.184	1.17396	1.56161	1.30826			-0.318528	0.911125	0			-0.280407	-1.06799	-0.566375	4	4	4	37.2	37.2	37.2	14.975	0	97.099	876830000	11	NaN	NaN	NaN	-1.09077	0.100521	AT1G29850.1; AT1G29850.2; AT1G29850.3	AT1G29850.1; AT1G29850.2; AT1G29850.3
AT2G46140	LATE EMBRYOGENESIS ABUNDANT 27 (LEA27)	Late embryogenesis abundant protein;(source:Araport11)				0.828093	-1.30394	0.109636	0.93773	-1.1943	0.0022588	0.184364	-0.155259	0	0.484168			1.57441	0.441757	0.797022			-0.941563	-1.49008	-1.15127	5	5	5	48.8	48.8	48.8	17.846	0	44.855	1256200000	28	5	5	5	-0.551571	0.200895	AT2G46140.1	AT2G46140.1
AT1G03230		Eukaryotic aspartyl protease family protein;(source:Araport11)				1.88928	0.299228	-0.515816	1.37347	-0.216588	0.00630266	0.184471	-0.59979	0	-0.947659			1.43145	1.49973	1.18922			0.463276	-0.243752	-0.869289	18	14	14	49.3	43.1	43.1	46.148	0	296.12	8863000000	93	18	14	14	2.27364	0.116748	AT1G03230.1	AT1G03230.1
AT2G33210	CHAPERONIN CPN60-LIKE 1 (HSP60-like 1)	Implicated in mitochondrial protein import and macromolecular assembly. May facilitate the correct folding of imported proteins. May also prevent misfolding and promote the refolding and proper assembly of unfolded polypeptides generated under stress conditions in the mitochondrial matrix (By similarity).				-1.11669	0.9614	-0.0246053	-1.1413	0.936794	0.00617099	0.184606	0	-0.325333	0.251517			-1.85204	-1.14089	-0.430962			0.556344	1.30536	0.948679	21	10	10	51.4	30.3	30.3	61.477	0	171.73	3792500000	84	NaN	NaN	NaN	1.05287	0.119249	AT2G33210.2; AT2G33210.1	AT2G33210.2; AT2G33210.1
AT4G04830	METHIONINE SULFOXIDE REDUCTASE B5 (MSRB5)	Catalyzes the reduction of methionine sulfoxide (MetSO) to methionine in proteins. Plays a protective role against oxidative stress by restoring activity to proteins that have been inactivated by methionine oxidation. MSRB family specifically reduces the MetSO R-enantiomer (By similarity).				-0.160703	-1.8171	0.40318	0.242477	-1.41392	0.00589404	0.18475	0	-0.033239	1.24278			0.26074	0.13063	0.336062			-1.03718	-1.75398	-1.45059	5	5	5	50.4	50.4	50.4	14.022	0	53.363	3072200000	39	NaN	NaN	NaN	0.742292	0.282094	AT4G04830.2; AT4G04830.1	AT4G04830.2; AT4G04830.1
AT1G13060	20S PROTEASOME BETA SUBUNIT E1 (PBE1)	Encodes 20S proteasome beta subunit PBE1 (PBE1). The proteasome is a multicatalytic proteinase complex which is characterized by its ability to cleave peptides with Arg, Phe, Tyr, Leu, and Glu adjacent to the leaving group at neutral or slightly basic pH. The proteasome has an ATP-dependent proteolytic activity.				1.42461	1.96098	-1.32126	0.103347	0.639718	0.00753848	0.186667	-1.54793	-1.50057	-0.915276			-0.0424108	0.078859	0.273592			1.50273	0	0.416424	10	10	5	63.9	63.9	27.4	29.667	0	270.03	4856000000	72	NaN	NaN	NaN	1.38778	0.0908458	AT1G13060.1; AT1G13060.2	AT1G13060.1; AT1G13060.2
AT5G23020	METHYLTHIOALKYLMALATE SYNTHASE 3 (MAM3)	methylthioalkymalate synthase-like. Also known as 2-isopropylmalate synthase (IMS2). encodes a methylthioalkylmalate synthase involved in the biosynthesis of aliphatic glucosinolates which accepts all the omega-methylthio-2-oxoalkanoic acids needed to form the known C3 to C8 glucosinolates in Arabidopsis. The mRNA is cell-to-cell mobile.				-1.79893	-1.42476	1.49914	-0.299791	0.0743808	0.00353476	0.187556	1.50078	1.14283	1.85382			-0.509008	0	-0.390364			0.650431	-0.0147107	-0.412578	6	6	6	18.9	18.9	18.9	55.229	0	8.6604	393250000	22	6	6	6	-2.61512	0.583456	AT5G23020.1	AT5G23020.1
AT1G32440	PLASTIDIAL PYRUVATE KINASE 3 (PKp3)	encodes a chloroplast pyruvate kinase beta subunit. The enzyme is less active than the other chloroplast pyruvate kinase beta subunit encoded by AT5G52920. Involved in seed oil biosynthesis. Can partially complement the AT5G52920 mutant.				-1.69328	-1.83536	1.49619	-0.197084	-0.339167	0.00156939	0.1885	1.84324	1.52197	1.12337			-0.0928564	-0.656993	0.158598			0	-0.652013	-0.365489	4	3	3	11	9.1	9.1	62.614	0	4.8533	329940000	10	4	3	3	-2.70179	0.40258	AT1G32440.1	AT1G32440.1
AT3G50590		Transducin/WD40 repeat-like superfamily protein;(source:Araport11)				-1.58455	-1.64034	1.53065	-0.0539017	-0.109691	0.00345103	0.189176	1.75832	0.925923	1.9077			-0.408751	0.391665	-0.144619			0	-0.0748001	-0.254274	12	12	12	13.2	13.2	13.2	176.3	0	13.6	656200000	18	12	12	12	-1.69454	0.329323	AT3G50590.1	AT3G50590.1
AT5G17770	NADH:CYTOCHROME B5 REDUCTASE 1 (CBR1)	Encodes NADH:cytochrome (Cyt) b5 reductase that displayed strict specificity to NADH for the reduction of a recombinant Cyt b5 (AtB5-A), whereas no Cyt b5 reduction was observed when NADPH was used as the electron donor.				1.7109	1.39301	-1.48453	0.226375	-0.0915167	0.00750588	0.190732	-1.50201	-1.04953	-1.90204			0.66482	0.0143054	0			-0.700073	0.182037	0.243486	8	8	8	50.5	50.5	50.5	31.49	0	97.824	4156200000	78	8	8	8	1.36009	0.291462	AT5G17770.1	AT5G17770.1
AT3G16410	NITRILE SPECIFIER PROTEIN 4 (NSP4)	Encodes a nitrile-specifier protein NSP4. The mRNA is cell-to-cell Promotes simple nitriles, but not epithionitrile or thiocyanate formation. Converts allylglucosinolate and benzylglucosinolate to their corresponding simple nitriles in the presence of myrosinase.				0.158156	-1.58994	0.138511	0.296667	-1.45143	0.00741266	0.191	-0.417112	0	0.832645			0.245194	0.52082	0.123987			-0.990193	-1.95309	-1.411	27	27	11	71.1	71.1	28.1	67.603	0	323.31	108360000000	432	27	27	11	5.87247	0.201754	AT3G16410.1	AT3G16410.1
AT1G62480		Vacuolar calcium-binding protein-like protein;(source:Araport11)				1.98822	1.5848	-1.33923	0.648986	0.245567	0.00341466	0.19125	-1.08884	-1.53578	-1.39308			0.621793	0.97611	0.349056			-0.257155	0	0.993855	7	7	7	66.4	66.4	66.4	16.628	0	323.31	6613700000	63	7	7	7	1.91005	0.691764	AT1G62480.1	AT1G62480.1
AT5G23900	60S RIBOSOMAL PROTEIN L13-3 (RPL13D)	Ribosomal protein L13e family protein;(source:Araport11)				-2.12236	-1.31508	1.2106	-0.911763	-0.104485	0.00247254	0.191667	1.02967	1.76143	0.840696			-1.33551	-0.79088	-0.608898			0	0.231482	-0.544936	7	4	4	34	17	17	23.485	0	6.5776	1273500000	29	NaN	NaN	NaN	-0.632113	0.332226	AT5G23900.1; AT3G48960.1	AT5G23900.1
AT5G48020		2-oxoglutarate (2OG) and Fe(II)-dependent oxygenase superfamily protein;(source:Araport11)				-1.16211	-2.00778	1.26246	0.100344	-0.745324	0.00797052	0.192465	1.84274	1.06885	0.875783			0	0.701499	-0.400468			-0.69443	-1.20204	-0.339503	2	2	2	9.9	9.9	9.9	39.846	0	7.5837	685720000	18	2	2	2	-1.53838	0.284673	AT5G48020.1	AT5G48020.1
AT2G32060	40S RIBOSOMAL PROTEIN S12-2	Ribosomal protein L7Ae/L30e/S12e/Gadd45 family protein;(source:Araport11)				-1.60474	-1.85788	1.53303	-0.0717091	-0.324846	0.000779651	0.193	1.35607	1.6341	1.60893			-0.0120414	0.226624	-0.42971			-0.796398	0	-0.17814	6	4	4	66.7	54.2	54.2	15.329	0	38.21	10567000000	30	NaN	NaN	NaN	2.41081	0.22762	AT2G32060.3; AT2G32060.2; AT2G32060.1	AT2G32060.3; AT2G32060.2; AT2G32060.1
AT3G44320	NITRILASE 3 (NIT3)	This enzyme catalyzes the hydrolysis of indole-3-acetonitrile (IAN) to indole-3-acetic acid (IAA) (EC 3.5.5.1) and IAN to indole-3-acetamide (IAM) at lower levels. It is the only one of the four Arabidopsis nitrilases whose mRNA levels are strongly induced when plants experience sulphur deprivation. This enzyme likely participates in other non-auxin-related metabolic pathways.				-1.73713	-1.75125	1.3853	-0.351833	-0.365958	0.0073638	0.194359	1.01759	1.73157	1.40673			0.251447	-0.179357	-1.12759			0	-0.643178	-0.454695	14	14	10	63.6	63.6	49.4	38.022	0	323.31	9343500000	86	14	14	10	2.0962	0.178274	AT3G44320.1	AT3G44320.1
AT5G61510		GroES-like zinc-binding alcohol dehydrogenase family protein;(source:Araport11)				1.15814	-0.957942	0.0327618	1.1909	-0.92518	0.00326981	0.194667	-0.0709526	0	0.169238			1.54134	0.746962	1.2844			-0.259425	-1.53214	-0.983975	8	8	8	38.2	38.2	38.2	44.022	0	49.873	1191600000	59	8	8	8	-0.695219	0.28995	AT5G61510.1	AT5G61510.1
AT5G60390	ELONGATION FACTOR 1-ALPHA 4 (EF1ALPHA)	GTP binding Elongation factor Tu family protein. This protein promotes the GTP-dependent binding of aminoacyl-tRNA to the A-site of ribosomes during protein biosynthesis.				1.70651	1.7386	-1.41415	0.292362	0.324449	0.00729596	0.197579	-1.46023	-1.93745	-0.844769			-0.221618	0.230146	0.868558			0	0.674022	0.299325	23	23	23	63	63	63	49.502	0	323.31	129330000000	1620	NaN	NaN	NaN	5.81704	0.077613	AT5G60390.3; AT5G60390.1; AT1G07940.2; AT1G07940.1; AT1G07930.1; AT1G07920.1; AT5G60390.2; AT1G07930.2; AT1G35550.1	AT5G60390.3; AT5G60390.1; AT1G07940.2; AT1G07940.1; AT1G07930.1; AT1G07920.1; AT5G60390.2; AT1G07930.2
AT5G51970	SORBITOL DEHYDROGENASE (ATSDH)	Encodes a putative sorbitol dehydrogenase that can be thiolated in vitro.				-0.414924	-1.92239	0.563952	0.149028	-1.35844	0.00689296	0.197714	1.20542	0	0.486437			0.586677	-0.352118	0.212525			-1.10915	-1.77269	-1.19347	15	15	15	62.4	62.4	62.4	39.255	0	114.48	2326400000	65	NaN	NaN	NaN	0.371342	0.133822	AT5G51970.2; AT5G51970.1	AT5G51970.2; AT5G51970.1
AT5G42250		Zinc-binding alcohol dehydrogenase family protein;(source:Araport11)				-1.8589	-1.82405	1.44258	-0.416318	-0.381462	0.00117511	0.198	1.18472	1.59847	1.54456			0	-0.345276	-0.903679			-0.489958	-0.691629	0.0372006	8	8	8	26.9	26.9	26.9	42.568	0	35.539	2691600000	53	8	8	8	0.494768	0.145356	AT5G42250.1	AT5G42250.1
AT2G21620	RESPONSIVE TO DESICCATION 2 (RD2)	Encodes gene that is induced in response to desiccation; mRNA expression is seen 10 and 24 hrs after start of desiccation treatment.				-1.77088	-1.75517	1.49154	-0.279333	-0.263624	0.00192562	0.198222	1.34904	1.13384	1.99175			-0.475157	-0.362843	0			0.131853	-0.713275	-0.20945	12	12	12	75.9	75.9	75.9	20.587	0	165.32	4916800000	77	NaN	NaN	NaN	1.3009	0.219156	AT2G21620.1; AT2G21620.2	AT2G21620.1; AT2G21620.2
AT1G48620	HIGH MOBILITY GROUP A5 (HON5)	This gene is predicted to encodes a histone H1/H5 family member. A plant line expressing an RNAi construct targeted against HON5 shows a reduced level of agrobacterium-mediated root transformation.				-1.00279	-2.12588	0.937438	-0.0653497	-1.18844	0.00280123	0.199692	0.988113	0.636621	1.18758			0.284185	0	-0.480234			-0.663503	-1.80168	-1.10014	6	6	6	24.6	24.6	24.6	51.391	0	14.904	833890000	25	6	6	6	-1.17354	0.272809	AT1G48620.1	AT1G48620.1
AT1G05500	SYNAPTOTAGMIN HOMOLOG E (SYTE);SYNAPTOTAGMIN 5 (SYT5); (NTMC2T2.1); (NTMC2TYPE2.1);ARABIDOPSIS THALIANA SYNAPTOTAGMIN HOMOLOG E (ATSYTE)	Encodes a endomembrane-localized synaptotagmin. Synaptotagmin family proteins are calcium sensors that regulate exocytosis in mammalian cells.				0.636792	1.98967	-0.918137	-0.281345	1.07153	0.0112534	0.19986	-0.357574	-0.886766	-1.51007			0	-1.05378	0.209746			0.734015	1.10683	1.37375	7	7	7	21.6	21.6	21.6	62.928	0	12.91	648370000	20	7	7	7	-1.49255	0.325815	AT1G05500.1	AT1G05500.1
AT1G48420	1-AMINOCYCLOPROPANE-1-CARBOXYLIC ACID DEAMINASE 1 (ACD1); D-CYSTEINE DESULFHYDRASE (DCD)	Encodes an enzyme that decomposes D-cysteine into pyruvate, H2S, and NH3. Only D-cysteine but not L-cysteine was converted by D-CDes to pyruvate, H2S, and NH3. There is conflicting evidence on its 1-aminocyclopropane-1-carboxylate deaminase activity. Involved in regulating ethylene levels.				-1.74607	-1.66332	1.36904	-0.377034	-0.294288	0.0113998	0.199862	1.16545	1.0968	1.84486			-0.861326	0.498203	-0.767979			0	-0.622577	-0.260288	6	6	6	21.7	21.7	21.7	43.9	0	46.259	781520000	23	6	6	6	-1.30011	0.242456	AT1G48420.1	AT1G48420.1
AT5G37850	SALT OVERLY SENSITIVE 4 (SOS4);SALT OVERLY SENSITIVE 4 (ATSOS4)	Encodes a pyridoxal kinase required for root hair development. Mutants are hypersensitive to Na+, K+ and Li+.				-1.24865	-2.00875	1.11355	-0.135097	-0.8952	0.0118273	0.2014	0.5298	1.15687	1.65398			-0.810967	0.405676	0			-1.20509	-0.36951	-1.111	2	2	2	9.1	9.1	9.1	34.043	0	10.626	349600000	12	NaN	NaN	NaN	-2.44941	0.28769	AT5G37850.2; AT5G37850.3; AT5G37850.1	AT5G37850.2; AT5G37850.3; AT5G37850.1
AT2G39800	DELTA1-PYRROLINE-5-CARBOXYLATE SYNTHASE 1 (P5CS1)	encodes a delta1-pyrroline-5-carboxylate synthase that catalyzes the rate-limiting enzyme in the biosynthesis of proline. Gene is expressed in reproductive organs and tissues under non-stress conditions but in the whole plant under water-limiting condition. Expression is also induced by abscisic acid and salt stress in a light-dependent manner. encodes a delta1-pyrroline-5-carboxylate synthase th…				2.00304	1.28045	-1.05631	0.946724	0.224141	0.0116975	0.201559	-1.45541	-0.623242	-1.09029			0.617972	1.217	1.0052			1.11247	-0.440048	0	9	9	6	19.7	19.7	13.8	66.758	0	36.068	956790000	23	NaN	NaN	NaN	-0.984941	0.264581	AT2G39800.2; AT2G39800.3; AT2G39800.4; AT2G39800.1	AT2G39800.2; AT2G39800.3; AT2G39800.4; AT2G39800.1
AT5G03630	MONODEHYDROASCORBATE REDUCTASE 2 (MDAR2)	Pyridine nucleotide-disulfide oxidoreductase family protein. Catalyzes the conversion of monodehydroascorbate to ascorbate, oxidizing NADH in the process.				1.73018	0.481828	-0.28527	1.44491	0.196558	0.0111586	0.202214	-0.0883201	-0.460528	-0.306963			2.09719	0.702108	1.53543			0	-0.0680303	0.657703	21	21	21	68.3	68.3	68.3	47.479	0	323.31	16709000000	249	21	21	21	3.00647	0.124651	AT5G03630.1	AT5G03630.1
AT5G27380	GLUTATHIONE SYNTHETASE 2 (GSH2); (GSHB)	Encodes a protein with similarity to glutathione synthetases, which catalyzes one of the early steps in glutathione biosynthesis. Two transcripts have been detected; the longer transcript is less abundant and the protein is localized to the chloroplast. The smaller transcript, in which the transit peptide is truncated, is localized to the cytosol.				-1.3629	-1.96097	1.33923	-0.02367	-0.62174	0.00729201	0.202919	1.00933	0.928875	2.0795			0.407331	-0.478341	0			-0.73028	-0.900665	-0.234274	6	6	6	16.5	16.5	16.5	60.27	0	45.512	1206500000	28	6	6	6	-0.64805	0.208383	AT5G27380.1	AT5G27380.1
AT1G75270	DEHYDROASCORBATE REDUCTASE 2 (DHAR2)	Displays a dual function. As a soluble protein, exhibits glutathione-dependent thiol transferase and dehydroascorbate (DHA) reductase activities (PubMed:12077129). Exhibits glutathione-dependent thiol transferase and dehydroascorbate (DHA) reductase activities. Key component of the ascorbate recycling system. Involved in the redox homeostasis, especially in scavenging of ROS under oxidative stres…				-1.74849	-1.87936	1.50429	-0.244196	-0.375066	0.000605056	0.204	1.2347	1.87039	1.40779			-0.267349	-0.465239	0			0.018274	-0.408549	-0.734924	12	12	12	64.3	64.3	64.3	23.407	0	78.428	9827100000	72	12	12	12	2.31056	0.208229	AT1G75270.1	AT1G75270.1
AT5G21274	CALMODULIN 6 (CAM6)	Encodes a calmodulin isoform. Expressed in leaves. Calmodulin mediates the control of a large number of enzymes, ion channels and other proteins by Ca2+. Among the enzymes to be stimulated by the calmodulin-Ca2+ complex are a number of protein kinases and phosphatases.				1.87549	1.47151	-1.34585	0.529647	0.125666	0.011079	0.2048	-0.519381	-1.84243	-1.67573			0.817715	0.529762	0.241464			-0.285287	0	0.662284	8	8	3	69.1	69.1	34.2	16.833	0	188.03	4157700000	44	NaN	NaN	NaN	1.30764	0.414307	AT5G21274.1; AT3G56800.1; AT3G43810.1; AT2G41110.1; AT2G27030.1; AT2G41110.2; AT2G27030.3; AT2G27030.2	AT5G21274.1; AT3G56800.1; AT3G43810.1; AT2G41110.1; AT2G27030.1; AT2G41110.2; AT2G27030.3; AT2G27030.2
AT5G45775	60S RIBOSOMAL PROTEIN L11-2	Component of the ribosome, a large ribonucleoprotein complex responsible for the synthesis of proteins in the cell. The small ribosomal subunit (SSU) binds messenger RNAs (mRNAs) and translates the encoded message by selecting cognate aminoacyl-transfer RNA (tRNA) molecules. The large subunit (LSU) contains the ribosomal catalytic site termed the peptidyl transferase center (PTC), which catalyzes…				-1.81275	-0.612524	0.403979	-1.40877	-0.208545	0.0104244	0.204923	0.619289	0	0.592647			-1.1456	-1.42164	-1.65908			0.00267531	0.3865	-1.01481	9	9	9	51.2	51.2	51.2	19.775	0	83.243	17035000000	77	NaN	NaN	NaN	3.22932	0.206754	AT5G45775.1; AT5G45775.2; AT4G18730.1; AT3G58700.1; AT2G42740.1	AT5G45775.1; AT5G45775.2; AT4G18730.1; AT3G58700.1; AT2G42740.1
AT5G35530	40S RIBOSOMAL PROTEIN S3-3 (RPS3C)	Ribosomal protein S3 family protein;(source:Araport11)				-1.82764	-0.392845	0.42786	-1.39978	0.035015	0.0106904	0.20566	0	0.452903	0.830676			-0.646185	-1.7007	-1.85246			0.201669	0.350419	-0.447043	15	3	3	60.1	18.1	18.1	27.458	0	12.933	1608800000	14	15	3	3	-0.785519	0.170553	AT5G35530.1	AT5G35530.1
AT2G44060	LATE EMBRYOGENESIS ABUNDANT 26 (LEA26)	Late embryogenesis abundant protein, group 2;(source:Araport11)				1.77969	0.0045008	-0.459406	1.32028	-0.454905	0.0072523	0.208111	-0.445839	0.0564546	-0.988834			0.899607	1.16289	1.89834			-0.931083	-0.433633	0	16	16	16	60.3	60.3	60.3	36.036	0	122.4	13083000000	129	NaN	NaN	NaN	2.80702	0.12798	AT2G44060.2; AT2G44060.1	AT2G44060.2;AT2G44060.1
AT4G31490		Coatomer, beta subunit. The coatomer is a cytosolic protein complex that binds to dilysine motifs and reversibly associates with Golgi non-clathrin-coated vesicles, which further mediate biosynthetic protein transport from the ER, via the Golgi up to the trans Golgi network. Coatomer complex is required for budding from Golgi membranes, and is essential for the retrograde Golgi-to-ER transport of…				1.70004	1.75367	-1.33993	0.36011	0.413745	0.011064	0.208296	-0.655226	-1.75197	-1.61258			0.36056	0.965424	-0.245654			0	0.684504	0.556731	18	18	3	27.6	27.6	5.1	106.08	0	190.54	4107200000	99	18	18	3	1.07533	0.158308	AT4G31490.1	AT4G31490.1
AT3G02560	40S RIBOSOMAL PROTEIN S7-2 (RPS7B)	Ribosomal protein S7e family protein;(source:Araport11)				-1.27045	0.744494	0.11305	-1.1574	0.857544	0.0103675	0.208549	0	0.708303	-0.369154			-0.692271	-0.929348	-1.85058			0.362232	1.20602	1.00438	7	4	4	34	24.1	24.1	22.196	0	279.11	1653100000	26	NaN	NaN	NaN	-0.136078	0.190955	AT3G02560.2; AT3G02560.1	AT3G02560.2; AT3G02560.1
AT4G18100	60S RIBOSOMAL PROTEIN L32-1 (RPL32A)	Ribosomal protein L32e;(source:Araport11)				-1.4651	0.331335	-0.0388583	-1.50396	0.292476	0.00324763	0.208571	0.113623	0	-0.230198			-2.23474	-1.26317	-1.01396			0.465445	0.119876	0.292108	3	3	3	30.8	30.8	30.8	15.503	0	131.56	6995400000	43	3	3	3	1.98845	0.284887	AT4G18100.1	AT4G18100.1
ATMG01190	ATP SYNTHASE SUBUNIT ALPHA (ATPA)	Mitochondrial membrane ATP synthase (F1F0 ATP synthase or Complex V) produces ATP from ADP in the presence of a proton gradient across the membrane which is generated by electron transport complexes of the respiratory chain. F-type ATPases consist of two structural domains, F1 - containing the extramembraneous catalytic core, and F0 - containing the membrane proton channel, linked together by a c…				0.934314	1.89225	-0.586183	0.348132	1.30607	0.0102107	0.21048	-0.783339	-0.435315	-0.539894			-0.0759045	1.1203	0			0.739983	1.43681	1.74142	18	18	18	43.6	43.6	43.6	54.971	0	323.31	40953000000	194	NaN	NaN	NaN	4.43036	0.105363	ATMG01190.1; AT2G07698.1	ATMG01190.1; AT2G07698.1
AT2G27530	PIGGYBACK1 (PGY1)	Encodes ribosomal protein L10aP. Identified in a screen for enhancers of as1. as1/pgy double mutants show defects in leaf vascular patterning and adaxial cell fate. Double mutant analysis indicates pgy genes function in the same pathway as REV, KAN1 and KAN2.				-1.96818	-0.545928	0.736017	-1.23216	0.190089	0.010149	0.214041	0	1.06386	1.14419			-1.72691	-1.19682	-0.77275			0.548321	0.361973	-0.340028	8	8	5	51.9	51.9	33.8	24.425	0	296.77	13953000000	143	NaN	NaN	NaN	2.82242	0.149058	AT2G27530.2; AT2G27530.1	AT2G27530.2; AT2G27530.1
AT5G23140	ATP-DEPENDENT CLP PROTEASE PROTEOLYTIC SUBUNIT 2 (CLPP2); NUCLEAR-ENCODED CLP PROTEASE P7 (NCLPP7)	One of several nuclear-encoded ClpPs (caseinolytic protease). Contains a highly conserved catalytic triad of Ser-type proteases (Ser-His-Asp). The name reflects nomenclature described in Adam et. al (2001). Component of the mitochondrial ATP-dependent Clp protease (PubMed:11352464). Cleaves peptides in various proteins in a process that requires ATP hydrolysis (By similarity). Has a chymotrypsin-…				-1.10767	-2.01375	1.08627	-0.0214046	-0.927483	0.0130295	0.214387	1.64186	0.218279	1.39866			-0.150677	0.0864631	0			-0.723572	-1.58944	-0.469436	4	4	4	30.7	30.7	30.7	26.283	0	49.378	593700000	20	4	4	4	-1.70794	0.330388	AT5G23140.1	AT5G23140.1
AT5G35590	PROTEASOME ALPHA SUBUNIT A1 (PAA1)	Encodes 20S proteasome subunit PAA1 (PAA1).				1.90194	0.390228	-0.746455	1.15549	-0.356227	0.0143249	0.216299	-0.0853236	-1.20795	-0.946091			1.60204	0.786716	1.07771			0	-1.13455	0.0658696	11	7	7	68.7	52.8	52.8	27.294	0	216.79	3059300000	71	11	7	7	0.692272	0.164125	AT5G35590.1	AT5G35590.1
AT5G27120	PROBABLE NUCLEOLAR PROTEIN 5-1 (NOP5-1)	Required for 60S ribosomal subunit biogenesis. SAR DNA-binding protein, putative, strong similarity to SAR DNA-binding protein-1 (Pisum sativum) GI:3132696; contains Pfam profile PF01798: Putative snoRNA binding domain; has similarity to MAR binding NOP58 protein The mRNA is cell-to-cell mobile.				0.398198	1.83163	-0.459331	-0.0611323	1.3723	0.0129034	0.21659	-0.0691589	-0.378545	-0.930288			0.151404	-0.334801	0			0.558538	2.10208	1.45629	8	4	4	19.7	11.1	11.1	58.754	0	18.009	298300000	12	8	4	4	-2.72639	0.324442	AT5G27120.1	AT5G27120.1
AT2G38760	ANNEXIN 3 (ANN3)	Annexins are calcium binding proteins that are localized in the cytoplasm. When cytosolic Ca2+ increases, they relocate to the plasma membrane. The mRNA is cell-to-cell mobile.				1.60944	-0.231135	-0.0817782	1.52766	-0.312913	0.0010605	0.2168	-0.386787	0.186215	-0.0447626			1.44052	1.14672	1.99575			0	-0.466671	-0.472069	9	9	9	38.6	38.6	38.6	36.255	0	100.01	1999800000	42	9	9	9	0.0335712	0.209515	AT2G38760.1	AT2G38760.1
AT2G01520	MLP-LIKE PROTEIN 328 (MLP328); (ZUSAMMEN-CA)-ENHANCED 1 (ZCE1)	Encodes a cis-cinnamic acid responsive gene that is a member of the major latex protein-like gene family and plays a role in promoting vegetative growth and delaying flowering. The mRNA is cell-to-cell mobile.				-0.147067	-1.80269	0.562323	0.415256	-1.24037	0.0141559	0.217515	0.4096	0	1.27737			1.16183	0.380503	-0.296564			-1.2041	-1.274	-1.243	15	15	9	92.7	92.7	66.9	17.513	0	323.31	289260000000	392	15	15	9	7.20281	0.294852	AT2G01520.1	AT2G01520.1
AT1G70770		transmembrane protein (Protein of unknown function DUF2359, transmembrane);(source:Araport11)				1.30813	1.95318	-1.30469	0.00343757	0.648489	0.00999913	0.21775	-1.44707	-0.431077	-2.03592			0	0.0983139	-0.0880012			0.29293	0.595486	1.05705	14	14	11	28.2	28.2	24.1	66.864	0	323.31	5740700000	83	NaN	NaN	NaN	1.7064	0.166826	AT1G70770.2; AT1G70770.1; AT3G11880.1	AT1G70770.2; AT1G70770.1
AT5G17990	PHOSPHORIBOSYLANTHRANILATE TRANSFERASE 1 (PAT1);TRYPTOPHAN BIOSYNTHESIS 1 (TRP1)	Encodes the tryptophan biosynthetic enzyme phosphoribosylanthranilate transferase (PAT1, called trpD in bacteria). Converts anthranilate and phosphoribosylpyrophosphate into phosphoribosylanthranilate and inorganic pyrophosphate. The mRNA is cell-to-cell mobile.				-1.62087	-1.63263	1.41108	-0.20979	-0.221549	0.0152881	0.218	0.58303	1.61821	2.03199			-0.0253787	0	-0.603991			0.199726	-0.690605	-0.173767	2	2	2	5.2	5.2	5.2	46.52	0.00034341	2.668	228920000	8	2	2	2	-3.30293	0.489113	AT5G17990.1	AT5G17990.1
AT5G48010	THALIANOL SYNTHASE (THAS);ARABIDOPSIS THALIANA THALIANOL SYNTHASE 1 (AtTHAS1);THALIANOL SYNTHASE 1 (THAS1)	Encodes an oxidosqualene cyclase involved in the biosynthesis of thalianol, a tricyclic triterpenoid of unknown function. Overexpression of THAS leads to dwarfing in the aerial tissues of Arabidopsis plants, but increases their root length. THAS is part of a small operon-like cluster of genes (with At5g48000 (THAH) and At5g47990 (THAD)) involved in thalianol metabolism.				1.4131	1.97649	-1.24653	0.166566	0.729952	0.0093023	0.2184	-1.72035	-1.14893	-0.870321			0	-0.199765	0.699464			0.602638	0.156849	1.43037	11	11	11	26	26	26	87.252	0	48.47	1233700000	42	NaN	NaN	NaN	-0.560642	0.318348	AT5G48010.1; AT5G48010.2	AT5G48010.1; AT5G48010.2
AT4G37070	PHOSPHOLIPASE A IVA (AtPLAIVA); (PLP1); (PLA IVA)	Patatin-related phospholipase A. Expressed strongly and exclusively in roots. AtplaIVA-null mutants have reduced lateral root development. Phosphorylation by calcium-dependent protein kinases in vitro enhances its activity.				1.89021	1.0092	-1.291	0.599203	-0.281807	0.0136306	0.218438	-1.57505	-0.869838	-1.42812			0.755055	0.971453	0.0710997			0.227998	-1.07342	0	14	14	14	59.5	59.5	59.5	42.13	0	315.9	7835100000	113	NaN	NaN	NaN	2.21602	0.346463	AT4G37070.3; AT4G37070.1; AT4G37070.2; AT4G37070.4; AT4G37060.1; AT4G37060.2	AT4G37070.3; AT4G37070.1; AT4G37070.2; AT4G37070.4
AT5G63560	FATTY ALCOHOL:CAFFEOYL-COA CAFFEOYL TRANSFERASE (FACT)	Involved in the synthesis of alkyl hydroxycinnamates in root waxes. Functions as a fatty alcohol:hydroxy cinnamoyl-CoA acyltransferase with apparent preference for caffeoyl-CoA.				1.01763	-0.981708	0.0701478	1.08778	-0.91156	0.0146489	0.218765	-0.0659335	0.276377	0			0.837891	0.58291	1.84254			-0.571932	-1.72036	-0.442389	15	15	14	45.3	45.3	43.4	47.112	0	76.954	2546100000	56	NaN	NaN	NaN	0.458532	0.231427	AT5G63560.1; AT3G48720.1	AT5G63560.1
AT1G05520		Sec23/Sec24 protein transport family protein;(source:Araport11)				1.75172	1.60641	-1.34136	0.410363	0.265055	0.0155552	0.21989	-0.535303	-1.77142	-1.71735			0.165099	0	1.06599			0.315286	-0.112252	0.592132	6	4	3	14	11.1	8.9	86.356	0	41.58	560760000	33	6	4	3	-1.62066	0.321433	AT1G05520.1	AT1G05520.1
AT3G04610	FLOWERING LOCUS KH DOMAIN (FLK)	Regulates positively flowering by repressing FLC expression and post-transcriptional modification.				-1.86455	-1.53999	1.2303	-0.634249	-0.309688	0.0152744	0.219944	1.05529	0.916735	1.71887			-1.13065	-0.317028	-0.45507			0	-1.19731	0.268247	3	3	3	4.2	4.2	4.2	63.403	0	27.034	301660000	19	3	3	3	-2.76274	0.347059	AT3G04610.1	AT3G04610.1
AT5G02240		Protein is tyrosine-phosphorylated and its phosphorylation state is modulated in response to ABA in Arabidopsis thaliana seeds. The mRNA is cell-to-cell mobile.				-1.92866	-1.34343	1.26241	-0.666251	-0.0810287	0.0140784	0.220369	1.032	0.845277	1.90994			-0.880741	-0.0163418	-1.10167			0.404492	-0.647578	0	3	3	3	17	17	17	27.103	0	48.664	528920000	12	3	3	3	-2.01534	0.322369	AT5G02240.1	AT5G02240.1
AT5G45280	PECTIN ACETYLESTERASE 11 (PAE11)	Hydrolyzes acetyl esters in homogalacturonan regions of pectin. In type I primary cell wall, galacturonic acid residues of pectin can be acetylated at the O-2 and O-3 positions. Decreasing the degree of acetylation of pectin gels in vitro alters their physical properties.				1.54772	0.254303	-0.0660862	1.48164	0.188217	0.0135766	0.220762	0	-0.194076	-0.00418259			2.08905	1.40957	0.946293			-0.132996	-0.128044	0.82569	7	5	5	30.2	23.3	23.3	42.009	0	23.993	854630000	26	NaN	NaN	NaN	-1.20093	0.220714	AT5G45280.2; AT5G45280.1	AT5G45280.2; AT5G45280.1
AT4G14716	ACIREDUCTONE DIOXYGENASE 1 (ARD1); SUPPRESSOR OF G BETA 3 (SGB3)	Encodes an acireductone dioxygenase that is activated by interaction with a heterotrimeric G protein beta subunit. It is a metalloenzyme and is likely involved in the methionine salvage pathway.				-1.88893	-0.757512	0.533254	-1.35567	-0.224258	0.00989913	0.221191	0.339136	0.0901273	1.1705			-1.38982	-1.4058	-1.2714			0	-0.95127	0.278497	7	7	7	50	50	50	22.588	0	47.004	3247800000	34	NaN	NaN	NaN	0.879272	0.255943	AT4G14716.1; AT4G14710.2; AT4G14710.1; AT4G14710.3; AT4G14710.5; AT4G14710.4	AT4G14716.1; AT4G14710.2; AT4G14710.1; AT4G14710.3; AT4G14710.5; AT4G14710.4
AT5G66420		TIM-barrel signal transduction protein;(source:Araport11)				-1.19733	0.84393	0.0802467	-1.11708	0.924177	0.00921836	0.221455	0.457086	0	-0.216346			-0.913582	-0.623853	-1.81381			0.312167	1.46082	0.999543	13	13	13	32.8	32.8	32.8	80.718	0	71.448	1711200000	58	NaN	NaN	NaN	-0.174463	0.122836	AT5G66420.2; AT5G66420.1	AT5G66420.2; AT5G66420.1
AT1G16890	UBIQUITIN-CONJUGATING ENZYME 36 (UBC36)	UBC36/UBC13B encodes a protein that may play a role in DNA damage responses and error-free post-replicative DNA repair. It can bind to the MMZ/UEV1 proteins in vitro. Catalyzes the synthesis of non-canonical poly-ubiquitin chains that are linked through 'Lys-63'. This type of poly-ubiquitination does not lead to protein degradation by the proteasome. Mediates transcriptional activation of target …				1.02574	-0.969615	0.0281682	1.05391	-0.941447	0.0158944	0.221514	-0.0463915	-0.205405	0.336301			1.31794	0.519715	1.32408			0	-1.19556	-1.62878	6	6	6	61.4	61.4	61.4	17.22	0	73.38	2639800000	54	NaN	NaN	NaN	0.528965	0.140076	AT1G16890.2; AT1G16890.1; AT1G78870.2; AT1G16890.3; AT1G78870.3; AT1G78870.1	AT1G16890.2; AT1G16890.1; AT1G78870.2; AT1G16890.3; AT1G78870.3; AT1G78870.1
AT5G27470		seryl-tRNA synthetase / serine-tRNA ligase;(source:Araport11)				1.94258	1.67445	-1.49656	0.446019	0.177893	0.000539424	0.222	-1.58769	-1.12792	-1.77406			0.455079	0.259593	0.623386			-0.089718	0	0.623397	15	15	15	50.1	50.1	50.1	51.628	0	296.94	5710100000	98	15	15	15	1.681	0.176347	AT5G27470.1	AT5G27470.1
AT3G27890	NADPH:QUINONE OXIDOREDUCTASE (NQR)	Encodes NAD(P)H:quinone reductase which is an FMN binding protein that catalyzes the reduction of quinone substrates to hydroquinones.The enzyme activity was confirmed by in vitro assay.				-0.930942	-1.9432	1.18538	0.254435	-0.75782	0.0152258	0.222229	1.06651	1.05218	1.43744			-0.0162056	-0.2295	1.00901			0	-1.00659	-1.26687	9	9	9	82.1	82.1	82.1	21.556	0	125.69	3261000000	43	9	9	9	0.706024	0.304129	AT3G27890.1	AT3G27890.1
AT4G03520	THIOREDOXIN M2 (TRXM2); (ATHM2)	Encodes a redox activated co-chaperone, chloroplast localized thioredoxin, similar to prokaryotic types.				-0.945359	-2.00253	0.960638	0.015279	-1.04189	0.015053	0.224	1.13348	0.98391	0.764524			0.47345	0	-0.427613			-0.118998	-1.17059	-1.83608	4	4	4	30.1	30.1	30.1	20.312	0	27.227	521650000	22	NaN	NaN	NaN	-1.83843	0.27314	AT4G03520.1; AT4G03520.2	AT4G03520.1; AT4G03520.2
AT3G60820	PROTEASOME SUBUNIT BETA TYPE-1 (PBF1)	Encodes 20S proteasome beta subunit PBF1 (PBF1). The proteasome is a multicatalytic proteinase complex which is characterized by its ability to cleave peptides with Arg, Phe, Tyr, Leu, and Glu adjacent to the leaving group at neutral or slightly basic pH. The proteasome has an ATP-dependent proteolytic activity.				-1.17983	-1.75815	1.43491	0.255085	-0.323234	0.00984958	0.225565	1.24988	1.75701	1.29785			-0.252684	-0.042902	1.06084			-0.535257	-0.434445	0	11	11	11	62.3	62.3	62.3	24.644	0	176.42	4081800000	62	NaN	NaN	NaN	1.06392	0.180723	AT3G60820.3; AT3G60820.1; AT3G60820.2	AT3G60820.3; AT3G60820.1; AT3G60820.2
AT1G19360	REDUCED RESIDUAL ARABINOSE 3 (RRA3)	Encodes an arabinosyltransferase that modifies extensin proteins in root hair cells.				-1.9796	-1.02539	1.10374	-0.875854	0.0783557	0.016814	0.225737	1.26018	0.703623	1.34742			-0.572159	-0.194584	-1.86082			0	0.468099	-0.233032	5	5	5	17.1	17.1	17.1	48.251	0	13.141	757980000	24	5	5	5	-1.36426	0.287733	AT1G19360.1	AT1G19360.1
AT1G19570	DEHYDROASCORBATE REDUCTASE (DHAR1)	Displays a dual function. As a soluble protein, exhibits glutathione-dependent thiol transferase and dehydroascorbate (DHA) reductase activities (PubMed:12077129). Key component of the ascorbate recycling system. Involved in the redox homeostasis, especially in scavenging of ROS under oxidative stresses, subsequently to biotic or abiotic inducers (PubMed:16262714). As a peripheral membrane protei…				-1.42403	-1.90979	1.20343	-0.220605	-0.706363	0.0163836	0.226133	0.807012	1.32237	1.4809			-0.138357	-0.623805	0.100347			0	-0.449878	-1.66921	15	15	15	84.5	84.5	84.5	23.641	0	323.31	27482000000	191	NaN	NaN	NaN	3.85184	0.204731	AT1G19570.1; AT1G19570.2; AT1G19550.1	AT1G19570.1; AT1G19570.2
AT3G11130	CLATHRIN HEAVY CHAIN 1 (CHC1)	CHC1 heavy chain subunit of clathrin. Involved in vesicle mediated trafficking. Mutants show reduced rates of endocytosis and defects clathrin mediated exocytosis. Mutants also have increased dehydration tolerance which may be related to the overall slower stomatal aperture dynamics. Overall growth is affected.				1.5161	1.8739	-1.1406	0.375505	0.733306	0.0171025	0.227325	-1.35739	-1.11993	-0.944472			1.0131	0.113414	0			-0.0471224	1.59531	0.65173	65	65	12	51.1	51.1	13.7	193.24	0	323.31	29984000000	409	65	65	12	4.03164	0.0857696	AT3G11130.1	AT3G11130.1
AT1G04170	EUKARYOTIC TRANSLATION INITIATION FACTOR 2 GAMMA SUBUNIT (EIF2 GAMMA)	protein synthesis initiation factor eIF2 gamma The mRNA is cell-to-cell mobile.				-1.90571	-0.653058	0.644078	-1.26163	-0.00898067	0.0176343	0.229846	0	1.5495	0.382733			-1.22228	-1.3997	-1.16291			0.168515	0.449802	-0.645259	10	10	10	30.3	30.3	30.3	50.853	0	106.91	4105000000	69	NaN	NaN	NaN	1.19283	0.130334	AT1G04170.1; AT4G18330.1; AT4G18330.2; AT2G18720.1	AT1G04170.1
AT2G23070	CASEIN KINASE II SUBUNIT ALPHA-4 (CKA4)	Encodes a chloroplast localized subunit of casien kinase4. Functions reduntantly with other alpha subunits (1, 2,and 3) in ABA mediated suppression of seed germination, lateral root development and flowering time.				-1.88064	-1.31722	1.26924	-0.611396	-0.047979	0.0190917	0.234024	1.0414	0.573355	2.19297			-0.336943	-0.324575	-1.17267			0.222327	0	-0.366264	5	5	3	12.7	12.7	6.5	50.236	0	10.982	435690000	16	5	5	3	-2.21529	0.314584	AT2G23070.1	AT2G23070.1
AT5G44720		Molybdenum cofactor sulfurase family protein;(source:Araport11)				-1.51749	-1.68408	1.3993	-0.118184	-0.284773	0.0181247	0.234684	1.34299	1.75711	1.09781			0	-1.05509	0.700537			-0.275456	-0.457329	-0.121535	8	8	8	44.5	44.5	44.5	34.798	0	84.31	964940000	23	NaN	NaN	NaN	-1.31382	0.648941	AT5G44720.1; AT5G44720.2	AT5G44720.1; AT5G44720.2
AT1G09010	Mannosylglycoprotein endo-beta-mannosidase (EBM)	Glycosidase that specifically hydrolyzes the Man-beta-1,4-GlcNAc linkage in the trimannosyl core structure of N-glycans. Does not hydrolyzes pyridylamino derivatives sugar chains containing Man-alpha-1,3-Man-beta or Xylose-beta-1,2-Man-beta.				-0.587944	-1.90888	0.691896	0.103952	-1.21698	0.0190245	0.235714	0.377378	0.391449	1.30686			-0.283555	0	0.595411			-0.365097	-1.76511	-1.52074	5	5	5	7.1	7.1	7.1	107.66	0	9.8178	638410000	24	5	5	5	-1.5461	0.16741	AT1G09010.1	AT1G09010.1
AT1G54010	GDSL-LIKE LIPASE 23 (GLL23)	GDSL-motif esterase/acyltransferase/lipase. Enzyme group with broad substrate specificity that may catalyze acyltransfer or hydrolase reactions with lipid and non-lipid substrates. Involved in the control of the PYK10 complex size and possibly substrate specificity. May be exported from the endoplamic reticulum upon interaction with MVP1.				1.93522	0.734745	-0.740833	1.19439	-0.00608833	0.0187925	0.23678	-1.14154	-0.410153	-0.670806			1.7886	1.48988	0.304685			-0.541503	0	0.523238	12	11	11	43.5	39.4	39.4	43.143	0	323.31	4536700000	81	12	11	11	1.28938	0.268482	AT1G54010.1	AT1G54010.1
AT3G32980	PEROXIDASE 32 (PER32)	Removal of H2O2, oxidation of toxic reductants, biosynthesis and degradation of lignin, suberization, auxin catabolism, response to environmental stresses such as wounding, pathogen attack and oxidative stress. These functions might be dependent on each isozyme/isoform in each plant tissue. Exhibits a Ca2+-pectate binding affinity which could be interpreted in vivo as a specificity to interact wi…				1.75923	0.17975	-0.448295	1.31094	-0.268545	0.0185712	0.237136	0	-0.957134	-0.38775			2.28829	0.83361	0.810917			-0.399161	-0.430012	0.0235388	13	13	9	40.6	40.6	31.5	38.847	0	323.31	62579000000	214	13	13	9	5.03069	0.236851	AT3G32980.1	AT3G32980.1
AT4G17870	REGULATORY COMPONENT OF ABA RECEPTOR 11 (RCAR11);PYRABACTIN RESISTANCE 1 (PYR1)	Encodes a member of the PYR (pyrabactin resistance )/PYL(PYR1-like)/RCAR (regulatory components of ABA receptor) family proteins with 14 members. PYR/PYL/RCAR family proteins function as abscisic acid sensors. Mediate ABA-dependent regulation of protein phosphatase 2Cs ABI1 and ABI2.				-1.96355	-1.01963	1.10427	-0.859274	0.0846473	0.0189858	0.238554	0.992571	0.998869	1.32138			-0.576687	-1.2548	-0.746334			1.06896	0	-0.815018	6	6	5	36.6	36.6	31.4	21.575	0	12.479	777830000	24	6	6	5	-1.34053	0.333154	AT4G17870.1	AT4G17870.1
AT3G44100		MD-2-related lipid recognition domain-containing protein;(source:Araport11)				-1.38595	-1.87525	0.910494	-0.475457	-0.964759	0.0185252	0.23885	1.0126	0.909818	0.809063			0	0.16133	-1.5877			-0.82376	-1.28361	-0.786907	3	3	3	23	23	23	16.07	0	7.6807	1645600000	10	3	3	3	-0.169971	0.352089	AT3G44100.1	AT3G44100.1
AT2G14720	VACUOLAR SORTING RECEPTOR 2 (VSR-2);VACUOLAR SORTING RECEPTOR 4 (VSR4); (MTV4);BINDING PROTEIN OF 80 KDA 2;1 (BP80-2;1);VACUOLAR SORTING RECEPTOR 2;1 (VSR2;1)	encodes a vacuolar sorting receptor				1.37417	1.6975	-1.40785	-0.033678	0.289646	0.0195851	0.240047	-1.2071	-0.864598	-2.15186			-0.670303	0	0.569269			0.0993709	0.178008	0.59156	7	7	6	17.4	17.4	17.4	69.812	0	37.729	1054400000	25	NaN	NaN	NaN	-0.702457	0.217931	AT2G14720.2; AT2G14720.1; AT2G14740.2; AT2G14740.1	AT2G14720.2; AT2G14720.1; AT2G14740.2; AT2G14740.1
AT3G23570		alpha/beta-Hydrolases superfamily protein;(source:Araport11)				-1.40435	-1.71182	1.39109	-0.01326	-0.320728	0.0205602	0.245258	2.03713	0.791409	1.34473			-0.735607	0.695827	0			-0.12081	-0.31666	-0.524715	6	6	6	40.6	40.6	40.6	26.53	0	12.997	737650000	29	6	6	6	-1.41477	0.186898	AT3G23570.1	AT3G23570.1
AT1G55890		Tetratricopeptide repeat (TPR)-like superfamily protein;(source:Araport11)				-0.3589	1.46432	-0.183018	-0.541917	1.28131	0.0201653	0.246437	0	-0.100756	-0.448297			-0.177992	-1.47652	0.0287597			1.81838	0.682359	1.34318	7	7	7	21.1	21.1	21.1	44.994	0	24.606	513480000	23	7	7	7	-1.93164	0.244655	AT1G55890.1	AT1G55890.1
AT3G59370		Vacuolar calcium-binding protein-like protein;(source:Araport11)				1.63053	1.59443	-1.38076	0.249766	0.213671	0.0204127	0.247182	-0.543002	-1.51998	-2.0793			0	0.662745	0.0865515			-0.29851	0.686728	0.252794	3	2	2	66.3	51.6	51.6	10.581	0	43.268	844120000	24	3	2	2	-0.94441	0.572128	AT3G59370.1	AT3G59370.1
AT2G24180	CYTOCHROME P450 71B6 (CYP71B6)	Encodes a cytochrome P450 monooxygenase that converts indole-3-acetonitrile to indole-3-aldehyde / indole-3-carboxylic acid and cyanide. The mRNA is cell-to-cell mobile.				-1.94333	-0.91041	1.0722	-0.871126	0.161792	0.0217407	0.247441	1.40683	0.103237	1.70654			-1.14752	-0.4757	-0.990159			-0.235119	0	0.720495	8	8	8	22.1	22.1	22.1	57.008	0	40.796	811620000	32	8	8	8	-1.21358	0.204616	AT2G24180.1	AT2G24180.1
AT5G44340	TUBULIN BETA CHAIN 4 (TUB4)	beta tubulin gene				1.46313	-0.196823	-0.0618282	1.4013	-0.258651	0.0214052	0.247604	-0.210463	-0.0489179	0.0738963			1.10741	0.698954	2.39754			-0.691042	-0.0849113	0	25	3	3	77.3	16	16	49.823	0	107.14	1860500000	27	25	3	3	-0.0512524	0.271688	AT5G44340.1	AT5G44340.1
AT1G30630		Coatomer epsilon subunit. The coatomer is a cytosolic protein complex that binds to dilysine motifs and reversibly associates with Golgi non-clathrin-coated vesicles, which further mediate biosynthetic protein transport from the ER, via the Golgi up to the trans Golgi network. The coatomer complex is required for budding from Golgi membranes, and is essential for the retrograde Golgi-to-ER transp…				1.87466	1.29617	-1.25607	0.618597	0.040106	0.0211622	0.247956	-1.29072	-0.906476	-1.571			0.607262	0	1.24853			0.364149	-0.812712	0.568881	11	11	11	73.6	73.6	73.6	32.602	0	133.27	4006700000	71	NaN	NaN	NaN	1.1939	0.217862	AT1G30630.1; AT2G34840.2; AT2G34840.1	AT1G30630.1
AT2G32730	26S PROTEASOME NON-ATPASE REGULATORY SUBUNIT 1 HOMOLOG A (RPN2A)	Acts as a regulatory subunit of the 26 proteasome which is involved in the ATP-dependent degradation of ubiquitinated proteins.				-1.80295	-1.51186	1.25738	-0.545569	-0.254473	0.0216015	0.248522	1.25355	0.388471	2.13013			-0.763743	-0.12813	-0.744833			0	0.00192836	-0.765348	14	14	9	21.2	21.2	9.7	108.98	0	88.24	4988900000	95	14	14	9	1.37979	0.153311	AT2G32730.1	AT2G32730.1
AT1G20580	Small nuclear ribonucleoprotein SmD3b (SMD3B)	Core component of the spliceosomal U1, U2, U4 and U5 small nuclear ribonucleoproteins (snRNPs), the building blocks of the spliceosome (By similarity). May play a major role in the splicing of cellular pre-mRNAs. Required for normal plant development (PubMed:21421416).				-1.23981	-1.90819	1.18929	-0.050519	-0.7189	0.0221934	0.250468	1.66463	1.34787	0.555375			-0.8255	0	0.673943			-0.645175	-0.303244	-1.20828	3	3	3	26	26	26	14.237	0	40.334	1717200000	30	NaN	NaN	NaN	-0.28241	0.43918	AT1G20580.1; AT1G76300.1; AT1G20600.1	AT1G20580.1
AT5G59870	HISTONE H2A 6 (HTA6)	Encodes HTA6, a histone H2A protein. Core component of nucleosome. Nucleosomes wrap and compact DNA into chromatin, limiting DNA accessibility to the cellular machineries which require DNA as a template. Histones thereby play a central role in transcription regulation, DNA repair, DNA replication and chromosomal stability. DNA accessibility is regulated via a complex set of post-translational mod…				-1.54011	0.270308	0.374892	-1.16521	0.6452	0.0226146	0.254905	0.746047	0	0.378629			-1.25678	-1.02921	-1.20965			1.3961	-0.473021	1.01252	4	3	3	34.7	28.7	28.7	15.966	0	17.159	849690000	25	4	3	3	-1.08627	0.300815	AT5G59870.1	AT5G59870.1
AT3G27300	GLUCOSE-6-PHOSPHATE DEHYDROGENASE 5 (G6PD5)	Catalyzes the rate-limiting step of the oxidative pentose-phosphate pathway, which represents a route for the dissimilation of carbohydrates besides glycolysis. The main function of this enzyme is to provide reducing power (NADPH) and pentose phosphates for fatty acid and nucleic acid synthesis which are involved in membrane synthesis and cell division.				1.76822	1.54592	-1.25144	0.516783	0.294481	0.0236392	0.256081	-1.70898	-1.00345	-1.04188			1.44517	0	0.105178			-0.350617	0.655737	0.578323	7	7	7	25.6	25.6	25.6	59.156	0	45.722	699320000	29	NaN	NaN	NaN	-1.44277	0.512206	AT3G27300.3; AT3G27300.2; AT3G27300.1	AT3G27300.3; AT3G27300.2; AT3G27300.1
AT2G19520	MULTICOPY SUPPRESSOR OF IRA1 4 (MSI4); (ACG1); (FVE); (NFC4)	Core histone-binding subunit that may target chromatin assembly factors, chromatin remodeling factors and histone deacetylases to their histone substrates in a manner that is regulated by nucleosomal DNA. Component of the flowering autonomous pathway which positively regulates flowering by promoting transcriptional repression of the flowering repressor FLC. May promote histone deacetylation at th…				-0.653542	-1.8774	0.643482	-0.0100603	-1.23392	0.0235522	0.257755	1.17332	0.621793	0.135333			0.883694	-0.913875	0			-1.38567	-1.16355	-1.15254	6	6	6	27.2	27.2	27.2	55.758	0	44.464	1087500000	35	NaN	NaN	NaN	-0.744249	0.107056	AT2G19520.1; AT4G29730.1	AT2G19520.1
AT2G19940		Putative N-acetyl-gamma-glutamyl-phosphate reductase;(source:Araport11)				1.54195	-0.253653	-0.516243	1.02571	-0.769897	0.0233142	0.259875	0.0739786	-1.355	-0.267709			1.15618	0.632816	1.28813			0	-1.26213	-1.04756	7	7	7	19.7	19.7	19.7	44.135	0	16.412	1280000000	22	NaN	NaN	NaN	-0.502172	0.186098	AT2G19940.2; AT2G19940.1	AT2G19940.2; AT2G19940.1
AT2G32240		early endosome antigen;(source:Araport11)				-1.44365	0.127492	0.0174262	-1.42622	0.144919	0.0234947	0.259876	0.0804977	-0.555264	0.527045			-1.49466	-0.619027	-2.16497			0.283035	0.151721	0	40	40	39	40.7	40.7	40	148.61	0	323.31	11231000000	190	40	40	39	2.68598	0.168231	AT2G32240.1	AT2G32240.1
AT2G02100	DEFENSIN-LIKE PROTEIN 2 (PDF2.2); LOW-MOLECULAR-WEIGHT CYSTEINE-RICH 69 (LCR69)	Predicted to encode a PR (pathogenesis-related) protein. Belongs to the plant defensin (PDF) family. Confers broad-spectrum resistance to pathogens. The mRNA is cell-to-cell mobile.				-1.92944	-0.872565	1.00813	-0.921307	0.135563	0.0258058	0.266057	0.643827	0.483088	1.89747			-0.685771	-1.07309	-1.00506			0.923432	0	-0.516743	1	1	1	31.2	31.2	31.2	8.524	0	60.259	1646500000	14	1	1	1	-0.258377	0.383121	AT2G02100.1	AT2G02100.1
AT4G21150	RIBOPHORIN II (RPN2);HAPLESS 6 (HAP6)	ribophorin II (RPN2) family protein;(source:Araport11)				0.0113663	1.66653	-0.406772	-0.395406	1.25976	0.0248552	0.26688	-0.294308	0	-0.926009			-0.536193	0.166413	-0.816438			0.72919	2.19246	0.857633	18	18	18	33.6	33.6	33.6	74.667	0	168.24	4061200000	107	NaN	NaN	NaN	1.14807	0.191637	AT4G21150.3; AT4G21150.1; AT4G21150.2	AT4G21150.3; AT4G21150.1; AT4G21150.2
AT4G24280	HEAT SHOCK 70 KDA PROTEIN 6 (HSP70-6)	Involved in protein import into chloroplasts during early developmental stages. Acts redundantly with HSP70-7 in the thermotolerance of germinating seeds. In cooperation with other chaperones, Hsp70s stabilize preexistent proteins against aggregation and mediate the folding of newly translated polypeptides in the cytosol as well as within organelles. These chaperones participate in all these proc…				-1.7204	-1.47889	1.32718	-0.393226	-0.151707	0.0257919	0.268385	2.04589	1.54356	0.392087			0.272183	-0.735788	-0.716072			0	-0.379605	-0.0755147	18	18	6	26.3	26.3	8.8	76.507	0	190.16	4572900000	105	18	18	6	1.27724	0.0854225	AT4G24280.1	AT4G24280.1
AT4G02510	TRANSLOCON AT THE OUTER ENVELOPE MEMBRANE OF CHLOROPLASTS 159 (TOC159);TRANSLOCON AT THE OUTER ENVELOPE MEMBRANE OF CHLOROPLASTS 86 (TOC86); (ATTOC159);TRANSLOCON AT THE OUTER ENVELOPE MEMBRANE OF CHLOROPLASTS 160 (TOC160);PLASTID PROTEIN IMPORT 2 (PPI2)	An integral membrane GTPase that functions as a transit-sequence receptor required for the import of proteins necessary for chloroplast biogenesis. Located in the outer chloroplast membrane. Phosphorylation of the G-domains regulate translocon assembly. The mRNA is cell-to-cell mobile.				0.498861	1.77267	-0.443598	0.0552627	1.32907	0.0257549	0.270408	0	-0.739796	-0.590998			-0.208248	0.50838	-0.134344			0.597193	2.27843	1.1116	9	9	9	9.4	9.4	9.4	160.82	0	43.871	574010000	27	9	9	9	-1.67201	0.113609	AT4G02510.1	AT4G02510.1
AT5G14030		translocon-associated protein beta (TRAPB) family protein;(source:Araport11)				1.29871	1.87276	-1.19504	0.103663	0.677715	0.025538	0.271529	-1.22042	-0.924688	-1.44002			1.06236	-0.75137	0			0.756339	1.13917	0.137636	4	4	4	29.2	29.2	29.2	21.104	0	110.74	3973700000	40	NaN	NaN	NaN	1.19323	0.169663	AT5G14030.4; AT5G14030.3; AT5G14030.2; AT5G14030.1	AT5G14030.4; AT5G14030.3; AT5G14030.2; AT5G14030.1
AT2G22250	ASPARTATE AMINOTRANSFERASE (AAT); MATERNAL EFFECT EMBRYO ARREST 17 (MEE17)	Prokaryotic-type aspartate aminotransferase. Has also a prenate transaminase activity. Involved in the aromatic amino acids biosynthesis pathway via the arogenate route. Required for the transamination of prephenate into arogenate. Required for early development of the embryo. Encodes a prokaryotic-type plastidic aspartate aminotransferase with glutamate/aspartate-prephenate aminotransferase (PAT…				-1.42575	-1.83288	1.20562	-0.220127	-0.627254	0.0253936	0.271683	1.8168	0.604826	1.19524			-0.815413	-0.31769	0.472723			0	-1.21014	-0.671623	10	10	10	34.3	34.3	34.3	46.038	0	66.351	1789200000	52	NaN	NaN	NaN	-0.126566	0.253451	AT2G22250.1; AT2G22250.3; AT2G22250.2	AT2G22250.1; AT2G22250.3; AT2G22250.2
AT4G35260	ISOCITRATE DEHYDROGENASE 1 (IDH1)	Encodes a regulatory subunit of the mitochondrially-localized NAD+- dependent isocitrate dehydrogenase. Performs an essential role in the oxidative function of the citric acid cycle.				-1.77386	-1.54095	1.15954	-0.614321	-0.381413	0.0271993	0.278943	2.08904	0.798214	0.59136			-0.713454	-1.16395	0.0344398			-0.826532	0	-0.317707	16	16	9	52.9	52.9	36.2	39.626	0	323.31	9626300000	124	NaN	NaN	NaN	2.34284	0.0797502	AT4G35260.1; AT4G35650.1; AT1G32480.1	AT4G35260.1
AT4G29040	REGULATORY PARTICLE AAA-ATPASE 2A (RPT2a)	RPT2a encodes the 26S proteasome subunit. It is required for root meristem maintenance, and regulates gametogenesis. RPT2a is also shown to regulate gene silencing via DNA methylation.				1.82743	1.42095	-1.13335	0.694077	0.287602	0.0290849	0.292145	-0.913613	-0.945604	-1.54083			0.239481	0	1.84275			0.338124	-0.0474256	0.572108	14	14	14	47.6	47.6	47.6	49.369	0	215.83	3764700000	69	NaN	NaN	NaN	1.05214	0.185605	AT4G29040.1; AT2G20140.1	AT4G29040.1; AT2G20140.1
AT2G03440	NODULIN-RELATED PROTEIN 1 (NRP1)	Prevents accumulation of abscisic acid (ABA) after heat treatment, thus reducing thermotolerance. May be a negative regulator of the ABA signaling/synthesis pathway (PubMed:20016941). Required for defense responses against avirulent bacteria such as P.syringae pv. tomato DC3000 (avrRpt2). Induced at the transcriptional level by Pseudomonas syringae pv. tomato infection.				-1.04402	-1.67498	1.35033	0.306313	-0.324655	0.0298909	0.292456	1.23769	0.675854	2.13744			0.981326	-0.01632	-0.0460685			-0.448267	-0.525699	0	3	3	3	25.7	25.7	25.7	19.7	0	17.419	551620000	18	3	3	3	-1.99664	0.407648	AT2G03440.1	AT2G03440.1
AT1G17860	KUNITZ TRYPSIN INHIBITOR 2 (KTI2)	Kunitz family trypsin and protease inhibitor protein;(source:Araport11)				-0.635609	-1.88017	0.944966	0.309356	-0.9352	0.028418	0.293121	1.23419	0.78083	0.819877			1.41205	0	-0.483981			-0.682772	-1.41312	-0.709708	14	14	14	70.9	70.9	70.9	22.081	0	323.31	21516000000	122	14	14	14	3.51326	0.269439	AT1G17860.1	AT1G17860.1
AT1G15950	CINNAMOYL COA REDUCTASE 1 (CCR1);IRREGULAR XYLEM 4 (IRX4)	Encodes a cinnamoyl CoA reductase. Involved in lignin biosynthesis. Involved in the latter stages of lignin biosynthesis. Catalyzes one of the last steps of monolignol biosynthesis, the conversion of cinnamoyl-CoAs into their corresponding cinnamaldehydes. The mRNA is cell-to-cell mobile.				-1.21354	-1.89735	1.0422	-0.17134	-0.855144	0.0290631	0.294679	1.07475	0.690119	1.36174			-0.890253	0.376234	0			-0.372968	-1.81653	-0.375933	6	6	6	22	22	22	37.186	0	34.078	1611300000	35	NaN	NaN	NaN	-0.259048	0.240602	AT1G15950.2; AT1G15950.1	AT1G15950.2; AT1G15950.1
AT1G59359	40S RIBOSOMAL PROTEIN S2-2 (RPS2B)	Ribosomal protein S5 family protein;(source:Araport11)				0.0595753	1.68209	-0.673076	-0.613501	1.00901	0.0298391	0.295044	0	-0.772919	-1.24631			-1.17213	0.0385358	-0.706909			1.70165	0.346237	0.979154	7	3	3	28.5	13.7	13.7	30.771	0	32.092	2669400000	22	NaN	NaN	NaN	0.539255	0.11087	AT1G59359.1; AT1G58983.1; AT1G58684.1; AT1G58380.1; AT3G57490.1	AT1G59359.1; AT1G58983.1; AT1G58684.1; AT1G58380.1
AT3G57410	VILLIN 3 (VLN3)	Encodes a protein with high homology to animal villin. VLN3 is a Ca2+-regulated villin involved in actin filament bundling. Binds actin and actin filament bundles in a Ca2+-insensitive manner, but severs actin filaments in a calcium-dependent manner, regardless of the presence or not of VLN1 (AC O81643). Acts redundantly with VLN2 (AC O81644) to generate thick actin filament bundles, to regulate …				1.35931	-0.40045	-0.0605257	1.29879	-0.460976	0.0297247	0.295821	-0.314298	-0.257736	0.390457			1.89585	1.60074	0.399765			-0.238867	-1.14406	0	19	15	14	27.8	22.6	21.5	106.35	0	66.321	2763500000	63	19	15	14	0.577784	0.172755	AT3G57410.1	AT3G57410.1
AT2G43910	HARMLESS TO OZONE LAYER 1 (HOL1)	S-adenosyl-L-methionine-dependent methyltransferase. Involved in glucosinolate metabolism and defense against phytopathogens. Highly reactive to thiocyanate (NCS-) derived from myrosinase-mediated hydrolysis of glucosinolates upon tissue damage.				-0.274926	-1.71997	0.40469	0.129764	-1.31528	0.0289149	0.295926	0.546926	0.473293	0.193851			0	-0.323423	0.712714			-1.31594	-0.410266	-2.21962	9	9	9	56.8	56.8	56.8	25.288	0	95.055	10081000000	84	NaN	NaN	NaN	2.50181	0.315634	AT2G43910.1; AT2G43910.2; AT2G43910.3; AT2G43920.3; AT2G43920.2; AT2G43920.1	AT2G43910.1; AT2G43910.2; AT2G43910.3
AT5G52240	MEMBRANE STEROID BINDING PROTEIN 1 (MSBP1); (ATMP1);ARABIDOPSIS THALIANA MEMBRANE-ASSOCIATED PROGESTERONE BINDING PROTEIN 5 (AtMAPR5)	Encodes a protein with similarity to progesterone-binding proteins in animals. Has been shown to bind steroids in vitro. Expressed in aerial portions of the plant excluding mature flowers and siliques. Antisense experiments suggest a role in inhibition of hypocotyl cell elongation. Expression is suppressed light grown seedlings transferred to the dark. The mRNA is cell-to-cell mobile. Negatively …				-0.058832	1.62641	-0.448417	-0.507249	1.17799	0.0296895	0.298126	0	-0.406123	-0.939127			-0.041482	0.163996	-1.64426			1.01389	1.16645	1.35364	5	5	4	39.5	39.5	32.7	24.405	0	161.65	1673400000	27	NaN	NaN	NaN	-0.148746	0.208336	AT5G52240.1; AT5G52240.2	AT5G52240.1; AT5G52240.2
AT1G20010	TUBULIN BETA-5 CHAIN (TUB5)	beta tubulin				1.7869	0.318932	-0.751314	1.03559	-0.432383	0.03183	0.305333	-0.629593	-1.62435	0			0.680924	1.50521	0.920632			-0.758864	-0.84684	0.308556	23	11	5	69.5	32.3	12.2	50.342	0	145.97	5423000000	77	23	11	5	1.54713	0.103003	AT1G20010.1	AT1G20010.1
AT5G19440		similar to Eucalyptus gunnii alcohol dehydrogenase of unknown physiological function (GI:1143445), apple tree, PIR:T16995; NOT a cinnamyl-alcohol dehydrogenase				-0.897434	-1.77788	1.23573	0.338297	-0.542145	0.0316531	0.305724	0.438055	1.32864	1.9405			1.05579	-0.0408983	0			-0.709044	-0.114189	-0.803203	13	13	13	58	58	58	35.593	0	178.83	6764200000	98	13	13	13	1.75222	0.163694	AT5G19440.1	AT5G19440.1
AT1G27970	NUCLEAR TRANSPORT FACTOR 2B (NTF2B)	Encodes an ortholog of yeast NTF2, a nuclear envelop transport protein that functions as the nuclear import receptor for RanGDP, an essential player in nucleocytoplasmic transport. Facilitates protein transport into the nucleus. Interacts with various nucleoporins and with Ran-GDP. Could be part of a multicomponent system of cytosolic factors that assemble at the pore complex during nuclear impor…				-1.6354	-1.67112	1.1395	-0.495903	-0.531629	0.0313658	0.306539	1.62802	0.360079	1.43039			-1.00878	-0.47893	0			0.295476	-1.1077	-0.782662	5	5	5	80.2	80.2	80.2	14.002	0	41.685	3117000000	46	NaN	NaN	NaN	0.691149	0.196366	AT1G27970.1; AT1G27970.2	AT1G27970.1; AT1G27970.2
AT5G63910	FARNESYLCYSTEINE LYASE (FCLY)	Encodes a farnesylcysteine lyase (EC 1.8.3.5) involved in a salvage /detoxification pathway of farnesylcysteine (FC) residues that are liberated during the degradation of prenylated proteins. Because FC is a competitive inhibitor of prenylcysteine methyltransferases involved in the down-regulation of ABA signaling, fcly mutants with elevated FC levels are hypersensitive to ABA. The protein also a…				0.798549	1.8933	-0.910516	-0.111967	0.982781	0.033472	0.315563	-0.64564	0.00381332	-2.08972			-0.116773	-0.219127	0			0.651594	1.36336	0.933389	3	3	3	13.2	13.2	13.2	55.297	0	10.354	85149000	16	3	3	3	-4.40108	0.434657	AT5G63910.1	AT5G63910.1
AT3G48000	ALDEHYDE DEHYDROGENASE 2B4 (ALDH2B4); ALDEHYDE DEHYDROGENASE 2A (ALDH2A); ALDEHYDE DEHYDROGENASE 2 (ALDH2)	Encodes a putative (NAD+) aldehyde dehydrogenase.				-0.882442	-1.89764	0.894892	0.0124503	-1.00275	0.0336781	0.3158	0.679023	0.0578626	1.94779			-0.142081	0.179432	0			-0.34862	-1.4543	-1.20532	15	15	14	40.3	40.3	38.8	58.588	0	290.37	6816500000	90	15	15	14	1.89262	0.170355	AT3G48000.1	AT3G48000.1
[truncated: 53 more rows]

## Sheet: Unique
Table S9. Proteome analysis of Col-0 versus mkk1 and mkk2 - differentially abundant proteins (unique)
[truncated: 13 more rows]
